# Supplementary material for: Primary human ovarian interstitial cells contribute to murine follicle growth through follicle-interstitial paracrine crosstalk
Source: Research Square preprint supplement (doi:10.21203/rs.3.rs-7593401/v1), 2025-09-24
Supplement: Supplementary file 1 [file ea31e5e8e39f8735f924bda2.pdf]

## Figures

**Figure S1.** Representative oocyte staging by brightfield and fluorescence microscopy and stratification of follicle growth and survival by participant chemotherapy status.

**Figure S2.** Experimental schematic of co-culture and conditioned media experiments.

**Figure S3.** Single cell RNA-sequencing of human ovarian tissue from pediatric and adolescent individuals.

**Figure S4.** Comparison of theca/stromal subpopulations to previously published datasets.

**Figure S5.** Theca/stromal subpopulations reflect variable biological functions.

**Figure S6.** Proteomics analysis of parallel experiments utilizing murine follicles co-cultured with human ovarian tissue-derived interstitial cell-condition media or co-culture.

**Figure S7.** Proteins enriched in conditioned media culture compared to co-culture.

## Tables

*Those denoted by an asterisk are only available as .xlsx files*

**Supplementary Table 1.** Participant demographic and clinical information for samples utilized in this study.

**Supplementary Table 2A.** Quality control and sample metrics for scRNA-seq.

**Supplementary Table 2B.** Top 10 differentially expressed genes for each cell cluster.

**Supplementary Table 2C\*.** Differentially expressed genes in prepubertal and postpubertal theca/stromal cells.

**Supplementary Table 2D\*.** Differentially expressed genes for each theca/stromal cell subpopulation.

**Supplementary Table 3A\*.** Data file annotations for proteomics analysis.

**Supplementary Table 3B\*.** Log intensities of identified proteins per sample.

**Supplementary Table 3C\*.** Sample counts for identified proteins per group.

**Supplementary Table 3D\*.** Proteins identified in Pre-D0 and Post-D0 samples with threshold for detection in  $n \geq 3$  of 5 samples in a group.

**Supplementary Table 3E\*.** Proteins identified in CC and CM samples with threshold for detection in  $n \geq 3$  of 5 samples in a group.

**Supplementary Table 4A\*.** Pairwise comparisons for proteomics analysis.

**Supplementary Table 4B\*.** Pairwise differential expression between sample groups.

**Supplementary Table 4C.** Predicted source for CM- and CC-enriched or unique proteins for all samples (Pre and Post combined).

**Supplementary Table 5.** Antibodies used for immunocytochemistry.

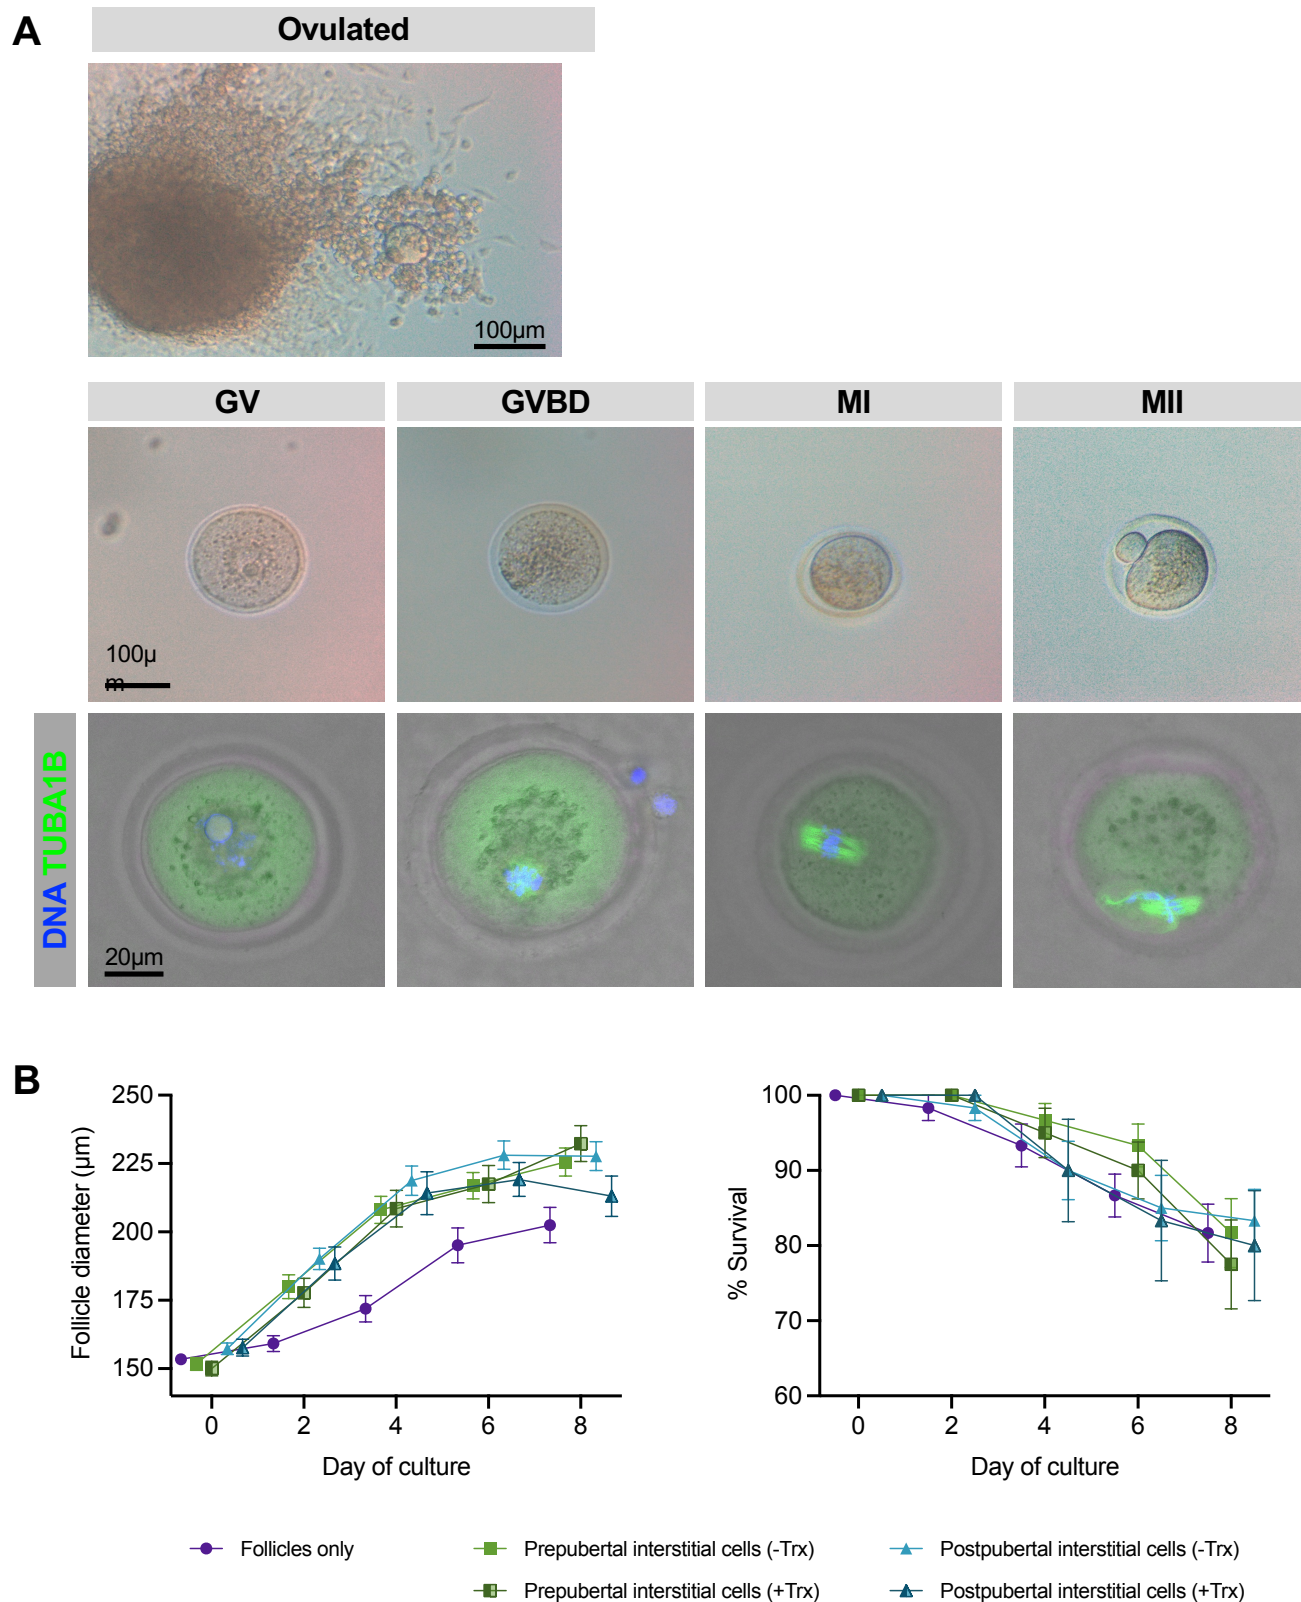

**Figure S1. Representative oocyte staging by brightfield and fluorescence microscopy and stratification of follicle growth and survival by participant chemotherapy status.** (A) Examples of maturation outcomes shown in **Figure 1E**. GV, germinal vesicle; GVBD, germinal vesicle breakdown; MI, metaphase I oocyte; MII, metaphase II oocyte. (B) Follicle diameter and survival (mean  $\pm$  SEM) stratified by previous chemotherapy treatment. Trx, history of previous cyclophosphamide equivalent dose.

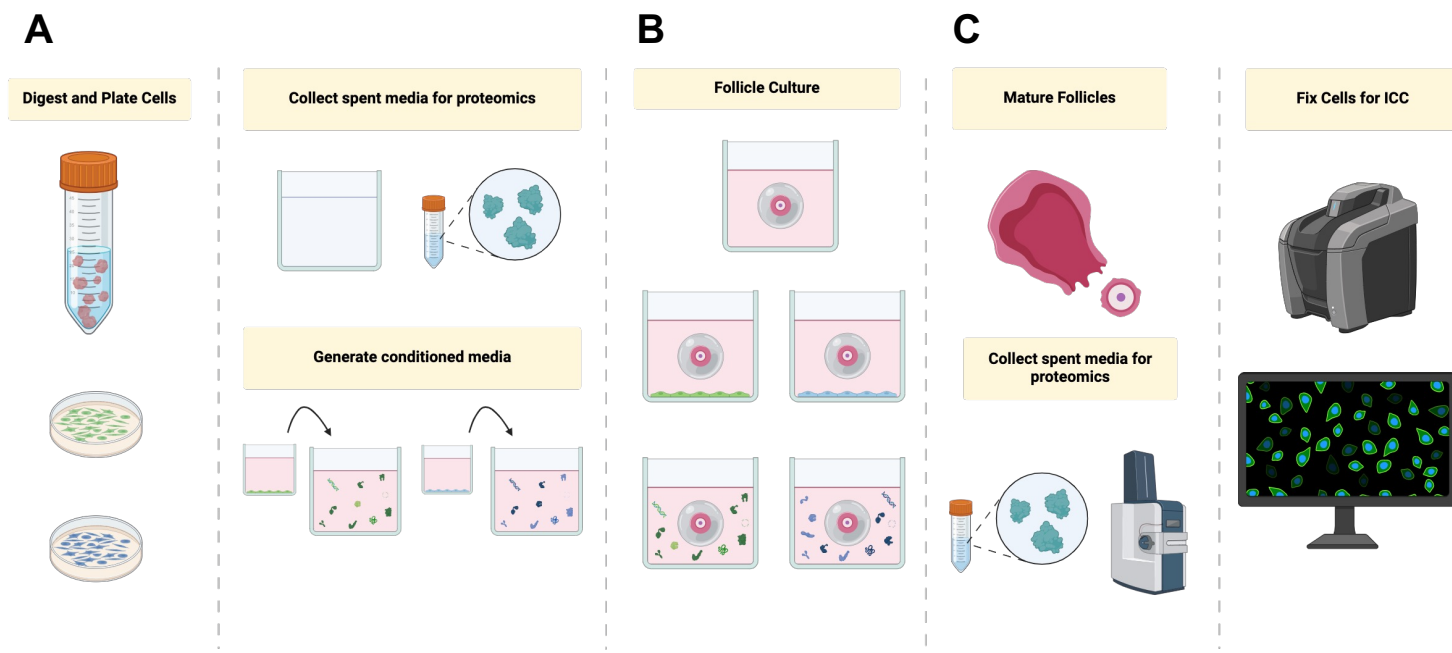

**Figure S2. Experimental schematic of co-culture and conditioned media experiments.** (A) Ovarian interstitial cells isolated from human ovary tissue were seeded and allowed to reach confluence, then treated with mitomycin C to pause proliferation and allowed to recover overnight. For interstitial cell conditioned media groups, cells were incubated in DMEM for 18-24 hours before media was collected and added to alginate-encapsulated secondary murine follicles. (B) Encapsulated follicles were cultured in control groups, with interstitial cells (co-culture, CC), or with conditioned media (CM). Follicles were monitored by brightfield microscopy and evaluated for diameter and survival, with half media changes performed every other day of culture beginning at culture day 2. (C) At end of culture (day 8 or day 6), cultured follicles were lysed, matured, and classified by brightfield or immunofluorescence microscopy using established morphologic criteria. Cells from CC groups were fixed in paraformaldehyde for ICC and spent media from CC and CM conditions was collected and stored at -80°C until lyophilization.

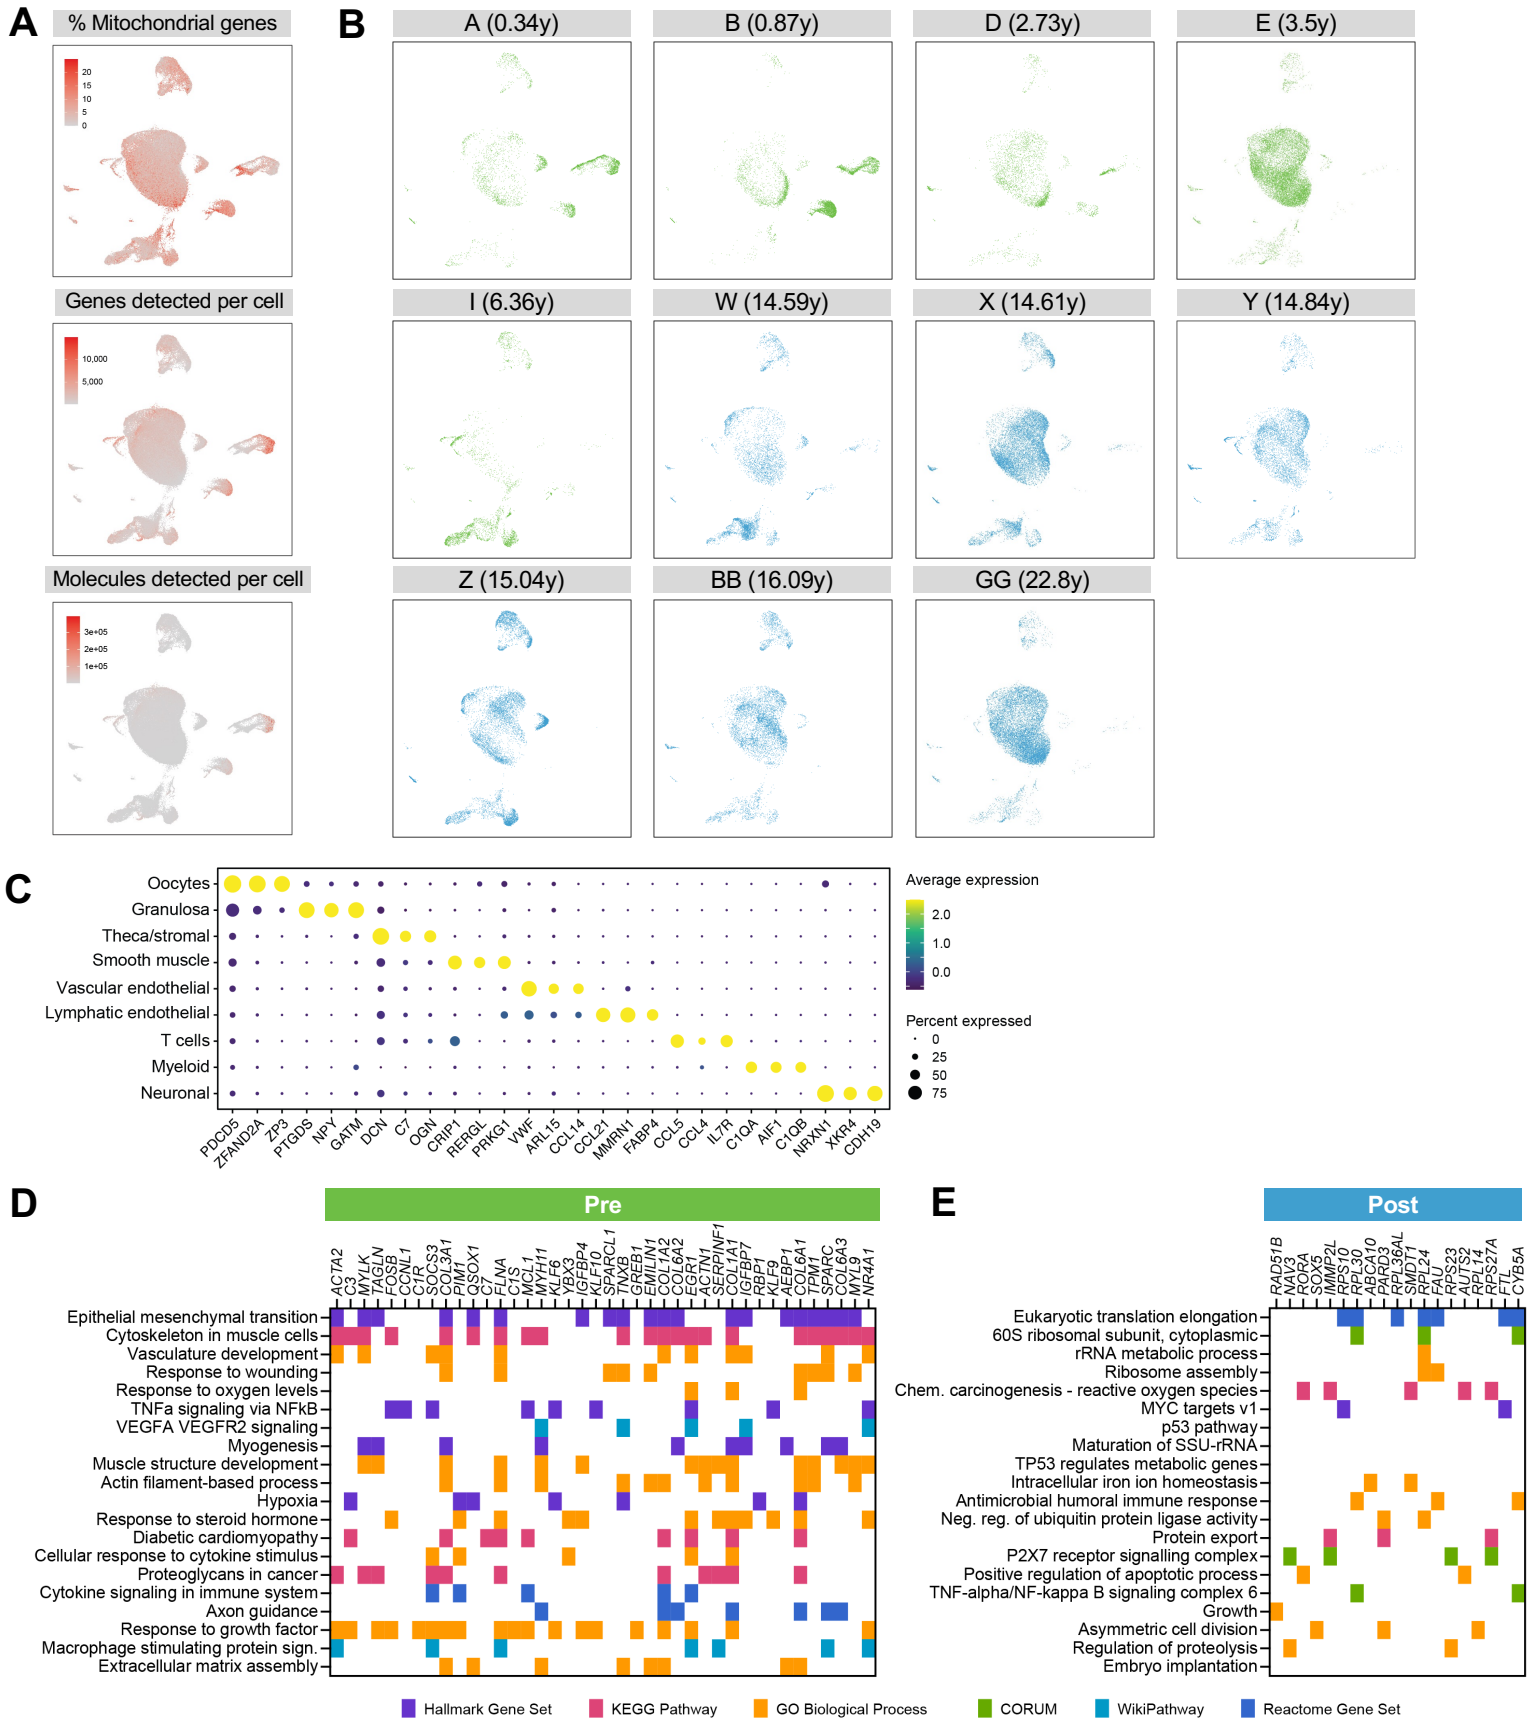

**Figure S3. Single cell RNA-sequencing of human ovarian tissue from pediatric and adolescent individuals.** (A) Uniform Manifold Approximation Projection (UMAP) of all analyzed cells, colored by quality control metrics. (B) UMAP of cells analyzed per individual sample, listed by age (green, prepubertal; blue, postpubertal). (C) Dot plot of selected top differentially expressed genes per cluster. (D-E) Member genes of selected enriched pathways for prepubertal (D) and postpubertal (E) theca/stromal cells; rows are colored by ontology database and ordered by enrichment p-value (most significant at top). Neg., negative; Reg., regulation; Sig., signaling.



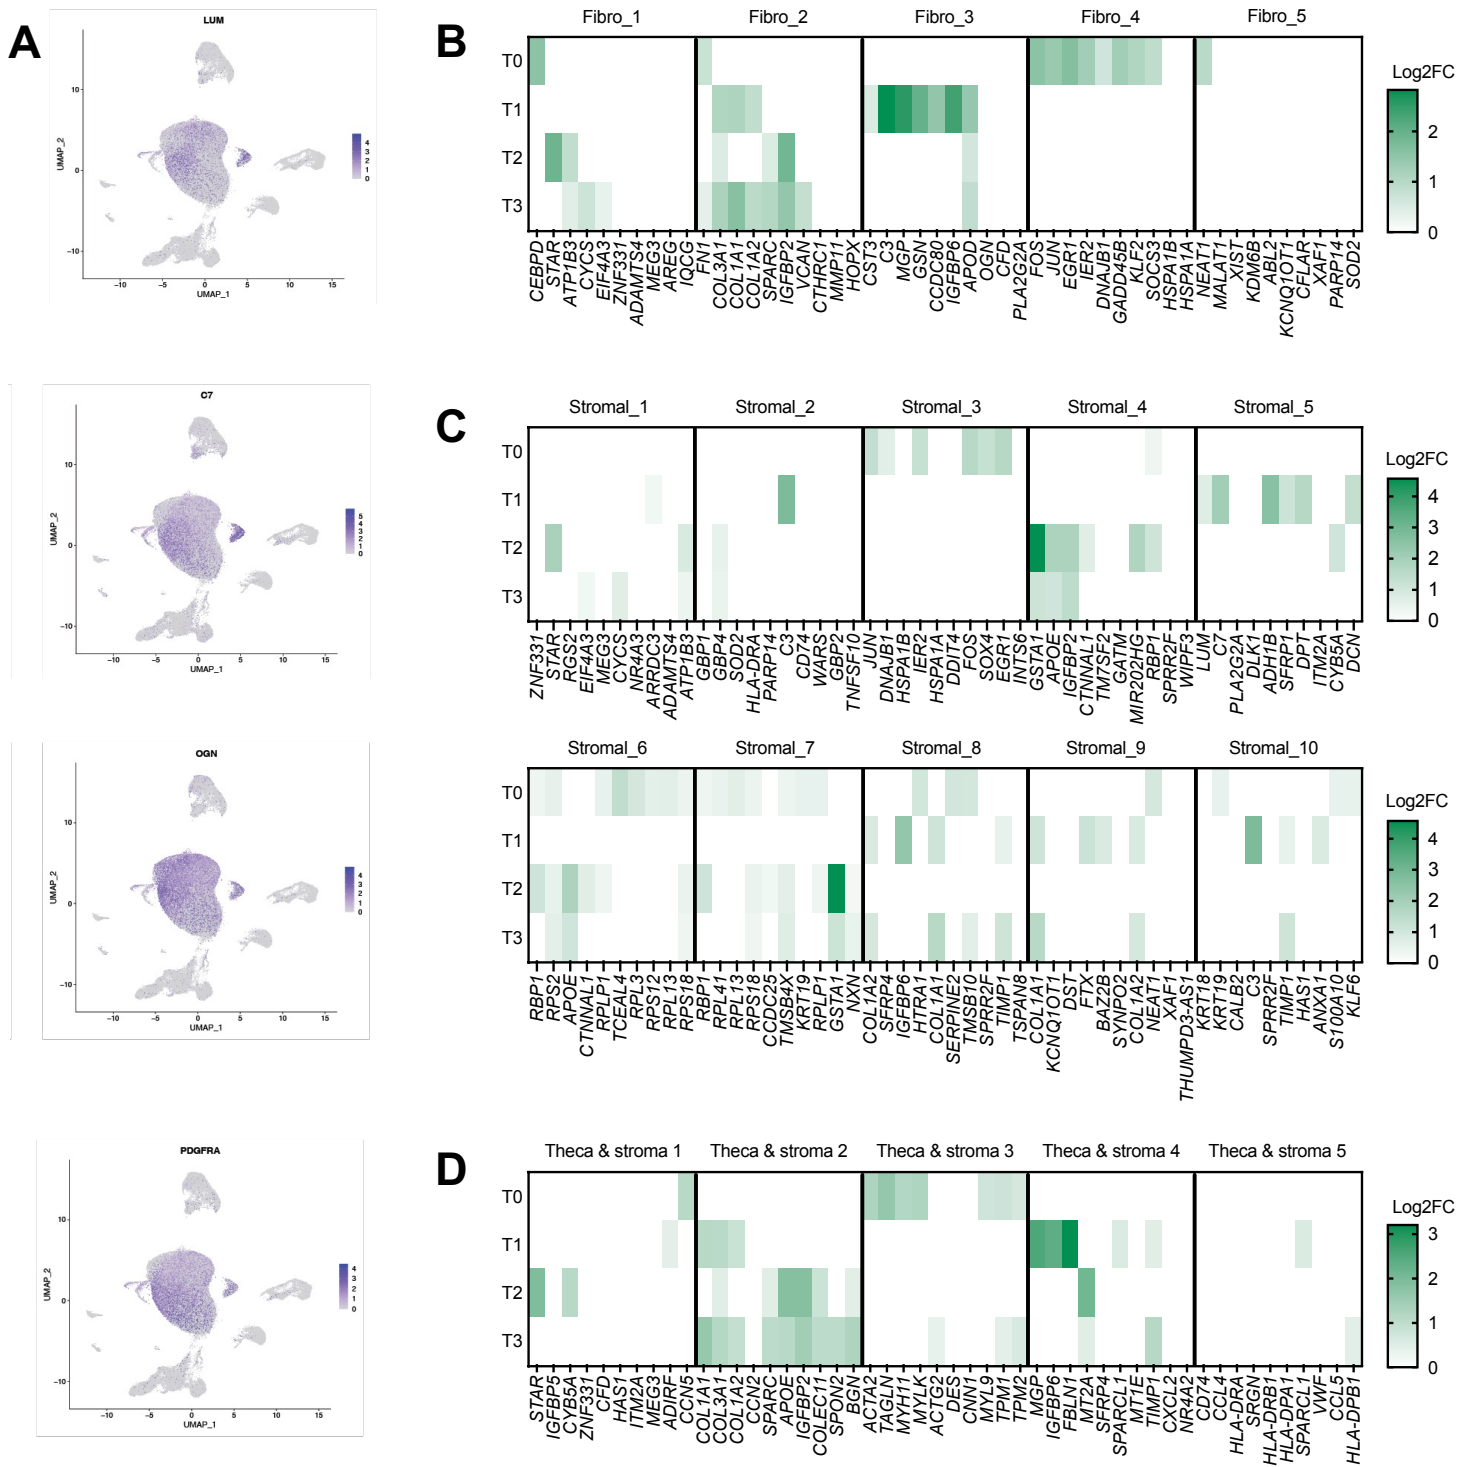

**Figure S4. Comparison of theca/stromal subpopulations to previously published datasets.** (A) UMAP showing gene expression of stromal cell markers *LUM*, *C7*, *OGN*, and *PDGFRA*. (B-D) Enrichment in each theca/stromal subpopulation of top 10 enriched genes in annotated stromal populations in previously published datasets: Deng 2022 (B; n=6 samples, ages 47-70)<sup>60</sup>, Lengyel 2022 (C; n=6 samples, ages 55-65)<sup>40</sup>, and Wu 2024 (D; n=9 samples, ages 18-49)<sup>33</sup>.

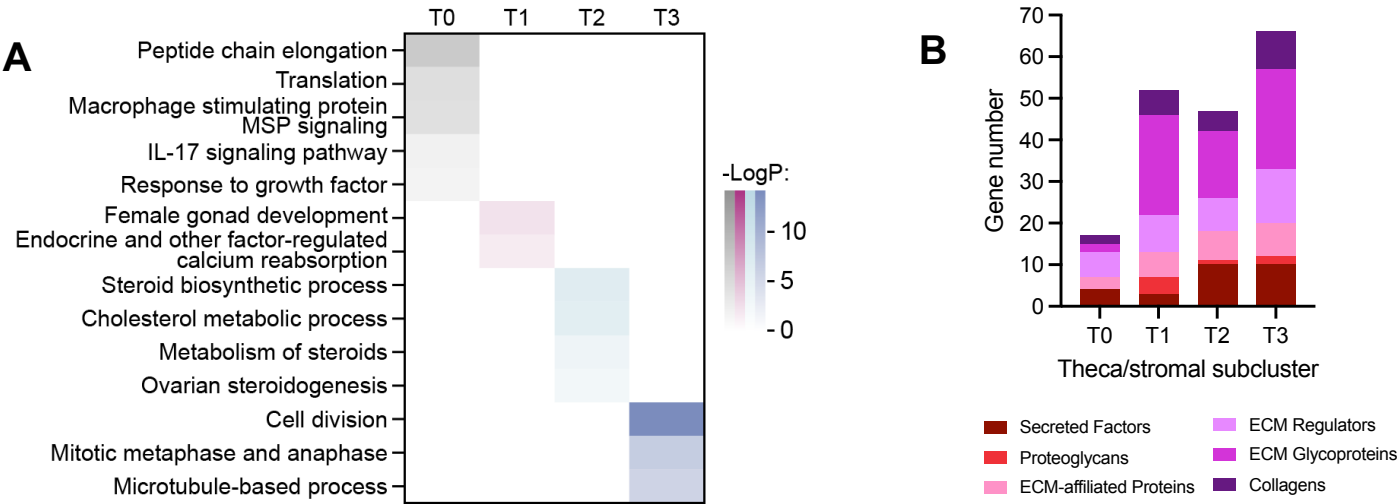

**Figure S5. Theca/stromal subpopulations reflect variable biological functions.** (A) Pathway enrichment for top 50 genes upregulated in each theca/stromal subpopulation. Adjusted p-values are expressed as negative  $\log_{10}$ . (B) Matrisome-annotated<sup>50</sup> significantly enriched genes in each theca/stromal subpopulation. SMC, smooth muscle cell; V. endothelial, vascular endothelial.

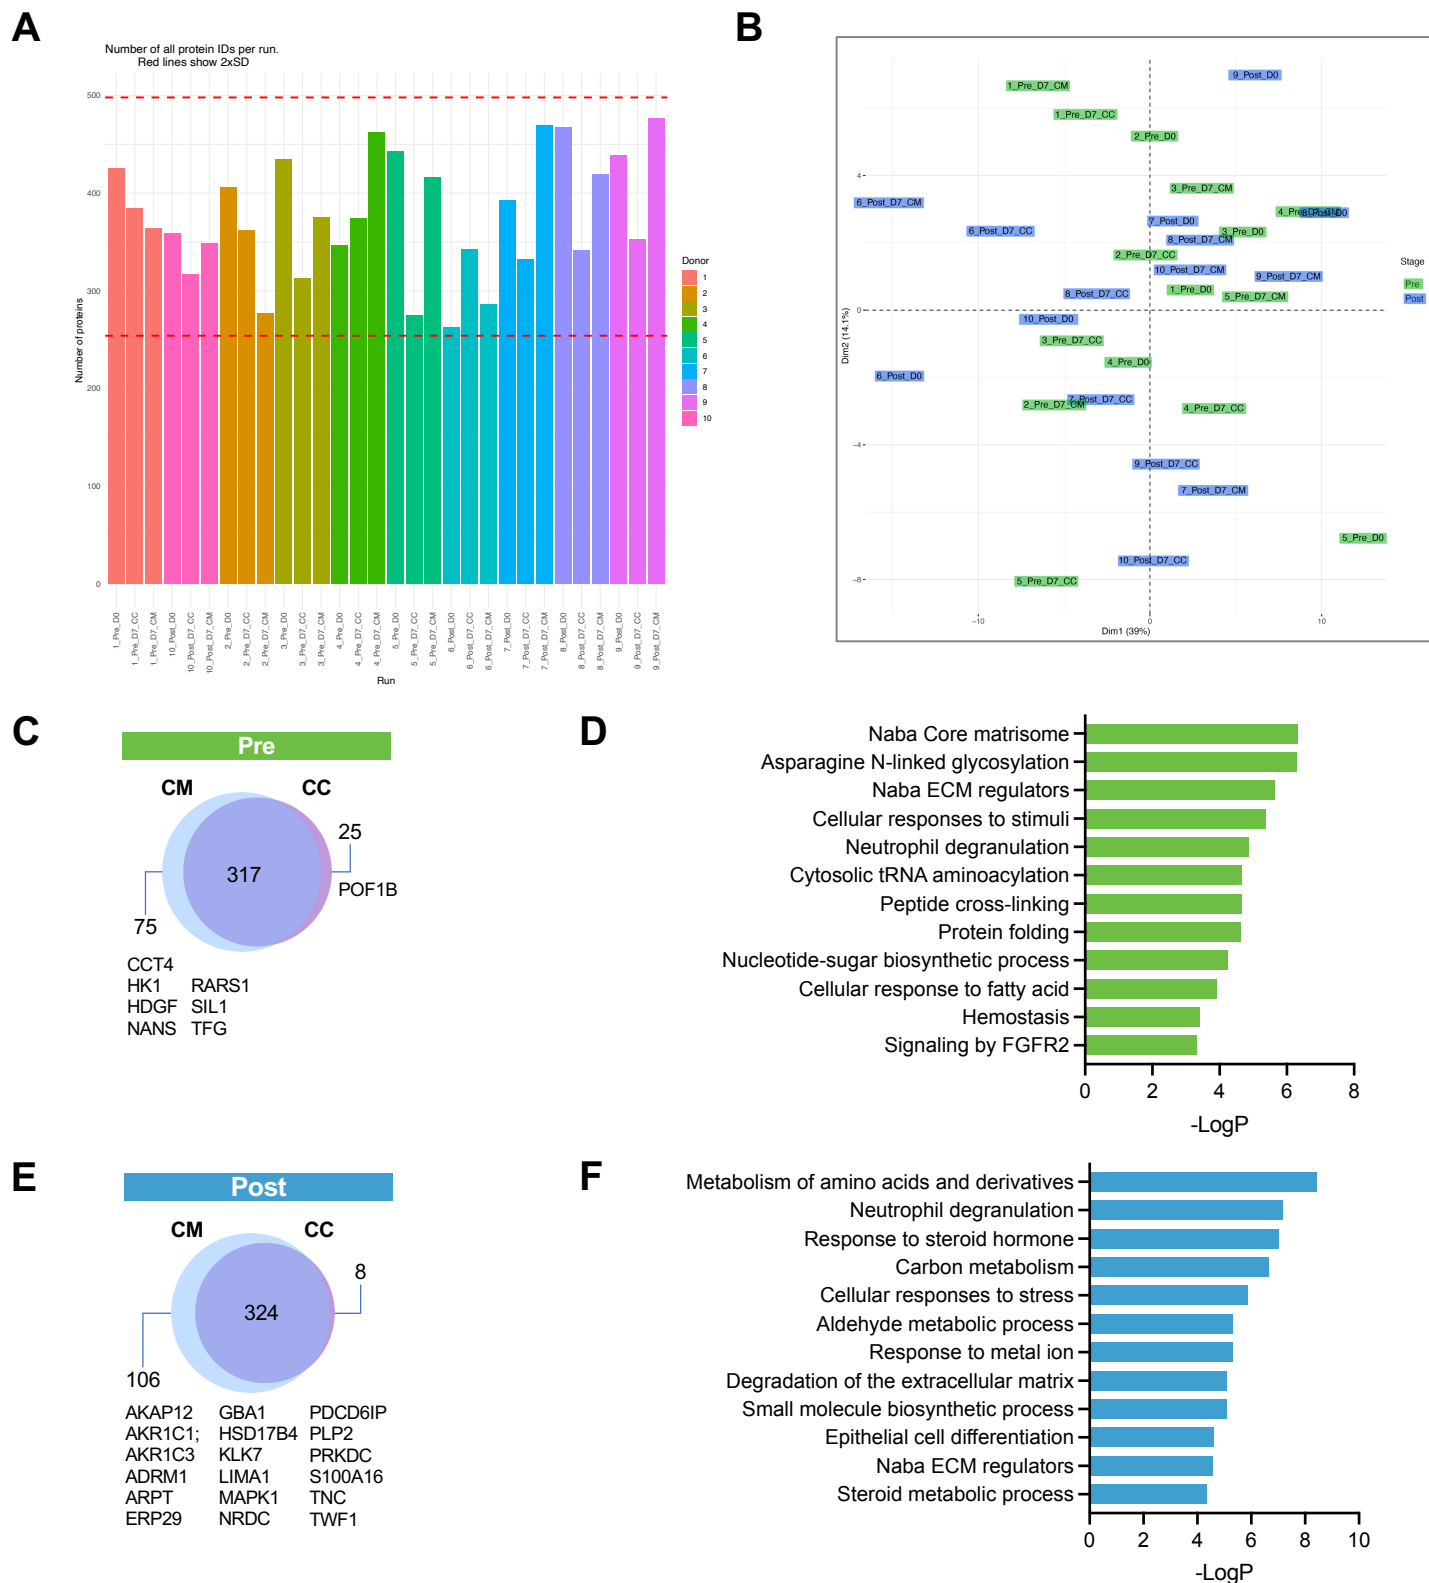

**Figure S6. Proteomics analysis of parallel experiments utilizing murine follicles co-cultured with human ovarian tissue-derived interstitial cell-condition media or co-culture.** (A) Unique human proteins detected per sample. (B) Principal component analysis (PCA) of samples colored by age group. (C) Number of proteins detected in Pre-CC and Pre-CM that were present in  $\geq 3$  of 5 samples per group. Proteins listed are detected in zero samples of other group. (D) Selected enriched pathways for 75 proteins unique to Pre-CM compared to Pre-CC, as shown in panel C. (E) Number of proteins detected in Post-CC and Post-CM that were present in  $\geq 3$  of 5 samples per group. Proteins listed are detected in zero samples of other group. (F) Selected enriched pathways for 106 proteins unique to Post-CM compared to Post-CC, as shown in panel E.

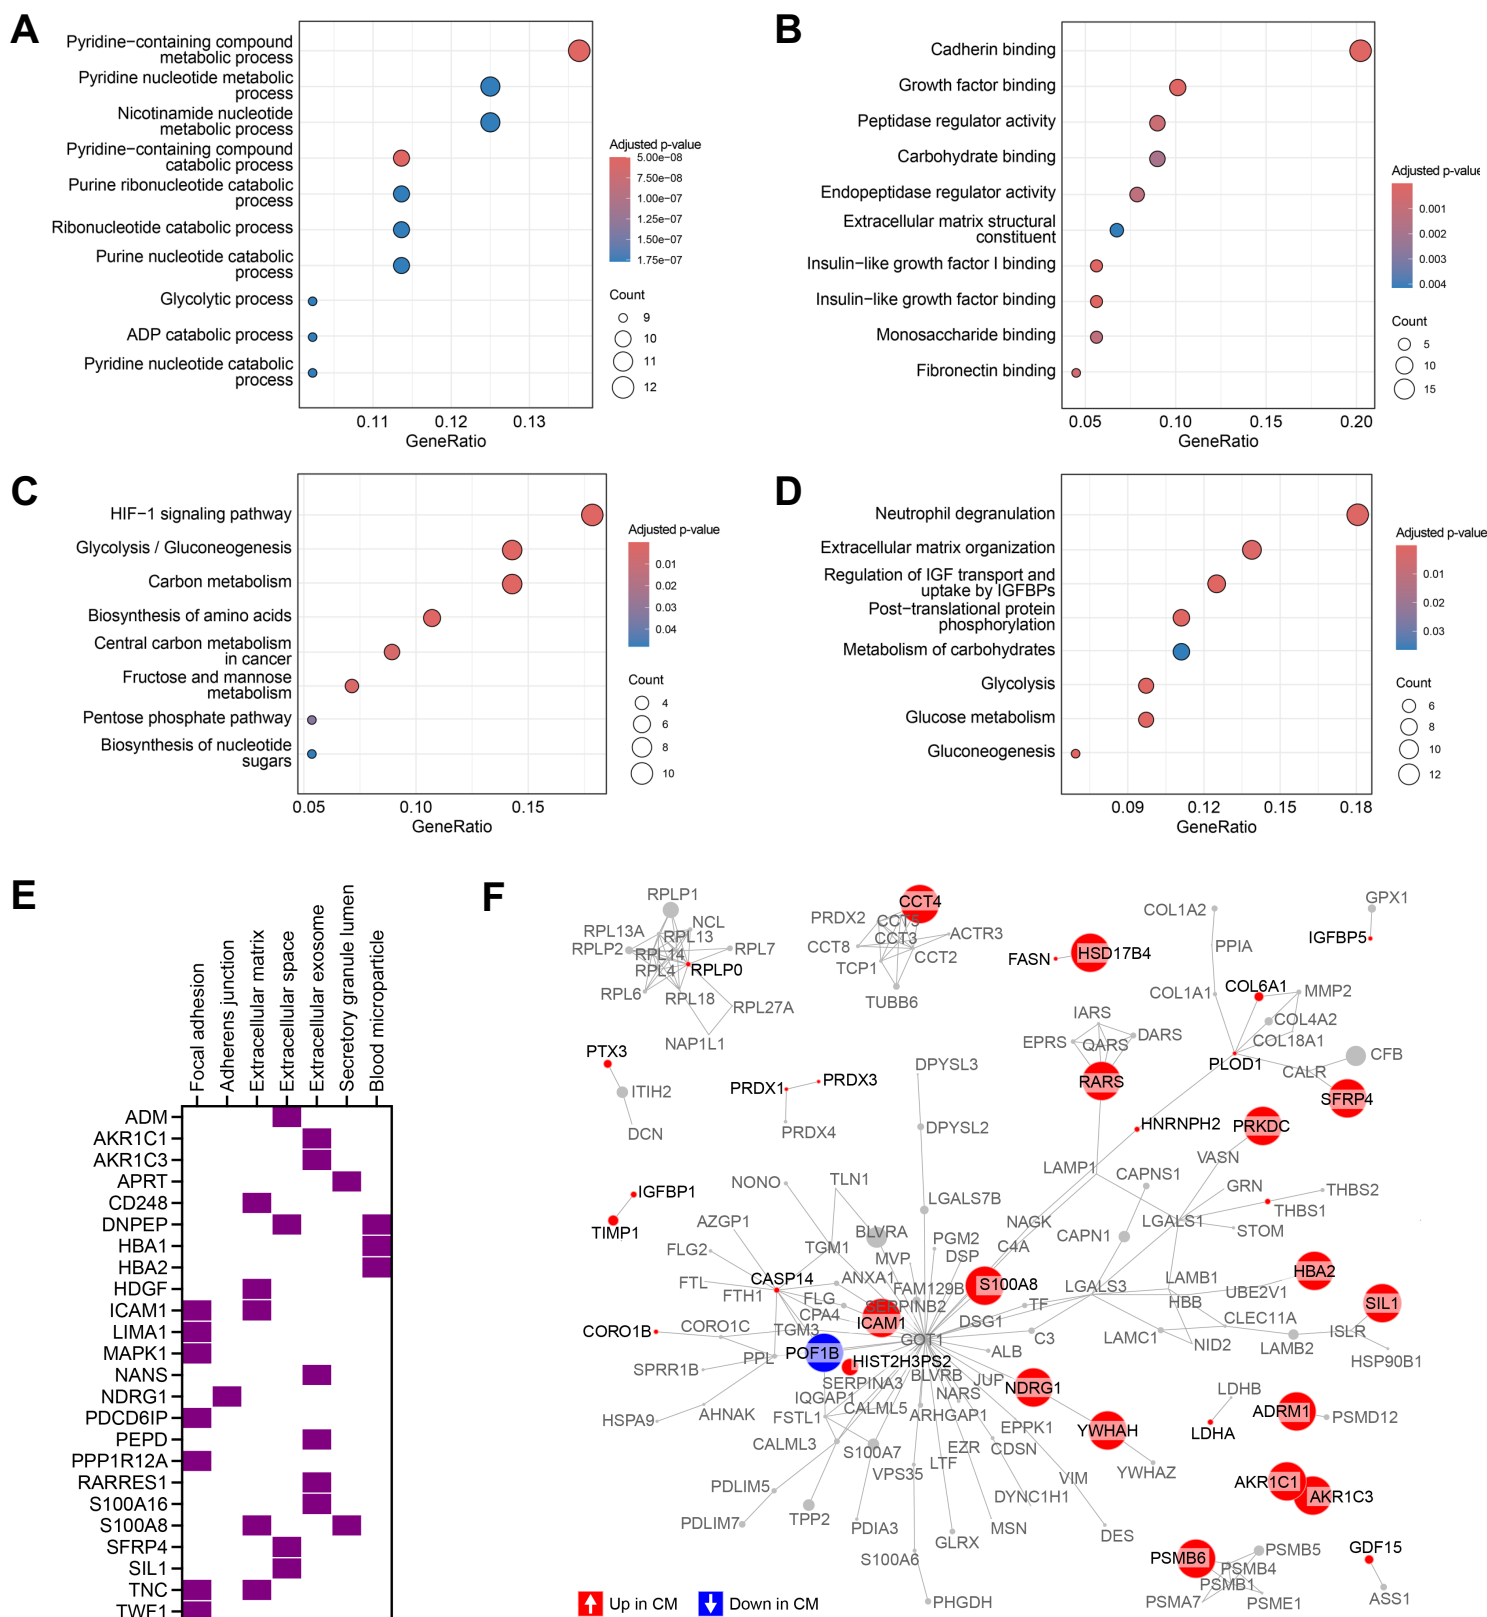

**Figure S7. Proteins enriched in conditioned media culture compared to co-culture.** (A-D) Enriched pathways (GO Biological Process, A; GO Molecular Function, B; KEGG, C; Reactome, D) for genes specifically upregulated or only present in CM compared to CC, Pre and Post combined (n=10 samples per condition). (E) Proteins with vesicle-related gene ontology (GO) cellular component (CC) annotations enriched or uniquely present in CM compared to CC, Pre and Post combined. (F) Protein-protein interaction diagram showing proteins upregulated or downregulated in CM, Pre and Post combined. Dot size indicates degree of enrichment; only statistically significant ( $p_{adj} < 0.01$ ) are colored. Lines connecting proteins represent predicted or experimentally validated interactions.

**Supplementary Table 1. Participant demographic and clinical information for samples utilized in this study.**

Abbreviations: CC, co-culture; CM, conditioned media; N, no; Y, yes.

| Deidentified ID | Anonymized | Age (years) | Tanner Stage | Group        | Diagnosis category   | Previous treatment | Sample type      | Experiments          |            |            |                      |              |
|-----------------|------------|-------------|--------------|--------------|----------------------|--------------------|------------------|----------------------|------------|------------|----------------------|--------------|
|                 |            |             |              |              |                      |                    |                  | 8-day CC (Fig 1, S1) | CM (Fig 2) | CM (Fig 3) | scRNA-seq (Fig 4, 5) | s (Fig 6, 7) |
| MLAR-Ov-0168    | A          | 0.34        | 1            | Prepubertal  | Other                | N                  | Punch biopsy     |                      |            |            | X                    |              |
| MLAR-Ov-0112    | B          | 0.87        | 1            | Prepubertal  | Rhabdoid/sarcoma     | N                  | Punch biopsy     |                      |            |            | X                    |              |
| MLAR-Ov-0175    | C          | 2.20        | 1            | Prepubertal  | Wilm's/neuroblastoma | N                  | Tissue fragments | X                    |            |            |                      |              |
| MLAR-Ov-0113    | D          | 2.73        | 1            | Prepubertal  | Brain/spine tumor    | N                  | Punch biopsy     |                      |            |            | X                    |              |
| MLAR-Ov-0063    | E          | 3.50        | 1            | Prepubertal  | Rhabdoid/sarcoma     | N                  | Cortical strip   |                      |            |            | X                    |              |
| MLAR-Ov-0164    | F          | 3.94        | 1            | Prepubertal  | Wilm's/neuroblastoma | Y                  | Tissue fragments | X                    |            |            |                      |              |
| MLAR-Ov-0142    | G          | 4.46        | 1            | Prepubertal  | Leukemia             | Y                  | Tissue fragments | X                    |            |            |                      |              |
| MLAR-Ov-0234    | H          | 4.51        | 1            | Prepubertal  | Rhabdoid/sarcoma     | N                  | Tissue fragments |                      | X          | X          |                      | X            |
| MLAR-Ov-0188    | I          | 6.36        | 1            | Prepubertal  | Rhabdoid/sarcoma     | N                  | Punch biopsy     |                      |            |            | X                    |              |
| MLAR-Ov-0214    | J          | 6.84        | 1            | Prepubertal  | Wilm's/neuroblastoma | Y                  | Tissue fragments | X                    |            |            |                      |              |
| MLAR-Ov-0243    | K          | 7.73        | 1            | Prepubertal  | Wilm's/neuroblastoma | Y                  | Tissue fragments |                      |            | X          |                      | X            |
| MLAR-Ov-0180    | L          | 8.41        | 1            | Prepubertal  | Rhabdoid/sarcoma     | N                  | Tissue fragments | X                    |            |            |                      |              |
| MLAR-Ov-0225    | M          | 8.87        | 1            | Prepubertal  | Rhabdoid/sarcoma     | N                  | Tissue fragments |                      | X          | X          |                      | X            |
| MLAR-Ov-0206    | T          | 12.30       | 1            | Prepubertal  | Brain/spine tumor    | Y                  | Tissue fragments | X                    |            |            |                      |              |
| MLAR-Ov-0199    | N          | 10.28       | 1            | Prepubertal  | Rhabdoid/sarcoma     | N                  | Tissue fragments |                      | X          | X          |                      | X            |
| MLAR-Ov-0223    | O          | 10.63       | 2            | Postpubertal | Rhabdoid/sarcoma     | N                  | Tissue fragments |                      | X          |            |                      |              |
| MLAR-Ov-0208    | P          | 10.70       | 2            | Postpubertal | Other                | Y                  | Tissue fragments | X                    |            |            |                      |              |
| MLAR-Ov-0219    | Q          | 11.51       | 2            | Postpubertal | Brain/spine tumor    | N                  | Tissue fragments |                      | X          |            |                      |              |
| MLAR-Ov-0212    | V          | 13.57       | 2            | Postpubertal | Leukemia             | Y                  | Tissue fragments | X                    |            |            |                      |              |
| MLAR-Ov-0182    | R          | 12.14       | 5            | Postpubertal | Rhabdoid/sarcoma     | N                  | Tissue fragments | X                    | X          |            |                      |              |
| MLAR-Ov-0238    | S          | 12.29       | 5            | Postpubertal | Non-oncologic        | N                  | Tissue fragments |                      | X          |            |                      |              |
| MLAR-Ov-0183    | U          | 13.40       | 5            | Postpubertal | Leukemia             | N                  | Tissue fragments | X                    |            | X          |                      | X            |
| MLAR-Ov-0129    | W          | 14.59       | 5            | Postpubertal | Leukemia             | N                  | Punch biopsy     |                      |            |            | X                    |              |
| MLAR-Ov-0104    | X          | 14.61       | 5            | Postpubertal | Brain/spine tumor    | N                  | Punch biopsy     |                      |            |            | X                    |              |
| MLAR-Ov-0100    | Y          | 14.84       | 5            | Postpubertal | Brain/spine tumor    | N                  | Punch biopsy     |                      |            |            | X                    |              |
| MLAR-Ov-0165    | Z          | 15.04       | 5            | Postpubertal | Rhabdoid/sarcoma     | N                  | Punch biopsy     |                      |            |            | X                    |              |
| MLAR-Ov-0207    | AA         | 15.18       | 5            | Postpubertal | Rhabdoid/sarcoma     | Y                  | Tissue fragments | X                    |            | X          |                      | X            |
| MLAR-Ov-0110    | BB         | 16.09       | 5            | Postpubertal | Non-oncologic        | N                  | Punch biopsy     |                      |            |            | X                    |              |
| MLAR-Ov-0244    | CC         | 17.81       | 5            | Postpubertal | Other                | N                  | Tissue fragments |                      |            | X          |                      | X            |
| MLAR-Ov-0213    | DD         | 18.34       | 5            | Postpubertal | Other                | N                  | Tissue fragments | X                    | X          |            |                      |              |
| MLAR-Ov-0250    | EE         | 19.93       | 5            | Postpubertal | Other                | N                  | Tissue fragments |                      |            | X          |                      | X            |
| MLAR-Ov-0150    | FF         | 21.17       | 5            | Postpubertal | Leukemia             | N                  | Tissue fragments |                      |            | X          |                      | X            |
| MLAR-Ov-0089    | GG         | 22.80       | 5            | Postpubertal | Rhabdoid/sarcoma     | N                  | Cortical strip   |                      |            |            | X                    |              |



**Supplementary Table 2A. Quality control and sample metrics for scRNA-seq.**

*Abbreviations: UMI, unique molecular identifier.*

| <b>Participant ID</b>            | <b>A</b> | <b>B</b> | <b>D</b> | <b>E</b> | <b>I</b> | <b>W</b> | <b>X</b> | <b>Y</b> | <b>Z</b> | <b>BB</b> | <b>GG</b> |
|----------------------------------|----------|----------|----------|----------|----------|----------|----------|----------|----------|-----------|-----------|
| <b>Age (years)</b>               | 0.34     | 0.87     | 2.73     | 3.5      | 6.36     | 14.59    | 14.61    | 14.84    | 15.04    | 16.09     | 22.8      |
| <b>Cells sequenced</b>           | 4,857    | 8,547    | 4,160    | 14,184   | 3,704    | 6,207    | 14,037   | 9,854    | 11,164   | 8,852     | 15,446    |
| <b>Median genes/cell</b>         | 1,701    | 1,439    | 1,148    | 1,206    | 1,900    | 787      | 1,261    | 2,471    | 1,598    | 1,753     | 1,191     |
| <b>Median UMI/cell</b>           | 3,230    | 2,933    | 2,264    | 2,489    | 3,922    | 1,290    | 2,590    | 6,523    | 3,584    | 4,764     | 2,406     |
| <b>Total pass-QC cells</b>       | 4,394    | 5,789    | 3,571    | 12,628   | 5,794    | 5,908    | 12,624   | 6,573    | 10,270   | 7,139     | 13,544    |
| <b>Oocytes</b>                   | 1,693    | 1,502    | 89       | 17       | 14       | 90       | 75       | 43       | 0        | 0         | 24        |
| <b>Granulosa</b>                 | 469      | 3,565    | 211      | 0        | 113      | 157      | 0        | 0        | 0        | 0         | 0         |
| <b>Theca/stromal</b>             | 1,610    | 554      | 2,815    | 11,537   | 705      | 2,803    | 9,714    | 4,862    | 6,041    | 5,134     | 12,237    |
| <b>Smooth muscle cells (SMC)</b> | 353      | 89       | 148      | 330      | 422      | 579      | 931      | 414      | 1,770    | 955       | 432       |
| <b>Vascular endothelial</b>      | 200      | 35       | 207      | 495      | 2,263    | 2,188    | 1,596    | 948      | 2,181    | 894       | 716       |
| <b>Lymphatic endothelial</b>     | 0        | 0        | 95       | 76       | 2,263    | 41       | 147      | 203      | 0        | 133       | 21        |
| <b>T cells</b>                   | 0        | 0        | 0        | 14       | 14       | 0        | 8        | 55       | 5        | 5         | 8         |
| <b>Myeloid</b>                   | 0        | 0        | 0        | 93       | 0        | 0        | 0        | 14       | 0        | 0         | 45        |
| <b>Neuronal</b>                  | 69       | 44       | 6        | 66       | 0        | 50       | 153      | 34       | 273      | 18        | 61        |

**Supplementary Table 2B. Top 10 differentially expressed genes for each cell cluster.**

*Abbreviations: Avg\_log2FC, average log2fold change; Pct.1, percentage of cells where the gene is detected in the identified cluster; Pct. 2, percentage of cells where the genes is detected on average in other clusters; p\_val\_adj, p-value adjusted for multiple comparisons; SMC, smooth muscle cell.*

| gene     | p_val | avg_log2FC | pct.1 | pct.2 | p_val_adj | cluster               |
|----------|-------|------------|-------|-------|-----------|-----------------------|
| VWF      | 0     | 4.15974195 | 0.862 | 0.046 | 0         | Vascular endothelial  |
| ARL15    | 0     | 3.74669237 | 0.526 | 0.08  | 0         | Vascular endothelial  |
| CCL14    | 0     | 3.67954294 | 0.543 | 0.022 | 0         | Vascular endothelial  |
| LDB2     | 0     | 3.62239558 | 0.745 | 0.119 | 0         | Vascular endothelial  |
| MECOM    | 0     | 3.3386846  | 0.586 | 0.009 | 0         | Vascular endothelial  |
| LIFR     | 0     | 3.25224451 | 0.718 | 0.154 | 0         | Vascular endothelial  |
| EGFL7    | 0     | 3.09872998 | 0.766 | 0.058 | 0         | Vascular endothelial  |
| CD74     | 0     | 3.04698774 | 0.699 | 0.118 | 0         | Vascular endothelial  |
| CLDN5    | 0     | 3.00114909 | 0.622 | 0.025 | 0         | Vascular endothelial  |
| A2M      | 0     | 2.97484808 | 0.819 | 0.156 | 0         | Vascular endothelial  |
| PTGDS    | 0     | 3.99176301 | 0.887 | 0.059 | 0         | Granulosa             |
| NPY      | 0     | 3.64580157 | 0.793 | 0.01  | 0         | Granulosa             |
| GATM     | 0     | 2.64069706 | 0.888 | 0.163 | 0         | Granulosa             |
| PRXL2A   | 0     | 2.48966418 | 0.829 | 0.13  | 0         | Granulosa             |
| ISYNA1   | 0     | 2.40823311 | 0.873 | 0.181 | 0         | Granulosa             |
| BEX1     | 0     | 2.31711768 | 0.74  | 0.029 | 0         | Granulosa             |
| WNT6     | 0     | 2.26772914 | 0.737 | 0.019 | 0         | Granulosa             |
| KRT18    | 0     | 2.26363216 | 0.73  | 0.045 | 0         | Granulosa             |
| MIR202HG | 0     | 2.22228511 | 0.716 | 0.053 | 0         | Granulosa             |
| ANGPTL6  | 0     | 2.21130907 | 0.7   | 0.009 | 0         | Granulosa             |
| CCL21    | 0     | 5.31388092 | 0.79  | 0.015 | 0         | Lymphatic endothelial |
| MMRN1    | 0     | 4.6073703  | 0.839 | 0.033 | 0         | Lymphatic endothelial |
| FABP4    | 0     | 4.50759595 | 0.603 | 0.015 | 0         | Lymphatic endothelial |
| TFPI     | 0     | 4.00489829 | 0.876 | 0.166 | 0         | Lymphatic endothelial |
| TFF3     | 0     | 4.00385137 | 0.728 | 0.018 | 0         | Lymphatic endothelial |
| FABP5    | 0     | 3.68693085 | 0.629 | 0.108 | 0         | Lymphatic endothelial |
| PKHD1L1  | 0     | 3.33971719 | 0.523 | 0.003 | 0         | Lymphatic endothelial |
| PROX1    | 0     | 3.24766356 | 0.68  | 0.052 | 0         | Lymphatic endothelial |
| RELN     | 0     | 3.04206909 | 0.554 | 0.034 | 0         | Lymphatic endothelial |
| ANGPT2   | 0     | 2.95239642 | 0.512 | 0.067 | 0         | Lymphatic endothelial |
| C1QA     | 0     | 4.23281782 | 0.599 | 0.004 | 0         | Myeloid               |
| AIF1     | 0     | 3.80795624 | 0.572 | 0.003 | 0         | Myeloid               |
| C1QB     | 0     | 3.72667595 | 0.559 | 0.003 | 0         | Myeloid               |
| F13A1    | 0     | 3.70857434 | 0.546 | 0.014 | 0         | Myeloid               |
| TYROBP   | 0     | 3.24886059 | 0.513 | 0.002 | 0         | Myeloid               |
| C1QC     | 0     | 2.97621974 | 0.408 | 0.001 | 0         | Myeloid               |
| FCER1G   | 0     | 2.73184139 | 0.395 | 0.002 | 0         | Myeloid               |
| MS4A6A   | 0     | 2.51241947 | 0.362 | 0.002 | 0         | Myeloid               |
| FOLR2    | 0     | 2.40153811 | 0.342 | 0.001 | 0         | Myeloid               |

|            |   |            |       |       |   |               |
|------------|---|------------|-------|-------|---|---------------|
| CYBB       | 0 | 2.26663336 | 0.342 | 0.001 | 0 | Myeloid       |
| NRXN1      | 0 | 6.22239552 | 0.951 | 0.021 | 0 | Neuronal      |
| XKR4       | 0 | 4.7691508  | 0.714 | 0.003 | 0 | Neuronal      |
| CDH19      | 0 | 4.71857185 | 0.853 | 0.004 | 0 | Neuronal      |
| CRYAB      | 0 | 4.20241887 | 0.779 | 0.137 | 0 | Neuronal      |
| ADGRB3     | 0 | 4.15332905 | 0.63  | 0.033 | 0 | Neuronal      |
| GPM6B      | 0 | 4.15249444 | 0.848 | 0.071 | 0 | Neuronal      |
| CADM2      | 0 | 4.14915242 | 0.601 | 0.015 | 0 | Neuronal      |
| S100B      | 0 | 4.09979543 | 0.695 | 0.012 | 0 | Neuronal      |
| NRXN3      | 0 | 3.99088693 | 0.583 | 0.016 | 0 | Neuronal      |
| GRIK2      | 0 | 3.58527583 | 0.491 | 0.034 | 0 | Neuronal      |
| PDCD5      | 0 | 4.71335143 | 0.988 | 0.332 | 0 | Oocytes       |
| ZFAND2A    | 0 | 4.60272967 | 0.95  | 0.092 | 0 | Oocytes       |
| ZP3        | 0 | 4.306322   | 0.888 | 0.032 | 0 | Oocytes       |
| TUBB8      | 0 | 4.3015879  | 0.899 | 0.032 | 0 | Oocytes       |
| UCHL1      | 0 | 3.84847749 | 0.914 | 0.125 | 0 | Oocytes       |
| FIGLA      | 0 | 3.75616846 | 0.855 | 0.02  | 0 | Oocytes       |
| AL033523.1 | 0 | 3.68872196 | 0.659 | 0.019 | 0 | Oocytes       |
| STAG3      | 0 | 3.51864585 | 0.862 | 0.037 | 0 | Oocytes       |
| PADI6      | 0 | 3.47785927 | 0.885 | 0.029 | 0 | Oocytes       |
| KCNQ1-AS1  | 0 | 3.4304321  | 0.855 | 0.022 | 0 | Oocytes       |
| CRIP1      | 0 | 3.97735855 | 0.754 | 0.04  | 0 | SMC           |
| RERGL      | 0 | 3.4724509  | 0.585 | 0.021 | 0 | SMC           |
| PRKG1      | 0 | 3.44072141 | 0.7   | 0.12  | 0 | SMC           |
| MUSTN1     | 0 | 3.24937905 | 0.65  | 0.018 | 0 | SMC           |
| ADIRF      | 0 | 3.02732635 | 0.887 | 0.456 | 0 | SMC           |
| RGS5       | 0 | 2.89586104 | 0.475 | 0.032 | 0 | SMC           |
| TAGLN      | 0 | 2.73665842 | 0.891 | 0.432 | 0 | SMC           |
| PLN        | 0 | 2.72092289 | 0.586 | 0.023 | 0 | SMC           |
| ACTA2      | 0 | 2.64337332 | 0.885 | 0.354 | 0 | SMC           |
| S100A4     | 0 | 2.51040575 | 0.455 | 0.023 | 0 | SMC           |
| CCL5       | 0 | 4.25255375 | 0.725 | 0.002 | 0 | T cells       |
| CCL4       | 0 | 4.23910239 | 0.33  | 0.001 | 0 | T cells       |
| IL7R       | 0 | 4.07631438 | 0.651 | 0.002 | 0 | T cells       |
| CD69       | 0 | 3.87248766 | 0.651 | 0     | 0 | T cells       |
| PTPRC      | 0 | 3.60417512 | 0.743 | 0.001 | 0 | T cells       |
| CD2        | 0 | 3.39402755 | 0.725 | 0     | 0 | T cells       |
| KLRB1      | 0 | 3.20402288 | 0.532 | 0     | 0 | T cells       |
| CXCR4      | 0 | 3.17882046 | 0.688 | 0.011 | 0 | T cells       |
| CD52       | 0 | 3.14045787 | 0.596 | 0.003 | 0 | T cells       |
| LTB        | 0 | 2.81969127 | 0.404 | 0.001 | 0 | T cells       |
| DCN        | 0 | 3.22981512 | 0.942 | 0.312 | 0 | Theca/stromal |
| C7         | 0 | 2.45033861 | 0.585 | 0.128 | 0 | Theca/stromal |
| OGN        | 0 | 2.38401287 | 0.642 | 0.085 | 0 | Theca/stromal |
| MEG3       | 0 | 2.31269255 | 0.5   | 0.114 | 0 | Theca/stromal |

|        |   |            |       |       |   |               |
|--------|---|------------|-------|-------|---|---------------|
| COL1A1 | 0 | 2.27813066 | 0.673 | 0.19  | 0 | Theca/stromal |
| PDGFRA | 0 | 2.17947888 | 0.591 | 0.066 | 0 | Theca/stromal |
| COL1A2 | 0 | 2.14401641 | 0.724 | 0.236 | 0 | Theca/stromal |
| C1R    | 0 | 2.01957833 | 0.628 | 0.171 | 0 | Theca/stromal |
| C1S    | 0 | 2.00597846 | 0.622 | 0.156 | 0 | Theca/stromal |
| PEG3   | 0 | 1.97103131 | 0.711 | 0.229 | 0 | Theca/stromal |

**Supplementary Table 4C. Predicted source for CM- and CC-enriched or unique proteins for all samples (Pre and Post combined).**

*Abbreviations: CC, co-culture; CM, conditioned media; D0, [experimental] day 0; D7, [experimental] day 7; Pre, prepubertal; Post, postpubertal; SMC, smooth muscle cell.*

*'N/A' in 'Predicted source' column indicates the corresponding transcript was detected at extremely low levels in all interstitial cell types.*

| <b>ProtName</b> | <b>Gene symbol(s)</b> | <b>Classification</b> | <b>Predicted source</b> |
|-----------------|-----------------------|-----------------------|-------------------------|
| ADML            | ADM                   | Only in CM            | Lymphatic endothelial   |
| AKA12           | AKAP12                | Only in CM            | Lymphatic endothelial   |
| BGAL            | GLB1                  | Up in CM              | Lymphatic endothelial   |
| MK01            | MAPK1                 | Only in CM            | Lymphatic endothelial   |
| EFNMT           | METTL13               | Up in CC              | Lymphatic endothelial   |
| NDRG1           | NDRG1                 | Only in CM            | Lymphatic endothelial   |
| NNMT            | NNMT                  | Only in CM            | Lymphatic endothelial   |
| PDC6I           | PDCD6IP               | Only in CM            | Lymphatic endothelial   |
| PEPD            | PEPD                  | Only in CM            | Lymphatic endothelial   |
| PTX3            | PTX3                  | Up in CM              | Lymphatic endothelial   |
| PXDN            | PXDN                  | Up in CM              | Lymphatic endothelial   |
| S10AG           | S100A16               | Only in CM            | Lymphatic endothelial   |
| SEPT9           | SEPTIN9               | Only in CM            | Lymphatic endothelial   |
| TPD54           | TPD52L2               | Only in CM            | Lymphatic endothelial   |
| ACPH            | APEH                  | Up in CM              | Myeloid                 |
| FRIH            | FTH1                  | Up in CM              | Myeloid                 |
| S10AB           | S100A11               | Up in CM              | Myeloid                 |
| S10A8           | S100A8                | Only in CM            | Myeloid                 |
| DDTL            | DDTL                  | Up in CM              | N/A                     |
| GDF15           | GDF15                 | Up in CM              | N/A                     |
| IBP1            | IGFBP1                | Up in CM              | N/A                     |
| K22O            | KRT76                 | Only in CC            | N/A                     |
| MXRA5           | MXRA5                 | Up in CM              | N/A                     |
| POF1B           | POF1B                 | Only in CC            | N/A                     |
| S10A7           | S100A7                | Up in CM              | N/A                     |
| SBSN            | SBSN                  | Up in CM              | N/A                     |
| SPB12           | SERPINB12             | Up in CC              | N/A                     |
| STC2            | STC2                  | Up in CM              | N/A                     |
| PDLI4           | PDLIM4                | Only in CM            | Neuronal                |
| PRIO            | PRNP                  | Up in CM              | Neuronal                |
| TIG1            | RARRES1               | Only in CM            | Neuronal                |
| ALDOA           | ALDOA                 | Up in CM              | SMC                     |
| THOC4           | ALYREF                | Up in CM              | SMC                     |
| RHG01           | ARHGAP1               | Up in CC              | SMC                     |
| PUR9            | ATIC                  | Up in CM              | SMC                     |
| BMP1            | BMP1                  | Up in CM              | SMC                     |



|       |            |            |                      |
|-------|------------|------------|----------------------|
| CBR1  | CBR1       | Up in CM   | SMC                  |
| TCPD  | CCT4       | Only in CM | SMC                  |
| CD248 | CD248      | Only in CM | SMC                  |
| CLIC1 | CLIC1      | Up in CM   | SMC                  |
| DCTN2 | DCTN2      | Only in CM | SMC                  |
| DNPEP | DNPEP      | Only in CM | SMC                  |
| G3P   | GAPDH      | Up in CM   | SMC                  |
| G6PI  | GPI        | Up in CM   | SMC                  |
| HDGF  | HDGF       | Only in CM | SMC                  |
| HNRH2 | HNRNPH2    | Up in CM   | SMC                  |
| KTN1  | KTN1       | Only in CM | SMC                  |
| MIF   | MIF        | Up in CM   | SMC                  |
| MT2   | MT2A       | Up in CM   | SMC                  |
| MYPT1 | PPP1R12A   | Only in CM | SMC                  |
| PRDX1 | PRDX1      | Up in CM   | SMC                  |
| PRDX3 | PRDX3      | Up in CM   | SMC                  |
| PSB6  | PSMB6      | Only in CM | SMC                  |
| SARNP | SARNP      | Only in CM | SMC                  |
| TSP1  | THBS1      | Up in CM   | SMC                  |
| TENA  | TNC        | Only in CM | SMC                  |
| TPIS  | TPI1       | Up in CM   | SMC                  |
| 1433F | YWHAH      | Only in CM | SMC                  |
| COR1B | CORO1B     | Up in CM   | T cells              |
| PNPH  | PNP        | Up in CM   | T cells              |
| CO6A1 | COL6A1     | Up in CM   | Theca/stromal        |
| EF2   | EEF2       | Up in CM   | Theca/stromal        |
| ENOA  | ENO1       | Up in CM   | Theca/stromal        |
| FBLN1 | FBLN1      | Up in CM   | Theca/stromal        |
| H37   | H3-7       | Up in CM   | Theca/stromal        |
| HBA   | HBA1; HBA2 | Only in CM | Theca/stromal        |
| IDHC  | IDH1       | Up in CM   | Theca/stromal        |
| IBP2  | IGFBP2     | Up in CM   | Theca/stromal        |
| IBP5  | IGFBP5     | Up in CM   | Theca/stromal        |
| P4HA1 | P4HA1      | Only in CM | Theca/stromal        |
| PA2GA | PLA2G2A    | Only in CM | Theca/stromal        |
| PLIN3 | PLIN3      | Only in CM | Theca/stromal        |
| PLOD1 | PLOD1      | Up in CM   | Theca/stromal        |
| RLA0  | RPLP0      | Up in CM   | Theca/stromal        |
| PAI1  | SERPINE1   | Up in CM   | Theca/stromal        |
| SFRP4 | SFRP4      | Only in CM | Theca/stromal        |
| TFR1  | TFRC       | Up in CM   | Theca/stromal        |
| TIMP1 | TIMP1      | Up in CM   | Theca/stromal        |
| ADRM1 | ADRM1      | Only in CM | Vascular endothelial |
| AK1C1 | AKR1C1     | Only in CM | Vascular endothelial |
| APT   | APRT       | Only in CM | Vascular endothelial |

|       |         |            |                      |
|-------|---------|------------|----------------------|
| GDIR1 | ARHGDIA | Up in CM   | Vascular endothelial |
| AT1A1 | ATP1A1  | Only in CM | Vascular endothelial |
| B2MG  | B2M     | Up in CM   | Vascular endothelial |
| CLUS  | CLU     | Up in CM   | Vascular endothelial |
| COPA  | COPA    | Up in CM   | Vascular endothelial |
| DHX9  | DHX9    | Only in CM | Vascular endothelial |
| FAS   | FASN    | Up in CM   | Vascular endothelial |
| GLGB  | GBE1    | Up in CM   | Vascular endothelial |
| GDI2  | GDI2    | Up in CM   | Vascular endothelial |
| HXK1  | HK1     | Only in CM | Vascular endothelial |
| DHB4  | HSD17B4 | Only in CM | Vascular endothelial |
| ICAM1 | ICAM1   | Only in CM | Vascular endothelial |
| IBP3  | IGFBP3  | Up in CM   | Vascular endothelial |
| IBP4  | IGFBP4  | Up in CM   | Vascular endothelial |
| ISG15 | ISG15   | Up in CM   | Vascular endothelial |
| LDHA  | LDHA    | Up in CM   | Vascular endothelial |
| LIMA1 | LIMA1   | Only in CM | Vascular endothelial |
| MACF1 | MACF1   | Only in CM | Vascular endothelial |
| MGP   | MGP     | Up in CM   | Vascular endothelial |
| SIAS  | NANS    | Only in CM | Vascular endothelial |
| NRDC  | NRDC    | Only in CM | Vascular endothelial |
| PFKAP | PFKP    | Up in CM   | Vascular endothelial |
| PRKDC | PRKDC   | Only in CM | Vascular endothelial |
| SYRC  | RARS1   | Only in CM | Vascular endothelial |
| SIL1  | SIL1    | Only in CM | Vascular endothelial |
| TFG   | TFG     | Only in CM | Vascular endothelial |
| TWF1  | TWF1    | Only in CM | Vascular endothelial |

**Supplementary Table 5. Antibodies used for immunocytochemistry.**

| <b>Target</b>               | <b>Supplier</b>           | <b>Catalog Number</b> | <b>RRID</b> | <b>Dilution</b> |
|-----------------------------|---------------------------|-----------------------|-------------|-----------------|
| ACTA2 (SMA)                 | Sigma-Aldrich             | A5228                 | AB_262054   | 1:200           |
| APOC1                       | Abcam                     | ab198288              | AB_3698448  | 1:200           |
| DDX4                        | Abcam                     | ab27591               | AB_11139638 | 1:200           |
| FOXL2                       | Abcam                     | ab246511              | AB_2895602  | 1:200           |
| HMGB1                       | Abcam                     | ab18256               | AB_444360   | 1:200           |
| NR2F2 (COUPTFII)            | R&D Systems               | PPH714700             | AB_2155627  | 1:200           |
| SERPINE2                    | Proteintech               | 66203-1-IG            | AB_2881594  | 1:400           |
| TUBA1B ( $\alpha$ -tubulin) | Cell Signaling Technology | 8058S                 | AB_10860077 | 1:50            |
| VWF                         | Abcam                     | ab154193              | AB_3094475  | 1:200           |
| Mouse IgG-AF488             | Thermo Fisher             | A21202                | AB_141607   | 1:500           |
| Rabbit IgG-AF488            | Thermo Fisher             | A21206                | AB_2535792  | 1:500           |
| Mouse IgG-AF568             | Thermo Fisher             | A10037                | AB_11180865 | 1:500           |
| Rabbit IgG-AF568            | Thermo Fisher             | A10042                | AB_2534017  | 1:500           |
