# Supplementary material for: Primary human ovarian interstitial cells contribute to murine follicle growth through follicle-interstitial paracrine crosstalk
Source: Research Square preprint supplement (doi:10.21203/rs.3.rs-7593401/v1), 2025-09-24
Supplement: Supplementary file 1 [file Supplementary Table 1.xlsx]

## Sheet: S1_participants
Supplementary Table 1. Participant demographic and clinical information for samples utilized in this study.
Abbreviations: CC, co-culture; CM, conditioned media; N, no; Y, yes.
								Experiments
Deidentified ID	Anon-ymized	Age (years)	Tanner Stage	Group	Diagnosis category	Previous treatment	Sample type	8-day CC (Fig 1, S1)	8-day CC, CM (Fig 2)	6-day CC, CM (Fig 3)	scRNA-seq (Fig 4, 5)	Proteomics (Fig 6, 7)
MLAR-Ov-0168	A	0.34	1	Prepubertal	Other	N	Punch biopsy				X
MLAR-Ov-0112	B	0.87	1	Prepubertal	Rhabdoid/sarcoma	N	Punch biopsy				X
MLAR-Ov-0175	C	2.2	1	Prepubertal	Wilm's/neuroblastoma	N	Tissue fragments	X
MLAR-Ov-0113	D	2.73	1	Prepubertal	Brain/spine tumor	N	Punch biopsy				X
MLAR-Ov-0063	E	3.5	1	Prepubertal	Rhabdoid/sarcoma	N	Cortical strip				X
MLAR-Ov-0164	F	3.94	1	Prepubertal	Wilm's/neuroblastoma	Y	Tissue fragments	X
MLAR-Ov-0142	G	4.46	1	Prepubertal	Leukemia	Y	Tissue fragments	X
MLAR-Ov-0234	H	4.51	1	Prepubertal	Rhabdoid/sarcoma	N	Tissue fragments		X	X		X
MLAR-Ov-0188	I	6.36	1	Prepubertal	Rhabdoid/sarcoma	N	Punch biopsy				X
MLAR-Ov-0214	J	6.84	1	Prepubertal	Wilm's/neuroblastoma	Y	Tissue fragments	X
MLAR-Ov-0243	K	7.73	1	Prepubertal	Wilm's/neuroblastoma	Y	Tissue fragments			X		X
MLAR-Ov-0180	L	8.41	1	Prepubertal	Rhabdoid/sarcoma	N	Tissue fragments	X
MLAR-Ov-0225	M	8.87	1	Prepubertal	Rhabdoid/sarcoma	N	Tissue fragments		X	X		X
MLAR-Ov-0206	T	12.3	1	Prepubertal	Brain/spine tumor	Y	Tissue fragments	X
MLAR-Ov-0199	N	10.28	1	Prepubertal	Rhabdoid/sarcoma	N	Tissue fragments		X	X		X
MLAR-Ov-0223	O	10.63	2	Postpubertal	Rhabdoid/sarcoma	N	Tissue fragments		X
MLAR-Ov-0208	P	10.7	2	Postpubertal	Other	Y	Tissue fragments	X
MLAR-Ov-0219	Q	11.51	2	Postpubertal	Brain/spine tumor	N	Tissue fragments		X
MLAR-Ov-0212	V	13.57	2	Postpubertal	Leukemia	Y	Tissue fragments	X
MLAR-Ov-0182	R	12.14	5	Postpubertal	Rhabdoid/sarcoma	N	Tissue fragments	X	X
MLAR-Ov-0238	S	12.29	5	Postpubertal	Non-oncologic	N	Tissue fragments		X
MLAR-Ov-0183	U	13.4	5	Postpubertal	Leukemia	N	Tissue fragments	X		X		X
MLAR-Ov-0129	W	14.59	5	Postpubertal	Leukemia	N	Punch biopsy				X
MLAR-Ov-0104	X	14.61	5	Postpubertal	Brain/spine tumor	N	Punch biopsy				X
MLAR-Ov-0100	Y	14.84	5	Postpubertal	Brain/spine tumor	N	Punch biopsy				X
MLAR-Ov-0165	Z	15.04	5	Postpubertal	Rhabdoid/sarcoma	N	Punch biopsy				X
MLAR-Ov-0207	AA	15.18	5	Postpubertal	Rhabdoid/sarcoma	Y	Tissue fragments	X		X		X
MLAR-Ov-0110	BB	16.09	5	Postpubertal	Non-oncologic	N	Punch biopsy				X
MLAR-Ov-0244	CC	17.81	5	Postpubertal	Other	N	Tissue fragments			X		X
MLAR-Ov-0213	DD	18.34	5	Postpubertal	Other	N	Tissue fragments	X	X
MLAR-Ov-0250	EE	19.93	5	Postpubertal	Other	N	Tissue fragments			X		X
MLAR-Ov-0150	FF	21.17	5	Postpubertal	Leukemia	N	Tissue fragments			X		X
MLAR-Ov-0089	GG	22.8	5	Postpubertal	Rhabdoid/sarcoma	N	Cortical strip				X
