# Supplementary material for: Primary human ovarian interstitial cells contribute to murine follicle growth through follicle-interstitial paracrine crosstalk
Source: Research Square preprint supplement (doi:10.21203/rs.3.rs-7593401/v1), 2025-09-24
Supplement: Supplementary file 5 [file Supplementary Table 2.xlsx]

## Sheet: 2A_QC
Supplementary Table 2A. Quality control and sample metrics for scRNA-seq.
Abbreviations: UMI, unique molecular identifier.
Participant ID	A	B	D	E	I	W	X	Y	Z	BB	GG
Age (years)	0.34	0.87	2.73	3.5	6.36	14.59	14.61	14.84	15.04	16.09	22.8
Cells sequenced	4857	8547	4160	14,184​	3,704​	6207	14037	9854	11164	8852	15,446​
Median genes/cell	1701	1439	1148	1,206​	1,900​	787	1261	2471	1598	1753	1,191​
Median UMI/cell	3230	2933	2264	2489	3922	1290	2590	6523	3584	4764	2406
Total pass-QC cells	4394	5789	3571	12628	5794	5908	12624	6573	10270	7139	13544
Oocytes	1693	1502	89	17	14	90	75	43	0	0	24
Granulosa	469	3565	211	0	113	157	0	0	0	0	0
Theca/stromal	1610	554	2815	11537	705	2803	9714	4862	6041	5134	12237
Smooth muscle cells (SMC)	353	89	148	330	422	579	931	414	1770	955	432
Vascular endothelial	200	35	207	495	2263	2188	1596	948	2181	894	716
Lymphatic endothelial	0	0	95	76	2263	41	147	203	0	133	21
T cells	0	0	0	14	14	0	8	55	5	5	8
Myeloid	0	0	0	93	0	0	0	14	0	0	45
Neuronal	69	44	6	66	0	50	153	34	273	18	61

## Sheet: 2B_cell clusters
Supplementary Table 2B. Top 10 differentially expressed genes for each cell cluster.
Abbreviations: Avg_log2FC, average log2fold change; Pct.1, percentage of cells where the gene is detected in the identified cluster; Pct. 2, percentage of cells where the genes is dectected on average in other clusters; p_val_adj, p-value adjusted for multiple comparisons; SMC, smooth muscle cell.
gene	p_val	avg_log2FC	pct.1	pct.2	p_val_adj	cluster
VWF	0	4.15974	0.862	0.046	0	Vascular endothelial
ARL15	0	3.74669	0.526	0.08	0	Vascular endothelial
CCL14	0	3.67954	0.543	0.022	0	Vascular endothelial
LDB2	0	3.6224	0.745	0.119	0	Vascular endothelial
MECOM	0	3.33868	0.586	0.009	0	Vascular endothelial
LIFR	0	3.25224	0.718	0.154	0	Vascular endothelial
EGFL7	0	3.09873	0.766	0.058	0	Vascular endothelial
CD74	0	3.04699	0.699	0.118	0	Vascular endothelial
CLDN5	0	3.00115	0.622	0.025	0	Vascular endothelial
A2M	0	2.97485	0.819	0.156	0	Vascular endothelial
PTGDS	0	3.99176	0.887	0.059	0	Granulosa
NPY	0	3.6458	0.793	0.01	0	Granulosa
GATM	0	2.6407	0.888	0.163	0	Granulosa
PRXL2A	0	2.48966	0.829	0.13	0	Granulosa
ISYNA1	0	2.40823	0.873	0.181	0	Granulosa
BEX1	0	2.31712	0.74	0.029	0	Granulosa
WNT6	0	2.26773	0.737	0.019	0	Granulosa
KRT18	0	2.26363	0.73	0.045	0	Granulosa
MIR202HG	0	2.22229	0.716	0.053	0	Granulosa
ANGPTL6	0	2.21131	0.7	0.009	0	Granulosa
CCL21	0	5.31388	0.79	0.015	0	Lymphatic endothelial
MMRN1	0	4.60737	0.839	0.033	0	Lymphatic endothelial
FABP4	0	4.5076	0.603	0.015	0	Lymphatic endothelial
TFPI	0	4.0049	0.876	0.166	0	Lymphatic endothelial
TFF3	0	4.00385	0.728	0.018	0	Lymphatic endothelial
FABP5	0	3.68693	0.629	0.108	0	Lymphatic endothelial
PKHD1L1	0	3.33972	0.523	0.003	0	Lymphatic endothelial
PROX1	0	3.24766	0.68	0.052	0	Lymphatic endothelial
RELN	0	3.04207	0.554	0.034	0	Lymphatic endothelial
ANGPT2	0	2.9524	0.512	0.067	0	Lymphatic endothelial
C1QA	0	4.23282	0.599	0.004	0	Myeloid
AIF1	0	3.80796	0.572	0.003	0	Myeloid
C1QB	0	3.72668	0.559	0.003	0	Myeloid
F13A1	0	3.70857	0.546	0.014	0	Myeloid
TYROBP	0	3.24886	0.513	0.002	0	Myeloid
C1QC	0	2.97622	0.408	0.001	0	Myeloid
FCER1G	0	2.73184	0.395	0.002	0	Myeloid
MS4A6A	0	2.51242	0.362	0.002	0	Myeloid
FOLR2	0	2.40154	0.342	0.001	0	Myeloid
CYBB	0	2.26663	0.342	0.001	0	Myeloid
NRXN1	0	6.2224	0.951	0.021	0	Neuronal
XKR4	0	4.76915	0.714	0.003	0	Neuronal
CDH19	0	4.71857	0.853	0.004	0	Neuronal
CRYAB	0	4.20242	0.779	0.137	0	Neuronal
ADGRB3	0	4.15333	0.63	0.033	0	Neuronal
GPM6B	0	4.15249	0.848	0.071	0	Neuronal
CADM2	0	4.14915	0.601	0.015	0	Neuronal
S100B	0	4.0998	0.695	0.012	0	Neuronal
NRXN3	0	3.99089	0.583	0.016	0	Neuronal
GRIK2	0	3.58528	0.491	0.034	0	Neuronal
PDCD5	0	4.71335	0.988	0.332	0	Oocytes
ZFAND2A	0	4.60273	0.95	0.092	0	Oocytes
ZP3	0	4.30632	0.888	0.032	0	Oocytes
TUBB8	0	4.30159	0.899	0.032	0	Oocytes
UCHL1	0	3.84848	0.914	0.125	0	Oocytes
FIGLA	0	3.75617	0.855	0.02	0	Oocytes
AL033523.1	0	3.68872	0.659	0.019	0	Oocytes
STAG3	0	3.51865	0.862	0.037	0	Oocytes
PADI6	0	3.47786	0.885	0.029	0	Oocytes
KCNQ1-AS1	0	3.43043	0.855	0.022	0	Oocytes
CRIP1	0	3.97736	0.754	0.04	0	SMC
RERGL	0	3.47245	0.585	0.021	0	SMC
PRKG1	0	3.44072	0.7	0.12	0	SMC
MUSTN1	0	3.24938	0.65	0.018	0	SMC
ADIRF	0	3.02733	0.887	0.456	0	SMC
RGS5	0	2.89586	0.475	0.032	0	SMC
TAGLN	0	2.73666	0.891	0.432	0	SMC
PLN	0	2.72092	0.586	0.023	0	SMC
ACTA2	0	2.64337	0.885	0.354	0	SMC
S100A4	0	2.51041	0.455	0.023	0	SMC
CCL5	0	4.25255	0.725	0.002	0	T cells
CCL4	0	4.2391	0.33	0.001	0	T cells
IL7R	0	4.07631	0.651	0.002	0	T cells
CD69	0	3.87249	0.651	0	0	T cells
PTPRC	0	3.60418	0.743	0.001	0	T cells
CD2	0	3.39403	0.725	0	0	T cells
KLRB1	0	3.20402	0.532	0	0	T cells
CXCR4	0	3.17882	0.688	0.011	0	T cells
CD52	0	3.14046	0.596	0.003	0	T cells
LTB	0	2.81969	0.404	0.001	0	T cells
DCN	0	3.22982	0.942	0.312	0	Theca/stromal
C7	0	2.45034	0.585	0.128	0	Theca/stromal
OGN	0	2.38401	0.642	0.085	0	Theca/stromal
MEG3	0	2.31269	0.5	0.114	0	Theca/stromal
COL1A1	0	2.27813	0.673	0.19	0	Theca/stromal
PDGFRA	0	2.17948	0.591	0.066	0	Theca/stromal
COL1A2	0	2.14402	0.724	0.236	0	Theca/stromal
C1R	0	2.01958	0.628	0.171	0	Theca/stromal
C1S	0	2.00598	0.622	0.156	0	Theca/stromal
PEG3	0	1.97103	0.711	0.229	0	Theca/stromal

## Sheet: 2C_theca-stromal pre-post
Supplementary Table 2C. Differentially expressed genes in prepubertal and postpubertal theca/stromal cells.
Abbreviations: Avg_log2FC, average log2fold change; Pct.1, percentage of cells where the gene is detected in the identified group; Pct. 2, percentage of cells where the genes is dectected on average in other group; p_val_adj, p-value adjusted for multiple comparisons; Pre, prepubertal; Post, postpubertal.
gene	p_val	avg_log2FC	pct.1	pct.2	p_val_adj	group
ACTA2	0	1.30636	0.632	0.4	0	Pre
C3	0	1.26031	0.362	0.107	0	Pre
MYLK	0	1.2521	0.543	0.369	0	Pre
TAGLN	0	1.23119	0.701	0.504	0	Pre
MEG3	0	1.2157	0.634	0.444	0	Pre
NEAT1	0	1.18605	0.745	0.614	0	Pre
FOSB	0	1.13484	0.792	0.653	0	Pre
CCNL1	0	1.0934	0.6	0.415	0	Pre
C1R	0	1.00418	0.728	0.606	0	Pre
PCSK7	0	0.976739	0.311	0.145	0	Pre
SOCS3	0	0.920035	0.382	0.212	0	Pre
COL3A1	0	0.902907	0.607	0.425	0	Pre
PIM1	0	0.870626	0.299	0.138	0	Pre
QSOX1	0	0.869874	0.441	0.253	0	Pre
C7	0	0.847158	0.742	0.537	0	Pre
FLNA	0	0.846826	0.576	0.391	0	Pre
C1S	0	0.835738	0.717	0.604	0	Pre
MCL1	0	0.833294	0.495	0.327	0	Pre
MT-ND3	0	0.830048	0.998	0.961	0	Pre
MT-CO3	0	0.82076	0.996	0.954	0	Pre
MT-ND1	0	0.816987	0.977	0.903	0	Pre
MT-ND5	0	0.789972	0.934	0.819	0	Pre
MT-ATP6	0	0.786755	0.997	0.959	0	Pre
MT-CYB	0	0.768467	0.994	0.953	0	Pre
IGFBP4	0	0.745983	0.7	0.603	0	Pre
KLF10	0	0.737707	0.322	0.169	0	Pre
TNXB	0	0.729434	0.498	0.324	0	Pre
MTRNR2L12	0	0.719822	0.87	0.726	0	Pre
MT-CO2	0	0.708731	0.994	0.944	0	Pre
MT-ND4	0	0.700564	0.994	0.956	0	Pre
EMILIN1	0	0.689894	0.493	0.321	0	Pre
COL1A2	0	0.687071	0.805	0.684	0	Pre
COL6A2	0	0.682805	0.748	0.618	0	Pre
MT-CO1	0	0.670636	0.994	0.958	0	Pre
EGR1	0	0.666076	0.831	0.81	0	Pre
ACTN1	0	0.664329	0.334	0.188	0	Pre
COL1A1	0	0.654639	0.743	0.635	0	Pre
RBP1	0	0.639848	0.76	0.701	0	Pre
AEBP1	0	0.634574	0.621	0.49	0	Pre
COL6A1	0	0.624441	0.795	0.687	0	Pre
SPARC	0	0.60811	0.685	0.563	0	Pre
COL6A3	0	0.604958	0.655	0.538	0	Pre
ACTB	0	0.571478	0.925	0.901	0	Pre
MT-ND2	0	0.569517	0.978	0.923	0	Pre
JUN	0	0.43166	0.889	0.868	0	Pre
MT-ND4L	0	0.416615	0.878	0.765	0	Pre
RPL13	0	-0.295719	0.986	0.982	0	Pre
RPS8	0	-0.326095	0.982	0.976	0	Pre
RPS4X	0	-0.341503	0.949	0.949	0	Pre
RPL5	0	-0.364174	0.917	0.936	0	Pre
RPL7A	0	-0.379399	0.926	0.934	0	Pre
RPL22	0	-0.38886	0.861	0.91	0	Pre
RPL36	0	-0.391617	0.955	0.963	0	Pre
RPL34	0	-0.399095	0.96	0.964	0	Pre
RPS3A	0	-0.403586	0.939	0.945	0	Pre
RPS7	0	-0.404618	0.884	0.917	0	Pre
RPS15	0	-0.408153	0.927	0.951	0	Pre
ITM2B	0	-0.413709	0.773	0.873	0	Pre
RPS3	0	-0.429027	0.92	0.937	0	Pre
RPL32	0	-0.437341	0.964	0.972	0	Pre
RPL41	0	-0.441247	0.977	0.976	0	Pre
RPL29	0	-0.442641	0.906	0.924	0	Pre
RPL11	0	-0.446457	0.956	0.966	0	Pre
RPL12	0	-0.446915	0.904	0.927	0	Pre
RPL9	0	-0.450175	0.923	0.936	0	Pre
RPL18	0	-0.464839	0.926	0.943	0	Pre
RPL26	0	-0.467942	0.933	0.951	0	Pre
RPS25	0	-0.476647	0.884	0.933	0	Pre
RPL35A	0	-0.481574	0.901	0.932	0	Pre
BTF3	0	-0.482474	0.628	0.755	0	Pre
SNHG6	0	-0.487482	0.509	0.672	0	Pre
RSL24D1	0	-0.488874	0.335	0.505	0	Pre
RPLP1	0	-0.49187	0.965	0.965	0	Pre
RPL23A	0	-0.49851	0.849	0.904	0	Pre
NACA	0	-0.503844	0.855	0.906	0	Pre
S100A6	0	-0.508649	0.586	0.737	0	Pre
NPM1	0	-0.510863	0.716	0.822	0	Pre
RPL19	0	-0.514572	0.902	0.94	0	Pre
PFDN5	0	-0.515655	0.651	0.787	0	Pre
RPS12	0	-0.521321	0.951	0.957	0	Pre
RPS15A	0	-0.527763	0.907	0.936	0	Pre
FTH1	0	-0.533387	0.843	0.901	0	Pre
RPS24	0	-0.53937	0.959	0.971	0	Pre
SNHG29	0	-0.547504	0.633	0.769	0	Pre
EPB41L4A-AS1	0	-0.550317	0.304	0.474	0	Pre
RPL10	0	-0.554713	0.971	0.972	0	Pre
RPL39	0	-0.567591	0.917	0.943	0	Pre
RPS13	0	-0.571483	0.857	0.903	0	Pre
DCN	0	-0.580269	0.91	0.955	0	Pre
ZFAS1	0	-0.60082	0.519	0.683	0	Pre
CYB5A	0	-0.602575	0.304	0.475	0	Pre
FTL	0	-0.619192	0.802	0.881	0	Pre
RPS27A	0	-0.623685	0.939	0.958	0	Pre
RPL14	0	-0.623769	0.863	0.916	0	Pre
RPS23	0	-0.645532	0.938	0.952	0	Pre
SNHG7	0	-0.649388	0.315	0.502	0	Pre
FAU	0	-0.671141	0.806	0.892	0	Pre
RPL24	0	-0.681287	0.864	0.928	0	Pre
SMDT1	0	-0.73238	0.245	0.44	0	Pre
RPL36AL	0	-0.777639	0.589	0.771	0	Pre
RPL30	0	-0.847014	0.902	0.943	0	Pre
RPS10	0	-1.08296	0.455	0.661	0	Pre
IMMP2L	0	-1.1224	0.111	0.254	0	Pre
ADIRF	0	-1.12878	0.303	0.559	0	Pre
ZFPM2	0	-1.18033	0.233	0.38	0	Pre
SOX5	0	-1.21768	0.099	0.268	0	Pre
RORA	0	-1.24235	0.133	0.286	0	Pre
ADAMTS9-AS2	0	-1.26846	0.179	0.373	0	Pre
NAV3	0	-1.4987	0.187	0.379	0	Pre
RAD51B	0	-1.56581	0.13	0.312	0	Pre
RPL13A	5.51488e-306	0.30591	0.962	0.951	2.0185e-301	Pre
VLDLR-AS1	1.61313e-300	-0.884039	0.115	0.254	5.90423e-296	Pre
ATP5MC2	8.13392e-300	-0.415832	0.456	0.62	2.97709e-295	Pre
NSA2	6.56169e-299	-0.498015	0.46	0.624	2.40165e-294	Pre
KLF6	4.86618e-295	0.796739	0.437	0.301	1.78107e-290	Pre
TSC22D1	8.51932e-294	-0.491644	0.36	0.523	3.11816e-289	Pre
DDX5	1.57036e-290	0.563533	0.72	0.661	5.74768e-286	Pre
COMMD6	1.09188e-287	-0.436356	0.531	0.673	3.99638e-283	Pre
COX7C	1.22079e-286	-0.409963	0.633	0.766	4.46823e-282	Pre
MYH11	1.25704e-286	0.79804	0.364	0.222	4.6009e-282	Pre
RPS19	9.00122e-286	-0.337659	0.921	0.931	3.29454e-281	Pre
RPL18A	1.48094e-284	-0.321925	0.916	0.936	5.4204e-280	Pre
TMA7	2.5897e-281	-0.431704	0.502	0.669	9.47855e-277	Pre
RPS21	8.43746e-281	-0.36492	0.892	0.927	3.0882e-276	Pre
SPARCL1	3.30217e-278	0.735075	0.609	0.513	1.20863e-273	Pre
RPS27L	5.78771e-277	-0.459822	0.322	0.474	2.11836e-272	Pre
TBCA	3.60117e-274	-0.428324	0.413	0.573	1.31806e-269	Pre
FOS	1.70689e-271	0.445018	0.896	0.885	6.2474e-267	Pre
RPS18	8.08542e-271	-0.287259	0.971	0.968	2.95934e-266	Pre
MZT2B	1.34791e-270	-0.383557	0.441	0.593	4.93349e-266	Pre
MYL6	5.3072e-263	0.543232	0.715	0.667	1.94249e-258	Pre
YBX3	6.41685e-262	0.794921	0.555	0.452	2.34863e-257	Pre
GREB1	2.02812e-261	0.690064	0.588	0.465	7.42313e-257	Pre
GABARAP	7.83559e-259	-0.368852	0.473	0.621	2.86791e-254	Pre
SELENOM	7.82991e-257	-0.417339	0.363	0.521	2.86583e-252	Pre
CIRBP	5.44889e-252	-0.325338	0.659	0.781	1.99435e-247	Pre
EEF2	2.53575e-249	0.440185	0.818	0.792	9.28109e-245	Pre
RPS14	6.71418e-247	-0.317974	0.909	0.926	2.45746e-242	Pre
SERF2	1.40469e-246	-0.373165	0.582	0.725	5.14131e-242	Pre
KLF9	5.58046e-245	0.634686	0.38	0.251	2.0425e-240	Pre
OST4	1.04487e-243	-0.388578	0.428	0.588	3.82431e-239	Pre
ZFP36L2	1.31096e-242	0.580692	0.664	0.578	4.79826e-238	Pre
H2AFZ	1.46688e-241	-0.445866	0.314	0.458	5.36891e-237	Pre
H3F3B	4.80834e-237	-0.289888	0.855	0.916	1.7599e-232	Pre
PARD3	2.78211e-236	-0.782244	0.168	0.294	1.01828e-231	Pre
SEM1	3.87895e-236	-0.371103	0.391	0.541	1.41974e-231	Pre
SYF2	4.69819e-235	-0.414129	0.34	0.481	1.71959e-230	Pre
ZFP36	9.30242e-235	0.508516	0.622	0.532	3.40478e-230	Pre
NR4A1	1.43362e-234	0.600367	0.64	0.528	5.24719e-230	Pre
KCNQ1OT1	2.01136e-232	0.668121	0.403	0.271	7.36179e-228	Pre
TOMM7	2.17457e-228	-0.342733	0.637	0.756	7.95914e-224	Pre
COX6C	6.21766e-228	-0.380245	0.524	0.67	2.27573e-223	Pre
XIST	1.22349e-227	0.548119	0.719	0.626	4.47811e-223	Pre
IFITM3	3.48243e-222	0.49243	0.707	0.669	1.2746e-217	Pre
MYL9	1.58154e-221	0.603896	0.625	0.559	5.78859e-217	Pre
CELF2	1.14132e-220	-0.555392	0.32	0.46	4.17735e-216	Pre
CARMN	8.53804e-220	0.712915	0.335	0.215	3.12501e-215	Pre
CCN1	8.09368e-216	0.556984	0.491	0.366	2.96237e-211	Pre
FHL2	3.22429e-215	-0.435108	0.54	0.662	1.18012e-210	Pre
TMEM14B	3.41877e-214	-0.428724	0.22	0.348	1.25131e-209	Pre
SOD1	8.22889e-214	-0.318663	0.483	0.615	3.01185e-209	Pre
PPDPF	9.05857e-212	-0.344316	0.432	0.573	3.31553e-207	Pre
TRMT112	7.39472e-210	-0.317482	0.356	0.494	2.70654e-205	Pre
B2M	1.05061e-208	-0.316539	0.748	0.837	3.84532e-204	Pre
NR2F2-AS1	5.34174e-204	-0.685497	0.236	0.364	1.95513e-199	Pre
SSBP2	3.12575e-202	-0.642082	0.228	0.349	1.14405e-197	Pre
FSTL1	4.05702e-201	0.581115	0.407	0.286	1.48491e-196	Pre
PTGES3	1.60145e-200	-0.294258	0.448	0.58	5.86148e-196	Pre
GPX4	3.6103e-198	-0.354488	0.348	0.482	1.32141e-193	Pre
APOE	3.47953e-197	0.584914	0.656	0.604	1.27354e-192	Pre
ABCA10	5.81403e-197	-0.812581	0.188	0.308	2.12799e-192	Pre
UQCRH	3.04788e-194	-0.338536	0.381	0.52	1.11555e-189	Pre
FXYD1	3.59221e-194	-0.367439	0.323	0.457	1.31478e-189	Pre
MEG8	5.17699e-193	0.741156	0.272	0.165	1.89483e-188	Pre
IGFBP7	5.575e-190	0.649633	0.72	0.695	2.04051e-185	Pre
RPS28	3.05098e-189	-0.256547	0.937	0.95	1.11669e-184	Pre
RBIS	2.53077e-185	-0.354288	0.314	0.439	9.26287e-181	Pre
ANXA1	6.94569e-185	-0.401922	0.232	0.358	2.54219e-180	Pre
LGALS3	4.81881e-183	-0.352879	0.494	0.636	1.76373e-178	Pre
MIDN	4.82074e-182	0.57701	0.259	0.158	1.76444e-177	Pre
TSTD1	7.20458e-180	-0.405028	0.16	0.267	2.63695e-175	Pre
PBX3	1.60045e-179	-0.609959	0.22	0.335	5.85781e-175	Pre
NDUFB4	1.63704e-179	-0.317453	0.344	0.475	5.99172e-175	Pre
IRF2BPL	2.05509e-178	0.536334	0.349	0.239	7.52183e-174	Pre
ATP6V1G1	4.60045e-176	-0.31108	0.36	0.484	1.68381e-171	Pre
MGST3	8.90082e-176	-0.321593	0.41	0.536	3.25779e-171	Pre
SRP14	1.30708e-174	-0.283341	0.661	0.776	4.78405e-170	Pre
ABI3BP	5.58245e-174	-0.588407	0.224	0.341	2.04323e-169	Pre
TPM1	7.59477e-174	0.611458	0.563	0.495	2.77976e-169	Pre
IFITM2	2.28933e-169	0.563578	0.51	0.429	8.37917e-165	Pre
NCAM1	6.48256e-168	0.408778	0.291	0.185	2.37268e-163	Pre
S100A10	2.65178e-166	-0.358585	0.524	0.649	9.70578e-162	Pre
C12orf57	5.92489e-166	-0.282687	0.497	0.615	2.16857e-161	Pre
COX7A2L	9.59434e-165	-0.277802	0.31	0.431	3.51163e-160	Pre
RBMS3	4.0616e-164	-0.596894	0.317	0.432	1.48659e-159	Pre
ATP5MG	5.45013e-164	-0.274522	0.475	0.61	1.9948e-159	Pre
NDUFS5	2.6236e-163	-0.278424	0.4	0.527	9.60264e-159	Pre
RPS17	7.15777e-163	0.368596	0.81	0.778	2.61982e-158	Pre
PDLIM7	9.21795e-163	0.460451	0.256	0.16	3.37386e-158	Pre
VCL	1.07859e-162	0.500838	0.318	0.215	3.94774e-158	Pre
PDZRN3	3.45046e-161	-0.665436	0.162	0.264	1.2629e-156	Pre
FAM162A	2.89187e-160	-0.318789	0.251	0.362	1.05845e-155	Pre
C19orf53	3.38112e-160	-0.301328	0.305	0.424	1.23752e-155	Pre
TPM4	1.43876e-159	0.52427	0.568	0.498	5.26601e-155	Pre
ERH	7.23891e-157	-0.261076	0.302	0.425	2.64951e-152	Pre
PALLD	7.97863e-157	0.566089	0.487	0.395	2.92026e-152	Pre
BRI3	1.83523e-155	-0.259486	0.323	0.437	6.71714e-151	Pre
CDKN1A	3.38724e-154	0.478806	0.255	0.163	1.23976e-149	Pre
PDGFRA	1.16979e-153	0.512537	0.647	0.58	4.28156e-149	Pre
CLEC2B	9.23709e-153	-0.338482	0.202	0.307	3.38087e-148	Pre
EIF4A1	1.33285e-152	0.473582	0.628	0.572	4.87836e-148	Pre
EBF1	6.1511e-151	-0.602147	0.172	0.272	2.25136e-146	Pre
GNG11	1.58927e-150	-0.284466	0.39	0.509	5.81688e-146	Pre
SERPINF1	3.18566e-149	0.66159	0.475	0.406	1.16598e-144	Pre
HSP90AB1	3.72745e-149	-0.257356	0.755	0.824	1.36428e-144	Pre
RPS5	5.00678e-148	-0.268359	0.859	0.883	1.83253e-143	Pre
SEC11A	1.01705e-146	-0.274704	0.338	0.454	3.72252e-142	Pre
SEC61B	1.14639e-146	-0.285524	0.336	0.454	4.19588e-142	Pre
ZBTB20	1.91608e-146	-0.555501	0.497	0.6	7.01303e-142	Pre
LGALS1	1.63782e-144	-0.273779	0.723	0.798	5.99458e-140	Pre
NDUFC1	4.38415e-144	-0.296459	0.347	0.465	1.60464e-139	Pre
COX8A	2.74333e-143	-0.294847	0.289	0.4	1.00409e-138	Pre
SUPT5H	7.14044e-142	0.521863	0.261	0.169	2.61347e-137	Pre
GAS5	9.65116e-142	-0.270837	0.629	0.725	3.53242e-137	Pre
TPM2	9.84133e-142	0.54095	0.655	0.627	3.60203e-137	Pre
HNRNPU	1.30349e-141	0.558232	0.608	0.534	4.77091e-137	Pre
SLC40A1	4.80578e-141	-0.277452	0.392	0.519	1.75896e-136	Pre
EEF1B2	1.18556e-140	-0.261337	0.67	0.755	4.33926e-136	Pre
JAK1	5.14594e-140	-0.388121	0.338	0.446	1.88347e-135	Pre
MZT2A	1.97982e-139	-0.285995	0.3	0.407	7.24634e-135	Pre
MARCKS	3.71719e-139	-0.255012	0.38	0.497	1.36053e-134	Pre
SSBP1	1.74368e-138	-0.263175	0.289	0.398	6.38205e-134	Pre
AKT3	5.77246e-138	-0.482912	0.223	0.322	2.11278e-133	Pre
COL5A1	1.32272e-137	0.352756	0.287	0.19	4.8413e-133	Pre
CSTB	1.0646e-134	-0.275047	0.301	0.405	3.89655e-130	Pre
MAPK10	1.12881e-134	-0.559116	0.16	0.252	4.13158e-130	Pre
MYC	2.5506e-134	0.511486	0.3	0.21	9.33546e-130	Pre
TUSC3	4.36462e-134	-0.335563	0.168	0.261	1.59749e-129	Pre
CHL1	5.68665e-133	0.452916	0.271	0.183	2.08137e-128	Pre
STAG1	9.14661e-133	-0.474087	0.174	0.267	3.34775e-128	Pre
CNN2	9.18428e-132	0.453693	0.317	0.226	3.36154e-127	Pre
SMIM26	5.30693e-131	-0.264939	0.299	0.403	1.94239e-126	Pre
MMP2	1.06162e-130	0.409918	0.422	0.322	3.88564e-126	Pre
SERPINH1	1.32382e-130	0.423237	0.38	0.282	4.84533e-126	Pre
ID4	1.88915e-129	-0.278165	0.243	0.353	6.91446e-125	Pre
CCN5	1.95759e-128	-0.277419	0.306	0.419	7.16497e-124	Pre
MT-ND6	5.46158e-125	0.380886	0.293	0.203	1.99899e-120	Pre
SDHD	8.10318e-125	-0.254472	0.168	0.259	2.96585e-120	Pre
H1FX	2.74127e-123	-0.301021	0.365	0.473	1.00333e-118	Pre
POLR1D	1.45196e-121	-0.251049	0.275	0.374	5.31433e-117	Pre
DDT	2.60839e-120	-0.278356	0.24	0.336	9.54697e-116	Pre
TRA2B	8.64041e-119	0.432448	0.475	0.388	3.16248e-114	Pre
BICC1	5.84091e-118	-0.56614	0.217	0.307	2.13783e-113	Pre
TGFB1I1	3.18795e-117	0.473586	0.316	0.235	1.16682e-112	Pre
ITGB1	1.06858e-116	0.375103	0.627	0.587	3.9111e-112	Pre
ITPR1	4.15627e-116	0.461558	0.392	0.3	1.52124e-111	Pre
NFKBIZ	1.72685e-114	0.502194	0.285	0.202	6.32044e-110	Pre
PLEKHA5	6.19664e-112	-0.359262	0.252	0.347	2.26803e-107	Pre
AUTS2	8.14467e-112	-0.638516	0.237	0.32	2.98103e-107	Pre
CLSTN2	1.64157e-111	0.436183	0.316	0.228	6.00833e-107	Pre
ZFP36L1	5.18629e-111	0.383881	0.791	0.791	1.89823e-106	Pre
MIR99AHG	5.34426e-111	-0.585397	0.592	0.678	1.95605e-106	Pre
COL4A2	3.94335e-108	0.370978	0.377	0.29	1.44331e-103	Pre
MAP3K5	2.99338e-107	-0.52535	0.236	0.32	1.09561e-102	Pre
APP	9.47257e-106	-0.267563	0.471	0.569	3.46705e-101	Pre
CPQ	2.60428e-105	-0.335879	0.346	0.437	9.53193e-101	Pre
LUM	4.32994e-103	-0.408241	0.334	0.426	1.5848e-98	Pre
PLCG2	6.58682e-103	0.530144	0.503	0.423	2.41084e-98	Pre
EHBP1	8.34693e-102	-0.518308	0.274	0.357	3.05506e-97	Pre
NLGN4X	1.92178e-101	0.382751	0.253	0.175	7.03392e-97	Pre
STAT3	7.47488e-101	0.378927	0.377	0.295	2.73588e-96	Pre
MALAT1	1.80437e-98	0.285222	0.99	0.979	6.60416e-94	Pre
FUS	2.30313e-96	0.389416	0.58	0.519	8.42969e-92	Pre
BTG2	1.80983e-94	0.417601	0.49	0.415	6.62414e-90	Pre
KANK2	3.12768e-94	0.421364	0.453	0.383	1.14476e-89	Pre
FLRT2	3.01304e-93	-0.472926	0.282	0.367	1.1028e-88	Pre
PPP1R12B	4.02006e-93	0.393712	0.405	0.324	1.47138e-88	Pre
SERPING1	1.0497e-92	0.43014	0.601	0.586	3.84201e-88	Pre
ANXA6	1.16496e-92	0.401459	0.318	0.242	4.26386e-88	Pre
PTGIS	1.93339e-91	0.384082	0.265	0.191	7.07639e-87	Pre
CFH	7.51596e-91	0.370725	0.618	0.572	2.75092e-86	Pre
SULF2	1.17485e-89	0.345682	0.346	0.268	4.30008e-85	Pre
DDX3X	7.21652e-89	0.448451	0.514	0.447	2.64132e-84	Pre
COL4A1	1.32271e-88	0.325699	0.264	0.189	4.84125e-84	Pre
C11orf96	3.32798e-88	0.34017	0.531	0.461	1.21807e-83	Pre
GADD45B	2.14269e-87	0.530132	0.509	0.46	7.84248e-83	Pre
ANGPTL1	5.86666e-87	0.418537	0.259	0.188	2.14726e-82	Pre
PEG3	1.52295e-85	0.332135	0.739	0.712	5.57416e-81	Pre
TTC28	1.47888e-84	-0.490674	0.223	0.296	5.41286e-80	Pre
SVIL	8.54387e-82	-0.295754	0.426	0.512	3.12714e-77	Pre
SBF2	4.2165e-81	-0.397239	0.196	0.268	1.54328e-76	Pre
RTN4	4.96805e-81	0.407764	0.521	0.467	1.81836e-76	Pre
COL18A1	2.48424e-79	0.333479	0.4	0.322	9.09257e-75	Pre
MARCKSL1	4.28279e-79	0.370425	0.506	0.45	1.56755e-74	Pre
PSD3	5.03975e-77	-0.319783	0.249	0.327	1.8446e-72	Pre
SLC38A2	9.65734e-76	0.35623	0.647	0.606	3.53468e-71	Pre
UBC	8.12497e-75	0.272748	0.744	0.74	2.97382e-70	Pre
VMP1	2.03968e-73	0.398526	0.288	0.22	7.46543e-69	Pre
NID1	1.19297e-71	0.310156	0.28	0.211	4.36638e-67	Pre
HSPA1A	2.14597e-70	-0.392043	0.282	0.353	7.85446e-66	Pre
ZFAND5	5.52344e-68	0.430396	0.456	0.395	2.02163e-63	Pre
STK3	5.30571e-67	-0.376848	0.206	0.269	1.94194e-62	Pre
LIMA1	6.30393e-67	0.327907	0.29	0.224	2.3073e-62	Pre
ZNF704	3.56567e-65	-0.267353	0.248	0.32	1.30507e-60	Pre
IGF1R	4.88835e-65	-0.321991	0.234	0.303	1.78919e-60	Pre
MIR100HG	5.73515e-65	-0.279404	0.248	0.316	2.09912e-60	Pre
JMJD1C	6.70226e-65	-0.271646	0.359	0.435	2.45309e-60	Pre
CCN2	8.42078e-65	0.367714	0.277	0.214	3.08209e-60	Pre
CFL1	5.26979e-64	0.387337	0.479	0.443	1.9288e-59	Pre
RBPMS	2.15176e-62	-0.267934	0.354	0.429	7.87565e-58	Pre
SPECC1	1.13853e-61	0.304443	0.27	0.208	4.16712e-57	Pre
TCEAL4	2.25217e-61	0.322661	0.756	0.775	8.24316e-57	Pre
THBS1	2.24845e-59	0.377648	0.304	0.241	8.22956e-55	Pre
ID3	6.97633e-59	-0.416207	0.313	0.381	2.5534e-54	Pre
DAAM1	7.57621e-59	0.299164	0.268	0.207	2.77297e-54	Pre
UBXN8	1.97435e-57	0.293287	0.278	0.216	7.22631e-53	Pre
KANSL1	3.07542e-57	-0.268408	0.272	0.337	1.12563e-52	Pre
BCLAF1	4.22151e-57	0.34523	0.425	0.364	1.54512e-52	Pre
DDIT4	8.48996e-56	-0.27846	0.19	0.25	3.10741e-51	Pre
ATP1A1	3.62809e-55	0.319559	0.336	0.275	1.32792e-50	Pre
MAML2	2.0841e-54	-0.385292	0.2	0.256	7.62803e-50	Pre
GATA6	2.29059e-54	0.253787	0.29	0.229	8.38379e-50	Pre
FTX	2.33161e-52	-0.349281	0.377	0.439	8.53393e-48	Pre
HSPA8	3.67663e-52	0.311012	0.464	0.415	1.34568e-47	Pre
ACTR3	5.34812e-50	0.279831	0.258	0.202	1.95747e-45	Pre
PSAP	9.10907e-49	0.268506	0.658	0.645	3.33401e-44	Pre
RPN2	1.84818e-48	0.304889	0.304	0.246	6.76453e-44	Pre
DPYSL3	5.4639e-48	0.320578	0.423	0.368	1.99984e-43	Pre
MAOB	1.53486e-46	0.330759	0.322	0.271	5.61775e-42	Pre
GTF2I	3.18465e-46	0.313526	0.505	0.462	1.16561e-41	Pre
MACF1	5.22174e-46	0.296966	0.533	0.49	1.91121e-41	Pre
EIF4G2	6.86232e-46	0.329905	0.47	0.423	2.51168e-41	Pre
IGFBP2	2.44663e-45	0.300791	0.415	0.365	8.9549e-41	Pre
LDHA	2.78445e-45	0.321398	0.301	0.253	1.01914e-40	Pre
SOD2	1.77546e-44	0.382302	0.327	0.277	6.49836e-40	Pre
MORF4L2	1.79355e-44	0.334807	0.575	0.567	6.56459e-40	Pre
KPNB1	6.16121e-44	0.333293	0.326	0.273	2.25507e-39	Pre
PPP1R14A	2.00457e-43	0.320966	0.407	0.366	7.33692e-39	Pre
SMG1	1.26585e-42	0.272847	0.264	0.214	4.63312e-38	Pre
SFRP4	1.62732e-42	0.324465	0.277	0.227	5.95615e-38	Pre
EFEMP2	4.86872e-42	0.270241	0.28	0.229	1.782e-37	Pre
SYNE2	1.21649e-41	0.381141	0.473	0.435	4.45247e-37	Pre
NUFIP2	3.27825e-41	0.271007	0.27	0.218	1.19987e-36	Pre
MYADM	1.06021e-40	0.30166	0.332	0.283	3.88047e-36	Pre
SFPQ	1.30047e-40	0.29662	0.439	0.394	4.75984e-36	Pre
NPEPPS	1.7798e-40	0.274934	0.282	0.231	6.51425e-36	Pre
PPP1R15A	2.58299e-40	0.320567	0.363	0.32	9.454e-36	Pre
MLXIP	3.15851e-40	0.257952	0.273	0.222	1.15605e-35	Pre
HTRA1	1.20496e-39	0.291848	0.516	0.481	4.41028e-35	Pre
SREK1	2.16513e-37	0.260047	0.272	0.223	7.92461e-33	Pre
MYH9	2.31635e-37	0.252937	0.277	0.227	8.47806e-33	Pre
ACTN4	5.30159e-37	0.254839	0.334	0.282	1.94043e-32	Pre
HLA-E	5.48102e-37	0.319623	0.388	0.345	2.00611e-32	Pre
RCN1	1.63671e-36	0.263215	0.312	0.264	5.99053e-32	Pre
SF1	2.50568e-36	0.254278	0.442	0.397	9.17106e-32	Pre
CSRP1	3.07273e-36	0.268044	0.346	0.301	1.12465e-31	Pre
PARVA	5.30324e-36	0.261923	0.292	0.242	1.94104e-31	Pre
FBLN1	5.29533e-35	-0.346983	0.22	0.269	1.93814e-30	Pre
BNC2	5.64439e-35	-0.449952	0.504	0.545	2.0659e-30	Pre
FOXL2	3.61217e-34	0.25773	0.312	0.264	1.32209e-29	Pre
AASS	6.14035e-34	0.265624	0.322	0.274	2.24743e-29	Pre
FGFR1	5.37231e-33	0.28533	0.338	0.294	1.96632e-28	Pre
P4HB	7.34372e-32	0.254929	0.304	0.261	2.68788e-27	Pre
GLUL	7.59184e-32	0.336586	0.464	0.433	2.77869e-27	Pre
WFS1	2.10214e-31	0.250289	0.268	0.224	7.69405e-27	Pre
BSG	2.75292e-31	0.291465	0.411	0.373	1.0076e-26	Pre
GASK1B	1.20926e-29	0.25174	0.35	0.305	4.42602e-25	Pre
ITM2A	9.88337e-29	0.255817	0.405	0.372	3.61741e-24	Pre
GAPDH	1.16432e-28	0.277884	0.619	0.64	4.26152e-24	Pre
LMNA	1.41763e-27	0.325799	0.452	0.425	5.18865e-23	Pre
PLPP3	1.43732e-27	0.328821	0.387	0.354	5.26074e-23	Pre
SCARB2	3.03631e-27	0.25534	0.331	0.29	1.11132e-22	Pre
NBL1	2.30914e-26	0.314209	0.511	0.499	8.45167e-22	Pre
ZBTB16	5.52118e-25	-0.388335	0.249	0.283	2.02081e-20	Pre
MT2A	3.9395e-19	0.429358	0.271	0.241	1.4419e-14	Pre
ENO1	8.22544e-19	0.274905	0.308	0.281	3.01059e-14	Pre
MIF	1.41124e-18	0.263142	0.557	0.572	5.16529e-14	Pre
HSPB1	1.24309e-16	0.289249	0.547	0.538	4.54985e-12	Pre
CAV1	4.81342e-16	0.295152	0.445	0.441	1.76176e-11	Pre
SAT1	4.95584e-14	0.260578	0.368	0.346	1.81389e-09	Pre
TPI1	1.22692e-12	0.294331	0.345	0.332	4.49067e-08	Pre
MGP	1.51019e-11	0.317509	0.445	0.443	5.52743e-07	Pre
RAD51B	0	1.56581	0.312	0.13	0	Post
NAV3	0	1.4987	0.379	0.187	0	Post
ADAMTS9-AS2	0	1.26846	0.373	0.179	0	Post
RORA	0	1.24235	0.286	0.133	0	Post
SOX5	0	1.21768	0.268	0.099	0	Post
ZFPM2	0	1.18033	0.38	0.233	0	Post
ADIRF	0	1.12878	0.559	0.303	0	Post
IMMP2L	0	1.1224	0.254	0.111	0	Post
RPS10	0	1.08296	0.661	0.455	0	Post
RPL30	0	0.847014	0.943	0.902	0	Post
RPL36AL	0	0.777639	0.771	0.589	0	Post
SMDT1	0	0.73238	0.44	0.245	0	Post
RPL24	0	0.681287	0.928	0.864	0	Post
FAU	0	0.671141	0.892	0.806	0	Post
SNHG7	0	0.649388	0.502	0.315	0	Post
RPS23	0	0.645532	0.952	0.938	0	Post
RPL14	0	0.623769	0.916	0.863	0	Post
RPS27A	0	0.623685	0.958	0.939	0	Post
FTL	0	0.619192	0.881	0.802	0	Post
CYB5A	0	0.602575	0.475	0.304	0	Post
ZFAS1	0	0.60082	0.683	0.519	0	Post
DCN	0	0.580269	0.955	0.91	0	Post
RPS13	0	0.571483	0.903	0.857	0	Post
RPL39	0	0.567591	0.943	0.917	0	Post
RPL10	0	0.554713	0.972	0.971	0	Post
EPB41L4A-AS1	0	0.550317	0.474	0.304	0	Post
SNHG29	0	0.547504	0.769	0.633	0	Post
RPS24	0	0.53937	0.971	0.959	0	Post
FTH1	0	0.533387	0.901	0.843	0	Post
RPS15A	0	0.527763	0.936	0.907	0	Post
RPS12	0	0.521321	0.957	0.951	0	Post
PFDN5	0	0.515655	0.787	0.651	0	Post
RPL19	0	0.514572	0.94	0.902	0	Post
NPM1	0	0.510863	0.822	0.716	0	Post
S100A6	0	0.508649	0.737	0.586	0	Post
NACA	0	0.503844	0.906	0.855	0	Post
RPL23A	0	0.49851	0.904	0.849	0	Post
RPLP1	0	0.49187	0.965	0.965	0	Post
RSL24D1	0	0.488874	0.505	0.335	0	Post
SNHG6	0	0.487482	0.672	0.509	0	Post
BTF3	0	0.482474	0.755	0.628	0	Post
RPL35A	0	0.481574	0.932	0.901	0	Post
RPS25	0	0.476647	0.933	0.884	0	Post
RPL26	0	0.467942	0.951	0.933	0	Post
RPL18	0	0.464839	0.943	0.926	0	Post
RPL9	0	0.450175	0.936	0.923	0	Post
RPL12	0	0.446915	0.927	0.904	0	Post
RPL11	0	0.446457	0.966	0.956	0	Post
RPL29	0	0.442641	0.924	0.906	0	Post
RPL41	0	0.441247	0.976	0.977	0	Post
RPL32	0	0.437341	0.972	0.964	0	Post
RPS3	0	0.429027	0.937	0.92	0	Post
ITM2B	0	0.413709	0.873	0.773	0	Post
RPS15	0	0.408153	0.951	0.927	0	Post
RPS7	0	0.404618	0.917	0.884	0	Post
RPS3A	0	0.403586	0.945	0.939	0	Post
RPL34	0	0.399095	0.964	0.96	0	Post
RPL36	0	0.391617	0.963	0.955	0	Post
RPL22	0	0.38886	0.91	0.861	0	Post
RPL7A	0	0.379399	0.934	0.926	0	Post
RPL5	0	0.364174	0.936	0.917	0	Post
RPS4X	0	0.341503	0.949	0.949	0	Post
RPS8	0	0.326095	0.976	0.982	0	Post
RPL13	0	0.295719	0.982	0.986	0	Post
MT-ND4L	0	-0.416615	0.765	0.878	0	Post
JUN	0	-0.43166	0.868	0.889	0	Post
MT-ND2	0	-0.569517	0.923	0.978	0	Post
ACTB	0	-0.571478	0.901	0.925	0	Post
COL6A3	0	-0.604958	0.538	0.655	0	Post
SPARC	0	-0.60811	0.563	0.685	0	Post
COL6A1	0	-0.624441	0.687	0.795	0	Post
AEBP1	0	-0.634574	0.49	0.621	0	Post
RBP1	0	-0.639848	0.701	0.76	0	Post
COL1A1	0	-0.654639	0.635	0.743	0	Post
ACTN1	0	-0.664329	0.188	0.334	0	Post
EGR1	0	-0.666076	0.81	0.831	0	Post
MT-CO1	0	-0.670636	0.958	0.994	0	Post
COL6A2	0	-0.682805	0.618	0.748	0	Post
COL1A2	0	-0.687071	0.684	0.805	0	Post
EMILIN1	0	-0.689894	0.321	0.493	0	Post
MT-ND4	0	-0.700564	0.956	0.994	0	Post
MT-CO2	0	-0.708731	0.944	0.994	0	Post
MTRNR2L12	0	-0.719822	0.726	0.87	0	Post
TNXB	0	-0.729434	0.324	0.498	0	Post
KLF10	0	-0.737707	0.169	0.322	0	Post
IGFBP4	0	-0.745983	0.603	0.7	0	Post
MT-CYB	0	-0.768467	0.953	0.994	0	Post
MT-ATP6	0	-0.786755	0.959	0.997	0	Post
MT-ND5	0	-0.789972	0.819	0.934	0	Post
MT-ND1	0	-0.816987	0.903	0.977	0	Post
MT-CO3	0	-0.82076	0.954	0.996	0	Post
MT-ND3	0	-0.830048	0.961	0.998	0	Post
MCL1	0	-0.833294	0.327	0.495	0	Post
C1S	0	-0.835738	0.604	0.717	0	Post
FLNA	0	-0.846826	0.391	0.576	0	Post
C7	0	-0.847158	0.537	0.742	0	Post
QSOX1	0	-0.869874	0.253	0.441	0	Post
PIM1	0	-0.870626	0.138	0.299	0	Post
COL3A1	0	-0.902907	0.425	0.607	0	Post
SOCS3	0	-0.920035	0.212	0.382	0	Post
PCSK7	0	-0.976739	0.145	0.311	0	Post
C1R	0	-1.00418	0.606	0.728	0	Post
CCNL1	0	-1.0934	0.415	0.6	0	Post
FOSB	0	-1.13484	0.653	0.792	0	Post
NEAT1	0	-1.18605	0.614	0.745	0	Post
MEG3	0	-1.2157	0.444	0.634	0	Post
TAGLN	0	-1.23119	0.504	0.701	0	Post
MYLK	0	-1.2521	0.369	0.543	0	Post
C3	0	-1.26031	0.107	0.362	0	Post
ACTA2	0	-1.30636	0.4	0.632	0	Post
RPL13A	5.51488e-306	-0.30591	0.951	0.962	2.0185e-301	Post
VLDLR-AS1	1.61313e-300	0.884039	0.254	0.115	5.90423e-296	Post
ATP5MC2	8.13392e-300	0.415832	0.62	0.456	2.97709e-295	Post
NSA2	6.56169e-299	0.498015	0.624	0.46	2.40165e-294	Post
KLF6	4.86618e-295	-0.796739	0.301	0.437	1.78107e-290	Post
TSC22D1	8.51932e-294	0.491644	0.523	0.36	3.11816e-289	Post
DDX5	1.57036e-290	-0.563533	0.661	0.72	5.74768e-286	Post
COMMD6	1.09188e-287	0.436356	0.673	0.531	3.99638e-283	Post
COX7C	1.22079e-286	0.409963	0.766	0.633	4.46823e-282	Post
MYH11	1.25704e-286	-0.79804	0.222	0.364	4.6009e-282	Post
RPS19	9.00122e-286	0.337659	0.931	0.921	3.29454e-281	Post
RPL18A	1.48094e-284	0.321925	0.936	0.916	5.4204e-280	Post
TMA7	2.5897e-281	0.431704	0.669	0.502	9.47855e-277	Post
RPS21	8.43746e-281	0.36492	0.927	0.892	3.0882e-276	Post
SPARCL1	3.30217e-278	-0.735075	0.513	0.609	1.20863e-273	Post
RPS27L	5.78771e-277	0.459822	0.474	0.322	2.11836e-272	Post
TBCA	3.60117e-274	0.428324	0.573	0.413	1.31806e-269	Post
FOS	1.70689e-271	-0.445018	0.885	0.896	6.2474e-267	Post
RPS18	8.08542e-271	0.287259	0.968	0.971	2.95934e-266	Post
MZT2B	1.34791e-270	0.383557	0.593	0.441	4.93349e-266	Post
MYL6	5.3072e-263	-0.543232	0.667	0.715	1.94249e-258	Post
YBX3	6.41685e-262	-0.794921	0.452	0.555	2.34863e-257	Post
GREB1	2.02812e-261	-0.690064	0.465	0.588	7.42313e-257	Post
GABARAP	7.83559e-259	0.368852	0.621	0.473	2.86791e-254	Post
SELENOM	7.82991e-257	0.417339	0.521	0.363	2.86583e-252	Post
CIRBP	5.44889e-252	0.325338	0.781	0.659	1.99435e-247	Post
EEF2	2.53575e-249	-0.440185	0.792	0.818	9.28109e-245	Post
RPS14	6.71418e-247	0.317974	0.926	0.909	2.45746e-242	Post
SERF2	1.40469e-246	0.373165	0.725	0.582	5.14131e-242	Post
KLF9	5.58046e-245	-0.634686	0.251	0.38	2.0425e-240	Post
OST4	1.04487e-243	0.388578	0.588	0.428	3.82431e-239	Post
ZFP36L2	1.31096e-242	-0.580692	0.578	0.664	4.79826e-238	Post
H2AFZ	1.46688e-241	0.445866	0.458	0.314	5.36891e-237	Post
H3F3B	4.80834e-237	0.289888	0.916	0.855	1.7599e-232	Post
PARD3	2.78211e-236	0.782244	0.294	0.168	1.01828e-231	Post
SEM1	3.87895e-236	0.371103	0.541	0.391	1.41974e-231	Post
SYF2	4.69819e-235	0.414129	0.481	0.34	1.71959e-230	Post
ZFP36	9.30242e-235	-0.508516	0.532	0.622	3.40478e-230	Post
NR4A1	1.43362e-234	-0.600367	0.528	0.64	5.24719e-230	Post
KCNQ1OT1	2.01136e-232	-0.668121	0.271	0.403	7.36179e-228	Post
TOMM7	2.17457e-228	0.342733	0.756	0.637	7.95914e-224	Post
COX6C	6.21766e-228	0.380245	0.67	0.524	2.27573e-223	Post
XIST	1.22349e-227	-0.548119	0.626	0.719	4.47811e-223	Post
IFITM3	3.48243e-222	-0.49243	0.669	0.707	1.2746e-217	Post
MYL9	1.58154e-221	-0.603896	0.559	0.625	5.78859e-217	Post
CELF2	1.14132e-220	0.555392	0.46	0.32	4.17735e-216	Post
CARMN	8.53804e-220	-0.712915	0.215	0.335	3.12501e-215	Post
CCN1	8.09368e-216	-0.556984	0.366	0.491	2.96237e-211	Post
FHL2	3.22429e-215	0.435108	0.662	0.54	1.18012e-210	Post
TMEM14B	3.41877e-214	0.428724	0.348	0.22	1.25131e-209	Post
SOD1	8.22889e-214	0.318663	0.615	0.483	3.01185e-209	Post
PPDPF	9.05857e-212	0.344316	0.573	0.432	3.31553e-207	Post
TRMT112	7.39472e-210	0.317482	0.494	0.356	2.70654e-205	Post
B2M	1.05061e-208	0.316539	0.837	0.748	3.84532e-204	Post
NR2F2-AS1	5.34174e-204	0.685497	0.364	0.236	1.95513e-199	Post
SSBP2	3.12575e-202	0.642082	0.349	0.228	1.14405e-197	Post
FSTL1	4.05702e-201	-0.581115	0.286	0.407	1.48491e-196	Post
PTGES3	1.60145e-200	0.294258	0.58	0.448	5.86148e-196	Post
GPX4	3.6103e-198	0.354488	0.482	0.348	1.32141e-193	Post
APOE	3.47953e-197	-0.584914	0.604	0.656	1.27354e-192	Post
ABCA10	5.81403e-197	0.812581	0.308	0.188	2.12799e-192	Post
UQCRH	3.04788e-194	0.338536	0.52	0.381	1.11555e-189	Post
FXYD1	3.59221e-194	0.367439	0.457	0.323	1.31478e-189	Post
MEG8	5.17699e-193	-0.741156	0.165	0.272	1.89483e-188	Post
IGFBP7	5.575e-190	-0.649633	0.695	0.72	2.04051e-185	Post
RPS28	3.05098e-189	0.256547	0.95	0.937	1.11669e-184	Post
RBIS	2.53077e-185	0.354288	0.439	0.314	9.26287e-181	Post
ANXA1	6.94569e-185	0.401922	0.358	0.232	2.54219e-180	Post
LGALS3	4.81881e-183	0.352879	0.636	0.494	1.76373e-178	Post
MIDN	4.82074e-182	-0.57701	0.158	0.259	1.76444e-177	Post
TSTD1	7.20458e-180	0.405028	0.267	0.16	2.63695e-175	Post
PBX3	1.60045e-179	0.609959	0.335	0.22	5.85781e-175	Post
NDUFB4	1.63704e-179	0.317453	0.475	0.344	5.99172e-175	Post
IRF2BPL	2.05509e-178	-0.536334	0.239	0.349	7.52183e-174	Post
ATP6V1G1	4.60045e-176	0.31108	0.484	0.36	1.68381e-171	Post
MGST3	8.90082e-176	0.321593	0.536	0.41	3.25779e-171	Post
SRP14	1.30708e-174	0.283341	0.776	0.661	4.78405e-170	Post
ABI3BP	5.58245e-174	0.588407	0.341	0.224	2.04323e-169	Post
TPM1	7.59477e-174	-0.611458	0.495	0.563	2.77976e-169	Post
IFITM2	2.28933e-169	-0.563578	0.429	0.51	8.37917e-165	Post
NCAM1	6.48256e-168	-0.408778	0.185	0.291	2.37268e-163	Post
S100A10	2.65178e-166	0.358585	0.649	0.524	9.70578e-162	Post
C12orf57	5.92489e-166	0.282687	0.615	0.497	2.16857e-161	Post
COX7A2L	9.59434e-165	0.277802	0.431	0.31	3.51163e-160	Post
RBMS3	4.0616e-164	0.596894	0.432	0.317	1.48659e-159	Post
ATP5MG	5.45013e-164	0.274522	0.61	0.475	1.9948e-159	Post
NDUFS5	2.6236e-163	0.278424	0.527	0.4	9.60264e-159	Post
RPS17	7.15777e-163	-0.368596	0.778	0.81	2.61982e-158	Post
PDLIM7	9.21795e-163	-0.460451	0.16	0.256	3.37386e-158	Post
VCL	1.07859e-162	-0.500838	0.215	0.318	3.94774e-158	Post
PDZRN3	3.45046e-161	0.665436	0.264	0.162	1.2629e-156	Post
FAM162A	2.89187e-160	0.318789	0.362	0.251	1.05845e-155	Post
C19orf53	3.38112e-160	0.301328	0.424	0.305	1.23752e-155	Post
TPM4	1.43876e-159	-0.52427	0.498	0.568	5.26601e-155	Post
ERH	7.23891e-157	0.261076	0.425	0.302	2.64951e-152	Post
PALLD	7.97863e-157	-0.566089	0.395	0.487	2.92026e-152	Post
BRI3	1.83523e-155	0.259486	0.437	0.323	6.71714e-151	Post
CDKN1A	3.38724e-154	-0.478806	0.163	0.255	1.23976e-149	Post
PDGFRA	1.16979e-153	-0.512537	0.58	0.647	4.28156e-149	Post
CLEC2B	9.23709e-153	0.338482	0.307	0.202	3.38087e-148	Post
EIF4A1	1.33285e-152	-0.473582	0.572	0.628	4.87836e-148	Post
EBF1	6.1511e-151	0.602147	0.272	0.172	2.25136e-146	Post
GNG11	1.58927e-150	0.284466	0.509	0.39	5.81688e-146	Post
SERPINF1	3.18566e-149	-0.66159	0.406	0.475	1.16598e-144	Post
HSP90AB1	3.72745e-149	0.257356	0.824	0.755	1.36428e-144	Post
RPS5	5.00678e-148	0.268359	0.883	0.859	1.83253e-143	Post
SEC11A	1.01705e-146	0.274704	0.454	0.338	3.72252e-142	Post
SEC61B	1.14639e-146	0.285524	0.454	0.336	4.19588e-142	Post
ZBTB20	1.91608e-146	0.555501	0.6	0.497	7.01303e-142	Post
LGALS1	1.63782e-144	0.273779	0.798	0.723	5.99458e-140	Post
NDUFC1	4.38415e-144	0.296459	0.465	0.347	1.60464e-139	Post
COX8A	2.74333e-143	0.294847	0.4	0.289	1.00409e-138	Post
SUPT5H	7.14044e-142	-0.521863	0.169	0.261	2.61347e-137	Post
GAS5	9.65116e-142	0.270837	0.725	0.629	3.53242e-137	Post
TPM2	9.84133e-142	-0.54095	0.627	0.655	3.60203e-137	Post
HNRNPU	1.30349e-141	-0.558232	0.534	0.608	4.77091e-137	Post
SLC40A1	4.80578e-141	0.277452	0.519	0.392	1.75896e-136	Post
EEF1B2	1.18556e-140	0.261337	0.755	0.67	4.33926e-136	Post
JAK1	5.14594e-140	0.388121	0.446	0.338	1.88347e-135	Post
MZT2A	1.97982e-139	0.285995	0.407	0.3	7.24634e-135	Post
MARCKS	3.71719e-139	0.255012	0.497	0.38	1.36053e-134	Post
SSBP1	1.74368e-138	0.263175	0.398	0.289	6.38205e-134	Post
AKT3	5.77246e-138	0.482912	0.322	0.223	2.11278e-133	Post
COL5A1	1.32272e-137	-0.352756	0.19	0.287	4.8413e-133	Post
CSTB	1.0646e-134	0.275047	0.405	0.301	3.89655e-130	Post
MAPK10	1.12881e-134	0.559116	0.252	0.16	4.13158e-130	Post
MYC	2.5506e-134	-0.511486	0.21	0.3	9.33546e-130	Post
TUSC3	4.36462e-134	0.335563	0.261	0.168	1.59749e-129	Post
CHL1	5.68665e-133	-0.452916	0.183	0.271	2.08137e-128	Post
STAG1	9.14661e-133	0.474087	0.267	0.174	3.34775e-128	Post
CNN2	9.18428e-132	-0.453693	0.226	0.317	3.36154e-127	Post
SMIM26	5.30693e-131	0.264939	0.403	0.299	1.94239e-126	Post
MMP2	1.06162e-130	-0.409918	0.322	0.422	3.88564e-126	Post
SERPINH1	1.32382e-130	-0.423237	0.282	0.38	4.84533e-126	Post
ID4	1.88915e-129	0.278165	0.353	0.243	6.91446e-125	Post
CCN5	1.95759e-128	0.277419	0.419	0.306	7.16497e-124	Post
MT-ND6	5.46158e-125	-0.380886	0.203	0.293	1.99899e-120	Post
SDHD	8.10318e-125	0.254472	0.259	0.168	2.96585e-120	Post
H1FX	2.74127e-123	0.301021	0.473	0.365	1.00333e-118	Post
POLR1D	1.45196e-121	0.251049	0.374	0.275	5.31433e-117	Post
DDT	2.60839e-120	0.278356	0.336	0.24	9.54697e-116	Post
TRA2B	8.64041e-119	-0.432448	0.388	0.475	3.16248e-114	Post
BICC1	5.84091e-118	0.56614	0.307	0.217	2.13783e-113	Post
TGFB1I1	3.18795e-117	-0.473586	0.235	0.316	1.16682e-112	Post
ITGB1	1.06858e-116	-0.375103	0.587	0.627	3.9111e-112	Post
ITPR1	4.15627e-116	-0.461558	0.3	0.392	1.52124e-111	Post
NFKBIZ	1.72685e-114	-0.502194	0.202	0.285	6.32044e-110	Post
PLEKHA5	6.19664e-112	0.359262	0.347	0.252	2.26803e-107	Post
AUTS2	8.14467e-112	0.638516	0.32	0.237	2.98103e-107	Post
CLSTN2	1.64157e-111	-0.436183	0.228	0.316	6.00833e-107	Post
ZFP36L1	5.18629e-111	-0.383881	0.791	0.791	1.89823e-106	Post
MIR99AHG	5.34426e-111	0.585397	0.678	0.592	1.95605e-106	Post
COL4A2	3.94335e-108	-0.370978	0.29	0.377	1.44331e-103	Post
MAP3K5	2.99338e-107	0.52535	0.32	0.236	1.09561e-102	Post
APP	9.47257e-106	0.267563	0.569	0.471	3.46705e-101	Post
CPQ	2.60428e-105	0.335879	0.437	0.346	9.53193e-101	Post
LUM	4.32994e-103	0.408241	0.426	0.334	1.5848e-98	Post
PLCG2	6.58682e-103	-0.530144	0.423	0.503	2.41084e-98	Post
EHBP1	8.34693e-102	0.518308	0.357	0.274	3.05506e-97	Post
NLGN4X	1.92178e-101	-0.382751	0.175	0.253	7.03392e-97	Post
STAT3	7.47488e-101	-0.378927	0.295	0.377	2.73588e-96	Post
MALAT1	1.80437e-98	-0.285222	0.979	0.99	6.60416e-94	Post
FUS	2.30313e-96	-0.389416	0.519	0.58	8.42969e-92	Post
BTG2	1.80983e-94	-0.417601	0.415	0.49	6.62414e-90	Post
KANK2	3.12768e-94	-0.421364	0.383	0.453	1.14476e-89	Post
FLRT2	3.01304e-93	0.472926	0.367	0.282	1.1028e-88	Post
PPP1R12B	4.02006e-93	-0.393712	0.324	0.405	1.47138e-88	Post
SERPING1	1.0497e-92	-0.43014	0.586	0.601	3.84201e-88	Post
ANXA6	1.16496e-92	-0.401459	0.242	0.318	4.26386e-88	Post
PTGIS	1.93339e-91	-0.384082	0.191	0.265	7.07639e-87	Post
CFH	7.51596e-91	-0.370725	0.572	0.618	2.75092e-86	Post
SULF2	1.17485e-89	-0.345682	0.268	0.346	4.30008e-85	Post
DDX3X	7.21652e-89	-0.448451	0.447	0.514	2.64132e-84	Post
COL4A1	1.32271e-88	-0.325699	0.189	0.264	4.84125e-84	Post
C11orf96	3.32798e-88	-0.34017	0.461	0.531	1.21807e-83	Post
GADD45B	2.14269e-87	-0.530132	0.46	0.509	7.84248e-83	Post
ANGPTL1	5.86666e-87	-0.418537	0.188	0.259	2.14726e-82	Post
PEG3	1.52295e-85	-0.332135	0.712	0.739	5.57416e-81	Post
TTC28	1.47888e-84	0.490674	0.296	0.223	5.41286e-80	Post
SVIL	8.54387e-82	0.295754	0.512	0.426	3.12714e-77	Post
SBF2	4.2165e-81	0.397239	0.268	0.196	1.54328e-76	Post
RTN4	4.96805e-81	-0.407764	0.467	0.521	1.81836e-76	Post
COL18A1	2.48424e-79	-0.333479	0.322	0.4	9.09257e-75	Post
MARCKSL1	4.28279e-79	-0.370425	0.45	0.506	1.56755e-74	Post
PSD3	5.03975e-77	0.319783	0.327	0.249	1.8446e-72	Post
SLC38A2	9.65734e-76	-0.35623	0.606	0.647	3.53468e-71	Post
UBC	8.12497e-75	-0.272748	0.74	0.744	2.97382e-70	Post
VMP1	2.03968e-73	-0.398526	0.22	0.288	7.46543e-69	Post
NID1	1.19297e-71	-0.310156	0.211	0.28	4.36638e-67	Post
HSPA1A	2.14597e-70	0.392043	0.353	0.282	7.85446e-66	Post
ZFAND5	5.52344e-68	-0.430396	0.395	0.456	2.02163e-63	Post
STK3	5.30571e-67	0.376848	0.269	0.206	1.94194e-62	Post
LIMA1	6.30393e-67	-0.327907	0.224	0.29	2.3073e-62	Post
ZNF704	3.56567e-65	0.267353	0.32	0.248	1.30507e-60	Post
IGF1R	4.88835e-65	0.321991	0.303	0.234	1.78919e-60	Post
MIR100HG	5.73515e-65	0.279404	0.316	0.248	2.09912e-60	Post
JMJD1C	6.70226e-65	0.271646	0.435	0.359	2.45309e-60	Post
CCN2	8.42078e-65	-0.367714	0.214	0.277	3.08209e-60	Post
CFL1	5.26979e-64	-0.387337	0.443	0.479	1.9288e-59	Post
RBPMS	2.15176e-62	0.267934	0.429	0.354	7.87565e-58	Post
SPECC1	1.13853e-61	-0.304443	0.208	0.27	4.16712e-57	Post
TCEAL4	2.25217e-61	-0.322661	0.775	0.756	8.24316e-57	Post
THBS1	2.24845e-59	-0.377648	0.241	0.304	8.22956e-55	Post
ID3	6.97633e-59	0.416207	0.381	0.313	2.5534e-54	Post
DAAM1	7.57621e-59	-0.299164	0.207	0.268	2.77297e-54	Post
UBXN8	1.97435e-57	-0.293287	0.216	0.278	7.22631e-53	Post
KANSL1	3.07542e-57	0.268408	0.337	0.272	1.12563e-52	Post
BCLAF1	4.22151e-57	-0.34523	0.364	0.425	1.54512e-52	Post
DDIT4	8.48996e-56	0.27846	0.25	0.19	3.10741e-51	Post
ATP1A1	3.62809e-55	-0.319559	0.275	0.336	1.32792e-50	Post
MAML2	2.0841e-54	0.385292	0.256	0.2	7.62803e-50	Post
GATA6	2.29059e-54	-0.253787	0.229	0.29	8.38379e-50	Post
FTX	2.33161e-52	0.349281	0.439	0.377	8.53393e-48	Post
HSPA8	3.67663e-52	-0.311012	0.415	0.464	1.34568e-47	Post
ACTR3	5.34812e-50	-0.279831	0.202	0.258	1.95747e-45	Post
PSAP	9.10907e-49	-0.268506	0.645	0.658	3.33401e-44	Post
RPN2	1.84818e-48	-0.304889	0.246	0.304	6.76453e-44	Post
DPYSL3	5.4639e-48	-0.320578	0.368	0.423	1.99984e-43	Post
MAOB	1.53486e-46	-0.330759	0.271	0.322	5.61775e-42	Post
GTF2I	3.18465e-46	-0.313526	0.462	0.505	1.16561e-41	Post
MACF1	5.22174e-46	-0.296966	0.49	0.533	1.91121e-41	Post
EIF4G2	6.86232e-46	-0.329905	0.423	0.47	2.51168e-41	Post
IGFBP2	2.44663e-45	-0.300791	0.365	0.415	8.9549e-41	Post
LDHA	2.78445e-45	-0.321398	0.253	0.301	1.01914e-40	Post
SOD2	1.77546e-44	-0.382302	0.277	0.327	6.49836e-40	Post
MORF4L2	1.79355e-44	-0.334807	0.567	0.575	6.56459e-40	Post
KPNB1	6.16121e-44	-0.333293	0.273	0.326	2.25507e-39	Post
PPP1R14A	2.00457e-43	-0.320966	0.366	0.407	7.33692e-39	Post
SMG1	1.26585e-42	-0.272847	0.214	0.264	4.63312e-38	Post
SFRP4	1.62732e-42	-0.324465	0.227	0.277	5.95615e-38	Post
EFEMP2	4.86872e-42	-0.270241	0.229	0.28	1.782e-37	Post
SYNE2	1.21649e-41	-0.381141	0.435	0.473	4.45247e-37	Post
NUFIP2	3.27825e-41	-0.271007	0.218	0.27	1.19987e-36	Post
MYADM	1.06021e-40	-0.30166	0.283	0.332	3.88047e-36	Post
SFPQ	1.30047e-40	-0.29662	0.394	0.439	4.75984e-36	Post
NPEPPS	1.7798e-40	-0.274934	0.231	0.282	6.51425e-36	Post
PPP1R15A	2.58299e-40	-0.320567	0.32	0.363	9.454e-36	Post
MLXIP	3.15851e-40	-0.257952	0.222	0.273	1.15605e-35	Post
HTRA1	1.20496e-39	-0.291848	0.481	0.516	4.41028e-35	Post
SREK1	2.16513e-37	-0.260047	0.223	0.272	7.92461e-33	Post
MYH9	2.31635e-37	-0.252937	0.227	0.277	8.47806e-33	Post
ACTN4	5.30159e-37	-0.254839	0.282	0.334	1.94043e-32	Post
HLA-E	5.48102e-37	-0.319623	0.345	0.388	2.00611e-32	Post
RCN1	1.63671e-36	-0.263215	0.264	0.312	5.99053e-32	Post
SF1	2.50568e-36	-0.254278	0.397	0.442	9.17106e-32	Post
CSRP1	3.07273e-36	-0.268044	0.301	0.346	1.12465e-31	Post
PARVA	5.30324e-36	-0.261923	0.242	0.292	1.94104e-31	Post
FBLN1	5.29533e-35	0.346983	0.269	0.22	1.93814e-30	Post
BNC2	5.64439e-35	0.449952	0.545	0.504	2.0659e-30	Post
FOXL2	3.61217e-34	-0.25773	0.264	0.312	1.32209e-29	Post
AASS	6.14035e-34	-0.265624	0.274	0.322	2.24743e-29	Post
FGFR1	5.37231e-33	-0.28533	0.294	0.338	1.96632e-28	Post
P4HB	7.34372e-32	-0.254929	0.261	0.304	2.68788e-27	Post
GLUL	7.59184e-32	-0.336586	0.433	0.464	2.77869e-27	Post
WFS1	2.10214e-31	-0.250289	0.224	0.268	7.69405e-27	Post
BSG	2.75292e-31	-0.291465	0.373	0.411	1.0076e-26	Post
GASK1B	1.20926e-29	-0.25174	0.305	0.35	4.42602e-25	Post
ITM2A	9.88337e-29	-0.255817	0.372	0.405	3.61741e-24	Post
GAPDH	1.16432e-28	-0.277884	0.64	0.619	4.26152e-24	Post
LMNA	1.41763e-27	-0.325799	0.425	0.452	5.18865e-23	Post
PLPP3	1.43732e-27	-0.328821	0.354	0.387	5.26074e-23	Post
SCARB2	3.03631e-27	-0.25534	0.29	0.331	1.11132e-22	Post
NBL1	2.30914e-26	-0.314209	0.499	0.511	8.45167e-22	Post
ZBTB16	5.52118e-25	0.388335	0.283	0.249	2.02081e-20	Post
MT2A	3.9395e-19	-0.429358	0.241	0.271	1.4419e-14	Post
ENO1	8.22544e-19	-0.274905	0.281	0.308	3.01059e-14	Post
MIF	1.41124e-18	-0.263142	0.572	0.557	5.16529e-14	Post
HSPB1	1.24309e-16	-0.289249	0.538	0.547	4.54985e-12	Post
CAV1	4.81342e-16	-0.295152	0.441	0.445	1.76176e-11	Post
SAT1	4.95584e-14	-0.260578	0.346	0.368	1.81389e-09	Post
TPI1	1.22692e-12	-0.294331	0.332	0.345	4.49067e-08	Post
MGP	1.51019e-11	-0.317509	0.443	0.445	5.52743e-07	Post

## Sheet: 2D_theca-stromal sub
Supplementary Table 2D. Differentially expressed genes for each theca/stromal cell subpopulation.
Abbreviations: Avg_log2FC, average log2fold change; Pct.1, percentage of cells where the gene is detected in the identified cluster; Pct. 2, percentage of cells where the genes is dectected on average in other clusters; p_val_adj, p-value adjusted for multiple comparisons; SMC, smooth muscle cell.
gene	p_val	avg_log2FC	pct.1	pct.2	p_val_adj	cluster
NR4A1	0	1.88047	0.561	0.197	0	T0
JUNB	0	1.65425	0.802	0.562	0	T0
EGR1	0	1.65136	0.816	0.533	0	T0
FOS	0	1.55556	0.884	0.679	0	T0
TCEAL4	0	1.43096	0.776	0.517	0	T0
JUND	0	1.42328	0.783	0.594	0	T0
FHL2	0	1.38528	0.631	0.335	0	T0
JUN	0	1.37622	0.875	0.745	0	T0
VIM	0	1.25757	0.966	0.904	0	T0
ST13	0	1.1207	0.781	0.582	0	T0
RPS20	0	1.02486	0.821	0.591	0	T0
TMSB10	0	0.995669	0.926	0.702	0	T0
RPL3	0	0.97477	0.957	0.811	0	T0
H3F3B	0	0.908197	0.903	0.826	0	T0
RPL13A	0	0.875932	0.954	0.851	0	T0
RPS8	0	0.852939	0.98	0.928	0	T0
RPS16	0	0.82096	0.898	0.769	0	T0
EEF1A1	0	0.817462	0.985	0.931	0	T0
RPL18	0	0.797867	0.942	0.851	0	T0
RPL37A	0	0.794532	0.963	0.882	0	T0
TPT1	0	0.760372	0.957	0.875	0	T0
RPS6	0	0.747187	0.943	0.821	0	T0
RPL37	0	0.727506	0.967	0.915	0	T0
RPS27	0	0.689757	0.984	0.962	0	T0
RPL13	0	0.684115	0.984	0.948	0	T0
NXN	0	-0.606152	0.073	0.288	0	T0
CRYBG3	0	-0.665098	0.081	0.288	0	T0
PTPRS	0	-0.739899	0.081	0.299	0	T0
ADAMTS12	0	-0.747473	0.04	0.253	0	T0
ANKRD36	0	-0.824912	0.129	0.377	0	T0
ARL15	0	-0.830263	0.056	0.259	0	T0
LRBA	0	-0.830589	0.111	0.353	0	T0
PRKD1	0	-0.903717	0.052	0.263	0	T0
TIAM1	0	-0.917157	0.031	0.274	0	T0
AL139383.1	0	-0.929377	0.062	0.268	0	T0
SRPX	0	-0.951184	0.025	0.278	0	T0
GHR	0	-0.976219	0.077	0.307	0	T0
BBS9	0	-0.98558	0.099	0.334	0	T0
STARD13	0	-1.00239	0.089	0.325	0	T0
TBC1D5	0	-1.01197	0.19	0.468	0	T0
SMYD3	0	-1.01454	0.103	0.357	0	T0
PRICKLE1	0	-1.02589	0.089	0.316	0	T0
PLAGL1	0	-1.08507	0.154	0.468	0	T0
CYP1B1	0	-1.09423	0.071	0.326	0	T0
DHRS3	0	-1.13251	0.131	0.393	0	T0
PARD3	0	-1.13615	0.251	0.577	0	T0
AFF3	0	-1.15112	0.16	0.44	0	T0
LAMA4	0	-1.17131	0.187	0.504	0	T0
COLEC12	0	-1.17829	0.029	0.329	0	T0
GPHN	0	-1.21088	0.101	0.391	0	T0
DANT2	0	-1.22639	0.081	0.365	0	T0
ZEB1	0	-1.23296	0.116	0.412	0	T0
APOD	0	-1.29481	0.134	0.396	0	T0
DPYD	0	-1.3192	0.161	0.471	0	T0
LDB2	0	-1.36243	0.097	0.435	0	T0
RUNX1T1	0	-1.36855	0.107	0.412	0	T0
CPE	0	-1.37909	0.206	0.53	0	T0
H19	0	-1.40729	0.085	0.387	0	T0
ABCA9	0	-1.42463	0.151	0.425	0	T0
IMMP2L	0	-1.43435	0.204	0.526	0	T0
ESR1	0	-1.48832	0.118	0.424	0	T0
ADAMTSL1	0	-1.5071	0.047	0.286	0	T0
LRFN5	0	-1.5105	0.018	0.278	0	T0
MACROD2	0	-1.51122	0.083	0.326	0	T0
DLG2	0	-1.55846	0.198	0.52	0	T0
MEIS1	0	-1.58535	0.206	0.545	0	T0
NR2F1	0	-1.58583	0.349	0.632	0	T0
SVEP1	0	-1.62721	0.017	0.297	0	T0
ADAMTS3	0	-1.63649	0.047	0.295	0	T0
RARRES1	0	-1.64153	0.026	0.268	0	T0
UST	0	-1.65168	0.087	0.422	0	T0
SLC8A1	0	-1.67024	0.03	0.285	0	T0
ZFPM2	0	-1.69174	0.334	0.659	0	T0
NEGR1	0	-1.71196	0.16	0.429	0	T0
PID1	0	-1.75465	0.156	0.441	0	T0
RORA	0	-1.85981	0.234	0.57	0	T0
SLIT3	0	-1.86093	0.086	0.398	0	T0
NFIB	0	-1.88357	0.261	0.614	0	T0
IGFBP6	0	-1.95612	0.149	0.453	0	T0
PRKG1	0	-1.97636	0.091	0.412	0	T0
ADAMTSL3	0	-2.00252	0.046	0.326	0	T0
MGP	0	-2.12941	0.432	0.693	0	T0
ABCA10	0	-2.16177	0.262	0.605	0	T0
ADH1B	0	-2.18078	0.164	0.404	0	T0
SLIT2	0	-2.26391	0.038	0.343	0	T0
C3	0	-2.37557	0.158	0.508	0	T0
PLCB1	0	-2.49598	0.045	0.439	0	T0
IGFBP3	0	-2.59345	0.174	0.521	0	T0
FBLN1	0	-2.76279	0.243	0.736	0	T0
BICC1	1.17431e-307	-1.48792	0.269	0.556	4.29809e-303	T0
SNED1	1.27091e-307	-1.02063	0.16	0.424	4.65165e-303	T0
RPL34	4.54329e-307	0.747599	0.966	0.902	1.66289e-302	T0
CDON	7.25797e-305	-1.23507	0.146	0.392	2.65649e-300	T0
DCLK1	9.68396e-304	-1.05306	0.077	0.271	3.54443e-299	T0
RPL5	1.51742e-302	0.751327	0.937	0.829	5.5539e-298	T0
LINC01473	1.97602e-301	-0.957581	0.081	0.282	7.23243e-297	T0
FARP1	2.41225e-293	-0.623149	0.096	0.313	8.82909e-289	T0
CDKAL1	3.00345e-291	-0.850514	0.119	0.351	1.09929e-286	T0
CDK14	5.23164e-290	-0.901327	0.153	0.407	1.91483e-285	T0
TRMT11	1.43169e-288	-0.844784	0.121	0.354	5.24014e-284	T0
RBMS3	3.32326e-288	-1.37919	0.391	0.667	1.21634e-283	T0
ZNF609	1.07516e-286	-0.976537	0.149	0.398	3.9352e-282	T0
CTSC	4.03629e-286	-0.599396	0.088	0.294	1.47732e-281	T0
CEBPD	8.25567e-286	1.54723	0.624	0.354	3.02166e-281	T0
TMEM135	1.43993e-285	-0.787799	0.106	0.328	5.27029e-281	T0
CARMIL1	6.69643e-285	-0.85761	0.071	0.255	2.45096e-280	T0
RPL9	6.84927e-285	0.719587	0.936	0.857	2.5069e-280	T0
PCCA	3.79094e-284	-0.828639	0.132	0.37	1.38752e-279	T0
NAALADL2	1.13613e-281	-1.13068	0.161	0.411	4.15834e-277	T0
FBXL7	1.31886e-280	-1.09511	0.191	0.457	4.82715e-276	T0
PBX1	8.93668e-279	-1.15862	0.471	0.742	3.27091e-274	T0
RPL17	5.47626e-276	0.731768	0.936	0.815	2.00437e-271	T0
PPP3R1	5.68898e-276	-0.790879	0.114	0.337	2.08222e-271	T0
FTO	1.13507e-275	-0.782165	0.127	0.361	4.15448e-271	T0
NLGN1	6.96795e-274	-1.14863	0.086	0.282	2.55034e-269	T0
HIBADH	2.54598e-272	-0.762126	0.129	0.365	9.31856e-268	T0
ABI3BP	5.80672e-272	-1.60815	0.303	0.535	2.12532e-267	T0
RPL10	4.68891e-270	0.752736	0.974	0.928	1.71619e-265	T0
PEG3	9.09109e-270	1.14205	0.73	0.468	3.32743e-265	T0
NFAT5	1.57677e-269	-0.861498	0.152	0.396	5.77115e-265	T0
WWOX	1.1787e-266	-1.0891	0.132	0.36	4.31417e-262	T0
MAGI3	2.0927e-262	-0.637257	0.075	0.26	7.6595e-258	T0
EXT1	3.49609e-262	-0.919049	0.144	0.382	1.2796e-257	T0
SOX4	5.3651e-262	1.29074	0.681	0.45	1.96368e-257	T0
TBCK	4.5776e-261	-0.775804	0.118	0.339	1.67545e-256	T0
NR2F1-AS1	6.03832e-261	-0.968662	0.134	0.358	2.21009e-256	T0
MIR99AHG	1.73179e-260	-1.50192	0.649	0.844	6.33854e-256	T0
RPL15	4.61031e-260	0.718994	0.919	0.798	1.68742e-255	T0
EXOC4	6.93e-260	-0.867341	0.16	0.405	2.53645e-255	T0
RPL23	7.82951e-260	0.75107	0.879	0.722	2.86568e-255	T0
RPS9	1.19843e-257	0.739473	0.909	0.761	4.38639e-253	T0
RPS11	1.34528e-257	0.6945	0.899	0.789	4.92386e-253	T0
UBE2E2	1.3773e-257	-1.0106	0.145	0.375	5.04104e-253	T0
MBD5	8.24313e-257	-0.966708	0.201	0.459	3.01707e-252	T0
SDCCAG8	8.52874e-257	-0.7942	0.15	0.388	3.1216e-252	T0
FAF1	1.79164e-255	-0.718299	0.138	0.371	6.55757e-251	T0
RPL26	7.30313e-255	0.665023	0.95	0.873	2.67302e-250	T0
PTK2	2.21644e-254	-0.82521	0.206	0.469	8.1124e-250	T0
RNF144A	5.75271e-254	-0.839227	0.099	0.297	2.10555e-249	T0
BCAS3	2.20815e-251	-0.738862	0.079	0.263	8.08206e-247	T0
RPL21	3.54849e-251	0.709717	0.922	0.841	1.29878e-246	T0
RPL6	3.46966e-250	0.661092	0.926	0.811	1.26993e-245	T0
C7	7.12307e-247	-1.67783	0.577	0.8	2.60711e-242	T0
PAN3	1.19863e-246	-0.79049	0.13	0.353	4.3871e-242	T0
RPL31	2.83305e-246	0.803398	0.808	0.612	1.03692e-241	T0
REV3L	9.99381e-245	-0.768251	0.162	0.404	3.65783e-240	T0
RPL36A	5.67263e-242	0.675611	0.915	0.784	2.07624e-237	T0
SMG6	1.86595e-241	-0.854005	0.155	0.387	6.82955e-237	T0
VPS13B	3.7164e-241	-0.875464	0.204	0.456	1.36024e-236	T0
FOSB	2.74013e-240	1.52985	0.688	0.437	1.00292e-235	T0
RPS23	2.78076e-240	0.718558	0.952	0.888	1.01779e-235	T0
SSBP2	3.74629e-240	-1.14064	0.308	0.565	1.37118e-235	T0
RPS4X	4.22167e-240	0.648055	0.954	0.867	1.54518e-235	T0
PLSCR4	1.04539e-238	-1.03584	0.174	0.398	3.82623e-234	T0
COP1	2.06517e-238	-0.572275	0.079	0.259	7.55874e-234	T0
BOC	8.79691e-238	-1.07658	0.147	0.357	3.21976e-233	T0
LAMB1	3.57955e-236	-0.566426	0.098	0.292	1.31015e-231	T0
RPL38	3.8222e-236	0.623545	0.915	0.842	1.39896e-231	T0
PRKN	5.97325e-235	-0.827925	0.102	0.299	2.18627e-230	T0
OAF	9.682e-233	-0.479454	0.108	0.312	3.54371e-228	T0
FER	1.63375e-232	-0.780218	0.126	0.337	5.97969e-228	T0
TCF12	1.89379e-232	-0.839384	0.213	0.466	6.93145e-228	T0
RPL7	2.54116e-231	0.715667	0.864	0.684	9.30089e-227	T0
RERG	1.29465e-230	-1.07326	0.105	0.294	4.73854e-226	T0
STK3	1.62558e-230	-0.944293	0.241	0.497	5.94979e-226	T0
COL3A1	2.53854e-228	-1.02523	0.48	0.727	9.29132e-224	T0
CAMK2D	1.2729e-227	-0.880821	0.144	0.361	4.65896e-223	T0
RACK1	1.38835e-227	0.675397	0.899	0.77	5.08149e-223	T0
NR3C1	4.98864e-227	-0.970683	0.194	0.429	1.82589e-222	T0
MAPK10	8.22598e-226	-1.15223	0.216	0.452	3.01079e-221	T0
ACYP2	2.57572e-225	-0.646267	0.096	0.285	9.42739e-221	T0
MEIS2	7.59137e-224	-1.04583	0.218	0.463	2.77852e-219	T0
SOX5	1.9245e-223	-1.39793	0.215	0.436	7.04386e-219	T0
HIBCH	2.63211e-223	-0.632069	0.139	0.359	9.63379e-219	T0
FHIT	1.02501e-222	-0.813364	0.091	0.273	3.75162e-218	T0
HSPG2	3.36147e-222	-0.58024	0.128	0.343	1.23033e-217	T0
RPL35A	9.04699e-222	0.676131	0.927	0.857	3.31129e-217	T0
ACTG1	1.68905e-221	0.617616	0.909	0.794	6.18207e-217	T0
PRRX1	3.145e-221	-1.02331	0.144	0.341	1.1511e-216	T0
RPS3	7.90212e-221	0.654907	0.936	0.833	2.89226e-216	T0
RPS24	3.953e-219	0.568173	0.971	0.924	1.44684e-214	T0
PARD3B	6.88967e-219	-0.992392	0.175	0.399	2.52169e-214	T0
STAG1	1.12334e-218	-0.892498	0.232	0.482	4.11153e-214	T0
NCOA2	3.99071e-217	-0.715023	0.142	0.357	1.46064e-212	T0
MIPOL1	2.93834e-215	-0.731091	0.098	0.282	1.07546e-210	T0
PLXDC2	3.42503e-215	-0.902405	0.235	0.482	1.2536e-210	T0
MT-ATP8	5.87582e-215	-1.46013	0.512	0.729	2.15061e-210	T0
METTL15	1.38965e-214	-0.69672	0.108	0.299	5.08625e-210	T0
GSN	6.16633e-214	-1.58449	0.471	0.689	2.25694e-209	T0
NACA	7.85894e-214	0.656907	0.899	0.789	2.87645e-209	T0
UBR3	1.15091e-213	-0.710765	0.145	0.36	4.21245e-209	T0
PDE5A	1.44111e-213	-0.600951	0.08	0.25	5.27462e-209	T0
ROBO1	6.99833e-212	-0.636232	0.128	0.336	2.56146e-207	T0
RPL19	1.05287e-211	0.608471	0.932	0.869	3.85361e-207	T0
RPS2	8.79694e-211	0.554397	0.936	0.812	3.21977e-206	T0
GAB1	7.12786e-210	-0.801034	0.13	0.331	2.60887e-205	T0
ANKRD17	2.30697e-209	-0.69049	0.171	0.399	8.44374e-205	T0
SEC24D	3.32448e-209	-0.465265	0.087	0.264	1.21679e-204	T0
ZCCHC7	8.2142e-209	-0.867971	0.184	0.41	3.00648e-204	T0
COMMD10	1.7288e-207	-0.580969	0.111	0.305	6.32759e-203	T0
GAS5	5.78499e-206	0.863189	0.703	0.514	2.11737e-201	T0
SCMH1	5.42894e-205	-0.698901	0.12	0.314	1.98705e-200	T0
ZFP36	7.19248e-205	1.29653	0.558	0.302	2.63252e-200	T0
CCN5	9.66424e-205	1.10922	0.391	0.114	3.53721e-200	T0
RPS3A	9.05226e-204	0.61029	0.947	0.859	3.31322e-199	T0
DLC1	3.49253e-203	-0.929412	0.207	0.44	1.2783e-198	T0
AP001528.1	1.56075e-201	-0.965986	0.119	0.3	5.7125e-197	T0
TTC28	4.67411e-200	-0.857687	0.267	0.515	1.71077e-195	T0
ASCC3	1.21669e-199	-0.477224	0.095	0.275	4.45319e-195	T0
IER2	1.87397e-199	1.28089	0.648	0.448	6.85891e-195	T0
NSMCE2	2.64878e-199	-0.683772	0.112	0.3	9.69478e-195	T0
PLCL2	2.89833e-198	-0.632243	0.104	0.287	1.06082e-193	T0
BTBD9	6.20155e-197	-0.728634	0.096	0.271	2.26983e-192	T0
RPS12	8.57027e-196	0.615265	0.959	0.894	3.13681e-191	T0
RPL10A	2.56252e-195	0.624047	0.897	0.777	9.37909e-191	T0
LRRFIP2	2.59978e-194	-0.639197	0.167	0.384	9.51544e-190	T0
RPL8	3.23709e-194	0.593368	0.94	0.856	1.18481e-189	T0
APBB2	4.14457e-194	-0.839631	0.194	0.415	1.51695e-189	T0
RPL30	1.67034e-193	0.704014	0.936	0.874	6.11362e-189	T0
EXOC6B	1.71774e-193	-0.726284	0.15	0.356	6.28711e-189	T0
COL15A1	4.07801e-193	-0.693318	0.115	0.299	1.49259e-188	T0
RFX3	5.86002e-193	-0.697654	0.098	0.271	2.14482e-188	T0
RPL11	7.93455e-193	0.538272	0.966	0.917	2.90412e-188	T0
PKP4	9.23809e-193	-0.507026	0.095	0.271	3.38123e-188	T0
AUH	4.2138e-192	-0.606458	0.093	0.262	1.54229e-187	T0
RPS25	4.86014e-192	0.542282	0.924	0.868	1.77886e-187	T0
CLASP1	1.06657e-191	-0.630584	0.131	0.327	3.90375e-187	T0
SBF2	1.51369e-191	-0.789456	0.239	0.476	5.54026e-187	T0
FLRT2	6.40709e-191	-1.08502	0.331	0.573	2.34506e-186	T0
FAM172A	6.57048e-191	-0.765477	0.198	0.421	2.40486e-186	T0
ZBTB20	1.72758e-190	-1.04253	0.569	0.767	6.32311e-186	T0
RERE	6.47211e-190	-0.775097	0.268	0.509	2.36886e-185	T0
PTBP2	3.64468e-189	-0.56871	0.129	0.325	1.33399e-184	T0
PDE8A	4.24204e-189	-0.556372	0.094	0.266	1.55263e-184	T0
DCAF6	1.08309e-188	-0.6278	0.158	0.369	3.96421e-184	T0
MDK	1.83219e-186	0.837319	0.683	0.463	6.70602e-182	T0
PTCH2	1.84524e-186	-0.826676	0.105	0.279	6.75378e-182	T0
AKT3	5.40065e-186	-0.84589	0.286	0.524	1.97669e-181	T0
PTCH1	1.61244e-185	-0.611677	0.094	0.26	5.90168e-181	T0
ATP2B1	1.62096e-184	-0.543122	0.129	0.321	5.93286e-180	T0
RPL22	2.56436e-184	0.58469	0.9	0.819	9.38581e-180	T0
RESF1	6.70772e-184	1.26002	0.546	0.333	2.45509e-179	T0
PWWP3B	7.94158e-184	1.23776	0.363	0.112	2.9067e-179	T0
STAU2	8.05727e-183	-0.600705	0.099	0.271	2.94904e-178	T0
BGN	4.3889e-182	-0.489075	0.096	0.263	1.60638e-177	T0
RABGAP1L	5.15014e-182	-0.777031	0.199	0.418	1.885e-177	T0
TAGLN	7.38994e-182	1.63403	0.557	0.329	2.70479e-177	T0
BTG2	5.87897e-181	1.40618	0.437	0.205	2.15176e-176	T0
AP3B1	7.45191e-181	-0.475607	0.093	0.261	2.72747e-176	T0
SUMF1	1.25719e-179	-0.609332	0.098	0.268	4.60143e-175	T0
COG5	5.94078e-179	-0.576035	0.092	0.255	2.17439e-174	T0
KDM6A	5.4446e-178	-0.666263	0.135	0.325	1.99278e-173	T0
PHF21A	7.48376e-178	-0.631798	0.145	0.342	2.73913e-173	T0
CDC42BPA	1.14835e-177	-0.685953	0.166	0.369	4.20309e-173	T0
MED13L	1.72121e-177	-0.812081	0.327	0.571	6.29981e-173	T0
FAM13A	2.30726e-177	-0.738995	0.202	0.419	8.44481e-173	T0
VPS54	3.03561e-177	-0.491656	0.09	0.254	1.11106e-172	T0
FTX	3.68165e-177	-0.867387	0.415	0.657	1.34752e-172	T0
PHIP	5.74688e-176	-0.719693	0.261	0.499	2.10342e-171	T0
ATRNL1	6.19691e-176	-0.80711	0.121	0.302	2.26813e-171	T0
RPLP1	3.31799e-175	0.545436	0.967	0.911	1.21442e-170	T0
RPS15A	4.68346e-175	0.596393	0.932	0.85	1.71419e-170	T0
RPL7A	2.11066e-174	0.526661	0.937	0.836	7.72523e-170	T0
MATN2	4.4754e-174	-0.748325	0.293	0.518	1.63804e-169	T0
THADA	2.39139e-173	-0.484761	0.092	0.256	8.75272e-169	T0
MYO9A	4.60392e-173	-0.795226	0.224	0.44	1.68508e-168	T0
EVI5	1.10769e-172	-0.431891	0.1	0.27	4.05427e-168	T0
NR2F2-AS1	4.50869e-172	-0.836223	0.322	0.556	1.65023e-167	T0
FAM214A	2.52954e-171	-0.482319	0.111	0.288	9.25837e-167	T0
RPLP2	1.122e-170	0.514112	0.926	0.854	4.10661e-166	T0
FHL1	2.12182e-170	-0.659662	0.132	0.313	7.76606e-166	T0
PSPC1	1.66459e-169	-0.492638	0.111	0.287	6.09255e-165	T0
CEP192	5.23402e-169	-0.399056	0.093	0.257	1.91571e-164	T0
LSAMP	1.05547e-168	-1.15191	0.143	0.321	3.86313e-164	T0
DOCK4	1.56621e-168	-0.709906	0.126	0.309	5.73247e-164	T0
COL5A2	3.48198e-167	-0.682295	0.2	0.415	1.27444e-162	T0
EEF1G	6.15201e-167	0.623389	0.817	0.644	2.2517e-162	T0
WDR70	5.6252e-166	-0.492245	0.122	0.302	2.05888e-161	T0
ASPH	1.68196e-164	-0.631038	0.247	0.475	6.15616e-160	T0
C1orf21	8.5691e-164	-0.75465	0.171	0.361	3.13637e-159	T0
CLASP2	1.76367e-163	-0.662485	0.156	0.35	6.45522e-159	T0
DYNC2H1	1.99871e-163	-0.629545	0.196	0.407	7.31547e-159	T0
GADD45B	6.72556e-163	1.28191	0.478	0.26	2.46162e-158	T0
GPC3	1.44214e-162	-0.868596	0.198	0.395	5.27837e-158	T0
RPS18	2.56336e-162	0.463594	0.971	0.926	9.38215e-158	T0
CFI	3.13317e-162	-0.567938	0.11	0.277	1.14677e-157	T0
MIR100HG	8.4731e-162	-0.972461	0.293	0.498	3.10124e-157	T0
RPS27A	3.08273e-161	0.537107	0.957	0.911	1.12831e-156	T0
RPS7	3.21282e-161	0.41977	0.915	0.784	1.17592e-156	T0
PEAK1	1.0317e-160	-0.605856	0.116	0.286	3.77612e-156	T0
SPTBN1	1.83439e-160	-0.882322	0.427	0.642	6.71405e-156	T0
EIF1	2.77395e-160	0.583641	0.843	0.765	1.01529e-155	T0
PPA2	2.24796e-159	-0.387441	0.103	0.27	8.22778e-155	T0
UGGT2	2.76575e-159	-0.524876	0.113	0.283	1.01229e-154	T0
MT-ND3	2.80679e-159	0.729474	0.97	0.979	1.02731e-154	T0
JAK1	4.86395e-159	-0.768494	0.408	0.64	1.78026e-154	T0
RPL23A	1.1377e-158	0.550718	0.892	0.828	4.1641e-154	T0
MNAT1	1.23588e-158	-0.586629	0.154	0.345	4.52345e-154	T0
UTRN	1.86456e-158	-0.707925	0.242	0.458	6.82448e-154	T0
TET2	3.76942e-157	-0.548404	0.116	0.285	1.37965e-152	T0
TNKS	1.15814e-156	-0.589168	0.158	0.35	4.2389e-152	T0
C2CD5	1.10684e-155	-0.511824	0.103	0.265	4.05115e-151	T0
ECHDC1	1.17875e-155	-0.360504	0.116	0.289	4.31434e-151	T0
C11orf96	1.53308e-155	1.47188	0.481	0.279	5.61122e-151	T0
SLC9A9	2.71252e-155	-0.890962	0.124	0.287	9.92809e-151	T0
RPS13	2.8515e-155	0.599283	0.896	0.8	1.04368e-150	T0
CASK	1.27858e-154	-0.478715	0.12	0.295	4.67972e-150	T0
AUTS2	1.67318e-154	-0.783148	0.291	0.511	6.12399e-150	T0
RPS5	2.98476e-154	0.597482	0.88	0.801	1.09245e-149	T0
ITM2B	5.85935e-154	0.508946	0.851	0.795	2.14458e-149	T0
ENOSF1	8.00962e-154	-0.455641	0.131	0.311	2.9316e-149	T0
MON2	1.00657e-153	-0.578441	0.18	0.379	3.68414e-149	T0
DIAPH2	2.71324e-153	-0.72346	0.187	0.382	9.93071e-149	T0
VLDLR-AS1	4.70625e-153	-0.925502	0.217	0.41	1.72253e-148	T0
RPL14	2.12953e-152	0.553153	0.906	0.847	7.79431e-148	T0
NCOA1	2.38894e-152	-0.690111	0.219	0.428	8.74374e-148	T0
TENT2	9.0897e-152	-0.491169	0.149	0.339	3.32692e-147	T0
ARHGAP21	4.54766e-151	-0.731044	0.304	0.528	1.66449e-146	T0
HTRA1	8.7281e-151	1.00302	0.497	0.262	3.19457e-146	T0
RALGPS2	1.10887e-150	-0.634062	0.155	0.338	4.05859e-146	T0
OLA1	2.54739e-150	-0.348391	0.103	0.264	9.3237e-146	T0
EIF4G3	1.71443e-149	-0.510724	0.155	0.342	6.27497e-145	T0
DIP2C	2.64745e-149	-0.596351	0.125	0.293	9.68992e-145	T0
RPL32	2.85318e-149	0.452494	0.972	0.948	1.04429e-144	T0
TIMP3	3.70713e-149	-0.791164	0.156	0.33	1.35685e-144	T0
RPL41	4.48554e-149	0.498852	0.978	0.948	1.64175e-144	T0
RIN2	3.6389e-148	-0.579144	0.136	0.31	1.33187e-143	T0
GOLIM4	1.17261e-147	-0.447689	0.141	0.321	4.29188e-143	T0
EPB41L2	1.24611e-147	-0.708081	0.319	0.541	4.56088e-143	T0
MAP4K3	1.37935e-147	-0.592106	0.163	0.35	5.04855e-143	T0
ZNF704	4.27185e-147	-0.715388	0.291	0.503	1.56354e-142	T0
RPS29	8.37527e-147	0.54692	0.914	0.828	3.06543e-142	T0
BCKDHB	1.1612e-146	-0.546619	0.098	0.25	4.2501e-142	T0
ZFAND3	1.50159e-146	-0.541883	0.165	0.353	5.49598e-142	T0
GLI3	3.05638e-146	-0.781243	0.176	0.359	1.11867e-141	T0
NF1	7.93248e-146	-0.559459	0.19	0.391	2.90337e-141	T0
JMJD1C	8.89298e-146	-0.731613	0.409	0.626	3.25492e-141	T0
KANSL1	1.58913e-145	-0.703476	0.312	0.532	5.81639e-141	T0
ACSS3	1.77261e-145	-0.709928	0.124	0.287	6.48793e-141	T0
UQCRB	2.3005e-145	0.658247	0.736	0.583	8.42006e-141	T0
RPL24	2.56645e-145	0.509749	0.915	0.874	9.39348e-141	T0
SCFD1	4.19958e-145	-0.52866	0.163	0.352	1.53709e-140	T0
RPS15	8.11376e-145	0.459239	0.946	0.915	2.96972e-140	T0
ADGRL2	1.21142e-143	-0.576894	0.184	0.38	4.43391e-139	T0
SNHG25	2.56868e-143	-0.548737	0.178	0.369	9.40164e-139	T0
SLC44A1	4.54054e-143	-0.498996	0.125	0.292	1.66188e-138	T0
ATP10D	1.6681e-142	-0.393493	0.101	0.256	6.1054e-138	T0
PNRC1	6.73314e-142	0.773077	0.673	0.534	2.4644e-137	T0
PTEN	1.1368e-141	-0.710094	0.304	0.525	4.16078e-137	T0
ASB3	1.66618e-141	-0.438646	0.114	0.276	6.09837e-137	T0
NT5C2	1.73305e-141	-0.416598	0.11	0.27	6.34315e-137	T0
EEF2	1.84552e-141	0.631884	0.801	0.656	6.75478e-137	T0
RPLP0	2.34392e-141	0.493015	0.871	0.727	8.57897e-137	T0
BIRC6	3.58923e-141	-0.583978	0.23	0.437	1.31369e-136	T0
RB1	1.46171e-140	-0.400379	0.105	0.263	5.34999e-136	T0
CCDC18-AS1	1.73731e-140	-0.63408	0.169	0.351	6.35873e-136	T0
TRPC1	3.10578e-140	-0.68119	0.116	0.27	1.13675e-135	T0
MAGI2	1.70272e-139	-1.10948	0.195	0.373	6.23214e-135	T0
TMSB4X	5.84539e-139	0.424896	0.894	0.759	2.13947e-134	T0
RARS2	6.07219e-139	-0.377848	0.114	0.276	2.22248e-134	T0
RPL27A	1.50065e-138	0.522023	0.866	0.727	5.49253e-134	T0
ADAMTS9-AS2	2.27698e-138	-0.75222	0.314	0.522	8.33398e-134	T0
BABAM2	2.84932e-138	-0.491217	0.118	0.28	1.04288e-133	T0
ATP9B	4.35828e-138	-0.504097	0.118	0.277	1.59517e-133	T0
RPL36AL	1.29641e-136	0.681466	0.725	0.623	4.74497e-132	T0
FAU	8.6754e-136	0.553477	0.873	0.811	3.17528e-131	T0
PDS5B	1.59105e-135	-0.580623	0.227	0.432	5.82339e-131	T0
RPL12	1.59946e-135	0.445714	0.925	0.827	5.85417e-131	T0
CEP170	2.51439e-135	-0.440698	0.147	0.323	9.20294e-131	T0
ETFA	3.03617e-134	-0.348745	0.124	0.287	1.11127e-129	T0
SFRP1	4.19318e-134	-0.905115	0.275	0.47	1.53475e-129	T0
KIAA1328	5.68897e-134	-0.583888	0.125	0.284	2.08222e-129	T0
RPS14	9.19045e-134	0.480495	0.925	0.85	3.3638e-129	T0
SYNE1	2.37457e-133	-0.757881	0.363	0.576	8.69116e-129	T0
AHI1	2.85026e-133	-0.626957	0.243	0.447	1.04322e-128	T0
DYM	3.99206e-133	-0.503063	0.136	0.302	1.46114e-128	T0
SETD5	4.23368e-133	-0.500371	0.208	0.407	1.54957e-128	T0
SGMS1	8.76377e-133	-0.571409	0.108	0.257	3.20763e-128	T0
MBNL1	1.48762e-132	-0.773398	0.368	0.579	5.44484e-128	T0
NBEA	1.52947e-132	-0.630283	0.137	0.301	5.598e-128	T0
KLF2	2.76821e-132	1.08604	0.481	0.287	1.01319e-127	T0
HERC4	4.17651e-132	-0.532908	0.162	0.34	1.52864e-127	T0
GLS	1.98162e-131	-0.47975	0.185	0.374	7.25291e-127	T0
CPSF6	2.36704e-131	-0.430346	0.176	0.366	8.66362e-127	T0
CCNH	5.97805e-131	-0.677401	0.205	0.392	2.18802e-126	T0
PDZRN3	8.07271e-131	-0.817802	0.236	0.423	2.95469e-126	T0
PTMA	2.34172e-130	0.365811	0.902	0.79	8.57094e-126	T0
PPP3CA	4.36166e-130	-0.648177	0.242	0.433	1.59641e-125	T0
DENND4C	8.01798e-130	-0.503184	0.129	0.288	2.93466e-125	T0
STRN3	1.09396e-129	-0.391461	0.125	0.288	4.00401e-125	T0
RPS19	1.25464e-129	0.442531	0.932	0.86	4.59212e-125	T0
LYPLAL1	1.32837e-129	-0.466152	0.135	0.301	4.86195e-125	T0
MAML3	1.56643e-129	-0.703614	0.175	0.351	5.73329e-125	T0
BAZ2B	2.61771e-129	-0.634895	0.325	0.537	9.58108e-125	T0
ITSN1	3.26527e-129	-0.589212	0.136	0.299	1.19512e-124	T0
BRAF	4.68475e-128	-0.517896	0.153	0.325	1.71467e-123	T0
GSK3B	9.2061e-128	-0.439564	0.13	0.292	3.36952e-123	T0
RPL29	1.23431e-127	0.467414	0.923	0.838	4.51771e-123	T0
TRPS1	1.27891e-127	-0.605524	0.128	0.285	4.68095e-123	T0
RPL4	2.36746e-127	0.597273	0.782	0.598	8.66513e-123	T0
CHCHD3	3.47684e-126	-0.36581	0.113	0.267	1.27256e-121	T0
SPATS2L	3.72831e-126	-0.726901	0.245	0.43	1.3646e-121	T0
RPSA	7.38101e-126	0.547983	0.82	0.681	2.70152e-121	T0
UBE2K	1.14302e-125	-0.449931	0.183	0.368	4.18357e-121	T0
MAP4K4	1.55679e-125	-0.53583	0.178	0.356	5.698e-121	T0
CTDSPL	1.70637e-125	-0.388285	0.114	0.266	6.2455e-121	T0
ADAMTS1	1.87335e-125	0.943222	0.488	0.279	6.85665e-121	T0
SIK3	2.53434e-125	-0.549902	0.142	0.306	9.27594e-121	T0
RPL36	4.18919e-125	0.438598	0.963	0.927	1.53328e-120	T0
BMPR1A	5.51698e-125	-0.508504	0.147	0.313	2.01927e-120	T0
RICTOR	2.96512e-124	-0.494185	0.129	0.286	1.08526e-119	T0
PIBF1	3.29841e-124	-0.510233	0.138	0.299	1.20725e-119	T0
SPECC1L	3.47372e-124	-0.436638	0.128	0.286	1.27141e-119	T0
ERC1	9.35677e-124	-0.546641	0.142	0.304	3.42467e-119	T0
MKLN1	1.12153e-123	-0.575885	0.248	0.448	4.10492e-119	T0
ZNF638	1.44304e-123	-0.558422	0.309	0.52	5.28168e-119	T0
AEBP2	6.04762e-123	-0.519778	0.146	0.311	2.21349e-118	T0
PCOLCE	1.26024e-122	-0.425178	0.126	0.281	4.61262e-118	T0
MT-CO3	1.27557e-122	0.555143	0.964	0.969	4.66872e-118	T0
NBAS	1.54015e-122	-0.447654	0.124	0.28	5.63711e-118	T0
GREB1	3.08973e-122	1.06819	0.498	0.321	1.13087e-117	T0
SNHG6	8.32884e-122	0.71549	0.631	0.491	3.04844e-117	T0
SLC30A9	2.07443e-121	-0.321685	0.108	0.257	7.59264e-117	T0
ATXN1	2.2965e-121	-0.682973	0.176	0.343	8.40541e-117	T0
CFH	4.4648e-121	0.878091	0.584	0.427	1.63416e-116	T0
EIF4A2	9.28597e-121	0.656359	0.668	0.546	3.39876e-116	T0
RPL28	1.75549e-119	0.360943	0.955	0.899	6.42529e-115	T0
NPM1	1.76185e-119	0.544949	0.802	0.651	6.44855e-115	T0
DLG1	3.17836e-119	-0.375968	0.141	0.305	1.16331e-114	T0
HS2ST1	8.30739e-119	-0.388317	0.115	0.265	3.04059e-114	T0
SETBP1	1.79719e-118	-0.846513	0.157	0.307	6.5779e-114	T0
COL1A2	1.98889e-118	-0.715547	0.721	0.859	7.27955e-114	T0
FKBP10	2.21594e-118	-0.329045	0.133	0.293	8.11056e-114	T0
TRPM7	3.13323e-118	-0.433059	0.148	0.312	1.14679e-113	T0
DCN	2.01321e-117	-0.916797	0.945	0.953	7.36853e-113	T0
CSRNP3	4.09195e-117	-0.467531	0.155	0.321	1.49769e-112	T0
MPDZ	8.80285e-117	-0.615716	0.16	0.321	3.22193e-112	T0
TSHZ2	1.07642e-116	-0.874199	0.423	0.596	3.93979e-112	T0
FCHSD2	2.22659e-116	-0.482279	0.122	0.27	8.14953e-112	T0
DOCK1	8.0263e-116	-0.38256	0.169	0.343	2.93771e-111	T0
ABCA6	1.57422e-115	-0.826384	0.275	0.463	5.76181e-111	T0
RPL39	1.73669e-115	0.457255	0.938	0.881	6.35646e-111	T0
SPATA6	7.40354e-115	-0.528434	0.128	0.275	2.70977e-110	T0
COMMD1	1.59414e-114	-0.42613	0.156	0.322	5.83471e-110	T0
NOP53	2.77609e-114	0.684894	0.64	0.517	1.01608e-109	T0
SCAPER	1.47396e-113	-0.504504	0.13	0.278	5.39484e-109	T0
HSP90AB1	1.61064e-113	0.515644	0.812	0.686	5.89511e-109	T0
MYLK	3.43087e-113	1.25992	0.417	0.233	1.25573e-108	T0
NBEAL1	3.49821e-113	-0.500401	0.18	0.352	1.28038e-108	T0
BNC2	7.25966e-113	-0.772358	0.534	0.7	2.65711e-108	T0
SIL1	2.24932e-112	-0.356578	0.125	0.275	8.23272e-108	T0
RALGAPA1	2.92709e-112	-0.542158	0.228	0.411	1.07135e-107	T0
KMT2C	4.47009e-112	-0.515871	0.278	0.475	1.6361e-107	T0
VPS13D	5.38803e-112	-0.447091	0.119	0.265	1.97207e-107	T0
NCOR2	9.22719e-112	-0.36558	0.174	0.347	3.37724e-107	T0
MAPK8	9.96473e-112	-0.515967	0.133	0.285	3.64719e-107	T0
POU2F1	1.08405e-111	-0.502915	0.128	0.275	3.96771e-107	T0
CDC27	6.56625e-111	-0.323008	0.11	0.253	2.40331e-106	T0
WDR33	1.4551e-110	-0.402696	0.188	0.365	5.3258e-106	T0
NEK7	2.09496e-110	-0.511542	0.175	0.343	7.66775e-106	T0
TTC17	3.14826e-110	-0.554155	0.222	0.403	1.1523e-105	T0
MXD4	3.70491e-110	-0.272884	0.119	0.266	1.35603e-105	T0
PLD1	4.01497e-110	-0.46878	0.152	0.311	1.46952e-105	T0
GULP1	4.37017e-110	-0.582165	0.166	0.327	1.59952e-105	T0
SPIDR	6.53706e-110	-0.513743	0.161	0.324	2.39263e-105	T0
CBR4	1.50502e-109	-0.274067	0.108	0.25	5.50851e-105	T0
GSTA4	2.88946e-109	-0.34464	0.124	0.271	1.05757e-104	T0
PFDN5	3.90843e-109	0.545683	0.755	0.654	1.43052e-104	T0
CASC15	6.10956e-109	-0.722217	0.198	0.359	2.23616e-104	T0
TPP2	7.76667e-109	-0.303772	0.116	0.262	2.84268e-104	T0
RASA1	8.84154e-109	-0.382871	0.121	0.267	3.23609e-104	T0
SERPINE2	2.68488e-108	1.0097	0.413	0.227	9.82691e-104	T0
TASOR2	2.74533e-108	-0.345546	0.127	0.278	1.00482e-103	T0
TDRD3	4.43691e-108	-0.432994	0.126	0.272	1.62395e-103	T0
TCAF1	4.67398e-108	-0.45164	0.213	0.385	1.71072e-103	T0
FRYL	6.24354e-108	-0.395455	0.114	0.255	2.2852e-103	T0
NFIA	9.62588e-108	-0.673037	0.569	0.737	3.52317e-103	T0
HERC1	4.52697e-107	-0.404428	0.178	0.348	1.65692e-102	T0
ARFGEF1	4.76559e-107	-0.407048	0.137	0.288	1.74425e-102	T0
NAV3	5.21716e-107	-0.731268	0.317	0.5	1.90953e-102	T0
ITFG1	1.05575e-106	-0.472081	0.185	0.353	3.86413e-102	T0
CNTLN	1.30428e-106	-0.462153	0.17	0.334	4.7738e-102	T0
EHBP1	1.4458e-106	-0.667873	0.328	0.516	5.29177e-102	T0
UBE3C	1.88774e-106	-0.303063	0.118	0.262	6.90931e-102	T0
LRMDA	2.29866e-106	-0.554434	0.123	0.264	8.41332e-102	T0
MEG8	2.65794e-106	-0.35466	0.191	0.368	9.72831e-102	T0
AC118549.1	2.97471e-106	-0.397964	0.132	0.282	1.08877e-101	T0
ACBD6	5.09493e-106	-0.419262	0.173	0.339	1.8648e-101	T0
NREP	1.05569e-105	-0.304145	0.144	0.301	3.86392e-101	T0
ARID2	1.27696e-105	-0.406012	0.149	0.306	4.67382e-101	T0
WWC2	1.31502e-104	-0.395802	0.126	0.271	4.8131e-100	T0
ZFAS1	1.36571e-104	0.642721	0.645	0.516	4.99864e-100	T0
ABLIM1	3.11365e-104	0.790286	0.538	0.36	1.13963e-99	T0
LAMC1	7.86942e-104	-0.436547	0.193	0.363	2.88029e-99	T0
BCL2	5.20684e-103	-0.606919	0.169	0.322	1.90576e-98	T0
CAPZA1	8.35032e-103	-0.331516	0.172	0.337	3.0563e-98	T0
FNDC3B	8.97618e-103	-0.536719	0.363	0.558	3.28537e-98	T0
WDFY3	9.80765e-103	-0.414946	0.148	0.301	3.5897e-98	T0
MTX2	1.39163e-102	-0.334395	0.131	0.28	5.09351e-98	T0
PCNX1	2.8238e-102	-0.428292	0.178	0.342	1.03354e-97	T0
DENND4A	5.21143e-102	-0.435733	0.141	0.29	1.90743e-97	T0
NUMB	6.62823e-102	-0.456544	0.155	0.307	2.426e-97	T0
IGF1R	1.03953e-101	-0.561522	0.276	0.46	3.80477e-97	T0
CROCC	1.51298e-101	-0.569024	0.133	0.271	5.53767e-97	T0
RBM26	4.35729e-101	-0.405254	0.23	0.413	1.59481e-96	T0
MT-ND1	8.98924e-101	0.548865	0.92	0.912	3.29015e-96	T0
MICU2	1.4006e-100	-0.397397	0.126	0.268	5.12635e-96	T0
RPL18A	5.32851e-100	0.373605	0.933	0.864	1.95029e-95	T0
PUM3	9.22593e-100	-0.484215	0.193	0.358	3.37678e-95	T0
CSRP1	1.11717e-99	-0.584112	0.307	0.486	4.08894e-95	T0
DYNC2LI1	1.964e-99	-0.378369	0.143	0.291	7.18842e-95	T0
USP33	2.1007e-99	-0.363128	0.155	0.31	7.68877e-95	T0
COL5A1	4.31022e-99	-0.427704	0.212	0.385	1.57759e-94	T0
ATF7IP	8.63566e-99	-0.434005	0.206	0.377	3.16074e-94	T0
CLIC4	4.24269e-98	-0.366039	0.144	0.295	1.55287e-93	T0
ANKIB1	5.51481e-98	-0.440491	0.164	0.32	2.01847e-93	T0
RABEP1	1.11202e-97	-0.250764	0.128	0.273	4.07011e-93	T0
ITGAV	2.1928e-97	-0.704574	0.244	0.406	8.02587e-93	T0
CMSS1	7.08823e-97	-0.434051	0.16	0.314	2.59436e-92	T0
FAR1	1.18612e-96	-0.374733	0.147	0.296	4.34132e-92	T0
MAGED1	1.9196e-96	-0.313148	0.167	0.327	7.02594e-92	T0
CALD1	2.32476e-96	0.507748	0.832	0.789	8.50884e-92	T0
IFT88	5.14538e-96	-0.414528	0.13	0.268	1.88326e-91	T0
WRN	5.69394e-96	-0.376475	0.154	0.306	2.08404e-91	T0
SMCHD1	6.55868e-96	-0.439558	0.238	0.413	2.40054e-91	T0
RPS17	7.94185e-96	0.462484	0.788	0.59	2.9068e-91	T0
BRWD1	9.54088e-96	-0.382608	0.187	0.352	3.49206e-91	T0
PDS5A	3.33111e-95	-0.30288	0.174	0.336	1.21922e-90	T0
UBE2E3	8.28352e-95	-0.40309	0.171	0.329	3.03185e-90	T0
RBM6	2.12585e-94	-0.426041	0.214	0.384	7.78081e-90	T0
DYRK1A	8.17667e-94	-0.375452	0.175	0.333	2.99274e-89	T0
FAM13B	1.37801e-93	-0.345766	0.118	0.251	5.04364e-89	T0
YLPM1	5.07494e-93	-0.306319	0.142	0.29	1.85748e-88	T0
RBP1	5.18088e-93	0.359763	0.728	0.55	1.89626e-88	T0
ADD3	7.96095e-93	-0.474356	0.291	0.474	2.91379e-88	T0
SND1	1.10129e-92	-0.301682	0.158	0.311	4.03084e-88	T0
SUCLG2	1.14175e-92	-0.36396	0.157	0.307	4.17892e-88	T0
ANKRD36C	2.49453e-92	-0.338134	0.141	0.284	9.13023e-88	T0
RPS21	1.08476e-91	0.39722	0.92	0.888	3.97032e-87	T0
PHKB	2.84825e-91	-0.299486	0.119	0.252	1.04249e-86	T0
USP47	5.11269e-91	-0.415786	0.205	0.369	1.8713e-86	T0
ALG13	5.8003e-91	-0.379141	0.13	0.266	2.12297e-86	T0
TIMP2	6.16777e-91	0.548603	0.751	0.661	2.25746e-86	T0
ITPR2	7.27844e-91	-0.365799	0.131	0.269	2.66398e-86	T0
SEC22B	8.44808e-91	-0.285845	0.146	0.294	3.09208e-86	T0
MAML2	9.73287e-91	-0.685676	0.232	0.39	3.56233e-86	T0
MT-CYB	1.53165e-90	0.43138	0.963	0.97	5.60598e-86	T0
CMC1	2.67191e-90	-0.276471	0.117	0.25	9.77944e-86	T0
SCAF8	3.2926e-90	-0.331474	0.13	0.266	1.20512e-85	T0
COL12A1	1.27923e-89	0.697013	0.502	0.323	4.6821e-85	T0
DMXL1	2.15223e-89	-0.355514	0.135	0.272	7.87738e-85	T0
IGF1	2.38261e-89	-0.561278	0.277	0.452	8.7206e-85	T0
ARFIP1	3.53724e-89	-0.272592	0.119	0.251	1.29466e-84	T0
COA1	3.98059e-89	-0.318059	0.152	0.301	1.45694e-84	T0
FYN	6.1168e-89	-0.314135	0.123	0.258	2.23881e-84	T0
PUM2	1.51844e-88	-0.359824	0.233	0.406	5.55764e-84	T0
ZRANB2	2.15792e-88	-0.398994	0.345	0.534	7.89821e-84	T0
WWP1	2.19164e-88	-0.437613	0.136	0.271	8.02161e-84	T0
MTREX	2.48217e-88	-0.352051	0.135	0.273	9.08501e-84	T0
DOCK5	3.94323e-88	-0.276212	0.12	0.252	1.44326e-83	T0
RAP1A	5.22834e-88	-0.364207	0.153	0.298	1.91363e-83	T0
PHACTR2	6.64054e-88	-0.431129	0.207	0.362	2.4305e-83	T0
COL14A1	6.85729e-88	-0.877706	0.428	0.553	2.50984e-83	T0
ITCH	1.42139e-87	-0.299483	0.131	0.267	5.20244e-83	T0
SEPTIN11	2.20039e-87	-0.41253	0.181	0.332	8.05365e-83	T0
GPATCH8	4.46258e-87	-0.432088	0.224	0.391	1.63335e-82	T0
UBR2	4.55448e-87	-0.359153	0.152	0.296	1.66698e-82	T0
ATXN2	5.95832e-87	-0.346304	0.199	0.36	2.1808e-82	T0
MT-ATP6	6.47844e-87	0.499185	0.969	0.978	2.37118e-82	T0
ARHGEF12	1.10791e-86	-0.37474	0.169	0.32	4.05504e-82	T0
UBA52	1.31107e-86	0.420224	0.834	0.75	4.79866e-82	T0
EHMT1	2.30753e-86	-0.295066	0.151	0.296	8.44578e-82	T0
MARK3	2.4613e-86	-0.287443	0.183	0.34	9.00859e-82	T0
MAP3K5	2.50812e-86	-0.565358	0.288	0.456	9.17995e-82	T0
UBR5	2.9349e-86	-0.392024	0.217	0.382	1.0742e-81	T0
KIFAP3	3.84517e-86	-0.440517	0.152	0.288	1.40737e-81	T0
MFGE8	4.21476e-86	-0.617525	0.249	0.401	1.54264e-81	T0
MAPKAP1	8.98176e-86	-0.266318	0.125	0.259	3.28741e-81	T0
SLMAP	1.25704e-85	-0.382946	0.169	0.318	4.60088e-81	T0
SOCS3	2.98655e-85	0.897553	0.259	0.104	1.09311e-80	T0
TCF4	3.74658e-85	-0.567	0.483	0.656	1.37129e-80	T0
RAB3GAP2	4.50182e-85	-0.294008	0.121	0.251	1.64771e-80	T0
NEO1	8.83851e-85	-0.509472	0.134	0.262	3.23498e-80	T0
FNBP1	9.72644e-85	-0.4974	0.156	0.29	3.55997e-80	T0
UBE2W	1.04435e-84	-0.297165	0.127	0.259	3.82243e-80	T0
NCOA3	7.62997e-84	-0.39951	0.139	0.272	2.79265e-79	T0
FN1	8.59233e-84	0.764537	0.506	0.353	3.14488e-79	T0
SNHG32	5.2137e-83	0.68682	0.471	0.342	1.90827e-78	T0
PPP6R3	6.78366e-83	-0.357098	0.235	0.403	2.48289e-78	T0
SMARCA2	3.29841e-82	-0.589922	0.368	0.543	1.20725e-77	T0
EEF1D	9.35382e-82	0.488459	0.736	0.626	3.42359e-77	T0
TCF21	1.51964e-81	0.719608	0.411	0.256	5.56202e-77	T0
SLC7A2	2.15257e-81	0.794813	0.279	0.132	7.87863e-77	T0
TAOK3	2.62906e-81	-0.322425	0.126	0.254	9.62262e-77	T0
AFDN	2.65287e-81	-0.405865	0.153	0.288	9.70976e-77	T0
TAF15	3.15668e-81	-0.282536	0.177	0.326	1.15537e-76	T0
AR	3.4624e-81	-0.470681	0.226	0.38	1.26727e-76	T0
TOMM7	5.97487e-81	0.466443	0.726	0.666	2.18686e-76	T0
CCNY	8.92539e-81	-0.35616	0.165	0.309	3.26678e-76	T0
LINC00342	9.24565e-81	-0.338641	0.125	0.252	3.384e-76	T0
CLSTN2	2.1076e-80	0.77377	0.256	0.1	7.71403e-76	T0
SRPK2	2.5854e-80	-0.386316	0.185	0.333	9.46281e-76	T0
GIGYF2	3.80596e-80	-0.327533	0.172	0.319	1.39302e-75	T0
POLK	6.9198e-80	-0.351415	0.16	0.302	2.53271e-75	T0
CUL3	1.9002e-79	-0.295061	0.171	0.318	6.95493e-75	T0
XRRA1	2.5244e-79	-0.333952	0.14	0.271	9.23956e-75	T0
RSRC1	3.24963e-79	-0.327115	0.151	0.288	1.1894e-74	T0
MARCKSL1	5.12543e-79	0.662135	0.472	0.313	1.87596e-74	T0
HLTF	5.53994e-79	-0.289302	0.157	0.298	2.02767e-74	T0
PPP1R15A	6.57334e-79	0.767719	0.334	0.188	2.40591e-74	T0
STX8	8.51252e-79	-0.303921	0.137	0.269	3.11567e-74	T0
ANKHD1	1.57207e-78	-0.370504	0.222	0.38	5.75393e-74	T0
SNHG8	3.04311e-78	0.599113	0.56	0.421	1.11381e-73	T0
DNAJC1	3.70641e-78	-0.327446	0.129	0.256	1.35658e-73	T0
EML4	3.94282e-78	-0.317606	0.172	0.317	1.44311e-73	T0
HLA-B	6.03289e-78	-0.430979	0.258	0.415	2.2081e-73	T0
PIK3R1	6.14143e-78	-0.649713	0.261	0.408	2.24783e-73	T0
NR2F2	1.30618e-77	0.50422	0.762	0.672	4.78073e-73	T0
CFLAR	1.55739e-77	-0.343442	0.146	0.278	5.70019e-73	T0
BTF3	2.25134e-77	0.479029	0.727	0.605	8.24013e-73	T0
DICER1	2.44482e-77	-0.386098	0.201	0.351	8.94829e-73	T0
RC3H1	3.34411e-77	-0.319804	0.162	0.302	1.22398e-72	T0
ZMYM4	1.92179e-76	-0.347588	0.21	0.363	7.03396e-72	T0
RBMS1	1.92798e-76	-0.447487	0.306	0.475	7.0566e-72	T0
SLC39A10	2.28286e-76	-0.315872	0.151	0.287	8.35551e-72	T0
MYL9	3.0009e-76	0.76855	0.575	0.449	1.09836e-71	T0
HUWE1	3.16107e-76	-0.308306	0.209	0.361	1.15698e-71	T0
SENP6	3.26864e-76	-0.430063	0.311	0.48	1.19635e-71	T0
MLLT10	3.76328e-76	-0.362349	0.186	0.331	1.3774e-71	T0
AGO3	7.01299e-76	-0.286718	0.165	0.306	2.56682e-71	T0
AKAP11	1.24227e-75	-0.286936	0.143	0.274	4.54683e-71	T0
SP3	2.48585e-75	-0.309998	0.161	0.3	9.09845e-71	T0
NRK	3.22433e-75	-0.462829	0.159	0.294	1.18014e-70	T0
MAOB	4.54939e-75	0.624932	0.288	0.138	1.66512e-70	T0
CUL5	4.90692e-75	-0.317913	0.175	0.317	1.79598e-70	T0
MTR	6.52061e-75	-0.302529	0.172	0.315	2.38661e-70	T0
ERBIN	9.95347e-75	-0.356046	0.189	0.335	3.64307e-70	T0
ASAP1	1.04102e-74	-0.342123	0.174	0.314	3.81024e-70	T0
NIPBL	1.13001e-74	-0.400057	0.284	0.451	4.13596e-70	T0
RBM33	1.24958e-74	-0.270498	0.133	0.26	4.57358e-70	T0
ACTB	1.25388e-74	0.381048	0.908	0.841	4.58933e-70	T0
TLK1	1.61422e-74	-0.32303	0.183	0.324	5.9082e-70	T0
EIF4B	2.41642e-74	0.581987	0.597	0.487	8.84434e-70	T0
ABCA8	2.59468e-74	-0.719672	0.38	0.519	9.4968e-70	T0
KDM2A	3.13631e-74	-0.296141	0.157	0.294	1.14792e-69	T0
NSRP1	3.97397e-74	-0.337626	0.225	0.384	1.45451e-69	T0
EPS15	5.03357e-74	-0.351558	0.191	0.335	1.84234e-69	T0
MGA	5.04247e-74	-0.278373	0.151	0.285	1.84559e-69	T0
RHOB	8.06871e-74	0.712826	0.482	0.356	2.95323e-69	T0
DUSP1	9.63286e-74	0.740471	0.524	0.406	3.52572e-69	T0
TPM1	1.13809e-73	0.811624	0.52	0.392	4.16553e-69	T0
EBF1	2.02583e-73	-0.939534	0.233	0.357	7.41473e-69	T0
LGALS3	2.1624e-73	0.454592	0.599	0.436	7.91459e-69	T0
TPM2	2.78725e-73	0.671366	0.637	0.502	1.02016e-68	T0
CTNNB1	4.40779e-73	-0.471875	0.362	0.515	1.6133e-68	T0
ZNF518A	4.65719e-73	-0.301084	0.193	0.341	1.70458e-68	T0
PDK4	4.75975e-73	0.681167	0.407	0.253	1.74212e-68	T0
GAS6	5.13583e-73	-0.452355	0.323	0.49	1.87976e-68	T0
MAP7D3	5.37096e-73	-0.28972	0.129	0.251	1.96582e-68	T0
OSBPL8	5.82633e-73	-0.369501	0.201	0.348	2.1325e-68	T0
LUC7L2	1.0634e-72	-0.330247	0.267	0.427	3.89217e-68	T0
RUFY2	1.16547e-72	-0.300535	0.128	0.25	4.26573e-68	T0
TCF7L1	1.4328e-72	-0.425376	0.133	0.253	5.24419e-68	T0
VPS13C	1.63951e-72	-0.364193	0.264	0.425	6.00076e-68	T0
FOXJ3	2.67961e-72	-0.287316	0.145	0.273	9.80764e-68	T0
RAB1A	2.74339e-72	-0.321177	0.217	0.369	1.00411e-67	T0
R3HDM2	3.34227e-72	-0.404503	0.228	0.378	1.2233e-67	T0
ZFR	4.44773e-72	-0.296785	0.21	0.362	1.62791e-67	T0
MTAP	5.32521e-72	-0.266569	0.143	0.272	1.94908e-67	T0
XRN1	6.62991e-72	-0.369829	0.19	0.334	2.42661e-67	T0
P4HA1	8.87584e-72	-0.253739	0.199	0.348	3.24865e-67	T0
PLA2R1	1.00036e-71	-0.578693	0.143	0.257	3.66142e-67	T0
OXR1	1.22226e-71	-0.353131	0.15	0.279	4.47359e-67	T0
OGT	4.83879e-71	-0.285416	0.218	0.373	1.77104e-66	T0
TFG	7.10298e-71	-0.266152	0.174	0.315	2.59976e-66	T0
DMTF1	7.22817e-71	-0.291843	0.145	0.272	2.64558e-66	T0
REV1	7.53445e-71	-0.291166	0.142	0.268	2.75768e-66	T0
S100A10	9.50461e-71	0.546521	0.621	0.486	3.47878e-66	T0
SNX13	1.66095e-70	-0.330794	0.144	0.269	6.07924e-66	T0
TANK	1.85991e-70	-0.305786	0.168	0.304	6.80747e-66	T0
ATXN10	2.89246e-70	-0.354321	0.214	0.362	1.05867e-65	T0
GNAQ	5.56928e-70	-0.428849	0.284	0.444	2.03841e-65	T0
HNRNPA1	6.49853e-70	0.422375	0.755	0.619	2.37853e-65	T0
FNDC3A	1.69913e-69	-0.314979	0.234	0.388	6.21899e-65	T0
CD47	1.78657e-69	-0.342149	0.226	0.376	6.53904e-65	T0
NBL1	4.60208e-69	0.586305	0.502	0.363	1.68441e-64	T0
SLC35F5	4.62337e-69	-0.280351	0.155	0.287	1.6922e-64	T0
COMMD6	6.29773e-69	0.495715	0.639	0.558	2.30503e-64	T0
ZNF721	6.60154e-69	-0.282713	0.161	0.292	2.41623e-64	T0
PKDCC	1.01361e-68	-0.337585	0.162	0.287	3.70992e-64	T0
IBTK	1.72704e-68	-0.277995	0.154	0.285	6.32115e-64	T0
ROCK1	1.77167e-68	-0.332721	0.215	0.362	6.48449e-64	T0
TCEAL3	2.25826e-68	0.764274	0.385	0.267	8.26545e-64	T0
GAS1	3.02688e-68	-0.719549	0.186	0.305	1.10787e-63	T0
LCOR	5.83889e-68	-0.320227	0.175	0.309	2.13709e-63	T0
AAK1	6.74764e-68	-0.305621	0.148	0.273	2.4697e-63	T0
PTPN12	7.08094e-68	-0.277604	0.14	0.262	2.5917e-63	T0
GOLGA4	7.60232e-68	-0.316684	0.248	0.401	2.78253e-63	T0
ACTA2	9.04754e-68	1.26488	0.459	0.35	3.31149e-63	T0
TMEM161B-AS1	1.56242e-67	-0.358478	0.149	0.274	5.7186e-63	T0
LMO4	3.30178e-67	-0.365656	0.219	0.363	1.20849e-62	T0
FAM3C	3.65288e-67	-0.272044	0.15	0.276	1.33699e-62	T0
RAP1B	4.00701e-67	-0.332915	0.233	0.382	1.46661e-62	T0
FBLN5	4.15492e-67	-0.605655	0.18	0.299	1.52074e-62	T0
CREBBP	1.41263e-66	-0.312958	0.215	0.36	5.17036e-62	T0
POR	2.83642e-66	-0.349074	0.156	0.279	1.03816e-61	T0
PTPRD	3.05265e-66	-0.643051	0.147	0.261	1.1173e-61	T0
CITED2	4.86999e-66	0.621774	0.471	0.34	1.78246e-61	T0
PPIP5K2	7.34819e-66	-0.282452	0.196	0.337	2.68951e-61	T0
CTNND1	7.50103e-66	-0.33697	0.193	0.33	2.74545e-61	T0
ATXN3	8.28147e-66	-0.287101	0.145	0.268	3.0311e-61	T0
LRCH3	1.38405e-65	-0.306062	0.149	0.273	5.06576e-61	T0
NCOR1	1.96366e-65	-0.35619	0.267	0.419	7.1872e-61	T0
TNRC6B	2.51865e-65	-0.400594	0.406	0.569	9.21852e-61	T0
KIF1B	2.83852e-65	-0.261825	0.165	0.296	1.03893e-60	T0
OSBPL1A	2.93198e-65	-0.38451	0.218	0.353	1.07313e-60	T0
FTL	5.63852e-65	0.350348	0.862	0.831	2.06375e-60	T0
FBXW11	6.35224e-65	-0.323183	0.187	0.322	2.32498e-60	T0
ELF2	1.10554e-64	-0.373965	0.221	0.362	4.04639e-60	T0
ECPAS	1.20204e-64	-0.263267	0.141	0.261	4.39958e-60	T0
CHD9	1.50262e-64	-0.389872	0.381	0.544	5.49972e-60	T0
ANKRD10	5.72324e-64	-0.293041	0.212	0.355	2.09476e-59	T0
PLAAT3	6.05552e-64	0.61112	0.313	0.194	2.21638e-59	T0
SGK1	9.08191e-64	0.782092	0.365	0.245	3.32407e-59	T0
OGA	1.0936e-63	-0.341075	0.279	0.435	4.00267e-59	T0
TNPO1	1.87842e-63	-0.287052	0.191	0.328	6.8752e-59	T0
KRIT1	2.14695e-63	-0.25981	0.167	0.298	7.85806e-59	T0
RASSF8	2.708e-63	-0.472585	0.166	0.285	9.91154e-59	T0
PDCD5	2.71883e-63	-0.547065	0.308	0.428	9.9512e-59	T0
TOP2B	3.14779e-63	-0.252951	0.186	0.323	1.15212e-58	T0
NOTCH2	3.20097e-63	-0.2607	0.208	0.351	1.17159e-58	T0
RPRD2	7.66367e-63	-0.347597	0.197	0.332	2.80498e-58	T0
FBXO11	8.18256e-63	-0.316721	0.225	0.367	2.9949e-58	T0
SLC25A6	1.02619e-62	0.44536	0.604	0.439	3.75597e-58	T0
USP34	1.4264e-62	-0.358803	0.294	0.447	5.22075e-58	T0
OBSL1	2.42745e-62	0.738653	0.38	0.269	8.88472e-58	T0
PCNX4	2.43377e-62	-0.305489	0.163	0.291	8.90783e-58	T0
FNBP4	2.83034e-62	-0.290055	0.201	0.339	1.03593e-57	T0
CEP95	3.27338e-62	-0.271867	0.138	0.254	1.19809e-57	T0
CDK13	3.79888e-62	-0.370563	0.232	0.375	1.39043e-57	T0
CEBPB	6.49277e-62	0.666965	0.383	0.259	2.37642e-57	T0
CNOT2	6.50837e-62	-0.286083	0.204	0.344	2.38213e-57	T0
ZNF83	1.66667e-61	-0.296721	0.182	0.312	6.10016e-57	T0
MT-CO1	5.40181e-61	0.285171	0.967	0.972	1.97712e-56	T0
PAFAH1B1	7.16424e-61	-0.28824	0.247	0.395	2.62218e-56	T0
CCDC91	9.50519e-61	-0.377559	0.161	0.279	3.479e-56	T0
QKI	1.14398e-60	-0.381212	0.309	0.457	4.18709e-56	T0
AKAP13	1.39929e-60	-0.367116	0.277	0.427	5.12154e-56	T0
PPP2R2A	2.85952e-60	-0.279487	0.198	0.333	1.04661e-55	T0
KANK2	3.10351e-60	0.649714	0.401	0.284	1.13591e-55	T0
LRP6	3.10576e-60	-0.284923	0.172	0.298	1.13674e-55	T0
MYCBP2	3.18433e-60	-0.380254	0.318	0.47	1.16549e-55	T0
NRP2	3.84248e-60	0.768284	0.31	0.197	1.40639e-55	T0
TXNDC17	4.48171e-60	-0.276339	0.152	0.263	1.64035e-55	T0
RNF19A	1.54021e-59	-0.369506	0.232	0.367	5.63733e-55	T0
MRC2	1.67359e-59	-0.269513	0.248	0.397	6.1255e-55	T0
PIAS1	2.18093e-59	-0.382946	0.242	0.379	7.98241e-55	T0
FNIP1	2.4411e-59	-0.349769	0.208	0.339	8.93467e-55	T0
NUPR1	2.94333e-59	0.423734	0.591	0.488	1.07729e-54	T0
USP15	3.42367e-59	-0.290875	0.185	0.313	1.2531e-54	T0
NDUFAF2	3.72273e-59	-0.274465	0.188	0.319	1.36256e-54	T0
TBL1XR1	3.74822e-59	-0.353418	0.308	0.461	1.37189e-54	T0
EEA1	3.89319e-59	-0.316966	0.185	0.314	1.42495e-54	T0
ORC4	6.3254e-59	-0.296972	0.144	0.258	2.31516e-54	T0
SPPL3	6.93602e-59	-0.296422	0.178	0.304	2.53865e-54	T0
CNOT4	8.51357e-59	-0.343235	0.216	0.35	3.11605e-54	T0
MPZL1	1.32382e-58	-0.251145	0.168	0.294	4.8453e-54	T0
MAN1A2	1.53945e-58	-0.278531	0.182	0.311	5.63455e-54	T0
INTU	1.91149e-58	-0.28469	0.151	0.267	6.99626e-54	T0
CAV1	2.44082e-58	0.637586	0.443	0.31	8.93365e-54	T0
AC006115.2	2.99002e-58	0.590183	0.421	0.307	1.09438e-53	T0
COX7C	3.70462e-58	0.405976	0.736	0.634	1.35593e-53	T0
FTH1	4.34703e-58	0.318518	0.887	0.857	1.59105e-53	T0
CASC4	6.54049e-58	-0.313235	0.222	0.359	2.39388e-53	T0
ZNF148	8.2845e-58	-0.324984	0.259	0.403	3.03221e-53	T0
NDFIP1	1.0856e-57	-0.43286	0.285	0.419	3.97341e-53	T0
EPC2	1.18576e-57	-0.317615	0.154	0.27	4.34001e-53	T0
MAP4	1.2565e-57	-0.330558	0.251	0.393	4.59891e-53	T0
TBX3	1.51237e-57	-0.377593	0.144	0.251	5.53543e-53	T0
LTBP4	1.77773e-57	-0.634377	0.474	0.596	6.50667e-53	T0
PHF3	7.31532e-57	-0.413953	0.369	0.517	2.67748e-52	T0
GNG12	9.50701e-57	-0.288876	0.231	0.37	3.47966e-52	T0
NSA2	1.04295e-56	0.485704	0.581	0.47	3.81731e-52	T0
FMNL2	1.87044e-56	-0.40533	0.203	0.328	6.84599e-52	T0
XPO1	2.53452e-56	-0.340113	0.322	0.473	9.27661e-52	T0
MT-ND4	4.55534e-56	0.363256	0.965	0.971	1.6673e-51	T0
RAB3GAP1	4.83711e-56	-0.275282	0.167	0.287	1.77043e-51	T0
COL1A1	4.94853e-56	-0.99601	0.672	0.741	1.81121e-51	T0
LGALS1	8.4836e-56	0.267047	0.783	0.709	3.10508e-51	T0
NFKBIA	9.87879e-56	0.6277	0.427	0.318	3.61573e-51	T0
ARID1B	1.10908e-55	-0.372276	0.415	0.572	4.05934e-51	T0
ARHGAP6	5.15846e-55	-0.640735	0.189	0.297	1.88805e-50	T0
HELZ	6.07532e-55	-0.287826	0.21	0.34	2.22363e-50	T0
CPQ	7.03531e-55	-0.438407	0.407	0.552	2.57499e-50	T0
SPOP	7.33579e-55	-0.253955	0.19	0.317	2.68497e-50	T0
SNHG5	1.41397e-54	0.480134	0.581	0.496	5.17528e-50	T0
NAA38	1.68589e-54	-0.281329	0.228	0.352	6.17054e-50	T0
BBX	1.92795e-54	-0.383088	0.322	0.469	7.05648e-50	T0
ELF1	2.39678e-54	-0.295882	0.155	0.268	8.77244e-50	T0
RRBP1	2.55907e-54	-0.286003	0.259	0.395	9.36645e-50	T0
SNHG7	6.24041e-54	0.607388	0.455	0.363	2.28405e-49	T0
PKN2	1.17927e-53	-0.328242	0.327	0.471	4.31625e-49	T0
WNK1	1.50683e-53	-0.274788	0.188	0.313	5.51513e-49	T0
ATF2	2.55885e-53	-0.25879	0.143	0.254	9.36566e-49	T0
PTPRG	3.51649e-53	-0.280241	0.189	0.313	1.28707e-48	T0
RNF150	4.47242e-53	-0.480985	0.152	0.259	1.63695e-48	T0
TUT4	4.87656e-53	-0.27888	0.354	0.507	1.78487e-48	T0
EPC1	4.93759e-53	-0.335535	0.295	0.438	1.80721e-48	T0
ARID4B	5.35009e-53	-0.295332	0.276	0.417	1.95819e-48	T0
PHF14	7.62019e-53	-0.320453	0.283	0.424	2.78907e-48	T0
SP100	1.45611e-52	-0.332029	0.234	0.364	5.32952e-48	T0
UACA	1.82669e-52	-0.296014	0.268	0.41	6.68586e-48	T0
CCDC80	3.74392e-52	-1.06161	0.51	0.579	1.37031e-47	T0
RTN3	3.99616e-52	-0.26906	0.21	0.339	1.46263e-47	T0
ZNF280D	6.13255e-52	-0.294479	0.264	0.403	2.24457e-47	T0
TNRC6A	8.18716e-52	-0.312863	0.335	0.483	2.99658e-47	T0
POGZ	2.74919e-51	-0.279763	0.275	0.416	1.00623e-46	T0
IL6ST	3.84778e-51	-0.300073	0.372	0.521	1.40833e-46	T0
KIAA1109	8.59445e-51	-0.300147	0.287	0.427	3.14565e-46	T0
RNF130	8.75202e-51	-0.346559	0.176	0.289	3.20333e-46	T0
PPP3CB	1.11112e-50	-0.251747	0.17	0.286	4.06681e-46	T0
CIRBP	1.17177e-50	0.332826	0.752	0.721	4.28879e-46	T0
TNRC6C	1.31916e-50	-0.318486	0.152	0.257	4.82826e-46	T0
TMEM14B	2.63824e-50	-0.363502	0.31	0.441	9.65622e-46	T0
ID4	3.21715e-50	0.410488	0.322	0.189	1.17751e-45	T0
HNRNPH1	6.28795e-50	-0.30091	0.472	0.596	2.30145e-45	T0
IGFBP4	7.08277e-50	0.487345	0.633	0.548	2.59236e-45	T0
LRRC17	9.71803e-50	0.632534	0.327	0.215	3.55689e-45	T0
SOS1	1.26572e-49	-0.318567	0.225	0.349	4.63268e-45	T0
TCEAL1	1.71753e-49	0.678434	0.321	0.223	6.28633e-45	T0
ZNF644	2.1409e-49	-0.280176	0.246	0.38	7.83593e-45	T0
SARAF	2.47619e-49	0.490683	0.535	0.452	9.06308e-45	T0
SENP7	2.49312e-49	-0.295205	0.216	0.339	9.12508e-45	T0
PIK3CA	5.45651e-49	-0.261944	0.149	0.255	1.99714e-44	T0
CELF2	8.1586e-49	-0.594617	0.419	0.538	2.98613e-44	T0
EIF3E	9.4833e-49	0.41501	0.642	0.555	3.47098e-44	T0
NEAT1	5.18647e-48	0.951689	0.643	0.593	1.8983e-43	T0
KLF4	7.45759e-48	0.605272	0.311	0.191	2.72955e-43	T0
PLEKHA5	2.43344e-47	-0.494362	0.318	0.441	8.90663e-43	T0
MCL1	2.93668e-47	0.841893	0.371	0.284	1.07485e-42	T0
TXNIP	5.25976e-47	-0.516208	0.56	0.679	1.92512e-42	T0
TENT5A	9.64769e-47	-0.609387	0.217	0.315	3.53115e-42	T0
FBN1	1.19866e-46	-0.353039	0.363	0.504	4.38721e-42	T0
TTC3	1.3584e-46	-0.295262	0.495	0.619	4.97186e-42	T0
AOPEP	2.30046e-46	-0.40303	0.246	0.368	8.41993e-42	T0
ZBTB16	5.27141e-46	0.515531	0.272	0.155	1.92939e-41	T0
EEF1B2	1.24896e-45	0.30274	0.739	0.602	4.5713e-41	T0
CLEC11A	1.47488e-45	-0.25435	0.222	0.337	5.39819e-41	T0
PTGIS	1.52321e-45	-0.476123	0.206	0.307	5.57512e-41	T0
WAC	1.88541e-45	-0.254185	0.3	0.437	6.90079e-41	T0
PTPN13	2.14009e-45	-0.290514	0.169	0.275	7.83296e-41	T0
RUFY3	2.16284e-45	-0.278625	0.291	0.425	7.91621e-41	T0
UBC	2.26294e-45	0.348453	0.744	0.69	8.2826e-41	T0
TOP1	2.65824e-45	-0.259924	0.227	0.346	9.72944e-41	T0
CENPC	4.67069e-45	-0.266394	0.21	0.328	1.70952e-40	T0
PPP1R14A	5.90449e-45	0.545813	0.382	0.271	2.1611e-40	T0
NRP1	1.48627e-44	-0.267088	0.251	0.376	5.4399e-40	T0
LAMA2	1.53918e-44	-0.519752	0.311	0.434	5.63356e-40	T0
KLHDC8A	3.24295e-44	0.611372	0.364	0.269	1.18695e-39	T0
TIMM8B	4.0505e-44	-0.270184	0.186	0.286	1.48252e-39	T0
BST2	5.9781e-44	0.279624	0.73	0.696	2.18804e-39	T0
CCSER2	7.82419e-44	-0.271411	0.179	0.288	2.86373e-39	T0
EIF5A	8.2014e-44	-0.366482	0.204	0.297	3.0018e-39	T0
CAMTA1	4.00612e-43	-0.301705	0.21	0.318	1.46628e-38	T0
ARX	1.23175e-42	0.567831	0.353	0.262	4.50834e-38	T0
CACHD1	1.45364e-42	-0.400411	0.163	0.258	5.32046e-38	T0
SYNE2	2.06283e-42	0.663086	0.445	0.357	7.55016e-38	T0
AP2S1	4.81889e-42	-0.270263	0.191	0.289	1.76376e-37	T0
EPB41L4A-AS1	5.19874e-42	0.480873	0.432	0.354	1.90279e-37	T0
PKD2	5.73763e-42	-0.261471	0.178	0.284	2.10003e-37	T0
C1S	1.0445e-41	0.505682	0.629	0.566	3.82296e-37	T0
PLS3	1.32743e-41	-0.252631	0.271	0.396	4.85852e-37	T0
BMPR2	1.84404e-41	-0.383435	0.179	0.275	6.74937e-37	T0
JPX	2.15177e-41	-0.273768	0.361	0.496	7.87569e-37	T0
HMGB1	2.17284e-41	-0.495771	0.718	0.762	7.95281e-37	T0
NAP1L1	2.31804e-41	0.405691	0.661	0.552	8.48426e-37	T0
MEF2A	2.58901e-41	-0.304788	0.259	0.378	9.47602e-37	T0
BNIP3L	3.3747e-41	0.498181	0.473	0.398	1.23517e-36	T0
H2AFV	3.8843e-41	-0.253898	0.223	0.333	1.42169e-36	T0
ASXL1	8.05139e-41	-0.254085	0.216	0.332	2.94689e-36	T0
S100A13	2.43329e-40	-1.17245	0.392	0.464	8.90607e-36	T0
MT2A	3.23168e-40	-0.748133	0.243	0.358	1.18283e-35	T0
MT-ND4L	1.38202e-39	-0.40111	0.791	0.875	5.05832e-35	T0
KRT19	2.50254e-39	0.545235	0.323	0.223	9.15953e-35	T0
RBFOX2	2.62714e-39	-0.309615	0.363	0.492	9.61558e-35	T0
HSPB1	5.48408e-39	0.49122	0.538	0.464	2.00723e-34	T0
KAT6B	5.59392e-39	-0.302375	0.283	0.402	2.04743e-34	T0
MYH11	5.76425e-39	1.19978	0.258	0.173	2.10977e-34	T0
ARHGAP10	7.71905e-39	-0.270815	0.256	0.371	2.82525e-34	T0
ARGLU1	1.28452e-38	-0.267513	0.437	0.56	4.70148e-34	T0
SOD1	1.54989e-38	0.381282	0.585	0.502	5.67277e-34	T0
RNF13	3.10933e-38	-0.251018	0.19	0.294	1.13805e-33	T0
GSTM5	6.10495e-38	0.420688	0.279	0.178	2.23447e-33	T0
PPP1R12A	1.10933e-37	-0.252333	0.312	0.436	4.06027e-33	T0
SRSF11	1.4469e-37	-0.258743	0.488	0.605	5.2958e-33	T0
MICU1	1.9323e-37	-0.257723	0.206	0.312	7.07242e-33	T0
MTRNR2L12	3.13996e-37	0.345209	0.763	0.759	1.14926e-32	T0
FOXL2	4.29666e-37	0.640409	0.277	0.193	1.57262e-32	T0
AAMDC	4.7708e-37	-0.273607	0.217	0.322	1.74616e-32	T0
RPL27	5.23579e-37	0.253476	0.771	0.664	1.91635e-32	T0
SLIRP	6.23637e-37	-0.317161	0.303	0.397	2.28257e-32	T0
MT-ND5	9.73142e-37	0.379867	0.845	0.836	3.5618e-32	T0
PLPP3	8.97908e-36	-0.32215	0.353	0.475	3.28643e-31	T0
CLDN11	1.26063e-35	0.44469	0.337	0.232	4.61405e-31	T0
PEBP1	1.94689e-35	0.311769	0.629	0.52	7.12583e-31	T0
DMD	2.44859e-35	-0.337304	0.212	0.31	8.96207e-31	T0
HS3ST1	1.13791e-34	0.58625	0.304	0.224	4.16488e-30	T0
ANTXR1	1.23231e-34	-0.260948	0.299	0.417	4.51037e-30	T0
ADAMTS5	1.37376e-34	0.721378	0.371	0.289	5.02811e-30	T0
EIF3F	1.64615e-34	0.414265	0.504	0.421	6.02506e-30	T0
CNN2	2.57814e-34	0.565174	0.25	0.168	9.43624e-30	T0
CCN1	4.73707e-34	0.64892	0.395	0.31	1.73382e-29	T0
TCEAL9	8.39652e-34	0.400173	0.504	0.422	3.07321e-29	T0
N4BP2L2	1.12304e-33	-0.260005	0.609	0.725	4.11043e-29	T0
DNAJB1	1.26385e-33	0.668192	0.329	0.249	4.62583e-29	T0
MAF	1.66382e-33	0.489741	0.448	0.364	6.08973e-29	T0
PDGFD	2.01943e-33	0.271914	0.255	0.152	7.39131e-29	T0
VDAC1	2.09092e-33	-0.274369	0.199	0.28	7.65299e-29	T0
FKBP5	2.87229e-33	0.60616	0.294	0.217	1.05129e-28	T0
EIF3L	4.50411e-33	0.464462	0.438	0.364	1.64855e-28	T0
ISLR	8.39485e-33	-0.359863	0.247	0.342	3.0726e-28	T0
PCSK5	9.71948e-33	-0.364127	0.175	0.26	3.55743e-28	T0
LTBP3	1.08863e-32	-0.310677	0.298	0.404	3.98448e-28	T0
TSPAN4	2.3148e-32	-0.258311	0.28	0.39	8.47239e-28	T0
BTG1	3.17663e-32	0.370034	0.562	0.493	1.16268e-27	T0
SH3D19	3.24526e-32	-0.311406	0.294	0.402	1.1878e-27	T0
IER5L	5.5863e-32	0.393786	0.279	0.186	2.04464e-27	T0
SYTL4	1.24533e-31	0.563595	0.337	0.257	4.55805e-27	T0
S100A11	2.95485e-31	-0.323003	0.317	0.413	1.08151e-26	T0
FILIP1L	5.62316e-31	0.564377	0.389	0.322	2.05813e-26	T0
ATP5MC1	2.17534e-30	-0.299239	0.243	0.321	7.96196e-26	T0
TUBA1A	3.0437e-30	0.417582	0.531	0.462	1.11403e-25	T0
PHPT1	6.77942e-30	-0.289023	0.302	0.386	2.48134e-25	T0
POLR2L	1.14013e-29	-0.464296	0.361	0.418	4.17299e-25	T0
TIMP1	1.23554e-29	-0.462208	0.648	0.712	4.52219e-25	T0
TOMM20	1.44686e-29	0.368276	0.483	0.417	5.29567e-25	T0
ZC2HC1A	1.52907e-29	-0.277206	0.192	0.276	5.59657e-25	T0
MAST4	2.51306e-29	-0.308703	0.218	0.308	9.19806e-25	T0
EIF3H	2.97876e-29	0.379772	0.487	0.413	1.09026e-24	T0
HERPUD1	4.9921e-29	0.545887	0.368	0.303	1.82716e-24	T0
PTMS	5.19738e-29	0.300063	0.626	0.53	1.90229e-24	T0
TPI1	5.95115e-29	-0.473714	0.334	0.389	2.17818e-24	T0
MORF4L2	6.54714e-28	0.401959	0.568	0.503	2.39632e-23	T0
DANCR	1.08043e-27	0.455134	0.348	0.282	3.9545e-23	T0
ZFAND5	1.09464e-27	0.60891	0.409	0.35	4.0065e-23	T0
CDKN1C	1.81971e-27	0.355726	0.418	0.328	6.6603e-23	T0
GLUL	6.11418e-27	0.500944	0.438	0.376	2.23785e-22	T0
TSC22D1	1.4262e-26	0.44068	0.479	0.43	5.22002e-22	T0
UBXN1	4.32513e-26	0.430457	0.358	0.303	1.58304e-21	T0
MEF2C	4.35784e-26	0.473884	0.324	0.258	1.59501e-21	T0
BICD1	4.9879e-26	0.610131	0.304	0.235	1.82562e-21	T0
QSOX1	8.36533e-26	0.609554	0.304	0.239	3.0618e-21	T0
COX6C	9.33892e-26	0.28743	0.638	0.539	3.41814e-21	T0
MARCKS	2.54341e-25	-0.282661	0.462	0.55	9.30913e-21	T0
C12orf57	2.92896e-25	0.336473	0.582	0.544	1.07203e-20	T0
CCNL1	4.1723e-25	0.833601	0.463	0.421	1.5271e-20	T0
C1QBP	6.52866e-25	-0.299022	0.213	0.28	2.38956e-20	T0
KLF9	8.9656e-25	0.546721	0.284	0.214	3.2815e-20	T0
GALNT10	2.64095e-24	0.538621	0.261	0.195	9.66614e-20	T0
LHFPL6	3.04463e-24	-0.573899	0.337	0.427	1.11437e-19	T0
RANBP1	4.37471e-24	-0.348329	0.253	0.319	1.60119e-19	T0
PPP1R12B	1.30013e-23	-0.351988	0.338	0.425	4.75861e-19	T0
SYF2	1.32948e-23	0.356925	0.445	0.395	4.86601e-19	T0
IMPDH2	1.37302e-23	0.397397	0.403	0.341	5.0254e-19	T0
ING2	3.58722e-23	0.482985	0.272	0.217	1.31296e-18	T0
GYPC	5.73953e-23	0.38065	0.326	0.264	2.10072e-18	T0
ALDH7A1	8.06775e-23	0.586508	0.356	0.307	2.95288e-18	T0
PGRMC1	9.23722e-23	-0.37049	0.297	0.368	3.38092e-18	T0
GABARAP	9.54923e-23	0.296633	0.583	0.542	3.49512e-18	T0
SERPINB6	1.43593e-22	0.463051	0.347	0.292	5.25563e-18	T0
CALR	5.75309e-22	-0.260287	0.422	0.481	2.10569e-17	T0
PDGFRA	1.08042e-21	0.476999	0.599	0.565	3.95444e-17	T0
SEC61G	1.13139e-21	-0.303322	0.375	0.429	4.141e-17	T0
OSR2	1.7126e-21	0.450456	0.345	0.281	6.26828e-17	T0
SLC38A2	1.77472e-21	0.388549	0.614	0.582	6.49565e-17	T0
YBX3	1.91843e-21	0.50097	0.478	0.429	7.02166e-17	T0
HNRNPDL	2.04988e-21	0.301453	0.659	0.615	7.50276e-17	T0
CLEC2B	2.51219e-21	0.352289	0.279	0.216	9.19488e-17	T0
LRP1	2.62405e-21	-0.276302	0.537	0.631	9.60429e-17	T0
COL16A1	2.71113e-21	0.432638	0.297	0.226	9.923e-17	T0
COX4I1	2.75035e-21	0.261715	0.552	0.452	1.00666e-16	T0
PPM1K	3.22848e-21	0.449352	0.344	0.282	1.18166e-16	T0
DDX5	9.7268e-21	0.346502	0.676	0.611	3.56011e-16	T0
TPM4	1.06955e-20	0.305798	0.515	0.421	3.91467e-16	T0
SPARCL1	4.84411e-20	-0.283031	0.546	0.625	1.77299e-15	T0
SLC25A5	6.31853e-20	-0.450196	0.235	0.28	2.31265e-15	T0
C1R	8.45288e-20	0.428347	0.633	0.608	3.09384e-15	T0
UBB	1.96275e-19	-0.260291	0.524	0.563	7.18385e-15	T0
SRSF9	2.83907e-19	-0.325929	0.33	0.371	1.03913e-14	T0
ACSM3	8.23518e-19	0.268576	0.419	0.343	3.01416e-14	T0
LUM	1.12835e-18	-0.398333	0.392	0.48	4.12988e-14	T0
ATP1A1	1.13909e-18	0.457628	0.292	0.238	4.16917e-14	T0
EIF3G	2.32573e-18	0.333481	0.426	0.38	8.5124e-14	T0
MCC	2.47838e-18	0.514426	0.379	0.331	9.07113e-14	T0
GPC6	2.83727e-18	-0.414167	0.188	0.256	1.03847e-13	T0
LMNA	5.01222e-18	0.357708	0.431	0.381	1.83452e-13	T0
ECHDC2	5.16441e-18	-0.280893	0.346	0.415	1.89023e-13	T0
KLF6	2.16921e-17	0.531981	0.333	0.283	7.93951e-13	T0
NDUFB2	2.48401e-17	-0.257598	0.36	0.403	9.09172e-13	T0
DPYSL3	2.78124e-17	0.410784	0.38	0.329	1.01796e-12	T0
TGFB1I1	4.31698e-17	0.401906	0.256	0.205	1.58006e-12	T0
EPS8	5.46414e-17	0.3925	0.395	0.349	1.99993e-12	T0
CFD	1.56454e-16	-0.794598	0.276	0.196	5.72637e-12	T0
RPS10	4.19392e-16	0.346891	0.613	0.56	1.53502e-11	T0
TLE4	4.95707e-16	0.367494	0.407	0.361	1.81434e-11	T0
ATP5MC3	5.6513e-16	-0.307499	0.35	0.386	2.06843e-11	T0
TSPYL2	1.00602e-15	0.396078	0.309	0.254	3.68212e-11	T0
CNBP	3.6164e-15	0.29298	0.519	0.482	1.32364e-10	T0
TNXB	4.56048e-15	-0.349769	0.373	0.425	1.66918e-10	T0
ATP5MF	1.13452e-14	-0.2737	0.348	0.381	4.15244e-10	T0
PEG10	1.39646e-14	0.422848	0.434	0.39	5.11117e-10	T0
SERPING1	2.72857e-14	-0.413589	0.586	0.591	9.98685e-10	T0
EIF1B	6.79745e-14	0.271769	0.408	0.373	2.48793e-09	T0
MPC2	2.74529e-13	-0.251198	0.224	0.279	1.0048e-08	T0
GPX4	3.94907e-13	0.27096	0.443	0.401	1.4454e-08	T0
ENO1	4.30133e-13	-0.280705	0.285	0.321	1.57433e-08	T0
FXYD1	1.62375e-12	-0.42073	0.42	0.439	5.9431e-08	T0
NUDT4	1.96705e-12	0.463251	0.282	0.251	7.19959e-08	T0
ATP5PO	2.33629e-12	0.257262	0.391	0.346	8.55104e-08	T0
CLU	3.75553e-12	-0.303218	0.451	0.501	1.37456e-07	T0
FLNA	4.35008e-12	0.532495	0.437	0.424	1.59217e-07	T0
CAMLG	1.23527e-11	0.310623	0.338	0.31	4.52121e-07	T0
HNRNPU	1.51651e-11	0.476009	0.551	0.526	5.55059e-07	T0
CXCL12	1.53867e-11	0.376085	0.352	0.313	5.63168e-07	T0
OLFML3	1.61622e-11	0.291816	0.346	0.303	5.91551e-07	T0
MXRA8	2.31928e-11	-0.273672	0.248	0.294	8.48878e-07	T0
ITGB1	3.34309e-11	0.263545	0.599	0.549	1.2236e-06	T0
RAN	7.57643e-11	-0.457566	0.333	0.343	2.77305e-06	T0
PHB2	1.77551e-10	0.25881	0.356	0.322	6.49856e-06	T0
CST3	2.11623e-10	-0.253345	0.633	0.703	7.74562e-06	T0
S100A6	5.20258e-10	-0.58334	0.694	0.734	1.9042e-05	T0
APLP2	4.97847e-09	0.260159	0.471	0.458	0.000182217	T0
TGFBR3	5.95508e-09	0.318048	0.403	0.369	0.000217962	T0
RPL22L1	6.84165e-09	-0.283891	0.295	0.319	0.000250411	T0
CYBRD1	8.17986e-09	-0.250521	0.314	0.35	0.000299391	T0
EIF3D	1.29544e-08	0.31026	0.308	0.287	0.000474144	T0
LEPROT	3.96071e-08	0.26709	0.372	0.355	0.00144966	T0
RWDD4	6.07537e-08	0.34892	0.26	0.242	0.00222365	T0
SMDT1	7.99741e-08	0.27596	0.388	0.377	0.00292713	T0
FOXO1	1.08939e-07	0.326546	0.409	0.39	0.00398729	T0
IGBP1	2.14561e-07	0.271024	0.298	0.281	0.00785316	T0
TUBA1B	2.85565e-07	-0.480209	0.42	0.442	0.010452	T0
IRF2BPL	2.89101e-07	0.35446	0.266	0.243	0.0105814	T0
TKT	5.5688e-07	0.263582	0.311	0.285	0.0203824	T0
HSPE1	6.80211e-07	-0.460915	0.38	0.39	0.0248964	T0
PLCG2	1.85805e-06	0.350482	0.438	0.435	0.0680064	T0
DDX3X	2.45063e-06	0.355507	0.46	0.46	0.0896954	T0
ANXA1	3.93829e-06	-0.530868	0.314	0.33	0.144145	T0
PPP2CB	3.97095e-06	0.270298	0.371	0.349	0.145341	T0
PTTG1IP	6.42335e-06	0.264112	0.286	0.271	0.235101	T0
TXN	1.09344e-05	-0.323203	0.393	0.385	0.400208	T0
XAF1	1.20847e-05	0.390555	0.277	0.264	0.442314	T0
ITPR1	1.8075e-05	0.423578	0.32	0.314	0.661564	T0
RWDD1	1.912e-05	0.257367	0.326	0.314	0.69981	T0
PDCD4	2.69981e-05	0.261889	0.462	0.456	0.988158	T0
SCD5	6.03374e-05	0.297079	0.272	0.259	1	T0
SCN7A	7.44732e-05	-0.346136	0.385	0.403	1	T0
MEG3	0.000158532	0.530154	0.5	0.603	1	T0
OPTN	0.000228627	0.256825	0.282	0.273	1	T0
RAB13	0.000256347	0.255246	0.268	0.261	1	T0
MSI2	0.000278334	0.319787	0.365	0.365	1	T0
AEBP1	0.00102555	0.273842	0.514	0.531	1	T0
PODN	0.00196937	-0.290158	0.246	0.254	1	T0
MIF	0.00273914	-0.312924	0.573	0.521	1	T0
HMGB2	0.00352846	-0.426508	0.292	0.316	1	T0
HSPD1	0.00357992	-0.300558	0.426	0.414	1	T0
COL18A1	0.00629722	0.288243	0.347	0.35	1	T0
FBLN1	0	3.20054	0.892	0.244	0	T1
IGFBP3	0	3.02348	0.677	0.173	0	T1
PLCB1	0	2.90545	0.555	0.046	0	T1
C3	0	2.81863	0.693	0.156	0	T1
SLIT2	0	2.64319	0.426	0.04	0	T1
ADH1B	0	2.60108	0.519	0.163	0	T1
MGP	0	2.56371	0.791	0.432	0	T1
ABCA10	0	2.56286	0.655	0.265	0	T1
ADAMTSL3	0	2.38999	0.446	0.045	0	T1
PRKG1	0	2.3639	0.496	0.093	0	T1
IGFBP6	0	2.36201	0.599	0.148	0	T1
NFIB	0	2.29107	0.749	0.261	0	T1
RORA	0	2.26767	0.657	0.236	0	T1
SLIT3	0	2.24944	0.531	0.085	0	T1
PID1	0	2.13643	0.52	0.157	0	T1
ZFPM2	0	2.10727	0.745	0.335	0	T1
NEGR1	0	2.10267	0.482	0.162	0	T1
C7	0	2.0771	0.793	0.581	0	T1
ABI3BP	0	2.02348	0.694	0.3	0	T1
SLC8A1	0	1.99543	0.331	0.032	0	T1
GSN	0	1.98981	0.733	0.472	0	T1
ADAMTS3	0	1.98866	0.378	0.048	0	T1
RARRES1	0	1.9856	0.357	0.026	0	T1
NR2F1	0	1.97807	0.7	0.35	0	T1
MEIS1	0	1.97059	0.631	0.208	0	T1
UST	0	1.96665	0.431	0.092	0	T1
DLG2	0	1.91127	0.581	0.2	0	T1
MIR99AHG	0	1.90646	0.869	0.651	0	T1
ADAMTSL1	0	1.861	0.372	0.047	0	T1
SVEP1	0	1.8588	0.271	0.022	0	T1
BICC1	0	1.85823	0.58	0.273	0	T1
ESR1	0	1.8402	0.48	0.121	0	T1
MACROD2	0	1.83862	0.358	0.085	0	T1
LRFN5	0	1.80699	0.301	0.021	0	T1
SOX5	0	1.8056	0.556	0.213	0	T1
CNTN4	0	1.79564	0.322	0.025	0	T1
IMMP2L	0	1.78592	0.554	0.208	0	T1
CPE	0	1.73335	0.601	0.208	0	T1
RBMS3	0	1.71393	0.684	0.394	0	T1
PRR16	0	1.69776	0.266	0.018	0	T1
PI15	0	1.69771	0.291	0.049	0	T1
DPYD	0	1.66533	0.53	0.163	0	T1
RUNX1T1	0	1.66149	0.41	0.112	0	T1
DPT	0	1.6433	0.26	0.031	0	T1
PLD5	0	1.63312	0.282	0.018	0	T1
LDB2	0	1.60924	0.407	0.103	0	T1
ADGRG4	0	1.59331	0.253	0.002	0	T1
RSPO3	0	1.56776	0.305	0.005	0	T1
SEMA3D	0	1.5301	0.275	0.013	0	T1
DANT2	0	1.50424	0.386	0.084	0	T1
ZEB1	0	1.45693	0.384	0.121	0	T1
GPHN	0	1.45498	0.388	0.105	0	T1
PDE3A	0	1.44545	0.27	0.038	0	T1
DHRS3	0	1.4413	0.418	0.133	0	T1
CYP1B1-AS1	0	1.43508	0.28	0.027	0	T1
PARD3	0	1.42746	0.583	0.256	0	T1
BOC	0	1.41593	0.448	0.147	0	T1
ZBTB20	0	1.39979	0.799	0.571	0	T1
BCHE	0	1.35907	0.28	0.009	0	T1
PRRX1	0	1.35633	0.451	0.143	0	T1
PLSCR4	0	1.35428	0.46	0.175	0	T1
ANKS1B	0	1.34501	0.25	0.027	0	T1
DCN	0	1.34477	0.988	0.944	0	T1
COLEC12	0	1.34009	0.277	0.036	0	T1
DCLK1	0	1.31121	0.308	0.078	0	T1
CYP1B1	0	1.26227	0.312	0.075	0	T1
LINC01798	0	1.23351	0.273	0.034	0	T1
SPRY1	0	1.10678	0.259	0.056	0	T1
CD9	0	1.08278	0.27	0.05	0	T1
RPLP2	0	-0.85668	0.813	0.926	0	T1
RPL28	0	-0.856954	0.87	0.955	0	T1
RPL11	0	-0.918254	0.893	0.966	0	T1
RPS24	0	-0.927074	0.9	0.972	0	T1
RPL34	0	-0.93219	0.875	0.966	0	T1
RPL9	0	-0.932771	0.821	0.936	0	T1
ACTG1	0	-0.93503	0.738	0.91	0	T1
RPL19	0	-0.954985	0.829	0.933	0	T1
RPS19	0	-0.979792	0.822	0.932	0	T1
RPL37	0	-1.01157	0.893	0.967	0	T1
RPS23	0	-1.01436	0.857	0.952	0	T1
RPL12	0	-1.01857	0.779	0.926	0	T1
RPS18	0	-1.02017	0.904	0.971	0	T1
RPL13	0	-1.02995	0.932	0.984	0	T1
RPS12	0	-1.03286	0.863	0.959	0	T1
RPL10A	0	-1.03498	0.714	0.898	0	T1
PTMA	0	-1.04212	0.727	0.903	0	T1
RPS3A	0	-1.05104	0.814	0.947	0	T1
RPLP1	0	-1.05592	0.886	0.968	0	T1
RPL5	0	-1.05992	0.779	0.937	0	T1
TPT1	0	-1.07704	0.839	0.957	0	T1
RACK1	0	-1.08677	0.707	0.9	0	T1
RPL6	0	-1.09721	0.759	0.927	0	T1
RPLP0	0	-1.12571	0.648	0.872	0	T1
RPL37A	0	-1.13692	0.85	0.963	0	T1
RPL13A	0	-1.14734	0.809	0.954	0	T1
RPL18	0	-1.15049	0.814	0.942	0	T1
RPL23	0	-1.1513	0.641	0.88	0	T1
EEF1A1	0	-1.15708	0.913	0.985	0	T1
RPL36A	0	-1.16035	0.72	0.915	0	T1
RPL15	0	-1.17028	0.744	0.92	0	T1
RPS6	0	-1.17169	0.77	0.944	0	T1
RPS4X	0	-1.17453	0.826	0.954	0	T1
RPS16	0	-1.17611	0.707	0.899	0	T1
RPL26	0	-1.18212	0.833	0.951	0	T1
RPS3	0	-1.18443	0.784	0.936	0	T1
RPL31	0	-1.18601	0.498	0.81	0	T1
RPL17	0	-1.189	0.763	0.936	0	T1
RPS9	0	-1.20341	0.689	0.91	0	T1
RPS8	0	-1.20472	0.907	0.98	0	T1
VIM	0	-1.22001	0.893	0.966	0	T1
RPL7	0	-1.23022	0.595	0.865	0	T1
TMSB4X	0	-1.23447	0.688	0.895	0	T1
RPL7A	0	-1.24876	0.782	0.938	0	T1
RPS20	0	-1.28657	0.479	0.822	0	T1
RPS2	0	-1.35719	0.75	0.936	0	T1
RPS7	0	-1.41807	0.712	0.916	0	T1
RPL3	0	-1.51133	0.751	0.957	0	T1
TCEAL4	0	-1.60717	0.395	0.776	0	T1
FHL2	0	-1.69326	0.154	0.634	0	T1
TMSB10	0	-1.9731	0.6	0.927	0	T1
APOE	0	-2.42895	0.093	0.627	0	T1
RPS15A	2.36207e-305	-1.02228	0.811	0.932	8.64543e-301	T1
MT-ATP8	3.14447e-305	1.84289	0.737	0.515	1.15091e-300	T1
CDON	1.91579e-304	1.54841	0.418	0.148	7.01197e-300	T1
RPL21	2.54724e-304	-0.968772	0.803	0.923	9.32317e-300	T1
PEG3	4.17558e-303	-1.41426	0.311	0.732	1.5283e-298	T1
SSBP2	4.3111e-302	1.4914	0.602	0.311	1.57791e-297	T1
NACA	1.27156e-300	-0.971469	0.73	0.9	4.65403e-296	T1
RPL29	5.68373e-299	-0.997119	0.793	0.923	2.0803e-294	T1
ABCA9	1.18115e-295	1.73298	0.422	0.155	4.32312e-291	T1
BBS9	2.03343e-293	1.26007	0.343	0.102	7.44257e-289	T1
RPL27A	3.45134e-293	-1.00366	0.648	0.867	1.26323e-288	T1
EEF1G	2.75349e-289	-1.0773	0.541	0.818	1.0078e-284	T1
TFPI2	1.13315e-288	1.46192	0.274	0.07	4.14743e-284	T1
RPL10	2.76953e-288	-0.922751	0.91	0.974	1.01367e-283	T1
RPL8	8.16362e-287	-0.889686	0.817	0.94	2.98797e-282	T1
SLC24A3	1.02264e-284	1.27319	0.317	0.089	3.74297e-280	T1
RPL35A	1.84436e-284	-0.95083	0.825	0.927	6.75053e-280	T1
RPS14	7.06918e-283	-0.936225	0.809	0.925	2.58739e-278	T1
RPS17	1.30473e-279	-1.13404	0.463	0.79	4.77545e-275	T1
RPS11	1.38175e-279	-0.885793	0.732	0.899	5.05736e-275	T1
ST13	3.50223e-279	-1.1736	0.48	0.782	1.28185e-274	T1
PBX1	4.61347e-279	1.42711	0.721	0.476	1.68858e-274	T1
JUND	2.58304e-272	-1.46226	0.498	0.784	9.45418e-268	T1
NR4A1	2.37693e-271	-1.80243	0.15	0.558	8.69979e-267	T1
RPL32	2.25239e-268	-0.759939	0.936	0.972	8.24399e-264	T1
NAALADL2	1.40064e-267	1.43257	0.431	0.164	5.12647e-263	T1
JUNB	6.96029e-267	-1.47349	0.533	0.8	2.54753e-262	T1
RERG	1.62223e-266	1.38644	0.336	0.106	5.93754e-262	T1
EGR1	3.34603e-266	-1.45058	0.531	0.812	1.22468e-261	T1
AP001528.1	1.87186e-265	1.26609	0.355	0.12	6.8512e-261	T1
RNF144A	4.63669e-265	1.11094	0.328	0.1	1.69708e-260	T1
APOD	1.95146e-263	1.42718	0.384	0.138	7.14254e-259	T1
PARD3B	4.22004e-261	1.32197	0.445	0.177	1.54458e-256	T1
RPS27	8.52409e-261	-0.703791	0.955	0.984	3.1199e-256	T1
LSAMP	8.16536e-259	1.51874	0.395	0.142	2.9886e-254	T1
RPL18A	3.82222e-258	-0.840127	0.829	0.934	1.39897e-253	T1
FOS	9.77443e-257	-1.32797	0.675	0.881	3.57754e-252	T1
MAPK10	2.09686e-256	1.4847	0.487	0.218	7.67471e-252	T1
AFF3	7.41878e-256	1.40447	0.421	0.165	2.71535e-251	T1
RPL4	1.58912e-254	-1.05051	0.479	0.784	5.81633e-250	T1
SOX4	1.06428e-253	-1.40595	0.318	0.683	3.89537e-249	T1
PLPP1	6.13908e-253	1.12024	0.274	0.076	2.24696e-248	T1
RPL38	2.94683e-250	-0.777354	0.8	0.915	1.07857e-245	T1
GAS5	2.10915e-247	-1.14972	0.383	0.705	7.7197e-243	T1
PRICKLE1	5.34913e-247	1.26416	0.301	0.093	1.95784e-242	T1
RPL23A	1.19727e-246	-0.853043	0.782	0.893	4.38212e-242	T1
RPS13	4.34403e-242	-0.929349	0.753	0.897	1.58996e-237	T1
NR2F1-AS1	3.25151e-241	1.25158	0.372	0.137	1.19008e-236	T1
ZNF609	4.92089e-241	1.25559	0.398	0.153	1.8011e-236	T1
H19	1.42543e-240	1.25673	0.301	0.092	5.21722e-236	T1
RPL39	3.22996e-239	-0.891684	0.853	0.939	1.1822e-234	T1
RPL22	5.25734e-239	-0.805233	0.77	0.901	1.92424e-234	T1
GHR	1.30381e-237	1.15333	0.28	0.082	4.77206e-233	T1
LINC01473	1.93698e-235	1.21382	0.283	0.084	7.08956e-231	T1
RPL41	2.03165e-235	-0.777515	0.937	0.978	7.43604e-231	T1
RBP1	1.21194e-234	-1.25303	0.407	0.731	4.43582e-230	T1
ANKRD36	3.91181e-233	1.04188	0.367	0.133	1.43176e-228	T1
VLDLR-AS1	1.15261e-232	1.28526	0.481	0.217	4.21868e-228	T1
RPSA	9.90692e-232	-0.942043	0.595	0.821	3.62603e-227	T1
NPAS3	1.76637e-231	1.25496	0.266	0.076	6.46508e-227	T1
CDK14	6.60717e-229	1.15817	0.398	0.157	2.41829e-224	T1
FTX	2.35719e-228	1.19013	0.674	0.418	8.62755e-224	T1
RPL30	1.09547e-226	-0.900862	0.842	0.937	4.00954e-222	T1
RPS25	1.64938e-226	-0.718982	0.834	0.924	6.03689e-222	T1
RPS27A	1.30253e-224	-0.76254	0.888	0.957	4.76738e-220	T1
STARD13	2.48956e-224	1.2103	0.293	0.093	9.11203e-220	T1
C11orf96	1.2382e-222	-1.79144	0.118	0.484	4.53193e-218	T1
CEBPD	1.66152e-222	-1.45451	0.279	0.623	6.08132e-218	T1
NPM1	1.16948e-221	-0.927418	0.558	0.803	4.28043e-217	T1
MIR100HG	2.40378e-221	1.30909	0.539	0.295	8.79807e-217	T1
RPS5	9.92153e-221	-0.870402	0.751	0.88	3.63138e-216	T1
NFIA	1.50968e-220	1.02075	0.767	0.57	5.52557e-216	T1
NR3C1	1.25128e-219	1.27387	0.437	0.197	4.57981e-215	T1
COL14A1	6.9111e-219	1.26026	0.655	0.426	2.52953e-214	T1
BNC2	9.46156e-219	1.14158	0.742	0.535	3.46303e-214	T1
RPL14	5.19903e-218	-0.786452	0.81	0.907	1.9029e-213	T1
FBXL7	1.95585e-216	1.3267	0.445	0.196	7.15862e-212	T1
CDKAL1	2.053e-214	1.07727	0.341	0.123	7.51417e-210	T1
STAR	2.96332e-214	-1.42686	0.074	0.43	1.08461e-209	T1
RPS15	3.36236e-213	-0.673991	0.896	0.946	1.23066e-208	T1
AKT3	1.12758e-210	1.16352	0.541	0.289	4.12707e-206	T1
ADAMTS9-AS2	5.25573e-210	1.11607	0.583	0.315	1.92365e-205	T1
VPS13B	2.00976e-208	1.11847	0.454	0.208	7.35593e-204	T1
HSP90AB1	7.22226e-208	-0.87614	0.597	0.813	2.64342e-203	T1
RESF1	2.07127e-205	-1.37717	0.194	0.548	7.58107e-201	T1
FLRT2	4.70783e-204	1.41853	0.569	0.335	1.72311e-199	T1
H3F3B	1.45582e-203	-0.791945	0.801	0.903	5.32845e-199	T1
BTG2	1.90332e-201	-1.5168	0.097	0.438	6.96633e-197	T1
SNED1	1.59098e-199	1.21521	0.39	0.165	5.82316e-195	T1
MBD5	1.47987e-197	1.19531	0.441	0.205	5.41646e-193	T1
MEIS2	2.15747e-197	1.34749	0.453	0.222	7.89655e-193	T1
PLAGL1	5.02995e-197	1.17218	0.383	0.162	1.84101e-192	T1
RPL36	2.01805e-196	-0.660485	0.91	0.964	7.38626e-192	T1
TBC1D5	7.8981e-196	1.1736	0.425	0.196	2.89078e-191	T1
SLC9A9	4.70905e-193	1.18573	0.328	0.125	1.72356e-188	T1
RPS29	1.39092e-192	-0.763152	0.795	0.914	5.09091e-188	T1
UBE2E2	2.96464e-191	1.28883	0.358	0.149	1.08509e-186	T1
RPL24	2.76193e-190	-0.700609	0.842	0.915	1.0109e-185	T1
UQCRB	1.66187e-188	-0.898398	0.478	0.738	6.08263e-184	T1
FAT4	3.66338e-187	1.08634	0.262	0.085	1.34083e-182	T1
LAMA4	4.8849e-187	1.25072	0.416	0.195	1.78792e-182	T1
JUN	4.3602e-186	-1.17426	0.724	0.873	1.59588e-181	T1
NFAT5	2.60584e-185	1.08669	0.37	0.157	9.53763e-181	T1
RPL35	2.55747e-184	-0.620882	0.824	0.925	9.36061e-180	T1
SETBP1	3.14705e-183	1.16013	0.369	0.157	1.15185e-178	T1
DENND2A	2.56329e-181	0.892548	0.252	0.08	9.38189e-177	T1
CASC15	5.71557e-181	1.05974	0.43	0.198	2.09196e-176	T1
TRPC1	8.3508e-180	0.943933	0.314	0.117	3.05648e-175	T1
SNHG29	3.57291e-179	-0.963028	0.511	0.74	1.30772e-174	T1
EEF1B2	5.31679e-178	-0.879716	0.491	0.741	1.946e-173	T1
PTPRS	7.78657e-178	0.922306	0.259	0.086	2.84996e-173	T1
SLC25A6	1.28733e-177	-0.973281	0.287	0.608	4.71176e-173	T1
ABLIM1	5.03472e-177	-1.08867	0.202	0.542	1.84276e-172	T1
MARCKSL1	1.38039e-176	-1.09714	0.149	0.476	5.05237e-172	T1
EEF2	1.69636e-176	-0.836868	0.564	0.802	6.20883e-172	T1
KLF12	2.15936e-175	0.999336	0.271	0.093	7.90347e-171	T1
JAK1	3.28478e-174	1.0589	0.613	0.413	1.20226e-169	T1
LRBA	6.23086e-174	0.969486	0.307	0.116	2.28056e-169	T1
GPC3	1.53866e-173	1.15172	0.416	0.2	5.63164e-169	T1
MYO9A	2.56282e-173	1.08279	0.448	0.227	9.38018e-169	T1
CCN5	2.71705e-173	-1.13879	0.077	0.389	9.94467e-169	T1
STAG1	1.09254e-172	1.16003	0.456	0.237	3.99879e-168	T1
C1orf21	2.56218e-172	1.03128	0.382	0.173	9.37782e-168	T1
SMG6	8.79542e-172	1.10619	0.363	0.16	3.21921e-167	T1
FTO	9.25792e-172	1.00637	0.328	0.131	3.38849e-167	T1
PCCA	6.81682e-171	1.02905	0.334	0.136	2.49502e-166	T1
PRKN	3.82534e-170	1.05185	0.291	0.105	1.40011e-165	T1
RFX3	5.82704e-170	0.926238	0.281	0.1	2.13276e-165	T1
HNRNPA1	5.01509e-169	-0.823668	0.515	0.757	1.83557e-164	T1
CCDC80	5.28486e-168	1.46997	0.661	0.507	1.93431e-163	T1
EXOC4	6.95472e-166	1.05989	0.371	0.165	2.5455e-161	T1
STK3	1.21284e-165	1.16797	0.46	0.247	4.43912e-161	T1
TCF12	2.37233e-165	1.0578	0.435	0.218	8.68295e-161	T1
PWWP3B	1.1095e-164	-1.22033	0.063	0.361	4.06087e-160	T1
TMEM135	1.43855e-164	0.969285	0.293	0.111	5.26525e-160	T1
CAMK2D	3.37728e-164	1.13776	0.342	0.148	1.23612e-159	T1
TRMT11	4.88256e-164	1.06102	0.311	0.126	1.78707e-159	T1
UBA52	3.88483e-163	-0.703196	0.688	0.835	1.42189e-158	T1
TIMP3	4.50317e-163	1.05538	0.356	0.158	1.6482e-158	T1
NLGN1	4.76193e-163	1.37	0.258	0.09	1.74291e-158	T1
PPP3R1	7.01991e-163	1.00543	0.302	0.119	2.56936e-158	T1
MED13L	1.91446e-161	1.0657	0.549	0.332	7.00712e-157	T1
APBB2	1.93847e-161	1.07533	0.408	0.198	7.095e-157	T1
PDZRN3	3.16966e-161	1.13887	0.456	0.238	1.16013e-156	T1
RPL27	3.86231e-161	-0.767354	0.57	0.773	1.41364e-156	T1
MDK	2.43251e-160	-0.861663	0.387	0.683	8.90322e-156	T1
TTC28	8.90171e-160	1.09972	0.49	0.272	3.25812e-155	T1
GAB1	3.66832e-159	1.06201	0.32	0.133	1.34264e-154	T1
WWOX	4.14404e-159	1.31946	0.325	0.136	1.51676e-154	T1
UTRN	1.0465e-158	0.984052	0.463	0.245	3.83031e-154	T1
NR2F2-AS1	2.1927e-158	1.10974	0.539	0.326	8.02551e-154	T1
ACTB	1.92169e-157	-0.706803	0.805	0.908	7.0336e-153	T1
SPTBN1	3.37048e-157	1.13668	0.614	0.431	1.23363e-152	T1
SBF2	6.48196e-157	1.03394	0.459	0.243	2.37246e-152	T1
SYNE1	8.80047e-157	1.06374	0.572	0.367	3.22106e-152	T1
NR3C2	2.99116e-155	0.959772	0.25	0.087	1.09479e-150	T1
LTBP4	1.17939e-154	1.00663	0.665	0.473	4.31667e-150	T1
NCOA2	5.68248e-154	0.946858	0.338	0.146	2.07985e-149	T1
BTF3	2.31513e-152	-0.816496	0.51	0.729	8.47362e-148	T1
SCMH1	3.82083e-151	0.92852	0.303	0.123	1.39846e-146	T1
FER	5.38341e-151	0.988498	0.312	0.13	1.97038e-146	T1
FOXL2	2.21906e-149	-1.01071	0.021	0.283	8.12197e-145	T1
SDCCAG8	2.22112e-148	1.00783	0.342	0.156	8.12951e-144	T1
TBCK	5.51124e-148	0.970039	0.301	0.123	2.01717e-143	T1
FAU	2.91762e-147	-0.67572	0.769	0.873	1.06788e-142	T1
EMX2	2.36063e-146	0.985545	0.258	0.096	8.64014e-142	T1
MAGI2	1.8145e-145	1.43703	0.388	0.197	6.64126e-141	T1
IGFBP2	8.12745e-145	-1.19633	0.106	0.389	2.97473e-140	T1
UBR3	1.64411e-144	0.938588	0.336	0.149	6.01761e-140	T1
EXOC6B	1.64164e-142	0.952384	0.342	0.153	6.00857e-138	T1
SMYD3	1.93149e-142	1.10203	0.278	0.11	7.06945e-138	T1
JMJD1C	4.48259e-142	0.970575	0.598	0.413	1.64067e-137	T1
GREB1	5.48266e-142	-1.06547	0.198	0.5	2.00671e-137	T1
GADD45B	6.74639e-142	-1.22823	0.197	0.477	2.46925e-137	T1
MT-ND4L	1.94667e-141	0.702033	0.892	0.791	7.12501e-137	T1
ATXN1	4.48503e-141	0.972869	0.371	0.177	1.64157e-136	T1
AOX1	1.16924e-140	0.95887	0.262	0.1	4.27955e-136	T1
TCF21	7.99667e-140	-0.948096	0.127	0.414	2.92686e-135	T1
NRP2	9.99363e-139	-0.936005	0.05	0.314	3.65777e-134	T1
TAGLN	1.46485e-138	-1.57693	0.291	0.555	5.36151e-134	T1
TPM2	4.05406e-138	-1.03496	0.379	0.639	1.48383e-133	T1
AUTS2	2.01309e-137	1.05203	0.496	0.295	7.36811e-133	T1
TPM1	3.88266e-137	-1.13412	0.245	0.524	1.42109e-132	T1
BTBD9	1.12859e-136	0.938508	0.259	0.099	4.13073e-132	T1
RABGAP1L	1.57111e-136	1.01897	0.397	0.203	5.75044e-132	T1
ZFP36	1.7344e-136	-1.14906	0.287	0.555	6.34807e-132	T1
STMN1	2.57475e-136	-0.847937	0.145	0.437	9.42383e-132	T1
PPP1R14A	2.99849e-136	-0.917199	0.107	0.386	1.09748e-131	T1
DIAPH2	1.02386e-135	0.989939	0.38	0.19	3.74742e-131	T1
MYL9	1.3545e-135	-1.0819	0.304	0.579	4.95762e-131	T1
AC006115.2	3.06702e-134	-0.877012	0.139	0.426	1.12256e-129	T1
ZCCHC7	9.96036e-134	1.10432	0.371	0.189	3.64559e-129	T1
GLI3	1.31394e-133	1.0568	0.359	0.178	4.80917e-129	T1
FAF1	1.51937e-133	0.879432	0.321	0.143	5.56104e-129	T1
CDC42BPA	2.83045e-133	0.921311	0.353	0.169	1.03597e-128	T1
NME2	4.56526e-132	-0.804963	0.383	0.64	1.67093e-127	T1
SNHG32	4.8738e-132	-0.827496	0.188	0.475	1.78386e-127	T1
REV3L	6.88165e-132	0.958227	0.349	0.168	2.51875e-127	T1
SNHG6	1.81383e-131	-0.808754	0.365	0.634	6.63881e-127	T1
RERE	2.79998e-131	0.965166	0.466	0.273	1.02482e-126	T1
KANSL1	6.5211e-131	0.965456	0.506	0.316	2.38679e-126	T1
SNHG8	7.01168e-131	-0.829864	0.282	0.564	2.56634e-126	T1
PLAAT3	9.13466e-131	-0.78921	0.06	0.317	3.34338e-126	T1
IER2	1.74826e-130	-1.11309	0.406	0.647	6.39879e-126	T1
ACSS3	1.22756e-129	0.965484	0.293	0.126	4.49301e-125	T1
MBNL1	4.74279e-129	1.048	0.547	0.372	1.73591e-124	T1
PHIP	5.329e-129	0.931832	0.461	0.266	1.95047e-124	T1
RPS28	5.53517e-129	-0.509089	0.9	0.948	2.02593e-124	T1
ARHGAP21	1.21385e-128	0.990443	0.494	0.308	4.44282e-124	T1
FOSB	2.04141e-127	-1.29287	0.454	0.684	7.47176e-123	T1
PLA2R1	7.39868e-127	0.863168	0.316	0.142	2.70799e-122	T1
PTK2	1.80618e-126	0.911655	0.4	0.213	6.61079e-122	T1
SPATS2L	6.38361e-125	0.993102	0.429	0.248	2.33647e-120	T1
ZFAS1	6.79528e-125	-0.770841	0.394	0.648	2.48714e-120	T1
PAN3	7.21974e-125	0.965616	0.302	0.135	2.6425e-120	T1
EIF1	8.42199e-125	-0.602533	0.712	0.844	3.08253e-120	T1
NAV3	1.21904e-124	1.06191	0.513	0.319	4.46181e-120	T1
EBF1	9.58705e-124	1.29181	0.41	0.232	3.50896e-119	T1
ABCA8	4.08171e-123	1.04266	0.548	0.38	1.49395e-118	T1
MIPOL1	8.9205e-123	0.916806	0.252	0.102	3.26499e-118	T1
EEF1D	1.08661e-122	-0.688567	0.527	0.738	3.9771e-118	T1
COX7C	2.06243e-122	-0.695512	0.542	0.738	7.54871e-118	T1
RPL36AL	3.98076e-122	-0.72334	0.532	0.727	1.457e-117	T1
DIP2C	1.32376e-121	0.829033	0.291	0.127	4.84511e-117	T1
EHBP1	2.43788e-121	0.97635	0.514	0.331	8.92288e-117	T1
CLASP1	2.88229e-121	0.828216	0.3	0.135	1.05495e-116	T1
COL3A1	3.53102e-121	1.08003	0.673	0.485	1.29239e-116	T1
CROCC	1.15741e-120	0.840919	0.3	0.134	4.23623e-116	T1
HTRA1	1.7346e-119	-1.00979	0.23	0.494	6.3488e-115	T1
COL1A2	2.52e-119	0.873796	0.853	0.723	9.22345e-115	T1
MAML3	4.53387e-119	0.981146	0.355	0.177	1.65944e-114	T1
CSRP1	9.35672e-119	0.878905	0.489	0.309	3.42465e-114	T1
SERPING1	1.5185e-118	0.804017	0.715	0.582	5.55787e-114	T1
PFDN5	2.3055e-118	-0.656405	0.574	0.756	8.43837e-114	T1
FHL1	1.65623e-116	0.875756	0.293	0.135	6.06197e-112	T1
DYNC2H1	2.65945e-116	0.866552	0.379	0.2	9.73386e-112	T1
BAZ2B	3.85889e-116	0.878515	0.51	0.329	1.41239e-111	T1
ITGAV	4.07582e-116	1.00048	0.424	0.246	1.49179e-111	T1
MFGE8	4.10449e-116	0.91165	0.429	0.251	1.50228e-111	T1
OBSL1	1.40666e-115	-0.838073	0.125	0.384	5.1485e-111	T1
DLC1	2.62334e-114	1.13228	0.385	0.212	9.60168e-110	T1
NCOA1	3.10956e-114	0.941867	0.399	0.223	1.13813e-109	T1
CLASP2	5.60053e-114	0.886389	0.328	0.16	2.04985e-109	T1
PLXDC2	2.52933e-113	1.0319	0.417	0.241	9.25759e-109	T1
KDM6A	9.25514e-113	0.855738	0.3	0.139	3.38747e-108	T1
EPB41L2	3.25445e-112	0.935284	0.491	0.324	1.19116e-107	T1
COX4I1	8.34079e-112	-0.760245	0.308	0.556	3.05281e-107	T1
GAPDH	1.23792e-111	-0.73636	0.397	0.643	4.5309e-107	T1
H3F3A	2.10349e-111	-0.645829	0.53	0.723	7.699e-107	T1
LDHB	1.44403e-110	-0.740103	0.228	0.491	5.2853e-106	T1
TCEAL3	4.47025e-110	-0.82623	0.139	0.389	1.63615e-105	T1
SGK1	1.75096e-108	-0.837787	0.121	0.368	6.40869e-104	T1
PIK3R1	9.25879e-108	0.95638	0.436	0.262	3.38881e-103	T1
KLF2	4.30922e-107	-0.980892	0.235	0.48	1.57722e-102	T1
RALGPS2	6.01546e-107	0.864969	0.318	0.159	2.20172e-102	T1
PEBP1	6.85366e-107	-0.66832	0.392	0.632	2.50851e-102	T1
SERPINE2	1.10258e-106	-1.02599	0.168	0.412	4.03556e-102	T1
WT1	1.22622e-106	0.783689	0.274	0.123	4.4881e-102	T1
PTEN	3.21961e-106	0.95027	0.474	0.31	1.17841e-101	T1
EIF4A1	1.45363e-105	-0.736777	0.337	0.595	5.32043e-101	T1
CFI	1.76196e-105	0.75792	0.259	0.114	6.44894e-101	T1
FAM13A	7.03879e-105	0.912004	0.372	0.207	2.57627e-100	T1
CCDC18-AS1	2.83129e-104	0.85174	0.334	0.173	1.03628e-99	T1
IGF1R	6.50648e-104	0.842078	0.455	0.278	2.38144e-99	T1
MT-CO3	3.36917e-103	-0.651542	0.971	0.964	1.23315e-98	T1
METTL15	5.04085e-103	0.863356	0.253	0.112	1.845e-98	T1
CCNH	9.07868e-103	0.934878	0.371	0.208	3.32289e-98	T1
GAS1	1.69827e-102	1.01808	0.345	0.187	6.21585e-98	T1
FAM172A	1.97335e-102	0.950994	0.363	0.203	7.22265e-98	T1
CELF2	2.60258e-102	0.950432	0.57	0.419	9.52571e-98	T1
RPS21	2.87266e-102	-0.483345	0.871	0.92	1.05142e-97	T1
EIF4A2	7.25766e-102	-0.650136	0.432	0.671	2.65638e-97	T1
COL5A2	9.50771e-101	0.897018	0.368	0.205	3.47992e-96	T1
PNRC1	4.70633e-100	-0.675107	0.441	0.674	1.72256e-95	T1
TCF4	5.6888e-99	0.818123	0.626	0.487	2.08216e-94	T1
DANCR	4.66776e-98	-0.65309	0.12	0.353	1.70845e-93	T1
UQCRH	9.18951e-98	-0.679803	0.242	0.489	3.36345e-93	T1
TPM4	2.52024e-97	-0.726958	0.267	0.52	9.22432e-93	T1
CYB5A	6.33802e-97	-0.7438	0.194	0.437	2.31978e-92	T1
DENND4C	7.09875e-97	0.717784	0.278	0.132	2.59821e-92	T1
SFRP1	1.42361e-96	1.15473	0.427	0.279	5.21055e-92	T1
SLC7A2	3.05158e-96	-0.792058	0.069	0.279	1.11691e-91	T1
HS3ST1	3.71466e-96	-0.728462	0.087	0.308	1.3596e-91	T1
TENT5A	4.87315e-96	0.924419	0.377	0.216	1.78362e-91	T1
FTH1	1.09148e-95	-0.476091	0.823	0.888	3.99492e-91	T1
ANKRD17	1.52918e-95	0.842159	0.33	0.177	5.59695e-91	T1
MYLK	4.27763e-95	-1.21844	0.196	0.416	1.56566e-90	T1
MPDZ	2.39727e-94	0.859392	0.312	0.163	8.77426e-90	T1
KIAA1328	3.14548e-94	0.795681	0.27	0.128	1.15128e-89	T1
NBEA	3.65454e-94	0.831452	0.287	0.14	1.3376e-89	T1
MAP3K5	6.0281e-94	0.865199	0.456	0.291	2.20634e-89	T1
MON2	7.9885e-94	0.771627	0.341	0.184	2.92387e-89	T1
EXT1	1.51265e-93	0.973083	0.297	0.151	5.53646e-89	T1
SMARCA2	1.96502e-92	0.878561	0.518	0.371	7.19215e-88	T1
H2AFZ	2.86012e-92	-0.659966	0.186	0.425	1.04683e-87	T1
KLHDC8A	1.03646e-91	-0.663723	0.133	0.368	3.79355e-87	T1
PHF21A	2.4883e-91	0.816355	0.294	0.149	9.10742e-87	T1
HIBADH	9.739e-91	0.899497	0.273	0.136	3.56457e-86	T1
RALGAPA1	1.25359e-90	0.779767	0.391	0.231	4.58826e-86	T1
ING2	7.09784e-90	-0.633477	0.073	0.277	2.59788e-85	T1
TCEAL1	2.37683e-89	-0.716928	0.111	0.324	8.69943e-85	T1
PTBP2	3.13371e-89	0.723511	0.274	0.134	1.14697e-84	T1
NAP1L1	3.64537e-89	-0.623018	0.432	0.664	1.33424e-84	T1
SNHG7	4.7449e-89	-0.666865	0.223	0.459	1.73668e-84	T1
FN1	1.49059e-88	-0.837578	0.273	0.507	5.45569e-84	T1
NOP53	8.93308e-88	-0.614795	0.41	0.642	3.2696e-83	T1
COX6C	4.68729e-87	-0.584648	0.422	0.641	1.7156e-82	T1
MKLN1	5.59154e-87	0.787057	0.41	0.253	2.04656e-82	T1
PPP1R15A	2.06832e-86	-0.74511	0.125	0.334	7.57027e-82	T1
TXNIP	3.9942e-86	0.81021	0.659	0.563	1.46192e-81	T1
ZNF638	5.67592e-86	0.755312	0.468	0.314	2.07744e-81	T1
BICD1	7.78499e-86	-0.777325	0.099	0.308	2.84938e-81	T1
ABCA6	1.91207e-85	1.09285	0.422	0.279	6.99836e-81	T1
C20orf27	3.10471e-85	-0.611221	0.06	0.253	1.13635e-80	T1
TET2	8.47303e-85	0.735414	0.251	0.119	3.10121e-80	T1
SPATA6	1.05334e-84	0.745011	0.264	0.13	3.85534e-80	T1
HSPG2	1.81787e-84	0.715407	0.27	0.134	6.6536e-80	T1
ASPH	2.34361e-84	0.800472	0.4	0.254	8.57786e-80	T1
RICTOR	1.02616e-83	0.672511	0.269	0.132	3.75583e-79	T1
BCL2	1.53289e-83	0.844231	0.314	0.171	5.61054e-79	T1
FXYD1	2.66354e-83	0.780921	0.548	0.416	9.74883e-79	T1
KIF13A	3.54293e-83	0.715026	0.254	0.122	1.29675e-78	T1
CFH	3.94986e-83	-0.724026	0.358	0.585	1.44569e-78	T1
RIN2	9.97558e-82	0.774983	0.273	0.14	3.65116e-77	T1
ACTA2	2.05926e-81	-1.3157	0.262	0.461	7.53709e-77	T1
TRPS1	1.74686e-80	0.80909	0.263	0.131	6.39368e-76	T1
NSA2	2.25737e-80	-0.537054	0.341	0.585	8.2622e-76	T1
KRT19	2.72068e-80	-0.698361	0.122	0.325	9.95794e-76	T1
TKT	3.03669e-80	-0.566915	0.111	0.317	1.11146e-75	T1
KMT2C	4.02639e-80	0.709504	0.435	0.282	1.4737e-75	T1
FKBP5	5.01218e-80	-0.549829	0.096	0.298	1.83451e-75	T1
POU2F1	7.47552e-80	0.717604	0.262	0.131	2.73611e-75	T1
YBX1	5.40723e-79	-0.598738	0.336	0.559	1.9791e-74	T1
ARX	9.01051e-79	-0.587012	0.142	0.356	3.29794e-74	T1
EIF4B	1.05308e-78	-0.603209	0.368	0.6	3.85439e-74	T1
TCEAL9	2.23659e-78	-0.569787	0.273	0.509	8.18614e-74	T1
SOD1	6.2564e-78	-0.583011	0.376	0.589	2.28991e-73	T1
MTRNR2L8	1.25432e-77	-0.816452	0.25	0.464	4.59092e-73	T1
FBLN5	4.95096e-77	0.85507	0.317	0.181	1.8121e-72	T1
RHOB	2.11548e-76	-0.67557	0.269	0.484	7.74288e-72	T1
RWDD4	4.33344e-76	-0.553869	0.08	0.266	1.58608e-71	T1
MCL1	6.66019e-76	-0.833579	0.171	0.374	2.4377e-71	T1
ZNF704	1.3896e-75	0.847837	0.432	0.297	5.08608e-71	T1
EIF3L	1.48065e-75	-0.559071	0.218	0.442	5.41934e-71	T1
CFL1	1.5802e-75	-0.618876	0.244	0.46	5.78367e-71	T1
UBXN1	5.53395e-75	-0.5178	0.153	0.363	2.02548e-70	T1
DOCK4	1.31763e-74	0.875541	0.258	0.131	4.82266e-70	T1
ADAMTS1	1.65075e-74	-0.74337	0.271	0.486	6.04191e-70	T1
SLC44A1	3.58216e-74	0.682042	0.253	0.129	1.3111e-69	T1
HSP90AA1	4.72919e-74	-0.584219	0.531	0.707	1.73093e-69	T1
NDUFA4	8.92229e-74	-0.56025	0.398	0.593	3.26565e-69	T1
CD55	1.56081e-73	-0.631604	0.129	0.328	5.71273e-69	T1
PPIA	1.96541e-73	-0.576018	0.4	0.607	7.19361e-69	T1
APEX1	2.99216e-73	-0.534581	0.117	0.313	1.09516e-68	T1
MNAT1	3.39354e-73	0.76537	0.286	0.159	1.24207e-68	T1
EIF3E	4.08857e-73	-0.531877	0.445	0.645	1.49646e-68	T1
ADD3	4.25224e-73	0.709863	0.434	0.295	1.55636e-68	T1
DCAF6	4.59114e-73	0.753499	0.293	0.164	1.6804e-68	T1
AHI1	7.09722e-73	0.776654	0.387	0.249	2.59765e-68	T1
IMPDH2	8.74527e-73	-0.545342	0.193	0.408	3.20086e-68	T1
ERC1	1.14502e-72	0.730334	0.273	0.145	4.1909e-68	T1
MEF2C	4.28112e-72	-0.535354	0.128	0.329	1.56693e-67	T1
RTRAF	8.13977e-72	-0.486499	0.153	0.363	2.97924e-67	T1
MYL6	9.13238e-72	-0.638854	0.522	0.685	3.34254e-67	T1
EIF3F	1.58524e-71	-0.549733	0.286	0.508	5.80214e-67	T1
ACSM3	2.66752e-71	-0.724783	0.209	0.423	9.76338e-67	T1
ITM2B	4.69521e-71	-0.392501	0.759	0.851	1.71849e-66	T1
HIBCH	5.27996e-71	0.766124	0.268	0.146	1.93252e-66	T1
TNXB	5.39041e-71	0.697984	0.52	0.37	1.97294e-66	T1
BIRC6	6.60597e-71	0.721931	0.374	0.235	2.41785e-66	T1
FNDC3B	9.37646e-71	0.719633	0.5	0.368	3.43188e-66	T1
PTMS	7.70079e-70	-0.526864	0.429	0.628	2.81857e-65	T1
RPS10	7.82989e-70	-0.673029	0.443	0.617	2.86582e-65	T1
TNKS	8.22586e-70	0.753507	0.29	0.163	3.01075e-65	T1
SOCS3	3.15147e-69	-0.856976	0.088	0.258	1.15347e-64	T1
PTGIS	3.64116e-69	0.746252	0.338	0.206	1.3327e-64	T1
SYNE2	5.35504e-69	-0.703456	0.239	0.448	1.96e-64	T1
FILIP1L	2.16513e-68	-0.619657	0.191	0.393	7.92458e-64	T1
PTPRD	9.83283e-68	0.916519	0.271	0.148	3.59892e-63	T1
KANK2	2.4826e-67	-0.548986	0.197	0.402	9.08656e-63	T1
LRP1	3.86573e-67	0.592975	0.641	0.538	1.4149e-62	T1
COMMD6	5.85603e-67	-0.512245	0.456	0.642	2.14336e-62	T1
HERC4	6.15676e-67	0.696799	0.293	0.166	2.25343e-62	T1
MAP4K3	1.83004e-66	0.746642	0.292	0.168	6.69814e-62	T1
SIK3	3.84467e-66	0.734494	0.268	0.146	1.40719e-61	T1
MAOB	3.90251e-66	-0.529092	0.105	0.287	1.42836e-61	T1
CEBPB	4.55004e-66	-0.590245	0.186	0.384	1.66536e-61	T1
FNBP1	5.35366e-66	0.717717	0.278	0.158	1.95949e-61	T1
CNN2	1.87502e-65	-0.567395	0.083	0.252	6.86278e-61	T1
ROBO1	1.91409e-65	0.613551	0.257	0.134	7.00576e-61	T1
CALD1	2.80288e-65	-0.474766	0.742	0.834	1.02588e-60	T1
ATP5PO	3.26141e-65	-0.453851	0.191	0.397	1.19371e-60	T1
PHB2	6.29657e-65	-0.428025	0.163	0.362	2.30461e-60	T1
SARAF	1.02268e-64	-0.516942	0.327	0.539	3.74312e-60	T1
ATP5F1E	7.27409e-64	-0.465222	0.443	0.648	2.66239e-59	T1
GYPC	1.3222e-63	-0.452707	0.142	0.33	4.8394e-59	T1
DDX17	2.52128e-63	0.416815	0.73	0.633	9.22815e-59	T1
PARK7	2.53691e-63	-0.516246	0.261	0.464	9.28534e-59	T1
SAT2	3.18469e-63	-0.506305	0.209	0.412	1.16563e-58	T1
DDX5	3.73745e-63	-0.589069	0.498	0.68	1.36794e-58	T1
SULF2	4.05186e-63	-0.592526	0.117	0.294	1.48302e-58	T1
IGF1	6.03801e-63	0.789393	0.411	0.281	2.20997e-58	T1
LRRC17	8.03664e-63	-0.593925	0.144	0.328	2.94149e-58	T1
CITED2	9.64956e-63	-0.552498	0.269	0.472	3.53184e-58	T1
MT-CO1	1.03473e-62	-0.368851	0.977	0.967	3.78721e-58	T1
LGALS1	1.07387e-62	-0.417903	0.665	0.783	3.93047e-58	T1
MT-ND3	2.27527e-62	-0.58565	0.985	0.97	8.32772e-58	T1
TOMM20	2.77473e-62	-0.452051	0.278	0.488	1.01558e-57	T1
UFC1	3.85738e-62	-0.41762	0.124	0.307	1.41184e-57	T1
CPQ	3.92049e-62	0.695505	0.515	0.411	1.43494e-57	T1
MYH11	4.17969e-62	-1.14546	0.1	0.26	1.52981e-57	T1
AR	9.8859e-62	0.69806	0.353	0.229	3.61834e-57	T1
NR2F2	1.12813e-61	-0.485319	0.594	0.764	4.12908e-57	T1
ITSN1	1.2145e-61	0.78847	0.253	0.14	4.4452e-57	T1
SLC25A3	2.87493e-61	-0.450948	0.311	0.521	1.05225e-56	T1
MAP4K4	4.11571e-61	0.71587	0.302	0.182	1.50639e-56	T1
NUMB	5.16688e-61	0.656856	0.276	0.158	1.89113e-56	T1
KLF7	1.08932e-60	0.66668	0.253	0.138	3.98703e-56	T1
EIF3H	1.12599e-60	-0.462523	0.283	0.491	4.12124e-56	T1
NF1	1.29219e-60	0.717652	0.319	0.195	4.72954e-56	T1
EIF3D	1.42331e-60	-0.456013	0.133	0.314	5.20944e-56	T1
RAB13	2.15661e-60	-0.431696	0.104	0.274	7.8934e-56	T1
HSPA8	2.7256e-60	-0.524729	0.24	0.435	9.97596e-56	T1
TOMM7	3.36203e-60	-0.445883	0.596	0.727	1.23054e-55	T1
EIF3G	5.02385e-60	-0.461405	0.23	0.431	1.83878e-55	T1
DPYSL3	1.12599e-59	-0.51076	0.189	0.385	4.12124e-55	T1
DYM	3.95195e-59	0.652002	0.252	0.141	1.44645e-54	T1
GULP1	7.90513e-59	0.787265	0.285	0.17	2.89336e-54	T1
UXT	9.14326e-59	-0.414354	0.192	0.389	3.34653e-54	T1
MORF4L2	1.09827e-58	-0.536548	0.379	0.572	4.01978e-54	T1
ATP5MG	1.13421e-58	-0.427716	0.381	0.581	4.15132e-54	T1
BNIP3L	1.31114e-58	-0.475993	0.273	0.477	4.79891e-54	T1
SET	1.35947e-58	-0.465019	0.301	0.506	4.97581e-54	T1
MT-CYB	3.26386e-58	-0.41879	0.975	0.962	1.1946e-53	T1
N4BP2L2	3.71864e-58	0.478742	0.686	0.612	1.36106e-53	T1
SPARCL1	3.88641e-58	0.588144	0.647	0.546	1.42247e-53	T1
EPB41L4A-AS1	4.32577e-58	-0.432358	0.239	0.436	1.58328e-53	T1
ARHGAP6	6.1986e-58	0.907762	0.302	0.191	2.26875e-53	T1
HSPD1	6.47999e-58	-0.519365	0.239	0.432	2.37174e-53	T1
RASSF8	1.39727e-57	0.718174	0.283	0.168	5.11414e-53	T1
HINT1	2.224e-57	-0.470542	0.306	0.5	8.14008e-53	T1
DNAJB1	2.22438e-57	-0.696622	0.161	0.331	8.14146e-53	T1
BMPR1A	3.04089e-57	0.661977	0.264	0.151	1.113e-52	T1
TTC17	3.53935e-57	0.736901	0.345	0.227	1.29544e-52	T1
ARPC2	3.70591e-57	-0.4507	0.192	0.38	1.3564e-52	T1
KIFAP3	3.7627e-57	0.643931	0.265	0.155	1.37718e-52	T1
BRAF	3.89669e-57	0.669823	0.272	0.157	1.42623e-52	T1
BEX3	1.08979e-56	-0.44688	0.374	0.574	3.98873e-52	T1
TSHZ2	2.18599e-56	0.775657	0.523	0.428	8.00094e-52	T1
ATP5MC2	7.83059e-56	-0.45787	0.404	0.582	2.86607e-51	T1
EIF3K	8.01339e-56	-0.45775	0.26	0.454	2.93298e-51	T1
LRRFIP2	1.16629e-55	0.7123	0.285	0.174	4.26875e-51	T1
SETD5	1.63838e-55	0.639114	0.332	0.214	5.99664e-51	T1
HIGD2A	2.01642e-55	-0.401699	0.104	0.266	7.38032e-51	T1
DUSP1	4.79775e-55	-0.573739	0.345	0.524	1.75602e-50	T1
NFKBIA	8.6867e-55	-0.503816	0.242	0.428	3.17942e-50	T1
NEK7	5.16016e-54	0.703625	0.29	0.179	1.88867e-49	T1
RAN	6.07552e-54	-0.426011	0.163	0.341	2.2237e-49	T1
RWDD1	9.1047e-54	-0.432888	0.156	0.332	3.33241e-49	T1
VDAC2	1.01418e-53	-0.386877	0.168	0.347	3.712e-49	T1
PPP2CB	1.14184e-53	-0.478789	0.193	0.377	4.17924e-49	T1
SEMA3C	3.61006e-53	0.779859	0.255	0.146	1.32132e-48	T1
MRFAP1	4.01055e-53	-0.401919	0.233	0.425	1.4679e-48	T1
CCT3	7.04774e-53	-0.387433	0.128	0.296	2.57954e-48	T1
ALDH7A1	8.20395e-53	-0.563736	0.184	0.36	3.00273e-48	T1
PEG10	8.62479e-53	-0.575017	0.257	0.439	3.15676e-48	T1
COL12A1	1.12312e-52	-0.502677	0.304	0.5	4.11073e-48	T1
SNHG5	1.24257e-52	-0.437656	0.388	0.584	4.54794e-48	T1
ARID1B	1.86248e-52	0.590288	0.527	0.419	6.81687e-48	T1
MIF	3.59272e-52	-0.431238	0.389	0.577	1.31497e-47	T1
CACHD1	5.59007e-52	0.640289	0.275	0.164	2.04602e-47	T1
GALNT10	7.55328e-52	-0.557481	0.11	0.264	2.76458e-47	T1
CLSTN2	1.31696e-51	-0.637941	0.104	0.253	4.8202e-47	T1
EIF3M	1.52158e-51	-0.433642	0.205	0.387	5.56913e-47	T1
TENT2	1.77836e-51	0.625251	0.263	0.155	6.50898e-47	T1
MT-ND1	2.65549e-51	-0.466492	0.91	0.92	9.71935e-47	T1
MAML2	3.8414e-51	0.896585	0.339	0.236	1.40599e-46	T1
FTL	3.84287e-51	-0.348069	0.803	0.863	1.40653e-46	T1
TXN	3.96932e-51	-0.405757	0.217	0.4	1.45281e-46	T1
HSPB1	4.91715e-51	-0.500814	0.357	0.542	1.79973e-46	T1
CTNNAL1	5.5424e-51	-0.452559	0.155	0.324	2.02857e-46	T1
HERPUD1	6.20651e-51	-0.512616	0.196	0.371	2.27165e-46	T1
ZNF431	9.95228e-51	-0.542404	0.107	0.258	3.64263e-46	T1
NDUFS5	1.03387e-50	-0.436728	0.314	0.501	3.78407e-46	T1
PDS5B	1.11506e-50	0.709429	0.344	0.233	4.08122e-46	T1
GAS6	1.76448e-50	0.654823	0.433	0.328	6.45816e-46	T1
BMPR2	2.8006e-50	0.628536	0.289	0.18	1.02505e-45	T1
RBIS	2.96317e-50	-0.387384	0.224	0.41	1.08455e-45	T1
SSR2	7.14819e-50	-0.388269	0.309	0.503	2.61631e-45	T1
EDF1	9.45575e-50	-0.406769	0.37	0.563	3.4609e-45	T1
WDFY3	9.67745e-50	0.578704	0.259	0.152	3.54204e-45	T1
SYTL4	1.98392e-49	-0.518013	0.172	0.339	7.26133e-45	T1
ATF7IP	2.52356e-49	0.598807	0.322	0.211	9.23648e-45	T1
PHF3	2.80307e-49	0.630419	0.47	0.373	1.02595e-44	T1
ADGRL2	3.52796e-49	0.64046	0.299	0.19	1.29127e-44	T1
SERPINB6	4.46696e-49	-0.456799	0.181	0.35	1.63495e-44	T1
ITGB1	9.86413e-49	-0.488964	0.432	0.603	3.61037e-44	T1
ISLR	1.1388e-48	0.62251	0.361	0.248	4.16813e-44	T1
UBC	1.32294e-48	-0.378106	0.617	0.746	4.8421e-44	T1
ENO1	2.3243e-48	-0.385124	0.134	0.293	8.50716e-44	T1
ZFAND3	2.92982e-48	0.630746	0.274	0.17	1.07234e-43	T1
CCDC85B	3.76824e-48	-0.348494	0.161	0.33	1.37921e-43	T1
RPL22L1	5.35577e-48	-0.37299	0.141	0.302	1.96027e-43	T1
EPS8	8.36744e-48	-0.411117	0.218	0.4	3.06257e-43	T1
NUDT4	1.38049e-47	-0.477474	0.133	0.286	5.05274e-43	T1
TNRC6B	1.81233e-47	0.578563	0.506	0.411	6.6333e-43	T1
NBEAL1	2.16999e-47	0.651683	0.289	0.185	7.9424e-43	T1
QSOX1	5.77439e-47	-0.532219	0.15	0.306	2.11348e-42	T1
GLRX5	7.10259e-47	-0.354007	0.109	0.258	2.59962e-42	T1
MYL12A	1.23433e-46	-0.452161	0.26	0.434	4.51779e-42	T1
CLEC2B	1.2368e-46	-0.331443	0.126	0.281	4.52683e-42	T1
PDK4	1.7269e-46	-0.483552	0.236	0.405	6.32061e-42	T1
PRDX2	1.75391e-46	-0.396113	0.273	0.452	6.41949e-42	T1
ATP5F1A	2.46271e-46	-0.338624	0.156	0.321	9.01378e-42	T1
SRP14	3.71122e-46	-0.327406	0.623	0.752	1.35834e-41	T1
SRSF3	3.93697e-46	-0.438019	0.354	0.536	1.44097e-41	T1
ZFAND5	4.84986e-46	-0.546154	0.238	0.412	1.7751e-41	T1
HSPE1	4.90386e-46	-0.428804	0.216	0.387	1.79486e-41	T1
ADAMTS5	6.04614e-46	-0.670244	0.215	0.372	2.21295e-41	T1
ANP32B	9.35518e-46	-0.372469	0.208	0.383	3.42409e-41	T1
PPP1R12B	1.06151e-45	0.657828	0.444	0.339	3.88522e-41	T1
NEAT1	1.09389e-45	-0.959491	0.508	0.645	4.00374e-41	T1
MATN2	1.16207e-45	0.676787	0.405	0.3	4.2533e-41	T1
PIAS1	1.74173e-45	0.606325	0.351	0.245	6.37492e-41	T1
MT-ATP6	2.74626e-45	-0.47566	0.982	0.969	1.00516e-40	T1
FBL	4.22178e-45	-0.358896	0.12	0.269	1.54521e-40	T1
GPX4	4.41348e-45	-0.378278	0.268	0.447	1.61538e-40	T1
SNRPF	4.52874e-45	-0.329717	0.171	0.336	1.65756e-40	T1
NDUFB4	6.58841e-45	-0.370004	0.267	0.447	2.41142e-40	T1
SPIDR	1.73272e-44	0.680057	0.266	0.166	6.34193e-40	T1
CHCHD2	1.89792e-44	-0.358418	0.398	0.571	6.94659e-40	T1
RBMS1	2.21473e-44	0.63772	0.412	0.311	8.10615e-40	T1
EIF3I	2.69272e-44	-0.317088	0.133	0.285	9.85563e-40	T1
PCNX1	3.56014e-44	0.565312	0.286	0.182	1.30305e-39	T1
SMS	4.79537e-44	-0.281911	0.17	0.337	1.75515e-39	T1
DDT	4.8723e-44	-0.337431	0.155	0.314	1.78331e-39	T1
COL1A1	4.90107e-44	1.11243	0.739	0.673	1.79384e-39	T1
ENAH	5.02917e-44	-0.33962	0.13	0.28	1.84073e-39	T1
TRPM7	7.2566e-44	0.551679	0.25	0.152	2.65599e-39	T1
LUM	1.36449e-43	0.736134	0.508	0.392	4.99416e-39	T1
FBN1	2.06269e-43	0.59718	0.464	0.367	7.54966e-39	T1
ECHDC2	2.59791e-43	0.576322	0.441	0.346	9.50862e-39	T1
FAM210B	3.31756e-43	-0.412357	0.14	0.288	1.21426e-38	T1
UBR5	3.94002e-43	0.584865	0.325	0.221	1.44209e-38	T1
SNRPD2	6.25626e-43	-0.389581	0.307	0.484	2.28986e-38	T1
PCSK5	6.88902e-43	0.626855	0.277	0.175	2.52145e-38	T1
COPS9	8.14006e-43	-0.353763	0.182	0.345	2.97934e-38	T1
BTG1	1.33606e-42	-0.356901	0.384	0.566	4.89013e-38	T1
AFDN	1.89523e-42	0.573227	0.252	0.156	6.93672e-38	T1
CCT8	2.46798e-42	-0.293644	0.146	0.3	9.03304e-38	T1
ATP6V1G1	3.15486e-42	-0.320229	0.28	0.46	1.15471e-37	T1
CLTB	4.67699e-42	-0.298847	0.138	0.288	1.71182e-37	T1
GNAQ	4.86217e-42	0.647698	0.386	0.289	1.7796e-37	T1
SEC11A	5.14144e-42	-0.313087	0.251	0.429	1.88182e-37	T1
SBDS	6.77033e-42	-0.294057	0.128	0.275	2.47801e-37	T1
POLR1D	1.29517e-41	-0.315677	0.191	0.353	4.74043e-37	T1
LDHA	1.33628e-41	-0.353054	0.126	0.268	4.89091e-37	T1
TSPAN3	1.53515e-41	-0.379999	0.132	0.278	5.61882e-37	T1
CLU	1.86776e-41	0.606062	0.525	0.451	6.8362e-37	T1
RNASEK	1.94346e-41	-0.341467	0.304	0.48	7.11325e-37	T1
SYF2	2.62785e-41	-0.303368	0.271	0.449	9.6182e-37	T1
COX7A2L	3.00196e-41	-0.301851	0.231	0.408	1.09875e-36	T1
PSMA7	6.63755e-41	-0.369863	0.257	0.424	2.42941e-36	T1
ISCU	7.38117e-41	-0.297946	0.179	0.337	2.70158e-36	T1
CST3	8.70923e-41	0.526754	0.681	0.635	3.18767e-36	T1
SNHG16	9.27527e-41	-0.332837	0.128	0.271	3.39484e-36	T1
HERC1	1.29202e-40	0.534129	0.282	0.183	4.72893e-36	T1
OGA	1.48513e-40	0.530976	0.387	0.283	5.43574e-36	T1
DICER1	1.57435e-40	0.563574	0.304	0.205	5.76228e-36	T1
PRDX4	1.78784e-40	-0.284621	0.139	0.286	6.54369e-36	T1
CSRNP3	1.95919e-40	0.584202	0.255	0.16	7.17084e-36	T1
IGBP1	2.02671e-40	-0.308621	0.152	0.303	7.41796e-36	T1
NBL1	2.27475e-40	-0.400508	0.327	0.501	8.32581e-36	T1
ERP29	2.70169e-40	-0.297954	0.16	0.314	9.88846e-36	T1
C19orf53	3.92829e-40	-0.300048	0.23	0.397	1.43779e-35	T1
GPATCH8	4.33846e-40	0.609436	0.326	0.229	1.58792e-35	T1
NUPR1	4.78096e-40	-0.340383	0.415	0.592	1.74988e-35	T1
TIMP2	1.09399e-39	-0.3839	0.601	0.752	4.0041e-35	T1
SNRPE	1.57091e-39	-0.322233	0.194	0.355	5.7497e-35	T1
SMCHD1	2.62267e-39	0.578546	0.337	0.243	9.59924e-35	T1
SENP6	2.68241e-39	0.590838	0.406	0.316	9.81788e-35	T1
TGFB1I1	2.94782e-39	-0.374948	0.122	0.259	1.07893e-34	T1
DYRK1A	5.79175e-39	0.519285	0.276	0.179	2.11984e-34	T1
PLPP3	8.35099e-39	0.585113	0.444	0.356	3.05655e-34	T1
AHNAK	9.24725e-39	0.423072	0.629	0.564	3.38459e-34	T1
COX5B	1.09159e-38	-0.363893	0.305	0.473	3.99532e-34	T1
OPTN	1.10827e-38	-0.350309	0.145	0.287	4.05637e-34	T1
RCN1	1.59052e-38	-0.333086	0.14	0.28	5.82146e-34	T1
ATP1A1	1.75877e-38	-0.401692	0.153	0.295	6.43727e-34	T1
SCFD1	2.34539e-38	0.655033	0.257	0.169	8.58436e-34	T1
EID1	2.41415e-38	-0.351084	0.416	0.58	8.83605e-34	T1
SF3B5	2.9427e-38	-0.274963	0.161	0.31	1.07706e-33	T1
BANF1	5.4545e-38	-0.288223	0.198	0.358	1.9964e-33	T1
PRDX5	6.09095e-38	-0.329816	0.266	0.43	2.22935e-33	T1
ZRANB2	9.52585e-38	0.4943	0.441	0.352	3.48656e-33	T1
VPS13C	1.06737e-37	0.514496	0.365	0.269	3.90668e-33	T1
RSL1D1	1.09544e-37	-0.292802	0.241	0.409	4.00943e-33	T1
SNX3	2.50333e-37	-0.324521	0.273	0.441	9.16246e-33	T1
HSBP1	2.99452e-37	-0.275297	0.226	0.388	1.09603e-32	T1
LMNA	3.01371e-37	-0.372301	0.269	0.435	1.10305e-32	T1
CHD9	3.78812e-37	0.53596	0.466	0.386	1.38649e-32	T1
LTBP3	6.14507e-37	0.553637	0.391	0.3	2.24916e-32	T1
TUBB	7.05116e-37	-0.366615	0.44	0.598	2.5808e-32	T1
SUMO2	1.01285e-36	-0.305057	0.462	0.622	3.70715e-32	T1
UBL5	1.36146e-36	-0.309265	0.326	0.498	4.98308e-32	T1
GNG5	1.42191e-36	-0.277095	0.198	0.355	5.20432e-32	T1
CAMLG	1.93922e-36	-0.280577	0.189	0.343	7.09772e-32	T1
TALDO1	1.99601e-36	-0.265652	0.121	0.253	7.30559e-32	T1
PPP6R3	2.60518e-36	0.509266	0.335	0.24	9.53523e-32	T1
RNF19A	3.41998e-36	0.55907	0.325	0.236	1.25175e-31	T1
USP47	4.21565e-36	0.556189	0.302	0.21	1.54297e-31	T1
SMIM26	4.43989e-36	-0.258125	0.22	0.38	1.62504e-31	T1
PFN1	4.75914e-36	-0.370815	0.231	0.384	1.74189e-31	T1
SELENOK	5.00158e-36	-0.2759	0.158	0.301	1.83063e-31	T1
MSI2	7.68698e-36	-0.426154	0.222	0.371	2.81351e-31	T1
YWHAB	9.44861e-36	-0.318044	0.216	0.371	3.45828e-31	T1
MYL12B	1.1541e-35	-0.324543	0.361	0.52	4.22411e-31	T1
VAPA	1.2523e-35	-0.340282	0.309	0.478	4.58355e-31	T1
MRPS24	1.75503e-35	-0.262375	0.158	0.299	6.4236e-31	T1
RBM26	2.22835e-35	0.536482	0.327	0.236	8.15599e-31	T1
MYCBP2	2.55888e-35	0.55291	0.408	0.322	9.36575e-31	T1
KLF4	2.79395e-35	-0.455206	0.172	0.31	1.02261e-30	T1
LAMTOR5	3.50328e-35	-0.259027	0.19	0.342	1.28223e-30	T1
PRDX6	4.29929e-35	-0.315076	0.241	0.398	1.57358e-30	T1
EPS15	7.06846e-35	0.527463	0.284	0.195	2.58713e-30	T1
KLF6	8.12424e-35	-0.502823	0.198	0.336	2.97355e-30	T1
WDR33	8.86532e-35	0.517092	0.281	0.194	3.24479e-30	T1
CYBRD1	1.78056e-34	0.535339	0.397	0.313	6.51703e-30	T1
PUM2	1.81964e-34	0.493981	0.33	0.239	6.66007e-30	T1
TMEM18	1.88601e-34	-0.262195	0.127	0.257	6.90299e-30	T1
SSB	2.42639e-34	-0.312423	0.208	0.36	8.88082e-30	T1
ATP6AP2	2.8861e-34	-0.305146	0.174	0.316	1.05634e-29	T1
CNTLN	3.82043e-34	0.598363	0.26	0.175	1.39832e-29	T1
CCT7	3.99503e-34	-0.268164	0.131	0.264	1.46222e-29	T1
TCP1	4.86363e-34	-0.313962	0.144	0.275	1.78014e-29	T1
SCD5	5.40058e-34	-0.315055	0.144	0.276	1.97666e-29	T1
RBM3	6.26603e-34	-0.309928	0.161	0.298	2.29343e-29	T1
RBBP7	9.1083e-34	-0.259108	0.155	0.292	3.33373e-29	T1
TMEM230	9.62502e-34	-0.250011	0.156	0.294	3.52285e-29	T1
PLEKHA5	1.1034e-33	0.698733	0.397	0.322	4.03855e-29	T1
ARPC3	1.17424e-33	-0.270922	0.189	0.334	4.29785e-29	T1
TNRC6A	2.22619e-33	0.508301	0.423	0.34	8.14807e-29	T1
SNHG25	2.26364e-33	0.51676	0.274	0.184	8.28514e-29	T1
CLIC1	4.56571e-33	-0.269457	0.183	0.324	1.67109e-28	T1
FMNL2	4.97392e-33	0.619995	0.291	0.206	1.8205e-28	T1
ATP5PF	5.89912e-33	-0.260979	0.291	0.456	2.15914e-28	T1
RUFY3	9.0235e-33	0.490789	0.384	0.294	3.30269e-28	T1
HNRNPDL	1.0374e-32	-0.3477	0.515	0.662	3.797e-28	T1
ANKHD1	1.10386e-32	0.517524	0.313	0.227	4.04023e-28	T1
ADIRF	1.90981e-32	0.44206	0.574	0.482	6.99009e-28	T1
MCC	2.04168e-32	-0.412535	0.235	0.382	7.47275e-28	T1
RBM8A	2.78286e-32	-0.25175	0.156	0.29	1.01856e-27	T1
FLNA	3.14779e-32	-0.542817	0.303	0.442	1.15212e-27	T1
BBX	3.16893e-32	0.571299	0.404	0.327	1.15986e-27	T1
LCOR	3.38102e-32	0.501735	0.265	0.178	1.23749e-27	T1
POGZ	3.42172e-32	0.485108	0.367	0.279	1.25238e-27	T1
CCT4	3.92339e-32	-0.279754	0.201	0.346	1.436e-27	T1
SSBP3	4.13422e-32	-0.330972	0.227	0.376	1.51317e-27	T1
PODN	4.64388e-32	0.576526	0.329	0.243	1.69971e-27	T1
MICOS10	5.62686e-32	-0.253754	0.201	0.345	2.05949e-27	T1
NCAM1	5.98368e-32	0.497344	0.299	0.21	2.19009e-27	T1
CNBP	6.95631e-32	-0.338095	0.363	0.523	2.54608e-27	T1
NCL	7.13418e-32	-0.317937	0.334	0.492	2.61118e-27	T1
SMDT1	1.06053e-31	-0.298042	0.245	0.393	3.88164e-27	T1
KIAA1109	1.12012e-31	0.476643	0.378	0.291	4.09975e-27	T1
AKAP13	1.17302e-31	0.550406	0.363	0.282	4.29336e-27	T1
OST4	1.36789e-31	-0.312839	0.4	0.55	5.0066e-27	T1
AP2M1	1.55281e-31	-0.300054	0.161	0.294	5.68345e-27	T1
COX6B1	1.87336e-31	-0.277151	0.314	0.474	6.85667e-27	T1
NIPBL	2.55241e-31	0.536411	0.373	0.289	9.34208e-27	T1
HNRNPA0	2.58495e-31	-0.268268	0.226	0.376	9.46119e-27	T1
CLTA	4.08726e-31	-0.259863	0.275	0.432	1.49598e-26	T1
PUM3	4.26357e-31	0.616805	0.276	0.198	1.56051e-26	T1
TRIR	4.92739e-31	-0.273413	0.233	0.382	1.80347e-26	T1
KDELR1	5.987e-31	-0.282838	0.271	0.428	2.1913e-26	T1
BRWD1	6.77667e-31	0.510061	0.276	0.193	2.48033e-26	T1
LINC01578	8.06799e-31	-0.250222	0.25	0.407	2.95297e-26	T1
VPS28	9.27755e-31	-0.262794	0.258	0.412	3.39568e-26	T1
GLS	2.63806e-30	0.526176	0.272	0.191	9.65556e-26	T1
FNIP1	2.88676e-30	0.534643	0.292	0.211	1.05658e-25	T1
SNHG9	2.93889e-30	-0.34785	0.155	0.277	1.07566e-25	T1
CPSF6	3.01638e-30	0.510164	0.263	0.182	1.10403e-25	T1
CREBBP	3.30473e-30	0.461001	0.305	0.22	1.20956e-25	T1
PDIA6	5.64042e-30	-0.262175	0.216	0.358	2.06445e-25	T1
HNRNPU	5.87545e-30	-0.528481	0.411	0.555	2.15047e-25	T1
ATP5IF1	5.99558e-30	-0.280144	0.277	0.43	2.19444e-25	T1
LMO4	6.64315e-30	0.545087	0.301	0.223	2.43146e-25	T1
TSC22D1	9.23613e-30	-0.316162	0.329	0.482	3.38052e-25	T1
LAMA2	9.50599e-30	0.730646	0.39	0.314	3.47929e-25	T1
ANXA1	9.51648e-30	0.84534	0.38	0.313	3.48313e-25	T1
SKP1	1.11328e-29	-0.288331	0.501	0.645	4.07473e-25	T1
TBL1XR1	1.23704e-29	0.526574	0.387	0.313	4.5277e-25	T1
S100A10	1.28424e-29	-0.384109	0.487	0.619	4.70046e-25	T1
CAV1	1.30618e-29	-0.441731	0.306	0.442	4.78074e-25	T1
BRK1	1.4153e-29	-0.262255	0.199	0.338	5.18013e-25	T1
NONO	1.50534e-29	-0.267358	0.163	0.291	5.50968e-25	T1
GSTM5	2.49133e-29	-0.276402	0.156	0.278	9.11852e-25	T1
VLDLR	2.51994e-29	0.478303	0.315	0.23	9.22322e-25	T1
SOS1	2.80776e-29	0.5212	0.31	0.228	1.02767e-24	T1
ATXN2	3.48775e-29	0.487151	0.285	0.204	1.27655e-24	T1
COL18A1	5.31273e-29	-0.369548	0.22	0.352	1.94451e-24	T1
PPIB	7.14949e-29	-0.257207	0.405	0.555	2.61678e-24	T1
TUT4	8.51023e-29	0.413039	0.436	0.359	3.11483e-24	T1
RARRES2	9.52039e-29	0.386913	0.724	0.695	3.48456e-24	T1
GTF2I	1.40436e-28	-0.32646	0.325	0.479	5.1401e-24	T1
HMGB2	1.40949e-28	-0.280734	0.171	0.297	5.15888e-24	T1
RAC1	2.24451e-28	-0.275929	0.353	0.509	8.21515e-24	T1
KLF9	2.94755e-28	-0.424325	0.168	0.285	1.07883e-23	T1
SELENOP	4.00437e-28	0.39479	0.729	0.715	1.46564e-23	T1
IL6ST	4.47863e-28	0.425823	0.449	0.377	1.63922e-23	T1
MAST4	5.38379e-28	0.545277	0.3	0.22	1.97052e-23	T1
SCN7A	5.43535e-28	0.684169	0.443	0.384	1.98939e-23	T1
AFF1	9.55687e-28	0.477217	0.326	0.242	3.49791e-23	T1
LPP	1.36891e-27	0.401347	0.515	0.448	5.01034e-23	T1
PTPN13	1.68612e-27	0.488236	0.25	0.172	6.17136e-23	T1
PKN2	4.06178e-27	0.460291	0.402	0.332	1.48665e-22	T1
AKAP12	4.69341e-27	0.438256	0.496	0.43	1.71784e-22	T1
ATP5MD	5.60259e-27	-0.263835	0.284	0.428	2.0506e-22	T1
SLMAP	8.68638e-27	0.501886	0.25	0.173	3.1793e-22	T1
ITPR1	1.80798e-26	-0.411229	0.205	0.325	6.61738e-22	T1
GLG1	2.13368e-26	0.437656	0.451	0.382	7.80949e-22	T1
ZNF148	2.39477e-26	0.498148	0.337	0.263	8.7651e-22	T1
LAMB2	2.45384e-26	0.489395	0.397	0.322	8.98128e-22	T1
ATF4	3.08846e-26	-0.250143	0.17	0.293	1.13041e-21	T1
XAF1	3.464e-26	-0.350443	0.167	0.281	1.26786e-21	T1
HMGN2	3.53126e-26	-0.286999	0.471	0.615	1.29248e-21	T1
CCNL1	3.57616e-26	-0.696821	0.341	0.465	1.30891e-21	T1
SMARCA1	6.09142e-26	-0.31192	0.166	0.284	2.22952e-21	T1
PPM1K	6.57228e-26	-0.336745	0.22	0.346	2.40552e-21	T1
RBM6	6.69512e-26	0.514735	0.294	0.22	2.45048e-21	T1
GABARAP	1.11602e-25	-0.272205	0.441	0.586	4.08474e-21	T1
MXRA8	1.26258e-25	0.525268	0.318	0.247	4.62117e-21	T1
RBFOX2	1.84471e-25	0.499539	0.426	0.368	6.75181e-21	T1
TLE4	2.7877e-25	-0.278229	0.271	0.41	1.02033e-20	T1
IFI6	3.04322e-25	-0.303182	0.15	0.26	1.11385e-20	T1
MLLT10	3.26736e-25	0.494538	0.263	0.191	1.19588e-20	T1
PPP1CC	3.38851e-25	-0.256153	0.16	0.275	1.24023e-20	T1
IER5L	3.57063e-25	-0.273858	0.164	0.278	1.30689e-20	T1
ELF2	3.73911e-25	0.541962	0.293	0.225	1.36855e-20	T1
EPC1	4.31804e-25	0.505682	0.365	0.3	1.58045e-20	T1
PDCD4	5.7384e-25	-0.311103	0.327	0.467	2.10031e-20	T1
CDK13	6.14779e-25	0.516572	0.31	0.237	2.25015e-20	T1
CDKN1C	6.90032e-25	-0.287706	0.284	0.419	2.52559e-20	T1
YBX3	6.9979e-25	-0.402796	0.338	0.48	2.5613e-20	T1
ZBTB16	7.92601e-25	-0.293623	0.161	0.27	2.901e-20	T1
XRN1	9.00157e-25	0.493156	0.267	0.195	3.29466e-20	T1
C12orf57	1.06956e-24	-0.290098	0.458	0.584	3.91469e-20	T1
CCN1	1.0757e-24	-0.434335	0.276	0.395	3.93716e-20	T1
MTR	1.35051e-24	0.439749	0.25	0.177	4.94299e-20	T1
KAT6B	1.61289e-24	0.50314	0.353	0.287	5.90332e-20	T1
OSR2	2.88223e-24	-0.33333	0.225	0.346	1.05493e-19	T1
FBXO11	8.40474e-24	0.46373	0.301	0.23	3.07622e-19	T1
ZC2HC1A	1.05975e-23	0.469291	0.26	0.194	3.87878e-19	T1
HELZ	1.16363e-23	0.453644	0.285	0.214	4.259e-19	T1
TIMP1	1.76485e-23	0.509836	0.669	0.65	6.45951e-19	T1
GLUL	4.89848e-23	-0.333677	0.311	0.44	1.79289e-18	T1
FNDC3A	7.12149e-23	0.45149	0.307	0.24	2.60654e-18	T1
ZNF280D	8.26495e-23	0.462704	0.335	0.269	3.02505e-18	T1
ITFG1	8.93152e-23	0.551883	0.256	0.191	3.26902e-18	T1
DMD	1.99963e-22	0.547986	0.283	0.215	7.31886e-18	T1
PPDPF	2.39429e-22	-0.273399	0.408	0.538	8.76334e-18	T1
SH3D19	3.01809e-22	0.541626	0.358	0.297	1.10465e-17	T1
NOTCH2	3.42849e-22	0.40338	0.284	0.213	1.25486e-17	T1
USP34	5.51271e-22	0.459469	0.362	0.3	2.01771e-17	T1
SERPINH1	5.84624e-22	-0.250987	0.198	0.313	2.13978e-17	T1
UBE2K	6.40691e-22	0.493556	0.254	0.19	2.34499e-17	T1
USP15	1.07763e-21	0.446268	0.254	0.189	3.94423e-17	T1
SERBP1	1.31296e-21	-0.254852	0.328	0.461	4.80557e-17	T1
MAF	1.33177e-21	-0.317008	0.322	0.449	4.8744e-17	T1
PPP3CA	1.47093e-21	0.561339	0.312	0.249	5.38375e-17	T1
GASK1B	1.68333e-21	-0.28025	0.209	0.32	6.16117e-17	T1
CLDN11	1.95032e-21	-0.27258	0.221	0.336	7.13836e-17	T1
XPO1	2.18015e-21	0.462719	0.386	0.327	7.97956e-17	T1
ARID4B	2.91647e-21	0.448036	0.341	0.281	1.06746e-16	T1
LHFPL6	4.5775e-21	0.865846	0.378	0.34	1.67541e-16	T1
HNRNPA3	4.84707e-21	-0.256762	0.382	0.52	1.77408e-16	T1
SNHG14	5.92818e-21	0.321828	0.488	0.424	2.16977e-16	T1
DNM3OS	8.90288e-21	0.411208	0.252	0.186	3.25854e-16	T1
ZNF518A	9.01899e-21	0.42977	0.265	0.198	3.30104e-16	T1
OGT	1.29201e-20	0.399312	0.292	0.224	4.72889e-16	T1
COL16A1	2.21424e-20	-0.2891	0.192	0.298	8.10435e-16	T1
ASH1L	2.27195e-20	0.386657	0.44	0.383	8.31555e-16	T1
CTNND1	6.2064e-20	0.476498	0.258	0.198	2.2716e-15	T1
SENP7	6.87447e-20	0.462	0.281	0.22	2.51612e-15	T1
MTRNR2L12	1.14878e-19	-0.332616	0.721	0.765	4.20465e-15	T1
FBXW11	2.23152e-19	0.476946	0.25	0.192	8.1676e-15	T1
TTC3	2.81505e-19	0.338301	0.534	0.5	1.03034e-14	T1
MRC2	4.15967e-19	0.402952	0.316	0.253	1.52248e-14	T1
UACA	6.59163e-19	0.463451	0.331	0.273	2.4126e-14	T1
IRF2BPL	6.6399e-19	-0.259706	0.172	0.269	2.43027e-14	T1
THBS2	6.81364e-19	0.446637	0.272	0.209	2.49386e-14	T1
TUBA1A	6.99406e-19	-0.257962	0.411	0.532	2.5599e-14	T1
OSBPL8	7.78189e-19	0.496672	0.263	0.206	2.84825e-14	T1
CNOT4	8.17204e-19	0.495485	0.275	0.221	2.99105e-14	T1
PSAP	1.03359e-18	0.277065	0.667	0.647	3.78306e-14	T1
RPRD2	1.42037e-18	0.468806	0.26	0.202	5.19869e-14	T1
ARHGAP10	1.4264e-18	0.450787	0.316	0.259	5.22078e-14	T1
COL5A1	1.95783e-18	0.441849	0.282	0.218	7.16584e-14	T1
IGFBP4	2.68777e-18	-0.274119	0.512	0.633	9.8375e-14	T1
TSPAN4	4.37306e-18	0.440769	0.335	0.284	1.60058e-13	T1
MEF2A	5.9713e-18	0.483246	0.316	0.263	2.18556e-13	T1
AOPEP	6.09008e-18	0.589387	0.299	0.25	2.22903e-13	T1
ANGPTL1	7.35712e-18	0.374303	0.275	0.209	2.69278e-13	T1
NCOR1	1.62923e-17	0.451603	0.323	0.272	5.96314e-13	T1
MEG8	1.9564e-17	0.311285	0.263	0.198	7.16061e-13	T1
SPARC	2.31608e-17	-0.252135	0.489	0.608	8.47708e-13	T1
CAST	2.82519e-17	0.43596	0.374	0.328	1.03405e-12	T1
MT-ND5	5.081e-17	-0.31109	0.825	0.846	1.8597e-12	T1
ROCK1	5.97074e-17	0.443761	0.276	0.221	2.18535e-12	T1
[truncated: 4,217 more rows]
