# Supplementary material for: Primary human ovarian interstitial cells contribute to murine follicle growth through follicle-interstitial paracrine crosstalk
Source: Research Square preprint supplement (doi:10.21203/rs.3.rs-7593401/v1), 2025-09-24
Supplement: Supplementary file 9 [file Supplementary Table 3.xlsx]

## Sheet: 3A_annotation
Supplementary Table 3A. Data file annotations for proteomics analysis.
Abbreviations: CC, co-culture; CM, conditioned media; D0, [experimental] day 0; D7, [experimental] day 7; Pre, prepubertal; Post, postpubertal.
DataFile	Condition	BioReplicate	IsotypeLabelType
8aug24_Sunkyung_C1b-DIA_60spd_S3-B2_1_7140	Pre_D0	1	L
8aug24_Sunkyung_C5-DIA_60spd_S3-B6_1_7144	Pre_D7_CM	1	L
8aug24_Sunkyung_C6-DIA_60spd_S3-B7_1_7145	Post_D7_CM	6	L
8aug24_Sunkyung_D1-DIA_60spd_S3-C2_1_7147	Pre_D0	2	L
8aug24_Sunkyung_D2-DIA_60spd_S3-C3_1_7148	Post_D0	7	L
8aug24_Sunkyung_D6-DIA_60spd_S3-C7_1_7152	Post_D7_CM	7	L
8aug24_Sunkyung_E1-DIA_60spd_S3-D2_1_7154	Pre_D0	3	L
8aug24_Sunkyung_E2-DIA_60spd_S3-D3_1_7155	Post_D0	8	L
8aug24_Sunkyung_E5-DIA_60spd_S3-D6_1_7158	Pre_D7_CM	3	L
8aug24_Sunkyung_F2-DIA_60spd_S3-E3_1_7162	Post_D0	9	L
8aug24_Sunkyung_F3-DIA_60spd_S3-E4_1_7163	Pre_D7_CC	4	L
8aug24_Sunkyung_F5-DIA_60spd_S3-E6_1_7165	Pre_D7_CM	4	L
8aug24_Sunkyung_F6-DIA_60spd_S3-E7_1_7166	Post_D7_CM	9	L
8aug24_Sunkyung_G1-DIA_60spd_S3-F2_1_7168	Pre_D0	5	L
8aug24_Sunkyung_G5-DIA_60spd_S3-F6_1_7172	Pre_D7_CM	5	L
8aug24_Sunkyung_C2-DIA_60spd_S3-B3_1_7141	Post_D0	6	L
8aug24_Sunkyung_C3-DIA_60spd_S3-B4_1_7142	Pre_D7_CC	1	L
8aug24_Sunkyung_C4-DIA_60spd_S3-B5_1_7143	Post_D7_CC	6	L
8aug24_Sunkyung_D3-DIA_60spd_S3-C4_1_7149	Pre_D7_CC	2	L
8aug24_Sunkyung_D4-DIA_60spd_S3-C5_1_7150	Post_D7_CC	7	L
8aug24_Sunkyung_D5-DIA_60spd_S3-C6_1_7151	Pre_D7_CM	2	L
8aug24_Sunkyung_E4-DIA_60spd_S3-D5_1_7157	Post_D7_CC	8	L
8aug24_Sunkyung_E6-DIA_60spd_S3-D7_1_7159	Post_D7_CM	8	L
8aug24_Sunkyung_F1-DIA_60spd_S3-E2_1_7161	Pre_D0	4	L
8aug24_Sunkyung_F4-DIA_60spd_S3-E5_1_7164	Post_D7_CC	9	L
8aug24_Sunkyung_G2-DIA_60spd_S3-F3_1_7169	Post_D0	10	L
8aug24_Sunkyung_G3-DIA_60spd_S3-F4_1_7170	Pre_D7_CC	5	L
8aug24_Sunkyung_G4-DIA_60spd_S3-F5_1_7171	Post_D7_CC	10	L
8aug24_Sunkyung_G6-DIA_60spd_S3-F7_1_7173	Post_D7_CM	10	L
8aug24_Sunkyung_E3-DIA_60spd_S3-D4_1_7156	Pre_D7_CC	3	L

## Sheet: 3B_intensities-per-sample
Supplementary Table 3B. Log intensities of identified proteins per sample.
Abbreviations: CC, co-culture; CM, conditioned media; D0, [experimental] day 0; D7, [experimental] day 7; Pre, prepubertal; Post, postpubertal.
RUN	LogIntensities	originalRUN	GROUP	SUBJECT	TotalGroupMeasurements	NumMeasuredFeature	MissingPercentage	more50missing	NumImputedFeature	Protein	UniprotID	Potential_contaminant	Subject_group
2	7.08191	8aug24_Sunkyung_D2-DIA_60spd_S3-C3_1_7148	Post_D0	7	9	9	0	FALSE	0	SEPT8_HUMAN	Q92599	FALSE	7_Post_D0
7	7.01683	8aug24_Sunkyung_D4-DIA_60spd_S3-C5_1_7150	Post_D7_CC	7	9	9	0	FALSE	0	SEPT8_HUMAN	Q92599	FALSE	7_Post_D7_CC
12	5.9768	8aug24_Sunkyung_D6-DIA_60spd_S3-C7_1_7152	Post_D7_CM	7	9	9	0	FALSE	0	SEPT8_HUMAN	Q92599	FALSE	7_Post_D7_CM
16	7.28986	8aug24_Sunkyung_C1b-DIA_60spd_S3-B2_1_7140	Pre_D0	1	18	9	0	FALSE	0	SEPT8_HUMAN	Q92599	FALSE	1_Pre_D0
20	7.68903	8aug24_Sunkyung_G1-DIA_60spd_S3-F2_1_7168	Pre_D0	5	18	9	0	FALSE	0	SEPT8_HUMAN	Q92599	FALSE	5_Pre_D0
21	6.89171	8aug24_Sunkyung_C3-DIA_60spd_S3-B4_1_7142	Pre_D7_CC	1	27	9	0	FALSE	0	SEPT8_HUMAN	Q92599	FALSE	1_Pre_D7_CC
24	7.71556	8aug24_Sunkyung_F3-DIA_60spd_S3-E4_1_7163	Pre_D7_CC	4	27	9	0	FALSE	0	SEPT8_HUMAN	Q92599	FALSE	4_Pre_D7_CC
25	6.46454	8aug24_Sunkyung_G3-DIA_60spd_S3-F4_1_7170	Pre_D7_CC	5	27	9	0	FALSE	0	SEPT8_HUMAN	Q92599	FALSE	5_Pre_D7_CC
28	7.00704	8aug24_Sunkyung_E5-DIA_60spd_S3-D6_1_7158	Pre_D7_CM	3	27	9	0	FALSE	0	SEPT8_HUMAN	Q92599	FALSE	3_Pre_D7_CM
29	7.59104	8aug24_Sunkyung_F5-DIA_60spd_S3-E6_1_7165	Pre_D7_CM	4	27	9	0	FALSE	0	SEPT8_HUMAN	Q92599	FALSE	4_Pre_D7_CM
30	6.98727	8aug24_Sunkyung_G5-DIA_60spd_S3-F6_1_7172	Pre_D7_CM	5	27	9	0	FALSE	0	SEPT8_HUMAN	Q92599	FALSE	5_Pre_D7_CM
2	6.41171	8aug24_Sunkyung_D2-DIA_60spd_S3-C3_1_7148	Post_D0	7	54	10	0.6	TRUE	0	SEPT9_HUMAN	Q9UHD8	FALSE	7_Post_D0
3	6.1802	8aug24_Sunkyung_E2-DIA_60spd_S3-D3_1_7155	Post_D0	8	54	22	0.12	FALSE	0	SEPT9_HUMAN	Q9UHD8	FALSE	8_Post_D0
4	6.21436	8aug24_Sunkyung_F2-DIA_60spd_S3-E3_1_7162	Post_D0	9	54	10	0.6	TRUE	0	SEPT9_HUMAN	Q9UHD8	FALSE	9_Post_D0
5	4.8236	8aug24_Sunkyung_G2-DIA_60spd_S3-F3_1_7169	Post_D0	10	54	12	0.52	TRUE	0	SEPT9_HUMAN	Q9UHD8	FALSE	10_Post_D0
12	5.46576	8aug24_Sunkyung_D6-DIA_60spd_S3-C7_1_7152	Post_D7_CM	7	37	22	0.12	FALSE	0	SEPT9_HUMAN	Q9UHD8	FALSE	7_Post_D7_CM
14	6.12854	8aug24_Sunkyung_F6-DIA_60spd_S3-E7_1_7166	Post_D7_CM	9	37	15	0.4	FALSE	0	SEPT9_HUMAN	Q9UHD8	FALSE	9_Post_D7_CM
16	6.06565	8aug24_Sunkyung_C1b-DIA_60spd_S3-B2_1_7140	Pre_D0	1	59	12	0.52	TRUE	0	SEPT9_HUMAN	Q9UHD8	FALSE	1_Pre_D0
18	6.19419	8aug24_Sunkyung_E1-DIA_60spd_S3-D2_1_7154	Pre_D0	3	59	12	0.52	TRUE	0	SEPT9_HUMAN	Q9UHD8	FALSE	3_Pre_D0
19	6.0385	8aug24_Sunkyung_F1-DIA_60spd_S3-E2_1_7161	Pre_D0	4	59	10	0.6	TRUE	0	SEPT9_HUMAN	Q9UHD8	FALSE	4_Pre_D0
20	6.98118	8aug24_Sunkyung_G1-DIA_60spd_S3-F2_1_7168	Pre_D0	5	59	25	0	FALSE	0	SEPT9_HUMAN	Q9UHD8	FALSE	5_Pre_D0
22	5.55482	8aug24_Sunkyung_D3-DIA_60spd_S3-C4_1_7149	Pre_D7_CC	2	15	3	0.88	TRUE	0	SEPT9_HUMAN	Q9UHD8	FALSE	2_Pre_D7_CC
24	6.36946	8aug24_Sunkyung_F3-DIA_60spd_S3-E4_1_7163	Pre_D7_CC	4	15	12	0.52	TRUE	0	SEPT9_HUMAN	Q9UHD8	FALSE	4_Pre_D7_CC
27	5.72271	8aug24_Sunkyung_D5-DIA_60spd_S3-C6_1_7151	Pre_D7_CM	2	57	10	0.6	TRUE	0	SEPT9_HUMAN	Q9UHD8	FALSE	2_Pre_D7_CM
29	6.29732	8aug24_Sunkyung_F5-DIA_60spd_S3-E6_1_7165	Pre_D7_CM	4	57	25	0	FALSE	0	SEPT9_HUMAN	Q9UHD8	FALSE	4_Pre_D7_CM
30	6.24819	8aug24_Sunkyung_G5-DIA_60spd_S3-F6_1_7172	Pre_D7_CM	5	57	22	0.12	FALSE	0	SEPT9_HUMAN	Q9UHD8	FALSE	5_Pre_D7_CM
1	6.53019	8aug24_Sunkyung_C2-DIA_60spd_S3-B3_1_7141	Post_D0	6	138	12	0.647059	TRUE	0	1433B_HUMAN	P31946	FALSE	6_Post_D0
2	7.48487	8aug24_Sunkyung_D2-DIA_60spd_S3-C3_1_7148	Post_D0	7	138	24	0.294118	FALSE	0	1433B_HUMAN	P31946	FALSE	7_Post_D0
3	7.91598	8aug24_Sunkyung_E2-DIA_60spd_S3-D3_1_7155	Post_D0	8	138	34	0	FALSE	0	1433B_HUMAN	P31946	FALSE	8_Post_D0
4	7.90136	8aug24_Sunkyung_F2-DIA_60spd_S3-E3_1_7162	Post_D0	9	138	34	0	FALSE	0	1433B_HUMAN	P31946	FALSE	9_Post_D0
5	7.2308	8aug24_Sunkyung_G2-DIA_60spd_S3-F3_1_7169	Post_D0	10	138	34	0	FALSE	0	1433B_HUMAN	P31946	FALSE	10_Post_D0
6	7.26753	8aug24_Sunkyung_C4-DIA_60spd_S3-B5_1_7143	Post_D7_CC	6	102	22	0.352941	FALSE	0	1433B_HUMAN	P31946	FALSE	6_Post_D7_CC
7	7.44001	8aug24_Sunkyung_D4-DIA_60spd_S3-C5_1_7150	Post_D7_CC	7	102	24	0.294118	FALSE	0	1433B_HUMAN	P31946	FALSE	7_Post_D7_CC
8	7.45799	8aug24_Sunkyung_E4-DIA_60spd_S3-D5_1_7157	Post_D7_CC	8	102	12	0.647059	TRUE	0	1433B_HUMAN	P31946	FALSE	8_Post_D7_CC
9	7.2354	8aug24_Sunkyung_F4-DIA_60spd_S3-E5_1_7164	Post_D7_CC	9	102	22	0.352941	FALSE	0	1433B_HUMAN	P31946	FALSE	9_Post_D7_CC
10	6.79306	8aug24_Sunkyung_G4-DIA_60spd_S3-F5_1_7171	Post_D7_CC	10	102	22	0.352941	FALSE	0	1433B_HUMAN	P31946	FALSE	10_Post_D7_CC
11	6.31882	8aug24_Sunkyung_C6-DIA_60spd_S3-B7_1_7145	Post_D7_CM	6	138	22	0.352941	FALSE	0	1433B_HUMAN	P31946	FALSE	6_Post_D7_CM
12	7.8823	8aug24_Sunkyung_D6-DIA_60spd_S3-C7_1_7152	Post_D7_CM	7	138	34	0	FALSE	0	1433B_HUMAN	P31946	FALSE	7_Post_D7_CM
13	7.28919	8aug24_Sunkyung_E6-DIA_60spd_S3-D7_1_7159	Post_D7_CM	8	138	24	0.294118	FALSE	0	1433B_HUMAN	P31946	FALSE	8_Post_D7_CM
14	7.5654	8aug24_Sunkyung_F6-DIA_60spd_S3-E7_1_7166	Post_D7_CM	9	138	34	0	FALSE	0	1433B_HUMAN	P31946	FALSE	9_Post_D7_CM
15	7.5823	8aug24_Sunkyung_G6-DIA_60spd_S3-F7_1_7173	Post_D7_CM	10	138	24	0.294118	FALSE	0	1433B_HUMAN	P31946	FALSE	10_Post_D7_CM
16	6.9592	8aug24_Sunkyung_C1b-DIA_60spd_S3-B2_1_7140	Pre_D0	1	138	24	0.294118	FALSE	0	1433B_HUMAN	P31946	FALSE	1_Pre_D0
17	7.50168	8aug24_Sunkyung_D1-DIA_60spd_S3-C2_1_7147	Pre_D0	2	138	24	0.294118	FALSE	0	1433B_HUMAN	P31946	FALSE	2_Pre_D0
18	7.37602	8aug24_Sunkyung_E1-DIA_60spd_S3-D2_1_7154	Pre_D0	3	138	34	0	FALSE	0	1433B_HUMAN	P31946	FALSE	3_Pre_D0
19	7.63965	8aug24_Sunkyung_F1-DIA_60spd_S3-E2_1_7161	Pre_D0	4	138	22	0.352941	FALSE	0	1433B_HUMAN	P31946	FALSE	4_Pre_D0
20	8.62794	8aug24_Sunkyung_G1-DIA_60spd_S3-F2_1_7168	Pre_D0	5	138	34	0	FALSE	0	1433B_HUMAN	P31946	FALSE	5_Pre_D0
21	7.03719	8aug24_Sunkyung_C3-DIA_60spd_S3-B4_1_7142	Pre_D7_CC	1	126	34	0	FALSE	0	1433B_HUMAN	P31946	FALSE	1_Pre_D7_CC
22	7.15065	8aug24_Sunkyung_D3-DIA_60spd_S3-C4_1_7149	Pre_D7_CC	2	126	24	0.294118	FALSE	0	1433B_HUMAN	P31946	FALSE	2_Pre_D7_CC
23	6.86916	8aug24_Sunkyung_E3-DIA_60spd_S3-D4_1_7156	Pre_D7_CC	3	126	12	0.647059	TRUE	0	1433B_HUMAN	P31946	FALSE	3_Pre_D7_CC
24	7.11357	8aug24_Sunkyung_F3-DIA_60spd_S3-E4_1_7163	Pre_D7_CC	4	126	34	0	FALSE	0	1433B_HUMAN	P31946	FALSE	4_Pre_D7_CC
25	6.38255	8aug24_Sunkyung_G3-DIA_60spd_S3-F4_1_7170	Pre_D7_CC	5	126	22	0.352941	FALSE	0	1433B_HUMAN	P31946	FALSE	5_Pre_D7_CC
26	7.0666	8aug24_Sunkyung_C5-DIA_60spd_S3-B6_1_7144	Pre_D7_CM	1	128	12	0.647059	TRUE	0	1433B_HUMAN	P31946	FALSE	1_Pre_D7_CM
27	7.01255	8aug24_Sunkyung_D5-DIA_60spd_S3-C6_1_7151	Pre_D7_CM	2	128	24	0.294118	FALSE	0	1433B_HUMAN	P31946	FALSE	2_Pre_D7_CM
28	8.09298	8aug24_Sunkyung_E5-DIA_60spd_S3-D6_1_7158	Pre_D7_CM	3	128	24	0.294118	FALSE	0	1433B_HUMAN	P31946	FALSE	3_Pre_D7_CM
29	7.72792	8aug24_Sunkyung_F5-DIA_60spd_S3-E6_1_7165	Pre_D7_CM	4	128	34	0	FALSE	0	1433B_HUMAN	P31946	FALSE	4_Pre_D7_CM
30	7.22777	8aug24_Sunkyung_G5-DIA_60spd_S3-F6_1_7172	Pre_D7_CM	5	128	34	0	FALSE	0	1433B_HUMAN	P31946	FALSE	5_Pre_D7_CM
3	7.80895	8aug24_Sunkyung_E2-DIA_60spd_S3-D3_1_7155	Post_D0	8	36	12	0	FALSE	0	1433F_HUMAN	Q04917	FALSE	8_Post_D0
4	7.38493	8aug24_Sunkyung_F2-DIA_60spd_S3-E3_1_7162	Post_D0	9	36	12	0	FALSE	0	1433F_HUMAN	Q04917	FALSE	9_Post_D0
5	6.98745	8aug24_Sunkyung_G2-DIA_60spd_S3-F3_1_7169	Post_D0	10	36	12	0	FALSE	0	1433F_HUMAN	Q04917	FALSE	10_Post_D0
12	6.81256	8aug24_Sunkyung_D6-DIA_60spd_S3-C7_1_7152	Post_D7_CM	7	24	12	0	FALSE	0	1433F_HUMAN	Q04917	FALSE	7_Post_D7_CM
14	7.43365	8aug24_Sunkyung_F6-DIA_60spd_S3-E7_1_7166	Post_D7_CM	9	24	12	0	FALSE	0	1433F_HUMAN	Q04917	FALSE	9_Post_D7_CM
16	6.81506	8aug24_Sunkyung_C1b-DIA_60spd_S3-B2_1_7140	Pre_D0	1	48	12	0	FALSE	0	1433F_HUMAN	Q04917	FALSE	1_Pre_D0
17	5.98793	8aug24_Sunkyung_D1-DIA_60spd_S3-C2_1_7147	Pre_D0	2	48	12	0	FALSE	0	1433F_HUMAN	Q04917	FALSE	2_Pre_D0
18	7.40883	8aug24_Sunkyung_E1-DIA_60spd_S3-D2_1_7154	Pre_D0	3	48	12	0	FALSE	0	1433F_HUMAN	Q04917	FALSE	3_Pre_D0
20	8.66547	8aug24_Sunkyung_G1-DIA_60spd_S3-F2_1_7168	Pre_D0	5	48	12	0	FALSE	0	1433F_HUMAN	Q04917	FALSE	5_Pre_D0
23	6.72535	8aug24_Sunkyung_E3-DIA_60spd_S3-D4_1_7156	Pre_D7_CC	3	12	12	0	FALSE	0	1433F_HUMAN	Q04917	FALSE	3_Pre_D7_CC
28	6.2168	8aug24_Sunkyung_E5-DIA_60spd_S3-D6_1_7158	Pre_D7_CM	3	24	12	0	FALSE	0	1433F_HUMAN	Q04917	FALSE	3_Pre_D7_CM
29	6.91021	8aug24_Sunkyung_F5-DIA_60spd_S3-E6_1_7165	Pre_D7_CM	4	24	12	0	FALSE	0	1433F_HUMAN	Q04917	FALSE	4_Pre_D7_CM
1	7.13583	8aug24_Sunkyung_C2-DIA_60spd_S3-B3_1_7141	Post_D0	6	110	22	0	FALSE	0	1433S_HUMAN	P31947	FALSE	6_Post_D0
2	8.3049	8aug24_Sunkyung_D2-DIA_60spd_S3-C3_1_7148	Post_D0	7	110	22	0	FALSE	0	1433S_HUMAN	P31947	FALSE	7_Post_D0
3	8.157	8aug24_Sunkyung_E2-DIA_60spd_S3-D3_1_7155	Post_D0	8	110	22	0	FALSE	0	1433S_HUMAN	P31947	FALSE	8_Post_D0
4	7.77629	8aug24_Sunkyung_F2-DIA_60spd_S3-E3_1_7162	Post_D0	9	110	22	0	FALSE	0	1433S_HUMAN	P31947	FALSE	9_Post_D0
5	7.53183	8aug24_Sunkyung_G2-DIA_60spd_S3-F3_1_7169	Post_D0	10	110	22	0	FALSE	0	1433S_HUMAN	P31947	FALSE	10_Post_D0
6	7.17521	8aug24_Sunkyung_C4-DIA_60spd_S3-B5_1_7143	Post_D7_CC	6	110	22	0	FALSE	0	1433S_HUMAN	P31947	FALSE	6_Post_D7_CC
7	7.40234	8aug24_Sunkyung_D4-DIA_60spd_S3-C5_1_7150	Post_D7_CC	7	110	22	0	FALSE	0	1433S_HUMAN	P31947	FALSE	7_Post_D7_CC
8	7.53183	8aug24_Sunkyung_E4-DIA_60spd_S3-D5_1_7157	Post_D7_CC	8	110	22	0	FALSE	0	1433S_HUMAN	P31947	FALSE	8_Post_D7_CC
9	8.13825	8aug24_Sunkyung_F4-DIA_60spd_S3-E5_1_7164	Post_D7_CC	9	110	22	0	FALSE	0	1433S_HUMAN	P31947	FALSE	9_Post_D7_CC
10	7.71957	8aug24_Sunkyung_G4-DIA_60spd_S3-F5_1_7171	Post_D7_CC	10	110	22	0	FALSE	0	1433S_HUMAN	P31947	FALSE	10_Post_D7_CC
11	6.96973	8aug24_Sunkyung_C6-DIA_60spd_S3-B7_1_7145	Post_D7_CM	6	99	22	0	FALSE	0	1433S_HUMAN	P31947	FALSE	6_Post_D7_CM
12	8.02745	8aug24_Sunkyung_D6-DIA_60spd_S3-C7_1_7152	Post_D7_CM	7	99	22	0	FALSE	0	1433S_HUMAN	P31947	FALSE	7_Post_D7_CM
13	8.01742	8aug24_Sunkyung_E6-DIA_60spd_S3-D7_1_7159	Post_D7_CM	8	99	22	0	FALSE	0	1433S_HUMAN	P31947	FALSE	8_Post_D7_CM
14	8.90422	8aug24_Sunkyung_F6-DIA_60spd_S3-E7_1_7166	Post_D7_CM	9	99	22	0	FALSE	0	1433S_HUMAN	P31947	FALSE	9_Post_D7_CM
15	8.54978	8aug24_Sunkyung_G6-DIA_60spd_S3-F7_1_7173	Post_D7_CM	10	99	11	0.5	TRUE	0	1433S_HUMAN	P31947	FALSE	10_Post_D7_CM
16	8.18629	8aug24_Sunkyung_C1b-DIA_60spd_S3-B2_1_7140	Pre_D0	1	99	22	0	FALSE	0	1433S_HUMAN	P31947	FALSE	1_Pre_D0
17	7.58043	8aug24_Sunkyung_D1-DIA_60spd_S3-C2_1_7147	Pre_D0	2	99	22	0	FALSE	0	1433S_HUMAN	P31947	FALSE	2_Pre_D0
18	8.14509	8aug24_Sunkyung_E1-DIA_60spd_S3-D2_1_7154	Pre_D0	3	99	22	0	FALSE	0	1433S_HUMAN	P31947	FALSE	3_Pre_D0
19	7.62902	8aug24_Sunkyung_F1-DIA_60spd_S3-E2_1_7161	Pre_D0	4	99	11	0.5	TRUE	0	1433S_HUMAN	P31947	FALSE	4_Pre_D0
20	8.36334	8aug24_Sunkyung_G1-DIA_60spd_S3-F2_1_7168	Pre_D0	5	99	22	0	FALSE	0	1433S_HUMAN	P31947	FALSE	5_Pre_D0
21	7.42771	8aug24_Sunkyung_C3-DIA_60spd_S3-B4_1_7142	Pre_D7_CC	1	110	22	0	FALSE	0	1433S_HUMAN	P31947	FALSE	1_Pre_D7_CC
22	7.60619	8aug24_Sunkyung_D3-DIA_60spd_S3-C4_1_7149	Pre_D7_CC	2	110	22	0	FALSE	0	1433S_HUMAN	P31947	FALSE	2_Pre_D7_CC
23	7.56791	8aug24_Sunkyung_E3-DIA_60spd_S3-D4_1_7156	Pre_D7_CC	3	110	22	0	FALSE	0	1433S_HUMAN	P31947	FALSE	3_Pre_D7_CC
24	8.32505	8aug24_Sunkyung_F3-DIA_60spd_S3-E4_1_7163	Pre_D7_CC	4	110	22	0	FALSE	0	1433S_HUMAN	P31947	FALSE	4_Pre_D7_CC
25	7.49966	8aug24_Sunkyung_G3-DIA_60spd_S3-F4_1_7170	Pre_D7_CC	5	110	22	0	FALSE	0	1433S_HUMAN	P31947	FALSE	5_Pre_D7_CC
26	7.28102	8aug24_Sunkyung_C5-DIA_60spd_S3-B6_1_7144	Pre_D7_CM	1	110	22	0	FALSE	0	1433S_HUMAN	P31947	FALSE	1_Pre_D7_CM
27	7.18421	8aug24_Sunkyung_D5-DIA_60spd_S3-C6_1_7151	Pre_D7_CM	2	110	22	0	FALSE	0	1433S_HUMAN	P31947	FALSE	2_Pre_D7_CM
28	7.54129	8aug24_Sunkyung_E5-DIA_60spd_S3-D6_1_7158	Pre_D7_CM	3	110	22	0	FALSE	0	1433S_HUMAN	P31947	FALSE	3_Pre_D7_CM
29	8.89265	8aug24_Sunkyung_F5-DIA_60spd_S3-E6_1_7165	Pre_D7_CM	4	110	22	0	FALSE	0	1433S_HUMAN	P31947	FALSE	4_Pre_D7_CM
30	8.61376	8aug24_Sunkyung_G5-DIA_60spd_S3-F6_1_7172	Pre_D7_CM	5	110	22	0	FALSE	0	1433S_HUMAN	P31947	FALSE	5_Pre_D7_CM
1	6.59943	8aug24_Sunkyung_C2-DIA_60spd_S3-B3_1_7141	Post_D0	6	362	36	0.675676	TRUE	0	1433Z_HUMAN	P63104	FALSE	6_Post_D0
2	7.30824	8aug24_Sunkyung_D2-DIA_60spd_S3-C3_1_7148	Post_D0	7	362	72	0.351351	FALSE	0	1433Z_HUMAN	P63104	FALSE	7_Post_D0
3	7.32754	8aug24_Sunkyung_E2-DIA_60spd_S3-D3_1_7155	Post_D0	8	362	100	0.0990991	FALSE	0	1433Z_HUMAN	P63104	FALSE	8_Post_D0
4	7.48367	8aug24_Sunkyung_F2-DIA_60spd_S3-E3_1_7162	Post_D0	9	362	83	0.252252	FALSE	0	1433Z_HUMAN	P63104	FALSE	9_Post_D0
5	7.1762	8aug24_Sunkyung_G2-DIA_60spd_S3-F3_1_7169	Post_D0	10	362	71	0.36036	FALSE	0	1433Z_HUMAN	P63104	FALSE	10_Post_D0
6	6.54613	8aug24_Sunkyung_C4-DIA_60spd_S3-B5_1_7143	Post_D7_CC	6	330	48	0.567568	TRUE	0	1433Z_HUMAN	P63104	FALSE	6_Post_D7_CC
7	7.02115	8aug24_Sunkyung_D4-DIA_60spd_S3-C5_1_7150	Post_D7_CC	7	330	59	0.468468	FALSE	0	1433Z_HUMAN	P63104	FALSE	7_Post_D7_CC
8	7.02199	8aug24_Sunkyung_E4-DIA_60spd_S3-D5_1_7157	Post_D7_CC	8	330	60	0.459459	FALSE	0	1433Z_HUMAN	P63104	FALSE	8_Post_D7_CC
9	7.17334	8aug24_Sunkyung_F4-DIA_60spd_S3-E5_1_7164	Post_D7_CC	9	330	68	0.387387	FALSE	0	1433Z_HUMAN	P63104	FALSE	9_Post_D7_CC
10	7.24009	8aug24_Sunkyung_G4-DIA_60spd_S3-F5_1_7171	Post_D7_CC	10	330	95	0.144144	FALSE	0	1433Z_HUMAN	P63104	FALSE	10_Post_D7_CC
11	7.0249	8aug24_Sunkyung_C6-DIA_60spd_S3-B7_1_7145	Post_D7_CM	6	373	24	0.783784	TRUE	0	1433Z_HUMAN	P63104	FALSE	6_Post_D7_CM
12	9.9217	8aug24_Sunkyung_D6-DIA_60spd_S3-C7_1_7152	Post_D7_CM	7	373	111	0	FALSE	0	1433Z_HUMAN	P63104	FALSE	7_Post_D7_CM
13	7.39412	8aug24_Sunkyung_E6-DIA_60spd_S3-D7_1_7159	Post_D7_CM	8	373	72	0.351351	FALSE	0	1433Z_HUMAN	P63104	FALSE	8_Post_D7_CM
14	7.59739	8aug24_Sunkyung_F6-DIA_60spd_S3-E7_1_7166	Post_D7_CM	9	373	95	0.144144	FALSE	0	1433Z_HUMAN	P63104	FALSE	9_Post_D7_CM
15	7.36234	8aug24_Sunkyung_G6-DIA_60spd_S3-F7_1_7173	Post_D7_CM	10	373	71	0.36036	FALSE	0	1433Z_HUMAN	P63104	FALSE	10_Post_D7_CM
16	7.2432	8aug24_Sunkyung_C1b-DIA_60spd_S3-B2_1_7140	Pre_D0	1	374	72	0.351351	FALSE	0	1433Z_HUMAN	P63104	FALSE	1_Pre_D0
17	7.07498	8aug24_Sunkyung_D1-DIA_60spd_S3-C2_1_7147	Pre_D0	2	374	60	0.459459	FALSE	0	1433Z_HUMAN	P63104	FALSE	2_Pre_D0
18	7.27592	8aug24_Sunkyung_E1-DIA_60spd_S3-D2_1_7154	Pre_D0	3	374	71	0.36036	FALSE	0	1433Z_HUMAN	P63104	FALSE	3_Pre_D0
19	7.19037	8aug24_Sunkyung_F1-DIA_60spd_S3-E2_1_7161	Pre_D0	4	374	60	0.459459	FALSE	0	1433Z_HUMAN	P63104	FALSE	4_Pre_D0
20	7.92242	8aug24_Sunkyung_G1-DIA_60spd_S3-F2_1_7168	Pre_D0	5	374	111	0	FALSE	0	1433Z_HUMAN	P63104	FALSE	5_Pre_D0
21	6.83093	8aug24_Sunkyung_C3-DIA_60spd_S3-B4_1_7142	Pre_D7_CC	1	274	59	0.468468	FALSE	0	1433Z_HUMAN	P63104	FALSE	1_Pre_D7_CC
22	7.07246	8aug24_Sunkyung_D3-DIA_60spd_S3-C4_1_7149	Pre_D7_CC	2	274	72	0.351351	FALSE	0	1433Z_HUMAN	P63104	FALSE	2_Pre_D7_CC
23	7.02105	8aug24_Sunkyung_E3-DIA_60spd_S3-D4_1_7156	Pre_D7_CC	3	274	36	0.675676	TRUE	0	1433Z_HUMAN	P63104	FALSE	3_Pre_D7_CC
24	7.24009	8aug24_Sunkyung_F3-DIA_60spd_S3-E4_1_7163	Pre_D7_CC	4	274	83	0.252252	FALSE	0	1433Z_HUMAN	P63104	FALSE	4_Pre_D7_CC
25	6.99281	8aug24_Sunkyung_G3-DIA_60spd_S3-F4_1_7170	Pre_D7_CC	5	274	24	0.783784	TRUE	0	1433Z_HUMAN	P63104	FALSE	5_Pre_D7_CC
26	6.55854	8aug24_Sunkyung_C5-DIA_60spd_S3-B6_1_7144	Pre_D7_CM	1	386	48	0.567568	TRUE	0	1433Z_HUMAN	P63104	FALSE	1_Pre_D7_CM
27	7.1008	8aug24_Sunkyung_D5-DIA_60spd_S3-C6_1_7151	Pre_D7_CM	2	386	60	0.459459	FALSE	0	1433Z_HUMAN	P63104	FALSE	2_Pre_D7_CM
28	7.35027	8aug24_Sunkyung_E5-DIA_60spd_S3-D6_1_7158	Pre_D7_CM	3	386	72	0.351351	FALSE	0	1433Z_HUMAN	P63104	FALSE	3_Pre_D7_CM
29	7.42542	8aug24_Sunkyung_F5-DIA_60spd_S3-E6_1_7165	Pre_D7_CM	4	386	111	0	FALSE	0	1433Z_HUMAN	P63104	FALSE	4_Pre_D7_CM
30	7.1229	8aug24_Sunkyung_G5-DIA_60spd_S3-F6_1_7172	Pre_D7_CM	5	386	95	0.144144	FALSE	0	1433Z_HUMAN	P63104	FALSE	5_Pre_D7_CM
3	6.56107	8aug24_Sunkyung_E2-DIA_60spd_S3-D3_1_7155	Post_D0	8	46	35	0.23913	FALSE	0	6PGD_HUMAN	P52209	FALSE	8_Post_D0
4	1.28249	8aug24_Sunkyung_F2-DIA_60spd_S3-E3_1_7162	Post_D0	9	46	11	0.76087	TRUE	0	6PGD_HUMAN	P52209	FALSE	9_Post_D0
6	5.04865	8aug24_Sunkyung_C4-DIA_60spd_S3-B5_1_7143	Post_D7_CC	6	47	12	0.73913	TRUE	0	6PGD_HUMAN	P52209	FALSE	6_Post_D7_CC
9	7.4961	8aug24_Sunkyung_F4-DIA_60spd_S3-E5_1_7164	Post_D7_CC	9	47	12	0.73913	TRUE	0	6PGD_HUMAN	P52209	FALSE	9_Post_D7_CC
10	5.93469	8aug24_Sunkyung_G4-DIA_60spd_S3-F5_1_7171	Post_D7_CC	10	47	23	0.5	TRUE	0	6PGD_HUMAN	P52209	FALSE	10_Post_D7_CC
12	6.97722	8aug24_Sunkyung_D6-DIA_60spd_S3-C7_1_7152	Post_D7_CM	7	116	46	0	FALSE	0	6PGD_HUMAN	P52209	FALSE	7_Post_D7_CM
13	6.41777	8aug24_Sunkyung_E6-DIA_60spd_S3-D7_1_7159	Post_D7_CM	8	116	12	0.73913	TRUE	0	6PGD_HUMAN	P52209	FALSE	8_Post_D7_CM
14	7.48208	8aug24_Sunkyung_F6-DIA_60spd_S3-E7_1_7166	Post_D7_CM	9	116	46	0	FALSE	0	6PGD_HUMAN	P52209	FALSE	9_Post_D7_CM
15	4.48689	8aug24_Sunkyung_G6-DIA_60spd_S3-F7_1_7173	Post_D7_CM	10	116	12	0.73913	TRUE	0	6PGD_HUMAN	P52209	FALSE	10_Post_D7_CM
17	4.98693	8aug24_Sunkyung_D1-DIA_60spd_S3-C2_1_7147	Pre_D0	2	47	12	0.73913	TRUE	0	6PGD_HUMAN	P52209	FALSE	2_Pre_D0
18	3.35248	8aug24_Sunkyung_E1-DIA_60spd_S3-D2_1_7154	Pre_D0	3	47	11	0.76087	TRUE	0	6PGD_HUMAN	P52209	FALSE	3_Pre_D0
20	7.31579	8aug24_Sunkyung_G1-DIA_60spd_S3-F2_1_7168	Pre_D0	5	47	24	0.478261	FALSE	0	6PGD_HUMAN	P52209	FALSE	5_Pre_D0
24	7.20692	8aug24_Sunkyung_F3-DIA_60spd_S3-E4_1_7163	Pre_D7_CC	4	12	12	0.73913	TRUE	0	6PGD_HUMAN	P52209	FALSE	4_Pre_D7_CC
28	7.07403	8aug24_Sunkyung_E5-DIA_60spd_S3-D6_1_7158	Pre_D7_CM	3	93	12	0.73913	TRUE	0	6PGD_HUMAN	P52209	FALSE	3_Pre_D7_CM
29	7.17463	8aug24_Sunkyung_F5-DIA_60spd_S3-E6_1_7165	Pre_D7_CM	4	93	46	0	FALSE	0	6PGD_HUMAN	P52209	FALSE	4_Pre_D7_CM
30	7.07838	8aug24_Sunkyung_G5-DIA_60spd_S3-F6_1_7172	Pre_D7_CM	5	93	35	0.23913	FALSE	0	6PGD_HUMAN	P52209	FALSE	5_Pre_D7_CM
2	6.13826	8aug24_Sunkyung_D2-DIA_60spd_S3-C3_1_7148	Post_D0	7	96	24	0	FALSE	0	6PGL_HUMAN	O95336	FALSE	7_Post_D0
3	6.18619	8aug24_Sunkyung_E2-DIA_60spd_S3-D3_1_7155	Post_D0	8	96	24	0	FALSE	0	6PGL_HUMAN	O95336	FALSE	8_Post_D0
4	6.18554	8aug24_Sunkyung_F2-DIA_60spd_S3-E3_1_7162	Post_D0	9	96	24	0	FALSE	0	6PGL_HUMAN	O95336	FALSE	9_Post_D0
5	6.37197	8aug24_Sunkyung_G2-DIA_60spd_S3-F3_1_7169	Post_D0	10	96	24	0	FALSE	0	6PGL_HUMAN	O95336	FALSE	10_Post_D0
6	4.20679	8aug24_Sunkyung_C4-DIA_60spd_S3-B5_1_7143	Post_D7_CC	6	96	12	0.5	TRUE	0	6PGL_HUMAN	O95336	FALSE	6_Post_D7_CC
7	5.39055	8aug24_Sunkyung_D4-DIA_60spd_S3-C5_1_7150	Post_D7_CC	7	96	24	0	FALSE	0	6PGL_HUMAN	O95336	FALSE	7_Post_D7_CC
8	4.85889	8aug24_Sunkyung_E4-DIA_60spd_S3-D5_1_7157	Post_D7_CC	8	96	24	0	FALSE	0	6PGL_HUMAN	O95336	FALSE	8_Post_D7_CC
9	5.61543	8aug24_Sunkyung_F4-DIA_60spd_S3-E5_1_7164	Post_D7_CC	9	96	24	0	FALSE	0	6PGL_HUMAN	O95336	FALSE	9_Post_D7_CC
10	6.20975	8aug24_Sunkyung_G4-DIA_60spd_S3-F5_1_7171	Post_D7_CC	10	96	12	0.5	TRUE	0	6PGL_HUMAN	O95336	FALSE	10_Post_D7_CC
11	4.85889	8aug24_Sunkyung_C6-DIA_60spd_S3-B7_1_7145	Post_D7_CM	6	108	24	0	FALSE	0	6PGL_HUMAN	O95336	FALSE	6_Post_D7_CM
12	7.64427	8aug24_Sunkyung_D6-DIA_60spd_S3-C7_1_7152	Post_D7_CM	7	108	24	0	FALSE	0	6PGL_HUMAN	O95336	FALSE	7_Post_D7_CM
13	5.73306	8aug24_Sunkyung_E6-DIA_60spd_S3-D7_1_7159	Post_D7_CM	8	108	24	0	FALSE	0	6PGL_HUMAN	O95336	FALSE	8_Post_D7_CM
14	6.55941	8aug24_Sunkyung_F6-DIA_60spd_S3-E7_1_7166	Post_D7_CM	9	108	24	0	FALSE	0	6PGL_HUMAN	O95336	FALSE	9_Post_D7_CM
15	6.48325	8aug24_Sunkyung_G6-DIA_60spd_S3-F7_1_7173	Post_D7_CM	10	108	12	0.5	TRUE	0	6PGL_HUMAN	O95336	FALSE	10_Post_D7_CM
16	5.64489	8aug24_Sunkyung_C1b-DIA_60spd_S3-B2_1_7140	Pre_D0	1	96	12	0.5	TRUE	0	6PGL_HUMAN	O95336	FALSE	1_Pre_D0
17	5.96489	8aug24_Sunkyung_D1-DIA_60spd_S3-C2_1_7147	Pre_D0	2	96	24	0	FALSE	0	6PGL_HUMAN	O95336	FALSE	2_Pre_D0
18	6.10052	8aug24_Sunkyung_E1-DIA_60spd_S3-D2_1_7154	Pre_D0	3	96	24	0	FALSE	0	6PGL_HUMAN	O95336	FALSE	3_Pre_D0
19	4.40706	8aug24_Sunkyung_F1-DIA_60spd_S3-E2_1_7161	Pre_D0	4	96	12	0.5	TRUE	0	6PGL_HUMAN	O95336	FALSE	4_Pre_D0
20	5.59467	8aug24_Sunkyung_G1-DIA_60spd_S3-F2_1_7168	Pre_D0	5	96	24	0	FALSE	0	6PGL_HUMAN	O95336	FALSE	5_Pre_D0
21	4.87111	8aug24_Sunkyung_C3-DIA_60spd_S3-B4_1_7142	Pre_D7_CC	1	84	12	0.5	TRUE	0	6PGL_HUMAN	O95336	FALSE	1_Pre_D7_CC
22	5.74922	8aug24_Sunkyung_D3-DIA_60spd_S3-C4_1_7149	Pre_D7_CC	2	84	24	0	FALSE	0	6PGL_HUMAN	O95336	FALSE	2_Pre_D7_CC
23	6.1787	8aug24_Sunkyung_E3-DIA_60spd_S3-D4_1_7156	Pre_D7_CC	3	84	24	0	FALSE	0	6PGL_HUMAN	O95336	FALSE	3_Pre_D7_CC
24	5.81695	8aug24_Sunkyung_F3-DIA_60spd_S3-E4_1_7163	Pre_D7_CC	4	84	24	0	FALSE	0	6PGL_HUMAN	O95336	FALSE	4_Pre_D7_CC
26	5.60561	8aug24_Sunkyung_C5-DIA_60spd_S3-B6_1_7144	Pre_D7_CM	1	72	12	0.5	TRUE	0	6PGL_HUMAN	O95336	FALSE	1_Pre_D7_CM
28	5.01068	8aug24_Sunkyung_E5-DIA_60spd_S3-D6_1_7158	Pre_D7_CM	3	72	12	0.5	TRUE	0	6PGL_HUMAN	O95336	FALSE	3_Pre_D7_CM
29	6.48957	8aug24_Sunkyung_F5-DIA_60spd_S3-E6_1_7165	Pre_D7_CM	4	72	24	0	FALSE	0	6PGL_HUMAN	O95336	FALSE	4_Pre_D7_CM
30	6.26107	8aug24_Sunkyung_G5-DIA_60spd_S3-F6_1_7172	Pre_D7_CM	5	72	24	0	FALSE	0	6PGL_HUMAN	O95336	FALSE	5_Pre_D7_CM
1	6.8977	8aug24_Sunkyung_C2-DIA_60spd_S3-B3_1_7141	Post_D0	6	81	12	0.478261	FALSE	0	A2MG_HUMAN	P01023	FALSE	6_Post_D0
2	7.95698	8aug24_Sunkyung_D2-DIA_60spd_S3-C3_1_7148	Post_D0	7	81	12	0.478261	FALSE	0	A2MG_HUMAN	P01023	FALSE	7_Post_D0
3	7.38382	8aug24_Sunkyung_E2-DIA_60spd_S3-D3_1_7155	Post_D0	8	81	23	0	FALSE	0	A2MG_HUMAN	P01023	FALSE	8_Post_D0
4	7.91999	8aug24_Sunkyung_F2-DIA_60spd_S3-E3_1_7162	Post_D0	9	81	11	0.521739	TRUE	0	A2MG_HUMAN	P01023	FALSE	9_Post_D0
5	6.42556	8aug24_Sunkyung_G2-DIA_60spd_S3-F3_1_7169	Post_D0	10	81	23	0	FALSE	0	A2MG_HUMAN	P01023	FALSE	10_Post_D0
7	7.77049	8aug24_Sunkyung_D4-DIA_60spd_S3-C5_1_7150	Post_D7_CC	7	36	12	0.478261	FALSE	0	A2MG_HUMAN	P01023	FALSE	7_Post_D7_CC
8	7.04948	8aug24_Sunkyung_E4-DIA_60spd_S3-D5_1_7157	Post_D7_CC	8	36	12	0.478261	FALSE	0	A2MG_HUMAN	P01023	FALSE	8_Post_D7_CC
10	7.3385	8aug24_Sunkyung_G4-DIA_60spd_S3-F5_1_7171	Post_D7_CC	10	36	12	0.478261	FALSE	0	A2MG_HUMAN	P01023	FALSE	10_Post_D7_CC
11	7.88158	8aug24_Sunkyung_C6-DIA_60spd_S3-B7_1_7145	Post_D7_CM	6	57	11	0.521739	TRUE	0	A2MG_HUMAN	P01023	FALSE	6_Post_D7_CM
12	7.77506	8aug24_Sunkyung_D6-DIA_60spd_S3-C7_1_7152	Post_D7_CM	7	57	23	0	FALSE	0	A2MG_HUMAN	P01023	FALSE	7_Post_D7_CM
13	7.22563	8aug24_Sunkyung_E6-DIA_60spd_S3-D7_1_7159	Post_D7_CM	8	57	23	0	FALSE	0	A2MG_HUMAN	P01023	FALSE	8_Post_D7_CM
17	7.7331	8aug24_Sunkyung_D1-DIA_60spd_S3-C2_1_7147	Pre_D0	2	34	23	0	FALSE	0	A2MG_HUMAN	P01023	FALSE	2_Pre_D0
18	7.40979	8aug24_Sunkyung_E1-DIA_60spd_S3-D2_1_7154	Pre_D0	3	34	11	0.521739	TRUE	0	A2MG_HUMAN	P01023	FALSE	3_Pre_D0
21	7.90481	8aug24_Sunkyung_C3-DIA_60spd_S3-B4_1_7142	Pre_D7_CC	1	34	23	0	FALSE	0	A2MG_HUMAN	P01023	FALSE	1_Pre_D7_CC
23	6.75007	8aug24_Sunkyung_E3-DIA_60spd_S3-D4_1_7156	Pre_D7_CC	3	34	11	0.521739	TRUE	0	A2MG_HUMAN	P01023	FALSE	3_Pre_D7_CC
26	7.52596	8aug24_Sunkyung_C5-DIA_60spd_S3-B6_1_7144	Pre_D7_CM	1	34	11	0.521739	TRUE	0	A2MG_HUMAN	P01023	FALSE	1_Pre_D7_CM
28	8.06879	8aug24_Sunkyung_E5-DIA_60spd_S3-D6_1_7158	Pre_D7_CM	3	34	23	0	FALSE	0	A2MG_HUMAN	P01023	FALSE	3_Pre_D7_CM
2	7.8534	8aug24_Sunkyung_D2-DIA_60spd_S3-C3_1_7148	Post_D0	7	40	10	0	FALSE	0	AACT_HUMAN	P01011	FALSE	7_Post_D0
3	8.37834	8aug24_Sunkyung_E2-DIA_60spd_S3-D3_1_7155	Post_D0	8	40	10	0	FALSE	0	AACT_HUMAN	P01011	FALSE	8_Post_D0
4	9.81209	8aug24_Sunkyung_F2-DIA_60spd_S3-E3_1_7162	Post_D0	9	40	10	0	FALSE	0	AACT_HUMAN	P01011	FALSE	9_Post_D0
5	7.65368	8aug24_Sunkyung_G2-DIA_60spd_S3-F3_1_7169	Post_D0	10	40	10	0	FALSE	0	AACT_HUMAN	P01011	FALSE	10_Post_D0
8	7.41771	8aug24_Sunkyung_E4-DIA_60spd_S3-D5_1_7157	Post_D7_CC	8	10	10	0	FALSE	0	AACT_HUMAN	P01011	FALSE	8_Post_D7_CC
12	7.07618	8aug24_Sunkyung_D6-DIA_60spd_S3-C7_1_7152	Post_D7_CM	7	30	10	0	FALSE	0	AACT_HUMAN	P01011	FALSE	7_Post_D7_CM
13	6.75294	8aug24_Sunkyung_E6-DIA_60spd_S3-D7_1_7159	Post_D7_CM	8	30	10	0	FALSE	0	AACT_HUMAN	P01011	FALSE	8_Post_D7_CM
14	6.94742	8aug24_Sunkyung_F6-DIA_60spd_S3-E7_1_7166	Post_D7_CM	9	30	10	0	FALSE	0	AACT_HUMAN	P01011	FALSE	9_Post_D7_CM
18	8.59707	8aug24_Sunkyung_E1-DIA_60spd_S3-D2_1_7154	Pre_D0	3	20	10	0	FALSE	0	AACT_HUMAN	P01011	FALSE	3_Pre_D0
19	7.26927	8aug24_Sunkyung_F1-DIA_60spd_S3-E2_1_7161	Pre_D0	4	20	10	0	FALSE	0	AACT_HUMAN	P01011	FALSE	4_Pre_D0
21	8.46767	8aug24_Sunkyung_C3-DIA_60spd_S3-B4_1_7142	Pre_D7_CC	1	20	10	0	FALSE	0	AACT_HUMAN	P01011	FALSE	1_Pre_D7_CC
22	7.69308	8aug24_Sunkyung_D3-DIA_60spd_S3-C4_1_7149	Pre_D7_CC	2	20	10	0	FALSE	0	AACT_HUMAN	P01011	FALSE	2_Pre_D7_CC
26	8.95431	8aug24_Sunkyung_C5-DIA_60spd_S3-B6_1_7144	Pre_D7_CM	1	30	10	0	FALSE	0	AACT_HUMAN	P01011	FALSE	1_Pre_D7_CM
28	8.80633	8aug24_Sunkyung_E5-DIA_60spd_S3-D6_1_7158	Pre_D7_CM	3	30	10	0	FALSE	0	AACT_HUMAN	P01011	FALSE	3_Pre_D7_CM
29	7.51559	8aug24_Sunkyung_F5-DIA_60spd_S3-E6_1_7165	Pre_D7_CM	4	30	10	0	FALSE	0	AACT_HUMAN	P01011	FALSE	4_Pre_D7_CM
2	6.84372	8aug24_Sunkyung_D2-DIA_60spd_S3-C3_1_7148	Post_D0	7	48	12	0.5	TRUE	0	AATC_HUMAN	P17174	FALSE	7_Post_D0
4	6.34459	8aug24_Sunkyung_F2-DIA_60spd_S3-E3_1_7162	Post_D0	9	48	12	0.5	TRUE	0	AATC_HUMAN	P17174	FALSE	9_Post_D0
5	6.39449	8aug24_Sunkyung_G2-DIA_60spd_S3-F3_1_7169	Post_D0	10	48	24	0	FALSE	0	AATC_HUMAN	P17174	FALSE	10_Post_D0
7	7.1733	8aug24_Sunkyung_D4-DIA_60spd_S3-C5_1_7150	Post_D7_CC	7	24	12	0.5	TRUE	0	AATC_HUMAN	P17174	FALSE	7_Post_D7_CC
9	6.72148	8aug24_Sunkyung_F4-DIA_60spd_S3-E5_1_7164	Post_D7_CC	9	24	12	0.5	TRUE	0	AATC_HUMAN	P17174	FALSE	9_Post_D7_CC
12	7.85755	8aug24_Sunkyung_D6-DIA_60spd_S3-C7_1_7152	Post_D7_CM	7	72	24	0	FALSE	0	AATC_HUMAN	P17174	FALSE	7_Post_D7_CM
13	6.72139	8aug24_Sunkyung_E6-DIA_60spd_S3-D7_1_7159	Post_D7_CM	8	72	24	0	FALSE	0	AATC_HUMAN	P17174	FALSE	8_Post_D7_CM
14	6.53615	8aug24_Sunkyung_F6-DIA_60spd_S3-E7_1_7166	Post_D7_CM	9	72	12	0.5	TRUE	0	AATC_HUMAN	P17174	FALSE	9_Post_D7_CM
15	6.80214	8aug24_Sunkyung_G6-DIA_60spd_S3-F7_1_7173	Post_D7_CM	10	72	12	0.5	TRUE	0	AATC_HUMAN	P17174	FALSE	10_Post_D7_CM
16	7.07679	8aug24_Sunkyung_C1b-DIA_60spd_S3-B2_1_7140	Pre_D0	1	96	24	0	FALSE	0	AATC_HUMAN	P17174	FALSE	1_Pre_D0
17	8.10317	8aug24_Sunkyung_D1-DIA_60spd_S3-C2_1_7147	Pre_D0	2	96	12	0.5	TRUE	0	AATC_HUMAN	P17174	FALSE	2_Pre_D0
18	6.83717	8aug24_Sunkyung_E1-DIA_60spd_S3-D2_1_7154	Pre_D0	3	96	12	0.5	TRUE	0	AATC_HUMAN	P17174	FALSE	3_Pre_D0
19	6.39449	8aug24_Sunkyung_F1-DIA_60spd_S3-E2_1_7161	Pre_D0	4	96	24	0	FALSE	0	AATC_HUMAN	P17174	FALSE	4_Pre_D0
20	6.94413	8aug24_Sunkyung_G1-DIA_60spd_S3-F2_1_7168	Pre_D0	5	96	24	0	FALSE	0	AATC_HUMAN	P17174	FALSE	5_Pre_D0
22	7.92101	8aug24_Sunkyung_D3-DIA_60spd_S3-C4_1_7149	Pre_D7_CC	2	36	12	0.5	TRUE	0	AATC_HUMAN	P17174	FALSE	2_Pre_D7_CC
23	7.16992	8aug24_Sunkyung_E3-DIA_60spd_S3-D4_1_7156	Pre_D7_CC	3	36	12	0.5	TRUE	0	AATC_HUMAN	P17174	FALSE	3_Pre_D7_CC
24	7.11348	8aug24_Sunkyung_F3-DIA_60spd_S3-E4_1_7163	Pre_D7_CC	4	36	12	0.5	TRUE	0	AATC_HUMAN	P17174	FALSE	4_Pre_D7_CC
26	6.20442	8aug24_Sunkyung_C5-DIA_60spd_S3-B6_1_7144	Pre_D7_CM	1	72	12	0.5	TRUE	0	AATC_HUMAN	P17174	FALSE	1_Pre_D7_CM
27	7.56205	8aug24_Sunkyung_D5-DIA_60spd_S3-C6_1_7151	Pre_D7_CM	2	72	12	0.5	TRUE	0	AATC_HUMAN	P17174	FALSE	2_Pre_D7_CM
28	7.43544	8aug24_Sunkyung_E5-DIA_60spd_S3-D6_1_7158	Pre_D7_CM	3	72	12	0.5	TRUE	0	AATC_HUMAN	P17174	FALSE	3_Pre_D7_CM
29	7.00084	8aug24_Sunkyung_F5-DIA_60spd_S3-E6_1_7165	Pre_D7_CM	4	72	24	0	FALSE	0	AATC_HUMAN	P17174	FALSE	4_Pre_D7_CM
30	7.19221	8aug24_Sunkyung_G5-DIA_60spd_S3-F6_1_7172	Pre_D7_CM	5	72	12	0.5	TRUE	0	AATC_HUMAN	P17174	FALSE	5_Pre_D7_CM
1	6.83524	8aug24_Sunkyung_C2-DIA_60spd_S3-B3_1_7141	Post_D0	6	98	12	0.612903	TRUE	0	AATM_HUMAN	P00505	FALSE	6_Post_D0
2	7.7382	8aug24_Sunkyung_D2-DIA_60spd_S3-C3_1_7148	Post_D0	7	98	12	0.612903	TRUE	0	AATM_HUMAN	P00505	FALSE	7_Post_D0
3	7.10979	8aug24_Sunkyung_E2-DIA_60spd_S3-D3_1_7155	Post_D0	8	98	31	0	FALSE	0	AATM_HUMAN	P00505	FALSE	8_Post_D0
4	7.18153	8aug24_Sunkyung_F2-DIA_60spd_S3-E3_1_7162	Post_D0	9	98	31	0	FALSE	0	AATM_HUMAN	P00505	FALSE	9_Post_D0
5	7.50505	8aug24_Sunkyung_G2-DIA_60spd_S3-F3_1_7169	Post_D0	10	98	12	0.612903	TRUE	0	AATM_HUMAN	P00505	FALSE	10_Post_D0
8	7.90916	8aug24_Sunkyung_E4-DIA_60spd_S3-D5_1_7157	Post_D7_CC	8	74	31	0	FALSE	0	AATM_HUMAN	P00505	FALSE	8_Post_D7_CC
9	7.77576	8aug24_Sunkyung_F4-DIA_60spd_S3-E5_1_7164	Post_D7_CC	9	74	31	0	FALSE	0	AATM_HUMAN	P00505	FALSE	9_Post_D7_CC
10	7.62319	8aug24_Sunkyung_G4-DIA_60spd_S3-F5_1_7171	Post_D7_CC	10	74	12	0.612903	TRUE	0	AATM_HUMAN	P00505	FALSE	10_Post_D7_CC
11	6.68651	8aug24_Sunkyung_C6-DIA_60spd_S3-B7_1_7145	Post_D7_CM	6	103	12	0.612903	TRUE	0	AATM_HUMAN	P00505	FALSE	6_Post_D7_CM
12	6.91541	8aug24_Sunkyung_D6-DIA_60spd_S3-C7_1_7152	Post_D7_CM	7	103	24	0.225806	FALSE	0	AATM_HUMAN	P00505	FALSE	7_Post_D7_CM
13	8.06033	8aug24_Sunkyung_E6-DIA_60spd_S3-D7_1_7159	Post_D7_CM	8	103	31	0	FALSE	0	AATM_HUMAN	P00505	FALSE	8_Post_D7_CM
14	7.58448	8aug24_Sunkyung_F6-DIA_60spd_S3-E7_1_7166	Post_D7_CM	9	103	24	0.225806	FALSE	0	AATM_HUMAN	P00505	FALSE	9_Post_D7_CM
15	8.10305	8aug24_Sunkyung_G6-DIA_60spd_S3-F7_1_7173	Post_D7_CM	10	103	12	0.612903	TRUE	0	AATM_HUMAN	P00505	FALSE	10_Post_D7_CM
16	7.0321	8aug24_Sunkyung_C1b-DIA_60spd_S3-B2_1_7140	Pre_D0	1	115	19	0.387097	FALSE	0	AATM_HUMAN	P00505	FALSE	1_Pre_D0
17	7.8012	8aug24_Sunkyung_D1-DIA_60spd_S3-C2_1_7147	Pre_D0	2	115	24	0.225806	FALSE	0	AATM_HUMAN	P00505	FALSE	2_Pre_D0
18	7.38403	8aug24_Sunkyung_E1-DIA_60spd_S3-D2_1_7154	Pre_D0	3	115	24	0.225806	FALSE	0	AATM_HUMAN	P00505	FALSE	3_Pre_D0
19	6.94571	8aug24_Sunkyung_F1-DIA_60spd_S3-E2_1_7161	Pre_D0	4	115	24	0.225806	FALSE	0	AATM_HUMAN	P00505	FALSE	4_Pre_D0
20	7.83502	8aug24_Sunkyung_G1-DIA_60spd_S3-F2_1_7168	Pre_D0	5	115	24	0.225806	FALSE	0	AATM_HUMAN	P00505	FALSE	5_Pre_D0
21	7.10494	8aug24_Sunkyung_C3-DIA_60spd_S3-B4_1_7142	Pre_D7_CC	1	60	24	0.225806	FALSE	0	AATM_HUMAN	P00505	FALSE	1_Pre_D7_CC
23	6.54517	8aug24_Sunkyung_E3-DIA_60spd_S3-D4_1_7156	Pre_D7_CC	3	60	12	0.612903	TRUE	0	AATM_HUMAN	P00505	FALSE	3_Pre_D7_CC
24	7.59098	8aug24_Sunkyung_F3-DIA_60spd_S3-E4_1_7163	Pre_D7_CC	4	60	24	0.225806	FALSE	0	AATM_HUMAN	P00505	FALSE	4_Pre_D7_CC
27	7.1362	8aug24_Sunkyung_D5-DIA_60spd_S3-C6_1_7151	Pre_D7_CM	2	72	12	0.612903	TRUE	0	AATM_HUMAN	P00505	FALSE	2_Pre_D7_CM
28	7.14643	8aug24_Sunkyung_E5-DIA_60spd_S3-D6_1_7158	Pre_D7_CM	3	72	24	0.225806	FALSE	0	AATM_HUMAN	P00505	FALSE	3_Pre_D7_CM
29	7.80074	8aug24_Sunkyung_F5-DIA_60spd_S3-E6_1_7165	Pre_D7_CM	4	72	24	0.225806	FALSE	0	AATM_HUMAN	P00505	FALSE	4_Pre_D7_CM
30	7.73556	8aug24_Sunkyung_G5-DIA_60spd_S3-F6_1_7172	Pre_D7_CM	5	72	12	0.612903	TRUE	0	AATM_HUMAN	P00505	FALSE	5_Pre_D7_CM
1	6.84932	8aug24_Sunkyung_C2-DIA_60spd_S3-B3_1_7141	Post_D0	6	179	36	0.454545	FALSE	0	ACLY_HUMAN	P53396	FALSE	6_Post_D0
2	7.37154	8aug24_Sunkyung_D2-DIA_60spd_S3-C3_1_7148	Post_D0	7	179	33	0.5	TRUE	0	ACLY_HUMAN	P53396	FALSE	7_Post_D0
3	7.83075	8aug24_Sunkyung_E2-DIA_60spd_S3-D3_1_7155	Post_D0	8	179	55	0.166667	FALSE	0	ACLY_HUMAN	P53396	FALSE	8_Post_D0
4	7.17806	8aug24_Sunkyung_F2-DIA_60spd_S3-E3_1_7162	Post_D0	9	179	43	0.348485	FALSE	0	ACLY_HUMAN	P53396	FALSE	9_Post_D0
5	7.64644	8aug24_Sunkyung_G2-DIA_60spd_S3-F3_1_7169	Post_D0	10	179	12	0.818182	TRUE	0	ACLY_HUMAN	P53396	FALSE	10_Post_D0
6	7.13757	8aug24_Sunkyung_C4-DIA_60spd_S3-B5_1_7143	Post_D7_CC	6	176	24	0.636364	TRUE	0	ACLY_HUMAN	P53396	FALSE	6_Post_D7_CC
7	7.1487	8aug24_Sunkyung_D4-DIA_60spd_S3-C5_1_7150	Post_D7_CC	7	176	35	0.469697	FALSE	0	ACLY_HUMAN	P53396	FALSE	7_Post_D7_CC
8	7.45899	8aug24_Sunkyung_E4-DIA_60spd_S3-D5_1_7157	Post_D7_CC	8	176	36	0.454545	FALSE	0	ACLY_HUMAN	P53396	FALSE	8_Post_D7_CC
9	7.1436	8aug24_Sunkyung_F4-DIA_60spd_S3-E5_1_7164	Post_D7_CC	9	176	36	0.454545	FALSE	0	ACLY_HUMAN	P53396	FALSE	9_Post_D7_CC
10	7.32644	8aug24_Sunkyung_G4-DIA_60spd_S3-F5_1_7171	Post_D7_CC	10	176	45	0.318182	FALSE	0	ACLY_HUMAN	P53396	FALSE	10_Post_D7_CC
12	7.05356	8aug24_Sunkyung_D6-DIA_60spd_S3-C7_1_7152	Post_D7_CM	7	225	55	0.166667	FALSE	0	ACLY_HUMAN	P53396	FALSE	7_Post_D7_CM
13	7.44507	8aug24_Sunkyung_E6-DIA_60spd_S3-D7_1_7159	Post_D7_CM	8	225	47	0.287879	FALSE	0	ACLY_HUMAN	P53396	FALSE	8_Post_D7_CM
14	7.79273	8aug24_Sunkyung_F6-DIA_60spd_S3-E7_1_7166	Post_D7_CM	9	225	66	0	FALSE	0	ACLY_HUMAN	P53396	FALSE	9_Post_D7_CM
15	7.40859	8aug24_Sunkyung_G6-DIA_60spd_S3-F7_1_7173	Post_D7_CM	10	225	57	0.136364	FALSE	0	ACLY_HUMAN	P53396	FALSE	10_Post_D7_CM
16	8.03574	8aug24_Sunkyung_C1b-DIA_60spd_S3-B2_1_7140	Pre_D0	1	193	34	0.484848	FALSE	0	ACLY_HUMAN	P53396	FALSE	1_Pre_D0
17	7.12646	8aug24_Sunkyung_D1-DIA_60spd_S3-C2_1_7147	Pre_D0	2	193	36	0.454545	FALSE	0	ACLY_HUMAN	P53396	FALSE	2_Pre_D0
18	7.42959	8aug24_Sunkyung_E1-DIA_60spd_S3-D2_1_7154	Pre_D0	3	193	24	0.636364	TRUE	0	ACLY_HUMAN	P53396	FALSE	3_Pre_D0
19	7.52445	8aug24_Sunkyung_F1-DIA_60spd_S3-E2_1_7161	Pre_D0	4	193	33	0.5	TRUE	0	ACLY_HUMAN	P53396	FALSE	4_Pre_D0
20	8.4407	8aug24_Sunkyung_G1-DIA_60spd_S3-F2_1_7168	Pre_D0	5	193	66	0	FALSE	0	ACLY_HUMAN	P53396	FALSE	5_Pre_D0
21	7.1487	8aug24_Sunkyung_C3-DIA_60spd_S3-B4_1_7142	Pre_D7_CC	1	128	35	0.469697	FALSE	0	ACLY_HUMAN	P53396	FALSE	1_Pre_D7_CC
22	8.44641	8aug24_Sunkyung_D3-DIA_60spd_S3-C4_1_7149	Pre_D7_CC	2	128	12	0.818182	TRUE	0	ACLY_HUMAN	P53396	FALSE	2_Pre_D7_CC
23	7.1487	8aug24_Sunkyung_E3-DIA_60spd_S3-D4_1_7156	Pre_D7_CC	3	128	23	0.651515	TRUE	0	ACLY_HUMAN	P53396	FALSE	3_Pre_D7_CC
24	7.56263	8aug24_Sunkyung_F3-DIA_60spd_S3-E4_1_7163	Pre_D7_CC	4	128	34	0.484848	FALSE	0	ACLY_HUMAN	P53396	FALSE	4_Pre_D7_CC
25	6.14972	8aug24_Sunkyung_G3-DIA_60spd_S3-F4_1_7170	Pre_D7_CC	5	128	24	0.636364	TRUE	0	ACLY_HUMAN	P53396	FALSE	5_Pre_D7_CC
26	7.14161	8aug24_Sunkyung_C5-DIA_60spd_S3-B6_1_7144	Pre_D7_CM	1	173	24	0.636364	TRUE	0	ACLY_HUMAN	P53396	FALSE	1_Pre_D7_CM
28	7.56644	8aug24_Sunkyung_E5-DIA_60spd_S3-D6_1_7158	Pre_D7_CM	3	173	45	0.318182	FALSE	0	ACLY_HUMAN	P53396	FALSE	3_Pre_D7_CM
29	7.78641	8aug24_Sunkyung_F5-DIA_60spd_S3-E6_1_7165	Pre_D7_CM	4	173	57	0.136364	FALSE	0	ACLY_HUMAN	P53396	FALSE	4_Pre_D7_CM
30	7.43845	8aug24_Sunkyung_G5-DIA_60spd_S3-F6_1_7172	Pre_D7_CM	5	173	47	0.287879	FALSE	0	ACLY_HUMAN	P53396	FALSE	5_Pre_D7_CM
3	8.27407	8aug24_Sunkyung_E2-DIA_60spd_S3-D3_1_7155	Post_D0	8	25	8	0.578947	TRUE	0	ACPH_HUMAN	P13798	FALSE	8_Post_D0
4	8.25446	8aug24_Sunkyung_F2-DIA_60spd_S3-E3_1_7162	Post_D0	9	25	8	0.578947	TRUE	0	ACPH_HUMAN	P13798	FALSE	9_Post_D0
5	6.70023	8aug24_Sunkyung_G2-DIA_60spd_S3-F3_1_7169	Post_D0	10	25	9	0.526316	TRUE	0	ACPH_HUMAN	P13798	FALSE	10_Post_D0
7	8.302	8aug24_Sunkyung_D4-DIA_60spd_S3-C5_1_7150	Post_D7_CC	7	8	8	0.578947	TRUE	0	ACPH_HUMAN	P13798	FALSE	7_Post_D7_CC
12	8.52558	8aug24_Sunkyung_D6-DIA_60spd_S3-C7_1_7152	Post_D7_CM	7	28	19	0	FALSE	0	ACPH_HUMAN	P13798	FALSE	7_Post_D7_CM
14	6.97133	8aug24_Sunkyung_F6-DIA_60spd_S3-E7_1_7166	Post_D7_CM	9	28	9	0.526316	TRUE	0	ACPH_HUMAN	P13798	FALSE	9_Post_D7_CM
17	7.26823	8aug24_Sunkyung_D1-DIA_60spd_S3-C2_1_7147	Pre_D0	2	30	9	0.526316	TRUE	0	ACPH_HUMAN	P13798	FALSE	2_Pre_D0
18	7.28951	8aug24_Sunkyung_E1-DIA_60spd_S3-D2_1_7154	Pre_D0	3	30	2	0.894737	TRUE	0	ACPH_HUMAN	P13798	FALSE	3_Pre_D0
20	8.18837	8aug24_Sunkyung_G1-DIA_60spd_S3-F2_1_7168	Pre_D0	5	30	19	0	FALSE	0	ACPH_HUMAN	P13798	FALSE	5_Pre_D0
24	6.63554	8aug24_Sunkyung_F3-DIA_60spd_S3-E4_1_7163	Pre_D7_CC	4	9	9	0.526316	TRUE	0	ACPH_HUMAN	P13798	FALSE	4_Pre_D7_CC
26	7.79117	8aug24_Sunkyung_C5-DIA_60spd_S3-B6_1_7144	Pre_D7_CM	1	33	8	0.578947	TRUE	0	ACPH_HUMAN	P13798	FALSE	1_Pre_D7_CM
29	6.72633	8aug24_Sunkyung_F5-DIA_60spd_S3-E6_1_7165	Pre_D7_CM	4	33	17	0.105263	FALSE	0	ACPH_HUMAN	P13798	FALSE	4_Pre_D7_CM
30	8.15535	8aug24_Sunkyung_G5-DIA_60spd_S3-F6_1_7172	Pre_D7_CM	5	33	8	0.578947	TRUE	0	ACPH_HUMAN	P13798	FALSE	5_Pre_D7_CM
1	7.2785	8aug24_Sunkyung_C2-DIA_60spd_S3-B3_1_7141	Post_D0	6	526	48	0.675676	TRUE	0	ACTN1_HUMAN	P12814	FALSE	6_Post_D0
2	8.32977	8aug24_Sunkyung_D2-DIA_60spd_S3-C3_1_7148	Post_D0	7	526	114	0.22973	FALSE	0	ACTN1_HUMAN	P12814	FALSE	7_Post_D0
3	8.27767	8aug24_Sunkyung_E2-DIA_60spd_S3-D3_1_7155	Post_D0	8	526	148	0	FALSE	0	ACTN1_HUMAN	P12814	FALSE	8_Post_D0
4	7.89735	8aug24_Sunkyung_F2-DIA_60spd_S3-E3_1_7162	Post_D0	9	526	124	0.162162	FALSE	0	ACTN1_HUMAN	P12814	FALSE	9_Post_D0
5	7.68405	8aug24_Sunkyung_G2-DIA_60spd_S3-F3_1_7169	Post_D0	10	526	92	0.378378	FALSE	0	ACTN1_HUMAN	P12814	FALSE	10_Post_D0
6	7.2828	8aug24_Sunkyung_C4-DIA_60spd_S3-B5_1_7143	Post_D7_CC	6	422	59	0.601351	TRUE	0	ACTN1_HUMAN	P12814	FALSE	6_Post_D7_CC
7	7.93769	8aug24_Sunkyung_D4-DIA_60spd_S3-C5_1_7150	Post_D7_CC	7	422	102	0.310811	FALSE	0	ACTN1_HUMAN	P12814	FALSE	7_Post_D7_CC
8	7.73742	8aug24_Sunkyung_E4-DIA_60spd_S3-D5_1_7157	Post_D7_CC	8	422	68	0.540541	TRUE	0	ACTN1_HUMAN	P12814	FALSE	8_Post_D7_CC
9	8.03976	8aug24_Sunkyung_F4-DIA_60spd_S3-E5_1_7164	Post_D7_CC	9	422	114	0.22973	FALSE	0	ACTN1_HUMAN	P12814	FALSE	9_Post_D7_CC
10	7.91	8aug24_Sunkyung_G4-DIA_60spd_S3-F5_1_7171	Post_D7_CC	10	422	79	0.466216	FALSE	0	ACTN1_HUMAN	P12814	FALSE	10_Post_D7_CC
11	7.21204	8aug24_Sunkyung_C6-DIA_60spd_S3-B7_1_7145	Post_D7_CM	6	531	65	0.560811	TRUE	0	ACTN1_HUMAN	P12814	FALSE	6_Post_D7_CM
12	7.40187	8aug24_Sunkyung_D6-DIA_60spd_S3-C7_1_7152	Post_D7_CM	7	531	112	0.243243	FALSE	0	ACTN1_HUMAN	P12814	FALSE	7_Post_D7_CM
13	8.35925	8aug24_Sunkyung_E6-DIA_60spd_S3-D7_1_7159	Post_D7_CM	8	531	127	0.141892	FALSE	0	ACTN1_HUMAN	P12814	FALSE	8_Post_D7_CM
14	7.89187	8aug24_Sunkyung_F6-DIA_60spd_S3-E7_1_7166	Post_D7_CM	9	531	136	0.0810811	FALSE	0	ACTN1_HUMAN	P12814	FALSE	9_Post_D7_CM
15	8.12177	8aug24_Sunkyung_G6-DIA_60spd_S3-F7_1_7173	Post_D7_CM	10	531	91	0.385135	FALSE	0	ACTN1_HUMAN	P12814	FALSE	10_Post_D7_CM
16	8.09275	8aug24_Sunkyung_C1b-DIA_60spd_S3-B2_1_7140	Pre_D0	1	538	70	0.527027	TRUE	0	ACTN1_HUMAN	P12814	FALSE	1_Pre_D0
17	7.55891	8aug24_Sunkyung_D1-DIA_60spd_S3-C2_1_7147	Pre_D0	2	538	103	0.304054	FALSE	0	ACTN1_HUMAN	P12814	FALSE	2_Pre_D0
18	8.17043	8aug24_Sunkyung_E1-DIA_60spd_S3-D2_1_7154	Pre_D0	3	538	137	0.0743243	FALSE	0	ACTN1_HUMAN	P12814	FALSE	3_Pre_D0
19	7.75944	8aug24_Sunkyung_F1-DIA_60spd_S3-E2_1_7161	Pre_D0	4	538	80	0.459459	FALSE	0	ACTN1_HUMAN	P12814	FALSE	4_Pre_D0
20	8.05548	8aug24_Sunkyung_G1-DIA_60spd_S3-F2_1_7168	Pre_D0	5	538	148	0	FALSE	0	ACTN1_HUMAN	P12814	FALSE	5_Pre_D0
21	7.56723	8aug24_Sunkyung_C3-DIA_60spd_S3-B4_1_7142	Pre_D7_CC	1	421	103	0.304054	FALSE	0	ACTN1_HUMAN	P12814	FALSE	1_Pre_D7_CC
22	7.77508	8aug24_Sunkyung_D3-DIA_60spd_S3-C4_1_7149	Pre_D7_CC	2	421	89	0.398649	FALSE	0	ACTN1_HUMAN	P12814	FALSE	2_Pre_D7_CC
23	7.6467	8aug24_Sunkyung_E3-DIA_60spd_S3-D4_1_7156	Pre_D7_CC	3	421	56	0.621622	TRUE	0	ACTN1_HUMAN	P12814	FALSE	3_Pre_D7_CC
24	8.17122	8aug24_Sunkyung_F3-DIA_60spd_S3-E4_1_7163	Pre_D7_CC	4	421	126	0.148649	FALSE	0	ACTN1_HUMAN	P12814	FALSE	4_Pre_D7_CC
25	7.34977	8aug24_Sunkyung_G3-DIA_60spd_S3-F4_1_7170	Pre_D7_CC	5	421	47	0.682432	TRUE	0	ACTN1_HUMAN	P12814	FALSE	5_Pre_D7_CC
26	7.23738	8aug24_Sunkyung_C5-DIA_60spd_S3-B6_1_7144	Pre_D7_CM	1	517	59	0.601351	TRUE	0	ACTN1_HUMAN	P12814	FALSE	1_Pre_D7_CM
27	8.22268	8aug24_Sunkyung_D5-DIA_60spd_S3-C6_1_7151	Pre_D7_CM	2	517	70	0.527027	TRUE	0	ACTN1_HUMAN	P12814	FALSE	2_Pre_D7_CM
28	8.11497	8aug24_Sunkyung_E5-DIA_60spd_S3-D6_1_7158	Pre_D7_CM	3	517	137	0.0743243	FALSE	0	ACTN1_HUMAN	P12814	FALSE	3_Pre_D7_CM
29	8.07495	8aug24_Sunkyung_F5-DIA_60spd_S3-E6_1_7165	Pre_D7_CM	4	517	137	0.0743243	FALSE	0	ACTN1_HUMAN	P12814	FALSE	4_Pre_D7_CM
30	8.45194	8aug24_Sunkyung_G5-DIA_60spd_S3-F6_1_7172	Pre_D7_CM	5	517	114	0.22973	FALSE	0	ACTN1_HUMAN	P12814	FALSE	5_Pre_D7_CM
1	6.3479	8aug24_Sunkyung_C2-DIA_60spd_S3-B3_1_7141	Post_D0	6	944	83	0.711806	TRUE	0	ACTN4_HUMAN	O43707	FALSE	6_Post_D0
2	8.15618	8aug24_Sunkyung_D2-DIA_60spd_S3-C3_1_7148	Post_D0	7	944	186	0.354167	FALSE	0	ACTN4_HUMAN	O43707	FALSE	7_Post_D0
3	8.24415	8aug24_Sunkyung_E2-DIA_60spd_S3-D3_1_7155	Post_D0	8	944	266	0.0763889	FALSE	0	ACTN4_HUMAN	O43707	FALSE	8_Post_D0
4	7.7897	8aug24_Sunkyung_F2-DIA_60spd_S3-E3_1_7162	Post_D0	9	944	240	0.166667	FALSE	0	ACTN4_HUMAN	O43707	FALSE	9_Post_D0
5	7.45092	8aug24_Sunkyung_G2-DIA_60spd_S3-F3_1_7169	Post_D0	10	944	169	0.413194	FALSE	0	ACTN4_HUMAN	O43707	FALSE	10_Post_D0
6	6.98845	8aug24_Sunkyung_C4-DIA_60spd_S3-B5_1_7143	Post_D7_CC	6	925	145	0.496528	FALSE	0	ACTN4_HUMAN	O43707	FALSE	6_Post_D7_CC
7	7.93964	8aug24_Sunkyung_D4-DIA_60spd_S3-C5_1_7150	Post_D7_CC	7	925	173	0.399306	FALSE	0	ACTN4_HUMAN	O43707	FALSE	7_Post_D7_CC
8	7.71499	8aug24_Sunkyung_E4-DIA_60spd_S3-D5_1_7157	Post_D7_CC	8	925	183	0.364583	FALSE	0	ACTN4_HUMAN	O43707	FALSE	8_Post_D7_CC
9	8.11658	8aug24_Sunkyung_F4-DIA_60spd_S3-E5_1_7164	Post_D7_CC	9	925	222	0.229167	FALSE	0	ACTN4_HUMAN	O43707	FALSE	9_Post_D7_CC
10	8.20662	8aug24_Sunkyung_G4-DIA_60spd_S3-F5_1_7171	Post_D7_CC	10	925	202	0.298611	FALSE	0	ACTN4_HUMAN	O43707	FALSE	10_Post_D7_CC
11	6.64455	8aug24_Sunkyung_C6-DIA_60spd_S3-B7_1_7145	Post_D7_CM	6	998	116	0.597222	TRUE	0	ACTN4_HUMAN	O43707	FALSE	6_Post_D7_CM
12	7.90275	8aug24_Sunkyung_D6-DIA_60spd_S3-C7_1_7152	Post_D7_CM	7	998	276	0.0416667	FALSE	0	ACTN4_HUMAN	O43707	FALSE	7_Post_D7_CM
13	8.03464	8aug24_Sunkyung_E6-DIA_60spd_S3-D7_1_7159	Post_D7_CM	8	998	195	0.322917	FALSE	0	ACTN4_HUMAN	O43707	FALSE	8_Post_D7_CM
14	7.91362	8aug24_Sunkyung_F6-DIA_60spd_S3-E7_1_7166	Post_D7_CM	9	998	227	0.211806	FALSE	0	ACTN4_HUMAN	O43707	FALSE	9_Post_D7_CM
15	8.10509	8aug24_Sunkyung_G6-DIA_60spd_S3-F7_1_7173	Post_D7_CM	10	998	184	0.361111	FALSE	0	ACTN4_HUMAN	O43707	FALSE	10_Post_D7_CM
16	7.73184	8aug24_Sunkyung_C1b-DIA_60spd_S3-B2_1_7140	Pre_D0	1	935	178	0.381944	FALSE	0	ACTN4_HUMAN	O43707	FALSE	1_Pre_D0
17	7.69192	8aug24_Sunkyung_D1-DIA_60spd_S3-C2_1_7147	Pre_D0	2	935	181	0.371528	FALSE	0	ACTN4_HUMAN	O43707	FALSE	2_Pre_D0
18	8.437	8aug24_Sunkyung_E1-DIA_60spd_S3-D2_1_7154	Pre_D0	3	935	227	0.211806	FALSE	0	ACTN4_HUMAN	O43707	FALSE	3_Pre_D0
19	7.87126	8aug24_Sunkyung_F1-DIA_60spd_S3-E2_1_7161	Pre_D0	4	935	112	0.611111	TRUE	0	ACTN4_HUMAN	O43707	FALSE	4_Pre_D0
20	8.09335	8aug24_Sunkyung_G1-DIA_60spd_S3-F2_1_7168	Pre_D0	5	935	237	0.177083	FALSE	0	ACTN4_HUMAN	O43707	FALSE	5_Pre_D0
21	7.38234	8aug24_Sunkyung_C3-DIA_60spd_S3-B4_1_7142	Pre_D7_CC	1	937	179	0.378472	FALSE	0	ACTN4_HUMAN	O43707	FALSE	1_Pre_D7_CC
22	7.87735	8aug24_Sunkyung_D3-DIA_60spd_S3-C4_1_7149	Pre_D7_CC	2	937	177	0.385417	FALSE	0	ACTN4_HUMAN	O43707	FALSE	2_Pre_D7_CC
23	7.57436	8aug24_Sunkyung_E3-DIA_60spd_S3-D4_1_7156	Pre_D7_CC	3	937	147	0.489583	FALSE	0	ACTN4_HUMAN	O43707	FALSE	3_Pre_D7_CC
24	8.3466	8aug24_Sunkyung_F3-DIA_60spd_S3-E4_1_7163	Pre_D7_CC	4	937	249	0.135417	FALSE	0	ACTN4_HUMAN	O43707	FALSE	4_Pre_D7_CC
25	7.57418	8aug24_Sunkyung_G3-DIA_60spd_S3-F4_1_7170	Pre_D7_CC	5	937	185	0.357639	FALSE	0	ACTN4_HUMAN	O43707	FALSE	5_Pre_D7_CC
26	7.06728	8aug24_Sunkyung_C5-DIA_60spd_S3-B6_1_7144	Pre_D7_CM	1	974	133	0.538194	TRUE	0	ACTN4_HUMAN	O43707	FALSE	1_Pre_D7_CM
27	7.83399	8aug24_Sunkyung_D5-DIA_60spd_S3-C6_1_7151	Pre_D7_CM	2	974	181	0.371528	FALSE	0	ACTN4_HUMAN	O43707	FALSE	2_Pre_D7_CM
28	7.9614	8aug24_Sunkyung_E5-DIA_60spd_S3-D6_1_7158	Pre_D7_CM	3	974	196	0.319444	FALSE	0	ACTN4_HUMAN	O43707	FALSE	3_Pre_D7_CM
29	8.04975	8aug24_Sunkyung_F5-DIA_60spd_S3-E6_1_7165	Pre_D7_CM	4	974	237	0.177083	FALSE	0	ACTN4_HUMAN	O43707	FALSE	4_Pre_D7_CM
30	8.12941	8aug24_Sunkyung_G5-DIA_60spd_S3-F6_1_7172	Pre_D7_CM	5	974	227	0.211806	FALSE	0	ACTN4_HUMAN	O43707	FALSE	5_Pre_D7_CM
3	8.92824	8aug24_Sunkyung_E2-DIA_60spd_S3-D3_1_7155	Post_D0	8	18	9	0	FALSE	0	ADML_HUMAN	P35318	FALSE	8_Post_D0
4	9.82863	8aug24_Sunkyung_F2-DIA_60spd_S3-E3_1_7162	Post_D0	9	18	9	0	FALSE	0	ADML_HUMAN	P35318	FALSE	9_Post_D0
12	8.10254	8aug24_Sunkyung_D6-DIA_60spd_S3-C7_1_7152	Post_D7_CM	7	18	9	0	FALSE	0	ADML_HUMAN	P35318	FALSE	7_Post_D7_CM
14	8.53272	8aug24_Sunkyung_F6-DIA_60spd_S3-E7_1_7166	Post_D7_CM	9	18	9	0	FALSE	0	ADML_HUMAN	P35318	FALSE	9_Post_D7_CM
17	8.27718	8aug24_Sunkyung_D1-DIA_60spd_S3-C2_1_7147	Pre_D0	2	18	9	0	FALSE	0	ADML_HUMAN	P35318	FALSE	2_Pre_D0
20	8.03343	8aug24_Sunkyung_G1-DIA_60spd_S3-F2_1_7168	Pre_D0	5	18	9	0	FALSE	0	ADML_HUMAN	P35318	FALSE	5_Pre_D0
21	8.00041	8aug24_Sunkyung_C3-DIA_60spd_S3-B4_1_7142	Pre_D7_CC	1	9	9	0	FALSE	0	ADML_HUMAN	P35318	FALSE	1_Pre_D7_CC
26	8.71959	8aug24_Sunkyung_C5-DIA_60spd_S3-B6_1_7144	Pre_D7_CM	1	27	9	0	FALSE	0	ADML_HUMAN	P35318	FALSE	1_Pre_D7_CM
28	7.76737	8aug24_Sunkyung_E5-DIA_60spd_S3-D6_1_7158	Pre_D7_CM	3	27	9	0	FALSE	0	ADML_HUMAN	P35318	FALSE	3_Pre_D7_CM
30	7.46275	8aug24_Sunkyung_G5-DIA_60spd_S3-F6_1_7172	Pre_D7_CM	5	27	9	0	FALSE	0	ADML_HUMAN	P35318	FALSE	5_Pre_D7_CM
3	4.42028	8aug24_Sunkyung_E2-DIA_60spd_S3-D3_1_7155	Post_D0	8	16	8	0	FALSE	0	ADRM1_HUMAN	Q16186	FALSE	8_Post_D0
4	6.95894	8aug24_Sunkyung_F2-DIA_60spd_S3-E3_1_7162	Post_D0	9	16	8	0	FALSE	0	ADRM1_HUMAN	Q16186	FALSE	9_Post_D0
12	5.85286	8aug24_Sunkyung_D6-DIA_60spd_S3-C7_1_7152	Post_D7_CM	7	24	8	0	FALSE	0	ADRM1_HUMAN	Q16186	FALSE	7_Post_D7_CM
13	5.92598	8aug24_Sunkyung_E6-DIA_60spd_S3-D7_1_7159	Post_D7_CM	8	24	8	0	FALSE	0	ADRM1_HUMAN	Q16186	FALSE	8_Post_D7_CM
14	6.93236	8aug24_Sunkyung_F6-DIA_60spd_S3-E7_1_7166	Post_D7_CM	9	24	8	0	FALSE	0	ADRM1_HUMAN	Q16186	FALSE	9_Post_D7_CM
20	7.44759	8aug24_Sunkyung_G1-DIA_60spd_S3-F2_1_7168	Pre_D0	5	8	8	0	FALSE	0	ADRM1_HUMAN	Q16186	FALSE	5_Pre_D0
29	5.28806	8aug24_Sunkyung_F5-DIA_60spd_S3-E6_1_7165	Pre_D7_CM	4	8	8	0	FALSE	0	ADRM1_HUMAN	Q16186	FALSE	4_Pre_D7_CM
1	6.95314	8aug24_Sunkyung_C2-DIA_60spd_S3-B3_1_7141	Post_D0	6	371	55	0.471154	FALSE	0	AEBP1_HUMAN	Q8IUX7	FALSE	6_Post_D0
2	6.79335	8aug24_Sunkyung_D2-DIA_60spd_S3-C3_1_7148	Post_D0	7	371	67	0.355769	FALSE	0	AEBP1_HUMAN	Q8IUX7	FALSE	7_Post_D0
3	7.98331	8aug24_Sunkyung_E2-DIA_60spd_S3-D3_1_7155	Post_D0	8	371	101	0.0288462	FALSE	0	AEBP1_HUMAN	Q8IUX7	FALSE	8_Post_D0
4	8.59217	8aug24_Sunkyung_F2-DIA_60spd_S3-E3_1_7162	Post_D0	9	371	104	0	FALSE	0	AEBP1_HUMAN	Q8IUX7	FALSE	9_Post_D0
5	6.54136	8aug24_Sunkyung_G2-DIA_60spd_S3-F3_1_7169	Post_D0	10	371	44	0.576923	TRUE	0	AEBP1_HUMAN	Q8IUX7	FALSE	10_Post_D0
6	6.88819	8aug24_Sunkyung_C4-DIA_60spd_S3-B5_1_7143	Post_D7_CC	6	78	44	0.576923	TRUE	0	AEBP1_HUMAN	Q8IUX7	FALSE	6_Post_D7_CC
7	6.49611	8aug24_Sunkyung_D4-DIA_60spd_S3-C5_1_7150	Post_D7_CC	7	78	11	0.894231	TRUE	0	AEBP1_HUMAN	Q8IUX7	FALSE	7_Post_D7_CC
8	6.7542	8aug24_Sunkyung_E4-DIA_60spd_S3-D5_1_7157	Post_D7_CC	8	78	23	0.778846	TRUE	0	AEBP1_HUMAN	Q8IUX7	FALSE	8_Post_D7_CC
11	6.05666	8aug24_Sunkyung_C6-DIA_60spd_S3-B7_1_7145	Post_D7_CM	6	210	32	0.692308	TRUE	0	AEBP1_HUMAN	Q8IUX7	FALSE	6_Post_D7_CM
12	6.84748	8aug24_Sunkyung_D6-DIA_60spd_S3-C7_1_7152	Post_D7_CM	7	210	67	0.355769	FALSE	0	AEBP1_HUMAN	Q8IUX7	FALSE	7_Post_D7_CM
13	6.9078	8aug24_Sunkyung_E6-DIA_60spd_S3-D7_1_7159	Post_D7_CM	8	210	44	0.576923	TRUE	0	AEBP1_HUMAN	Q8IUX7	FALSE	8_Post_D7_CM
14	6.7542	8aug24_Sunkyung_F6-DIA_60spd_S3-E7_1_7166	Post_D7_CM	9	210	67	0.355769	FALSE	0	AEBP1_HUMAN	Q8IUX7	FALSE	9_Post_D7_CM
16	7.79759	8aug24_Sunkyung_C1b-DIA_60spd_S3-B2_1_7140	Pre_D0	1	373	90	0.134615	FALSE	0	AEBP1_HUMAN	Q8IUX7	FALSE	1_Pre_D0
17	8.01301	8aug24_Sunkyung_D1-DIA_60spd_S3-C2_1_7147	Pre_D0	2	373	79	0.240385	FALSE	0	AEBP1_HUMAN	Q8IUX7	FALSE	2_Pre_D0
18	8.42866	8aug24_Sunkyung_E1-DIA_60spd_S3-D2_1_7154	Pre_D0	3	373	93	0.105769	FALSE	0	AEBP1_HUMAN	Q8IUX7	FALSE	3_Pre_D0
19	7.00619	8aug24_Sunkyung_F1-DIA_60spd_S3-E2_1_7161	Pre_D0	4	373	67	0.355769	FALSE	0	AEBP1_HUMAN	Q8IUX7	FALSE	4_Pre_D0
20	6.34562	8aug24_Sunkyung_G1-DIA_60spd_S3-F2_1_7168	Pre_D0	5	373	44	0.576923	TRUE	0	AEBP1_HUMAN	Q8IUX7	FALSE	5_Pre_D0
21	6.99632	8aug24_Sunkyung_C3-DIA_60spd_S3-B4_1_7142	Pre_D7_CC	1	153	66	0.365385	FALSE	0	AEBP1_HUMAN	Q8IUX7	FALSE	1_Pre_D7_CC
22	6.93642	8aug24_Sunkyung_D3-DIA_60spd_S3-C4_1_7149	Pre_D7_CC	2	153	44	0.576923	TRUE	0	AEBP1_HUMAN	Q8IUX7	FALSE	2_Pre_D7_CC
23	6.76719	8aug24_Sunkyung_E3-DIA_60spd_S3-D4_1_7156	Pre_D7_CC	3	153	43	0.586538	TRUE	0	AEBP1_HUMAN	Q8IUX7	FALSE	3_Pre_D7_CC
26	6.92979	8aug24_Sunkyung_C5-DIA_60spd_S3-B6_1_7144	Pre_D7_CM	1	203	80	0.230769	FALSE	0	AEBP1_HUMAN	Q8IUX7	FALSE	1_Pre_D7_CM
28	7.11205	8aug24_Sunkyung_E5-DIA_60spd_S3-D6_1_7158	Pre_D7_CM	3	203	56	0.461538	FALSE	0	AEBP1_HUMAN	Q8IUX7	FALSE	3_Pre_D7_CM
29	6.75485	8aug24_Sunkyung_F5-DIA_60spd_S3-E6_1_7165	Pre_D7_CM	4	203	44	0.576923	TRUE	0	AEBP1_HUMAN	Q8IUX7	FALSE	4_Pre_D7_CM
30	6.25953	8aug24_Sunkyung_G5-DIA_60spd_S3-F6_1_7172	Pre_D7_CM	5	203	23	0.778846	TRUE	0	AEBP1_HUMAN	Q8IUX7	FALSE	5_Pre_D7_CM
3	8.04838	8aug24_Sunkyung_E2-DIA_60spd_S3-D3_1_7155	Post_D0	8	42	12	0.333333	FALSE	0	AGM1_HUMAN	O95394	FALSE	8_Post_D0
4	7.48591	8aug24_Sunkyung_F2-DIA_60spd_S3-E3_1_7162	Post_D0	9	42	18	0	FALSE	0	AGM1_HUMAN	O95394	FALSE	9_Post_D0
5	6.0445	8aug24_Sunkyung_G2-DIA_60spd_S3-F3_1_7169	Post_D0	10	42	12	0.333333	FALSE	0	AGM1_HUMAN	O95394	FALSE	10_Post_D0
8	7.65025	8aug24_Sunkyung_E4-DIA_60spd_S3-D5_1_7157	Post_D7_CC	8	24	12	0.333333	FALSE	0	AGM1_HUMAN	O95394	FALSE	8_Post_D7_CC
10	6.58567	8aug24_Sunkyung_G4-DIA_60spd_S3-F5_1_7171	Post_D7_CC	10	24	12	0.333333	FALSE	0	AGM1_HUMAN	O95394	FALSE	10_Post_D7_CC
14	8.08261	8aug24_Sunkyung_F6-DIA_60spd_S3-E7_1_7166	Post_D7_CM	9	30	18	0	FALSE	0	AGM1_HUMAN	O95394	FALSE	9_Post_D7_CM
15	6.52525	8aug24_Sunkyung_G6-DIA_60spd_S3-F7_1_7173	Post_D7_CM	10	30	12	0.333333	FALSE	0	AGM1_HUMAN	O95394	FALSE	10_Post_D7_CM
17	5.70688	8aug24_Sunkyung_D1-DIA_60spd_S3-C2_1_7147	Pre_D0	2	36	12	0.333333	FALSE	0	AGM1_HUMAN	O95394	FALSE	2_Pre_D0
18	6.54177	8aug24_Sunkyung_E1-DIA_60spd_S3-D2_1_7154	Pre_D0	3	36	6	0.666667	TRUE	0	AGM1_HUMAN	O95394	FALSE	3_Pre_D0
20	8.14079	8aug24_Sunkyung_G1-DIA_60spd_S3-F2_1_7168	Pre_D0	5	36	18	0	FALSE	0	AGM1_HUMAN	O95394	FALSE	5_Pre_D0
21	6.52059	8aug24_Sunkyung_C3-DIA_60spd_S3-B4_1_7142	Pre_D7_CC	1	36	12	0.333333	FALSE	0	AGM1_HUMAN	O95394	FALSE	1_Pre_D7_CC
23	5.77578	8aug24_Sunkyung_E3-DIA_60spd_S3-D4_1_7156	Pre_D7_CC	3	36	12	0.333333	FALSE	0	AGM1_HUMAN	O95394	FALSE	3_Pre_D7_CC
24	6.55329	8aug24_Sunkyung_F3-DIA_60spd_S3-E4_1_7163	Pre_D7_CC	4	36	12	0.333333	FALSE	0	AGM1_HUMAN	O95394	FALSE	4_Pre_D7_CC
28	6.4705	8aug24_Sunkyung_E5-DIA_60spd_S3-D6_1_7158	Pre_D7_CM	3	36	12	0.333333	FALSE	0	AGM1_HUMAN	O95394	FALSE	3_Pre_D7_CM
29	8.22727	8aug24_Sunkyung_F5-DIA_60spd_S3-E6_1_7165	Pre_D7_CM	4	36	12	0.333333	FALSE	0	AGM1_HUMAN	O95394	FALSE	4_Pre_D7_CM
30	7.02901	8aug24_Sunkyung_G5-DIA_60spd_S3-F6_1_7172	Pre_D7_CM	5	36	12	0.333333	FALSE	0	AGM1_HUMAN	O95394	FALSE	5_Pre_D7_CM
3	7.98089	8aug24_Sunkyung_E2-DIA_60spd_S3-D3_1_7155	Post_D0	8	113	68	0.244444	FALSE	0	AHNK_HUMAN	Q09666	FALSE	8_Post_D0
4	7.79761	8aug24_Sunkyung_F2-DIA_60spd_S3-E3_1_7162	Post_D0	9	113	33	0.633333	TRUE	0	AHNK_HUMAN	Q09666	FALSE	9_Post_D0
5	6.83012	8aug24_Sunkyung_G2-DIA_60spd_S3-F3_1_7169	Post_D0	10	113	12	0.866667	TRUE	0	AHNK_HUMAN	Q09666	FALSE	10_Post_D0
8	8.2005	8aug24_Sunkyung_E4-DIA_60spd_S3-D5_1_7157	Post_D7_CC	8	54	11	0.877778	TRUE	0	AHNK_HUMAN	Q09666	FALSE	8_Post_D7_CC
10	7.25515	8aug24_Sunkyung_G4-DIA_60spd_S3-F5_1_7171	Post_D7_CC	10	54	43	0.522222	TRUE	0	AHNK_HUMAN	Q09666	FALSE	10_Post_D7_CC
12	8.33437	8aug24_Sunkyung_D6-DIA_60spd_S3-C7_1_7152	Post_D7_CM	7	130	83	0.0777778	FALSE	0	AHNK_HUMAN	Q09666	FALSE	7_Post_D7_CM
14	7.53562	8aug24_Sunkyung_F6-DIA_60spd_S3-E7_1_7166	Post_D7_CM	9	130	47	0.477778	FALSE	0	AHNK_HUMAN	Q09666	FALSE	9_Post_D7_CM
16	7.63954	8aug24_Sunkyung_C1b-DIA_60spd_S3-B2_1_7140	Pre_D0	1	145	22	0.755556	TRUE	0	AHNK_HUMAN	Q09666	FALSE	1_Pre_D0
17	7.00633	8aug24_Sunkyung_D1-DIA_60spd_S3-C2_1_7147	Pre_D0	2	145	31	0.655556	TRUE	0	AHNK_HUMAN	Q09666	FALSE	2_Pre_D0
18	7.07874	8aug24_Sunkyung_E1-DIA_60spd_S3-D2_1_7154	Pre_D0	3	145	11	0.877778	TRUE	0	AHNK_HUMAN	Q09666	FALSE	3_Pre_D0
19	5.55049	8aug24_Sunkyung_F1-DIA_60spd_S3-E2_1_7161	Pre_D0	4	145	12	0.866667	TRUE	0	AHNK_HUMAN	Q09666	FALSE	4_Pre_D0
20	7.99371	8aug24_Sunkyung_G1-DIA_60spd_S3-F2_1_7168	Pre_D0	5	145	69	0.233333	FALSE	0	AHNK_HUMAN	Q09666	FALSE	5_Pre_D0
24	7.28904	8aug24_Sunkyung_F3-DIA_60spd_S3-E4_1_7163	Pre_D7_CC	4	34	11	0.877778	TRUE	0	AHNK_HUMAN	Q09666	FALSE	4_Pre_D7_CC
25	6.78072	8aug24_Sunkyung_G3-DIA_60spd_S3-F4_1_7170	Pre_D7_CC	5	34	23	0.744444	TRUE	0	AHNK_HUMAN	Q09666	FALSE	5_Pre_D7_CC
26	6.95105	8aug24_Sunkyung_C5-DIA_60spd_S3-B6_1_7144	Pre_D7_CM	1	66	23	0.744444	TRUE	0	AHNK_HUMAN	Q09666	FALSE	1_Pre_D7_CM
28	7.76278	8aug24_Sunkyung_E5-DIA_60spd_S3-D6_1_7158	Pre_D7_CM	3	66	7	0.922222	TRUE	0	AHNK_HUMAN	Q09666	FALSE	3_Pre_D7_CM
29	7.40957	8aug24_Sunkyung_F5-DIA_60spd_S3-E6_1_7165	Pre_D7_CM	4	66	31	0.655556	TRUE	0	AHNK_HUMAN	Q09666	FALSE	4_Pre_D7_CM
30	7.33547	8aug24_Sunkyung_G5-DIA_60spd_S3-F6_1_7172	Pre_D7_CM	5	66	5	0.944444	TRUE	0	AHNK_HUMAN	Q09666	FALSE	5_Pre_D7_CM
1	3.02898	8aug24_Sunkyung_C2-DIA_60spd_S3-B3_1_7141	Post_D0	6	64	12	0.454545	FALSE	0	AK1C1_HUMAN;AK1C3_HUMAN	P42330;Q04828	FALSE	6_Post_D0
2	4.97312	8aug24_Sunkyung_D2-DIA_60spd_S3-C3_1_7148	Post_D0	7	64	10	0.545455	TRUE	0	AK1C1_HUMAN;AK1C3_HUMAN	P42330;Q04828	FALSE	7_Post_D0
3	7.19924	8aug24_Sunkyung_E2-DIA_60spd_S3-D3_1_7155	Post_D0	8	64	22	0	FALSE	0	AK1C1_HUMAN;AK1C3_HUMAN	P42330;Q04828	FALSE	8_Post_D0
4	6.16037	8aug24_Sunkyung_F2-DIA_60spd_S3-E3_1_7162	Post_D0	9	64	10	0.545455	TRUE	0	AK1C1_HUMAN;AK1C3_HUMAN	P42330;Q04828	FALSE	9_Post_D0
5	4.80807	8aug24_Sunkyung_G2-DIA_60spd_S3-F3_1_7169	Post_D0	10	64	10	0.545455	TRUE	0	AK1C1_HUMAN;AK1C3_HUMAN	P42330;Q04828	FALSE	10_Post_D0
11	4.56499	8aug24_Sunkyung_C6-DIA_60spd_S3-B7_1_7145	Post_D7_CM	6	76	10	0.545455	TRUE	0	AK1C1_HUMAN;AK1C3_HUMAN	P42330;Q04828	FALSE	6_Post_D7_CM
12	6.69217	8aug24_Sunkyung_D6-DIA_60spd_S3-C7_1_7152	Post_D7_CM	7	76	22	0	FALSE	0	AK1C1_HUMAN;AK1C3_HUMAN	P42330;Q04828	FALSE	7_Post_D7_CM
13	6.15177	8aug24_Sunkyung_E6-DIA_60spd_S3-D7_1_7159	Post_D7_CM	8	76	22	0	FALSE	0	AK1C1_HUMAN;AK1C3_HUMAN	P42330;Q04828	FALSE	8_Post_D7_CM
14	6.44145	8aug24_Sunkyung_F6-DIA_60spd_S3-E7_1_7166	Post_D7_CM	9	76	22	0	FALSE	0	AK1C1_HUMAN;AK1C3_HUMAN	P42330;Q04828	FALSE	9_Post_D7_CM
19	4.80807	8aug24_Sunkyung_F1-DIA_60spd_S3-E2_1_7161	Pre_D0	4	32	10	0.545455	TRUE	0	AK1C1_HUMAN;AK1C3_HUMAN	P42330;Q04828	FALSE	4_Pre_D0
20	6.89149	8aug24_Sunkyung_G1-DIA_60spd_S3-F2_1_7168	Pre_D0	5	32	22	0	FALSE	0	AK1C1_HUMAN;AK1C3_HUMAN	P42330;Q04828	FALSE	5_Pre_D0
22	4.80807	8aug24_Sunkyung_D3-DIA_60spd_S3-C4_1_7149	Pre_D7_CC	2	20	10	0.545455	TRUE	0	AK1C1_HUMAN;AK1C3_HUMAN	P42330;Q04828	FALSE	2_Pre_D7_CC
23	4.89153	8aug24_Sunkyung_E3-DIA_60spd_S3-D4_1_7156	Pre_D7_CC	3	20	10	0.545455	TRUE	0	AK1C1_HUMAN;AK1C3_HUMAN	P42330;Q04828	FALSE	3_Pre_D7_CC
27	0.69937	8aug24_Sunkyung_D5-DIA_60spd_S3-C6_1_7151	Pre_D7_CM	2	66	12	0.454545	FALSE	0	AK1C1_HUMAN;AK1C3_HUMAN	P42330;Q04828	FALSE	2_Pre_D7_CM
28	5.9684	8aug24_Sunkyung_E5-DIA_60spd_S3-D6_1_7158	Pre_D7_CM	3	66	22	0	FALSE	0	AK1C1_HUMAN;AK1C3_HUMAN	P42330;Q04828	FALSE	3_Pre_D7_CM
29	6.41829	8aug24_Sunkyung_F5-DIA_60spd_S3-E6_1_7165	Pre_D7_CM	4	66	22	0	FALSE	0	AK1C1_HUMAN;AK1C3_HUMAN	P42330;Q04828	FALSE	4_Pre_D7_CM
30	4.8967	8aug24_Sunkyung_G5-DIA_60spd_S3-F6_1_7172	Pre_D7_CM	5	66	10	0.545455	TRUE	0	AK1C1_HUMAN;AK1C3_HUMAN	P42330;Q04828	FALSE	5_Pre_D7_CM
3	7.37844	8aug24_Sunkyung_E2-DIA_60spd_S3-D3_1_7155	Post_D0	8	41	26	0	FALSE	0	AKA12_HUMAN	Q02952	FALSE	8_Post_D0
4	7.20771	8aug24_Sunkyung_F2-DIA_60spd_S3-E3_1_7162	Post_D0	9	41	15	0.423077	FALSE	0	AKA12_HUMAN	Q02952	FALSE	9_Post_D0
12	6.31507	8aug24_Sunkyung_D6-DIA_60spd_S3-C7_1_7152	Post_D7_CM	7	66	11	0.576923	TRUE	0	AKA12_HUMAN	Q02952	FALSE	7_Post_D7_CM
13	6.62677	8aug24_Sunkyung_E6-DIA_60spd_S3-D7_1_7159	Post_D7_CM	8	66	22	0.153846	FALSE	0	AKA12_HUMAN	Q02952	FALSE	8_Post_D7_CM
14	7.27945	8aug24_Sunkyung_F6-DIA_60spd_S3-E7_1_7166	Post_D7_CM	9	66	22	0.153846	FALSE	0	AKA12_HUMAN	Q02952	FALSE	9_Post_D7_CM
15	6.31507	8aug24_Sunkyung_G6-DIA_60spd_S3-F7_1_7173	Post_D7_CM	10	66	11	0.576923	TRUE	0	AKA12_HUMAN	Q02952	FALSE	10_Post_D7_CM
16	7.25129	8aug24_Sunkyung_C1b-DIA_60spd_S3-B2_1_7140	Pre_D0	1	92	22	0.153846	FALSE	0	AKA12_HUMAN	Q02952	FALSE	1_Pre_D0
17	6.75269	8aug24_Sunkyung_D1-DIA_60spd_S3-C2_1_7147	Pre_D0	2	92	11	0.576923	TRUE	0	AKA12_HUMAN	Q02952	FALSE	2_Pre_D0
18	7.21889	8aug24_Sunkyung_E1-DIA_60spd_S3-D2_1_7154	Pre_D0	3	92	22	0.153846	FALSE	0	AKA12_HUMAN	Q02952	FALSE	3_Pre_D0
19	6.3973	8aug24_Sunkyung_F1-DIA_60spd_S3-E2_1_7161	Pre_D0	4	92	11	0.576923	TRUE	0	AKA12_HUMAN	Q02952	FALSE	4_Pre_D0
20	6.80087	8aug24_Sunkyung_G1-DIA_60spd_S3-F2_1_7168	Pre_D0	5	92	26	0	FALSE	0	AKA12_HUMAN	Q02952	FALSE	5_Pre_D0
22	7.47974	8aug24_Sunkyung_D3-DIA_60spd_S3-C4_1_7149	Pre_D7_CC	2	22	11	0.576923	TRUE	0	AKA12_HUMAN	Q02952	FALSE	2_Pre_D7_CC
25	6.45635	8aug24_Sunkyung_G3-DIA_60spd_S3-F4_1_7170	Pre_D7_CC	5	22	11	0.576923	TRUE	0	AKA12_HUMAN	Q02952	FALSE	5_Pre_D7_CC
26	6.38479	8aug24_Sunkyung_C5-DIA_60spd_S3-B6_1_7144	Pre_D7_CM	1	22	11	0.576923	TRUE	0	AKA12_HUMAN	Q02952	FALSE	1_Pre_D7_CM
29	7.76345	8aug24_Sunkyung_F5-DIA_60spd_S3-E6_1_7165	Pre_D7_CM	4	22	11	0.576923	TRUE	0	AKA12_HUMAN	Q02952	FALSE	4_Pre_D7_CM
2	8.12124	8aug24_Sunkyung_D2-DIA_60spd_S3-C3_1_7148	Post_D0	7	30	3	0.85	TRUE	0	AL9A1_HUMAN	P49189	FALSE	7_Post_D0
3	6.53046	8aug24_Sunkyung_E2-DIA_60spd_S3-D3_1_7155	Post_D0	8	30	12	0.4	FALSE	0	AL9A1_HUMAN	P49189	FALSE	8_Post_D0
4	5.91607	8aug24_Sunkyung_F2-DIA_60spd_S3-E3_1_7162	Post_D0	9	30	12	0.4	FALSE	0	AL9A1_HUMAN	P49189	FALSE	9_Post_D0
5	8.09583	8aug24_Sunkyung_G2-DIA_60spd_S3-F3_1_7169	Post_D0	10	30	3	0.85	TRUE	0	AL9A1_HUMAN	P49189	FALSE	10_Post_D0
7	5.88847	8aug24_Sunkyung_D4-DIA_60spd_S3-C5_1_7150	Post_D7_CC	7	12	12	0.4	FALSE	0	AL9A1_HUMAN	P49189	FALSE	7_Post_D7_CC
12	8.71387	8aug24_Sunkyung_D6-DIA_60spd_S3-C7_1_7152	Post_D7_CM	7	49	20	0	FALSE	0	AL9A1_HUMAN	P49189	FALSE	7_Post_D7_CM
13	5.97997	8aug24_Sunkyung_E6-DIA_60spd_S3-D7_1_7159	Post_D7_CM	8	49	12	0.4	FALSE	0	AL9A1_HUMAN	P49189	FALSE	8_Post_D7_CM
14	7.04834	8aug24_Sunkyung_F6-DIA_60spd_S3-E7_1_7166	Post_D7_CM	9	49	17	0.15	FALSE	0	AL9A1_HUMAN	P49189	FALSE	9_Post_D7_CM
19	6.43763	8aug24_Sunkyung_F1-DIA_60spd_S3-E2_1_7161	Pre_D0	4	29	12	0.4	FALSE	0	AL9A1_HUMAN	P49189	FALSE	4_Pre_D0
20	6.81774	8aug24_Sunkyung_G1-DIA_60spd_S3-F2_1_7168	Pre_D0	5	29	17	0.15	FALSE	0	AL9A1_HUMAN	P49189	FALSE	5_Pre_D0
24	6.28704	8aug24_Sunkyung_F3-DIA_60spd_S3-E4_1_7163	Pre_D7_CC	4	12	12	0.4	FALSE	0	AL9A1_HUMAN	P49189	FALSE	4_Pre_D7_CC
27	5.97997	8aug24_Sunkyung_D5-DIA_60spd_S3-C6_1_7151	Pre_D7_CM	2	48	12	0.4	FALSE	0	AL9A1_HUMAN	P49189	FALSE	2_Pre_D7_CM
28	5.44176	8aug24_Sunkyung_E5-DIA_60spd_S3-D6_1_7158	Pre_D7_CM	3	48	12	0.4	FALSE	0	AL9A1_HUMAN	P49189	FALSE	3_Pre_D7_CM
29	7.10398	8aug24_Sunkyung_F5-DIA_60spd_S3-E6_1_7165	Pre_D7_CM	4	48	12	0.4	FALSE	0	AL9A1_HUMAN	P49189	FALSE	4_Pre_D7_CM
30	6.25152	8aug24_Sunkyung_G5-DIA_60spd_S3-F6_1_7172	Pre_D7_CM	5	48	12	0.4	FALSE	0	AL9A1_HUMAN	P49189	FALSE	5_Pre_D7_CM
1	7.15931	8aug24_Sunkyung_C2-DIA_60spd_S3-B3_1_7141	Post_D0	6	515	11	0.961538	TRUE	0	ALBU_HUMAN;cRAP-ALBU_HUMAN	P02768;cRAP-P02768	FALSE	6_Post_D0
2	10.2934	8aug24_Sunkyung_D2-DIA_60spd_S3-C3_1_7148	Post_D0	7	515	274	0.041958	FALSE	0	ALBU_HUMAN;cRAP-ALBU_HUMAN	P02768;cRAP-P02768	FALSE	7_Post_D0
3	5.8218	8aug24_Sunkyung_E2-DIA_60spd_S3-D3_1_7155	Post_D0	8	515	11	0.961538	TRUE	0	ALBU_HUMAN;cRAP-ALBU_HUMAN	P02768;cRAP-P02768	FALSE	8_Post_D0
5	7.34994	8aug24_Sunkyung_G2-DIA_60spd_S3-F3_1_7169	Post_D0	10	515	219	0.234266	FALSE	0	ALBU_HUMAN;cRAP-ALBU_HUMAN	P02768;cRAP-P02768	FALSE	10_Post_D0
6	5.81592	8aug24_Sunkyung_C4-DIA_60spd_S3-B5_1_7143	Post_D7_CC	6	391	45	0.842657	TRUE	0	ALBU_HUMAN;cRAP-ALBU_HUMAN	P02768;cRAP-P02768	FALSE	6_Post_D7_CC
7	7.31754	8aug24_Sunkyung_D4-DIA_60spd_S3-C5_1_7150	Post_D7_CC	7	391	147	0.486014	FALSE	0	ALBU_HUMAN;cRAP-ALBU_HUMAN	P02768;cRAP-P02768	FALSE	7_Post_D7_CC
8	6.48401	8aug24_Sunkyung_E4-DIA_60spd_S3-D5_1_7157	Post_D7_CC	8	391	111	0.611888	TRUE	0	ALBU_HUMAN;cRAP-ALBU_HUMAN	P02768;cRAP-P02768	FALSE	8_Post_D7_CC
9	6.54403	8aug24_Sunkyung_F4-DIA_60spd_S3-E5_1_7164	Post_D7_CC	9	391	64	0.776224	TRUE	0	ALBU_HUMAN;cRAP-ALBU_HUMAN	P02768;cRAP-P02768	FALSE	9_Post_D7_CC
10	5.4756	8aug24_Sunkyung_G4-DIA_60spd_S3-F5_1_7171	Post_D7_CC	10	391	24	0.916084	TRUE	0	ALBU_HUMAN;cRAP-ALBU_HUMAN	P02768;cRAP-P02768	FALSE	10_Post_D7_CC
11	6.46166	8aug24_Sunkyung_C6-DIA_60spd_S3-B7_1_7145	Post_D7_CM	6	585	111	0.611888	TRUE	0	ALBU_HUMAN;cRAP-ALBU_HUMAN	P02768;cRAP-P02768	FALSE	6_Post_D7_CM
12	6.35384	8aug24_Sunkyung_D6-DIA_60spd_S3-C7_1_7152	Post_D7_CM	7	585	170	0.405594	FALSE	0	ALBU_HUMAN;cRAP-ALBU_HUMAN	P02768;cRAP-P02768	FALSE	7_Post_D7_CM
13	7.28377	8aug24_Sunkyung_E6-DIA_60spd_S3-D7_1_7159	Post_D7_CM	8	585	192	0.328671	FALSE	0	ALBU_HUMAN;cRAP-ALBU_HUMAN	P02768;cRAP-P02768	FALSE	8_Post_D7_CM
14	5.9849	8aug24_Sunkyung_F6-DIA_60spd_S3-E7_1_7166	Post_D7_CM	9	585	80	0.72028	TRUE	0	ALBU_HUMAN;cRAP-ALBU_HUMAN	P02768;cRAP-P02768	FALSE	9_Post_D7_CM
15	6.16505	8aug24_Sunkyung_G6-DIA_60spd_S3-F7_1_7173	Post_D7_CM	10	585	32	0.888112	TRUE	0	ALBU_HUMAN;cRAP-ALBU_HUMAN	P02768;cRAP-P02768	FALSE	10_Post_D7_CM
16	6.48167	8aug24_Sunkyung_C1b-DIA_60spd_S3-B2_1_7140	Pre_D0	1	516	21	0.926573	TRUE	0	ALBU_HUMAN;cRAP-ALBU_HUMAN	P02768;cRAP-P02768	FALSE	1_Pre_D0
17	8.67559	8aug24_Sunkyung_D1-DIA_60spd_S3-C2_1_7147	Pre_D0	2	516	279	0.0244755	FALSE	0	ALBU_HUMAN;cRAP-ALBU_HUMAN	P02768;cRAP-P02768	FALSE	2_Pre_D0
18	6.44523	8aug24_Sunkyung_E1-DIA_60spd_S3-D2_1_7154	Pre_D0	3	516	52	0.818182	TRUE	0	ALBU_HUMAN;cRAP-ALBU_HUMAN	P02768;cRAP-P02768	FALSE	3_Pre_D0
19	7.32101	8aug24_Sunkyung_F1-DIA_60spd_S3-E2_1_7161	Pre_D0	4	516	121	0.576923	TRUE	0	ALBU_HUMAN;cRAP-ALBU_HUMAN	P02768;cRAP-P02768	FALSE	4_Pre_D0
20	5.80888	8aug24_Sunkyung_G1-DIA_60spd_S3-F2_1_7168	Pre_D0	5	516	43	0.84965	TRUE	0	ALBU_HUMAN;cRAP-ALBU_HUMAN	P02768;cRAP-P02768	FALSE	5_Pre_D0
21	6.65712	8aug24_Sunkyung_C3-DIA_60spd_S3-B4_1_7142	Pre_D7_CC	1	482	99	0.653846	TRUE	0	ALBU_HUMAN;cRAP-ALBU_HUMAN	P02768;cRAP-P02768	FALSE	1_Pre_D7_CC
22	7.9295	8aug24_Sunkyung_D3-DIA_60spd_S3-C4_1_7149	Pre_D7_CC	2	482	258	0.0979021	FALSE	0	ALBU_HUMAN;cRAP-ALBU_HUMAN	P02768;cRAP-P02768	FALSE	2_Pre_D7_CC
23	6.59951	8aug24_Sunkyung_E3-DIA_60spd_S3-D4_1_7156	Pre_D7_CC	3	482	36	0.874126	TRUE	0	ALBU_HUMAN;cRAP-ALBU_HUMAN	P02768;cRAP-P02768	FALSE	3_Pre_D7_CC
24	6.09057	8aug24_Sunkyung_F3-DIA_60spd_S3-E4_1_7163	Pre_D7_CC	4	482	45	0.842657	TRUE	0	ALBU_HUMAN;cRAP-ALBU_HUMAN	P02768;cRAP-P02768	FALSE	4_Pre_D7_CC
25	8.28981	8aug24_Sunkyung_G3-DIA_60spd_S3-F4_1_7170	Pre_D7_CC	5	482	44	0.846154	TRUE	0	ALBU_HUMAN;cRAP-ALBU_HUMAN	P02768;cRAP-P02768	FALSE	5_Pre_D7_CC
26	10.7495	8aug24_Sunkyung_C5-DIA_60spd_S3-B6_1_7144	Pre_D7_CM	1	543	274	0.041958	FALSE	0	ALBU_HUMAN;cRAP-ALBU_HUMAN	P02768;cRAP-P02768	FALSE	1_Pre_D7_CM
27	8.27642	8aug24_Sunkyung_D5-DIA_60spd_S3-C6_1_7151	Pre_D7_CM	2	543	179	0.374126	FALSE	0	ALBU_HUMAN;cRAP-ALBU_HUMAN	P02768;cRAP-P02768	FALSE	2_Pre_D7_CM
28	6.23631	8aug24_Sunkyung_E5-DIA_60spd_S3-D6_1_7158	Pre_D7_CM	3	543	57	0.800699	TRUE	0	ALBU_HUMAN;cRAP-ALBU_HUMAN	P02768;cRAP-P02768	FALSE	3_Pre_D7_CM
29	6.17596	8aug24_Sunkyung_F5-DIA_60spd_S3-E6_1_7165	Pre_D7_CM	4	543	21	0.926573	TRUE	0	ALBU_HUMAN;cRAP-ALBU_HUMAN	P02768;cRAP-P02768	FALSE	4_Pre_D7_CM
30	7.73004	8aug24_Sunkyung_G5-DIA_60spd_S3-F6_1_7172	Pre_D7_CM	5	543	12	0.958042	TRUE	0	ALBU_HUMAN;cRAP-ALBU_HUMAN	P02768;cRAP-P02768	FALSE	5_Pre_D7_CM
1	6.63403	8aug24_Sunkyung_C2-DIA_60spd_S3-B3_1_7141	Post_D0	6	579	57	0.636943	TRUE	0	ALDOA_HUMAN	P04075	FALSE	6_Post_D0
2	7.7529	8aug24_Sunkyung_D2-DIA_60spd_S3-C3_1_7148	Post_D0	7	579	105	0.33121	FALSE	0	ALDOA_HUMAN	P04075	FALSE	7_Post_D0
3	8.26654	8aug24_Sunkyung_E2-DIA_60spd_S3-D3_1_7155	Post_D0	8	579	156	0.00636943	FALSE	0	ALDOA_HUMAN	P04075	FALSE	8_Post_D0
4	8.33006	8aug24_Sunkyung_F2-DIA_60spd_S3-E3_1_7162	Post_D0	9	579	156	0.00636943	FALSE	0	ALDOA_HUMAN	P04075	FALSE	9_Post_D0
5	7.25337	8aug24_Sunkyung_G2-DIA_60spd_S3-F3_1_7169	Post_D0	10	579	105	0.33121	FALSE	0	ALDOA_HUMAN	P04075	FALSE	10_Post_D0
6	6.93763	8aug24_Sunkyung_C4-DIA_60spd_S3-B5_1_7143	Post_D7_CC	6	580	102	0.350318	FALSE	0	ALDOA_HUMAN	P04075	FALSE	6_Post_D7_CC
7	7.42003	8aug24_Sunkyung_D4-DIA_60spd_S3-C5_1_7150	Post_D7_CC	7	580	105	0.33121	FALSE	0	ALDOA_HUMAN	P04075	FALSE	7_Post_D7_CC
8	7.16772	8aug24_Sunkyung_E4-DIA_60spd_S3-D5_1_7157	Post_D7_CC	8	580	117	0.254777	FALSE	0	ALDOA_HUMAN	P04075	FALSE	8_Post_D7_CC
9	7.65292	8aug24_Sunkyung_F4-DIA_60spd_S3-E5_1_7164	Post_D7_CC	9	580	118	0.248408	FALSE	0	ALDOA_HUMAN	P04075	FALSE	9_Post_D7_CC
10	7.64423	8aug24_Sunkyung_G4-DIA_60spd_S3-F5_1_7171	Post_D7_CC	10	580	138	0.121019	FALSE	0	ALDOA_HUMAN	P04075	FALSE	10_Post_D7_CC
11	6.47167	8aug24_Sunkyung_C6-DIA_60spd_S3-B7_1_7145	Post_D7_CM	6	634	69	0.56051	TRUE	0	ALDOA_HUMAN	P04075	FALSE	6_Post_D7_CM
12	9.45651	8aug24_Sunkyung_D6-DIA_60spd_S3-C7_1_7152	Post_D7_CM	7	634	157	0	FALSE	0	ALDOA_HUMAN	P04075	FALSE	7_Post_D7_CM
13	8.47287	8aug24_Sunkyung_E6-DIA_60spd_S3-D7_1_7159	Post_D7_CM	8	634	141	0.101911	FALSE	0	ALDOA_HUMAN	P04075	FALSE	8_Post_D7_CM
14	8.69185	8aug24_Sunkyung_F6-DIA_60spd_S3-E7_1_7166	Post_D7_CM	9	634	150	0.044586	FALSE	0	ALDOA_HUMAN	P04075	FALSE	9_Post_D7_CM
15	8.44448	8aug24_Sunkyung_G6-DIA_60spd_S3-F7_1_7173	Post_D7_CM	10	634	117	0.254777	FALSE	0	ALDOA_HUMAN	P04075	FALSE	10_Post_D7_CM
16	7.54318	8aug24_Sunkyung_C1b-DIA_60spd_S3-B2_1_7140	Pre_D0	1	651	129	0.178344	FALSE	0	ALDOA_HUMAN	P04075	FALSE	1_Pre_D0
17	7.60299	8aug24_Sunkyung_D1-DIA_60spd_S3-C2_1_7147	Pre_D0	2	651	138	0.121019	FALSE	0	ALDOA_HUMAN	P04075	FALSE	2_Pre_D0
18	7.65597	8aug24_Sunkyung_E1-DIA_60spd_S3-D2_1_7154	Pre_D0	3	651	138	0.121019	FALSE	0	ALDOA_HUMAN	P04075	FALSE	3_Pre_D0
19	7.65635	8aug24_Sunkyung_F1-DIA_60spd_S3-E2_1_7161	Pre_D0	4	651	102	0.350318	FALSE	0	ALDOA_HUMAN	P04075	FALSE	4_Pre_D0
20	9.0043	8aug24_Sunkyung_G1-DIA_60spd_S3-F2_1_7168	Pre_D0	5	651	144	0.0828025	FALSE	0	ALDOA_HUMAN	P04075	FALSE	5_Pre_D0
21	7.26769	8aug24_Sunkyung_C3-DIA_60spd_S3-B4_1_7142	Pre_D7_CC	1	621	138	0.121019	FALSE	0	ALDOA_HUMAN	P04075	FALSE	1_Pre_D7_CC
22	7.43727	8aug24_Sunkyung_D3-DIA_60spd_S3-C4_1_7149	Pre_D7_CC	2	621	114	0.273885	FALSE	0	ALDOA_HUMAN	P04075	FALSE	2_Pre_D7_CC
23	7.08135	8aug24_Sunkyung_E3-DIA_60spd_S3-D4_1_7156	Pre_D7_CC	3	621	114	0.273885	FALSE	0	ALDOA_HUMAN	P04075	FALSE	3_Pre_D7_CC
24	8.03155	8aug24_Sunkyung_F3-DIA_60spd_S3-E4_1_7163	Pre_D7_CC	4	621	138	0.121019	FALSE	0	ALDOA_HUMAN	P04075	FALSE	4_Pre_D7_CC
25	7.29176	8aug24_Sunkyung_G3-DIA_60spd_S3-F4_1_7170	Pre_D7_CC	5	621	117	0.254777	FALSE	0	ALDOA_HUMAN	P04075	FALSE	5_Pre_D7_CC
26	6.75954	8aug24_Sunkyung_C5-DIA_60spd_S3-B6_1_7144	Pre_D7_CM	1	598	102	0.350318	FALSE	0	ALDOA_HUMAN	P04075	FALSE	1_Pre_D7_CM
27	7.31536	8aug24_Sunkyung_D5-DIA_60spd_S3-C6_1_7151	Pre_D7_CM	2	598	93	0.407643	FALSE	0	ALDOA_HUMAN	P04075	FALSE	2_Pre_D7_CM
28	8.45514	8aug24_Sunkyung_E5-DIA_60spd_S3-D6_1_7158	Pre_D7_CM	3	598	138	0.121019	FALSE	0	ALDOA_HUMAN	P04075	FALSE	3_Pre_D7_CM
29	8.8844	8aug24_Sunkyung_F5-DIA_60spd_S3-E6_1_7165	Pre_D7_CM	4	598	138	0.121019	FALSE	0	ALDOA_HUMAN	P04075	FALSE	4_Pre_D7_CM
30	8.62619	8aug24_Sunkyung_G5-DIA_60spd_S3-F6_1_7172	Pre_D7_CM	5	598	127	0.191083	FALSE	0	ALDOA_HUMAN	P04075	FALSE	5_Pre_D7_CM
2	6.59188	8aug24_Sunkyung_D2-DIA_60spd_S3-C3_1_7148	Post_D0	7	73	9	0.709677	TRUE	0	ALDR_HUMAN	P15121	FALSE	7_Post_D0
3	7.23569	8aug24_Sunkyung_E2-DIA_60spd_S3-D3_1_7155	Post_D0	8	73	31	0	FALSE	0	ALDR_HUMAN	P15121	FALSE	8_Post_D0
4	7.07337	8aug24_Sunkyung_F2-DIA_60spd_S3-E3_1_7162	Post_D0	9	73	21	0.322581	FALSE	0	ALDR_HUMAN	P15121	FALSE	9_Post_D0
5	6.54339	8aug24_Sunkyung_G2-DIA_60spd_S3-F3_1_7169	Post_D0	10	73	12	0.612903	TRUE	0	ALDR_HUMAN	P15121	FALSE	10_Post_D0
6	6.8939	8aug24_Sunkyung_C4-DIA_60spd_S3-B5_1_7143	Post_D7_CC	6	58	9	0.709677	TRUE	0	ALDR_HUMAN	P15121	FALSE	6_Post_D7_CC
7	6.8939	8aug24_Sunkyung_D4-DIA_60spd_S3-C5_1_7150	Post_D7_CC	7	58	9	0.709677	TRUE	0	ALDR_HUMAN	P15121	FALSE	7_Post_D7_CC
9	6.8939	8aug24_Sunkyung_F4-DIA_60spd_S3-E5_1_7164	Post_D7_CC	9	58	9	0.709677	TRUE	0	ALDR_HUMAN	P15121	FALSE	9_Post_D7_CC
10	6.71287	8aug24_Sunkyung_G4-DIA_60spd_S3-F5_1_7171	Post_D7_CC	10	58	31	0	FALSE	0	ALDR_HUMAN	P15121	FALSE	10_Post_D7_CC
12	6.71075	8aug24_Sunkyung_D6-DIA_60spd_S3-C7_1_7152	Post_D7_CM	7	70	9	0.709677	TRUE	0	ALDR_HUMAN	P15121	FALSE	7_Post_D7_CM
13	6.8939	8aug24_Sunkyung_E6-DIA_60spd_S3-D7_1_7159	Post_D7_CM	8	70	21	0.322581	FALSE	0	ALDR_HUMAN	P15121	FALSE	8_Post_D7_CM
14	7.1963	8aug24_Sunkyung_F6-DIA_60spd_S3-E7_1_7166	Post_D7_CM	9	70	31	0	FALSE	0	ALDR_HUMAN	P15121	FALSE	9_Post_D7_CM
15	7.0949	8aug24_Sunkyung_G6-DIA_60spd_S3-F7_1_7173	Post_D7_CM	10	70	9	0.709677	TRUE	0	ALDR_HUMAN	P15121	FALSE	10_Post_D7_CM
16	6.9333	8aug24_Sunkyung_C1b-DIA_60spd_S3-B2_1_7140	Pre_D0	1	82	21	0.322581	FALSE	0	ALDR_HUMAN	P15121	FALSE	1_Pre_D0
17	6.74682	8aug24_Sunkyung_D1-DIA_60spd_S3-C2_1_7147	Pre_D0	2	82	21	0.322581	FALSE	0	ALDR_HUMAN	P15121	FALSE	2_Pre_D0
18	6.94156	8aug24_Sunkyung_E1-DIA_60spd_S3-D2_1_7154	Pre_D0	3	82	9	0.709677	TRUE	0	ALDR_HUMAN	P15121	FALSE	3_Pre_D0
20	7.92977	8aug24_Sunkyung_G1-DIA_60spd_S3-F2_1_7168	Pre_D0	5	82	31	0	FALSE	0	ALDR_HUMAN	P15121	FALSE	5_Pre_D0
21	6.8939	8aug24_Sunkyung_C3-DIA_60spd_S3-B4_1_7142	Pre_D7_CC	1	48	9	0.709677	TRUE	0	ALDR_HUMAN	P15121	FALSE	1_Pre_D7_CC
22	6.8939	8aug24_Sunkyung_D3-DIA_60spd_S3-C4_1_7149	Pre_D7_CC	2	48	9	0.709677	TRUE	0	ALDR_HUMAN	P15121	FALSE	2_Pre_D7_CC
24	6.8939	8aug24_Sunkyung_F3-DIA_60spd_S3-E4_1_7163	Pre_D7_CC	4	48	9	0.709677	TRUE	0	ALDR_HUMAN	P15121	FALSE	4_Pre_D7_CC
25	6.20996	8aug24_Sunkyung_G3-DIA_60spd_S3-F4_1_7170	Pre_D7_CC	5	48	21	0.322581	FALSE	0	ALDR_HUMAN	P15121	FALSE	5_Pre_D7_CC
27	6.42145	8aug24_Sunkyung_D5-DIA_60spd_S3-C6_1_7151	Pre_D7_CM	2	80	9	0.709677	TRUE	0	ALDR_HUMAN	P15121	FALSE	2_Pre_D7_CM
28	7.33285	8aug24_Sunkyung_E5-DIA_60spd_S3-D6_1_7158	Pre_D7_CM	3	80	9	0.709677	TRUE	0	ALDR_HUMAN	P15121	FALSE	3_Pre_D7_CM
29	7.69687	8aug24_Sunkyung_F5-DIA_60spd_S3-E6_1_7165	Pre_D7_CM	4	80	31	0	FALSE	0	ALDR_HUMAN	P15121	FALSE	4_Pre_D7_CM
30	7.57184	8aug24_Sunkyung_G5-DIA_60spd_S3-F6_1_7172	Pre_D7_CM	5	80	31	0	FALSE	0	ALDR_HUMAN	P15121	FALSE	5_Pre_D7_CM
2	7.49138	8aug24_Sunkyung_D2-DIA_60spd_S3-C3_1_7148	Post_D0	7	120	46	0	FALSE	0	AMPB_HUMAN	Q9H4A4	FALSE	7_Post_D0
3	7.04385	8aug24_Sunkyung_E2-DIA_60spd_S3-D3_1_7155	Post_D0	8	120	35	0.23913	FALSE	0	AMPB_HUMAN	Q9H4A4	FALSE	8_Post_D0
4	6.83835	8aug24_Sunkyung_F2-DIA_60spd_S3-E3_1_7162	Post_D0	9	120	34	0.26087	FALSE	0	AMPB_HUMAN	Q9H4A4	FALSE	9_Post_D0
5	7.73236	8aug24_Sunkyung_G2-DIA_60spd_S3-F3_1_7169	Post_D0	10	120	5	0.891304	TRUE	0	AMPB_HUMAN	Q9H4A4	FALSE	10_Post_D0
7	6.81787	8aug24_Sunkyung_D4-DIA_60spd_S3-C5_1_7150	Post_D7_CC	7	47	18	0.608696	TRUE	0	AMPB_HUMAN	Q9H4A4	FALSE	7_Post_D7_CC
8	7.33835	8aug24_Sunkyung_E4-DIA_60spd_S3-D5_1_7157	Post_D7_CC	8	47	12	0.73913	TRUE	0	AMPB_HUMAN	Q9H4A4	FALSE	8_Post_D7_CC
9	6.83548	8aug24_Sunkyung_F4-DIA_60spd_S3-E5_1_7164	Post_D7_CC	9	47	17	0.630435	TRUE	0	AMPB_HUMAN	Q9H4A4	FALSE	9_Post_D7_CC
12	7.56243	8aug24_Sunkyung_D6-DIA_60spd_S3-C7_1_7152	Post_D7_CM	7	155	46	0	FALSE	0	AMPB_HUMAN	Q9H4A4	FALSE	7_Post_D7_CM
13	7.38553	8aug24_Sunkyung_E6-DIA_60spd_S3-D7_1_7159	Post_D7_CM	8	155	28	0.391304	FALSE	0	AMPB_HUMAN	Q9H4A4	FALSE	8_Post_D7_CM
14	7.3928	8aug24_Sunkyung_F6-DIA_60spd_S3-E7_1_7166	Post_D7_CM	9	155	35	0.23913	FALSE	0	AMPB_HUMAN	Q9H4A4	FALSE	9_Post_D7_CM
15	6.83421	8aug24_Sunkyung_G6-DIA_60spd_S3-F7_1_7173	Post_D7_CM	10	155	46	0	FALSE	0	AMPB_HUMAN	Q9H4A4	FALSE	10_Post_D7_CM
16	7.48295	8aug24_Sunkyung_C1b-DIA_60spd_S3-B2_1_7140	Pre_D0	1	140	24	0.478261	FALSE	0	AMPB_HUMAN	Q9H4A4	FALSE	1_Pre_D0
17	7.34616	8aug24_Sunkyung_D1-DIA_60spd_S3-C2_1_7147	Pre_D0	2	140	41	0.108696	FALSE	0	AMPB_HUMAN	Q9H4A4	FALSE	2_Pre_D0
18	7.16692	8aug24_Sunkyung_E1-DIA_60spd_S3-D2_1_7154	Pre_D0	3	140	34	0.26087	FALSE	0	AMPB_HUMAN	Q9H4A4	FALSE	3_Pre_D0
20	7.15648	8aug24_Sunkyung_G1-DIA_60spd_S3-F2_1_7168	Pre_D0	5	140	41	0.108696	FALSE	0	AMPB_HUMAN	Q9H4A4	FALSE	5_Pre_D0
21	6.33827	8aug24_Sunkyung_C3-DIA_60spd_S3-B4_1_7142	Pre_D7_CC	1	63	11	0.76087	TRUE	0	AMPB_HUMAN	Q9H4A4	FALSE	1_Pre_D7_CC
22	6.54984	8aug24_Sunkyung_D3-DIA_60spd_S3-C4_1_7149	Pre_D7_CC	2	63	11	0.76087	TRUE	0	AMPB_HUMAN	Q9H4A4	FALSE	2_Pre_D7_CC
23	6.74671	8aug24_Sunkyung_E3-DIA_60spd_S3-D4_1_7156	Pre_D7_CC	3	63	6	0.869565	TRUE	0	AMPB_HUMAN	Q9H4A4	FALSE	3_Pre_D7_CC
24	7.04261	8aug24_Sunkyung_F3-DIA_60spd_S3-E4_1_7163	Pre_D7_CC	4	63	35	0.23913	FALSE	0	AMPB_HUMAN	Q9H4A4	FALSE	4_Pre_D7_CC
26	6.33827	8aug24_Sunkyung_C5-DIA_60spd_S3-B6_1_7144	Pre_D7_CM	1	68	11	0.76087	TRUE	0	AMPB_HUMAN	Q9H4A4	FALSE	1_Pre_D7_CM
28	6.51705	8aug24_Sunkyung_E5-DIA_60spd_S3-D6_1_7158	Pre_D7_CM	3	68	16	0.652174	TRUE	0	AMPB_HUMAN	Q9H4A4	FALSE	3_Pre_D7_CM
29	7.51321	8aug24_Sunkyung_F5-DIA_60spd_S3-E6_1_7165	Pre_D7_CM	4	68	12	0.73913	TRUE	0	AMPB_HUMAN	Q9H4A4	FALSE	4_Pre_D7_CM
30	6.85514	8aug24_Sunkyung_G5-DIA_60spd_S3-F6_1_7172	Pre_D7_CM	5	68	29	0.369565	FALSE	0	AMPB_HUMAN	Q9H4A4	FALSE	5_Pre_D7_CM
2	6.70577	8aug24_Sunkyung_D2-DIA_60spd_S3-C3_1_7148	Post_D0	7	104	20	0.52381	TRUE	0	AN32A_HUMAN	P39687	FALSE	7_Post_D0
3	7.98029	8aug24_Sunkyung_E2-DIA_60spd_S3-D3_1_7155	Post_D0	8	104	42	0	FALSE	0	AN32A_HUMAN	P39687	FALSE	8_Post_D0
4	7.94885	8aug24_Sunkyung_F2-DIA_60spd_S3-E3_1_7162	Post_D0	9	104	42	0	FALSE	0	AN32A_HUMAN	P39687	FALSE	9_Post_D0
6	7.01934	8aug24_Sunkyung_C4-DIA_60spd_S3-B5_1_7143	Post_D7_CC	6	68	20	0.52381	TRUE	0	AN32A_HUMAN	P39687	FALSE	6_Post_D7_CC
7	6.97522	8aug24_Sunkyung_D4-DIA_60spd_S3-C5_1_7150	Post_D7_CC	7	68	8	0.809524	TRUE	0	AN32A_HUMAN	P39687	FALSE	7_Post_D7_CC
8	7.08719	8aug24_Sunkyung_E4-DIA_60spd_S3-D5_1_7157	Post_D7_CC	8	68	8	0.809524	TRUE	0	AN32A_HUMAN	P39687	FALSE	8_Post_D7_CC
9	6.5783	8aug24_Sunkyung_F4-DIA_60spd_S3-E5_1_7164	Post_D7_CC	9	68	12	0.714286	TRUE	0	AN32A_HUMAN	P39687	FALSE	9_Post_D7_CC
10	7.0655	8aug24_Sunkyung_G4-DIA_60spd_S3-F5_1_7171	Post_D7_CC	10	68	20	0.52381	TRUE	0	AN32A_HUMAN	P39687	FALSE	10_Post_D7_CC
12	7.05514	8aug24_Sunkyung_D6-DIA_60spd_S3-C7_1_7152	Post_D7_CM	7	93	8	0.809524	TRUE	0	AN32A_HUMAN	P39687	FALSE	7_Post_D7_CM
13	7.14656	8aug24_Sunkyung_E6-DIA_60spd_S3-D7_1_7159	Post_D7_CM	8	93	42	0	FALSE	0	AN32A_HUMAN	P39687	FALSE	8_Post_D7_CM
14	7.71589	8aug24_Sunkyung_F6-DIA_60spd_S3-E7_1_7166	Post_D7_CM	9	93	31	0.261905	FALSE	0	AN32A_HUMAN	P39687	FALSE	9_Post_D7_CM
15	5.66223	8aug24_Sunkyung_G6-DIA_60spd_S3-F7_1_7173	Post_D7_CM	10	93	12	0.714286	TRUE	0	AN32A_HUMAN	P39687	FALSE	10_Post_D7_CM
16	7.95127	8aug24_Sunkyung_C1b-DIA_60spd_S3-B2_1_7140	Pre_D0	1	123	30	0.285714	FALSE	0	AN32A_HUMAN	P39687	FALSE	1_Pre_D0
17	6.8518	8aug24_Sunkyung_D1-DIA_60spd_S3-C2_1_7147	Pre_D0	2	123	12	0.714286	TRUE	0	AN32A_HUMAN	P39687	FALSE	2_Pre_D0
18	7.16205	8aug24_Sunkyung_E1-DIA_60spd_S3-D2_1_7154	Pre_D0	3	123	20	0.52381	TRUE	0	AN32A_HUMAN	P39687	FALSE	3_Pre_D0
19	6.96084	8aug24_Sunkyung_F1-DIA_60spd_S3-E2_1_7161	Pre_D0	4	123	19	0.547619	TRUE	0	AN32A_HUMAN	P39687	FALSE	4_Pre_D0
20	8.52759	8aug24_Sunkyung_G1-DIA_60spd_S3-F2_1_7168	Pre_D0	5	123	42	0	FALSE	0	AN32A_HUMAN	P39687	FALSE	5_Pre_D0
21	6.84698	8aug24_Sunkyung_C3-DIA_60spd_S3-B4_1_7142	Pre_D7_CC	1	85	31	0.261905	FALSE	0	AN32A_HUMAN	P39687	FALSE	1_Pre_D7_CC
22	7.10792	8aug24_Sunkyung_D3-DIA_60spd_S3-C4_1_7149	Pre_D7_CC	2	85	31	0.261905	FALSE	0	AN32A_HUMAN	P39687	FALSE	2_Pre_D7_CC
23	6.1599	8aug24_Sunkyung_E3-DIA_60spd_S3-D4_1_7156	Pre_D7_CC	3	85	12	0.714286	TRUE	0	AN32A_HUMAN	P39687	FALSE	3_Pre_D7_CC
24	5.78834	8aug24_Sunkyung_F3-DIA_60spd_S3-E4_1_7163	Pre_D7_CC	4	85	11	0.738095	TRUE	0	AN32A_HUMAN	P39687	FALSE	4_Pre_D7_CC
26	6.60393	8aug24_Sunkyung_C5-DIA_60spd_S3-B6_1_7144	Pre_D7_CM	1	109	12	0.714286	TRUE	0	AN32A_HUMAN	P39687	FALSE	1_Pre_D7_CM
27	6.6057	8aug24_Sunkyung_D5-DIA_60spd_S3-C6_1_7151	Pre_D7_CM	2	109	12	0.714286	TRUE	0	AN32A_HUMAN	P39687	FALSE	2_Pre_D7_CM
28	5.60346	8aug24_Sunkyung_E5-DIA_60spd_S3-D6_1_7158	Pre_D7_CM	3	109	12	0.714286	TRUE	0	AN32A_HUMAN	P39687	FALSE	3_Pre_D7_CM
29	7.55381	8aug24_Sunkyung_F5-DIA_60spd_S3-E6_1_7165	Pre_D7_CM	4	109	31	0.261905	FALSE	0	AN32A_HUMAN	P39687	FALSE	4_Pre_D7_CM
30	7.49837	8aug24_Sunkyung_G5-DIA_60spd_S3-F6_1_7172	Pre_D7_CM	5	109	42	0	FALSE	0	AN32A_HUMAN	P39687	FALSE	5_Pre_D7_CM
3	8.25653	8aug24_Sunkyung_E2-DIA_60spd_S3-D3_1_7155	Post_D0	8	60	27	0	FALSE	0	AN32B_HUMAN	Q92688	FALSE	8_Post_D0
4	8.14216	8aug24_Sunkyung_F2-DIA_60spd_S3-E3_1_7162	Post_D0	9	60	22	0.185185	FALSE	0	AN32B_HUMAN	Q92688	FALSE	9_Post_D0
5	3.79833	8aug24_Sunkyung_G2-DIA_60spd_S3-F3_1_7169	Post_D0	10	60	11	0.592593	TRUE	0	AN32B_HUMAN	Q92688	FALSE	10_Post_D0
6	3.79833	8aug24_Sunkyung_C4-DIA_60spd_S3-B5_1_7143	Post_D7_CC	6	44	11	0.592593	TRUE	0	AN32B_HUMAN	Q92688	FALSE	6_Post_D7_CC
9	3.79833	8aug24_Sunkyung_F4-DIA_60spd_S3-E5_1_7164	Post_D7_CC	9	44	11	0.592593	TRUE	0	AN32B_HUMAN	Q92688	FALSE	9_Post_D7_CC
10	5.15151	8aug24_Sunkyung_G4-DIA_60spd_S3-F5_1_7171	Post_D7_CC	10	44	22	0.185185	FALSE	0	AN32B_HUMAN	Q92688	FALSE	10_Post_D7_CC
12	5.35282	8aug24_Sunkyung_D6-DIA_60spd_S3-C7_1_7152	Post_D7_CM	7	71	11	0.592593	TRUE	0	AN32B_HUMAN	Q92688	FALSE	7_Post_D7_CM
13	5.55029	8aug24_Sunkyung_E6-DIA_60spd_S3-D7_1_7159	Post_D7_CM	8	71	22	0.185185	FALSE	0	AN32B_HUMAN	Q92688	FALSE	8_Post_D7_CM
14	7.7592	8aug24_Sunkyung_F6-DIA_60spd_S3-E7_1_7166	Post_D7_CM	9	71	27	0	FALSE	0	AN32B_HUMAN	Q92688	FALSE	9_Post_D7_CM
15	6.40854	8aug24_Sunkyung_G6-DIA_60spd_S3-F7_1_7173	Post_D7_CM	10	71	11	0.592593	TRUE	0	AN32B_HUMAN	Q92688	FALSE	10_Post_D7_CM
16	7.18349	8aug24_Sunkyung_C1b-DIA_60spd_S3-B2_1_7140	Pre_D0	1	49	11	0.592593	TRUE	0	AN32B_HUMAN	Q92688	FALSE	1_Pre_D0
18	7.14669	8aug24_Sunkyung_E1-DIA_60spd_S3-D2_1_7154	Pre_D0	3	49	11	0.592593	TRUE	0	AN32B_HUMAN	Q92688	FALSE	3_Pre_D0
20	8.85704	8aug24_Sunkyung_G1-DIA_60spd_S3-F2_1_7168	Pre_D0	5	49	27	0	FALSE	0	AN32B_HUMAN	Q92688	FALSE	5_Pre_D0
22	7.02516	8aug24_Sunkyung_D3-DIA_60spd_S3-C4_1_7149	Pre_D7_CC	2	27	11	0.592593	TRUE	0	AN32B_HUMAN	Q92688	FALSE	2_Pre_D7_CC
25	3.89289	8aug24_Sunkyung_G3-DIA_60spd_S3-F4_1_7170	Pre_D7_CC	5	27	16	0.407407	FALSE	0	AN32B_HUMAN	Q92688	FALSE	5_Pre_D7_CC
27	3.79833	8aug24_Sunkyung_D5-DIA_60spd_S3-C6_1_7151	Pre_D7_CM	2	71	11	0.592593	TRUE	0	AN32B_HUMAN	Q92688	FALSE	2_Pre_D7_CM
28	5.5183	8aug24_Sunkyung_E5-DIA_60spd_S3-D6_1_7158	Pre_D7_CM	3	71	11	0.592593	TRUE	0	AN32B_HUMAN	Q92688	FALSE	3_Pre_D7_CM
29	7.01546	8aug24_Sunkyung_F5-DIA_60spd_S3-E6_1_7165	Pre_D7_CM	4	71	27	0	FALSE	0	AN32B_HUMAN	Q92688	FALSE	4_Pre_D7_CM
30	5.66922	8aug24_Sunkyung_G5-DIA_60spd_S3-F6_1_7172	Pre_D7_CM	5	71	22	0.185185	FALSE	0	AN32B_HUMAN	Q92688	FALSE	5_Pre_D7_CM
2	6.35162	8aug24_Sunkyung_D2-DIA_60spd_S3-C3_1_7148	Post_D0	7	158	34	0.564103	TRUE	0	ANXA1_HUMAN	P04083	FALSE	7_Post_D0
3	7.24865	8aug24_Sunkyung_E2-DIA_60spd_S3-D3_1_7155	Post_D0	8	158	68	0.128205	FALSE	0	ANXA1_HUMAN	P04083	FALSE	8_Post_D0
4	7.31178	8aug24_Sunkyung_F2-DIA_60spd_S3-E3_1_7162	Post_D0	9	158	46	0.410256	FALSE	0	ANXA1_HUMAN	P04083	FALSE	9_Post_D0
5	5.60731	8aug24_Sunkyung_G2-DIA_60spd_S3-F3_1_7169	Post_D0	10	158	10	0.871795	TRUE	0	ANXA1_HUMAN	P04083	FALSE	10_Post_D0
6	6.67885	8aug24_Sunkyung_C4-DIA_60spd_S3-B5_1_7143	Post_D7_CC	6	168	34	0.564103	TRUE	0	ANXA1_HUMAN	P04083	FALSE	6_Post_D7_CC
7	6.99611	8aug24_Sunkyung_D4-DIA_60spd_S3-C5_1_7150	Post_D7_CC	7	168	22	0.717949	TRUE	0	ANXA1_HUMAN	P04083	FALSE	7_Post_D7_CC
8	6.36032	8aug24_Sunkyung_E4-DIA_60spd_S3-D5_1_7157	Post_D7_CC	8	168	22	0.717949	TRUE	0	ANXA1_HUMAN	P04083	FALSE	8_Post_D7_CC
9	7.01009	8aug24_Sunkyung_F4-DIA_60spd_S3-E5_1_7164	Post_D7_CC	9	168	28	0.641026	TRUE	0	ANXA1_HUMAN	P04083	FALSE	9_Post_D7_CC
10	7.3803	8aug24_Sunkyung_G4-DIA_60spd_S3-F5_1_7171	Post_D7_CC	10	168	62	0.205128	FALSE	0	ANXA1_HUMAN	P04083	FALSE	10_Post_D7_CC
11	5.8782	8aug24_Sunkyung_C6-DIA_60spd_S3-B7_1_7145	Post_D7_CM	6	226	22	0.717949	TRUE	0	ANXA1_HUMAN	P04083	FALSE	6_Post_D7_CM
12	7.67114	8aug24_Sunkyung_D6-DIA_60spd_S3-C7_1_7152	Post_D7_CM	7	226	74	0.0512821	FALSE	0	ANXA1_HUMAN	P04083	FALSE	7_Post_D7_CM
13	7.03773	8aug24_Sunkyung_E6-DIA_60spd_S3-D7_1_7159	Post_D7_CM	8	226	34	0.564103	TRUE	0	ANXA1_HUMAN	P04083	FALSE	8_Post_D7_CM
14	7.4751	8aug24_Sunkyung_F6-DIA_60spd_S3-E7_1_7166	Post_D7_CM	9	226	74	0.0512821	FALSE	0	ANXA1_HUMAN	P04083	FALSE	9_Post_D7_CM
15	7.19608	8aug24_Sunkyung_G6-DIA_60spd_S3-F7_1_7173	Post_D7_CM	10	226	22	0.717949	TRUE	0	ANXA1_HUMAN	P04083	FALSE	10_Post_D7_CM
16	7.37118	8aug24_Sunkyung_C1b-DIA_60spd_S3-B2_1_7140	Pre_D0	1	216	60	0.230769	FALSE	0	ANXA1_HUMAN	P04083	FALSE	1_Pre_D0
17	8.48314	8aug24_Sunkyung_D1-DIA_60spd_S3-C2_1_7147	Pre_D0	2	216	60	0.230769	FALSE	0	ANXA1_HUMAN	P04083	FALSE	2_Pre_D0
18	6.65755	8aug24_Sunkyung_E1-DIA_60spd_S3-D2_1_7154	Pre_D0	3	216	22	0.717949	TRUE	0	ANXA1_HUMAN	P04083	FALSE	3_Pre_D0
19	7.74725	8aug24_Sunkyung_F1-DIA_60spd_S3-E2_1_7161	Pre_D0	4	216	10	0.871795	TRUE	0	ANXA1_HUMAN	P04083	FALSE	4_Pre_D0
20	7.6964	8aug24_Sunkyung_G1-DIA_60spd_S3-F2_1_7168	Pre_D0	5	216	64	0.179487	FALSE	0	ANXA1_HUMAN	P04083	FALSE	5_Pre_D0
21	6.52207	8aug24_Sunkyung_C3-DIA_60spd_S3-B4_1_7142	Pre_D7_CC	1	182	46	0.410256	FALSE	0	ANXA1_HUMAN	P04083	FALSE	1_Pre_D7_CC
22	6.71504	8aug24_Sunkyung_D3-DIA_60spd_S3-C4_1_7149	Pre_D7_CC	2	182	34	0.564103	TRUE	0	ANXA1_HUMAN	P04083	FALSE	2_Pre_D7_CC
23	6.40608	8aug24_Sunkyung_E3-DIA_60spd_S3-D4_1_7156	Pre_D7_CC	3	182	12	0.846154	TRUE	0	ANXA1_HUMAN	P04083	FALSE	3_Pre_D7_CC
24	6.91471	8aug24_Sunkyung_F3-DIA_60spd_S3-E4_1_7163	Pre_D7_CC	4	182	56	0.282051	FALSE	0	ANXA1_HUMAN	P04083	FALSE	4_Pre_D7_CC
25	6.65943	8aug24_Sunkyung_G3-DIA_60spd_S3-F4_1_7170	Pre_D7_CC	5	182	34	0.564103	TRUE	0	ANXA1_HUMAN	P04083	FALSE	5_Pre_D7_CC
26	6.84692	8aug24_Sunkyung_C5-DIA_60spd_S3-B6_1_7144	Pre_D7_CM	1	158	22	0.717949	TRUE	0	ANXA1_HUMAN	P04083	FALSE	1_Pre_D7_CM
28	6.43481	8aug24_Sunkyung_E5-DIA_60spd_S3-D6_1_7158	Pre_D7_CM	3	158	34	0.564103	TRUE	0	ANXA1_HUMAN	P04083	FALSE	3_Pre_D7_CM
29	7.53565	8aug24_Sunkyung_F5-DIA_60spd_S3-E6_1_7165	Pre_D7_CM	4	158	56	0.282051	FALSE	0	ANXA1_HUMAN	P04083	FALSE	4_Pre_D7_CM
30	7.08847	8aug24_Sunkyung_G5-DIA_60spd_S3-F6_1_7172	Pre_D7_CM	5	158	46	0.410256	FALSE	0	ANXA1_HUMAN	P04083	FALSE	5_Pre_D7_CM
1	7.48362	8aug24_Sunkyung_C2-DIA_60spd_S3-B3_1_7141	Post_D0	6	452	44	0.748571	TRUE	0	ANXA2_HUMAN	P07355	FALSE	6_Post_D0
2	7.44688	8aug24_Sunkyung_D2-DIA_60spd_S3-C3_1_7148	Post_D0	7	452	82	0.531429	TRUE	0	ANXA2_HUMAN	P07355	FALSE	7_Post_D0
3	8.347	8aug24_Sunkyung_E2-DIA_60spd_S3-D3_1_7155	Post_D0	8	452	143	0.182857	FALSE	0	ANXA2_HUMAN	P07355	FALSE	8_Post_D0
4	7.84637	8aug24_Sunkyung_F2-DIA_60spd_S3-E3_1_7162	Post_D0	9	452	116	0.337143	FALSE	0	ANXA2_HUMAN	P07355	FALSE	9_Post_D0
5	7.68524	8aug24_Sunkyung_G2-DIA_60spd_S3-F3_1_7169	Post_D0	10	452	67	0.617143	TRUE	0	ANXA2_HUMAN	P07355	FALSE	10_Post_D0
6	7.68524	8aug24_Sunkyung_C4-DIA_60spd_S3-B5_1_7143	Post_D7_CC	6	536	107	0.388571	FALSE	0	ANXA2_HUMAN	P07355	FALSE	6_Post_D7_CC
7	7.81472	8aug24_Sunkyung_D4-DIA_60spd_S3-C5_1_7150	Post_D7_CC	7	536	101	0.422857	FALSE	0	ANXA2_HUMAN	P07355	FALSE	7_Post_D7_CC
8	7.39211	8aug24_Sunkyung_E4-DIA_60spd_S3-D5_1_7157	Post_D7_CC	8	536	68	0.611429	TRUE	0	ANXA2_HUMAN	P07355	FALSE	8_Post_D7_CC
9	8.30189	8aug24_Sunkyung_F4-DIA_60spd_S3-E5_1_7164	Post_D7_CC	9	536	125	0.285714	FALSE	0	ANXA2_HUMAN	P07355	FALSE	9_Post_D7_CC
10	8.21174	8aug24_Sunkyung_G4-DIA_60spd_S3-F5_1_7171	Post_D7_CC	10	536	135	0.228571	FALSE	0	ANXA2_HUMAN	P07355	FALSE	10_Post_D7_CC
11	7.31357	8aug24_Sunkyung_C6-DIA_60spd_S3-B7_1_7145	Post_D7_CM	6	584	69	0.605714	TRUE	0	ANXA2_HUMAN	P07355	FALSE	6_Post_D7_CM
12	9.07128	8aug24_Sunkyung_D6-DIA_60spd_S3-C7_1_7152	Post_D7_CM	7	584	170	0.0285714	FALSE	0	ANXA2_HUMAN	P07355	FALSE	7_Post_D7_CM
13	7.78253	8aug24_Sunkyung_E6-DIA_60spd_S3-D7_1_7159	Post_D7_CM	8	584	120	0.314286	FALSE	0	ANXA2_HUMAN	P07355	FALSE	8_Post_D7_CM
14	8.47779	8aug24_Sunkyung_F6-DIA_60spd_S3-E7_1_7166	Post_D7_CM	9	584	168	0.04	FALSE	0	ANXA2_HUMAN	P07355	FALSE	9_Post_D7_CM
15	7.73078	8aug24_Sunkyung_G6-DIA_60spd_S3-F7_1_7173	Post_D7_CM	10	584	57	0.674286	TRUE	0	ANXA2_HUMAN	P07355	FALSE	10_Post_D7_CM
16	7.9086	8aug24_Sunkyung_C1b-DIA_60spd_S3-B2_1_7140	Pre_D0	1	570	132	0.245714	FALSE	0	ANXA2_HUMAN	P07355	FALSE	1_Pre_D0
17	7.72476	8aug24_Sunkyung_D1-DIA_60spd_S3-C2_1_7147	Pre_D0	2	570	114	0.348571	FALSE	0	ANXA2_HUMAN	P07355	FALSE	2_Pre_D0
18	7.80749	8aug24_Sunkyung_E1-DIA_60spd_S3-D2_1_7154	Pre_D0	3	570	105	0.4	FALSE	0	ANXA2_HUMAN	P07355	FALSE	3_Pre_D0
19	7.56672	8aug24_Sunkyung_F1-DIA_60spd_S3-E2_1_7161	Pre_D0	4	570	55	0.685714	TRUE	0	ANXA2_HUMAN	P07355	FALSE	4_Pre_D0
20	8.56401	8aug24_Sunkyung_G1-DIA_60spd_S3-F2_1_7168	Pre_D0	5	570	164	0.0628571	FALSE	0	ANXA2_HUMAN	P07355	FALSE	5_Pre_D0
21	7.72379	8aug24_Sunkyung_C3-DIA_60spd_S3-B4_1_7142	Pre_D7_CC	1	510	132	0.245714	FALSE	0	ANXA2_HUMAN	P07355	FALSE	1_Pre_D7_CC
22	8.04167	8aug24_Sunkyung_D3-DIA_60spd_S3-C4_1_7149	Pre_D7_CC	2	510	125	0.285714	FALSE	0	ANXA2_HUMAN	P07355	FALSE	2_Pre_D7_CC
23	7.38859	8aug24_Sunkyung_E3-DIA_60spd_S3-D4_1_7156	Pre_D7_CC	3	510	57	0.674286	TRUE	0	ANXA2_HUMAN	P07355	FALSE	3_Pre_D7_CC
24	7.90485	8aug24_Sunkyung_F3-DIA_60spd_S3-E4_1_7163	Pre_D7_CC	4	510	120	0.314286	FALSE	0	ANXA2_HUMAN	P07355	FALSE	4_Pre_D7_CC
25	7.65727	8aug24_Sunkyung_G3-DIA_60spd_S3-F4_1_7170	Pre_D7_CC	5	510	76	0.565714	TRUE	0	ANXA2_HUMAN	P07355	FALSE	5_Pre_D7_CC
26	7.36396	8aug24_Sunkyung_C5-DIA_60spd_S3-B6_1_7144	Pre_D7_CM	1	513	103	0.411429	FALSE	0	ANXA2_HUMAN	P07355	FALSE	1_Pre_D7_CM
27	7.60744	8aug24_Sunkyung_D5-DIA_60spd_S3-C6_1_7151	Pre_D7_CM	2	513	46	0.737143	TRUE	0	ANXA2_HUMAN	P07355	FALSE	2_Pre_D7_CM
28	7.58463	8aug24_Sunkyung_E5-DIA_60spd_S3-D6_1_7158	Pre_D7_CM	3	513	81	0.537143	TRUE	0	ANXA2_HUMAN	P07355	FALSE	3_Pre_D7_CM
29	8.23553	8aug24_Sunkyung_F5-DIA_60spd_S3-E6_1_7165	Pre_D7_CM	4	513	148	0.154286	FALSE	0	ANXA2_HUMAN	P07355	FALSE	4_Pre_D7_CM
30	8.25474	8aug24_Sunkyung_G5-DIA_60spd_S3-F6_1_7172	Pre_D7_CM	5	513	135	0.228571	FALSE	0	ANXA2_HUMAN	P07355	FALSE	5_Pre_D7_CM
2	7.10837	8aug24_Sunkyung_D2-DIA_60spd_S3-C3_1_7148	Post_D0	7	45	10	0.6	TRUE	0	ANXA4_HUMAN	P09525	FALSE	7_Post_D0
3	7.36334	8aug24_Sunkyung_E2-DIA_60spd_S3-D3_1_7155	Post_D0	8	45	25	0	FALSE	0	ANXA4_HUMAN	P09525	FALSE	8_Post_D0
5	7.41534	8aug24_Sunkyung_G2-DIA_60spd_S3-F3_1_7169	Post_D0	10	45	10	0.6	TRUE	0	ANXA4_HUMAN	P09525	FALSE	10_Post_D0
6	6.92677	8aug24_Sunkyung_C4-DIA_60spd_S3-B5_1_7143	Post_D7_CC	6	34	12	0.52	TRUE	0	ANXA4_HUMAN	P09525	FALSE	6_Post_D7_CC
9	6.46854	8aug24_Sunkyung_F4-DIA_60spd_S3-E5_1_7164	Post_D7_CC	9	34	22	0.12	FALSE	0	ANXA4_HUMAN	P09525	FALSE	9_Post_D7_CC
12	8.00394	8aug24_Sunkyung_D6-DIA_60spd_S3-C7_1_7152	Post_D7_CM	7	57	25	0	FALSE	0	ANXA4_HUMAN	P09525	FALSE	7_Post_D7_CM
13	7.33659	8aug24_Sunkyung_E6-DIA_60spd_S3-D7_1_7159	Post_D7_CM	8	57	10	0.6	TRUE	0	ANXA4_HUMAN	P09525	FALSE	8_Post_D7_CM
14	7.44929	8aug24_Sunkyung_F6-DIA_60spd_S3-E7_1_7166	Post_D7_CM	9	57	22	0.12	FALSE	0	ANXA4_HUMAN	P09525	FALSE	9_Post_D7_CM
16	7.21816	8aug24_Sunkyung_C1b-DIA_60spd_S3-B2_1_7140	Pre_D0	1	59	22	0.12	FALSE	0	ANXA4_HUMAN	P09525	FALSE	1_Pre_D0
18	6.89254	8aug24_Sunkyung_E1-DIA_60spd_S3-D2_1_7154	Pre_D0	3	59	22	0.12	FALSE	0	ANXA4_HUMAN	P09525	FALSE	3_Pre_D0
20	7.57651	8aug24_Sunkyung_G1-DIA_60spd_S3-F2_1_7168	Pre_D0	5	59	15	0.4	FALSE	0	ANXA4_HUMAN	P09525	FALSE	5_Pre_D0
21	6.27402	8aug24_Sunkyung_C3-DIA_60spd_S3-B4_1_7142	Pre_D7_CC	1	54	10	0.6	TRUE	0	ANXA4_HUMAN	P09525	FALSE	1_Pre_D7_CC
22	7.15248	8aug24_Sunkyung_D3-DIA_60spd_S3-C4_1_7149	Pre_D7_CC	2	54	22	0.12	FALSE	0	ANXA4_HUMAN	P09525	FALSE	2_Pre_D7_CC
23	5.29882	8aug24_Sunkyung_E3-DIA_60spd_S3-D4_1_7156	Pre_D7_CC	3	54	12	0.52	TRUE	0	ANXA4_HUMAN	P09525	FALSE	3_Pre_D7_CC
24	7.14929	8aug24_Sunkyung_F3-DIA_60spd_S3-E4_1_7163	Pre_D7_CC	4	54	10	0.6	TRUE	0	ANXA4_HUMAN	P09525	FALSE	4_Pre_D7_CC
26	6.57085	8aug24_Sunkyung_C5-DIA_60spd_S3-B6_1_7144	Pre_D7_CM	1	56	12	0.52	TRUE	0	ANXA4_HUMAN	P09525	FALSE	1_Pre_D7_CM
29	7.01629	8aug24_Sunkyung_F5-DIA_60spd_S3-E6_1_7165	Pre_D7_CM	4	56	22	0.12	FALSE	0	ANXA4_HUMAN	P09525	FALSE	4_Pre_D7_CM
30	6.84252	8aug24_Sunkyung_G5-DIA_60spd_S3-F6_1_7172	Pre_D7_CM	5	56	22	0.12	FALSE	0	ANXA4_HUMAN	P09525	FALSE	5_Pre_D7_CM
1	6.18626	8aug24_Sunkyung_C2-DIA_60spd_S3-B3_1_7141	Post_D0	6	380	44	0.617391	TRUE	0	ANXA5_HUMAN;cRAP-ANXA5_HUMAN	P08758;cRAP-P08758	FALSE	6_Post_D0
2	7.32328	8aug24_Sunkyung_D2-DIA_60spd_S3-C3_1_7148	Post_D0	7	380	73	0.365217	FALSE	0	ANXA5_HUMAN;cRAP-ANXA5_HUMAN	P08758;cRAP-P08758	FALSE	7_Post_D0
3	8.65503	8aug24_Sunkyung_E2-DIA_60spd_S3-D3_1_7155	Post_D0	8	380	115	0	FALSE	0	ANXA5_HUMAN;cRAP-ANXA5_HUMAN	P08758;cRAP-P08758	FALSE	8_Post_D0
4	7.41454	8aug24_Sunkyung_F2-DIA_60spd_S3-E3_1_7162	Post_D0	9	380	85	0.26087	FALSE	0	ANXA5_HUMAN;cRAP-ANXA5_HUMAN	P08758;cRAP-P08758	FALSE	9_Post_D0
5	6.97448	8aug24_Sunkyung_G2-DIA_60spd_S3-F3_1_7169	Post_D0	10	380	63	0.452174	FALSE	0	ANXA5_HUMAN;cRAP-ANXA5_HUMAN	P08758;cRAP-P08758	FALSE	10_Post_D0
6	7.4636	8aug24_Sunkyung_C4-DIA_60spd_S3-B5_1_7143	Post_D7_CC	6	304	75	0.347826	FALSE	0	ANXA5_HUMAN;cRAP-ANXA5_HUMAN	P08758;cRAP-P08758	FALSE	6_Post_D7_CC
7	7.5455	8aug24_Sunkyung_D4-DIA_60spd_S3-C5_1_7150	Post_D7_CC	7	304	63	0.452174	FALSE	0	ANXA5_HUMAN;cRAP-ANXA5_HUMAN	P08758;cRAP-P08758	FALSE	7_Post_D7_CC
8	6.94495	8aug24_Sunkyung_E4-DIA_60spd_S3-D5_1_7157	Post_D7_CC	8	304	40	0.652174	TRUE	0	ANXA5_HUMAN;cRAP-ANXA5_HUMAN	P08758;cRAP-P08758	FALSE	8_Post_D7_CC
9	7.8992	8aug24_Sunkyung_F4-DIA_60spd_S3-E5_1_7164	Post_D7_CC	9	304	63	0.452174	FALSE	0	ANXA5_HUMAN;cRAP-ANXA5_HUMAN	P08758;cRAP-P08758	FALSE	9_Post_D7_CC
10	7.87622	8aug24_Sunkyung_G4-DIA_60spd_S3-F5_1_7171	Post_D7_CC	10	304	63	0.452174	FALSE	0	ANXA5_HUMAN;cRAP-ANXA5_HUMAN	P08758;cRAP-P08758	FALSE	10_Post_D7_CC
11	6.48838	8aug24_Sunkyung_C6-DIA_60spd_S3-B7_1_7145	Post_D7_CM	6	376	22	0.808696	TRUE	0	ANXA5_HUMAN;cRAP-ANXA5_HUMAN	P08758;cRAP-P08758	FALSE	6_Post_D7_CM
12	7.4626	8aug24_Sunkyung_D6-DIA_60spd_S3-C7_1_7152	Post_D7_CM	7	376	103	0.104348	FALSE	0	ANXA5_HUMAN;cRAP-ANXA5_HUMAN	P08758;cRAP-P08758	FALSE	7_Post_D7_CM
13	7.60051	8aug24_Sunkyung_E6-DIA_60spd_S3-D7_1_7159	Post_D7_CM	8	376	85	0.26087	FALSE	0	ANXA5_HUMAN;cRAP-ANXA5_HUMAN	P08758;cRAP-P08758	FALSE	8_Post_D7_CM
14	8.39423	8aug24_Sunkyung_F6-DIA_60spd_S3-E7_1_7166	Post_D7_CM	9	376	115	0	FALSE	0	ANXA5_HUMAN;cRAP-ANXA5_HUMAN	P08758;cRAP-P08758	FALSE	9_Post_D7_CM
15	7.41463	8aug24_Sunkyung_G6-DIA_60spd_S3-F7_1_7173	Post_D7_CM	10	376	51	0.556522	TRUE	0	ANXA5_HUMAN;cRAP-ANXA5_HUMAN	P08758;cRAP-P08758	FALSE	10_Post_D7_CM
16	7.89235	8aug24_Sunkyung_C1b-DIA_60spd_S3-B2_1_7140	Pre_D0	1	365	83	0.278261	FALSE	0	ANXA5_HUMAN;cRAP-ANXA5_HUMAN	P08758;cRAP-P08758	FALSE	1_Pre_D0
17	7.63046	8aug24_Sunkyung_D1-DIA_60spd_S3-C2_1_7147	Pre_D0	2	365	75	0.347826	FALSE	0	ANXA5_HUMAN;cRAP-ANXA5_HUMAN	P08758;cRAP-P08758	FALSE	2_Pre_D0
18	7.67096	8aug24_Sunkyung_E1-DIA_60spd_S3-D2_1_7154	Pre_D0	3	365	63	0.452174	FALSE	0	ANXA5_HUMAN;cRAP-ANXA5_HUMAN	P08758;cRAP-P08758	FALSE	3_Pre_D0
19	6.58258	8aug24_Sunkyung_F1-DIA_60spd_S3-E2_1_7161	Pre_D0	4	365	51	0.556522	TRUE	0	ANXA5_HUMAN;cRAP-ANXA5_HUMAN	P08758;cRAP-P08758	FALSE	4_Pre_D0
20	7.9655	8aug24_Sunkyung_G1-DIA_60spd_S3-F2_1_7168	Pre_D0	5	365	93	0.191304	FALSE	0	ANXA5_HUMAN;cRAP-ANXA5_HUMAN	P08758;cRAP-P08758	FALSE	5_Pre_D0
21	7.53597	8aug24_Sunkyung_C3-DIA_60spd_S3-B4_1_7142	Pre_D7_CC	1	367	85	0.26087	FALSE	0	ANXA5_HUMAN;cRAP-ANXA5_HUMAN	P08758;cRAP-P08758	FALSE	1_Pre_D7_CC
22	7.97419	8aug24_Sunkyung_D3-DIA_60spd_S3-C4_1_7149	Pre_D7_CC	2	367	105	0.0869565	FALSE	0	ANXA5_HUMAN;cRAP-ANXA5_HUMAN	P08758;cRAP-P08758	FALSE	2_Pre_D7_CC
23	6.98582	8aug24_Sunkyung_E3-DIA_60spd_S3-D4_1_7156	Pre_D7_CC	3	367	51	0.556522	TRUE	0	ANXA5_HUMAN;cRAP-ANXA5_HUMAN	P08758;cRAP-P08758	FALSE	3_Pre_D7_CC
24	8.00718	8aug24_Sunkyung_F3-DIA_60spd_S3-E4_1_7163	Pre_D7_CC	4	367	63	0.452174	FALSE	0	ANXA5_HUMAN;cRAP-ANXA5_HUMAN	P08758;cRAP-P08758	FALSE	4_Pre_D7_CC
25	7.20221	8aug24_Sunkyung_G3-DIA_60spd_S3-F4_1_7170	Pre_D7_CC	5	367	63	0.452174	FALSE	0	ANXA5_HUMAN;cRAP-ANXA5_HUMAN	P08758;cRAP-P08758	FALSE	5_Pre_D7_CC
26	7.34956	8aug24_Sunkyung_C5-DIA_60spd_S3-B6_1_7144	Pre_D7_CM	1	371	73	0.365217	FALSE	0	ANXA5_HUMAN;cRAP-ANXA5_HUMAN	P08758;cRAP-P08758	FALSE	1_Pre_D7_CM
27	6.83778	8aug24_Sunkyung_D5-DIA_60spd_S3-C6_1_7151	Pre_D7_CM	2	371	51	0.556522	TRUE	0	ANXA5_HUMAN;cRAP-ANXA5_HUMAN	P08758;cRAP-P08758	FALSE	2_Pre_D7_CM
28	7.48855	8aug24_Sunkyung_E5-DIA_60spd_S3-D6_1_7158	Pre_D7_CM	3	371	61	0.469565	FALSE	0	ANXA5_HUMAN;cRAP-ANXA5_HUMAN	P08758;cRAP-P08758	FALSE	3_Pre_D7_CM
29	8.44718	8aug24_Sunkyung_F5-DIA_60spd_S3-E6_1_7165	Pre_D7_CM	4	371	105	0.0869565	FALSE	0	ANXA5_HUMAN;cRAP-ANXA5_HUMAN	P08758;cRAP-P08758	FALSE	4_Pre_D7_CM
30	8.09694	8aug24_Sunkyung_G5-DIA_60spd_S3-F6_1_7172	Pre_D7_CM	5	371	81	0.295652	FALSE	0	ANXA5_HUMAN;cRAP-ANXA5_HUMAN	P08758;cRAP-P08758	FALSE	5_Pre_D7_CM
2	6.57804	8aug24_Sunkyung_D2-DIA_60spd_S3-C3_1_7148	Post_D0	7	146	26	0.566667	TRUE	0	ANXA6_HUMAN	P08133	FALSE	7_Post_D0
3	7.37977	8aug24_Sunkyung_E2-DIA_60spd_S3-D3_1_7155	Post_D0	8	146	60	0	FALSE	0	ANXA6_HUMAN	P08133	FALSE	8_Post_D0
4	7.20371	8aug24_Sunkyung_F2-DIA_60spd_S3-E3_1_7162	Post_D0	9	146	60	0	FALSE	0	ANXA6_HUMAN	P08133	FALSE	9_Post_D0
6	7.00581	8aug24_Sunkyung_C4-DIA_60spd_S3-B5_1_7143	Post_D7_CC	6	159	37	0.383333	FALSE	0	ANXA6_HUMAN	P08133	FALSE	6_Post_D7_CC
7	6.7537	8aug24_Sunkyung_D4-DIA_60spd_S3-C5_1_7150	Post_D7_CC	7	159	26	0.566667	TRUE	0	ANXA6_HUMAN	P08133	FALSE	7_Post_D7_CC
8	6.01482	8aug24_Sunkyung_E4-DIA_60spd_S3-D5_1_7157	Post_D7_CC	8	159	15	0.75	TRUE	0	ANXA6_HUMAN	P08133	FALSE	8_Post_D7_CC
9	7.57068	8aug24_Sunkyung_F4-DIA_60spd_S3-E5_1_7164	Post_D7_CC	9	159	35	0.416667	FALSE	0	ANXA6_HUMAN	P08133	FALSE	9_Post_D7_CC
10	7.12156	8aug24_Sunkyung_G4-DIA_60spd_S3-F5_1_7171	Post_D7_CC	10	159	46	0.233333	FALSE	0	ANXA6_HUMAN	P08133	FALSE	10_Post_D7_CC
12	6.31912	8aug24_Sunkyung_D6-DIA_60spd_S3-C7_1_7152	Post_D7_CM	7	114	36	0.4	FALSE	0	ANXA6_HUMAN	P08133	FALSE	7_Post_D7_CM
13	7.16028	8aug24_Sunkyung_E6-DIA_60spd_S3-D7_1_7159	Post_D7_CM	8	114	18	0.7	TRUE	0	ANXA6_HUMAN	P08133	FALSE	8_Post_D7_CM
14	7.64576	8aug24_Sunkyung_F6-DIA_60spd_S3-E7_1_7166	Post_D7_CM	9	114	60	0	FALSE	0	ANXA6_HUMAN	P08133	FALSE	9_Post_D7_CM
16	7.50905	8aug24_Sunkyung_C1b-DIA_60spd_S3-B2_1_7140	Pre_D0	1	182	51	0.15	FALSE	0	ANXA6_HUMAN	P08133	FALSE	1_Pre_D0
17	6.96397	8aug24_Sunkyung_D1-DIA_60spd_S3-C2_1_7147	Pre_D0	2	182	28	0.533333	TRUE	0	ANXA6_HUMAN	P08133	FALSE	2_Pre_D0
18	6.99846	8aug24_Sunkyung_E1-DIA_60spd_S3-D2_1_7154	Pre_D0	3	182	27	0.55	TRUE	0	ANXA6_HUMAN	P08133	FALSE	3_Pre_D0
19	6.86324	8aug24_Sunkyung_F1-DIA_60spd_S3-E2_1_7161	Pre_D0	4	182	16	0.733333	TRUE	0	ANXA6_HUMAN	P08133	FALSE	4_Pre_D0
20	8.18	8aug24_Sunkyung_G1-DIA_60spd_S3-F2_1_7168	Pre_D0	5	182	60	0	FALSE	0	ANXA6_HUMAN	P08133	FALSE	5_Pre_D0
21	6.81297	8aug24_Sunkyung_C3-DIA_60spd_S3-B4_1_7142	Pre_D7_CC	1	106	8	0.866667	TRUE	0	ANXA6_HUMAN	P08133	FALSE	1_Pre_D7_CC
22	7.22353	8aug24_Sunkyung_D3-DIA_60spd_S3-C4_1_7149	Pre_D7_CC	2	106	46	0.233333	FALSE	0	ANXA6_HUMAN	P08133	FALSE	2_Pre_D7_CC
23	7.00048	8aug24_Sunkyung_E3-DIA_60spd_S3-D4_1_7156	Pre_D7_CC	3	106	8	0.866667	TRUE	0	ANXA6_HUMAN	P08133	FALSE	3_Pre_D7_CC
24	7.13987	8aug24_Sunkyung_F3-DIA_60spd_S3-E4_1_7163	Pre_D7_CC	4	106	18	0.7	TRUE	0	ANXA6_HUMAN	P08133	FALSE	4_Pre_D7_CC
25	6.5872	8aug24_Sunkyung_G3-DIA_60spd_S3-F4_1_7170	Pre_D7_CC	5	106	26	0.566667	TRUE	0	ANXA6_HUMAN	P08133	FALSE	5_Pre_D7_CC
26	6.81567	8aug24_Sunkyung_C5-DIA_60spd_S3-B6_1_7144	Pre_D7_CM	1	138	27	0.55	TRUE	0	ANXA6_HUMAN	P08133	FALSE	1_Pre_D7_CM
27	5.37788	8aug24_Sunkyung_D5-DIA_60spd_S3-C6_1_7151	Pre_D7_CM	2	138	10	0.833333	TRUE	0	ANXA6_HUMAN	P08133	FALSE	2_Pre_D7_CM
28	3.78034	8aug24_Sunkyung_E5-DIA_60spd_S3-D6_1_7158	Pre_D7_CM	3	138	10	0.833333	TRUE	0	ANXA6_HUMAN	P08133	FALSE	3_Pre_D7_CM
29	7.44195	8aug24_Sunkyung_F5-DIA_60spd_S3-E6_1_7165	Pre_D7_CM	4	138	60	0	FALSE	0	ANXA6_HUMAN	P08133	FALSE	4_Pre_D7_CM
30	6.99846	8aug24_Sunkyung_G5-DIA_60spd_S3-F6_1_7172	Pre_D7_CM	5	138	31	0.483333	FALSE	0	ANXA6_HUMAN	P08133	FALSE	5_Pre_D7_CM
3	4.67128	8aug24_Sunkyung_E2-DIA_60spd_S3-D3_1_7155	Post_D0	8	8	8	0.384615	FALSE	0	ANXA7_HUMAN	P20073	FALSE	8_Post_D0
6	7.06029	8aug24_Sunkyung_C4-DIA_60spd_S3-B5_1_7143	Post_D7_CC	6	29	8	0.384615	FALSE	0	ANXA7_HUMAN	P20073	FALSE	6_Post_D7_CC
9	4.32005	8aug24_Sunkyung_F4-DIA_60spd_S3-E5_1_7164	Post_D7_CC	9	29	8	0.384615	FALSE	0	ANXA7_HUMAN	P20073	FALSE	9_Post_D7_CC
10	6.57652	8aug24_Sunkyung_G4-DIA_60spd_S3-F5_1_7171	Post_D7_CC	10	29	13	0	FALSE	0	ANXA7_HUMAN	P20073	FALSE	10_Post_D7_CC
12	9.02486	8aug24_Sunkyung_D6-DIA_60spd_S3-C7_1_7152	Post_D7_CM	7	21	13	0	FALSE	0	ANXA7_HUMAN	P20073	FALSE	7_Post_D7_CM
14	5.65651	8aug24_Sunkyung_F6-DIA_60spd_S3-E7_1_7166	Post_D7_CM	9	21	8	0.384615	FALSE	0	ANXA7_HUMAN	P20073	FALSE	9_Post_D7_CM
16	5.8984	8aug24_Sunkyung_C1b-DIA_60spd_S3-B2_1_7140	Pre_D0	1	16	8	0.384615	FALSE	0	ANXA7_HUMAN	P20073	FALSE	1_Pre_D0
20	4.43713	8aug24_Sunkyung_G1-DIA_60spd_S3-F2_1_7168	Pre_D0	5	16	8	0.384615	FALSE	0	ANXA7_HUMAN	P20073	FALSE	5_Pre_D0
21	7.13541	8aug24_Sunkyung_C3-DIA_60spd_S3-B4_1_7142	Pre_D7_CC	1	21	5	0.615385	TRUE	0	ANXA7_HUMAN	P20073	FALSE	1_Pre_D7_CC
24	4.63995	8aug24_Sunkyung_F3-DIA_60spd_S3-E4_1_7163	Pre_D7_CC	4	21	8	0.384615	FALSE	0	ANXA7_HUMAN	P20073	FALSE	4_Pre_D7_CC
25	4.43713	8aug24_Sunkyung_G3-DIA_60spd_S3-F4_1_7170	Pre_D7_CC	5	21	8	0.384615	FALSE	0	ANXA7_HUMAN	P20073	FALSE	5_Pre_D7_CC
26	4.78327	8aug24_Sunkyung_C5-DIA_60spd_S3-B6_1_7144	Pre_D7_CM	1	24	8	0.384615	FALSE	0	ANXA7_HUMAN	P20073	FALSE	1_Pre_D7_CM
29	6.25017	8aug24_Sunkyung_F5-DIA_60spd_S3-E6_1_7165	Pre_D7_CM	4	24	8	0.384615	FALSE	0	ANXA7_HUMAN	P20073	FALSE	4_Pre_D7_CM
30	5.35469	8aug24_Sunkyung_G5-DIA_60spd_S3-F6_1_7172	Pre_D7_CM	5	24	8	0.384615	FALSE	0	ANXA7_HUMAN	P20073	FALSE	5_Pre_D7_CM
1	8.64831	8aug24_Sunkyung_C2-DIA_60spd_S3-B3_1_7141	Post_D0	6	44	18	0	FALSE	0	APOD_HUMAN	P05090	FALSE	6_Post_D0
2	8.44849	8aug24_Sunkyung_D2-DIA_60spd_S3-C3_1_7148	Post_D0	7	44	8	0.555556	TRUE	0	APOD_HUMAN	P05090	FALSE	7_Post_D0
4	7.04994	8aug24_Sunkyung_F2-DIA_60spd_S3-E3_1_7162	Post_D0	9	44	8	0.555556	TRUE	0	APOD_HUMAN	P05090	FALSE	9_Post_D0
5	7.66207	8aug24_Sunkyung_G2-DIA_60spd_S3-F3_1_7169	Post_D0	10	44	10	0.444444	FALSE	0	APOD_HUMAN	P05090	FALSE	10_Post_D0
7	7.13614	8aug24_Sunkyung_D4-DIA_60spd_S3-C5_1_7150	Post_D7_CC	7	16	8	0.555556	TRUE	0	APOD_HUMAN	P05090	FALSE	7_Post_D7_CC
8	7.48918	8aug24_Sunkyung_E4-DIA_60spd_S3-D5_1_7157	Post_D7_CC	8	16	8	0.555556	TRUE	0	APOD_HUMAN	P05090	FALSE	8_Post_D7_CC
12	6.74861	8aug24_Sunkyung_D6-DIA_60spd_S3-C7_1_7152	Post_D7_CM	7	16	8	0.555556	TRUE	0	APOD_HUMAN	P05090	FALSE	7_Post_D7_CM
14	7.33959	8aug24_Sunkyung_F6-DIA_60spd_S3-E7_1_7166	Post_D7_CM	9	16	8	0.555556	TRUE	0	APOD_HUMAN	P05090	FALSE	9_Post_D7_CM
16	7.70054	8aug24_Sunkyung_C1b-DIA_60spd_S3-B2_1_7140	Pre_D0	1	34	18	0	FALSE	0	APOD_HUMAN	P05090	FALSE	1_Pre_D0
17	7.71956	8aug24_Sunkyung_D1-DIA_60spd_S3-C2_1_7147	Pre_D0	2	34	8	0.555556	TRUE	0	APOD_HUMAN	P05090	FALSE	2_Pre_D0
20	7.58793	8aug24_Sunkyung_G1-DIA_60spd_S3-F2_1_7168	Pre_D0	5	34	8	0.555556	TRUE	0	APOD_HUMAN	P05090	FALSE	5_Pre_D0
21	8.02684	8aug24_Sunkyung_C3-DIA_60spd_S3-B4_1_7142	Pre_D7_CC	1	36	18	0	FALSE	0	APOD_HUMAN	P05090	FALSE	1_Pre_D7_CC
22	8.0347	8aug24_Sunkyung_D3-DIA_60spd_S3-C4_1_7149	Pre_D7_CC	2	36	18	0	FALSE	0	APOD_HUMAN	P05090	FALSE	2_Pre_D7_CC
26	8.60434	8aug24_Sunkyung_C5-DIA_60spd_S3-B6_1_7144	Pre_D7_CM	1	26	18	0	FALSE	0	APOD_HUMAN	P05090	FALSE	1_Pre_D7_CM
28	8.64153	8aug24_Sunkyung_E5-DIA_60spd_S3-D6_1_7158	Pre_D7_CM	3	26	8	0.555556	TRUE	0	APOD_HUMAN	P05090	FALSE	3_Pre_D7_CM
1	6.92097	8aug24_Sunkyung_C2-DIA_60spd_S3-B3_1_7141	Post_D0	6	372	23	0.792793	TRUE	0	APOE_HUMAN	P02649	FALSE	6_Post_D0
2	7.14865	8aug24_Sunkyung_D2-DIA_60spd_S3-C3_1_7148	Post_D0	7	372	87	0.216216	FALSE	0	APOE_HUMAN	P02649	FALSE	7_Post_D0
3	7.50099	8aug24_Sunkyung_E2-DIA_60spd_S3-D3_1_7155	Post_D0	8	372	111	0	FALSE	0	APOE_HUMAN	P02649	FALSE	8_Post_D0
4	8.87423	8aug24_Sunkyung_F2-DIA_60spd_S3-E3_1_7162	Post_D0	9	372	111	0	FALSE	0	APOE_HUMAN	P02649	FALSE	9_Post_D0
5	7.17428	8aug24_Sunkyung_G2-DIA_60spd_S3-F3_1_7169	Post_D0	10	372	40	0.63964	TRUE	0	APOE_HUMAN	P02649	FALSE	10_Post_D0
6	7.29585	8aug24_Sunkyung_C4-DIA_60spd_S3-B5_1_7143	Post_D7_CC	6	129	59	0.468468	FALSE	0	APOE_HUMAN	P02649	FALSE	6_Post_D7_CC
7	6.33763	8aug24_Sunkyung_D4-DIA_60spd_S3-C5_1_7150	Post_D7_CC	7	129	17	0.846847	TRUE	0	APOE_HUMAN	P02649	FALSE	7_Post_D7_CC
8	6.90999	8aug24_Sunkyung_E4-DIA_60spd_S3-D5_1_7157	Post_D7_CC	8	129	41	0.630631	TRUE	0	APOE_HUMAN	P02649	FALSE	8_Post_D7_CC
9	6.22494	8aug24_Sunkyung_F4-DIA_60spd_S3-E5_1_7164	Post_D7_CC	9	129	12	0.891892	TRUE	0	APOE_HUMAN	P02649	FALSE	9_Post_D7_CC
11	7.05847	8aug24_Sunkyung_C6-DIA_60spd_S3-B7_1_7145	Post_D7_CM	6	251	64	0.423423	FALSE	0	APOE_HUMAN	P02649	FALSE	6_Post_D7_CM
12	6.56387	8aug24_Sunkyung_D6-DIA_60spd_S3-C7_1_7152	Post_D7_CM	7	251	28	0.747748	TRUE	0	APOE_HUMAN	P02649	FALSE	7_Post_D7_CM
13	6.98816	8aug24_Sunkyung_E6-DIA_60spd_S3-D7_1_7159	Post_D7_CM	8	251	48	0.567568	TRUE	0	APOE_HUMAN	P02649	FALSE	8_Post_D7_CM
14	7.15297	8aug24_Sunkyung_F6-DIA_60spd_S3-E7_1_7166	Post_D7_CM	9	251	99	0.108108	FALSE	0	APOE_HUMAN	P02649	FALSE	9_Post_D7_CM
15	6.70506	8aug24_Sunkyung_G6-DIA_60spd_S3-F7_1_7173	Post_D7_CM	10	251	12	0.891892	TRUE	0	APOE_HUMAN	P02649	FALSE	10_Post_D7_CM
16	7.31883	8aug24_Sunkyung_C1b-DIA_60spd_S3-B2_1_7140	Pre_D0	1	199	52	0.531532	TRUE	0	APOE_HUMAN	P02649	FALSE	1_Pre_D0
17	7.33708	8aug24_Sunkyung_D1-DIA_60spd_S3-C2_1_7147	Pre_D0	2	199	52	0.531532	TRUE	0	APOE_HUMAN	P02649	FALSE	2_Pre_D0
18	7.52009	8aug24_Sunkyung_E1-DIA_60spd_S3-D2_1_7154	Pre_D0	3	199	59	0.468468	FALSE	0	APOE_HUMAN	P02649	FALSE	3_Pre_D0
19	7.00801	8aug24_Sunkyung_F1-DIA_60spd_S3-E2_1_7161	Pre_D0	4	199	24	0.783784	TRUE	0	APOE_HUMAN	P02649	FALSE	4_Pre_D0
20	6.10331	8aug24_Sunkyung_G1-DIA_60spd_S3-F2_1_7168	Pre_D0	5	199	12	0.891892	TRUE	0	APOE_HUMAN	P02649	FALSE	5_Pre_D0
21	7.41731	8aug24_Sunkyung_C3-DIA_60spd_S3-B4_1_7142	Pre_D7_CC	1	204	87	0.216216	FALSE	0	APOE_HUMAN	P02649	FALSE	1_Pre_D7_CC
22	7.683	8aug24_Sunkyung_D3-DIA_60spd_S3-C4_1_7149	Pre_D7_CC	2	204	52	0.531532	TRUE	0	APOE_HUMAN	P02649	FALSE	2_Pre_D7_CC
23	7.08204	8aug24_Sunkyung_E3-DIA_60spd_S3-D4_1_7156	Pre_D7_CC	3	204	29	0.738739	TRUE	0	APOE_HUMAN	P02649	FALSE	3_Pre_D7_CC
24	6.01195	8aug24_Sunkyung_F3-DIA_60spd_S3-E4_1_7163	Pre_D7_CC	4	204	24	0.783784	TRUE	0	APOE_HUMAN	P02649	FALSE	4_Pre_D7_CC
25	6.0306	8aug24_Sunkyung_G3-DIA_60spd_S3-F4_1_7170	Pre_D7_CC	5	204	12	0.891892	TRUE	0	APOE_HUMAN	P02649	FALSE	5_Pre_D7_CC
26	7.93474	8aug24_Sunkyung_C5-DIA_60spd_S3-B6_1_7144	Pre_D7_CM	1	345	111	0	FALSE	0	APOE_HUMAN	P02649	FALSE	1_Pre_D7_CM
27	6.84347	8aug24_Sunkyung_D5-DIA_60spd_S3-C6_1_7151	Pre_D7_CM	2	345	12	0.891892	TRUE	0	APOE_HUMAN	P02649	FALSE	2_Pre_D7_CM
28	8.59655	8aug24_Sunkyung_E5-DIA_60spd_S3-D6_1_7158	Pre_D7_CM	3	345	111	0	FALSE	0	APOE_HUMAN	P02649	FALSE	3_Pre_D7_CM
29	7.42836	8aug24_Sunkyung_F5-DIA_60spd_S3-E6_1_7165	Pre_D7_CM	4	345	76	0.315315	FALSE	0	APOE_HUMAN	P02649	FALSE	4_Pre_D7_CM
30	7.13844	8aug24_Sunkyung_G5-DIA_60spd_S3-F6_1_7172	Pre_D7_CM	5	345	35	0.684685	TRUE	0	APOE_HUMAN	P02649	FALSE	5_Pre_D7_CM
4	6.37818	8aug24_Sunkyung_F2-DIA_60spd_S3-E3_1_7162	Post_D0	9	28	28	0	FALSE	0	APT_HUMAN	P07741	FALSE	9_Post_D0
12	8.02055	8aug24_Sunkyung_D6-DIA_60spd_S3-C7_1_7152	Post_D7_CM	7	60	28	0	FALSE	0	APT_HUMAN	P07741	FALSE	7_Post_D7_CM
13	5.23682	8aug24_Sunkyung_E6-DIA_60spd_S3-D7_1_7159	Post_D7_CM	8	60	9	0.678571	TRUE	0	APT_HUMAN	P07741	FALSE	8_Post_D7_CM
14	6.32611	8aug24_Sunkyung_F6-DIA_60spd_S3-E7_1_7166	Post_D7_CM	9	60	23	0.178571	FALSE	0	APT_HUMAN	P07741	FALSE	9_Post_D7_CM
16	6.48944	8aug24_Sunkyung_C1b-DIA_60spd_S3-B2_1_7140	Pre_D0	1	43	15	0.464286	FALSE	0	APT_HUMAN	P07741	FALSE	1_Pre_D0
20	7.00367	8aug24_Sunkyung_G1-DIA_60spd_S3-F2_1_7168	Pre_D0	5	43	28	0	FALSE	0	APT_HUMAN	P07741	FALSE	5_Pre_D0
22	6.47544	8aug24_Sunkyung_D3-DIA_60spd_S3-C4_1_7149	Pre_D7_CC	2	6	6	0.785714	TRUE	0	APT_HUMAN	P07741	FALSE	2_Pre_D7_CC
29	6.71684	8aug24_Sunkyung_F5-DIA_60spd_S3-E6_1_7165	Pre_D7_CM	4	23	8	0.714286	TRUE	0	APT_HUMAN	P07741	FALSE	4_Pre_D7_CM
30	6.22487	8aug24_Sunkyung_G5-DIA_60spd_S3-F6_1_7172	Pre_D7_CM	5	23	15	0.464286	FALSE	0	APT_HUMAN	P07741	FALSE	5_Pre_D7_CM
1	5.06244	8aug24_Sunkyung_C2-DIA_60spd_S3-B3_1_7141	Post_D0	6	72	10	0.666667	TRUE	0	ARF4_HUMAN	P18085	FALSE	6_Post_D0
3	7.79177	8aug24_Sunkyung_E2-DIA_60spd_S3-D3_1_7155	Post_D0	8	72	30	0	FALSE	0	ARF4_HUMAN	P18085	FALSE	8_Post_D0
4	7.37575	8aug24_Sunkyung_F2-DIA_60spd_S3-E3_1_7162	Post_D0	9	72	22	0.266667	FALSE	0	ARF4_HUMAN	P18085	FALSE	9_Post_D0
5	5.55567	8aug24_Sunkyung_G2-DIA_60spd_S3-F3_1_7169	Post_D0	10	72	10	0.666667	TRUE	0	ARF4_HUMAN	P18085	FALSE	10_Post_D0
6	6.7911	8aug24_Sunkyung_C4-DIA_60spd_S3-B5_1_7143	Post_D7_CC	6	68	30	0	FALSE	0	ARF4_HUMAN	P18085	FALSE	6_Post_D7_CC
7	5.29485	8aug24_Sunkyung_D4-DIA_60spd_S3-C5_1_7150	Post_D7_CC	7	68	10	0.666667	TRUE	0	ARF4_HUMAN	P18085	FALSE	7_Post_D7_CC
8	3.93277	8aug24_Sunkyung_E4-DIA_60spd_S3-D5_1_7157	Post_D7_CC	8	68	10	0.666667	TRUE	0	ARF4_HUMAN	P18085	FALSE	8_Post_D7_CC
9	6.31393	8aug24_Sunkyung_F4-DIA_60spd_S3-E5_1_7164	Post_D7_CC	9	68	18	0.4	FALSE	0	ARF4_HUMAN	P18085	FALSE	9_Post_D7_CC
11	3.64829	8aug24_Sunkyung_C6-DIA_60spd_S3-B7_1_7145	Post_D7_CM	6	84	12	0.6	TRUE	0	ARF4_HUMAN	P18085	FALSE	6_Post_D7_CM
12	8.12361	8aug24_Sunkyung_D6-DIA_60spd_S3-C7_1_7152	Post_D7_CM	7	84	22	0.266667	FALSE	0	ARF4_HUMAN	P18085	FALSE	7_Post_D7_CM
13	6.57834	8aug24_Sunkyung_E6-DIA_60spd_S3-D7_1_7159	Post_D7_CM	8	84	10	0.666667	TRUE	0	ARF4_HUMAN	P18085	FALSE	8_Post_D7_CM
14	7.846	8aug24_Sunkyung_F6-DIA_60spd_S3-E7_1_7166	Post_D7_CM	9	84	30	0	FALSE	0	ARF4_HUMAN	P18085	FALSE	9_Post_D7_CM
15	3.21857	8aug24_Sunkyung_G6-DIA_60spd_S3-F7_1_7173	Post_D7_CM	10	84	10	0.666667	TRUE	0	ARF4_HUMAN	P18085	FALSE	10_Post_D7_CM
16	7.20306	8aug24_Sunkyung_C1b-DIA_60spd_S3-B2_1_7140	Pre_D0	1	72	18	0.4	FALSE	0	ARF4_HUMAN	P18085	FALSE	1_Pre_D0
17	5.42323	8aug24_Sunkyung_D1-DIA_60spd_S3-C2_1_7147	Pre_D0	2	72	10	0.666667	TRUE	0	ARF4_HUMAN	P18085	FALSE	2_Pre_D0
18	6.88622	8aug24_Sunkyung_E1-DIA_60spd_S3-D2_1_7154	Pre_D0	3	72	10	0.666667	TRUE	0	ARF4_HUMAN	P18085	FALSE	3_Pre_D0
19	7.5515	8aug24_Sunkyung_F1-DIA_60spd_S3-E2_1_7161	Pre_D0	4	72	12	0.6	TRUE	0	ARF4_HUMAN	P18085	FALSE	4_Pre_D0
20	8.71824	8aug24_Sunkyung_G1-DIA_60spd_S3-F2_1_7168	Pre_D0	5	72	22	0.266667	FALSE	0	ARF4_HUMAN	P18085	FALSE	5_Pre_D0
21	6.83092	8aug24_Sunkyung_C3-DIA_60spd_S3-B4_1_7142	Pre_D7_CC	1	50	22	0.266667	FALSE	0	ARF4_HUMAN	P18085	FALSE	1_Pre_D7_CC
24	5.65196	8aug24_Sunkyung_F3-DIA_60spd_S3-E4_1_7163	Pre_D7_CC	4	50	18	0.4	FALSE	0	ARF4_HUMAN	P18085	FALSE	4_Pre_D7_CC
25	5.45889	8aug24_Sunkyung_G3-DIA_60spd_S3-F4_1_7170	Pre_D7_CC	5	50	10	0.666667	TRUE	0	ARF4_HUMAN	P18085	FALSE	5_Pre_D7_CC
26	2.88422	8aug24_Sunkyung_C5-DIA_60spd_S3-B6_1_7144	Pre_D7_CM	1	72	10	0.666667	TRUE	0	ARF4_HUMAN	P18085	FALSE	1_Pre_D7_CM
28	5.88197	8aug24_Sunkyung_E5-DIA_60spd_S3-D6_1_7158	Pre_D7_CM	3	72	10	0.666667	TRUE	0	ARF4_HUMAN	P18085	FALSE	3_Pre_D7_CM
29	7.54982	8aug24_Sunkyung_F5-DIA_60spd_S3-E6_1_7165	Pre_D7_CM	4	72	30	0	FALSE	0	ARF4_HUMAN	P18085	FALSE	4_Pre_D7_CM
30	7.02819	8aug24_Sunkyung_G5-DIA_60spd_S3-F6_1_7172	Pre_D7_CM	5	72	22	0.266667	FALSE	0	ARF4_HUMAN	P18085	FALSE	5_Pre_D7_CM
1	7.45733	8aug24_Sunkyung_C2-DIA_60spd_S3-B3_1_7141	Post_D0	6	134	32	0.372549	FALSE	0	ARGI1_HUMAN	P05089	FALSE	6_Post_D0
2	6.48316	8aug24_Sunkyung_D2-DIA_60spd_S3-C3_1_7148	Post_D0	7	134	32	0.372549	FALSE	0	ARGI1_HUMAN	P05089	FALSE	7_Post_D0
3	6.46547	8aug24_Sunkyung_E2-DIA_60spd_S3-D3_1_7155	Post_D0	8	134	23	0.54902	TRUE	0	ARGI1_HUMAN	P05089	FALSE	8_Post_D0
5	7.32853	8aug24_Sunkyung_G2-DIA_60spd_S3-F3_1_7169	Post_D0	10	134	47	0.0784314	FALSE	0	ARGI1_HUMAN	P05089	FALSE	10_Post_D0
6	6.57986	8aug24_Sunkyung_C4-DIA_60spd_S3-B5_1_7143	Post_D7_CC	6	115	47	0.0784314	FALSE	0	ARGI1_HUMAN	P05089	FALSE	6_Post_D7_CC
7	8.04944	8aug24_Sunkyung_D4-DIA_60spd_S3-C5_1_7150	Post_D7_CC	7	115	36	0.294118	FALSE	0	ARGI1_HUMAN	P05089	FALSE	7_Post_D7_CC
8	6.46547	8aug24_Sunkyung_E4-DIA_60spd_S3-D5_1_7157	Post_D7_CC	8	115	11	0.784314	TRUE	0	ARGI1_HUMAN	P05089	FALSE	8_Post_D7_CC
10	5.85275	8aug24_Sunkyung_G4-DIA_60spd_S3-F5_1_7171	Post_D7_CC	10	115	21	0.588235	TRUE	0	ARGI1_HUMAN	P05089	FALSE	10_Post_D7_CC
11	6.78968	8aug24_Sunkyung_C6-DIA_60spd_S3-B7_1_7145	Post_D7_CM	6	108	32	0.372549	FALSE	0	ARGI1_HUMAN	P05089	FALSE	6_Post_D7_CM
12	9.68735	8aug24_Sunkyung_D6-DIA_60spd_S3-C7_1_7152	Post_D7_CM	7	108	51	0	FALSE	0	ARGI1_HUMAN	P05089	FALSE	7_Post_D7_CM
13	7.49098	8aug24_Sunkyung_E6-DIA_60spd_S3-D7_1_7159	Post_D7_CM	8	108	9	0.823529	TRUE	0	ARGI1_HUMAN	P05089	FALSE	8_Post_D7_CM
14	6.56355	8aug24_Sunkyung_F6-DIA_60spd_S3-E7_1_7166	Post_D7_CM	9	108	16	0.686275	TRUE	0	ARGI1_HUMAN	P05089	FALSE	9_Post_D7_CM
16	7.0469	8aug24_Sunkyung_C1b-DIA_60spd_S3-B2_1_7140	Pre_D0	1	108	41	0.196078	FALSE	0	ARGI1_HUMAN	P05089	FALSE	1_Pre_D0
17	6.46547	8aug24_Sunkyung_D1-DIA_60spd_S3-C2_1_7147	Pre_D0	2	108	23	0.54902	TRUE	0	ARGI1_HUMAN	P05089	FALSE	2_Pre_D0
18	5.73247	8aug24_Sunkyung_E1-DIA_60spd_S3-D2_1_7154	Pre_D0	3	108	12	0.764706	TRUE	0	ARGI1_HUMAN	P05089	FALSE	3_Pre_D0
19	6.38939	8aug24_Sunkyung_F1-DIA_60spd_S3-E2_1_7161	Pre_D0	4	108	32	0.372549	FALSE	0	ARGI1_HUMAN	P05089	FALSE	4_Pre_D0
21	7.24589	8aug24_Sunkyung_C3-DIA_60spd_S3-B4_1_7142	Pre_D7_CC	1	84	27	0.470588	FALSE	0	ARGI1_HUMAN	P05089	FALSE	1_Pre_D7_CC
22	7.29484	8aug24_Sunkyung_D3-DIA_60spd_S3-C4_1_7149	Pre_D7_CC	2	84	11	0.784314	TRUE	0	ARGI1_HUMAN	P05089	FALSE	2_Pre_D7_CC
23	5.85275	8aug24_Sunkyung_E3-DIA_60spd_S3-D4_1_7156	Pre_D7_CC	3	84	23	0.54902	TRUE	0	ARGI1_HUMAN	P05089	FALSE	3_Pre_D7_CC
25	6.58377	8aug24_Sunkyung_G3-DIA_60spd_S3-F4_1_7170	Pre_D7_CC	5	84	23	0.54902	TRUE	0	ARGI1_HUMAN	P05089	FALSE	5_Pre_D7_CC
26	6.2532	8aug24_Sunkyung_C5-DIA_60spd_S3-B6_1_7144	Pre_D7_CM	1	44	11	0.784314	TRUE	0	ARGI1_HUMAN	P05089	FALSE	1_Pre_D7_CM
27	7.13884	8aug24_Sunkyung_D5-DIA_60spd_S3-C6_1_7151	Pre_D7_CM	2	44	11	0.784314	TRUE	0	ARGI1_HUMAN	P05089	FALSE	2_Pre_D7_CM
28	6.46547	8aug24_Sunkyung_E5-DIA_60spd_S3-D6_1_7158	Pre_D7_CM	3	44	11	0.784314	TRUE	0	ARGI1_HUMAN	P05089	FALSE	3_Pre_D7_CM
29	6.22565	8aug24_Sunkyung_F5-DIA_60spd_S3-E6_1_7165	Pre_D7_CM	4	44	11	0.784314	TRUE	0	ARGI1_HUMAN	P05089	FALSE	4_Pre_D7_CM
1	7.75032	8aug24_Sunkyung_C2-DIA_60spd_S3-B3_1_7141	Post_D0	6	130	11	0.796296	TRUE	0	ARP3_HUMAN	P61158	FALSE	6_Post_D0
2	7.83615	8aug24_Sunkyung_D2-DIA_60spd_S3-C3_1_7148	Post_D0	7	130	36	0.333333	FALSE	0	ARP3_HUMAN	P61158	FALSE	7_Post_D0
3	8.09921	8aug24_Sunkyung_E2-DIA_60spd_S3-D3_1_7155	Post_D0	8	130	47	0.12963	FALSE	0	ARP3_HUMAN	P61158	FALSE	8_Post_D0
4	7.51781	8aug24_Sunkyung_F2-DIA_60spd_S3-E3_1_7162	Post_D0	9	130	36	0.333333	FALSE	0	ARP3_HUMAN	P61158	FALSE	9_Post_D0
6	7.47388	8aug24_Sunkyung_C4-DIA_60spd_S3-B5_1_7143	Post_D7_CC	6	85	12	0.777778	TRUE	0	ARP3_HUMAN	P61158	FALSE	6_Post_D7_CC
7	5.36153	8aug24_Sunkyung_D4-DIA_60spd_S3-C5_1_7150	Post_D7_CC	7	85	12	0.777778	TRUE	0	ARP3_HUMAN	P61158	FALSE	7_Post_D7_CC
8	7.99693	8aug24_Sunkyung_E4-DIA_60spd_S3-D5_1_7157	Post_D7_CC	8	85	11	0.796296	TRUE	0	ARP3_HUMAN	P61158	FALSE	8_Post_D7_CC
9	7.536	8aug24_Sunkyung_F4-DIA_60spd_S3-E5_1_7164	Post_D7_CC	9	85	35	0.351852	FALSE	0	ARP3_HUMAN	P61158	FALSE	9_Post_D7_CC
10	8.0708	8aug24_Sunkyung_G4-DIA_60spd_S3-F5_1_7171	Post_D7_CC	10	85	15	0.722222	TRUE	0	ARP3_HUMAN	P61158	FALSE	10_Post_D7_CC
12	8.57306	8aug24_Sunkyung_D6-DIA_60spd_S3-C7_1_7152	Post_D7_CM	7	163	54	0	FALSE	0	ARP3_HUMAN	P61158	FALSE	7_Post_D7_CM
13	7.85949	8aug24_Sunkyung_E6-DIA_60spd_S3-D7_1_7159	Post_D7_CM	8	163	35	0.351852	FALSE	0	ARP3_HUMAN	P61158	FALSE	8_Post_D7_CM
14	7.9613	8aug24_Sunkyung_F6-DIA_60spd_S3-E7_1_7166	Post_D7_CM	9	163	51	0.0555556	FALSE	0	ARP3_HUMAN	P61158	FALSE	9_Post_D7_CM
15	8.25314	8aug24_Sunkyung_G6-DIA_60spd_S3-F7_1_7173	Post_D7_CM	10	163	23	0.574074	TRUE	0	ARP3_HUMAN	P61158	FALSE	10_Post_D7_CM
16	5.98739	8aug24_Sunkyung_C1b-DIA_60spd_S3-B2_1_7140	Pre_D0	1	125	12	0.777778	TRUE	0	ARP3_HUMAN	P61158	FALSE	1_Pre_D0
17	7.77704	8aug24_Sunkyung_D1-DIA_60spd_S3-C2_1_7147	Pre_D0	2	125	35	0.351852	FALSE	0	ARP3_HUMAN	P61158	FALSE	2_Pre_D0
18	7.50229	8aug24_Sunkyung_E1-DIA_60spd_S3-D2_1_7154	Pre_D0	3	125	19	0.648148	TRUE	0	ARP3_HUMAN	P61158	FALSE	3_Pre_D0
19	7.26682	8aug24_Sunkyung_F1-DIA_60spd_S3-E2_1_7161	Pre_D0	4	125	23	0.574074	TRUE	0	ARP3_HUMAN	P61158	FALSE	4_Pre_D0
20	7.39517	8aug24_Sunkyung_G1-DIA_60spd_S3-F2_1_7168	Pre_D0	5	125	36	0.333333	FALSE	0	ARP3_HUMAN	P61158	FALSE	5_Pre_D0
22	8.42127	8aug24_Sunkyung_D3-DIA_60spd_S3-C4_1_7149	Pre_D7_CC	2	50	24	0.555556	TRUE	0	ARP3_HUMAN	P61158	FALSE	2_Pre_D7_CC
24	7.75481	8aug24_Sunkyung_F3-DIA_60spd_S3-E4_1_7163	Pre_D7_CC	4	50	26	0.518519	TRUE	0	ARP3_HUMAN	P61158	FALSE	4_Pre_D7_CC
26	8.30185	8aug24_Sunkyung_C5-DIA_60spd_S3-B6_1_7144	Pre_D7_CM	1	119	12	0.777778	TRUE	0	ARP3_HUMAN	P61158	FALSE	1_Pre_D7_CM
28	7.57141	8aug24_Sunkyung_E5-DIA_60spd_S3-D6_1_7158	Pre_D7_CM	3	119	24	0.555556	TRUE	0	ARP3_HUMAN	P61158	FALSE	3_Pre_D7_CM
29	7.17287	8aug24_Sunkyung_F5-DIA_60spd_S3-E6_1_7165	Pre_D7_CM	4	119	36	0.333333	FALSE	0	ARP3_HUMAN	P61158	FALSE	4_Pre_D7_CM
30	8.16717	8aug24_Sunkyung_G5-DIA_60spd_S3-F6_1_7172	Pre_D7_CM	5	119	47	0.12963	FALSE	0	ARP3_HUMAN	P61158	FALSE	5_Pre_D7_CM
2	6.86546	8aug24_Sunkyung_D2-DIA_60spd_S3-C3_1_7148	Post_D0	7	46	6	0.75	TRUE	0	ASSY_HUMAN	P00966	FALSE	7_Post_D0
3	6.53833	8aug24_Sunkyung_E2-DIA_60spd_S3-D3_1_7155	Post_D0	8	46	16	0.333333	FALSE	0	ASSY_HUMAN	P00966	FALSE	8_Post_D0
4	6.20217	8aug24_Sunkyung_F2-DIA_60spd_S3-E3_1_7162	Post_D0	9	46	24	0	FALSE	0	ASSY_HUMAN	P00966	FALSE	9_Post_D0
9	5.40158	8aug24_Sunkyung_F4-DIA_60spd_S3-E5_1_7164	Post_D7_CC	9	22	16	0.333333	FALSE	0	ASSY_HUMAN	P00966	FALSE	9_Post_D7_CC
10	6.39381	8aug24_Sunkyung_G4-DIA_60spd_S3-F5_1_7171	Post_D7_CC	10	22	6	0.75	TRUE	0	ASSY_HUMAN	P00966	FALSE	10_Post_D7_CC
12	6.31185	8aug24_Sunkyung_D6-DIA_60spd_S3-C7_1_7152	Post_D7_CM	7	64	24	0	FALSE	0	ASSY_HUMAN	P00966	FALSE	7_Post_D7_CM
14	6.75494	8aug24_Sunkyung_F6-DIA_60spd_S3-E7_1_7166	Post_D7_CM	9	64	24	0	FALSE	0	ASSY_HUMAN	P00966	FALSE	9_Post_D7_CM
15	6.35083	8aug24_Sunkyung_G6-DIA_60spd_S3-F7_1_7173	Post_D7_CM	10	64	16	0.333333	FALSE	0	ASSY_HUMAN	P00966	FALSE	10_Post_D7_CM
16	6.05415	8aug24_Sunkyung_C1b-DIA_60spd_S3-B2_1_7140	Pre_D0	1	52	6	0.75	TRUE	0	ASSY_HUMAN	P00966	FALSE	1_Pre_D0
17	5.64008	8aug24_Sunkyung_D1-DIA_60spd_S3-C2_1_7147	Pre_D0	2	52	6	0.75	TRUE	0	ASSY_HUMAN	P00966	FALSE	2_Pre_D0
18	6.95338	8aug24_Sunkyung_E1-DIA_60spd_S3-D2_1_7154	Pre_D0	3	52	16	0.333333	FALSE	0	ASSY_HUMAN	P00966	FALSE	3_Pre_D0
20	7.30996	8aug24_Sunkyung_G1-DIA_60spd_S3-F2_1_7168	Pre_D0	5	52	24	0	FALSE	0	ASSY_HUMAN	P00966	FALSE	5_Pre_D0
21	6.66388	8aug24_Sunkyung_C3-DIA_60spd_S3-B4_1_7142	Pre_D7_CC	1	22	6	0.75	TRUE	0	ASSY_HUMAN	P00966	FALSE	1_Pre_D7_CC
23	6.47849	8aug24_Sunkyung_E3-DIA_60spd_S3-D4_1_7156	Pre_D7_CC	3	22	6	0.75	TRUE	0	ASSY_HUMAN	P00966	FALSE	3_Pre_D7_CC
25	5.29366	8aug24_Sunkyung_G3-DIA_60spd_S3-F4_1_7170	Pre_D7_CC	5	22	10	0.583333	TRUE	0	ASSY_HUMAN	P00966	FALSE	5_Pre_D7_CC
28	7.22259	8aug24_Sunkyung_E5-DIA_60spd_S3-D6_1_7158	Pre_D7_CM	3	58	10	0.583333	TRUE	0	ASSY_HUMAN	P00966	FALSE	3_Pre_D7_CM
29	7.0878	8aug24_Sunkyung_F5-DIA_60spd_S3-E6_1_7165	Pre_D7_CM	4	58	24	0	FALSE	0	ASSY_HUMAN	P00966	FALSE	4_Pre_D7_CM
30	6.52723	8aug24_Sunkyung_G5-DIA_60spd_S3-F6_1_7172	Pre_D7_CM	5	58	24	0	FALSE	0	ASSY_HUMAN	P00966	FALSE	5_Pre_D7_CM
3	4.81114	8aug24_Sunkyung_E2-DIA_60spd_S3-D3_1_7155	Post_D0	8	22	11	0	FALSE	0	AT1A1_HUMAN	P05023	FALSE	8_Post_D0
4	0.271754	8aug24_Sunkyung_F2-DIA_60spd_S3-E3_1_7162	Post_D0	9	22	11	0	FALSE	0	AT1A1_HUMAN	P05023	FALSE	9_Post_D0
8	6.10341	8aug24_Sunkyung_E4-DIA_60spd_S3-D5_1_7157	Post_D7_CC	8	11	11	0	FALSE	0	AT1A1_HUMAN	P05023	FALSE	8_Post_D7_CC
12	0.271754	8aug24_Sunkyung_D6-DIA_60spd_S3-C7_1_7152	Post_D7_CM	7	33	11	0	FALSE	0	AT1A1_HUMAN	P05023	FALSE	7_Post_D7_CM
13	0.200334	8aug24_Sunkyung_E6-DIA_60spd_S3-D7_1_7159	Post_D7_CM	8	33	11	0	FALSE	0	AT1A1_HUMAN	P05023	FALSE	8_Post_D7_CM
14	6.88717	8aug24_Sunkyung_F6-DIA_60spd_S3-E7_1_7166	Post_D7_CM	9	33	11	0	FALSE	0	AT1A1_HUMAN	P05023	FALSE	9_Post_D7_CM
16	5.63967	8aug24_Sunkyung_C1b-DIA_60spd_S3-B2_1_7140	Pre_D0	1	22	11	0	FALSE	0	AT1A1_HUMAN	P05023	FALSE	1_Pre_D0
20	6.0272	8aug24_Sunkyung_G1-DIA_60spd_S3-F2_1_7168	Pre_D0	5	22	11	0	FALSE	0	AT1A1_HUMAN	P05023	FALSE	5_Pre_D0
29	5.48255	8aug24_Sunkyung_F5-DIA_60spd_S3-E6_1_7165	Pre_D7_CM	4	22	11	0	FALSE	0	AT1A1_HUMAN	P05023	FALSE	4_Pre_D7_CM
30	5.82449	8aug24_Sunkyung_G5-DIA_60spd_S3-F6_1_7172	Pre_D7_CM	5	22	11	0	FALSE	0	AT1A1_HUMAN	P05023	FALSE	5_Pre_D7_CM
1	7.11958	8aug24_Sunkyung_C2-DIA_60spd_S3-B3_1_7141	Post_D0	6	277	12	0.895652	TRUE	0	ATPB_HUMAN	P06576	FALSE	6_Post_D0
2	7.28168	8aug24_Sunkyung_D2-DIA_60spd_S3-C3_1_7148	Post_D0	7	277	46	0.6	TRUE	0	ATPB_HUMAN	P06576	FALSE	7_Post_D0
3	7.26065	8aug24_Sunkyung_E2-DIA_60spd_S3-D3_1_7155	Post_D0	8	277	115	0	FALSE	0	ATPB_HUMAN	P06576	FALSE	8_Post_D0
4	6.9873	8aug24_Sunkyung_F2-DIA_60spd_S3-E3_1_7162	Post_D0	9	277	94	0.182609	FALSE	0	ATPB_HUMAN	P06576	FALSE	9_Post_D0
5	6.62593	8aug24_Sunkyung_G2-DIA_60spd_S3-F3_1_7169	Post_D0	10	277	10	0.913043	TRUE	0	ATPB_HUMAN	P06576	FALSE	10_Post_D0
6	6.97444	8aug24_Sunkyung_C4-DIA_60spd_S3-B5_1_7143	Post_D7_CC	6	383	115	0	FALSE	0	ATPB_HUMAN	P06576	FALSE	6_Post_D7_CC
7	6.31049	8aug24_Sunkyung_D4-DIA_60spd_S3-C5_1_7150	Post_D7_CC	7	383	69	0.4	FALSE	0	ATPB_HUMAN	P06576	FALSE	7_Post_D7_CC
8	6.60289	8aug24_Sunkyung_E4-DIA_60spd_S3-D5_1_7157	Post_D7_CC	8	383	57	0.504348	TRUE	0	ATPB_HUMAN	P06576	FALSE	8_Post_D7_CC
9	7.1786	8aug24_Sunkyung_F4-DIA_60spd_S3-E5_1_7164	Post_D7_CC	9	383	60	0.478261	FALSE	0	ATPB_HUMAN	P06576	FALSE	9_Post_D7_CC
10	7.17347	8aug24_Sunkyung_G4-DIA_60spd_S3-F5_1_7171	Post_D7_CC	10	383	82	0.286957	FALSE	0	ATPB_HUMAN	P06576	FALSE	10_Post_D7_CC
11	5.8179	8aug24_Sunkyung_C6-DIA_60spd_S3-B7_1_7145	Post_D7_CM	6	335	12	0.895652	TRUE	0	ATPB_HUMAN	P06576	FALSE	6_Post_D7_CM
12	7.20782	8aug24_Sunkyung_D6-DIA_60spd_S3-C7_1_7152	Post_D7_CM	7	335	79	0.313043	FALSE	0	ATPB_HUMAN	P06576	FALSE	7_Post_D7_CM
13	6.97305	8aug24_Sunkyung_E6-DIA_60spd_S3-D7_1_7159	Post_D7_CM	8	335	81	0.295652	FALSE	0	ATPB_HUMAN	P06576	FALSE	8_Post_D7_CM
14	7.99404	8aug24_Sunkyung_F6-DIA_60spd_S3-E7_1_7166	Post_D7_CM	9	335	115	0	FALSE	0	ATPB_HUMAN	P06576	FALSE	9_Post_D7_CM
15	6.33331	8aug24_Sunkyung_G6-DIA_60spd_S3-F7_1_7173	Post_D7_CM	10	335	48	0.582609	TRUE	0	ATPB_HUMAN	P06576	FALSE	10_Post_D7_CM
16	7.26112	8aug24_Sunkyung_C1b-DIA_60spd_S3-B2_1_7140	Pre_D0	1	398	96	0.165217	FALSE	0	ATPB_HUMAN	P06576	FALSE	1_Pre_D0
17	6.65429	8aug24_Sunkyung_D1-DIA_60spd_S3-C2_1_7147	Pre_D0	2	398	79	0.313043	FALSE	0	ATPB_HUMAN	P06576	FALSE	2_Pre_D0
18	6.92238	8aug24_Sunkyung_E1-DIA_60spd_S3-D2_1_7154	Pre_D0	3	398	96	0.165217	FALSE	0	ATPB_HUMAN	P06576	FALSE	3_Pre_D0
19	6.77463	8aug24_Sunkyung_F1-DIA_60spd_S3-E2_1_7161	Pre_D0	4	398	12	0.895652	TRUE	0	ATPB_HUMAN	P06576	FALSE	4_Pre_D0
20	7.2991	8aug24_Sunkyung_G1-DIA_60spd_S3-F2_1_7168	Pre_D0	5	398	115	0	FALSE	0	ATPB_HUMAN	P06576	FALSE	5_Pre_D0
21	6.77463	8aug24_Sunkyung_C3-DIA_60spd_S3-B4_1_7142	Pre_D7_CC	1	281	69	0.4	FALSE	0	ATPB_HUMAN	P06576	FALSE	1_Pre_D7_CC
22	6.96586	8aug24_Sunkyung_D3-DIA_60spd_S3-C4_1_7149	Pre_D7_CC	2	281	70	0.391304	FALSE	0	ATPB_HUMAN	P06576	FALSE	2_Pre_D7_CC
23	6.51455	8aug24_Sunkyung_E3-DIA_60spd_S3-D4_1_7156	Pre_D7_CC	3	281	24	0.791304	TRUE	0	ATPB_HUMAN	P06576	FALSE	3_Pre_D7_CC
24	7.14822	8aug24_Sunkyung_F3-DIA_60spd_S3-E4_1_7163	Pre_D7_CC	4	281	82	0.286957	FALSE	0	ATPB_HUMAN	P06576	FALSE	4_Pre_D7_CC
25	6.55083	8aug24_Sunkyung_G3-DIA_60spd_S3-F4_1_7170	Pre_D7_CC	5	281	36	0.686957	TRUE	0	ATPB_HUMAN	P06576	FALSE	5_Pre_D7_CC
26	6.7363	8aug24_Sunkyung_C5-DIA_60spd_S3-B6_1_7144	Pre_D7_CM	1	305	60	0.478261	FALSE	0	ATPB_HUMAN	P06576	FALSE	1_Pre_D7_CM
27	6.26991	8aug24_Sunkyung_D5-DIA_60spd_S3-C6_1_7151	Pre_D7_CM	2	305	34	0.704348	TRUE	0	ATPB_HUMAN	P06576	FALSE	2_Pre_D7_CM
28	6.44348	8aug24_Sunkyung_E5-DIA_60spd_S3-D6_1_7158	Pre_D7_CM	3	305	36	0.686957	TRUE	0	ATPB_HUMAN	P06576	FALSE	3_Pre_D7_CM
29	8.06161	8aug24_Sunkyung_F5-DIA_60spd_S3-E6_1_7165	Pre_D7_CM	4	305	84	0.269565	FALSE	0	ATPB_HUMAN	P06576	FALSE	4_Pre_D7_CM
30	6.97444	8aug24_Sunkyung_G5-DIA_60spd_S3-F6_1_7172	Pre_D7_CM	5	305	91	0.208696	FALSE	0	ATPB_HUMAN	P06576	FALSE	5_Pre_D7_CM
1	6.99446	8aug24_Sunkyung_C2-DIA_60spd_S3-B3_1_7141	Post_D0	6	218	34	0.26087	FALSE	0	B2MG_HUMAN;cRAP-B2MG_HUMAN	P61769;cRAP-P61769	FALSE	6_Post_D0
2	7.02348	8aug24_Sunkyung_D2-DIA_60spd_S3-C3_1_7148	Post_D0	7	218	46	0	FALSE	0	B2MG_HUMAN;cRAP-B2MG_HUMAN	P61769;cRAP-P61769	FALSE	7_Post_D0
3	8.33554	8aug24_Sunkyung_E2-DIA_60spd_S3-D3_1_7155	Post_D0	8	218	46	0	FALSE	0	B2MG_HUMAN;cRAP-B2MG_HUMAN	P61769;cRAP-P61769	FALSE	8_Post_D0
4	8.8993	8aug24_Sunkyung_F2-DIA_60spd_S3-E3_1_7162	Post_D0	9	218	46	0	FALSE	0	B2MG_HUMAN;cRAP-B2MG_HUMAN	P61769;cRAP-P61769	FALSE	9_Post_D0
5	8.38705	8aug24_Sunkyung_G2-DIA_60spd_S3-F3_1_7169	Post_D0	10	218	46	0	FALSE	0	B2MG_HUMAN;cRAP-B2MG_HUMAN	P61769;cRAP-P61769	FALSE	10_Post_D0
6	7.18029	8aug24_Sunkyung_C4-DIA_60spd_S3-B5_1_7143	Post_D7_CC	6	72	24	0.478261	FALSE	0	B2MG_HUMAN;cRAP-B2MG_HUMAN	P61769;cRAP-P61769	FALSE	6_Post_D7_CC
7	7.20781	8aug24_Sunkyung_D4-DIA_60spd_S3-C5_1_7150	Post_D7_CC	7	72	24	0.478261	FALSE	0	B2MG_HUMAN;cRAP-B2MG_HUMAN	P61769;cRAP-P61769	FALSE	7_Post_D7_CC
8	7.47022	8aug24_Sunkyung_E4-DIA_60spd_S3-D5_1_7157	Post_D7_CC	8	72	12	0.73913	TRUE	0	B2MG_HUMAN;cRAP-B2MG_HUMAN	P61769;cRAP-P61769	FALSE	8_Post_D7_CC
9	4.8155	8aug24_Sunkyung_F4-DIA_60spd_S3-E5_1_7164	Post_D7_CC	9	72	12	0.73913	TRUE	0	B2MG_HUMAN;cRAP-B2MG_HUMAN	P61769;cRAP-P61769	FALSE	9_Post_D7_CC
11	7.39959	8aug24_Sunkyung_C6-DIA_60spd_S3-B7_1_7145	Post_D7_CM	6	154	36	0.217391	FALSE	0	B2MG_HUMAN;cRAP-B2MG_HUMAN	P61769;cRAP-P61769	FALSE	6_Post_D7_CM
12	6.70312	8aug24_Sunkyung_D6-DIA_60spd_S3-C7_1_7152	Post_D7_CM	7	154	24	0.478261	FALSE	0	B2MG_HUMAN;cRAP-B2MG_HUMAN	P61769;cRAP-P61769	FALSE	7_Post_D7_CM
13	8.26546	8aug24_Sunkyung_E6-DIA_60spd_S3-D7_1_7159	Post_D7_CM	8	154	24	0.478261	FALSE	0	B2MG_HUMAN;cRAP-B2MG_HUMAN	P61769;cRAP-P61769	FALSE	8_Post_D7_CM
14	7.77438	8aug24_Sunkyung_F6-DIA_60spd_S3-E7_1_7166	Post_D7_CM	9	154	46	0	FALSE	0	B2MG_HUMAN;cRAP-B2MG_HUMAN	P61769;cRAP-P61769	FALSE	9_Post_D7_CM
15	7.46458	8aug24_Sunkyung_G6-DIA_60spd_S3-F7_1_7173	Post_D7_CM	10	154	24	0.478261	FALSE	0	B2MG_HUMAN;cRAP-B2MG_HUMAN	P61769;cRAP-P61769	FALSE	10_Post_D7_CM
16	7.43678	8aug24_Sunkyung_C1b-DIA_60spd_S3-B2_1_7140	Pre_D0	1	142	24	0.478261	FALSE	0	B2MG_HUMAN;cRAP-B2MG_HUMAN	P61769;cRAP-P61769	FALSE	1_Pre_D0
17	8.26801	8aug24_Sunkyung_D1-DIA_60spd_S3-C2_1_7147	Pre_D0	2	142	36	0.217391	FALSE	0	B2MG_HUMAN;cRAP-B2MG_HUMAN	P61769;cRAP-P61769	FALSE	2_Pre_D0
18	7.81579	8aug24_Sunkyung_E1-DIA_60spd_S3-D2_1_7154	Pre_D0	3	142	24	0.478261	FALSE	0	B2MG_HUMAN;cRAP-B2MG_HUMAN	P61769;cRAP-P61769	FALSE	3_Pre_D0
19	7.95759	8aug24_Sunkyung_F1-DIA_60spd_S3-E2_1_7161	Pre_D0	4	142	34	0.26087	FALSE	0	B2MG_HUMAN;cRAP-B2MG_HUMAN	P61769;cRAP-P61769	FALSE	4_Pre_D0
20	7.44856	8aug24_Sunkyung_G1-DIA_60spd_S3-F2_1_7168	Pre_D0	5	142	24	0.478261	FALSE	0	B2MG_HUMAN;cRAP-B2MG_HUMAN	P61769;cRAP-P61769	FALSE	5_Pre_D0
21	7.20933	8aug24_Sunkyung_C3-DIA_60spd_S3-B4_1_7142	Pre_D7_CC	1	96	24	0.478261	FALSE	0	B2MG_HUMAN;cRAP-B2MG_HUMAN	P61769;cRAP-P61769	FALSE	1_Pre_D7_CC
22	6.84389	8aug24_Sunkyung_D3-DIA_60spd_S3-C4_1_7149	Pre_D7_CC	2	96	24	0.478261	FALSE	0	B2MG_HUMAN;cRAP-B2MG_HUMAN	P61769;cRAP-P61769	FALSE	2_Pre_D7_CC
23	5.76621	8aug24_Sunkyung_E3-DIA_60spd_S3-D4_1_7156	Pre_D7_CC	3	96	24	0.478261	FALSE	0	B2MG_HUMAN;cRAP-B2MG_HUMAN	P61769;cRAP-P61769	FALSE	3_Pre_D7_CC
24	5.9188	8aug24_Sunkyung_F3-DIA_60spd_S3-E4_1_7163	Pre_D7_CC	4	96	12	0.73913	TRUE	0	B2MG_HUMAN;cRAP-B2MG_HUMAN	P61769;cRAP-P61769	FALSE	4_Pre_D7_CC
25	4.9506	8aug24_Sunkyung_G3-DIA_60spd_S3-F4_1_7170	Pre_D7_CC	5	96	12	0.73913	TRUE	0	B2MG_HUMAN;cRAP-B2MG_HUMAN	P61769;cRAP-P61769	FALSE	5_Pre_D7_CC
26	7.57013	8aug24_Sunkyung_C5-DIA_60spd_S3-B6_1_7144	Pre_D7_CM	1	184	46	0	FALSE	0	B2MG_HUMAN;cRAP-B2MG_HUMAN	P61769;cRAP-P61769	FALSE	1_Pre_D7_CM
27	6.71834	8aug24_Sunkyung_D5-DIA_60spd_S3-C6_1_7151	Pre_D7_CM	2	184	12	0.73913	TRUE	0	B2MG_HUMAN;cRAP-B2MG_HUMAN	P61769;cRAP-P61769	FALSE	2_Pre_D7_CM
28	8.35547	8aug24_Sunkyung_E5-DIA_60spd_S3-D6_1_7158	Pre_D7_CM	3	184	46	0	FALSE	0	B2MG_HUMAN;cRAP-B2MG_HUMAN	P61769;cRAP-P61769	FALSE	3_Pre_D7_CM
29	7.96152	8aug24_Sunkyung_F5-DIA_60spd_S3-E6_1_7165	Pre_D7_CM	4	184	46	0	FALSE	0	B2MG_HUMAN;cRAP-B2MG_HUMAN	P61769;cRAP-P61769	FALSE	4_Pre_D7_CM
30	6.88195	8aug24_Sunkyung_G5-DIA_60spd_S3-F6_1_7172	Pre_D7_CM	5	184	34	0.26087	FALSE	0	B2MG_HUMAN;cRAP-B2MG_HUMAN	P61769;cRAP-P61769	FALSE	5_Pre_D7_CM
3	7.37696	8aug24_Sunkyung_E2-DIA_60spd_S3-D3_1_7155	Post_D0	8	27	16	0	FALSE	0	BASI_HUMAN	P35613	FALSE	8_Post_D0
4	6.28167	8aug24_Sunkyung_F2-DIA_60spd_S3-E3_1_7162	Post_D0	9	27	11	0.3125	FALSE	0	BASI_HUMAN	P35613	FALSE	9_Post_D0
6	6.79492	8aug24_Sunkyung_C4-DIA_60spd_S3-B5_1_7143	Post_D7_CC	6	27	16	0	FALSE	0	BASI_HUMAN	P35613	FALSE	6_Post_D7_CC
8	7.72706	8aug24_Sunkyung_E4-DIA_60spd_S3-D5_1_7157	Post_D7_CC	8	27	11	0.3125	FALSE	0	BASI_HUMAN	P35613	FALSE	8_Post_D7_CC
12	6.57889	8aug24_Sunkyung_D6-DIA_60spd_S3-C7_1_7152	Post_D7_CM	7	38	16	0	FALSE	0	BASI_HUMAN	P35613	FALSE	7_Post_D7_CM
14	7.92472	8aug24_Sunkyung_F6-DIA_60spd_S3-E7_1_7166	Post_D7_CM	9	38	11	0.3125	FALSE	0	BASI_HUMAN	P35613	FALSE	9_Post_D7_CM
15	6.48433	8aug24_Sunkyung_G6-DIA_60spd_S3-F7_1_7173	Post_D7_CM	10	38	11	0.3125	FALSE	0	BASI_HUMAN	P35613	FALSE	10_Post_D7_CM
16	7.63915	8aug24_Sunkyung_C1b-DIA_60spd_S3-B2_1_7140	Pre_D0	1	38	11	0.3125	FALSE	0	BASI_HUMAN	P35613	FALSE	1_Pre_D0
17	6.63975	8aug24_Sunkyung_D1-DIA_60spd_S3-C2_1_7147	Pre_D0	2	38	11	0.3125	FALSE	0	BASI_HUMAN	P35613	FALSE	2_Pre_D0
20	7.19904	8aug24_Sunkyung_G1-DIA_60spd_S3-F2_1_7168	Pre_D0	5	38	16	0	FALSE	0	BASI_HUMAN	P35613	FALSE	5_Pre_D0
21	7.25146	8aug24_Sunkyung_C3-DIA_60spd_S3-B4_1_7142	Pre_D7_CC	1	16	11	0.3125	FALSE	0	BASI_HUMAN	P35613	FALSE	1_Pre_D7_CC
22	7.38215	8aug24_Sunkyung_D3-DIA_60spd_S3-C4_1_7149	Pre_D7_CC	2	16	5	0.6875	TRUE	0	BASI_HUMAN	P35613	FALSE	2_Pre_D7_CC
26	6.57508	8aug24_Sunkyung_C5-DIA_60spd_S3-B6_1_7144	Pre_D7_CM	1	33	11	0.3125	FALSE	0	BASI_HUMAN	P35613	FALSE	1_Pre_D7_CM
29	7.59571	8aug24_Sunkyung_F5-DIA_60spd_S3-E6_1_7165	Pre_D7_CM	4	33	11	0.3125	FALSE	0	BASI_HUMAN	P35613	FALSE	4_Pre_D7_CM
30	6.89567	8aug24_Sunkyung_G5-DIA_60spd_S3-F6_1_7172	Pre_D7_CM	5	33	11	0.3125	FALSE	0	BASI_HUMAN	P35613	FALSE	5_Pre_D7_CM
2	8.10634	8aug24_Sunkyung_D2-DIA_60spd_S3-C3_1_7148	Post_D0	7	40	12	0.25	FALSE	0	BGAL_HUMAN	P16278	FALSE	7_Post_D0
3	8.10085	8aug24_Sunkyung_E2-DIA_60spd_S3-D3_1_7155	Post_D0	8	40	16	0	FALSE	0	BGAL_HUMAN	P16278	FALSE	8_Post_D0
4	7.77982	8aug24_Sunkyung_F2-DIA_60spd_S3-E3_1_7162	Post_D0	9	40	12	0.25	FALSE	0	BGAL_HUMAN	P16278	FALSE	9_Post_D0
10	7.36453	8aug24_Sunkyung_G4-DIA_60spd_S3-F5_1_7171	Post_D7_CC	10	12	12	0.25	FALSE	0	BGAL_HUMAN	P16278	FALSE	10_Post_D7_CC
14	7.61699	8aug24_Sunkyung_F6-DIA_60spd_S3-E7_1_7166	Post_D7_CM	9	12	12	0.25	FALSE	0	BGAL_HUMAN	P16278	FALSE	9_Post_D7_CM
16	7.85409	8aug24_Sunkyung_C1b-DIA_60spd_S3-B2_1_7140	Pre_D0	1	56	12	0.25	FALSE	0	BGAL_HUMAN	P16278	FALSE	1_Pre_D0
17	7.70047	8aug24_Sunkyung_D1-DIA_60spd_S3-C2_1_7147	Pre_D0	2	56	16	0	FALSE	0	BGAL_HUMAN	P16278	FALSE	2_Pre_D0
18	7.71005	8aug24_Sunkyung_E1-DIA_60spd_S3-D2_1_7154	Pre_D0	3	56	12	0.25	FALSE	0	BGAL_HUMAN	P16278	FALSE	3_Pre_D0
20	7.81587	8aug24_Sunkyung_G1-DIA_60spd_S3-F2_1_7168	Pre_D0	5	56	16	0	FALSE	0	BGAL_HUMAN	P16278	FALSE	5_Pre_D0
21	7.232	8aug24_Sunkyung_C3-DIA_60spd_S3-B4_1_7142	Pre_D7_CC	1	12	12	0.25	FALSE	0	BGAL_HUMAN	P16278	FALSE	1_Pre_D7_CC
29	7.72553	8aug24_Sunkyung_F5-DIA_60spd_S3-E6_1_7165	Pre_D7_CM	4	12	12	0.25	FALSE	0	BGAL_HUMAN	P16278	FALSE	4_Pre_D7_CM
1	7.46207	8aug24_Sunkyung_C2-DIA_60spd_S3-B3_1_7141	Post_D0	6	726	106	0.495238	FALSE	0	BGH3_HUMAN	Q15582	FALSE	6_Post_D0
2	7.0221	8aug24_Sunkyung_D2-DIA_60spd_S3-C3_1_7148	Post_D0	7	726	94	0.552381	TRUE	0	BGH3_HUMAN	Q15582	FALSE	7_Post_D0
3	7.9246	8aug24_Sunkyung_E2-DIA_60spd_S3-D3_1_7155	Post_D0	8	726	210	0	FALSE	0	BGH3_HUMAN	Q15582	FALSE	8_Post_D0
4	8.19214	8aug24_Sunkyung_F2-DIA_60spd_S3-E3_1_7162	Post_D0	9	726	210	0	FALSE	0	BGH3_HUMAN	Q15582	FALSE	9_Post_D0
5	6.3793	8aug24_Sunkyung_G2-DIA_60spd_S3-F3_1_7169	Post_D0	10	726	106	0.495238	FALSE	0	BGH3_HUMAN	Q15582	FALSE	10_Post_D0
6	8.63005	8aug24_Sunkyung_C4-DIA_60spd_S3-B5_1_7143	Post_D7_CC	6	528	198	0.0571429	FALSE	0	BGH3_HUMAN	Q15582	FALSE	6_Post_D7_CC
7	7.03684	8aug24_Sunkyung_D4-DIA_60spd_S3-C5_1_7150	Post_D7_CC	7	528	71	0.661905	TRUE	0	BGH3_HUMAN	Q15582	FALSE	7_Post_D7_CC
8	7.08781	8aug24_Sunkyung_E4-DIA_60spd_S3-D5_1_7157	Post_D7_CC	8	528	71	0.661905	TRUE	0	BGH3_HUMAN	Q15582	FALSE	8_Post_D7_CC
9	6.89673	8aug24_Sunkyung_F4-DIA_60spd_S3-E5_1_7164	Post_D7_CC	9	528	107	0.490476	FALSE	0	BGH3_HUMAN	Q15582	FALSE	9_Post_D7_CC
10	7.23694	8aug24_Sunkyung_G4-DIA_60spd_S3-F5_1_7171	Post_D7_CC	10	528	81	0.614286	TRUE	0	BGH3_HUMAN	Q15582	FALSE	10_Post_D7_CC
11	7.24886	8aug24_Sunkyung_C6-DIA_60spd_S3-B7_1_7145	Post_D7_CM	6	765	141	0.328571	FALSE	0	BGH3_HUMAN	Q15582	FALSE	6_Post_D7_CM
12	7.81183	8aug24_Sunkyung_D6-DIA_60spd_S3-C7_1_7152	Post_D7_CM	7	765	198	0.0571429	FALSE	0	BGH3_HUMAN	Q15582	FALSE	7_Post_D7_CM
13	7.51423	8aug24_Sunkyung_E6-DIA_60spd_S3-D7_1_7159	Post_D7_CM	8	765	154	0.266667	FALSE	0	BGH3_HUMAN	Q15582	FALSE	8_Post_D7_CM
14	7.56621	8aug24_Sunkyung_F6-DIA_60spd_S3-E7_1_7166	Post_D7_CM	9	765	178	0.152381	FALSE	0	BGH3_HUMAN	Q15582	FALSE	9_Post_D7_CM
15	7.18196	8aug24_Sunkyung_G6-DIA_60spd_S3-F7_1_7173	Post_D7_CM	10	765	94	0.552381	TRUE	0	BGH3_HUMAN	Q15582	FALSE	10_Post_D7_CM
16	8.17189	8aug24_Sunkyung_C1b-DIA_60spd_S3-B2_1_7140	Pre_D0	1	725	198	0.0571429	FALSE	0	BGH3_HUMAN	Q15582	FALSE	1_Pre_D0
17	7.91582	8aug24_Sunkyung_D1-DIA_60spd_S3-C2_1_7147	Pre_D0	2	725	186	0.114286	FALSE	0	BGH3_HUMAN	Q15582	FALSE	2_Pre_D0
18	7.02019	8aug24_Sunkyung_E1-DIA_60spd_S3-D2_1_7154	Pre_D0	3	725	93	0.557143	TRUE	0	BGH3_HUMAN	Q15582	FALSE	3_Pre_D0
19	7.4027	8aug24_Sunkyung_F1-DIA_60spd_S3-E2_1_7161	Pre_D0	4	725	94	0.552381	TRUE	0	BGH3_HUMAN	Q15582	FALSE	4_Pre_D0
20	7.16524	8aug24_Sunkyung_G1-DIA_60spd_S3-F2_1_7168	Pre_D0	5	725	154	0.266667	FALSE	0	BGH3_HUMAN	Q15582	FALSE	5_Pre_D0
21	8.23717	8aug24_Sunkyung_C3-DIA_60spd_S3-B4_1_7142	Pre_D7_CC	1	473	201	0.0428571	FALSE	0	BGH3_HUMAN	Q15582	FALSE	1_Pre_D7_CC
22	7.1811	8aug24_Sunkyung_D3-DIA_60spd_S3-C4_1_7149	Pre_D7_CC	2	473	95	0.547619	TRUE	0	BGH3_HUMAN	Q15582	FALSE	2_Pre_D7_CC
23	5.37498	8aug24_Sunkyung_E3-DIA_60spd_S3-D4_1_7156	Pre_D7_CC	3	473	35	0.833333	TRUE	0	BGH3_HUMAN	Q15582	FALSE	3_Pre_D7_CC
24	7.11124	8aug24_Sunkyung_F3-DIA_60spd_S3-E4_1_7163	Pre_D7_CC	4	473	71	0.661905	TRUE	0	BGH3_HUMAN	Q15582	FALSE	4_Pre_D7_CC
25	6.66679	8aug24_Sunkyung_G3-DIA_60spd_S3-F4_1_7170	Pre_D7_CC	5	473	71	0.661905	TRUE	0	BGH3_HUMAN	Q15582	FALSE	5_Pre_D7_CC
26	8.17075	8aug24_Sunkyung_C5-DIA_60spd_S3-B6_1_7144	Pre_D7_CM	1	669	210	0	FALSE	0	BGH3_HUMAN	Q15582	FALSE	1_Pre_D7_CM
27	6.64144	8aug24_Sunkyung_D5-DIA_60spd_S3-C6_1_7151	Pre_D7_CM	2	669	35	0.833333	TRUE	0	BGH3_HUMAN	Q15582	FALSE	2_Pre_D7_CM
28	6.78356	8aug24_Sunkyung_E5-DIA_60spd_S3-D6_1_7158	Pre_D7_CM	3	669	92	0.561905	TRUE	0	BGH3_HUMAN	Q15582	FALSE	3_Pre_D7_CM
29	7.76114	8aug24_Sunkyung_F5-DIA_60spd_S3-E6_1_7165	Pre_D7_CM	4	669	177	0.157143	FALSE	0	BGH3_HUMAN	Q15582	FALSE	4_Pre_D7_CM
30	7.1811	8aug24_Sunkyung_G5-DIA_60spd_S3-F6_1_7172	Pre_D7_CM	5	669	155	0.261905	FALSE	0	BGH3_HUMAN	Q15582	FALSE	5_Pre_D7_CM
2	5.82324	8aug24_Sunkyung_D2-DIA_60spd_S3-C3_1_7148	Post_D0	7	32	11	0.47619	FALSE	0	BIEA_HUMAN	P53004	FALSE	7_Post_D0
3	6.45254	8aug24_Sunkyung_E2-DIA_60spd_S3-D3_1_7155	Post_D0	8	32	11	0.47619	FALSE	0	BIEA_HUMAN	P53004	FALSE	8_Post_D0
4	8.02398	8aug24_Sunkyung_F2-DIA_60spd_S3-E3_1_7162	Post_D0	9	32	10	0.52381	TRUE	0	BIEA_HUMAN	P53004	FALSE	9_Post_D0
9	7.11824	8aug24_Sunkyung_F4-DIA_60spd_S3-E5_1_7164	Post_D7_CC	9	11	11	0.47619	FALSE	0	BIEA_HUMAN	P53004	FALSE	9_Post_D7_CC
12	7.53662	8aug24_Sunkyung_D6-DIA_60spd_S3-C7_1_7152	Post_D7_CM	7	63	21	0	FALSE	0	BIEA_HUMAN	P53004	FALSE	7_Post_D7_CM
13	7.4871	8aug24_Sunkyung_E6-DIA_60spd_S3-D7_1_7159	Post_D7_CM	8	63	21	0	FALSE	0	BIEA_HUMAN	P53004	FALSE	8_Post_D7_CM
14	7.06884	8aug24_Sunkyung_F6-DIA_60spd_S3-E7_1_7166	Post_D7_CM	9	63	21	0	FALSE	0	BIEA_HUMAN	P53004	FALSE	9_Post_D7_CM
16	7.74658	8aug24_Sunkyung_C1b-DIA_60spd_S3-B2_1_7140	Pre_D0	1	73	21	0	FALSE	0	BIEA_HUMAN	P53004	FALSE	1_Pre_D0
17	4.15358	8aug24_Sunkyung_D1-DIA_60spd_S3-C2_1_7147	Pre_D0	2	73	10	0.52381	TRUE	0	BIEA_HUMAN	P53004	FALSE	2_Pre_D0
18	7.85494	8aug24_Sunkyung_E1-DIA_60spd_S3-D2_1_7154	Pre_D0	3	73	21	0	FALSE	0	BIEA_HUMAN	P53004	FALSE	3_Pre_D0
20	7.56414	8aug24_Sunkyung_G1-DIA_60spd_S3-F2_1_7168	Pre_D0	5	73	21	0	FALSE	0	BIEA_HUMAN	P53004	FALSE	5_Pre_D0
25	2.30395	8aug24_Sunkyung_G3-DIA_60spd_S3-F4_1_7170	Pre_D7_CC	5	10	10	0.52381	TRUE	0	BIEA_HUMAN	P53004	FALSE	5_Pre_D7_CC
26	5.61039	8aug24_Sunkyung_C5-DIA_60spd_S3-B6_1_7144	Pre_D7_CM	1	53	11	0.47619	FALSE	0	BIEA_HUMAN	P53004	FALSE	1_Pre_D7_CM
28	6.26218	8aug24_Sunkyung_E5-DIA_60spd_S3-D6_1_7158	Pre_D7_CM	3	53	10	0.52381	TRUE	0	BIEA_HUMAN	P53004	FALSE	3_Pre_D7_CM
29	7.14177	8aug24_Sunkyung_F5-DIA_60spd_S3-E6_1_7165	Pre_D7_CM	4	53	21	0	FALSE	0	BIEA_HUMAN	P53004	FALSE	4_Pre_D7_CM
30	7.93762	8aug24_Sunkyung_G5-DIA_60spd_S3-F6_1_7172	Pre_D7_CM	5	53	11	0.47619	FALSE	0	BIEA_HUMAN	P53004	FALSE	5_Pre_D7_CM
1	5.9655	8aug24_Sunkyung_C2-DIA_60spd_S3-B3_1_7141	Post_D0	6	48	12	0.478261	FALSE	0	BLMH_HUMAN	Q13867	FALSE	6_Post_D0
2	6.84846	8aug24_Sunkyung_D2-DIA_60spd_S3-C3_1_7148	Post_D0	7	48	12	0.478261	FALSE	0	BLMH_HUMAN	Q13867	FALSE	7_Post_D0
3	5.52211	8aug24_Sunkyung_E2-DIA_60spd_S3-D3_1_7155	Post_D0	8	48	12	0.478261	FALSE	0	BLMH_HUMAN	Q13867	FALSE	8_Post_D0
5	5.09221	8aug24_Sunkyung_G2-DIA_60spd_S3-F3_1_7169	Post_D0	10	48	12	0.478261	FALSE	0	BLMH_HUMAN	Q13867	FALSE	10_Post_D0
6	5.60145	8aug24_Sunkyung_C4-DIA_60spd_S3-B5_1_7143	Post_D7_CC	6	38	12	0.478261	FALSE	0	BLMH_HUMAN	Q13867	FALSE	6_Post_D7_CC
7	8.26304	8aug24_Sunkyung_D4-DIA_60spd_S3-C5_1_7150	Post_D7_CC	7	38	14	0.391304	FALSE	0	BLMH_HUMAN	Q13867	FALSE	7_Post_D7_CC
8	5.56947	8aug24_Sunkyung_E4-DIA_60spd_S3-D5_1_7157	Post_D7_CC	8	38	12	0.478261	FALSE	0	BLMH_HUMAN	Q13867	FALSE	8_Post_D7_CC
11	7.93587	8aug24_Sunkyung_C6-DIA_60spd_S3-B7_1_7145	Post_D7_CM	6	73	14	0.391304	FALSE	0	BLMH_HUMAN	Q13867	FALSE	6_Post_D7_CM
12	9.74081	8aug24_Sunkyung_D6-DIA_60spd_S3-C7_1_7152	Post_D7_CM	7	73	23	0	FALSE	0	BLMH_HUMAN	Q13867	FALSE	7_Post_D7_CM
13	7.15499	8aug24_Sunkyung_E6-DIA_60spd_S3-D7_1_7159	Post_D7_CM	8	73	12	0.478261	FALSE	0	BLMH_HUMAN	Q13867	FALSE	8_Post_D7_CM
14	7.55897	8aug24_Sunkyung_F6-DIA_60spd_S3-E7_1_7166	Post_D7_CM	9	73	12	0.478261	FALSE	0	BLMH_HUMAN	Q13867	FALSE	9_Post_D7_CM
15	4.33664	8aug24_Sunkyung_G6-DIA_60spd_S3-F7_1_7173	Post_D7_CM	10	73	12	0.478261	FALSE	0	BLMH_HUMAN	Q13867	FALSE	10_Post_D7_CM
17	7.05774	8aug24_Sunkyung_D1-DIA_60spd_S3-C2_1_7147	Pre_D0	2	33	21	0.0869565	FALSE	0	BLMH_HUMAN	Q13867	FALSE	2_Pre_D0
18	6.09569	8aug24_Sunkyung_E1-DIA_60spd_S3-D2_1_7154	Pre_D0	3	33	12	0.478261	FALSE	0	BLMH_HUMAN	Q13867	FALSE	3_Pre_D0
21	6.83566	8aug24_Sunkyung_C3-DIA_60spd_S3-B4_1_7142	Pre_D7_CC	1	69	21	0.0869565	FALSE	0	BLMH_HUMAN	Q13867	FALSE	1_Pre_D7_CC
22	6.14303	8aug24_Sunkyung_D3-DIA_60spd_S3-C4_1_7149	Pre_D7_CC	2	69	12	0.478261	FALSE	0	BLMH_HUMAN	Q13867	FALSE	2_Pre_D7_CC
23	5.72887	8aug24_Sunkyung_E3-DIA_60spd_S3-D4_1_7156	Pre_D7_CC	3	69	12	0.478261	FALSE	0	BLMH_HUMAN	Q13867	FALSE	3_Pre_D7_CC
24	4.49101	8aug24_Sunkyung_F3-DIA_60spd_S3-E4_1_7163	Pre_D7_CC	4	69	12	0.478261	FALSE	0	BLMH_HUMAN	Q13867	FALSE	4_Pre_D7_CC
25	6.74124	8aug24_Sunkyung_G3-DIA_60spd_S3-F4_1_7170	Pre_D7_CC	5	69	12	0.478261	FALSE	0	BLMH_HUMAN	Q13867	FALSE	5_Pre_D7_CC
26	6.18997	8aug24_Sunkyung_C5-DIA_60spd_S3-B6_1_7144	Pre_D7_CM	1	57	21	0.0869565	FALSE	0	BLMH_HUMAN	Q13867	FALSE	1_Pre_D7_CM
27	6.914	8aug24_Sunkyung_D5-DIA_60spd_S3-C6_1_7151	Pre_D7_CM	2	57	12	0.478261	FALSE	0	BLMH_HUMAN	Q13867	FALSE	2_Pre_D7_CM
28	4.79904	8aug24_Sunkyung_E5-DIA_60spd_S3-D6_1_7158	Pre_D7_CM	3	57	12	0.478261	FALSE	0	BLMH_HUMAN	Q13867	FALSE	3_Pre_D7_CM
29	6.48617	8aug24_Sunkyung_F5-DIA_60spd_S3-E6_1_7165	Pre_D7_CM	4	57	12	0.478261	FALSE	0	BLMH_HUMAN	Q13867	FALSE	4_Pre_D7_CM
2	7.00667	8aug24_Sunkyung_D2-DIA_60spd_S3-C3_1_7148	Post_D0	7	48	12	0.5	TRUE	0	BLVRB_HUMAN	P30043	FALSE	7_Post_D0
3	7.64168	8aug24_Sunkyung_E2-DIA_60spd_S3-D3_1_7155	Post_D0	8	48	12	0.5	TRUE	0	BLVRB_HUMAN	P30043	FALSE	8_Post_D0
4	6.67854	8aug24_Sunkyung_F2-DIA_60spd_S3-E3_1_7162	Post_D0	9	48	24	0	FALSE	0	BLVRB_HUMAN	P30043	FALSE	9_Post_D0
8	6.63654	8aug24_Sunkyung_E4-DIA_60spd_S3-D5_1_7157	Post_D7_CC	8	12	12	0.5	TRUE	0	BLVRB_HUMAN	P30043	FALSE	8_Post_D7_CC
12	6.43767	8aug24_Sunkyung_D6-DIA_60spd_S3-C7_1_7152	Post_D7_CM	7	48	24	0	FALSE	0	BLVRB_HUMAN	P30043	FALSE	7_Post_D7_CM
14	7.79364	8aug24_Sunkyung_F6-DIA_60spd_S3-E7_1_7166	Post_D7_CM	9	48	12	0.5	TRUE	0	BLVRB_HUMAN	P30043	FALSE	9_Post_D7_CM
15	6.85744	8aug24_Sunkyung_G6-DIA_60spd_S3-F7_1_7173	Post_D7_CM	10	48	12	0.5	TRUE	0	BLVRB_HUMAN	P30043	FALSE	10_Post_D7_CM
16	7.21174	8aug24_Sunkyung_C1b-DIA_60spd_S3-B2_1_7140	Pre_D0	1	96	24	0	FALSE	0	BLVRB_HUMAN	P30043	FALSE	1_Pre_D0
17	6.79372	8aug24_Sunkyung_D1-DIA_60spd_S3-C2_1_7147	Pre_D0	2	96	12	0.5	TRUE	0	BLVRB_HUMAN	P30043	FALSE	2_Pre_D0
18	7.61997	8aug24_Sunkyung_E1-DIA_60spd_S3-D2_1_7154	Pre_D0	3	96	24	0	FALSE	0	BLVRB_HUMAN	P30043	FALSE	3_Pre_D0
19	7.27251	8aug24_Sunkyung_F1-DIA_60spd_S3-E2_1_7161	Pre_D0	4	96	12	0.5	TRUE	0	BLVRB_HUMAN	P30043	FALSE	4_Pre_D0
20	7.99727	8aug24_Sunkyung_G1-DIA_60spd_S3-F2_1_7168	Pre_D0	5	96	24	0	FALSE	0	BLVRB_HUMAN	P30043	FALSE	5_Pre_D0
21	6.69804	8aug24_Sunkyung_C3-DIA_60spd_S3-B4_1_7142	Pre_D7_CC	1	60	24	0	FALSE	0	BLVRB_HUMAN	P30043	FALSE	1_Pre_D7_CC
22	7.0199	8aug24_Sunkyung_D3-DIA_60spd_S3-C4_1_7149	Pre_D7_CC	2	60	24	0	FALSE	0	BLVRB_HUMAN	P30043	FALSE	2_Pre_D7_CC
24	7.48246	8aug24_Sunkyung_F3-DIA_60spd_S3-E4_1_7163	Pre_D7_CC	4	60	12	0.5	TRUE	0	BLVRB_HUMAN	P30043	FALSE	4_Pre_D7_CC
29	7.06475	8aug24_Sunkyung_F5-DIA_60spd_S3-E6_1_7165	Pre_D7_CM	4	48	24	0	FALSE	0	BLVRB_HUMAN	P30043	FALSE	4_Pre_D7_CM
30	7.07894	8aug24_Sunkyung_G5-DIA_60spd_S3-F6_1_7172	Pre_D7_CM	5	48	24	0	FALSE	0	BLVRB_HUMAN	P30043	FALSE	5_Pre_D7_CM
3	7.25102	8aug24_Sunkyung_E2-DIA_60spd_S3-D3_1_7155	Post_D0	8	46	23	0	FALSE	0	BMP1_HUMAN	P13497	FALSE	8_Post_D0
4	8.41281	8aug24_Sunkyung_F2-DIA_60spd_S3-E3_1_7162	Post_D0	9	46	23	0	FALSE	0	BMP1_HUMAN	P13497	FALSE	9_Post_D0
6	7.07177	8aug24_Sunkyung_C4-DIA_60spd_S3-B5_1_7143	Post_D7_CC	6	23	23	0	FALSE	0	BMP1_HUMAN	P13497	FALSE	6_Post_D7_CC
12	5.91298	8aug24_Sunkyung_D6-DIA_60spd_S3-C7_1_7152	Post_D7_CM	7	35	12	0.478261	FALSE	0	BMP1_HUMAN	P13497	FALSE	7_Post_D7_CM
14	7.65556	8aug24_Sunkyung_F6-DIA_60spd_S3-E7_1_7166	Post_D7_CM	9	35	12	0.478261	FALSE	0	BMP1_HUMAN	P13497	FALSE	9_Post_D7_CM
15	6.8036	8aug24_Sunkyung_G6-DIA_60spd_S3-F7_1_7173	Post_D7_CM	10	35	11	0.521739	TRUE	0	BMP1_HUMAN	P13497	FALSE	10_Post_D7_CM
16	7.4675	8aug24_Sunkyung_C1b-DIA_60spd_S3-B2_1_7140	Pre_D0	1	58	23	0	FALSE	0	BMP1_HUMAN	P13497	FALSE	1_Pre_D0
17	7.14408	8aug24_Sunkyung_D1-DIA_60spd_S3-C2_1_7147	Pre_D0	2	58	23	0	FALSE	0	BMP1_HUMAN	P13497	FALSE	2_Pre_D0
18	6.34971	8aug24_Sunkyung_E1-DIA_60spd_S3-D2_1_7154	Pre_D0	3	58	12	0.478261	FALSE	0	BMP1_HUMAN	P13497	FALSE	3_Pre_D0
21	7.34166	8aug24_Sunkyung_C3-DIA_60spd_S3-B4_1_7142	Pre_D7_CC	1	23	23	0	FALSE	0	BMP1_HUMAN	P13497	FALSE	1_Pre_D7_CC
26	7.81877	8aug24_Sunkyung_C5-DIA_60spd_S3-B6_1_7144	Pre_D7_CM	1	47	12	0.478261	FALSE	0	BMP1_HUMAN	P13497	FALSE	1_Pre_D7_CM
29	7.12712	8aug24_Sunkyung_F5-DIA_60spd_S3-E6_1_7165	Pre_D7_CM	4	47	12	0.478261	FALSE	0	BMP1_HUMAN	P13497	FALSE	4_Pre_D7_CM
30	6.8036	8aug24_Sunkyung_G5-DIA_60spd_S3-F6_1_7172	Pre_D7_CM	5	47	23	0	FALSE	0	BMP1_HUMAN	P13497	FALSE	5_Pre_D7_CM
1	6.88209	8aug24_Sunkyung_C2-DIA_60spd_S3-B3_1_7141	Post_D0	6	382	23	0.767677	TRUE	0	C1R_HUMAN	P00736	FALSE	6_Post_D0
2	8.53225	8aug24_Sunkyung_D2-DIA_60spd_S3-C3_1_7148	Post_D0	7	382	82	0.171717	FALSE	0	C1R_HUMAN	P00736	FALSE	7_Post_D0
3	7.86816	8aug24_Sunkyung_E2-DIA_60spd_S3-D3_1_7155	Post_D0	8	382	88	0.111111	FALSE	0	C1R_HUMAN	P00736	FALSE	8_Post_D0
4	8.7149	8aug24_Sunkyung_F2-DIA_60spd_S3-E3_1_7162	Post_D0	9	382	90	0.0909091	FALSE	0	C1R_HUMAN	P00736	FALSE	9_Post_D0
5	8.03909	8aug24_Sunkyung_G2-DIA_60spd_S3-F3_1_7169	Post_D0	10	382	99	0	FALSE	0	C1R_HUMAN	P00736	FALSE	10_Post_D0
6	7.11605	8aug24_Sunkyung_C4-DIA_60spd_S3-B5_1_7143	Post_D7_CC	6	192	44	0.555556	TRUE	0	C1R_HUMAN	P00736	FALSE	6_Post_D7_CC
7	7.0669	8aug24_Sunkyung_D4-DIA_60spd_S3-C5_1_7150	Post_D7_CC	7	192	68	0.313131	FALSE	0	C1R_HUMAN	P00736	FALSE	7_Post_D7_CC
8	7.61325	8aug24_Sunkyung_E4-DIA_60spd_S3-D5_1_7157	Post_D7_CC	8	192	68	0.313131	FALSE	0	C1R_HUMAN	P00736	FALSE	8_Post_D7_CC
9	6.37299	8aug24_Sunkyung_F4-DIA_60spd_S3-E5_1_7164	Post_D7_CC	9	192	12	0.878788	TRUE	0	C1R_HUMAN	P00736	FALSE	9_Post_D7_CC
11	7.86291	8aug24_Sunkyung_C6-DIA_60spd_S3-B7_1_7145	Post_D7_CM	6	346	99	0	FALSE	0	C1R_HUMAN	P00736	FALSE	6_Post_D7_CM
12	6.46972	8aug24_Sunkyung_D6-DIA_60spd_S3-C7_1_7152	Post_D7_CM	7	346	67	0.323232	FALSE	0	C1R_HUMAN	P00736	FALSE	7_Post_D7_CM
13	7.65062	8aug24_Sunkyung_E6-DIA_60spd_S3-D7_1_7159	Post_D7_CM	8	346	68	0.313131	FALSE	0	C1R_HUMAN	P00736	FALSE	8_Post_D7_CM
14	6.88804	8aug24_Sunkyung_F6-DIA_60spd_S3-E7_1_7166	Post_D7_CM	9	346	80	0.191919	FALSE	0	C1R_HUMAN	P00736	FALSE	9_Post_D7_CM
15	6.77609	8aug24_Sunkyung_G6-DIA_60spd_S3-F7_1_7173	Post_D7_CM	10	346	32	0.676768	TRUE	0	C1R_HUMAN	P00736	FALSE	10_Post_D7_CM
16	6.92923	8aug24_Sunkyung_C1b-DIA_60spd_S3-B2_1_7140	Pre_D0	1	299	55	0.444444	FALSE	0	C1R_HUMAN	P00736	FALSE	1_Pre_D0
17	8.61801	8aug24_Sunkyung_D1-DIA_60spd_S3-C2_1_7147	Pre_D0	2	299	82	0.171717	FALSE	0	C1R_HUMAN	P00736	FALSE	2_Pre_D0
18	8.48808	8aug24_Sunkyung_E1-DIA_60spd_S3-D2_1_7154	Pre_D0	3	299	82	0.171717	FALSE	0	C1R_HUMAN	P00736	FALSE	3_Pre_D0
19	7.48469	8aug24_Sunkyung_F1-DIA_60spd_S3-E2_1_7161	Pre_D0	4	299	56	0.434343	FALSE	0	C1R_HUMAN	P00736	FALSE	4_Pre_D0
20	5.47539	8aug24_Sunkyung_G1-DIA_60spd_S3-F2_1_7168	Pre_D0	5	299	24	0.757576	TRUE	0	C1R_HUMAN	P00736	FALSE	5_Pre_D0
21	7.75858	8aug24_Sunkyung_C3-DIA_60spd_S3-B4_1_7142	Pre_D7_CC	1	230	80	0.191919	FALSE	0	C1R_HUMAN	P00736	FALSE	1_Pre_D7_CC
22	7.90805	8aug24_Sunkyung_D3-DIA_60spd_S3-C4_1_7149	Pre_D7_CC	2	230	47	0.525253	TRUE	0	C1R_HUMAN	P00736	FALSE	2_Pre_D7_CC
23	7.92241	8aug24_Sunkyung_E3-DIA_60spd_S3-D4_1_7156	Pre_D7_CC	3	230	79	0.20202	FALSE	0	C1R_HUMAN	P00736	FALSE	3_Pre_D7_CC
24	6.06742	8aug24_Sunkyung_F3-DIA_60spd_S3-E4_1_7163	Pre_D7_CC	4	230	24	0.757576	TRUE	0	C1R_HUMAN	P00736	FALSE	4_Pre_D7_CC
26	8.28453	8aug24_Sunkyung_C5-DIA_60spd_S3-B6_1_7144	Pre_D7_CM	1	338	79	0.20202	FALSE	0	C1R_HUMAN	P00736	FALSE	1_Pre_D7_CM
27	7.11463	8aug24_Sunkyung_D5-DIA_60spd_S3-C6_1_7151	Pre_D7_CM	2	338	56	0.434343	FALSE	0	C1R_HUMAN	P00736	FALSE	2_Pre_D7_CM
28	8.66249	8aug24_Sunkyung_E5-DIA_60spd_S3-D6_1_7158	Pre_D7_CM	3	338	99	0	FALSE	0	C1R_HUMAN	P00736	FALSE	3_Pre_D7_CM
29	7.52067	8aug24_Sunkyung_F5-DIA_60spd_S3-E6_1_7165	Pre_D7_CM	4	338	80	0.191919	FALSE	0	C1R_HUMAN	P00736	FALSE	4_Pre_D7_CM
30	6.92852	8aug24_Sunkyung_G5-DIA_60spd_S3-F6_1_7172	Pre_D7_CM	5	338	24	0.757576	TRUE	0	C1R_HUMAN	P00736	FALSE	5_Pre_D7_CM
1	7.01392	8aug24_Sunkyung_C2-DIA_60spd_S3-B3_1_7141	Post_D0	6	308	47	0.308824	FALSE	0	C1S_HUMAN	P09871	FALSE	6_Post_D0
2	8.09229	8aug24_Sunkyung_D2-DIA_60spd_S3-C3_1_7148	Post_D0	7	308	68	0	FALSE	0	C1S_HUMAN	P09871	FALSE	7_Post_D0
3	8.00773	8aug24_Sunkyung_E2-DIA_60spd_S3-D3_1_7155	Post_D0	8	308	57	0.161765	FALSE	0	C1S_HUMAN	P09871	FALSE	8_Post_D0
4	8.9469	8aug24_Sunkyung_F2-DIA_60spd_S3-E3_1_7162	Post_D0	9	308	68	0	FALSE	0	C1S_HUMAN	P09871	FALSE	9_Post_D0
5	7.65899	8aug24_Sunkyung_G2-DIA_60spd_S3-F3_1_7169	Post_D0	10	308	68	0	FALSE	0	C1S_HUMAN	P09871	FALSE	10_Post_D0
6	7.18821	8aug24_Sunkyung_C4-DIA_60spd_S3-B5_1_7143	Post_D7_CC	6	96	36	0.470588	FALSE	0	C1S_HUMAN	P09871	FALSE	6_Post_D7_CC
7	3.82299	8aug24_Sunkyung_D4-DIA_60spd_S3-C5_1_7150	Post_D7_CC	7	96	12	0.823529	TRUE	0	C1S_HUMAN	P09871	FALSE	7_Post_D7_CC
8	6.98471	8aug24_Sunkyung_E4-DIA_60spd_S3-D5_1_7157	Post_D7_CC	8	96	24	0.647059	TRUE	0	C1S_HUMAN	P09871	FALSE	8_Post_D7_CC
9	4.94327	8aug24_Sunkyung_F4-DIA_60spd_S3-E5_1_7164	Post_D7_CC	9	96	24	0.647059	TRUE	0	C1S_HUMAN	P09871	FALSE	9_Post_D7_CC
11	7.71045	8aug24_Sunkyung_C6-DIA_60spd_S3-B7_1_7145	Post_D7_CM	6	189	47	0.308824	FALSE	0	C1S_HUMAN	P09871	FALSE	6_Post_D7_CM
12	6.906	8aug24_Sunkyung_D6-DIA_60spd_S3-C7_1_7152	Post_D7_CM	7	189	47	0.308824	FALSE	0	C1S_HUMAN	P09871	FALSE	7_Post_D7_CM
13	7.20198	8aug24_Sunkyung_E6-DIA_60spd_S3-D7_1_7159	Post_D7_CM	8	189	47	0.308824	FALSE	0	C1S_HUMAN	P09871	FALSE	8_Post_D7_CM
14	6.83212	8aug24_Sunkyung_F6-DIA_60spd_S3-E7_1_7166	Post_D7_CM	9	189	24	0.647059	TRUE	0	C1S_HUMAN	P09871	FALSE	9_Post_D7_CM
15	6.60367	8aug24_Sunkyung_G6-DIA_60spd_S3-F7_1_7173	Post_D7_CM	10	189	24	0.647059	TRUE	0	C1S_HUMAN	P09871	FALSE	10_Post_D7_CM
16	7.63255	8aug24_Sunkyung_C1b-DIA_60spd_S3-B2_1_7140	Pre_D0	1	208	24	0.647059	TRUE	0	C1S_HUMAN	P09871	FALSE	1_Pre_D0
17	8.61289	8aug24_Sunkyung_D1-DIA_60spd_S3-C2_1_7147	Pre_D0	2	208	57	0.161765	FALSE	0	C1S_HUMAN	P09871	FALSE	2_Pre_D0
18	8.22625	8aug24_Sunkyung_E1-DIA_60spd_S3-D2_1_7154	Pre_D0	3	208	57	0.161765	FALSE	0	C1S_HUMAN	P09871	FALSE	3_Pre_D0
19	7.17842	8aug24_Sunkyung_F1-DIA_60spd_S3-E2_1_7161	Pre_D0	4	208	46	0.323529	FALSE	0	C1S_HUMAN	P09871	FALSE	4_Pre_D0
20	5.14496	8aug24_Sunkyung_G1-DIA_60spd_S3-F2_1_7168	Pre_D0	5	208	24	0.647059	TRUE	0	C1S_HUMAN	P09871	FALSE	5_Pre_D0
21	8.32863	8aug24_Sunkyung_C3-DIA_60spd_S3-B4_1_7142	Pre_D7_CC	1	161	46	0.323529	FALSE	0	C1S_HUMAN	P09871	FALSE	1_Pre_D7_CC
22	7.38377	8aug24_Sunkyung_D3-DIA_60spd_S3-C4_1_7149	Pre_D7_CC	2	161	46	0.323529	FALSE	0	C1S_HUMAN	P09871	FALSE	2_Pre_D7_CC
23	8.07354	8aug24_Sunkyung_E3-DIA_60spd_S3-D4_1_7156	Pre_D7_CC	3	161	57	0.161765	FALSE	0	C1S_HUMAN	P09871	FALSE	3_Pre_D7_CC
24	6.25604	8aug24_Sunkyung_F3-DIA_60spd_S3-E4_1_7163	Pre_D7_CC	4	161	12	0.823529	TRUE	0	C1S_HUMAN	P09871	FALSE	4_Pre_D7_CC
26	7.84776	8aug24_Sunkyung_C5-DIA_60spd_S3-B6_1_7144	Pre_D7_CM	1	230	68	0	FALSE	0	C1S_HUMAN	P09871	FALSE	1_Pre_D7_CM
27	7.04852	8aug24_Sunkyung_D5-DIA_60spd_S3-C6_1_7151	Pre_D7_CM	2	230	46	0.323529	FALSE	0	C1S_HUMAN	P09871	FALSE	2_Pre_D7_CM
28	7.983	8aug24_Sunkyung_E5-DIA_60spd_S3-D6_1_7158	Pre_D7_CM	3	230	57	0.161765	FALSE	0	C1S_HUMAN	P09871	FALSE	3_Pre_D7_CM
29	7.59492	8aug24_Sunkyung_F5-DIA_60spd_S3-E6_1_7165	Pre_D7_CM	4	230	47	0.308824	FALSE	0	C1S_HUMAN	P09871	FALSE	4_Pre_D7_CM
30	5.74554	8aug24_Sunkyung_G5-DIA_60spd_S3-F6_1_7172	Pre_D7_CM	5	230	12	0.823529	TRUE	0	C1S_HUMAN	P09871	FALSE	5_Pre_D7_CM
1	6.36344	8aug24_Sunkyung_C2-DIA_60spd_S3-B3_1_7141	Post_D0	6	482	10	0.936709	TRUE	0	CALD1_HUMAN	Q05682	FALSE	6_Post_D0
2	6.76716	8aug24_Sunkyung_D2-DIA_60spd_S3-C3_1_7148	Post_D0	7	482	95	0.398734	FALSE	0	CALD1_HUMAN	Q05682	FALSE	7_Post_D0
3	7.88353	8aug24_Sunkyung_E2-DIA_60spd_S3-D3_1_7155	Post_D0	8	482	158	0	FALSE	0	CALD1_HUMAN	Q05682	FALSE	8_Post_D0
4	7.90747	8aug24_Sunkyung_F2-DIA_60spd_S3-E3_1_7162	Post_D0	9	482	145	0.0822785	FALSE	0	CALD1_HUMAN	Q05682	FALSE	9_Post_D0
5	5.59083	8aug24_Sunkyung_G2-DIA_60spd_S3-F3_1_7169	Post_D0	10	482	74	0.531646	TRUE	0	CALD1_HUMAN	Q05682	FALSE	10_Post_D0
6	6.77899	8aug24_Sunkyung_C4-DIA_60spd_S3-B5_1_7143	Post_D7_CC	6	457	55	0.651899	TRUE	0	CALD1_HUMAN	Q05682	FALSE	6_Post_D7_CC
7	7.41755	8aug24_Sunkyung_D4-DIA_60spd_S3-C5_1_7150	Post_D7_CC	7	457	112	0.291139	FALSE	0	CALD1_HUMAN	Q05682	FALSE	7_Post_D7_CC
8	6.97214	8aug24_Sunkyung_E4-DIA_60spd_S3-D5_1_7157	Post_D7_CC	8	457	65	0.588608	TRUE	0	CALD1_HUMAN	Q05682	FALSE	8_Post_D7_CC
9	7.59869	8aug24_Sunkyung_F4-DIA_60spd_S3-E5_1_7164	Post_D7_CC	9	457	120	0.240506	FALSE	0	CALD1_HUMAN	Q05682	FALSE	9_Post_D7_CC
10	7.45069	8aug24_Sunkyung_G4-DIA_60spd_S3-F5_1_7171	Post_D7_CC	10	457	105	0.335443	FALSE	0	CALD1_HUMAN	Q05682	FALSE	10_Post_D7_CC
12	6.64915	8aug24_Sunkyung_D6-DIA_60spd_S3-C7_1_7152	Post_D7_CM	7	385	86	0.455696	FALSE	0	CALD1_HUMAN	Q05682	FALSE	7_Post_D7_CM
13	6.88207	8aug24_Sunkyung_E6-DIA_60spd_S3-D7_1_7159	Post_D7_CM	8	385	116	0.265823	FALSE	0	CALD1_HUMAN	Q05682	FALSE	8_Post_D7_CM
14	7.43161	8aug24_Sunkyung_F6-DIA_60spd_S3-E7_1_7166	Post_D7_CM	9	385	125	0.208861	FALSE	0	CALD1_HUMAN	Q05682	FALSE	9_Post_D7_CM
15	6.58869	8aug24_Sunkyung_G6-DIA_60spd_S3-F7_1_7173	Post_D7_CM	10	385	58	0.632911	TRUE	0	CALD1_HUMAN	Q05682	FALSE	10_Post_D7_CM
16	6.86368	8aug24_Sunkyung_C1b-DIA_60spd_S3-B2_1_7140	Pre_D0	1	536	58	0.632911	TRUE	0	CALD1_HUMAN	Q05682	FALSE	1_Pre_D0
17	7.06111	8aug24_Sunkyung_D1-DIA_60spd_S3-C2_1_7147	Pre_D0	2	536	96	0.392405	FALSE	0	CALD1_HUMAN	Q05682	FALSE	2_Pre_D0
18	7.53843	8aug24_Sunkyung_E1-DIA_60spd_S3-D2_1_7154	Pre_D0	3	536	142	0.101266	FALSE	0	CALD1_HUMAN	Q05682	FALSE	3_Pre_D0
19	7.08173	8aug24_Sunkyung_F1-DIA_60spd_S3-E2_1_7161	Pre_D0	4	536	82	0.481013	FALSE	0	CALD1_HUMAN	Q05682	FALSE	4_Pre_D0
20	8.26215	8aug24_Sunkyung_G1-DIA_60spd_S3-F2_1_7168	Pre_D0	5	536	158	0	FALSE	0	CALD1_HUMAN	Q05682	FALSE	5_Pre_D0
21	6.70683	8aug24_Sunkyung_C3-DIA_60spd_S3-B4_1_7142	Pre_D7_CC	1	374	48	0.696203	TRUE	0	CALD1_HUMAN	Q05682	FALSE	1_Pre_D7_CC
22	7.37913	8aug24_Sunkyung_D3-DIA_60spd_S3-C4_1_7149	Pre_D7_CC	2	374	81	0.487342	FALSE	0	CALD1_HUMAN	Q05682	FALSE	2_Pre_D7_CC
23	6.69295	8aug24_Sunkyung_E3-DIA_60spd_S3-D4_1_7156	Pre_D7_CC	3	374	64	0.594937	TRUE	0	CALD1_HUMAN	Q05682	FALSE	3_Pre_D7_CC
24	7.64571	8aug24_Sunkyung_F3-DIA_60spd_S3-E4_1_7163	Pre_D7_CC	4	374	100	0.367089	FALSE	0	CALD1_HUMAN	Q05682	FALSE	4_Pre_D7_CC
25	6.69456	8aug24_Sunkyung_G3-DIA_60spd_S3-F4_1_7170	Pre_D7_CC	5	374	81	0.487342	FALSE	0	CALD1_HUMAN	Q05682	FALSE	5_Pre_D7_CC
26	6.50054	8aug24_Sunkyung_C5-DIA_60spd_S3-B6_1_7144	Pre_D7_CM	1	408	58	0.632911	TRUE	0	CALD1_HUMAN	Q05682	FALSE	1_Pre_D7_CM
27	6.89194	8aug24_Sunkyung_D5-DIA_60spd_S3-C6_1_7151	Pre_D7_CM	2	408	56	0.64557	TRUE	0	CALD1_HUMAN	Q05682	FALSE	2_Pre_D7_CM
28	6.81205	8aug24_Sunkyung_E5-DIA_60spd_S3-D6_1_7158	Pre_D7_CM	3	408	81	0.487342	FALSE	0	CALD1_HUMAN	Q05682	FALSE	3_Pre_D7_CM
29	7.12033	8aug24_Sunkyung_F5-DIA_60spd_S3-E6_1_7165	Pre_D7_CM	4	408	132	0.164557	FALSE	0	CALD1_HUMAN	Q05682	FALSE	4_Pre_D7_CM
30	7.11974	8aug24_Sunkyung_G5-DIA_60spd_S3-F6_1_7172	Pre_D7_CM	5	408	81	0.487342	FALSE	0	CALD1_HUMAN	Q05682	FALSE	5_Pre_D7_CM
2	8.9744	8aug24_Sunkyung_D2-DIA_60spd_S3-C3_1_7148	Post_D0	7	14	7	0	FALSE	0	CALL3_HUMAN	P27482	FALSE	7_Post_D0
4	9.17475	8aug24_Sunkyung_F2-DIA_60spd_S3-E3_1_7162	Post_D0	9	14	7	0	FALSE	0	CALL3_HUMAN	P27482	FALSE	9_Post_D0
7	8.80532	8aug24_Sunkyung_D4-DIA_60spd_S3-C5_1_7150	Post_D7_CC	7	14	7	0	FALSE	0	CALL3_HUMAN	P27482	FALSE	7_Post_D7_CC
8	8.45459	8aug24_Sunkyung_E4-DIA_60spd_S3-D5_1_7157	Post_D7_CC	8	14	7	0	FALSE	0	CALL3_HUMAN	P27482	FALSE	8_Post_D7_CC
12	10.5126	8aug24_Sunkyung_D6-DIA_60spd_S3-C7_1_7152	Post_D7_CM	7	28	7	0	FALSE	0	CALL3_HUMAN	P27482	FALSE	7_Post_D7_CM
13	9.10453	8aug24_Sunkyung_E6-DIA_60spd_S3-D7_1_7159	Post_D7_CM	8	28	7	0	FALSE	0	CALL3_HUMAN	P27482	FALSE	8_Post_D7_CM
14	8.97073	8aug24_Sunkyung_F6-DIA_60spd_S3-E7_1_7166	Post_D7_CM	9	28	7	0	FALSE	0	CALL3_HUMAN	P27482	FALSE	9_Post_D7_CM
15	9.71572	8aug24_Sunkyung_G6-DIA_60spd_S3-F7_1_7173	Post_D7_CM	10	28	7	0	FALSE	0	CALL3_HUMAN	P27482	FALSE	10_Post_D7_CM
18	8.84547	8aug24_Sunkyung_E1-DIA_60spd_S3-D2_1_7154	Pre_D0	3	21	7	0	FALSE	0	CALL3_HUMAN	P27482	FALSE	3_Pre_D0
19	8.73565	8aug24_Sunkyung_F1-DIA_60spd_S3-E2_1_7161	Pre_D0	4	21	7	0	FALSE	0	CALL3_HUMAN	P27482	FALSE	4_Pre_D0
20	9.19966	8aug24_Sunkyung_G1-DIA_60spd_S3-F2_1_7168	Pre_D0	5	21	7	0	FALSE	0	CALL3_HUMAN	P27482	FALSE	5_Pre_D0
24	8.76734	8aug24_Sunkyung_F3-DIA_60spd_S3-E4_1_7163	Pre_D7_CC	4	7	7	0	FALSE	0	CALL3_HUMAN	P27482	FALSE	4_Pre_D7_CC
29	9.21795	8aug24_Sunkyung_F5-DIA_60spd_S3-E6_1_7165	Pre_D7_CM	4	14	7	0	FALSE	0	CALL3_HUMAN	P27482	FALSE	4_Pre_D7_CM
30	8.81766	8aug24_Sunkyung_G5-DIA_60spd_S3-F6_1_7172	Pre_D7_CM	5	14	7	0	FALSE	0	CALL3_HUMAN	P27482	FALSE	5_Pre_D7_CM
1	9.1469	8aug24_Sunkyung_C2-DIA_60spd_S3-B3_1_7141	Post_D0	6	40	8	0.529412	TRUE	0	CALL5_HUMAN	Q9NZT1	FALSE	6_Post_D0
2	7.32257	8aug24_Sunkyung_D2-DIA_60spd_S3-C3_1_7148	Post_D0	7	40	8	0.529412	TRUE	0	CALL5_HUMAN	Q9NZT1	FALSE	7_Post_D0
3	8.32051	8aug24_Sunkyung_E2-DIA_60spd_S3-D3_1_7155	Post_D0	8	40	8	0.529412	TRUE	0	CALL5_HUMAN	Q9NZT1	FALSE	8_Post_D0
4	7.3416	8aug24_Sunkyung_F2-DIA_60spd_S3-E3_1_7162	Post_D0	9	40	8	0.529412	TRUE	0	CALL5_HUMAN	Q9NZT1	FALSE	9_Post_D0
5	8.55044	8aug24_Sunkyung_G2-DIA_60spd_S3-F3_1_7169	Post_D0	10	40	8	0.529412	TRUE	0	CALL5_HUMAN	Q9NZT1	FALSE	10_Post_D0
6	7.32343	8aug24_Sunkyung_C4-DIA_60spd_S3-B5_1_7143	Post_D7_CC	6	49	17	0	FALSE	0	CALL5_HUMAN	Q9NZT1	FALSE	6_Post_D7_CC
7	8.19947	8aug24_Sunkyung_D4-DIA_60spd_S3-C5_1_7150	Post_D7_CC	7	49	8	0.529412	TRUE	0	CALL5_HUMAN	Q9NZT1	FALSE	7_Post_D7_CC
8	8.11057	8aug24_Sunkyung_E4-DIA_60spd_S3-D5_1_7157	Post_D7_CC	8	49	8	0.529412	TRUE	0	CALL5_HUMAN	Q9NZT1	FALSE	8_Post_D7_CC
9	7.46779	8aug24_Sunkyung_F4-DIA_60spd_S3-E5_1_7164	Post_D7_CC	9	49	8	0.529412	TRUE	0	CALL5_HUMAN	Q9NZT1	FALSE	9_Post_D7_CC
10	7.57372	8aug24_Sunkyung_G4-DIA_60spd_S3-F5_1_7171	Post_D7_CC	10	49	8	0.529412	TRUE	0	CALL5_HUMAN	Q9NZT1	FALSE	10_Post_D7_CC
11	8.3248	8aug24_Sunkyung_C6-DIA_60spd_S3-B7_1_7145	Post_D7_CM	6	50	8	0.529412	TRUE	0	CALL5_HUMAN	Q9NZT1	FALSE	6_Post_D7_CM
12	9.42471	8aug24_Sunkyung_D6-DIA_60spd_S3-C7_1_7152	Post_D7_CM	7	50	17	0	FALSE	0	CALL5_HUMAN	Q9NZT1	FALSE	7_Post_D7_CM
13	8.15525	8aug24_Sunkyung_E6-DIA_60spd_S3-D7_1_7159	Post_D7_CM	8	50	8	0.529412	TRUE	0	CALL5_HUMAN	Q9NZT1	FALSE	8_Post_D7_CM
14	7.25461	8aug24_Sunkyung_F6-DIA_60spd_S3-E7_1_7166	Post_D7_CM	9	50	17	0	FALSE	0	CALL5_HUMAN	Q9NZT1	FALSE	9_Post_D7_CM
16	8.84347	8aug24_Sunkyung_C1b-DIA_60spd_S3-B2_1_7140	Pre_D0	1	33	8	0.529412	TRUE	0	CALL5_HUMAN	Q9NZT1	FALSE	1_Pre_D0
17	7.62336	8aug24_Sunkyung_D1-DIA_60spd_S3-C2_1_7147	Pre_D0	2	33	17	0	FALSE	0	CALL5_HUMAN	Q9NZT1	FALSE	2_Pre_D0
18	8.4575	8aug24_Sunkyung_E1-DIA_60spd_S3-D2_1_7154	Pre_D0	3	33	8	0.529412	TRUE	0	CALL5_HUMAN	Q9NZT1	FALSE	3_Pre_D0
21	8.10098	8aug24_Sunkyung_C3-DIA_60spd_S3-B4_1_7142	Pre_D7_CC	1	32	8	0.529412	TRUE	0	CALL5_HUMAN	Q9NZT1	FALSE	1_Pre_D7_CC
22	8.55195	8aug24_Sunkyung_D3-DIA_60spd_S3-C4_1_7149	Pre_D7_CC	2	32	8	0.529412	TRUE	0	CALL5_HUMAN	Q9NZT1	FALSE	2_Pre_D7_CC
24	8.08754	8aug24_Sunkyung_F3-DIA_60spd_S3-E4_1_7163	Pre_D7_CC	4	32	8	0.529412	TRUE	0	CALL5_HUMAN	Q9NZT1	FALSE	4_Pre_D7_CC
25	6.36842	8aug24_Sunkyung_G3-DIA_60spd_S3-F4_1_7170	Pre_D7_CC	5	32	8	0.529412	TRUE	0	CALL5_HUMAN	Q9NZT1	FALSE	5_Pre_D7_CC
26	7.36809	8aug24_Sunkyung_C5-DIA_60spd_S3-B6_1_7144	Pre_D7_CM	1	25	9	0.470588	FALSE	0	CALL5_HUMAN	Q9NZT1	FALSE	1_Pre_D7_CM
29	7.38684	8aug24_Sunkyung_F5-DIA_60spd_S3-E6_1_7165	Pre_D7_CM	4	25	8	0.529412	TRUE	0	CALL5_HUMAN	Q9NZT1	FALSE	4_Pre_D7_CM
30	7.59072	8aug24_Sunkyung_G5-DIA_60spd_S3-F6_1_7172	Pre_D7_CM	5	25	8	0.529412	TRUE	0	CALL5_HUMAN	Q9NZT1	FALSE	5_Pre_D7_CM
1	5.77328	8aug24_Sunkyung_C2-DIA_60spd_S3-B3_1_7141	Post_D0	6	253	12	0.835616	TRUE	0	CALR_HUMAN	P27797	FALSE	6_Post_D0
2	7.37538	8aug24_Sunkyung_D2-DIA_60spd_S3-C3_1_7148	Post_D0	7	253	48	0.342466	FALSE	0	CALR_HUMAN	P27797	FALSE	7_Post_D0
3	8.13493	8aug24_Sunkyung_E2-DIA_60spd_S3-D3_1_7155	Post_D0	8	253	73	0	FALSE	0	CALR_HUMAN	P27797	FALSE	8_Post_D0
4	7.85482	8aug24_Sunkyung_F2-DIA_60spd_S3-E3_1_7162	Post_D0	9	253	73	0	FALSE	0	CALR_HUMAN	P27797	FALSE	9_Post_D0
5	6.59034	8aug24_Sunkyung_G2-DIA_60spd_S3-F3_1_7169	Post_D0	10	253	47	0.356164	FALSE	0	CALR_HUMAN	P27797	FALSE	10_Post_D0
6	6.84891	8aug24_Sunkyung_C4-DIA_60spd_S3-B5_1_7143	Post_D7_CC	6	222	30	0.589041	TRUE	0	CALR_HUMAN	P27797	FALSE	6_Post_D7_CC
7	6.67593	8aug24_Sunkyung_D4-DIA_60spd_S3-C5_1_7150	Post_D7_CC	7	222	24	0.671233	TRUE	0	CALR_HUMAN	P27797	FALSE	7_Post_D7_CC
8	7.38494	8aug24_Sunkyung_E4-DIA_60spd_S3-D5_1_7157	Post_D7_CC	8	222	59	0.191781	FALSE	0	CALR_HUMAN	P27797	FALSE	8_Post_D7_CC
9	7.39704	8aug24_Sunkyung_F4-DIA_60spd_S3-E5_1_7164	Post_D7_CC	9	222	36	0.506849	TRUE	0	CALR_HUMAN	P27797	FALSE	9_Post_D7_CC
10	7.63451	8aug24_Sunkyung_G4-DIA_60spd_S3-F5_1_7171	Post_D7_CC	10	222	73	0	FALSE	0	CALR_HUMAN	P27797	FALSE	10_Post_D7_CC
11	6.19202	8aug24_Sunkyung_C6-DIA_60spd_S3-B7_1_7145	Post_D7_CM	6	288	24	0.671233	TRUE	0	CALR_HUMAN	P27797	FALSE	6_Post_D7_CM
12	7.29881	8aug24_Sunkyung_D6-DIA_60spd_S3-C7_1_7152	Post_D7_CM	7	288	67	0.0821918	FALSE	0	CALR_HUMAN	P27797	FALSE	7_Post_D7_CM
13	8.11192	8aug24_Sunkyung_E6-DIA_60spd_S3-D7_1_7159	Post_D7_CM	8	288	59	0.191781	FALSE	0	CALR_HUMAN	P27797	FALSE	8_Post_D7_CM
14	8.22313	8aug24_Sunkyung_F6-DIA_60spd_S3-E7_1_7166	Post_D7_CM	9	288	73	0	FALSE	0	CALR_HUMAN	P27797	FALSE	9_Post_D7_CM
15	7.63456	8aug24_Sunkyung_G6-DIA_60spd_S3-F7_1_7173	Post_D7_CM	10	288	65	0.109589	FALSE	0	CALR_HUMAN	P27797	FALSE	10_Post_D7_CM
16	7.02933	8aug24_Sunkyung_C1b-DIA_60spd_S3-B2_1_7140	Pre_D0	1	260	48	0.342466	FALSE	0	CALR_HUMAN	P27797	FALSE	1_Pre_D0
17	7.37046	8aug24_Sunkyung_D1-DIA_60spd_S3-C2_1_7147	Pre_D0	2	260	35	0.520548	TRUE	0	CALR_HUMAN	P27797	FALSE	2_Pre_D0
18	7.89998	8aug24_Sunkyung_E1-DIA_60spd_S3-D2_1_7154	Pre_D0	3	260	65	0.109589	FALSE	0	CALR_HUMAN	P27797	FALSE	3_Pre_D0
19	7.04931	8aug24_Sunkyung_F1-DIA_60spd_S3-E2_1_7161	Pre_D0	4	260	47	0.356164	FALSE	0	CALR_HUMAN	P27797	FALSE	4_Pre_D0
20	7.63451	8aug24_Sunkyung_G1-DIA_60spd_S3-F2_1_7168	Pre_D0	5	260	65	0.109589	FALSE	0	CALR_HUMAN	P27797	FALSE	5_Pre_D0
21	6.40939	8aug24_Sunkyung_C3-DIA_60spd_S3-B4_1_7142	Pre_D7_CC	1	286	59	0.191781	FALSE	0	CALR_HUMAN	P27797	FALSE	1_Pre_D7_CC
22	7.63451	8aug24_Sunkyung_D3-DIA_60spd_S3-C4_1_7149	Pre_D7_CC	2	286	53	0.273973	FALSE	0	CALR_HUMAN	P27797	FALSE	2_Pre_D7_CC
23	6.8242	8aug24_Sunkyung_E3-DIA_60spd_S3-D4_1_7156	Pre_D7_CC	3	286	48	0.342466	FALSE	0	CALR_HUMAN	P27797	FALSE	3_Pre_D7_CC
24	7.77521	8aug24_Sunkyung_F3-DIA_60spd_S3-E4_1_7163	Pre_D7_CC	4	286	73	0	FALSE	0	CALR_HUMAN	P27797	FALSE	4_Pre_D7_CC
25	7.39689	8aug24_Sunkyung_G3-DIA_60spd_S3-F4_1_7170	Pre_D7_CC	5	286	53	0.273973	FALSE	0	CALR_HUMAN	P27797	FALSE	5_Pre_D7_CC
26	6.4494	8aug24_Sunkyung_C5-DIA_60spd_S3-B6_1_7144	Pre_D7_CM	1	297	36	0.506849	TRUE	0	CALR_HUMAN	P27797	FALSE	1_Pre_D7_CM
27	7.29583	8aug24_Sunkyung_D5-DIA_60spd_S3-C6_1_7151	Pre_D7_CM	2	297	56	0.232877	FALSE	0	CALR_HUMAN	P27797	FALSE	2_Pre_D7_CM
28	7.804	8aug24_Sunkyung_E5-DIA_60spd_S3-D6_1_7158	Pre_D7_CM	3	297	59	0.191781	FALSE	0	CALR_HUMAN	P27797	FALSE	3_Pre_D7_CM
29	8.04462	8aug24_Sunkyung_F5-DIA_60spd_S3-E6_1_7165	Pre_D7_CM	4	297	73	0	FALSE	0	CALR_HUMAN	P27797	FALSE	4_Pre_D7_CM
30	7.46731	8aug24_Sunkyung_G5-DIA_60spd_S3-F6_1_7172	Pre_D7_CM	5	297	73	0	FALSE	0	CALR_HUMAN	P27797	FALSE	5_Pre_D7_CM
1	5.6724	8aug24_Sunkyung_C2-DIA_60spd_S3-B3_1_7141	Post_D0	6	126	30	0	FALSE	0	CALU_HUMAN	O43852	FALSE	6_Post_D0
2	6.68016	8aug24_Sunkyung_D2-DIA_60spd_S3-C3_1_7148	Post_D0	7	126	18	0.4	FALSE	0	CALU_HUMAN	O43852	FALSE	7_Post_D0
3	6.63113	8aug24_Sunkyung_E2-DIA_60spd_S3-D3_1_7155	Post_D0	8	126	18	0.4	FALSE	0	CALU_HUMAN	O43852	FALSE	8_Post_D0
4	6.93191	8aug24_Sunkyung_F2-DIA_60spd_S3-E3_1_7162	Post_D0	9	126	30	0	FALSE	0	CALU_HUMAN	O43852	FALSE	9_Post_D0
5	5.79064	8aug24_Sunkyung_G2-DIA_60spd_S3-F3_1_7169	Post_D0	10	126	30	0	FALSE	0	CALU_HUMAN	O43852	FALSE	10_Post_D0
6	5.95454	8aug24_Sunkyung_C4-DIA_60spd_S3-B5_1_7143	Post_D7_CC	6	76	20	0.333333	FALSE	0	CALU_HUMAN	O43852	FALSE	6_Post_D7_CC
7	5.6724	8aug24_Sunkyung_D4-DIA_60spd_S3-C5_1_7150	Post_D7_CC	7	76	8	0.733333	TRUE	0	CALU_HUMAN	O43852	FALSE	7_Post_D7_CC
9	6.04747	8aug24_Sunkyung_F4-DIA_60spd_S3-E5_1_7164	Post_D7_CC	9	76	30	0	FALSE	0	CALU_HUMAN	O43852	FALSE	9_Post_D7_CC
10	6.07224	8aug24_Sunkyung_G4-DIA_60spd_S3-F5_1_7171	Post_D7_CC	10	76	18	0.4	FALSE	0	CALU_HUMAN	O43852	FALSE	10_Post_D7_CC
11	6.17374	8aug24_Sunkyung_C6-DIA_60spd_S3-B7_1_7145	Post_D7_CM	6	92	8	0.733333	TRUE	0	CALU_HUMAN	O43852	FALSE	6_Post_D7_CM
12	5.79067	8aug24_Sunkyung_D6-DIA_60spd_S3-C7_1_7152	Post_D7_CM	7	92	18	0.4	FALSE	0	CALU_HUMAN	O43852	FALSE	7_Post_D7_CM
13	5.66919	8aug24_Sunkyung_E6-DIA_60spd_S3-D7_1_7159	Post_D7_CM	8	92	30	0	FALSE	0	CALU_HUMAN	O43852	FALSE	8_Post_D7_CM
14	6.31474	8aug24_Sunkyung_F6-DIA_60spd_S3-E7_1_7166	Post_D7_CM	9	92	18	0.4	FALSE	0	CALU_HUMAN	O43852	FALSE	9_Post_D7_CM
15	6.07224	8aug24_Sunkyung_G6-DIA_60spd_S3-F7_1_7173	Post_D7_CM	10	92	18	0.4	FALSE	0	CALU_HUMAN	O43852	FALSE	10_Post_D7_CM
16	6.75661	8aug24_Sunkyung_C1b-DIA_60spd_S3-B2_1_7140	Pre_D0	1	102	18	0.4	FALSE	0	CALU_HUMAN	O43852	FALSE	1_Pre_D0
17	6.30622	8aug24_Sunkyung_D1-DIA_60spd_S3-C2_1_7147	Pre_D0	2	102	18	0.4	FALSE	0	CALU_HUMAN	O43852	FALSE	2_Pre_D0
18	6.52707	8aug24_Sunkyung_E1-DIA_60spd_S3-D2_1_7154	Pre_D0	3	102	18	0.4	FALSE	0	CALU_HUMAN	O43852	FALSE	3_Pre_D0
19	5.84622	8aug24_Sunkyung_F1-DIA_60spd_S3-E2_1_7161	Pre_D0	4	102	18	0.4	FALSE	0	CALU_HUMAN	O43852	FALSE	4_Pre_D0
20	6.06276	8aug24_Sunkyung_G1-DIA_60spd_S3-F2_1_7168	Pre_D0	5	102	30	0	FALSE	0	CALU_HUMAN	O43852	FALSE	5_Pre_D0
21	6.46486	8aug24_Sunkyung_C3-DIA_60spd_S3-B4_1_7142	Pre_D7_CC	1	104	18	0.4	FALSE	0	CALU_HUMAN	O43852	FALSE	1_Pre_D7_CC
22	5.68385	8aug24_Sunkyung_D3-DIA_60spd_S3-C4_1_7149	Pre_D7_CC	2	104	30	0	FALSE	0	CALU_HUMAN	O43852	FALSE	2_Pre_D7_CC
23	6.13752	8aug24_Sunkyung_E3-DIA_60spd_S3-D4_1_7156	Pre_D7_CC	3	104	18	0.4	FALSE	0	CALU_HUMAN	O43852	FALSE	3_Pre_D7_CC
24	6.05436	8aug24_Sunkyung_F3-DIA_60spd_S3-E4_1_7163	Pre_D7_CC	4	104	30	0	FALSE	0	CALU_HUMAN	O43852	FALSE	4_Pre_D7_CC
25	5.811	8aug24_Sunkyung_G3-DIA_60spd_S3-F4_1_7170	Pre_D7_CC	5	104	8	0.733333	TRUE	0	CALU_HUMAN	O43852	FALSE	5_Pre_D7_CC
26	5.81393	8aug24_Sunkyung_C5-DIA_60spd_S3-B6_1_7144	Pre_D7_CM	1	98	22	0.266667	FALSE	0	CALU_HUMAN	O43852	FALSE	1_Pre_D7_CM
27	6.12853	8aug24_Sunkyung_D5-DIA_60spd_S3-C6_1_7151	Pre_D7_CM	2	98	10	0.666667	TRUE	0	CALU_HUMAN	O43852	FALSE	2_Pre_D7_CM
28	6.07224	8aug24_Sunkyung_E5-DIA_60spd_S3-D6_1_7158	Pre_D7_CM	3	98	18	0.4	FALSE	0	CALU_HUMAN	O43852	FALSE	3_Pre_D7_CM
29	6.21862	8aug24_Sunkyung_F5-DIA_60spd_S3-E6_1_7165	Pre_D7_CM	4	98	30	0	FALSE	0	CALU_HUMAN	O43852	FALSE	4_Pre_D7_CM
30	6.78735	8aug24_Sunkyung_G5-DIA_60spd_S3-F6_1_7172	Pre_D7_CM	5	98	18	0.4	FALSE	0	CALU_HUMAN	O43852	FALSE	5_Pre_D7_CM
2	5.5745	8aug24_Sunkyung_D2-DIA_60spd_S3-C3_1_7148	Post_D0	7	22	11	0.421053	FALSE	0	CAN1_HUMAN	P07384	FALSE	7_Post_D0
3	6.14722	8aug24_Sunkyung_E2-DIA_60spd_S3-D3_1_7155	Post_D0	8	22	11	0.421053	FALSE	0	CAN1_HUMAN	P07384	FALSE	8_Post_D0
8	6.34061	8aug24_Sunkyung_E4-DIA_60spd_S3-D5_1_7157	Post_D7_CC	8	11	11	0.421053	FALSE	0	CAN1_HUMAN	P07384	FALSE	8_Post_D7_CC
12	8.11908	8aug24_Sunkyung_D6-DIA_60spd_S3-C7_1_7152	Post_D7_CM	7	41	8	0.578947	TRUE	0	CAN1_HUMAN	P07384	FALSE	7_Post_D7_CM
13	6.18619	8aug24_Sunkyung_E6-DIA_60spd_S3-D7_1_7159	Post_D7_CM	8	41	11	0.421053	FALSE	0	CAN1_HUMAN	P07384	FALSE	8_Post_D7_CM
14	5.65173	8aug24_Sunkyung_F6-DIA_60spd_S3-E7_1_7166	Post_D7_CM	9	41	11	0.421053	FALSE	0	CAN1_HUMAN	P07384	FALSE	9_Post_D7_CM
15	6.04924	8aug24_Sunkyung_G6-DIA_60spd_S3-F7_1_7173	Post_D7_CM	10	41	11	0.421053	FALSE	0	CAN1_HUMAN	P07384	FALSE	10_Post_D7_CM
16	7.06673	8aug24_Sunkyung_C1b-DIA_60spd_S3-B2_1_7140	Pre_D0	1	45	15	0.210526	FALSE	0	CAN1_HUMAN	P07384	FALSE	1_Pre_D0
18	7.06417	8aug24_Sunkyung_E1-DIA_60spd_S3-D2_1_7154	Pre_D0	3	45	4	0.789474	TRUE	0	CAN1_HUMAN	P07384	FALSE	3_Pre_D0
19	5.72286	8aug24_Sunkyung_F1-DIA_60spd_S3-E2_1_7161	Pre_D0	4	45	11	0.421053	FALSE	0	CAN1_HUMAN	P07384	FALSE	4_Pre_D0
20	7.56494	8aug24_Sunkyung_G1-DIA_60spd_S3-F2_1_7168	Pre_D0	5	45	15	0.210526	FALSE	0	CAN1_HUMAN	P07384	FALSE	5_Pre_D0
21	3.89865	8aug24_Sunkyung_C3-DIA_60spd_S3-B4_1_7142	Pre_D7_CC	1	4	4	0.789474	TRUE	0	CAN1_HUMAN	P07384	FALSE	1_Pre_D7_CC
29	6.69719	8aug24_Sunkyung_F5-DIA_60spd_S3-E6_1_7165	Pre_D7_CM	4	19	4	0.789474	TRUE	0	CAN1_HUMAN	P07384	FALSE	4_Pre_D7_CM
30	5.75494	8aug24_Sunkyung_G5-DIA_60spd_S3-F6_1_7172	Pre_D7_CM	5	19	15	0.210526	FALSE	0	CAN1_HUMAN	P07384	FALSE	5_Pre_D7_CM
1	5.18437	8aug24_Sunkyung_C2-DIA_60spd_S3-B3_1_7141	Post_D0	6	166	12	0.853659	TRUE	0	CAP1_HUMAN	Q01518	FALSE	6_Post_D0
2	5.17734	8aug24_Sunkyung_D2-DIA_60spd_S3-C3_1_7148	Post_D0	7	166	24	0.707317	TRUE	0	CAP1_HUMAN	Q01518	FALSE	7_Post_D0
3	7.4177	8aug24_Sunkyung_E2-DIA_60spd_S3-D3_1_7155	Post_D0	8	166	71	0.134146	FALSE	0	CAP1_HUMAN	Q01518	FALSE	8_Post_D0
4	6.52536	8aug24_Sunkyung_F2-DIA_60spd_S3-E3_1_7162	Post_D0	9	166	47	0.426829	FALSE	0	CAP1_HUMAN	Q01518	FALSE	9_Post_D0
5	7.28735	8aug24_Sunkyung_G2-DIA_60spd_S3-F3_1_7169	Post_D0	10	166	12	0.853659	TRUE	0	CAP1_HUMAN	Q01518	FALSE	10_Post_D0
6	5.9487	8aug24_Sunkyung_C4-DIA_60spd_S3-B5_1_7143	Post_D7_CC	6	176	46	0.439024	FALSE	0	CAP1_HUMAN	Q01518	FALSE	6_Post_D7_CC
7	6.86752	8aug24_Sunkyung_D4-DIA_60spd_S3-C5_1_7150	Post_D7_CC	7	176	35	0.573171	TRUE	0	CAP1_HUMAN	Q01518	FALSE	7_Post_D7_CC
9	7.08547	8aug24_Sunkyung_F4-DIA_60spd_S3-E5_1_7164	Post_D7_CC	9	176	59	0.280488	FALSE	0	CAP1_HUMAN	Q01518	FALSE	9_Post_D7_CC
10	6.81868	8aug24_Sunkyung_G4-DIA_60spd_S3-F5_1_7171	Post_D7_CC	10	176	36	0.560976	TRUE	0	CAP1_HUMAN	Q01518	FALSE	10_Post_D7_CC
12	7.37146	8aug24_Sunkyung_D6-DIA_60spd_S3-C7_1_7152	Post_D7_CM	7	211	59	0.280488	FALSE	0	CAP1_HUMAN	Q01518	FALSE	7_Post_D7_CM
13	6.53788	8aug24_Sunkyung_E6-DIA_60spd_S3-D7_1_7159	Post_D7_CM	8	211	58	0.292683	FALSE	0	CAP1_HUMAN	Q01518	FALSE	8_Post_D7_CM
14	7.38031	8aug24_Sunkyung_F6-DIA_60spd_S3-E7_1_7166	Post_D7_CM	9	211	82	0	FALSE	0	CAP1_HUMAN	Q01518	FALSE	9_Post_D7_CM
15	6.94499	8aug24_Sunkyung_G6-DIA_60spd_S3-F7_1_7173	Post_D7_CM	10	211	12	0.853659	TRUE	0	CAP1_HUMAN	Q01518	FALSE	10_Post_D7_CM
16	6.79392	8aug24_Sunkyung_C1b-DIA_60spd_S3-B2_1_7140	Pre_D0	1	224	59	0.280488	FALSE	0	CAP1_HUMAN	Q01518	FALSE	1_Pre_D0
17	6.03101	8aug24_Sunkyung_D1-DIA_60spd_S3-C2_1_7147	Pre_D0	2	224	35	0.573171	TRUE	0	CAP1_HUMAN	Q01518	FALSE	2_Pre_D0
18	6.53961	8aug24_Sunkyung_E1-DIA_60spd_S3-D2_1_7154	Pre_D0	3	224	36	0.560976	TRUE	0	CAP1_HUMAN	Q01518	FALSE	3_Pre_D0
19	6.88571	8aug24_Sunkyung_F1-DIA_60spd_S3-E2_1_7161	Pre_D0	4	224	12	0.853659	TRUE	0	CAP1_HUMAN	Q01518	FALSE	4_Pre_D0
20	8.17364	8aug24_Sunkyung_G1-DIA_60spd_S3-F2_1_7168	Pre_D0	5	224	82	0	FALSE	0	CAP1_HUMAN	Q01518	FALSE	5_Pre_D0
21	6.22392	8aug24_Sunkyung_C3-DIA_60spd_S3-B4_1_7142	Pre_D7_CC	1	130	12	0.853659	TRUE	0	CAP1_HUMAN	Q01518	FALSE	1_Pre_D7_CC
22	6.66637	8aug24_Sunkyung_D3-DIA_60spd_S3-C4_1_7149	Pre_D7_CC	2	130	36	0.560976	TRUE	0	CAP1_HUMAN	Q01518	FALSE	2_Pre_D7_CC
24	7.18474	8aug24_Sunkyung_F3-DIA_60spd_S3-E4_1_7163	Pre_D7_CC	4	130	47	0.426829	FALSE	0	CAP1_HUMAN	Q01518	FALSE	4_Pre_D7_CC
25	5.9487	8aug24_Sunkyung_G3-DIA_60spd_S3-F4_1_7170	Pre_D7_CC	5	130	35	0.573171	TRUE	0	CAP1_HUMAN	Q01518	FALSE	5_Pre_D7_CC
26	6.68265	8aug24_Sunkyung_C5-DIA_60spd_S3-B6_1_7144	Pre_D7_CM	1	119	12	0.853659	TRUE	0	CAP1_HUMAN	Q01518	FALSE	1_Pre_D7_CM
28	5.86002	8aug24_Sunkyung_E5-DIA_60spd_S3-D6_1_7158	Pre_D7_CM	3	119	12	0.853659	TRUE	0	CAP1_HUMAN	Q01518	FALSE	3_Pre_D7_CM
29	6.7685	8aug24_Sunkyung_F5-DIA_60spd_S3-E6_1_7165	Pre_D7_CM	4	119	71	0.134146	FALSE	0	CAP1_HUMAN	Q01518	FALSE	4_Pre_D7_CM
30	6.58079	8aug24_Sunkyung_G5-DIA_60spd_S3-F6_1_7172	Pre_D7_CM	5	119	24	0.707317	TRUE	0	CAP1_HUMAN	Q01518	FALSE	5_Pre_D7_CM
2	7.65635	8aug24_Sunkyung_D2-DIA_60spd_S3-C3_1_7148	Post_D0	7	51	19	0.296296	FALSE	0	CASPE_HUMAN	P31944	FALSE	7_Post_D0
3	7.71476	8aug24_Sunkyung_E2-DIA_60spd_S3-D3_1_7155	Post_D0	8	51	12	0.555556	TRUE	0	CASPE_HUMAN	P31944	FALSE	8_Post_D0
5	7.56717	8aug24_Sunkyung_G2-DIA_60spd_S3-F3_1_7169	Post_D0	10	51	20	0.259259	FALSE	0	CASPE_HUMAN	P31944	FALSE	10_Post_D0
7	8.03572	8aug24_Sunkyung_D4-DIA_60spd_S3-C5_1_7150	Post_D7_CC	7	39	27	0	FALSE	0	CASPE_HUMAN	P31944	FALSE	7_Post_D7_CC
8	7.3072	8aug24_Sunkyung_E4-DIA_60spd_S3-D5_1_7157	Post_D7_CC	8	39	12	0.555556	TRUE	0	CASPE_HUMAN	P31944	FALSE	8_Post_D7_CC
11	7.41863	8aug24_Sunkyung_C6-DIA_60spd_S3-B7_1_7145	Post_D7_CM	6	70	12	0.555556	TRUE	0	CASPE_HUMAN	P31944	FALSE	6_Post_D7_CM
12	9.46054	8aug24_Sunkyung_D6-DIA_60spd_S3-C7_1_7152	Post_D7_CM	7	70	27	0	FALSE	0	CASPE_HUMAN	P31944	FALSE	7_Post_D7_CM
13	8.31959	8aug24_Sunkyung_E6-DIA_60spd_S3-D7_1_7159	Post_D7_CM	8	70	12	0.555556	TRUE	0	CASPE_HUMAN	P31944	FALSE	8_Post_D7_CM
14	6.76513	8aug24_Sunkyung_F6-DIA_60spd_S3-E7_1_7166	Post_D7_CM	9	70	7	0.740741	TRUE	0	CASPE_HUMAN	P31944	FALSE	9_Post_D7_CM
15	7.24687	8aug24_Sunkyung_G6-DIA_60spd_S3-F7_1_7173	Post_D7_CM	10	70	12	0.555556	TRUE	0	CASPE_HUMAN	P31944	FALSE	10_Post_D7_CM
17	7.89872	8aug24_Sunkyung_D1-DIA_60spd_S3-C2_1_7147	Pre_D0	2	44	12	0.555556	TRUE	0	CASPE_HUMAN	P31944	FALSE	2_Pre_D0
18	7.01329	8aug24_Sunkyung_E1-DIA_60spd_S3-D2_1_7154	Pre_D0	3	44	12	0.555556	TRUE	0	CASPE_HUMAN	P31944	FALSE	3_Pre_D0
19	6.9518	8aug24_Sunkyung_F1-DIA_60spd_S3-E2_1_7161	Pre_D0	4	44	20	0.259259	FALSE	0	CASPE_HUMAN	P31944	FALSE	4_Pre_D0
21	7.8141	8aug24_Sunkyung_C3-DIA_60spd_S3-B4_1_7142	Pre_D7_CC	1	31	19	0.296296	FALSE	0	CASPE_HUMAN	P31944	FALSE	1_Pre_D7_CC
22	7.41333	8aug24_Sunkyung_D3-DIA_60spd_S3-C4_1_7149	Pre_D7_CC	2	31	12	0.555556	TRUE	0	CASPE_HUMAN	P31944	FALSE	2_Pre_D7_CC
26	7.42601	8aug24_Sunkyung_C5-DIA_60spd_S3-B6_1_7144	Pre_D7_CM	1	24	12	0.555556	TRUE	0	CASPE_HUMAN	P31944	FALSE	1_Pre_D7_CM
27	9.31189	8aug24_Sunkyung_D5-DIA_60spd_S3-C6_1_7151	Pre_D7_CM	2	24	12	0.555556	TRUE	0	CASPE_HUMAN	P31944	FALSE	2_Pre_D7_CM
1	7.47817	8aug24_Sunkyung_C2-DIA_60spd_S3-B3_1_7141	Post_D0	6	116	32	0.319149	FALSE	0	CATA_HUMAN;cRAP-CATA_HUMAN	P04040;cRAP-P04040	FALSE	6_Post_D0
2	6.49194	8aug24_Sunkyung_D2-DIA_60spd_S3-C3_1_7148	Post_D0	7	116	32	0.319149	FALSE	0	CATA_HUMAN;cRAP-CATA_HUMAN	P04040;cRAP-P04040	FALSE	7_Post_D0
3	6.70972	8aug24_Sunkyung_E2-DIA_60spd_S3-D3_1_7155	Post_D0	8	116	23	0.510638	TRUE	0	CATA_HUMAN;cRAP-CATA_HUMAN	P04040;cRAP-P04040	FALSE	8_Post_D0
5	7.46417	8aug24_Sunkyung_G2-DIA_60spd_S3-F3_1_7169	Post_D0	10	116	29	0.382979	FALSE	0	CATA_HUMAN;cRAP-CATA_HUMAN	P04040;cRAP-P04040	FALSE	10_Post_D0
7	7.37416	8aug24_Sunkyung_D4-DIA_60spd_S3-C5_1_7150	Post_D7_CC	7	47	38	0.191489	FALSE	0	CATA_HUMAN;cRAP-CATA_HUMAN	P04040;cRAP-P04040	FALSE	7_Post_D7_CC
9	5.40113	8aug24_Sunkyung_F4-DIA_60spd_S3-E5_1_7164	Post_D7_CC	9	47	9	0.808511	TRUE	0	CATA_HUMAN;cRAP-CATA_HUMAN	P04040;cRAP-P04040	FALSE	9_Post_D7_CC
11	7.21101	8aug24_Sunkyung_C6-DIA_60spd_S3-B7_1_7145	Post_D7_CM	6	151	36	0.234043	FALSE	0	CATA_HUMAN;cRAP-CATA_HUMAN	P04040;cRAP-P04040	FALSE	6_Post_D7_CM
12	8.19489	8aug24_Sunkyung_D6-DIA_60spd_S3-C7_1_7152	Post_D7_CM	7	151	47	0	FALSE	0	CATA_HUMAN;cRAP-CATA_HUMAN	P04040;cRAP-P04040	FALSE	7_Post_D7_CM
13	7.32223	8aug24_Sunkyung_E6-DIA_60spd_S3-D7_1_7159	Post_D7_CM	8	151	47	0	FALSE	0	CATA_HUMAN;cRAP-CATA_HUMAN	P04040;cRAP-P04040	FALSE	8_Post_D7_CM
14	6.38134	8aug24_Sunkyung_F6-DIA_60spd_S3-E7_1_7166	Post_D7_CM	9	151	21	0.553191	TRUE	0	CATA_HUMAN;cRAP-CATA_HUMAN	P04040;cRAP-P04040	FALSE	9_Post_D7_CM
16	7.89165	8aug24_Sunkyung_C1b-DIA_60spd_S3-B2_1_7140	Pre_D0	1	92	9	0.808511	TRUE	0	CATA_HUMAN;cRAP-CATA_HUMAN	P04040;cRAP-P04040	FALSE	1_Pre_D0
17	7.71643	8aug24_Sunkyung_D1-DIA_60spd_S3-C2_1_7147	Pre_D0	2	92	21	0.553191	TRUE	0	CATA_HUMAN;cRAP-CATA_HUMAN	P04040;cRAP-P04040	FALSE	2_Pre_D0
18	6.25435	8aug24_Sunkyung_E1-DIA_60spd_S3-D2_1_7154	Pre_D0	3	92	21	0.553191	TRUE	0	CATA_HUMAN;cRAP-CATA_HUMAN	P04040;cRAP-P04040	FALSE	3_Pre_D0
19	6.32049	8aug24_Sunkyung_F1-DIA_60spd_S3-E2_1_7161	Pre_D0	4	92	30	0.361702	FALSE	0	CATA_HUMAN;cRAP-CATA_HUMAN	P04040;cRAP-P04040	FALSE	4_Pre_D0
20	6.75842	8aug24_Sunkyung_G1-DIA_60spd_S3-F2_1_7168	Pre_D0	5	92	11	0.765957	TRUE	0	CATA_HUMAN;cRAP-CATA_HUMAN	P04040;cRAP-P04040	FALSE	5_Pre_D0
21	7.48775	8aug24_Sunkyung_C3-DIA_60spd_S3-B4_1_7142	Pre_D7_CC	1	55	20	0.574468	TRUE	0	CATA_HUMAN;cRAP-CATA_HUMAN	P04040;cRAP-P04040	FALSE	1_Pre_D7_CC
23	6.19889	8aug24_Sunkyung_E3-DIA_60spd_S3-D4_1_7156	Pre_D7_CC	3	55	12	0.744681	TRUE	0	CATA_HUMAN;cRAP-CATA_HUMAN	P04040;cRAP-P04040	FALSE	3_Pre_D7_CC
25	6.03457	8aug24_Sunkyung_G3-DIA_60spd_S3-F4_1_7170	Pre_D7_CC	5	55	23	0.510638	TRUE	0	CATA_HUMAN;cRAP-CATA_HUMAN	P04040;cRAP-P04040	FALSE	5_Pre_D7_CC
26	1.25487	8aug24_Sunkyung_C5-DIA_60spd_S3-B6_1_7144	Pre_D7_CM	1	39	9	0.808511	TRUE	0	CATA_HUMAN;cRAP-CATA_HUMAN	P04040;cRAP-P04040	FALSE	1_Pre_D7_CM
27	7.22097	8aug24_Sunkyung_D5-DIA_60spd_S3-C6_1_7151	Pre_D7_CM	2	39	9	0.808511	TRUE	0	CATA_HUMAN;cRAP-CATA_HUMAN	P04040;cRAP-P04040	FALSE	2_Pre_D7_CM
29	6.85985	8aug24_Sunkyung_F5-DIA_60spd_S3-E6_1_7165	Pre_D7_CM	4	39	21	0.553191	TRUE	0	CATA_HUMAN;cRAP-CATA_HUMAN	P04040;cRAP-P04040	FALSE	4_Pre_D7_CM
2	7.70065	8aug24_Sunkyung_D2-DIA_60spd_S3-C3_1_7148	Post_D0	7	128	23	0.342857	FALSE	0	CATB_HUMAN	P07858	FALSE	7_Post_D0
3	8.1669	8aug24_Sunkyung_E2-DIA_60spd_S3-D3_1_7155	Post_D0	8	128	35	0	FALSE	0	CATB_HUMAN	P07858	FALSE	8_Post_D0
4	7.68536	8aug24_Sunkyung_F2-DIA_60spd_S3-E3_1_7162	Post_D0	9	128	35	0	FALSE	0	CATB_HUMAN	P07858	FALSE	9_Post_D0
5	7.99237	8aug24_Sunkyung_G2-DIA_60spd_S3-F3_1_7169	Post_D0	10	128	35	0	FALSE	0	CATB_HUMAN	P07858	FALSE	10_Post_D0
7	8.52917	8aug24_Sunkyung_D4-DIA_60spd_S3-C5_1_7150	Post_D7_CC	7	58	12	0.657143	TRUE	0	CATB_HUMAN	P07858	FALSE	7_Post_D7_CC
8	7.79104	8aug24_Sunkyung_E4-DIA_60spd_S3-D5_1_7157	Post_D7_CC	8	58	11	0.685714	TRUE	0	CATB_HUMAN	P07858	FALSE	8_Post_D7_CC
10	7.4916	8aug24_Sunkyung_G4-DIA_60spd_S3-F5_1_7171	Post_D7_CC	10	58	35	0	FALSE	0	CATB_HUMAN	P07858	FALSE	10_Post_D7_CC
11	6.88533	8aug24_Sunkyung_C6-DIA_60spd_S3-B7_1_7145	Post_D7_CM	6	139	11	0.685714	TRUE	0	CATB_HUMAN	P07858	FALSE	6_Post_D7_CM
12	7.57563	8aug24_Sunkyung_D6-DIA_60spd_S3-C7_1_7152	Post_D7_CM	7	139	35	0	FALSE	0	CATB_HUMAN	P07858	FALSE	7_Post_D7_CM
13	8.26993	8aug24_Sunkyung_E6-DIA_60spd_S3-D7_1_7159	Post_D7_CM	8	139	35	0	FALSE	0	CATB_HUMAN	P07858	FALSE	8_Post_D7_CM
14	8.30407	8aug24_Sunkyung_F6-DIA_60spd_S3-E7_1_7166	Post_D7_CM	9	139	35	0	FALSE	0	CATB_HUMAN	P07858	FALSE	9_Post_D7_CM
15	7.71983	8aug24_Sunkyung_G6-DIA_60spd_S3-F7_1_7173	Post_D7_CM	10	139	23	0.342857	FALSE	0	CATB_HUMAN	P07858	FALSE	10_Post_D7_CM
16	7.83584	8aug24_Sunkyung_C1b-DIA_60spd_S3-B2_1_7140	Pre_D0	1	151	35	0	FALSE	0	CATB_HUMAN	P07858	FALSE	1_Pre_D0
17	7.98513	8aug24_Sunkyung_D1-DIA_60spd_S3-C2_1_7147	Pre_D0	2	151	35	0	FALSE	0	CATB_HUMAN	P07858	FALSE	2_Pre_D0
18	8.13458	8aug24_Sunkyung_E1-DIA_60spd_S3-D2_1_7154	Pre_D0	3	151	35	0	FALSE	0	CATB_HUMAN	P07858	FALSE	3_Pre_D0
19	7.27781	8aug24_Sunkyung_F1-DIA_60spd_S3-E2_1_7161	Pre_D0	4	151	11	0.685714	TRUE	0	CATB_HUMAN	P07858	FALSE	4_Pre_D0
20	8.79599	8aug24_Sunkyung_G1-DIA_60spd_S3-F2_1_7168	Pre_D0	5	151	35	0	FALSE	0	CATB_HUMAN	P07858	FALSE	5_Pre_D0
23	8.0618	8aug24_Sunkyung_E3-DIA_60spd_S3-D4_1_7156	Pre_D7_CC	3	47	23	0.342857	FALSE	0	CATB_HUMAN	P07858	FALSE	3_Pre_D7_CC
24	7.9049	8aug24_Sunkyung_F3-DIA_60spd_S3-E4_1_7163	Pre_D7_CC	4	47	24	0.314286	FALSE	0	CATB_HUMAN	P07858	FALSE	4_Pre_D7_CC
26	7.36319	8aug24_Sunkyung_C5-DIA_60spd_S3-B6_1_7144	Pre_D7_CM	1	106	24	0.314286	FALSE	0	CATB_HUMAN	P07858	FALSE	1_Pre_D7_CM
27	7.92224	8aug24_Sunkyung_D5-DIA_60spd_S3-C6_1_7151	Pre_D7_CM	2	106	12	0.657143	TRUE	0	CATB_HUMAN	P07858	FALSE	2_Pre_D7_CM
28	7.75362	8aug24_Sunkyung_E5-DIA_60spd_S3-D6_1_7158	Pre_D7_CM	3	106	24	0.314286	FALSE	0	CATB_HUMAN	P07858	FALSE	3_Pre_D7_CM
29	8.23259	8aug24_Sunkyung_F5-DIA_60spd_S3-E6_1_7165	Pre_D7_CM	4	106	35	0	FALSE	0	CATB_HUMAN	P07858	FALSE	4_Pre_D7_CM
30	7.89691	8aug24_Sunkyung_G5-DIA_60spd_S3-F6_1_7172	Pre_D7_CM	5	106	11	0.685714	TRUE	0	CATB_HUMAN	P07858	FALSE	5_Pre_D7_CM
1	6.24433	8aug24_Sunkyung_C2-DIA_60spd_S3-B3_1_7141	Post_D0	6	180	36	0.538462	TRUE	0	CATD_HUMAN;cRAP-CATD_HUMAN	P07339;cRAP-P07339	FALSE	6_Post_D0
2	7.49659	8aug24_Sunkyung_D2-DIA_60spd_S3-C3_1_7148	Post_D0	7	180	36	0.538462	TRUE	0	CATD_HUMAN;cRAP-CATD_HUMAN	P07339;cRAP-P07339	FALSE	7_Post_D0
3	7.33971	8aug24_Sunkyung_E2-DIA_60spd_S3-D3_1_7155	Post_D0	8	180	36	0.538462	TRUE	0	CATD_HUMAN;cRAP-CATD_HUMAN	P07339;cRAP-P07339	FALSE	8_Post_D0
4	6.93514	8aug24_Sunkyung_F2-DIA_60spd_S3-E3_1_7162	Post_D0	9	180	36	0.538462	TRUE	0	CATD_HUMAN;cRAP-CATD_HUMAN	P07339;cRAP-P07339	FALSE	9_Post_D0
5	6.97357	8aug24_Sunkyung_G2-DIA_60spd_S3-F3_1_7169	Post_D0	10	180	36	0.538462	TRUE	0	CATD_HUMAN;cRAP-CATD_HUMAN	P07339;cRAP-P07339	FALSE	10_Post_D0
6	6.41388	8aug24_Sunkyung_C4-DIA_60spd_S3-B5_1_7143	Post_D7_CC	6	156	36	0.538462	TRUE	0	CATD_HUMAN;cRAP-CATD_HUMAN	P07339;cRAP-P07339	FALSE	6_Post_D7_CC
7	6.88609	8aug24_Sunkyung_D4-DIA_60spd_S3-C5_1_7150	Post_D7_CC	7	156	24	0.692308	TRUE	0	CATD_HUMAN;cRAP-CATD_HUMAN	P07339;cRAP-P07339	FALSE	7_Post_D7_CC
8	6.97357	8aug24_Sunkyung_E4-DIA_60spd_S3-D5_1_7157	Post_D7_CC	8	156	36	0.538462	TRUE	0	CATD_HUMAN;cRAP-CATD_HUMAN	P07339;cRAP-P07339	FALSE	8_Post_D7_CC
9	6.9773	8aug24_Sunkyung_F4-DIA_60spd_S3-E5_1_7164	Post_D7_CC	9	156	36	0.538462	TRUE	0	CATD_HUMAN;cRAP-CATD_HUMAN	P07339;cRAP-P07339	FALSE	9_Post_D7_CC
10	6.65765	8aug24_Sunkyung_G4-DIA_60spd_S3-F5_1_7171	Post_D7_CC	10	156	24	0.692308	TRUE	0	CATD_HUMAN;cRAP-CATD_HUMAN	P07339;cRAP-P07339	FALSE	10_Post_D7_CC
11	6.96554	8aug24_Sunkyung_C6-DIA_60spd_S3-B7_1_7145	Post_D7_CM	6	240	24	0.692308	TRUE	0	CATD_HUMAN;cRAP-CATD_HUMAN	P07339;cRAP-P07339	FALSE	6_Post_D7_CM
12	8.74499	8aug24_Sunkyung_D6-DIA_60spd_S3-C7_1_7152	Post_D7_CM	7	240	78	0	FALSE	0	CATD_HUMAN;cRAP-CATD_HUMAN	P07339;cRAP-P07339	FALSE	7_Post_D7_CM
13	7.23833	8aug24_Sunkyung_E6-DIA_60spd_S3-D7_1_7159	Post_D7_CM	8	240	36	0.538462	TRUE	0	CATD_HUMAN;cRAP-CATD_HUMAN	P07339;cRAP-P07339	FALSE	8_Post_D7_CM
14	7.80838	8aug24_Sunkyung_F6-DIA_60spd_S3-E7_1_7166	Post_D7_CM	9	240	78	0	FALSE	0	CATD_HUMAN;cRAP-CATD_HUMAN	P07339;cRAP-P07339	FALSE	9_Post_D7_CM
15	6.85028	8aug24_Sunkyung_G6-DIA_60spd_S3-F7_1_7173	Post_D7_CM	10	240	24	0.692308	TRUE	0	CATD_HUMAN;cRAP-CATD_HUMAN	P07339;cRAP-P07339	FALSE	10_Post_D7_CM
16	7.47816	8aug24_Sunkyung_C1b-DIA_60spd_S3-B2_1_7140	Pre_D0	1	188	36	0.538462	TRUE	0	CATD_HUMAN;cRAP-CATD_HUMAN	P07339;cRAP-P07339	FALSE	1_Pre_D0
17	6.71898	8aug24_Sunkyung_D1-DIA_60spd_S3-C2_1_7147	Pre_D0	2	188	29	0.628205	TRUE	0	CATD_HUMAN;cRAP-CATD_HUMAN	P07339;cRAP-P07339	FALSE	2_Pre_D0
18	7.69119	8aug24_Sunkyung_E1-DIA_60spd_S3-D2_1_7154	Pre_D0	3	188	29	0.628205	TRUE	0	CATD_HUMAN;cRAP-CATD_HUMAN	P07339;cRAP-P07339	FALSE	3_Pre_D0
19	6.68865	8aug24_Sunkyung_F1-DIA_60spd_S3-E2_1_7161	Pre_D0	4	188	36	0.538462	TRUE	0	CATD_HUMAN;cRAP-CATD_HUMAN	P07339;cRAP-P07339	FALSE	4_Pre_D0
20	8.04434	8aug24_Sunkyung_G1-DIA_60spd_S3-F2_1_7168	Pre_D0	5	188	58	0.25641	FALSE	0	CATD_HUMAN;cRAP-CATD_HUMAN	P07339;cRAP-P07339	FALSE	5_Pre_D0
21	6.60065	8aug24_Sunkyung_C3-DIA_60spd_S3-B4_1_7142	Pre_D7_CC	1	170	36	0.538462	TRUE	0	CATD_HUMAN;cRAP-CATD_HUMAN	P07339;cRAP-P07339	FALSE	1_Pre_D7_CC
22	7.83747	8aug24_Sunkyung_D3-DIA_60spd_S3-C4_1_7149	Pre_D7_CC	2	170	36	0.538462	TRUE	0	CATD_HUMAN;cRAP-CATD_HUMAN	P07339;cRAP-P07339	FALSE	2_Pre_D7_CC
23	6.9773	8aug24_Sunkyung_E3-DIA_60spd_S3-D4_1_7156	Pre_D7_CC	3	170	41	0.474359	FALSE	0	CATD_HUMAN;cRAP-CATD_HUMAN	P07339;cRAP-P07339	FALSE	3_Pre_D7_CC
24	7.18467	8aug24_Sunkyung_F3-DIA_60spd_S3-E4_1_7163	Pre_D7_CC	4	170	36	0.538462	TRUE	0	CATD_HUMAN;cRAP-CATD_HUMAN	P07339;cRAP-P07339	FALSE	4_Pre_D7_CC
25	7.55325	8aug24_Sunkyung_G3-DIA_60spd_S3-F4_1_7170	Pre_D7_CC	5	170	21	0.730769	TRUE	0	CATD_HUMAN;cRAP-CATD_HUMAN	P07339;cRAP-P07339	FALSE	5_Pre_D7_CC
26	6.97357	8aug24_Sunkyung_C5-DIA_60spd_S3-B6_1_7144	Pre_D7_CM	1	199	36	0.538462	TRUE	0	CATD_HUMAN;cRAP-CATD_HUMAN	P07339;cRAP-P07339	FALSE	1_Pre_D7_CM
27	6.93885	8aug24_Sunkyung_D5-DIA_60spd_S3-C6_1_7151	Pre_D7_CM	2	199	36	0.538462	TRUE	0	CATD_HUMAN;cRAP-CATD_HUMAN	P07339;cRAP-P07339	FALSE	2_Pre_D7_CM
28	6.97687	8aug24_Sunkyung_E5-DIA_60spd_S3-D6_1_7158	Pre_D7_CM	3	199	24	0.692308	TRUE	0	CATD_HUMAN;cRAP-CATD_HUMAN	P07339;cRAP-P07339	FALSE	3_Pre_D7_CM
29	7.61478	8aug24_Sunkyung_F5-DIA_60spd_S3-E6_1_7165	Pre_D7_CM	4	199	51	0.346154	FALSE	0	CATD_HUMAN;cRAP-CATD_HUMAN	P07339;cRAP-P07339	FALSE	4_Pre_D7_CM
30	6.97792	8aug24_Sunkyung_G5-DIA_60spd_S3-F6_1_7172	Pre_D7_CM	5	199	52	0.333333	FALSE	0	CATD_HUMAN;cRAP-CATD_HUMAN	P07339;cRAP-P07339	FALSE	5_Pre_D7_CM
2	7.73136	8aug24_Sunkyung_D2-DIA_60spd_S3-C3_1_7148	Post_D0	7	33	11	0	FALSE	0	CATZ_HUMAN	Q9UBR2	FALSE	7_Post_D0
3	7.24924	8aug24_Sunkyung_E2-DIA_60spd_S3-D3_1_7155	Post_D0	8	33	11	0	FALSE	0	CATZ_HUMAN	Q9UBR2	FALSE	8_Post_D0
4	6.43705	8aug24_Sunkyung_F2-DIA_60spd_S3-E3_1_7162	Post_D0	9	33	11	0	FALSE	0	CATZ_HUMAN	Q9UBR2	FALSE	9_Post_D0
9	5.85208	8aug24_Sunkyung_F4-DIA_60spd_S3-E5_1_7164	Post_D7_CC	9	11	11	0	FALSE	0	CATZ_HUMAN	Q9UBR2	FALSE	9_Post_D7_CC
12	6.08587	8aug24_Sunkyung_D6-DIA_60spd_S3-C7_1_7152	Post_D7_CM	7	44	11	0	FALSE	0	CATZ_HUMAN	Q9UBR2	FALSE	7_Post_D7_CM
13	6.86272	8aug24_Sunkyung_E6-DIA_60spd_S3-D7_1_7159	Post_D7_CM	8	44	11	0	FALSE	0	CATZ_HUMAN	Q9UBR2	FALSE	8_Post_D7_CM
14	7.64025	8aug24_Sunkyung_F6-DIA_60spd_S3-E7_1_7166	Post_D7_CM	9	44	11	0	FALSE	0	CATZ_HUMAN	Q9UBR2	FALSE	9_Post_D7_CM
15	6.43705	8aug24_Sunkyung_G6-DIA_60spd_S3-F7_1_7173	Post_D7_CM	10	44	11	0	FALSE	0	CATZ_HUMAN	Q9UBR2	FALSE	10_Post_D7_CM
18	6.97731	8aug24_Sunkyung_E1-DIA_60spd_S3-D2_1_7154	Pre_D0	3	22	11	0	FALSE	0	CATZ_HUMAN	Q9UBR2	FALSE	3_Pre_D0
20	6.59159	8aug24_Sunkyung_G1-DIA_60spd_S3-F2_1_7168	Pre_D0	5	22	11	0	FALSE	0	CATZ_HUMAN	Q9UBR2	FALSE	5_Pre_D0
21	6.95101	8aug24_Sunkyung_C3-DIA_60spd_S3-B4_1_7142	Pre_D7_CC	1	22	11	0	FALSE	0	CATZ_HUMAN	Q9UBR2	FALSE	1_Pre_D7_CC
23	6.83107	8aug24_Sunkyung_E3-DIA_60spd_S3-D4_1_7156	Pre_D7_CC	3	22	11	0	FALSE	0	CATZ_HUMAN	Q9UBR2	FALSE	3_Pre_D7_CC
27	7.42881	8aug24_Sunkyung_D5-DIA_60spd_S3-C6_1_7151	Pre_D7_CM	2	33	11	0	FALSE	0	CATZ_HUMAN	Q9UBR2	FALSE	2_Pre_D7_CM
29	6.69311	8aug24_Sunkyung_F5-DIA_60spd_S3-E6_1_7165	Pre_D7_CM	4	33	11	0	FALSE	0	CATZ_HUMAN	Q9UBR2	FALSE	4_Pre_D7_CM
30	7.56003	8aug24_Sunkyung_G5-DIA_60spd_S3-F6_1_7172	Pre_D7_CM	5	33	11	0	FALSE	0	CATZ_HUMAN	Q9UBR2	FALSE	5_Pre_D7_CM
1	5.66304	8aug24_Sunkyung_C2-DIA_60spd_S3-B3_1_7141	Post_D0	6	148	24	0.647059	TRUE	0	CAVN1_HUMAN	Q6NZI2	FALSE	6_Post_D0
2	7.50542	8aug24_Sunkyung_D2-DIA_60spd_S3-C3_1_7148	Post_D0	7	148	12	0.823529	TRUE	0	CAVN1_HUMAN	Q6NZI2	FALSE	7_Post_D0
3	7.7022	8aug24_Sunkyung_E2-DIA_60spd_S3-D3_1_7155	Post_D0	8	148	56	0.176471	FALSE	0	CAVN1_HUMAN	Q6NZI2	FALSE	8_Post_D0
4	7.14463	8aug24_Sunkyung_F2-DIA_60spd_S3-E3_1_7162	Post_D0	9	148	56	0.176471	FALSE	0	CAVN1_HUMAN	Q6NZI2	FALSE	9_Post_D0
6	6.86139	8aug24_Sunkyung_C4-DIA_60spd_S3-B5_1_7143	Post_D7_CC	6	72	36	0.470588	FALSE	0	CAVN1_HUMAN	Q6NZI2	FALSE	6_Post_D7_CC
8	7.32311	8aug24_Sunkyung_E4-DIA_60spd_S3-D5_1_7157	Post_D7_CC	8	72	12	0.823529	TRUE	0	CAVN1_HUMAN	Q6NZI2	FALSE	8_Post_D7_CC
10	7.18584	8aug24_Sunkyung_G4-DIA_60spd_S3-F5_1_7171	Post_D7_CC	10	72	24	0.647059	TRUE	0	CAVN1_HUMAN	Q6NZI2	FALSE	10_Post_D7_CC
12	6.34884	8aug24_Sunkyung_D6-DIA_60spd_S3-C7_1_7152	Post_D7_CM	7	118	12	0.823529	TRUE	0	CAVN1_HUMAN	Q6NZI2	FALSE	7_Post_D7_CM
13	7.27158	8aug24_Sunkyung_E6-DIA_60spd_S3-D7_1_7159	Post_D7_CM	8	118	24	0.647059	TRUE	0	CAVN1_HUMAN	Q6NZI2	FALSE	8_Post_D7_CM
14	7.57081	8aug24_Sunkyung_F6-DIA_60spd_S3-E7_1_7166	Post_D7_CM	9	118	58	0.147059	FALSE	0	CAVN1_HUMAN	Q6NZI2	FALSE	9_Post_D7_CM
15	7.24375	8aug24_Sunkyung_G6-DIA_60spd_S3-F7_1_7173	Post_D7_CM	10	118	24	0.647059	TRUE	0	CAVN1_HUMAN	Q6NZI2	FALSE	10_Post_D7_CM
16	7.58828	8aug24_Sunkyung_C1b-DIA_60spd_S3-B2_1_7140	Pre_D0	1	150	35	0.485294	FALSE	0	CAVN1_HUMAN	Q6NZI2	FALSE	1_Pre_D0
17	6.57	8aug24_Sunkyung_D1-DIA_60spd_S3-C2_1_7147	Pre_D0	2	150	12	0.823529	TRUE	0	CAVN1_HUMAN	Q6NZI2	FALSE	2_Pre_D0
18	6.65437	8aug24_Sunkyung_E1-DIA_60spd_S3-D2_1_7154	Pre_D0	3	150	46	0.323529	FALSE	0	CAVN1_HUMAN	Q6NZI2	FALSE	3_Pre_D0
20	7.91826	8aug24_Sunkyung_G1-DIA_60spd_S3-F2_1_7168	Pre_D0	5	150	57	0.161765	FALSE	0	CAVN1_HUMAN	Q6NZI2	FALSE	5_Pre_D0
21	7.20317	8aug24_Sunkyung_C3-DIA_60spd_S3-B4_1_7142	Pre_D7_CC	1	95	24	0.647059	TRUE	0	CAVN1_HUMAN	Q6NZI2	FALSE	1_Pre_D7_CC
22	7.25845	8aug24_Sunkyung_D3-DIA_60spd_S3-C4_1_7149	Pre_D7_CC	2	95	23	0.661765	TRUE	0	CAVN1_HUMAN	Q6NZI2	FALSE	2_Pre_D7_CC
23	8.14339	8aug24_Sunkyung_E3-DIA_60spd_S3-D4_1_7156	Pre_D7_CC	3	95	12	0.823529	TRUE	0	CAVN1_HUMAN	Q6NZI2	FALSE	3_Pre_D7_CC
24	7.26525	8aug24_Sunkyung_F3-DIA_60spd_S3-E4_1_7163	Pre_D7_CC	4	95	24	0.647059	TRUE	0	CAVN1_HUMAN	Q6NZI2	FALSE	4_Pre_D7_CC
25	7.18617	8aug24_Sunkyung_G3-DIA_60spd_S3-F4_1_7170	Pre_D7_CC	5	95	12	0.823529	TRUE	0	CAVN1_HUMAN	Q6NZI2	FALSE	5_Pre_D7_CC
26	7.35249	8aug24_Sunkyung_C5-DIA_60spd_S3-B6_1_7144	Pre_D7_CM	1	127	12	0.823529	TRUE	0	CAVN1_HUMAN	Q6NZI2	FALSE	1_Pre_D7_CM
28	7.14412	8aug24_Sunkyung_E5-DIA_60spd_S3-D6_1_7158	Pre_D7_CM	3	127	23	0.661765	TRUE	0	CAVN1_HUMAN	Q6NZI2	FALSE	3_Pre_D7_CM
29	8.12869	8aug24_Sunkyung_F5-DIA_60spd_S3-E6_1_7165	Pre_D7_CM	4	127	58	0.147059	FALSE	0	CAVN1_HUMAN	Q6NZI2	FALSE	4_Pre_D7_CM
30	7.7749	8aug24_Sunkyung_G5-DIA_60spd_S3-F6_1_7172	Pre_D7_CM	5	127	34	0.5	TRUE	0	CAVN1_HUMAN	Q6NZI2	FALSE	5_Pre_D7_CM
2	6.59698	8aug24_Sunkyung_D2-DIA_60spd_S3-C3_1_7148	Post_D0	7	36	12	0	FALSE	0	CAVN2_HUMAN	O95810	FALSE	7_Post_D0
3	7.86538	8aug24_Sunkyung_E2-DIA_60spd_S3-D3_1_7155	Post_D0	8	36	12	0	FALSE	0	CAVN2_HUMAN	O95810	FALSE	8_Post_D0
4	7.12674	8aug24_Sunkyung_F2-DIA_60spd_S3-E3_1_7162	Post_D0	9	36	12	0	FALSE	0	CAVN2_HUMAN	O95810	FALSE	9_Post_D0
7	6.79359	8aug24_Sunkyung_D4-DIA_60spd_S3-C5_1_7150	Post_D7_CC	7	24	12	0	FALSE	0	CAVN2_HUMAN	O95810	FALSE	7_Post_D7_CC
8	6.25714	8aug24_Sunkyung_E4-DIA_60spd_S3-D5_1_7157	Post_D7_CC	8	24	12	0	FALSE	0	CAVN2_HUMAN	O95810	FALSE	8_Post_D7_CC
13	6.69189	8aug24_Sunkyung_E6-DIA_60spd_S3-D7_1_7159	Post_D7_CM	8	24	12	0	FALSE	0	CAVN2_HUMAN	O95810	FALSE	8_Post_D7_CM
14	6.53748	8aug24_Sunkyung_F6-DIA_60spd_S3-E7_1_7166	Post_D7_CM	9	24	12	0	FALSE	0	CAVN2_HUMAN	O95810	FALSE	9_Post_D7_CM
17	6.37919	8aug24_Sunkyung_D1-DIA_60spd_S3-C2_1_7147	Pre_D0	2	36	12	0	FALSE	0	CAVN2_HUMAN	O95810	FALSE	2_Pre_D0
18	7.51626	8aug24_Sunkyung_E1-DIA_60spd_S3-D2_1_7154	Pre_D0	3	36	12	0	FALSE	0	CAVN2_HUMAN	O95810	FALSE	3_Pre_D0
20	6.24373	8aug24_Sunkyung_G1-DIA_60spd_S3-F2_1_7168	Pre_D0	5	36	12	0	FALSE	0	CAVN2_HUMAN	O95810	FALSE	5_Pre_D0
21	6.37582	8aug24_Sunkyung_C3-DIA_60spd_S3-B4_1_7142	Pre_D7_CC	1	48	12	0	FALSE	0	CAVN2_HUMAN	O95810	FALSE	1_Pre_D7_CC
22	7.24341	8aug24_Sunkyung_D3-DIA_60spd_S3-C4_1_7149	Pre_D7_CC	2	48	12	0	FALSE	0	CAVN2_HUMAN	O95810	FALSE	2_Pre_D7_CC
23	6.88964	8aug24_Sunkyung_E3-DIA_60spd_S3-D4_1_7156	Pre_D7_CC	3	48	12	0	FALSE	0	CAVN2_HUMAN	O95810	FALSE	3_Pre_D7_CC
25	6.01791	8aug24_Sunkyung_G3-DIA_60spd_S3-F4_1_7170	Pre_D7_CC	5	48	12	0	FALSE	0	CAVN2_HUMAN	O95810	FALSE	5_Pre_D7_CC
27	6.22153	8aug24_Sunkyung_D5-DIA_60spd_S3-C6_1_7151	Pre_D7_CM	2	48	12	0	FALSE	0	CAVN2_HUMAN	O95810	FALSE	2_Pre_D7_CM
28	6.75114	8aug24_Sunkyung_E5-DIA_60spd_S3-D6_1_7158	Pre_D7_CM	3	48	12	0	FALSE	0	CAVN2_HUMAN	O95810	FALSE	3_Pre_D7_CM
29	7.38542	8aug24_Sunkyung_F5-DIA_60spd_S3-E6_1_7165	Pre_D7_CM	4	48	12	0	FALSE	0	CAVN2_HUMAN	O95810	FALSE	4_Pre_D7_CM
30	6.90261	8aug24_Sunkyung_G5-DIA_60spd_S3-F6_1_7172	Pre_D7_CM	5	48	12	0	FALSE	0	CAVN2_HUMAN	O95810	FALSE	5_Pre_D7_CM
1	5.92924	8aug24_Sunkyung_C2-DIA_60spd_S3-B3_1_7141	Post_D0	6	77	10	0.72973	TRUE	0	CAZA1_HUMAN	P52907	FALSE	6_Post_D0
2	5.94239	8aug24_Sunkyung_D2-DIA_60spd_S3-C3_1_7148	Post_D0	7	77	10	0.72973	TRUE	0	CAZA1_HUMAN	P52907	FALSE	7_Post_D0
3	6.18931	8aug24_Sunkyung_E2-DIA_60spd_S3-D3_1_7155	Post_D0	8	77	29	0.216216	FALSE	0	CAZA1_HUMAN	P52907	FALSE	8_Post_D0
4	6.12259	8aug24_Sunkyung_F2-DIA_60spd_S3-E3_1_7162	Post_D0	9	77	18	0.513514	TRUE	0	CAZA1_HUMAN	P52907	FALSE	9_Post_D0
5	5.72842	8aug24_Sunkyung_G2-DIA_60spd_S3-F3_1_7169	Post_D0	10	77	10	0.72973	TRUE	0	CAZA1_HUMAN	P52907	FALSE	10_Post_D0
6	5.92924	8aug24_Sunkyung_C4-DIA_60spd_S3-B5_1_7143	Post_D7_CC	6	50	10	0.72973	TRUE	0	CAZA1_HUMAN	P52907	FALSE	6_Post_D7_CC
7	5.90178	8aug24_Sunkyung_D4-DIA_60spd_S3-C5_1_7150	Post_D7_CC	7	50	10	0.72973	TRUE	0	CAZA1_HUMAN	P52907	FALSE	7_Post_D7_CC
8	5.555	8aug24_Sunkyung_E4-DIA_60spd_S3-D5_1_7157	Post_D7_CC	8	50	10	0.72973	TRUE	0	CAZA1_HUMAN	P52907	FALSE	8_Post_D7_CC
9	5.9447	8aug24_Sunkyung_F4-DIA_60spd_S3-E5_1_7164	Post_D7_CC	9	50	10	0.72973	TRUE	0	CAZA1_HUMAN	P52907	FALSE	9_Post_D7_CC
10	6.98064	8aug24_Sunkyung_G4-DIA_60spd_S3-F5_1_7171	Post_D7_CC	10	50	10	0.72973	TRUE	0	CAZA1_HUMAN	P52907	FALSE	10_Post_D7_CC
12	7.39088	8aug24_Sunkyung_D6-DIA_60spd_S3-C7_1_7152	Post_D7_CM	7	84	37	0	FALSE	0	CAZA1_HUMAN	P52907	FALSE	7_Post_D7_CM
13	0.571438	8aug24_Sunkyung_E6-DIA_60spd_S3-D7_1_7159	Post_D7_CM	8	84	8	0.783784	TRUE	0	CAZA1_HUMAN	P52907	FALSE	8_Post_D7_CM
14	6.9746	8aug24_Sunkyung_F6-DIA_60spd_S3-E7_1_7166	Post_D7_CM	9	84	29	0.216216	FALSE	0	CAZA1_HUMAN	P52907	FALSE	9_Post_D7_CM
15	5.8852	8aug24_Sunkyung_G6-DIA_60spd_S3-F7_1_7173	Post_D7_CM	10	84	10	0.72973	TRUE	0	CAZA1_HUMAN	P52907	FALSE	10_Post_D7_CM
16	6.97559	8aug24_Sunkyung_C1b-DIA_60spd_S3-B2_1_7140	Pre_D0	1	107	10	0.72973	TRUE	0	CAZA1_HUMAN	P52907	FALSE	1_Pre_D0
17	5.95247	8aug24_Sunkyung_D1-DIA_60spd_S3-C2_1_7147	Pre_D0	2	107	21	0.432432	FALSE	0	CAZA1_HUMAN	P52907	FALSE	2_Pre_D0
18	6.04763	8aug24_Sunkyung_E1-DIA_60spd_S3-D2_1_7154	Pre_D0	3	107	29	0.216216	FALSE	0	CAZA1_HUMAN	P52907	FALSE	3_Pre_D0
19	5.93988	8aug24_Sunkyung_F1-DIA_60spd_S3-E2_1_7161	Pre_D0	4	107	10	0.72973	TRUE	0	CAZA1_HUMAN	P52907	FALSE	4_Pre_D0
20	6.07728	8aug24_Sunkyung_G1-DIA_60spd_S3-F2_1_7168	Pre_D0	5	107	37	0	FALSE	0	CAZA1_HUMAN	P52907	FALSE	5_Pre_D0
21	6.6331	8aug24_Sunkyung_C3-DIA_60spd_S3-B4_1_7142	Pre_D7_CC	1	61	10	0.72973	TRUE	0	CAZA1_HUMAN	P52907	FALSE	1_Pre_D7_CC
22	5.92924	8aug24_Sunkyung_D3-DIA_60spd_S3-C4_1_7149	Pre_D7_CC	2	61	10	0.72973	TRUE	0	CAZA1_HUMAN	P52907	FALSE	2_Pre_D7_CC
23	5.04524	8aug24_Sunkyung_E3-DIA_60spd_S3-D4_1_7156	Pre_D7_CC	3	61	21	0.432432	FALSE	0	CAZA1_HUMAN	P52907	FALSE	3_Pre_D7_CC
24	6.66871	8aug24_Sunkyung_F3-DIA_60spd_S3-E4_1_7163	Pre_D7_CC	4	61	10	0.72973	TRUE	0	CAZA1_HUMAN	P52907	FALSE	4_Pre_D7_CC
25	5.8852	8aug24_Sunkyung_G3-DIA_60spd_S3-F4_1_7170	Pre_D7_CC	5	61	10	0.72973	TRUE	0	CAZA1_HUMAN	P52907	FALSE	5_Pre_D7_CC
26	5.83496	8aug24_Sunkyung_C5-DIA_60spd_S3-B6_1_7144	Pre_D7_CM	1	96	10	0.72973	TRUE	0	CAZA1_HUMAN	P52907	FALSE	1_Pre_D7_CM
27	5.61636	8aug24_Sunkyung_D5-DIA_60spd_S3-C6_1_7151	Pre_D7_CM	2	96	10	0.72973	TRUE	0	CAZA1_HUMAN	P52907	FALSE	2_Pre_D7_CM
28	5.89864	8aug24_Sunkyung_E5-DIA_60spd_S3-D6_1_7158	Pre_D7_CM	3	96	18	0.513514	TRUE	0	CAZA1_HUMAN	P52907	FALSE	3_Pre_D7_CM
29	6.91493	8aug24_Sunkyung_F5-DIA_60spd_S3-E6_1_7165	Pre_D7_CM	4	96	29	0.216216	FALSE	0	CAZA1_HUMAN	P52907	FALSE	4_Pre_D7_CM
30	5.02282	8aug24_Sunkyung_G5-DIA_60spd_S3-F6_1_7172	Pre_D7_CM	5	96	29	0.216216	FALSE	0	CAZA1_HUMAN	P52907	FALSE	5_Pre_D7_CM
3	7.57707	8aug24_Sunkyung_E2-DIA_60spd_S3-D3_1_7155	Post_D0	8	15	15	0.615385	TRUE	0	CBPA4_HUMAN	Q9UI42	FALSE	8_Post_D0
6	7.44329	8aug24_Sunkyung_C4-DIA_60spd_S3-B5_1_7143	Post_D7_CC	6	54	27	0.307692	FALSE	0	CBPA4_HUMAN	Q9UI42	FALSE	6_Post_D7_CC
7	7.12459	8aug24_Sunkyung_D4-DIA_60spd_S3-C5_1_7150	Post_D7_CC	7	54	19	0.512821	TRUE	0	CBPA4_HUMAN	Q9UI42	FALSE	7_Post_D7_CC
10	8.59405	8aug24_Sunkyung_G4-DIA_60spd_S3-F5_1_7171	Post_D7_CC	10	54	8	0.794872	TRUE	0	CBPA4_HUMAN	Q9UI42	FALSE	10_Post_D7_CC
11	7.15736	8aug24_Sunkyung_C6-DIA_60spd_S3-B7_1_7145	Post_D7_CM	6	92	12	0.692308	TRUE	0	CBPA4_HUMAN	Q9UI42	FALSE	6_Post_D7_CM
12	8.57109	8aug24_Sunkyung_D6-DIA_60spd_S3-C7_1_7152	Post_D7_CM	7	92	39	0	FALSE	0	CBPA4_HUMAN	Q9UI42	FALSE	7_Post_D7_CM
13	7.91006	8aug24_Sunkyung_E6-DIA_60spd_S3-D7_1_7159	Post_D7_CM	8	92	9	0.769231	TRUE	0	CBPA4_HUMAN	Q9UI42	FALSE	8_Post_D7_CM
14	7.08714	8aug24_Sunkyung_F6-DIA_60spd_S3-E7_1_7166	Post_D7_CM	9	92	23	0.410256	FALSE	0	CBPA4_HUMAN	Q9UI42	FALSE	9_Post_D7_CM
15	1.85116	8aug24_Sunkyung_G6-DIA_60spd_S3-F7_1_7173	Post_D7_CM	10	92	9	0.769231	TRUE	0	CBPA4_HUMAN	Q9UI42	FALSE	10_Post_D7_CM
17	6.65082	8aug24_Sunkyung_D1-DIA_60spd_S3-C2_1_7147	Pre_D0	2	24	12	0.692308	TRUE	0	CBPA4_HUMAN	Q9UI42	FALSE	2_Pre_D0
18	7.12411	8aug24_Sunkyung_E1-DIA_60spd_S3-D2_1_7154	Pre_D0	3	24	12	0.692308	TRUE	0	CBPA4_HUMAN	Q9UI42	FALSE	3_Pre_D0
24	6.98193	8aug24_Sunkyung_F3-DIA_60spd_S3-E4_1_7163	Pre_D7_CC	4	13	4	0.897436	TRUE	0	CBPA4_HUMAN	Q9UI42	FALSE	4_Pre_D7_CC
25	6.58792	8aug24_Sunkyung_G3-DIA_60spd_S3-F4_1_7170	Pre_D7_CC	5	13	9	0.769231	TRUE	0	CBPA4_HUMAN	Q9UI42	FALSE	5_Pre_D7_CC
26	7.53253	8aug24_Sunkyung_C5-DIA_60spd_S3-B6_1_7144	Pre_D7_CM	1	17	17	0.564103	TRUE	0	CBPA4_HUMAN	Q9UI42	FALSE	1_Pre_D7_CM
2	6.69025	8aug24_Sunkyung_D2-DIA_60spd_S3-C3_1_7148	Post_D0	7	80	9	0.709677	TRUE	0	CBPZ_HUMAN	Q66K79	FALSE	7_Post_D0
3	7.13572	8aug24_Sunkyung_E2-DIA_60spd_S3-D3_1_7155	Post_D0	8	80	31	0	FALSE	0	CBPZ_HUMAN	Q66K79	FALSE	8_Post_D0
4	7.03563	8aug24_Sunkyung_F2-DIA_60spd_S3-E3_1_7162	Post_D0	9	80	31	0	FALSE	0	CBPZ_HUMAN	Q66K79	FALSE	9_Post_D0
5	7.10239	8aug24_Sunkyung_G2-DIA_60spd_S3-F3_1_7169	Post_D0	10	80	9	0.709677	TRUE	0	CBPZ_HUMAN	Q66K79	FALSE	10_Post_D0
6	6.69025	8aug24_Sunkyung_C4-DIA_60spd_S3-B5_1_7143	Post_D7_CC	6	49	19	0.387097	FALSE	0	CBPZ_HUMAN	Q66K79	FALSE	6_Post_D7_CC
8	6.30816	8aug24_Sunkyung_E4-DIA_60spd_S3-D5_1_7157	Post_D7_CC	8	49	21	0.322581	FALSE	0	CBPZ_HUMAN	Q66K79	FALSE	8_Post_D7_CC
9	6.69025	8aug24_Sunkyung_F4-DIA_60spd_S3-E5_1_7164	Post_D7_CC	9	49	9	0.709677	TRUE	0	CBPZ_HUMAN	Q66K79	FALSE	9_Post_D7_CC
13	6.69025	8aug24_Sunkyung_E6-DIA_60spd_S3-D7_1_7159	Post_D7_CM	8	19	9	0.709677	TRUE	0	CBPZ_HUMAN	Q66K79	FALSE	8_Post_D7_CM
14	5.81967	8aug24_Sunkyung_F6-DIA_60spd_S3-E7_1_7166	Post_D7_CM	9	19	10	0.677419	TRUE	0	CBPZ_HUMAN	Q66K79	FALSE	9_Post_D7_CM
16	7.05046	8aug24_Sunkyung_C1b-DIA_60spd_S3-B2_1_7140	Pre_D0	1	73	9	0.709677	TRUE	0	CBPZ_HUMAN	Q66K79	FALSE	1_Pre_D0
17	6.99359	8aug24_Sunkyung_D1-DIA_60spd_S3-C2_1_7147	Pre_D0	2	73	21	0.322581	FALSE	0	CBPZ_HUMAN	Q66K79	FALSE	2_Pre_D0
18	7.5246	8aug24_Sunkyung_E1-DIA_60spd_S3-D2_1_7154	Pre_D0	3	73	31	0	FALSE	0	CBPZ_HUMAN	Q66K79	FALSE	3_Pre_D0
20	6.24484	8aug24_Sunkyung_G1-DIA_60spd_S3-F2_1_7168	Pre_D0	5	73	12	0.612903	TRUE	0	CBPZ_HUMAN	Q66K79	FALSE	5_Pre_D0
21	6.32091	8aug24_Sunkyung_C3-DIA_60spd_S3-B4_1_7142	Pre_D7_CC	1	65	31	0	FALSE	0	CBPZ_HUMAN	Q66K79	FALSE	1_Pre_D7_CC
22	6.95741	8aug24_Sunkyung_D3-DIA_60spd_S3-C4_1_7149	Pre_D7_CC	2	65	12	0.612903	TRUE	0	CBPZ_HUMAN	Q66K79	FALSE	2_Pre_D7_CC
23	6.30816	8aug24_Sunkyung_E3-DIA_60spd_S3-D4_1_7156	Pre_D7_CC	3	65	22	0.290323	FALSE	0	CBPZ_HUMAN	Q66K79	FALSE	3_Pre_D7_CC
26	6.47175	8aug24_Sunkyung_C5-DIA_60spd_S3-B6_1_7144	Pre_D7_CM	1	51	21	0.322581	FALSE	0	CBPZ_HUMAN	Q66K79	FALSE	1_Pre_D7_CM
28	6.82394	8aug24_Sunkyung_E5-DIA_60spd_S3-D6_1_7158	Pre_D7_CM	3	51	12	0.612903	TRUE	0	CBPZ_HUMAN	Q66K79	FALSE	3_Pre_D7_CM
29	6.27564	8aug24_Sunkyung_F5-DIA_60spd_S3-E6_1_7165	Pre_D7_CM	4	51	9	0.709677	TRUE	0	CBPZ_HUMAN	Q66K79	FALSE	4_Pre_D7_CM
30	6.55398	8aug24_Sunkyung_G5-DIA_60spd_S3-F6_1_7172	Pre_D7_CM	5	51	9	0.709677	TRUE	0	CBPZ_HUMAN	Q66K79	FALSE	5_Pre_D7_CM
2	7.34795	8aug24_Sunkyung_D2-DIA_60spd_S3-C3_1_7148	Post_D0	7	151	44	0.153846	FALSE	0	CBR1_HUMAN	P16152	FALSE	7_Post_D0
3	7.45582	8aug24_Sunkyung_E2-DIA_60spd_S3-D3_1_7155	Post_D0	8	151	44	0.153846	FALSE	0	CBR1_HUMAN	P16152	FALSE	8_Post_D0
4	6.85054	8aug24_Sunkyung_F2-DIA_60spd_S3-E3_1_7162	Post_D0	9	151	29	0.442308	FALSE	0	CBR1_HUMAN	P16152	FALSE	9_Post_D0
5	7.03707	8aug24_Sunkyung_G2-DIA_60spd_S3-F3_1_7169	Post_D0	10	151	34	0.346154	FALSE	0	CBR1_HUMAN	P16152	FALSE	10_Post_D0
7	0.426842	8aug24_Sunkyung_D4-DIA_60spd_S3-C5_1_7150	Post_D7_CC	7	55	11	0.788462	TRUE	0	CBR1_HUMAN	P16152	FALSE	7_Post_D7_CC
8	6.99936	8aug24_Sunkyung_E4-DIA_60spd_S3-D5_1_7157	Post_D7_CC	8	55	44	0.153846	FALSE	0	CBR1_HUMAN	P16152	FALSE	8_Post_D7_CC
12	8.25501	8aug24_Sunkyung_D6-DIA_60spd_S3-C7_1_7152	Post_D7_CM	7	138	52	0	FALSE	0	CBR1_HUMAN	P16152	FALSE	7_Post_D7_CM
13	7.29679	8aug24_Sunkyung_E6-DIA_60spd_S3-D7_1_7159	Post_D7_CM	8	138	44	0.153846	FALSE	0	CBR1_HUMAN	P16152	FALSE	8_Post_D7_CM
14	8.01396	8aug24_Sunkyung_F6-DIA_60spd_S3-E7_1_7166	Post_D7_CM	9	138	42	0.192308	FALSE	0	CBR1_HUMAN	P16152	FALSE	9_Post_D7_CM
16	7.91361	8aug24_Sunkyung_C1b-DIA_60spd_S3-B2_1_7140	Pre_D0	1	119	34	0.346154	FALSE	0	CBR1_HUMAN	P16152	FALSE	1_Pre_D0
18	7.19983	8aug24_Sunkyung_E1-DIA_60spd_S3-D2_1_7154	Pre_D0	3	119	33	0.365385	FALSE	0	CBR1_HUMAN	P16152	FALSE	3_Pre_D0
20	7.61757	8aug24_Sunkyung_G1-DIA_60spd_S3-F2_1_7168	Pre_D0	5	119	52	0	FALSE	0	CBR1_HUMAN	P16152	FALSE	5_Pre_D0
21	6.33251	8aug24_Sunkyung_C3-DIA_60spd_S3-B4_1_7142	Pre_D7_CC	1	55	12	0.769231	TRUE	0	CBR1_HUMAN	P16152	FALSE	1_Pre_D7_CC
23	7.01717	8aug24_Sunkyung_E3-DIA_60spd_S3-D4_1_7156	Pre_D7_CC	3	55	32	0.384615	FALSE	0	CBR1_HUMAN	P16152	FALSE	3_Pre_D7_CC
24	7.28026	8aug24_Sunkyung_F3-DIA_60spd_S3-E4_1_7163	Pre_D7_CC	4	55	11	0.788462	TRUE	0	CBR1_HUMAN	P16152	FALSE	4_Pre_D7_CC
26	6.35906	8aug24_Sunkyung_C5-DIA_60spd_S3-B6_1_7144	Pre_D7_CM	1	126	23	0.557692	TRUE	0	CBR1_HUMAN	P16152	FALSE	1_Pre_D7_CM
27	7.92528	8aug24_Sunkyung_D5-DIA_60spd_S3-C6_1_7151	Pre_D7_CM	2	126	12	0.769231	TRUE	0	CBR1_HUMAN	P16152	FALSE	2_Pre_D7_CM
28	7.66757	8aug24_Sunkyung_E5-DIA_60spd_S3-D6_1_7158	Pre_D7_CM	3	126	23	0.557692	TRUE	0	CBR1_HUMAN	P16152	FALSE	3_Pre_D7_CM
29	7.88631	8aug24_Sunkyung_F5-DIA_60spd_S3-E6_1_7165	Pre_D7_CM	4	126	34	0.346154	FALSE	0	CBR1_HUMAN	P16152	FALSE	4_Pre_D7_CM
30	7.71849	8aug24_Sunkyung_G5-DIA_60spd_S3-F6_1_7172	Pre_D7_CM	5	126	34	0.346154	FALSE	0	CBR1_HUMAN	P16152	FALSE	5_Pre_D7_CM
1	6.37966	8aug24_Sunkyung_C2-DIA_60spd_S3-B3_1_7141	Post_D0	6	207	12	0.815385	TRUE	0	CCD80_HUMAN	Q76M96	FALSE	6_Post_D0
2	6.69774	8aug24_Sunkyung_D2-DIA_60spd_S3-C3_1_7148	Post_D0	7	207	55	0.153846	FALSE	0	CCD80_HUMAN	Q76M96	FALSE	7_Post_D0
3	7.5349	8aug24_Sunkyung_E2-DIA_60spd_S3-D3_1_7155	Post_D0	8	207	65	0	FALSE	0	CCD80_HUMAN	Q76M96	FALSE	8_Post_D0
4	7.40871	8aug24_Sunkyung_F2-DIA_60spd_S3-E3_1_7162	Post_D0	9	207	65	0	FALSE	0	CCD80_HUMAN	Q76M96	FALSE	9_Post_D0
5	6.28808	8aug24_Sunkyung_G2-DIA_60spd_S3-F3_1_7169	Post_D0	10	207	10	0.846154	TRUE	0	CCD80_HUMAN	Q76M96	FALSE	10_Post_D0
6	6.61504	8aug24_Sunkyung_C4-DIA_60spd_S3-B5_1_7143	Post_D7_CC	6	75	55	0.153846	FALSE	0	CCD80_HUMAN	Q76M96	FALSE	6_Post_D7_CC
8	6.35546	8aug24_Sunkyung_E4-DIA_60spd_S3-D5_1_7157	Post_D7_CC	8	75	12	0.815385	TRUE	0	CCD80_HUMAN	Q76M96	FALSE	8_Post_D7_CC
9	5.32662	8aug24_Sunkyung_F4-DIA_60spd_S3-E5_1_7164	Post_D7_CC	9	75	8	0.876923	TRUE	0	CCD80_HUMAN	Q76M96	FALSE	9_Post_D7_CC
11	1.22309	8aug24_Sunkyung_C6-DIA_60spd_S3-B7_1_7145	Post_D7_CM	6	169	12	0.815385	TRUE	0	CCD80_HUMAN	Q76M96	FALSE	6_Post_D7_CM
12	6.33677	8aug24_Sunkyung_D6-DIA_60spd_S3-C7_1_7152	Post_D7_CM	7	169	33	0.492308	FALSE	0	CCD80_HUMAN	Q76M96	FALSE	7_Post_D7_CM
13	7.44513	8aug24_Sunkyung_E6-DIA_60spd_S3-D7_1_7159	Post_D7_CM	8	169	47	0.276923	FALSE	0	CCD80_HUMAN	Q76M96	FALSE	8_Post_D7_CM
14	6.45596	8aug24_Sunkyung_F6-DIA_60spd_S3-E7_1_7166	Post_D7_CM	9	169	54	0.169231	FALSE	0	CCD80_HUMAN	Q76M96	FALSE	9_Post_D7_CM
15	6.92317	8aug24_Sunkyung_G6-DIA_60spd_S3-F7_1_7173	Post_D7_CM	10	169	23	0.646154	TRUE	0	CCD80_HUMAN	Q76M96	FALSE	10_Post_D7_CM
16	7.05878	8aug24_Sunkyung_C1b-DIA_60spd_S3-B2_1_7140	Pre_D0	1	154	54	0.169231	FALSE	0	CCD80_HUMAN	Q76M96	FALSE	1_Pre_D0
17	7.45639	8aug24_Sunkyung_D1-DIA_60spd_S3-C2_1_7147	Pre_D0	2	154	23	0.646154	TRUE	0	CCD80_HUMAN	Q76M96	FALSE	2_Pre_D0
18	6.89703	8aug24_Sunkyung_E1-DIA_60spd_S3-D2_1_7154	Pre_D0	3	154	53	0.184615	FALSE	0	CCD80_HUMAN	Q76M96	FALSE	3_Pre_D0
19	2.85321	8aug24_Sunkyung_F1-DIA_60spd_S3-E2_1_7161	Pre_D0	4	154	12	0.815385	TRUE	0	CCD80_HUMAN	Q76M96	FALSE	4_Pre_D0
20	5.16198	8aug24_Sunkyung_G1-DIA_60spd_S3-F2_1_7168	Pre_D0	5	154	12	0.815385	TRUE	0	CCD80_HUMAN	Q76M96	FALSE	5_Pre_D0
21	7.1259	8aug24_Sunkyung_C3-DIA_60spd_S3-B4_1_7142	Pre_D7_CC	1	93	57	0.123077	FALSE	0	CCD80_HUMAN	Q76M96	FALSE	1_Pre_D7_CC
22	5.98497	8aug24_Sunkyung_D3-DIA_60spd_S3-C4_1_7149	Pre_D7_CC	2	93	12	0.815385	TRUE	0	CCD80_HUMAN	Q76M96	FALSE	2_Pre_D7_CC
23	6.21914	8aug24_Sunkyung_E3-DIA_60spd_S3-D4_1_7156	Pre_D7_CC	3	93	24	0.630769	TRUE	0	CCD80_HUMAN	Q76M96	FALSE	3_Pre_D7_CC
26	7.40233	8aug24_Sunkyung_C5-DIA_60spd_S3-B6_1_7144	Pre_D7_CM	1	205	57	0.123077	FALSE	0	CCD80_HUMAN	Q76M96	FALSE	1_Pre_D7_CM
28	7.00417	8aug24_Sunkyung_E5-DIA_60spd_S3-D6_1_7158	Pre_D7_CM	3	205	57	0.123077	FALSE	0	CCD80_HUMAN	Q76M96	FALSE	3_Pre_D7_CM
29	6.6505	8aug24_Sunkyung_F5-DIA_60spd_S3-E6_1_7165	Pre_D7_CM	4	205	45	0.307692	FALSE	0	CCD80_HUMAN	Q76M96	FALSE	4_Pre_D7_CM
30	6.5921	8aug24_Sunkyung_G5-DIA_60spd_S3-F6_1_7172	Pre_D7_CM	5	205	46	0.292308	FALSE	0	CCD80_HUMAN	Q76M96	FALSE	5_Pre_D7_CM
3	8.54661	8aug24_Sunkyung_E2-DIA_60spd_S3-D3_1_7155	Post_D0	8	22	11	0	FALSE	0	CD248_HUMAN	Q9HCU0	FALSE	8_Post_D0
4	8.95451	8aug24_Sunkyung_F2-DIA_60spd_S3-E3_1_7162	Post_D0	9	22	11	0	FALSE	0	CD248_HUMAN	Q9HCU0	FALSE	9_Post_D0
12	7.6207	8aug24_Sunkyung_D6-DIA_60spd_S3-C7_1_7152	Post_D7_CM	7	22	11	0	FALSE	0	CD248_HUMAN	Q9HCU0	FALSE	7_Post_D7_CM
14	8.08457	8aug24_Sunkyung_F6-DIA_60spd_S3-E7_1_7166	Post_D7_CM	9	22	11	0	FALSE	0	CD248_HUMAN	Q9HCU0	FALSE	9_Post_D7_CM
16	8.42649	8aug24_Sunkyung_C1b-DIA_60spd_S3-B2_1_7140	Pre_D0	1	55	11	0	FALSE	0	CD248_HUMAN	Q9HCU0	FALSE	1_Pre_D0
17	8.58479	8aug24_Sunkyung_D1-DIA_60spd_S3-C2_1_7147	Pre_D0	2	55	11	0	FALSE	0	CD248_HUMAN	Q9HCU0	FALSE	2_Pre_D0
18	8.82976	8aug24_Sunkyung_E1-DIA_60spd_S3-D2_1_7154	Pre_D0	3	55	11	0	FALSE	0	CD248_HUMAN	Q9HCU0	FALSE	3_Pre_D0
19	7.81219	8aug24_Sunkyung_F1-DIA_60spd_S3-E2_1_7161	Pre_D0	4	55	11	0	FALSE	0	CD248_HUMAN	Q9HCU0	FALSE	4_Pre_D0
20	8.46274	8aug24_Sunkyung_G1-DIA_60spd_S3-F2_1_7168	Pre_D0	5	55	11	0	FALSE	0	CD248_HUMAN	Q9HCU0	FALSE	5_Pre_D0
21	8.23917	8aug24_Sunkyung_C3-DIA_60spd_S3-B4_1_7142	Pre_D7_CC	1	22	11	0	FALSE	0	CD248_HUMAN	Q9HCU0	FALSE	1_Pre_D7_CC
22	8.6168	8aug24_Sunkyung_D3-DIA_60spd_S3-C4_1_7149	Pre_D7_CC	2	22	11	0	FALSE	0	CD248_HUMAN	Q9HCU0	FALSE	2_Pre_D7_CC
26	7.8043	8aug24_Sunkyung_C5-DIA_60spd_S3-B6_1_7144	Pre_D7_CM	1	11	11	0	FALSE	0	CD248_HUMAN	Q9HCU0	FALSE	1_Pre_D7_CM
3	7.26445	8aug24_Sunkyung_E2-DIA_60spd_S3-D3_1_7155	Post_D0	8	24	12	0	FALSE	0	CD44_HUMAN	P16070	FALSE	8_Post_D0
4	6.54111	8aug24_Sunkyung_F2-DIA_60spd_S3-E3_1_7162	Post_D0	9	24	12	0	FALSE	0	CD44_HUMAN	P16070	FALSE	9_Post_D0
9	7.63625	8aug24_Sunkyung_F4-DIA_60spd_S3-E5_1_7164	Post_D7_CC	9	24	12	0	FALSE	0	CD44_HUMAN	P16070	FALSE	9_Post_D7_CC
10	7.52232	8aug24_Sunkyung_G4-DIA_60spd_S3-F5_1_7171	Post_D7_CC	10	24	12	0	FALSE	0	CD44_HUMAN	P16070	FALSE	10_Post_D7_CC
13	5.47077	8aug24_Sunkyung_E6-DIA_60spd_S3-D7_1_7159	Post_D7_CM	8	36	12	0	FALSE	0	CD44_HUMAN	P16070	FALSE	8_Post_D7_CM
14	7.90445	8aug24_Sunkyung_F6-DIA_60spd_S3-E7_1_7166	Post_D7_CM	9	36	12	0	FALSE	0	CD44_HUMAN	P16070	FALSE	9_Post_D7_CM
15	6.2873	8aug24_Sunkyung_G6-DIA_60spd_S3-F7_1_7173	Post_D7_CM	10	36	12	0	FALSE	0	CD44_HUMAN	P16070	FALSE	10_Post_D7_CM
16	5.18068	8aug24_Sunkyung_C1b-DIA_60spd_S3-B2_1_7140	Pre_D0	1	36	12	0	FALSE	0	CD44_HUMAN	P16070	FALSE	1_Pre_D0
18	5.99676	8aug24_Sunkyung_E1-DIA_60spd_S3-D2_1_7154	Pre_D0	3	36	12	0	FALSE	0	CD44_HUMAN	P16070	FALSE	3_Pre_D0
20	7.16295	8aug24_Sunkyung_G1-DIA_60spd_S3-F2_1_7168	Pre_D0	5	36	12	0	FALSE	0	CD44_HUMAN	P16070	FALSE	5_Pre_D0
21	6.53051	8aug24_Sunkyung_C3-DIA_60spd_S3-B4_1_7142	Pre_D7_CC	1	48	12	0	FALSE	0	CD44_HUMAN	P16070	FALSE	1_Pre_D7_CC
22	5.66564	8aug24_Sunkyung_D3-DIA_60spd_S3-C4_1_7149	Pre_D7_CC	2	48	12	0	FALSE	0	CD44_HUMAN	P16070	FALSE	2_Pre_D7_CC
23	5.22593	8aug24_Sunkyung_E3-DIA_60spd_S3-D4_1_7156	Pre_D7_CC	3	48	12	0	FALSE	0	CD44_HUMAN	P16070	FALSE	3_Pre_D7_CC
24	8.11141	8aug24_Sunkyung_F3-DIA_60spd_S3-E4_1_7163	Pre_D7_CC	4	48	12	0	FALSE	0	CD44_HUMAN	P16070	FALSE	4_Pre_D7_CC
26	5.86508	8aug24_Sunkyung_C5-DIA_60spd_S3-B6_1_7144	Pre_D7_CM	1	60	12	0	FALSE	0	CD44_HUMAN	P16070	FALSE	1_Pre_D7_CM
27	5.51594	8aug24_Sunkyung_D5-DIA_60spd_S3-C6_1_7151	Pre_D7_CM	2	60	12	0	FALSE	0	CD44_HUMAN	P16070	FALSE	2_Pre_D7_CM
28	5.69881	8aug24_Sunkyung_E5-DIA_60spd_S3-D6_1_7158	Pre_D7_CM	3	60	12	0	FALSE	0	CD44_HUMAN	P16070	FALSE	3_Pre_D7_CM
29	7.61539	8aug24_Sunkyung_F5-DIA_60spd_S3-E6_1_7165	Pre_D7_CM	4	60	12	0	FALSE	0	CD44_HUMAN	P16070	FALSE	4_Pre_D7_CM
30	7.90714	8aug24_Sunkyung_G5-DIA_60spd_S3-F6_1_7172	Pre_D7_CM	5	60	12	0	FALSE	0	CD44_HUMAN	P16070	FALSE	5_Pre_D7_CM
4	2.90009	8aug24_Sunkyung_F2-DIA_60spd_S3-E3_1_7162	Post_D0	9	18	9	0	FALSE	0	CD59_HUMAN	P13987	FALSE	9_Post_D0
5	0.483503	8aug24_Sunkyung_G2-DIA_60spd_S3-F3_1_7169	Post_D0	10	18	9	0	FALSE	0	CD59_HUMAN	P13987	FALSE	10_Post_D0
8	0.485315	8aug24_Sunkyung_E4-DIA_60spd_S3-D5_1_7157	Post_D7_CC	8	9	9	0	FALSE	0	CD59_HUMAN	P13987	FALSE	8_Post_D7_CC
12	3.31724	8aug24_Sunkyung_D6-DIA_60spd_S3-C7_1_7152	Post_D7_CM	7	36	9	0	FALSE	0	CD59_HUMAN	P13987	FALSE	7_Post_D7_CM
13	4.2363	8aug24_Sunkyung_E6-DIA_60spd_S3-D7_1_7159	Post_D7_CM	8	36	9	0	FALSE	0	CD59_HUMAN	P13987	FALSE	8_Post_D7_CM
14	3.89078	8aug24_Sunkyung_F6-DIA_60spd_S3-E7_1_7166	Post_D7_CM	9	36	9	0	FALSE	0	CD59_HUMAN	P13987	FALSE	9_Post_D7_CM
15	0.483503	8aug24_Sunkyung_G6-DIA_60spd_S3-F7_1_7173	Post_D7_CM	10	36	9	0	FALSE	0	CD59_HUMAN	P13987	FALSE	10_Post_D7_CM
17	0.485315	8aug24_Sunkyung_D1-DIA_60spd_S3-C2_1_7147	Pre_D0	2	27	9	0	FALSE	0	CD59_HUMAN	P13987	FALSE	2_Pre_D0
18	0.483503	8aug24_Sunkyung_E1-DIA_60spd_S3-D2_1_7154	Pre_D0	3	27	9	0	FALSE	0	CD59_HUMAN	P13987	FALSE	3_Pre_D0
20	4.54901	8aug24_Sunkyung_G1-DIA_60spd_S3-F2_1_7168	Pre_D0	5	27	9	0	FALSE	0	CD59_HUMAN	P13987	FALSE	5_Pre_D0
24	1.60951	8aug24_Sunkyung_F3-DIA_60spd_S3-E4_1_7163	Pre_D7_CC	4	9	9	0	FALSE	0	CD59_HUMAN	P13987	FALSE	4_Pre_D7_CC
26	1.86358	8aug24_Sunkyung_C5-DIA_60spd_S3-B6_1_7144	Pre_D7_CM	1	27	9	0	FALSE	0	CD59_HUMAN	P13987	FALSE	1_Pre_D7_CM
29	3.63967	8aug24_Sunkyung_F5-DIA_60spd_S3-E6_1_7165	Pre_D7_CM	4	27	9	0	FALSE	0	CD59_HUMAN	P13987	FALSE	4_Pre_D7_CM
30	3.40331	8aug24_Sunkyung_G5-DIA_60spd_S3-F6_1_7172	Pre_D7_CM	5	27	9	0	FALSE	0	CD59_HUMAN	P13987	FALSE	5_Pre_D7_CM
1	7.62596	8aug24_Sunkyung_C2-DIA_60spd_S3-B3_1_7141	Post_D0	6	65	31	0.162162	FALSE	0	CDSN_HUMAN	Q15517	FALSE	6_Post_D0
2	7.24987	8aug24_Sunkyung_D2-DIA_60spd_S3-C3_1_7148	Post_D0	7	65	11	0.702703	TRUE	0	CDSN_HUMAN	Q15517	FALSE	7_Post_D0
5	7.74467	8aug24_Sunkyung_G2-DIA_60spd_S3-F3_1_7169	Post_D0	10	65	23	0.378378	FALSE	0	CDSN_HUMAN	Q15517	FALSE	10_Post_D0
6	7.81894	8aug24_Sunkyung_C4-DIA_60spd_S3-B5_1_7143	Post_D7_CC	6	71	31	0.162162	FALSE	0	CDSN_HUMAN	Q15517	FALSE	6_Post_D7_CC
7	6.88075	8aug24_Sunkyung_D4-DIA_60spd_S3-C5_1_7150	Post_D7_CC	7	71	23	0.378378	FALSE	0	CDSN_HUMAN	Q15517	FALSE	7_Post_D7_CC
8	6.12173	8aug24_Sunkyung_E4-DIA_60spd_S3-D5_1_7157	Post_D7_CC	8	71	11	0.702703	TRUE	0	CDSN_HUMAN	Q15517	FALSE	8_Post_D7_CC
9	7.77051	8aug24_Sunkyung_F4-DIA_60spd_S3-E5_1_7164	Post_D7_CC	9	71	6	0.837838	TRUE	0	CDSN_HUMAN	Q15517	FALSE	9_Post_D7_CC
11	7.44197	8aug24_Sunkyung_C6-DIA_60spd_S3-B7_1_7145	Post_D7_CM	6	106	29	0.216216	FALSE	0	CDSN_HUMAN	Q15517	FALSE	6_Post_D7_CM
12	10.1801	8aug24_Sunkyung_D6-DIA_60spd_S3-C7_1_7152	Post_D7_CM	7	106	37	0	FALSE	0	CDSN_HUMAN	Q15517	FALSE	7_Post_D7_CM
14	8.64665	8aug24_Sunkyung_F6-DIA_60spd_S3-E7_1_7166	Post_D7_CM	9	106	29	0.216216	FALSE	0	CDSN_HUMAN	Q15517	FALSE	9_Post_D7_CM
15	6.02916	8aug24_Sunkyung_G6-DIA_60spd_S3-F7_1_7173	Post_D7_CM	10	106	11	0.702703	TRUE	0	CDSN_HUMAN	Q15517	FALSE	10_Post_D7_CM
16	6.52811	8aug24_Sunkyung_C1b-DIA_60spd_S3-B2_1_7140	Pre_D0	1	48	12	0.675676	TRUE	0	CDSN_HUMAN	Q15517	FALSE	1_Pre_D0
17	6.80422	8aug24_Sunkyung_D1-DIA_60spd_S3-C2_1_7147	Pre_D0	2	48	12	0.675676	TRUE	0	CDSN_HUMAN	Q15517	FALSE	2_Pre_D0
18	6.72376	8aug24_Sunkyung_E1-DIA_60spd_S3-D2_1_7154	Pre_D0	3	48	12	0.675676	TRUE	0	CDSN_HUMAN	Q15517	FALSE	3_Pre_D0
19	6.99578	8aug24_Sunkyung_F1-DIA_60spd_S3-E2_1_7161	Pre_D0	4	48	12	0.675676	TRUE	0	CDSN_HUMAN	Q15517	FALSE	4_Pre_D0
21	7.01992	8aug24_Sunkyung_C3-DIA_60spd_S3-B4_1_7142	Pre_D7_CC	1	69	23	0.378378	FALSE	0	CDSN_HUMAN	Q15517	FALSE	1_Pre_D7_CC
22	6.66943	8aug24_Sunkyung_D3-DIA_60spd_S3-C4_1_7149	Pre_D7_CC	2	69	11	0.702703	TRUE	0	CDSN_HUMAN	Q15517	FALSE	2_Pre_D7_CC
24	6.49195	8aug24_Sunkyung_F3-DIA_60spd_S3-E4_1_7163	Pre_D7_CC	4	69	12	0.675676	TRUE	0	CDSN_HUMAN	Q15517	FALSE	4_Pre_D7_CC
25	7.07796	8aug24_Sunkyung_G3-DIA_60spd_S3-F4_1_7170	Pre_D7_CC	5	69	23	0.378378	FALSE	0	CDSN_HUMAN	Q15517	FALSE	5_Pre_D7_CC
26	6.49413	8aug24_Sunkyung_C5-DIA_60spd_S3-B6_1_7144	Pre_D7_CM	1	34	11	0.702703	TRUE	0	CDSN_HUMAN	Q15517	FALSE	1_Pre_D7_CM
27	6.66943	8aug24_Sunkyung_D5-DIA_60spd_S3-C6_1_7151	Pre_D7_CM	2	34	11	0.702703	TRUE	0	CDSN_HUMAN	Q15517	FALSE	2_Pre_D7_CM
29	6.70119	8aug24_Sunkyung_F5-DIA_60spd_S3-E6_1_7165	Pre_D7_CM	4	34	12	0.675676	TRUE	0	CDSN_HUMAN	Q15517	FALSE	4_Pre_D7_CM
1	6.16277	8aug24_Sunkyung_C2-DIA_60spd_S3-B3_1_7141	Post_D0	6	60	12	0	FALSE	0	CFA99_HUMAN	D6REC4	FALSE	6_Post_D0
2	4.5523	8aug24_Sunkyung_D2-DIA_60spd_S3-C3_1_7148	Post_D0	7	60	12	0	FALSE	0	CFA99_HUMAN	D6REC4	FALSE	7_Post_D0
3	4.20915	8aug24_Sunkyung_E2-DIA_60spd_S3-D3_1_7155	Post_D0	8	60	12	0	FALSE	0	CFA99_HUMAN	D6REC4	FALSE	8_Post_D0
4	4.24856	8aug24_Sunkyung_F2-DIA_60spd_S3-E3_1_7162	Post_D0	9	60	12	0	FALSE	0	CFA99_HUMAN	D6REC4	FALSE	9_Post_D0
5	6.4147	8aug24_Sunkyung_G2-DIA_60spd_S3-F3_1_7169	Post_D0	10	60	12	0	FALSE	0	CFA99_HUMAN	D6REC4	FALSE	10_Post_D0
6	4.6542	8aug24_Sunkyung_C4-DIA_60spd_S3-B5_1_7143	Post_D7_CC	6	48	12	0	FALSE	0	CFA99_HUMAN	D6REC4	FALSE	6_Post_D7_CC
7	7.55353	8aug24_Sunkyung_D4-DIA_60spd_S3-C5_1_7150	Post_D7_CC	7	48	12	0	FALSE	0	CFA99_HUMAN	D6REC4	FALSE	7_Post_D7_CC
8	5.6461	8aug24_Sunkyung_E4-DIA_60spd_S3-D5_1_7157	Post_D7_CC	8	48	12	0	FALSE	0	CFA99_HUMAN	D6REC4	FALSE	8_Post_D7_CC
9	4.78666	8aug24_Sunkyung_F4-DIA_60spd_S3-E5_1_7164	Post_D7_CC	9	48	12	0	FALSE	0	CFA99_HUMAN	D6REC4	FALSE	9_Post_D7_CC
11	6.4303	8aug24_Sunkyung_C6-DIA_60spd_S3-B7_1_7145	Post_D7_CM	6	48	12	0	FALSE	0	CFA99_HUMAN	D6REC4	FALSE	6_Post_D7_CM
12	5.76446	8aug24_Sunkyung_D6-DIA_60spd_S3-C7_1_7152	Post_D7_CM	7	48	12	0	FALSE	0	CFA99_HUMAN	D6REC4	FALSE	7_Post_D7_CM
13	6.37729	8aug24_Sunkyung_E6-DIA_60spd_S3-D7_1_7159	Post_D7_CM	8	48	12	0	FALSE	0	CFA99_HUMAN	D6REC4	FALSE	8_Post_D7_CM
14	7.153	8aug24_Sunkyung_F6-DIA_60spd_S3-E7_1_7166	Post_D7_CM	9	48	12	0	FALSE	0	CFA99_HUMAN	D6REC4	FALSE	9_Post_D7_CM
17	5.85014	8aug24_Sunkyung_D1-DIA_60spd_S3-C2_1_7147	Pre_D0	2	48	12	0	FALSE	0	CFA99_HUMAN	D6REC4	FALSE	2_Pre_D0
18	3.40127	8aug24_Sunkyung_E1-DIA_60spd_S3-D2_1_7154	Pre_D0	3	48	12	0	FALSE	0	CFA99_HUMAN	D6REC4	FALSE	3_Pre_D0
19	6.3427	8aug24_Sunkyung_F1-DIA_60spd_S3-E2_1_7161	Pre_D0	4	48	12	0	FALSE	0	CFA99_HUMAN	D6REC4	FALSE	4_Pre_D0
20	4.24806	8aug24_Sunkyung_G1-DIA_60spd_S3-F2_1_7168	Pre_D0	5	48	12	0	FALSE	0	CFA99_HUMAN	D6REC4	FALSE	5_Pre_D0
21	5.63613	8aug24_Sunkyung_C3-DIA_60spd_S3-B4_1_7142	Pre_D7_CC	1	60	12	0	FALSE	0	CFA99_HUMAN	D6REC4	FALSE	1_Pre_D7_CC
22	5.60543	8aug24_Sunkyung_D3-DIA_60spd_S3-C4_1_7149	Pre_D7_CC	2	60	12	0	FALSE	0	CFA99_HUMAN	D6REC4	FALSE	2_Pre_D7_CC
23	4.78882	8aug24_Sunkyung_E3-DIA_60spd_S3-D4_1_7156	Pre_D7_CC	3	60	12	0	FALSE	0	CFA99_HUMAN	D6REC4	FALSE	3_Pre_D7_CC
24	4.35391	8aug24_Sunkyung_F3-DIA_60spd_S3-E4_1_7163	Pre_D7_CC	4	60	12	0	FALSE	0	CFA99_HUMAN	D6REC4	FALSE	4_Pre_D7_CC
25	4.95143	8aug24_Sunkyung_G3-DIA_60spd_S3-F4_1_7170	Pre_D7_CC	5	60	12	0	FALSE	0	CFA99_HUMAN	D6REC4	FALSE	5_Pre_D7_CC
26	4.25745	8aug24_Sunkyung_C5-DIA_60spd_S3-B6_1_7144	Pre_D7_CM	1	36	12	0	FALSE	0	CFA99_HUMAN	D6REC4	FALSE	1_Pre_D7_CM
27	5.40987	8aug24_Sunkyung_D5-DIA_60spd_S3-C6_1_7151	Pre_D7_CM	2	36	12	0	FALSE	0	CFA99_HUMAN	D6REC4	FALSE	2_Pre_D7_CM
29	4.47124	8aug24_Sunkyung_F5-DIA_60spd_S3-E6_1_7165	Pre_D7_CM	4	36	12	0	FALSE	0	CFA99_HUMAN	D6REC4	FALSE	4_Pre_D7_CM
4	7.42414	8aug24_Sunkyung_F2-DIA_60spd_S3-E3_1_7162	Post_D0	9	12	12	0	FALSE	0	CFAB_HUMAN	P00751	FALSE	9_Post_D0
6	6.13386	8aug24_Sunkyung_C4-DIA_60spd_S3-B5_1_7143	Post_D7_CC	6	12	12	0	FALSE	0	CFAB_HUMAN	P00751	FALSE	6_Post_D7_CC
11	0.487609	8aug24_Sunkyung_C6-DIA_60spd_S3-B7_1_7145	Post_D7_CM	6	24	12	0	FALSE	0	CFAB_HUMAN	P00751	FALSE	6_Post_D7_CM
12	5.23237	8aug24_Sunkyung_D6-DIA_60spd_S3-C7_1_7152	Post_D7_CM	7	24	12	0	FALSE	0	CFAB_HUMAN	P00751	FALSE	7_Post_D7_CM
17	6.60996	8aug24_Sunkyung_D1-DIA_60spd_S3-C2_1_7147	Pre_D0	2	24	12	0	FALSE	0	CFAB_HUMAN	P00751	FALSE	2_Pre_D0
18	6.28178	8aug24_Sunkyung_E1-DIA_60spd_S3-D2_1_7154	Pre_D0	3	24	12	0	FALSE	0	CFAB_HUMAN	P00751	FALSE	3_Pre_D0
21	6.2553	8aug24_Sunkyung_C3-DIA_60spd_S3-B4_1_7142	Pre_D7_CC	1	12	12	0	FALSE	0	CFAB_HUMAN	P00751	FALSE	1_Pre_D7_CC
26	6.75611	8aug24_Sunkyung_C5-DIA_60spd_S3-B6_1_7144	Pre_D7_CM	1	36	12	0	FALSE	0	CFAB_HUMAN	P00751	FALSE	1_Pre_D7_CM
27	6.12349	8aug24_Sunkyung_D5-DIA_60spd_S3-C6_1_7151	Pre_D7_CM	2	36	12	0	FALSE	0	CFAB_HUMAN	P00751	FALSE	2_Pre_D7_CM
28	7.5878	8aug24_Sunkyung_E5-DIA_60spd_S3-D6_1_7158	Pre_D7_CM	3	36	12	0	FALSE	0	CFAB_HUMAN	P00751	FALSE	3_Pre_D7_CM
2	8.34515	8aug24_Sunkyung_D2-DIA_60spd_S3-C3_1_7148	Post_D0	7	132	48	0.157895	FALSE	0	CFAH_HUMAN	P08603	FALSE	7_Post_D0
3	7.17784	8aug24_Sunkyung_E2-DIA_60spd_S3-D3_1_7155	Post_D0	8	132	36	0.368421	FALSE	0	CFAH_HUMAN	P08603	FALSE	8_Post_D0
4	7.66869	8aug24_Sunkyung_F2-DIA_60spd_S3-E3_1_7162	Post_D0	9	132	48	0.157895	FALSE	0	CFAH_HUMAN	P08603	FALSE	9_Post_D0
6	7.33608	8aug24_Sunkyung_C4-DIA_60spd_S3-B5_1_7143	Post_D7_CC	6	93	45	0.210526	FALSE	0	CFAH_HUMAN	P08603	FALSE	6_Post_D7_CC
8	7.7292	8aug24_Sunkyung_E4-DIA_60spd_S3-D5_1_7157	Post_D7_CC	8	93	36	0.368421	FALSE	0	CFAH_HUMAN	P08603	FALSE	8_Post_D7_CC
9	7.15651	8aug24_Sunkyung_F4-DIA_60spd_S3-E5_1_7164	Post_D7_CC	9	93	12	0.789474	TRUE	0	CFAH_HUMAN	P08603	FALSE	9_Post_D7_CC
11	8.23098	8aug24_Sunkyung_C6-DIA_60spd_S3-B7_1_7145	Post_D7_CM	6	165	36	0.368421	FALSE	0	CFAH_HUMAN	P08603	FALSE	6_Post_D7_CM
12	6.37756	8aug24_Sunkyung_D6-DIA_60spd_S3-C7_1_7152	Post_D7_CM	7	165	33	0.421053	FALSE	0	CFAH_HUMAN	P08603	FALSE	7_Post_D7_CM
13	7.73406	8aug24_Sunkyung_E6-DIA_60spd_S3-D7_1_7159	Post_D7_CM	8	165	36	0.368421	FALSE	0	CFAH_HUMAN	P08603	FALSE	8_Post_D7_CM
14	7.56567	8aug24_Sunkyung_F6-DIA_60spd_S3-E7_1_7166	Post_D7_CM	9	165	36	0.368421	FALSE	0	CFAH_HUMAN	P08603	FALSE	9_Post_D7_CM
15	7.3309	8aug24_Sunkyung_G6-DIA_60spd_S3-F7_1_7173	Post_D7_CM	10	165	24	0.578947	TRUE	0	CFAH_HUMAN	P08603	FALSE	10_Post_D7_CM
16	7.3447	8aug24_Sunkyung_C1b-DIA_60spd_S3-B2_1_7140	Pre_D0	1	96	12	0.789474	TRUE	0	CFAH_HUMAN	P08603	FALSE	1_Pre_D0
17	7.50894	8aug24_Sunkyung_D1-DIA_60spd_S3-C2_1_7147	Pre_D0	2	96	36	0.368421	FALSE	0	CFAH_HUMAN	P08603	FALSE	2_Pre_D0
18	7.73632	8aug24_Sunkyung_E1-DIA_60spd_S3-D2_1_7154	Pre_D0	3	96	48	0.157895	FALSE	0	CFAH_HUMAN	P08603	FALSE	3_Pre_D0
21	8.40153	8aug24_Sunkyung_C3-DIA_60spd_S3-B4_1_7142	Pre_D7_CC	1	144	48	0.157895	FALSE	0	CFAH_HUMAN	P08603	FALSE	1_Pre_D7_CC
22	7.96287	8aug24_Sunkyung_D3-DIA_60spd_S3-C4_1_7149	Pre_D7_CC	2	144	48	0.157895	FALSE	0	CFAH_HUMAN	P08603	FALSE	2_Pre_D7_CC
23	7.62975	8aug24_Sunkyung_E3-DIA_60spd_S3-D4_1_7156	Pre_D7_CC	3	144	36	0.368421	FALSE	0	CFAH_HUMAN	P08603	FALSE	3_Pre_D7_CC
24	7.72737	8aug24_Sunkyung_F3-DIA_60spd_S3-E4_1_7163	Pre_D7_CC	4	144	12	0.789474	TRUE	0	CFAH_HUMAN	P08603	FALSE	4_Pre_D7_CC
26	8.76464	8aug24_Sunkyung_C5-DIA_60spd_S3-B6_1_7144	Pre_D7_CM	1	153	45	0.210526	FALSE	0	CFAH_HUMAN	P08603	FALSE	1_Pre_D7_CM
28	7.89724	8aug24_Sunkyung_E5-DIA_60spd_S3-D6_1_7158	Pre_D7_CM	3	153	48	0.157895	FALSE	0	CFAH_HUMAN	P08603	FALSE	3_Pre_D7_CM
29	7.28328	8aug24_Sunkyung_F5-DIA_60spd_S3-E6_1_7165	Pre_D7_CM	4	153	36	0.368421	FALSE	0	CFAH_HUMAN	P08603	FALSE	4_Pre_D7_CM
30	7.34017	8aug24_Sunkyung_G5-DIA_60spd_S3-F6_1_7172	Pre_D7_CM	5	153	24	0.578947	TRUE	0	CFAH_HUMAN	P08603	FALSE	5_Pre_D7_CM
2	7.32657	8aug24_Sunkyung_D2-DIA_60spd_S3-C3_1_7148	Post_D0	7	44	10	0.166667	FALSE	0	CFAI_HUMAN	P05156	FALSE	7_Post_D0
3	6.86071	8aug24_Sunkyung_E2-DIA_60spd_S3-D3_1_7155	Post_D0	8	44	10	0.166667	FALSE	0	CFAI_HUMAN	P05156	FALSE	8_Post_D0
4	7.224	8aug24_Sunkyung_F2-DIA_60spd_S3-E3_1_7162	Post_D0	9	44	12	0	FALSE	0	CFAI_HUMAN	P05156	FALSE	9_Post_D0
5	7.18579	8aug24_Sunkyung_G2-DIA_60spd_S3-F3_1_7169	Post_D0	10	44	12	0	FALSE	0	CFAI_HUMAN	P05156	FALSE	10_Post_D0
6	7.42771	8aug24_Sunkyung_C4-DIA_60spd_S3-B5_1_7143	Post_D7_CC	6	22	12	0	FALSE	0	CFAI_HUMAN	P05156	FALSE	6_Post_D7_CC
8	6.99717	8aug24_Sunkyung_E4-DIA_60spd_S3-D5_1_7157	Post_D7_CC	8	22	10	0.166667	FALSE	0	CFAI_HUMAN	P05156	FALSE	8_Post_D7_CC
11	7.5021	8aug24_Sunkyung_C6-DIA_60spd_S3-B7_1_7145	Post_D7_CM	6	20	10	0.166667	FALSE	0	CFAI_HUMAN	P05156	FALSE	6_Post_D7_CM
12	6.63056	8aug24_Sunkyung_D6-DIA_60spd_S3-C7_1_7152	Post_D7_CM	7	20	10	0.166667	FALSE	0	CFAI_HUMAN	P05156	FALSE	7_Post_D7_CM
17	7.35788	8aug24_Sunkyung_D1-DIA_60spd_S3-C2_1_7147	Pre_D0	2	30	10	0.166667	FALSE	0	CFAI_HUMAN	P05156	FALSE	2_Pre_D0
18	7.16929	8aug24_Sunkyung_E1-DIA_60spd_S3-D2_1_7154	Pre_D0	3	30	10	0.166667	FALSE	0	CFAI_HUMAN	P05156	FALSE	3_Pre_D0
19	6.67613	8aug24_Sunkyung_F1-DIA_60spd_S3-E2_1_7161	Pre_D0	4	30	10	0.166667	FALSE	0	CFAI_HUMAN	P05156	FALSE	4_Pre_D0
21	9.21937	8aug24_Sunkyung_C3-DIA_60spd_S3-B4_1_7142	Pre_D7_CC	1	20	10	0.166667	FALSE	0	CFAI_HUMAN	P05156	FALSE	1_Pre_D7_CC
23	7.66642	8aug24_Sunkyung_E3-DIA_60spd_S3-D4_1_7156	Pre_D7_CC	3	20	10	0.166667	FALSE	0	CFAI_HUMAN	P05156	FALSE	3_Pre_D7_CC
26	8.78258	8aug24_Sunkyung_C5-DIA_60spd_S3-B6_1_7144	Pre_D7_CM	1	20	10	0.166667	FALSE	0	CFAI_HUMAN	P05156	FALSE	1_Pre_D7_CM
28	4.67633	8aug24_Sunkyung_E5-DIA_60spd_S3-D6_1_7158	Pre_D7_CM	3	20	10	0.166667	FALSE	0	CFAI_HUMAN	P05156	FALSE	3_Pre_D7_CM
2	7.29468	8aug24_Sunkyung_D2-DIA_60spd_S3-C3_1_7148	Post_D0	7	44	11	0	FALSE	0	CHM4A_HUMAN	Q9BY43	FALSE	7_Post_D0
3	6.29622	8aug24_Sunkyung_E2-DIA_60spd_S3-D3_1_7155	Post_D0	8	44	11	0	FALSE	0	CHM4A_HUMAN	Q9BY43	FALSE	8_Post_D0
4	6.42872	8aug24_Sunkyung_F2-DIA_60spd_S3-E3_1_7162	Post_D0	9	44	11	0	FALSE	0	CHM4A_HUMAN	Q9BY43	FALSE	9_Post_D0
5	7.33164	8aug24_Sunkyung_G2-DIA_60spd_S3-F3_1_7169	Post_D0	10	44	11	0	FALSE	0	CHM4A_HUMAN	Q9BY43	FALSE	10_Post_D0
7	7.51543	8aug24_Sunkyung_D4-DIA_60spd_S3-C5_1_7150	Post_D7_CC	7	22	11	0	FALSE	0	CHM4A_HUMAN	Q9BY43	FALSE	7_Post_D7_CC
9	7.1503	8aug24_Sunkyung_F4-DIA_60spd_S3-E5_1_7164	Post_D7_CC	9	22	11	0	FALSE	0	CHM4A_HUMAN	Q9BY43	FALSE	9_Post_D7_CC
12	6.29622	8aug24_Sunkyung_D6-DIA_60spd_S3-C7_1_7152	Post_D7_CM	7	44	11	0	FALSE	0	CHM4A_HUMAN	Q9BY43	FALSE	7_Post_D7_CM
13	6.02514	8aug24_Sunkyung_E6-DIA_60spd_S3-D7_1_7159	Post_D7_CM	8	44	11	0	FALSE	0	CHM4A_HUMAN	Q9BY43	FALSE	8_Post_D7_CM
14	6.16766	8aug24_Sunkyung_F6-DIA_60spd_S3-E7_1_7166	Post_D7_CM	9	44	11	0	FALSE	0	CHM4A_HUMAN	Q9BY43	FALSE	9_Post_D7_CM
15	7.71243	8aug24_Sunkyung_G6-DIA_60spd_S3-F7_1_7173	Post_D7_CM	10	44	11	0	FALSE	0	CHM4A_HUMAN	Q9BY43	FALSE	10_Post_D7_CM
16	8.3682	8aug24_Sunkyung_C1b-DIA_60spd_S3-B2_1_7140	Pre_D0	1	44	11	0	FALSE	0	CHM4A_HUMAN	Q9BY43	FALSE	1_Pre_D0
17	8.2639	8aug24_Sunkyung_D1-DIA_60spd_S3-C2_1_7147	Pre_D0	2	44	11	0	FALSE	0	CHM4A_HUMAN	Q9BY43	FALSE	2_Pre_D0
19	6.10269	8aug24_Sunkyung_F1-DIA_60spd_S3-E2_1_7161	Pre_D0	4	44	11	0	FALSE	0	CHM4A_HUMAN	Q9BY43	FALSE	4_Pre_D0
20	6.54869	8aug24_Sunkyung_G1-DIA_60spd_S3-F2_1_7168	Pre_D0	5	44	11	0	FALSE	0	CHM4A_HUMAN	Q9BY43	FALSE	5_Pre_D0
22	7.53514	8aug24_Sunkyung_D3-DIA_60spd_S3-C4_1_7149	Pre_D7_CC	2	33	11	0	FALSE	0	CHM4A_HUMAN	Q9BY43	FALSE	2_Pre_D7_CC
23	7.17773	8aug24_Sunkyung_E3-DIA_60spd_S3-D4_1_7156	Pre_D7_CC	3	33	11	0	FALSE	0	CHM4A_HUMAN	Q9BY43	FALSE	3_Pre_D7_CC
25	6.36743	8aug24_Sunkyung_G3-DIA_60spd_S3-F4_1_7170	Pre_D7_CC	5	33	11	0	FALSE	0	CHM4A_HUMAN	Q9BY43	FALSE	5_Pre_D7_CC
29	6.40733	8aug24_Sunkyung_F5-DIA_60spd_S3-E6_1_7165	Pre_D7_CM	4	11	11	0	FALSE	0	CHM4A_HUMAN	Q9BY43	FALSE	4_Pre_D7_CM
1	6.51688	8aug24_Sunkyung_C2-DIA_60spd_S3-B3_1_7141	Post_D0	6	223	12	0.833333	TRUE	0	CILP1_HUMAN	O75339	FALSE	6_Post_D0
2	7.25267	8aug24_Sunkyung_D2-DIA_60spd_S3-C3_1_7148	Post_D0	7	223	60	0.166667	FALSE	0	CILP1_HUMAN	O75339	FALSE	7_Post_D0
3	7.43065	8aug24_Sunkyung_E2-DIA_60spd_S3-D3_1_7155	Post_D0	8	223	19	0.736111	TRUE	0	CILP1_HUMAN	O75339	FALSE	8_Post_D0
4	8.13282	8aug24_Sunkyung_F2-DIA_60spd_S3-E3_1_7162	Post_D0	9	223	72	0	FALSE	0	CILP1_HUMAN	O75339	FALSE	9_Post_D0
5	7.08336	8aug24_Sunkyung_G2-DIA_60spd_S3-F3_1_7169	Post_D0	10	223	60	0.166667	FALSE	0	CILP1_HUMAN	O75339	FALSE	10_Post_D0
6	5.81598	8aug24_Sunkyung_C4-DIA_60spd_S3-B5_1_7143	Post_D7_CC	6	48	15	0.791667	TRUE	0	CILP1_HUMAN	O75339	FALSE	6_Post_D7_CC
8	7.16232	8aug24_Sunkyung_E4-DIA_60spd_S3-D5_1_7157	Post_D7_CC	8	48	33	0.541667	TRUE	0	CILP1_HUMAN	O75339	FALSE	8_Post_D7_CC
11	7.58442	8aug24_Sunkyung_C6-DIA_60spd_S3-B7_1_7145	Post_D7_CM	6	199	43	0.402778	FALSE	0	CILP1_HUMAN	O75339	FALSE	6_Post_D7_CM
12	6.56616	8aug24_Sunkyung_D6-DIA_60spd_S3-C7_1_7152	Post_D7_CM	7	199	42	0.416667	FALSE	0	CILP1_HUMAN	O75339	FALSE	7_Post_D7_CM
13	7.30684	8aug24_Sunkyung_E6-DIA_60spd_S3-D7_1_7159	Post_D7_CM	8	199	54	0.25	FALSE	0	CILP1_HUMAN	O75339	FALSE	8_Post_D7_CM
14	7.18252	8aug24_Sunkyung_F6-DIA_60spd_S3-E7_1_7166	Post_D7_CM	9	199	38	0.472222	FALSE	0	CILP1_HUMAN	O75339	FALSE	9_Post_D7_CM
15	7.36723	8aug24_Sunkyung_G6-DIA_60spd_S3-F7_1_7173	Post_D7_CM	10	199	22	0.694444	TRUE	0	CILP1_HUMAN	O75339	FALSE	10_Post_D7_CM
17	7.56497	8aug24_Sunkyung_D1-DIA_60spd_S3-C2_1_7147	Pre_D0	2	85	37	0.486111	FALSE	0	CILP1_HUMAN	O75339	FALSE	2_Pre_D0
18	6.80755	8aug24_Sunkyung_E1-DIA_60spd_S3-D2_1_7154	Pre_D0	3	85	31	0.569444	TRUE	0	CILP1_HUMAN	O75339	FALSE	3_Pre_D0
20	4.3618	8aug24_Sunkyung_G1-DIA_60spd_S3-F2_1_7168	Pre_D0	5	85	17	0.763889	TRUE	0	CILP1_HUMAN	O75339	FALSE	5_Pre_D0
21	7.84027	8aug24_Sunkyung_C3-DIA_60spd_S3-B4_1_7142	Pre_D7_CC	1	106	60	0.166667	FALSE	0	CILP1_HUMAN	O75339	FALSE	1_Pre_D7_CC
22	7.57216	8aug24_Sunkyung_D3-DIA_60spd_S3-C4_1_7149	Pre_D7_CC	2	106	26	0.638889	TRUE	0	CILP1_HUMAN	O75339	FALSE	2_Pre_D7_CC
23	6.93517	8aug24_Sunkyung_E3-DIA_60spd_S3-D4_1_7156	Pre_D7_CC	3	106	20	0.722222	TRUE	0	CILP1_HUMAN	O75339	FALSE	3_Pre_D7_CC
26	8.62226	8aug24_Sunkyung_C5-DIA_60spd_S3-B6_1_7144	Pre_D7_CM	1	210	60	0.166667	FALSE	0	CILP1_HUMAN	O75339	FALSE	1_Pre_D7_CM
27	6.07607	8aug24_Sunkyung_D5-DIA_60spd_S3-C6_1_7151	Pre_D7_CM	2	210	9	0.875	TRUE	0	CILP1_HUMAN	O75339	FALSE	2_Pre_D7_CM
28	7.7726	8aug24_Sunkyung_E5-DIA_60spd_S3-D6_1_7158	Pre_D7_CM	3	210	60	0.166667	FALSE	0	CILP1_HUMAN	O75339	FALSE	3_Pre_D7_CM
29	7.86621	8aug24_Sunkyung_F5-DIA_60spd_S3-E6_1_7165	Pre_D7_CM	4	210	72	0	FALSE	0	CILP1_HUMAN	O75339	FALSE	4_Pre_D7_CM
30	5.81598	8aug24_Sunkyung_G5-DIA_60spd_S3-F6_1_7172	Pre_D7_CM	5	210	9	0.875	TRUE	0	CILP1_HUMAN	O75339	FALSE	5_Pre_D7_CM
3	7.92825	8aug24_Sunkyung_E2-DIA_60spd_S3-D3_1_7155	Post_D0	8	22	11	0.421053	FALSE	0	CISY_HUMAN	O75390	FALSE	8_Post_D0
4	7.01591	8aug24_Sunkyung_F2-DIA_60spd_S3-E3_1_7162	Post_D0	9	22	11	0.421053	FALSE	0	CISY_HUMAN	O75390	FALSE	9_Post_D0
8	9.08403	8aug24_Sunkyung_E4-DIA_60spd_S3-D5_1_7157	Post_D7_CC	8	8	8	0.578947	TRUE	0	CISY_HUMAN	O75390	FALSE	8_Post_D7_CC
12	7.22052	8aug24_Sunkyung_D6-DIA_60spd_S3-C7_1_7152	Post_D7_CM	7	41	11	0.421053	FALSE	0	CISY_HUMAN	O75390	FALSE	7_Post_D7_CM
13	6.43512	8aug24_Sunkyung_E6-DIA_60spd_S3-D7_1_7159	Post_D7_CM	8	41	11	0.421053	FALSE	0	CISY_HUMAN	O75390	FALSE	8_Post_D7_CM
14	8.20665	8aug24_Sunkyung_F6-DIA_60spd_S3-E7_1_7166	Post_D7_CM	9	41	19	0	FALSE	0	CISY_HUMAN	O75390	FALSE	9_Post_D7_CM
16	7.35725	8aug24_Sunkyung_C1b-DIA_60spd_S3-B2_1_7140	Pre_D0	1	41	11	0.421053	FALSE	0	CISY_HUMAN	O75390	FALSE	1_Pre_D0
19	7.42206	8aug24_Sunkyung_F1-DIA_60spd_S3-E2_1_7161	Pre_D0	4	41	11	0.421053	FALSE	0	CISY_HUMAN	O75390	FALSE	4_Pre_D0
20	8.1403	8aug24_Sunkyung_G1-DIA_60spd_S3-F2_1_7168	Pre_D0	5	41	19	0	FALSE	0	CISY_HUMAN	O75390	FALSE	5_Pre_D0
24	6.43512	8aug24_Sunkyung_F3-DIA_60spd_S3-E4_1_7163	Pre_D7_CC	4	11	11	0.421053	FALSE	0	CISY_HUMAN	O75390	FALSE	4_Pre_D7_CC
29	6.91932	8aug24_Sunkyung_F5-DIA_60spd_S3-E6_1_7165	Pre_D7_CM	4	22	11	0.421053	FALSE	0	CISY_HUMAN	O75390	FALSE	4_Pre_D7_CM
30	6.43512	8aug24_Sunkyung_G5-DIA_60spd_S3-F6_1_7172	Pre_D7_CM	5	22	11	0.421053	FALSE	0	CISY_HUMAN	O75390	FALSE	5_Pre_D7_CM
1	7.55822	8aug24_Sunkyung_C2-DIA_60spd_S3-B3_1_7141	Post_D0	6	36	12	0	FALSE	0	CLC11_HUMAN	Q9Y240	FALSE	6_Post_D0
3	8.23601	8aug24_Sunkyung_E2-DIA_60spd_S3-D3_1_7155	Post_D0	8	36	12	0	FALSE	0	CLC11_HUMAN	Q9Y240	FALSE	8_Post_D0
4	8.54583	8aug24_Sunkyung_F2-DIA_60spd_S3-E3_1_7162	Post_D0	9	36	12	0	FALSE	0	CLC11_HUMAN	Q9Y240	FALSE	9_Post_D0
6	7.97271	8aug24_Sunkyung_C4-DIA_60spd_S3-B5_1_7143	Post_D7_CC	6	12	12	0	FALSE	0	CLC11_HUMAN	Q9Y240	FALSE	6_Post_D7_CC
11	7.34548	8aug24_Sunkyung_C6-DIA_60spd_S3-B7_1_7145	Post_D7_CM	6	48	12	0	FALSE	0	CLC11_HUMAN	Q9Y240	FALSE	6_Post_D7_CM
12	6.82836	8aug24_Sunkyung_D6-DIA_60spd_S3-C7_1_7152	Post_D7_CM	7	48	12	0	FALSE	0	CLC11_HUMAN	Q9Y240	FALSE	7_Post_D7_CM
13	7.85687	8aug24_Sunkyung_E6-DIA_60spd_S3-D7_1_7159	Post_D7_CM	8	48	12	0	FALSE	0	CLC11_HUMAN	Q9Y240	FALSE	8_Post_D7_CM
14	8.20807	8aug24_Sunkyung_F6-DIA_60spd_S3-E7_1_7166	Post_D7_CM	9	48	12	0	FALSE	0	CLC11_HUMAN	Q9Y240	FALSE	9_Post_D7_CM
16	8.65469	8aug24_Sunkyung_C1b-DIA_60spd_S3-B2_1_7140	Pre_D0	1	48	12	0	FALSE	0	CLC11_HUMAN	Q9Y240	FALSE	1_Pre_D0
17	7.82875	8aug24_Sunkyung_D1-DIA_60spd_S3-C2_1_7147	Pre_D0	2	48	12	0	FALSE	0	CLC11_HUMAN	Q9Y240	FALSE	2_Pre_D0
18	7.46829	8aug24_Sunkyung_E1-DIA_60spd_S3-D2_1_7154	Pre_D0	3	48	12	0	FALSE	0	CLC11_HUMAN	Q9Y240	FALSE	3_Pre_D0
20	7.3484	8aug24_Sunkyung_G1-DIA_60spd_S3-F2_1_7168	Pre_D0	5	48	12	0	FALSE	0	CLC11_HUMAN	Q9Y240	FALSE	5_Pre_D0
21	8.47771	8aug24_Sunkyung_C3-DIA_60spd_S3-B4_1_7142	Pre_D7_CC	1	12	12	0	FALSE	0	CLC11_HUMAN	Q9Y240	FALSE	1_Pre_D7_CC
26	8.28295	8aug24_Sunkyung_C5-DIA_60spd_S3-B6_1_7144	Pre_D7_CM	1	48	12	0	FALSE	0	CLC11_HUMAN	Q9Y240	FALSE	1_Pre_D7_CM
28	7.65836	8aug24_Sunkyung_E5-DIA_60spd_S3-D6_1_7158	Pre_D7_CM	3	48	12	0	FALSE	0	CLC11_HUMAN	Q9Y240	FALSE	3_Pre_D7_CM
29	8.47172	8aug24_Sunkyung_F5-DIA_60spd_S3-E6_1_7165	Pre_D7_CM	4	48	12	0	FALSE	0	CLC11_HUMAN	Q9Y240	FALSE	4_Pre_D7_CM
30	8.26126	8aug24_Sunkyung_G5-DIA_60spd_S3-F6_1_7172	Pre_D7_CM	5	48	12	0	FALSE	0	CLC11_HUMAN	Q9Y240	FALSE	5_Pre_D7_CM
1	5.199	8aug24_Sunkyung_C2-DIA_60spd_S3-B3_1_7141	Post_D0	6	456	20	0.913793	TRUE	0	CLH1_HUMAN	Q00610	FALSE	6_Post_D0
2	6.84459	8aug24_Sunkyung_D2-DIA_60spd_S3-C3_1_7148	Post_D0	7	456	131	0.435345	FALSE	0	CLH1_HUMAN	Q00610	FALSE	7_Post_D0
3	7.22518	8aug24_Sunkyung_E2-DIA_60spd_S3-D3_1_7155	Post_D0	8	456	173	0.25431	FALSE	0	CLH1_HUMAN	Q00610	FALSE	8_Post_D0
4	6.86815	8aug24_Sunkyung_F2-DIA_60spd_S3-E3_1_7162	Post_D0	9	456	124	0.465517	FALSE	0	CLH1_HUMAN	Q00610	FALSE	9_Post_D0
5	5.81098	8aug24_Sunkyung_G2-DIA_60spd_S3-F3_1_7169	Post_D0	10	456	8	0.965517	TRUE	0	CLH1_HUMAN	Q00610	FALSE	10_Post_D0
6	6.74502	8aug24_Sunkyung_C4-DIA_60spd_S3-B5_1_7143	Post_D7_CC	6	506	112	0.517241	TRUE	0	CLH1_HUMAN	Q00610	FALSE	6_Post_D7_CC
7	6.70844	8aug24_Sunkyung_D4-DIA_60spd_S3-C5_1_7150	Post_D7_CC	7	506	63	0.728448	TRUE	0	CLH1_HUMAN	Q00610	FALSE	7_Post_D7_CC
8	6.63273	8aug24_Sunkyung_E4-DIA_60spd_S3-D5_1_7157	Post_D7_CC	8	506	84	0.637931	TRUE	0	CLH1_HUMAN	Q00610	FALSE	8_Post_D7_CC
9	6.93615	8aug24_Sunkyung_F4-DIA_60spd_S3-E5_1_7164	Post_D7_CC	9	506	112	0.517241	TRUE	0	CLH1_HUMAN	Q00610	FALSE	9_Post_D7_CC
10	7.24747	8aug24_Sunkyung_G4-DIA_60spd_S3-F5_1_7171	Post_D7_CC	10	506	135	0.418103	FALSE	0	CLH1_HUMAN	Q00610	FALSE	10_Post_D7_CC
11	6.0305	8aug24_Sunkyung_C6-DIA_60spd_S3-B7_1_7145	Post_D7_CM	6	715	31	0.866379	TRUE	0	CLH1_HUMAN	Q00610	FALSE	6_Post_D7_CM
12	6.95475	8aug24_Sunkyung_D6-DIA_60spd_S3-C7_1_7152	Post_D7_CM	7	715	212	0.0862069	FALSE	0	CLH1_HUMAN	Q00610	FALSE	7_Post_D7_CM
13	6.86774	8aug24_Sunkyung_E6-DIA_60spd_S3-D7_1_7159	Post_D7_CM	8	715	162	0.301724	FALSE	0	CLH1_HUMAN	Q00610	FALSE	8_Post_D7_CM
14	7.50253	8aug24_Sunkyung_F6-DIA_60spd_S3-E7_1_7166	Post_D7_CM	9	715	210	0.0948276	FALSE	0	CLH1_HUMAN	Q00610	FALSE	9_Post_D7_CM
15	6.94893	8aug24_Sunkyung_G6-DIA_60spd_S3-F7_1_7173	Post_D7_CM	10	715	100	0.568966	TRUE	0	CLH1_HUMAN	Q00610	FALSE	10_Post_D7_CM
16	6.53784	8aug24_Sunkyung_C1b-DIA_60spd_S3-B2_1_7140	Pre_D0	1	601	116	0.5	TRUE	0	CLH1_HUMAN	Q00610	FALSE	1_Pre_D0
17	6.55909	8aug24_Sunkyung_D1-DIA_60spd_S3-C2_1_7147	Pre_D0	2	601	135	0.418103	FALSE	0	CLH1_HUMAN	Q00610	FALSE	2_Pre_D0
18	7.03269	8aug24_Sunkyung_E1-DIA_60spd_S3-D2_1_7154	Pre_D0	3	601	131	0.435345	FALSE	0	CLH1_HUMAN	Q00610	FALSE	3_Pre_D0
19	6.43098	8aug24_Sunkyung_F1-DIA_60spd_S3-E2_1_7161	Pre_D0	4	601	32	0.862069	TRUE	0	CLH1_HUMAN	Q00610	FALSE	4_Pre_D0
20	7.39253	8aug24_Sunkyung_G1-DIA_60spd_S3-F2_1_7168	Pre_D0	5	601	187	0.193966	FALSE	0	CLH1_HUMAN	Q00610	FALSE	5_Pre_D0
21	6.23613	8aug24_Sunkyung_C3-DIA_60spd_S3-B4_1_7142	Pre_D7_CC	1	388	70	0.698276	TRUE	0	CLH1_HUMAN	Q00610	FALSE	1_Pre_D7_CC
22	6.85409	8aug24_Sunkyung_D3-DIA_60spd_S3-C4_1_7149	Pre_D7_CC	2	388	63	0.728448	TRUE	0	CLH1_HUMAN	Q00610	FALSE	2_Pre_D7_CC
23	6.44893	8aug24_Sunkyung_E3-DIA_60spd_S3-D4_1_7156	Pre_D7_CC	3	388	32	0.862069	TRUE	0	CLH1_HUMAN	Q00610	FALSE	3_Pre_D7_CC
24	7.40138	8aug24_Sunkyung_F3-DIA_60spd_S3-E4_1_7163	Pre_D7_CC	4	388	149	0.357759	FALSE	0	CLH1_HUMAN	Q00610	FALSE	4_Pre_D7_CC
25	7.0432	8aug24_Sunkyung_G3-DIA_60spd_S3-F4_1_7170	Pre_D7_CC	5	388	74	0.681034	TRUE	0	CLH1_HUMAN	Q00610	FALSE	5_Pre_D7_CC
26	6.24743	8aug24_Sunkyung_C5-DIA_60spd_S3-B6_1_7144	Pre_D7_CM	1	642	109	0.530172	TRUE	0	CLH1_HUMAN	Q00610	FALSE	1_Pre_D7_CM
27	6.37355	8aug24_Sunkyung_D5-DIA_60spd_S3-C6_1_7151	Pre_D7_CM	2	642	47	0.797414	TRUE	0	CLH1_HUMAN	Q00610	FALSE	2_Pre_D7_CM
28	6.84459	8aug24_Sunkyung_E5-DIA_60spd_S3-D6_1_7158	Pre_D7_CM	3	642	98	0.577586	TRUE	0	CLH1_HUMAN	Q00610	FALSE	3_Pre_D7_CM
29	7.11462	8aug24_Sunkyung_F5-DIA_60spd_S3-E6_1_7165	Pre_D7_CM	4	642	212	0.0862069	FALSE	0	CLH1_HUMAN	Q00610	FALSE	4_Pre_D7_CM
30	7.43618	8aug24_Sunkyung_G5-DIA_60spd_S3-F6_1_7172	Pre_D7_CM	5	642	176	0.241379	FALSE	0	CLH1_HUMAN	Q00610	FALSE	5_Pre_D7_CM
1	6.26854	8aug24_Sunkyung_C2-DIA_60spd_S3-B3_1_7141	Post_D0	6	155	8	0.893333	TRUE	0	CLIC1_HUMAN	O00299	FALSE	6_Post_D0
2	7.38522	8aug24_Sunkyung_D2-DIA_60spd_S3-C3_1_7148	Post_D0	7	155	34	0.546667	TRUE	0	CLIC1_HUMAN	O00299	FALSE	7_Post_D0
3	7.58142	8aug24_Sunkyung_E2-DIA_60spd_S3-D3_1_7155	Post_D0	8	155	75	0	FALSE	0	CLIC1_HUMAN	O00299	FALSE	8_Post_D0
4	7.17957	8aug24_Sunkyung_F2-DIA_60spd_S3-E3_1_7162	Post_D0	9	155	30	0.6	TRUE	0	CLIC1_HUMAN	O00299	FALSE	9_Post_D0
5	6.15243	8aug24_Sunkyung_G2-DIA_60spd_S3-F3_1_7169	Post_D0	10	155	8	0.893333	TRUE	0	CLIC1_HUMAN	O00299	FALSE	10_Post_D0
7	6.5014	8aug24_Sunkyung_D4-DIA_60spd_S3-C5_1_7150	Post_D7_CC	7	64	8	0.893333	TRUE	0	CLIC1_HUMAN	O00299	FALSE	7_Post_D7_CC
8	6.41827	8aug24_Sunkyung_E4-DIA_60spd_S3-D5_1_7157	Post_D7_CC	8	64	8	0.893333	TRUE	0	CLIC1_HUMAN	O00299	FALSE	8_Post_D7_CC
9	7.5868	8aug24_Sunkyung_F4-DIA_60spd_S3-E5_1_7164	Post_D7_CC	9	64	30	0.6	TRUE	0	CLIC1_HUMAN	O00299	FALSE	9_Post_D7_CC
10	7.08883	8aug24_Sunkyung_G4-DIA_60spd_S3-F5_1_7171	Post_D7_CC	10	64	18	0.76	TRUE	0	CLIC1_HUMAN	O00299	FALSE	10_Post_D7_CC
12	7.63574	8aug24_Sunkyung_D6-DIA_60spd_S3-C7_1_7152	Post_D7_CM	7	189	75	0	FALSE	0	CLIC1_HUMAN	O00299	FALSE	7_Post_D7_CM
13	7.48042	8aug24_Sunkyung_E6-DIA_60spd_S3-D7_1_7159	Post_D7_CM	8	189	30	0.6	TRUE	0	CLIC1_HUMAN	O00299	FALSE	8_Post_D7_CM
14	8.00296	8aug24_Sunkyung_F6-DIA_60spd_S3-E7_1_7166	Post_D7_CM	9	189	66	0.12	FALSE	0	CLIC1_HUMAN	O00299	FALSE	9_Post_D7_CM
15	7.38928	8aug24_Sunkyung_G6-DIA_60spd_S3-F7_1_7173	Post_D7_CM	10	189	18	0.76	TRUE	0	CLIC1_HUMAN	O00299	FALSE	10_Post_D7_CM
16	7.62212	8aug24_Sunkyung_C1b-DIA_60spd_S3-B2_1_7140	Pre_D0	1	165	42	0.44	FALSE	0	CLIC1_HUMAN	O00299	FALSE	1_Pre_D0
17	6.53325	8aug24_Sunkyung_D1-DIA_60spd_S3-C2_1_7147	Pre_D0	2	165	10	0.866667	TRUE	0	CLIC1_HUMAN	O00299	FALSE	2_Pre_D0
18	7.58493	8aug24_Sunkyung_E1-DIA_60spd_S3-D2_1_7154	Pre_D0	3	165	30	0.6	TRUE	0	CLIC1_HUMAN	O00299	FALSE	3_Pre_D0
19	6.71972	8aug24_Sunkyung_F1-DIA_60spd_S3-E2_1_7161	Pre_D0	4	165	8	0.893333	TRUE	0	CLIC1_HUMAN	O00299	FALSE	4_Pre_D0
20	8.49896	8aug24_Sunkyung_G1-DIA_60spd_S3-F2_1_7168	Pre_D0	5	165	75	0	FALSE	0	CLIC1_HUMAN	O00299	FALSE	5_Pre_D0
21	6.28609	8aug24_Sunkyung_C3-DIA_60spd_S3-B4_1_7142	Pre_D7_CC	1	76	8	0.893333	TRUE	0	CLIC1_HUMAN	O00299	FALSE	1_Pre_D7_CC
22	6.34436	8aug24_Sunkyung_D3-DIA_60spd_S3-C4_1_7149	Pre_D7_CC	2	76	18	0.76	TRUE	0	CLIC1_HUMAN	O00299	FALSE	2_Pre_D7_CC
23	5.98749	8aug24_Sunkyung_E3-DIA_60spd_S3-D4_1_7156	Pre_D7_CC	3	76	10	0.866667	TRUE	0	CLIC1_HUMAN	O00299	FALSE	3_Pre_D7_CC
24	7.57069	8aug24_Sunkyung_F3-DIA_60spd_S3-E4_1_7163	Pre_D7_CC	4	76	30	0.6	TRUE	0	CLIC1_HUMAN	O00299	FALSE	4_Pre_D7_CC
25	7.21425	8aug24_Sunkyung_G3-DIA_60spd_S3-F4_1_7170	Pre_D7_CC	5	76	10	0.866667	TRUE	0	CLIC1_HUMAN	O00299	FALSE	5_Pre_D7_CC
27	7.95771	8aug24_Sunkyung_D5-DIA_60spd_S3-C6_1_7151	Pre_D7_CM	2	101	9	0.88	TRUE	0	CLIC1_HUMAN	O00299	FALSE	2_Pre_D7_CM
28	6.52206	8aug24_Sunkyung_E5-DIA_60spd_S3-D6_1_7158	Pre_D7_CM	3	101	8	0.893333	TRUE	0	CLIC1_HUMAN	O00299	FALSE	3_Pre_D7_CM
29	7.90127	8aug24_Sunkyung_F5-DIA_60spd_S3-E6_1_7165	Pre_D7_CM	4	101	66	0.12	FALSE	0	CLIC1_HUMAN	O00299	FALSE	4_Pre_D7_CM
30	7.76433	8aug24_Sunkyung_G5-DIA_60spd_S3-F6_1_7172	Pre_D7_CM	5	101	18	0.76	TRUE	0	CLIC1_HUMAN	O00299	FALSE	5_Pre_D7_CM
1	7.48646	8aug24_Sunkyung_C2-DIA_60spd_S3-B3_1_7141	Post_D0	6	192	35	0.351852	FALSE	0	CLUS_HUMAN	P10909	FALSE	6_Post_D0
2	7.26653	8aug24_Sunkyung_D2-DIA_60spd_S3-C3_1_7148	Post_D0	7	192	24	0.555556	TRUE	0	CLUS_HUMAN	P10909	FALSE	7_Post_D0
3	7.49256	8aug24_Sunkyung_E2-DIA_60spd_S3-D3_1_7155	Post_D0	8	192	45	0.166667	FALSE	0	CLUS_HUMAN	P10909	FALSE	8_Post_D0
4	8.41367	8aug24_Sunkyung_F2-DIA_60spd_S3-E3_1_7162	Post_D0	9	192	54	0	FALSE	0	CLUS_HUMAN	P10909	FALSE	9_Post_D0
5	7.57447	8aug24_Sunkyung_G2-DIA_60spd_S3-F3_1_7169	Post_D0	10	192	34	0.37037	FALSE	0	CLUS_HUMAN	P10909	FALSE	10_Post_D0
6	7.30661	8aug24_Sunkyung_C4-DIA_60spd_S3-B5_1_7143	Post_D7_CC	6	60	24	0.555556	TRUE	0	CLUS_HUMAN	P10909	FALSE	6_Post_D7_CC
8	6.07659	8aug24_Sunkyung_E4-DIA_60spd_S3-D5_1_7157	Post_D7_CC	8	60	24	0.555556	TRUE	0	CLUS_HUMAN	P10909	FALSE	8_Post_D7_CC
9	6.05416	8aug24_Sunkyung_F4-DIA_60spd_S3-E5_1_7164	Post_D7_CC	9	60	12	0.777778	TRUE	0	CLUS_HUMAN	P10909	FALSE	9_Post_D7_CC
11	7.4422	8aug24_Sunkyung_C6-DIA_60spd_S3-B7_1_7145	Post_D7_CM	6	138	24	0.555556	TRUE	0	CLUS_HUMAN	P10909	FALSE	6_Post_D7_CM
12	6.01564	8aug24_Sunkyung_D6-DIA_60spd_S3-C7_1_7152	Post_D7_CM	7	138	34	0.37037	FALSE	0	CLUS_HUMAN	P10909	FALSE	7_Post_D7_CM
13	7.82552	8aug24_Sunkyung_E6-DIA_60spd_S3-D7_1_7159	Post_D7_CM	8	138	12	0.777778	TRUE	0	CLUS_HUMAN	P10909	FALSE	8_Post_D7_CM
14	7.2482	8aug24_Sunkyung_F6-DIA_60spd_S3-E7_1_7166	Post_D7_CM	9	138	34	0.37037	FALSE	0	CLUS_HUMAN	P10909	FALSE	9_Post_D7_CM
15	7.19732	8aug24_Sunkyung_G6-DIA_60spd_S3-F7_1_7173	Post_D7_CM	10	138	34	0.37037	FALSE	0	CLUS_HUMAN	P10909	FALSE	10_Post_D7_CM
16	8.23419	8aug24_Sunkyung_C1b-DIA_60spd_S3-B2_1_7140	Pre_D0	1	156	35	0.351852	FALSE	0	CLUS_HUMAN	P10909	FALSE	1_Pre_D0
17	7.92647	8aug24_Sunkyung_D1-DIA_60spd_S3-C2_1_7147	Pre_D0	2	156	34	0.37037	FALSE	0	CLUS_HUMAN	P10909	FALSE	2_Pre_D0
18	8.07499	8aug24_Sunkyung_E1-DIA_60spd_S3-D2_1_7154	Pre_D0	3	156	43	0.203704	FALSE	0	CLUS_HUMAN	P10909	FALSE	3_Pre_D0
19	6.75353	8aug24_Sunkyung_F1-DIA_60spd_S3-E2_1_7161	Pre_D0	4	156	22	0.592593	TRUE	0	CLUS_HUMAN	P10909	FALSE	4_Pre_D0
20	7.3078	8aug24_Sunkyung_G1-DIA_60spd_S3-F2_1_7168	Pre_D0	5	156	22	0.592593	TRUE	0	CLUS_HUMAN	P10909	FALSE	5_Pre_D0
21	8.02195	8aug24_Sunkyung_C3-DIA_60spd_S3-B4_1_7142	Pre_D7_CC	1	102	35	0.351852	FALSE	0	CLUS_HUMAN	P10909	FALSE	1_Pre_D7_CC
22	7.22558	8aug24_Sunkyung_D3-DIA_60spd_S3-C4_1_7149	Pre_D7_CC	2	102	34	0.37037	FALSE	0	CLUS_HUMAN	P10909	FALSE	2_Pre_D7_CC
23	6.79766	8aug24_Sunkyung_E3-DIA_60spd_S3-D4_1_7156	Pre_D7_CC	3	102	21	0.611111	TRUE	0	CLUS_HUMAN	P10909	FALSE	3_Pre_D7_CC
24	6.82251	8aug24_Sunkyung_F3-DIA_60spd_S3-E4_1_7163	Pre_D7_CC	4	102	12	0.777778	TRUE	0	CLUS_HUMAN	P10909	FALSE	4_Pre_D7_CC
26	7.93548	8aug24_Sunkyung_C5-DIA_60spd_S3-B6_1_7144	Pre_D7_CM	1	156	43	0.203704	FALSE	0	CLUS_HUMAN	P10909	FALSE	1_Pre_D7_CM
28	8.02744	8aug24_Sunkyung_E5-DIA_60spd_S3-D6_1_7158	Pre_D7_CM	3	156	34	0.37037	FALSE	0	CLUS_HUMAN	P10909	FALSE	3_Pre_D7_CM
29	7.70281	8aug24_Sunkyung_F5-DIA_60spd_S3-E6_1_7165	Pre_D7_CM	4	156	45	0.166667	FALSE	0	CLUS_HUMAN	P10909	FALSE	4_Pre_D7_CM
30	7.2631	8aug24_Sunkyung_G5-DIA_60spd_S3-F6_1_7172	Pre_D7_CM	5	156	34	0.37037	FALSE	0	CLUS_HUMAN	P10909	FALSE	5_Pre_D7_CM
1	4.65035	8aug24_Sunkyung_C2-DIA_60spd_S3-B3_1_7141	Post_D0	6	128	12	0.764706	TRUE	0	CNN3_HUMAN	Q15417	FALSE	6_Post_D0
2	6.51804	8aug24_Sunkyung_D2-DIA_60spd_S3-C3_1_7148	Post_D0	7	128	12	0.764706	TRUE	0	CNN3_HUMAN	Q15417	FALSE	7_Post_D0
3	7.82187	8aug24_Sunkyung_E2-DIA_60spd_S3-D3_1_7155	Post_D0	8	128	41	0.196078	FALSE	0	CNN3_HUMAN	Q15417	FALSE	8_Post_D0
4	7.27505	8aug24_Sunkyung_F2-DIA_60spd_S3-E3_1_7162	Post_D0	9	128	51	0	FALSE	0	CNN3_HUMAN	Q15417	FALSE	9_Post_D0
5	6.16406	8aug24_Sunkyung_G2-DIA_60spd_S3-F3_1_7169	Post_D0	10	128	12	0.764706	TRUE	0	CNN3_HUMAN	Q15417	FALSE	10_Post_D0
6	6.27923	8aug24_Sunkyung_C4-DIA_60spd_S3-B5_1_7143	Post_D7_CC	6	100	12	0.764706	TRUE	0	CNN3_HUMAN	Q15417	FALSE	6_Post_D7_CC
7	6.86824	8aug24_Sunkyung_D4-DIA_60spd_S3-C5_1_7150	Post_D7_CC	7	100	18	0.647059	TRUE	0	CNN3_HUMAN	Q15417	FALSE	7_Post_D7_CC
9	7.35373	8aug24_Sunkyung_F4-DIA_60spd_S3-E5_1_7164	Post_D7_CC	9	100	41	0.196078	FALSE	0	CNN3_HUMAN	Q15417	FALSE	9_Post_D7_CC
10	6.43752	8aug24_Sunkyung_G4-DIA_60spd_S3-F5_1_7171	Post_D7_CC	10	100	29	0.431373	FALSE	0	CNN3_HUMAN	Q15417	FALSE	10_Post_D7_CC
12	6.58247	8aug24_Sunkyung_D6-DIA_60spd_S3-C7_1_7152	Post_D7_CM	7	105	24	0.529412	TRUE	0	CNN3_HUMAN	Q15417	FALSE	7_Post_D7_CM
13	6.99567	8aug24_Sunkyung_E6-DIA_60spd_S3-D7_1_7159	Post_D7_CM	8	105	24	0.529412	TRUE	0	CNN3_HUMAN	Q15417	FALSE	8_Post_D7_CM
14	7.24705	8aug24_Sunkyung_F6-DIA_60spd_S3-E7_1_7166	Post_D7_CM	9	105	45	0.117647	FALSE	0	CNN3_HUMAN	Q15417	FALSE	9_Post_D7_CM
15	6.21999	8aug24_Sunkyung_G6-DIA_60spd_S3-F7_1_7173	Post_D7_CM	10	105	12	0.764706	TRUE	0	CNN3_HUMAN	Q15417	FALSE	10_Post_D7_CM
16	6.63806	8aug24_Sunkyung_C1b-DIA_60spd_S3-B2_1_7140	Pre_D0	1	148	24	0.529412	TRUE	0	CNN3_HUMAN	Q15417	FALSE	1_Pre_D0
17	6.9734	8aug24_Sunkyung_D1-DIA_60spd_S3-C2_1_7147	Pre_D0	2	148	12	0.764706	TRUE	0	CNN3_HUMAN	Q15417	FALSE	2_Pre_D0
18	6.93076	8aug24_Sunkyung_E1-DIA_60spd_S3-D2_1_7154	Pre_D0	3	148	39	0.235294	FALSE	0	CNN3_HUMAN	Q15417	FALSE	3_Pre_D0
19	6.61311	8aug24_Sunkyung_F1-DIA_60spd_S3-E2_1_7161	Pre_D0	4	148	22	0.568627	TRUE	0	CNN3_HUMAN	Q15417	FALSE	4_Pre_D0
20	8.70799	8aug24_Sunkyung_G1-DIA_60spd_S3-F2_1_7168	Pre_D0	5	148	51	0	FALSE	0	CNN3_HUMAN	Q15417	FALSE	5_Pre_D0
21	5.73349	8aug24_Sunkyung_C3-DIA_60spd_S3-B4_1_7142	Pre_D7_CC	1	107	22	0.568627	TRUE	0	CNN3_HUMAN	Q15417	FALSE	1_Pre_D7_CC
22	6.76043	8aug24_Sunkyung_D3-DIA_60spd_S3-C4_1_7149	Pre_D7_CC	2	107	12	0.764706	TRUE	0	CNN3_HUMAN	Q15417	FALSE	2_Pre_D7_CC
23	6.76216	8aug24_Sunkyung_E3-DIA_60spd_S3-D4_1_7156	Pre_D7_CC	3	107	10	0.803922	TRUE	0	CNN3_HUMAN	Q15417	FALSE	3_Pre_D7_CC
24	6.84705	8aug24_Sunkyung_F3-DIA_60spd_S3-E4_1_7163	Pre_D7_CC	4	107	51	0	FALSE	0	CNN3_HUMAN	Q15417	FALSE	4_Pre_D7_CC
25	6.28209	8aug24_Sunkyung_G3-DIA_60spd_S3-F4_1_7170	Pre_D7_CC	5	107	12	0.764706	TRUE	0	CNN3_HUMAN	Q15417	FALSE	5_Pre_D7_CC
26	6.43752	8aug24_Sunkyung_C5-DIA_60spd_S3-B6_1_7144	Pre_D7_CM	1	159	30	0.411765	FALSE	0	CNN3_HUMAN	Q15417	FALSE	1_Pre_D7_CM
27	6.60336	8aug24_Sunkyung_D5-DIA_60spd_S3-C6_1_7151	Pre_D7_CM	2	159	24	0.529412	TRUE	0	CNN3_HUMAN	Q15417	FALSE	2_Pre_D7_CM
28	6.82271	8aug24_Sunkyung_E5-DIA_60spd_S3-D6_1_7158	Pre_D7_CM	3	159	24	0.529412	TRUE	0	CNN3_HUMAN	Q15417	FALSE	3_Pre_D7_CM
29	7.07956	8aug24_Sunkyung_F5-DIA_60spd_S3-E6_1_7165	Pre_D7_CM	4	159	40	0.215686	FALSE	0	CNN3_HUMAN	Q15417	FALSE	4_Pre_D7_CM
30	7.21428	8aug24_Sunkyung_G5-DIA_60spd_S3-F6_1_7172	Pre_D7_CM	5	159	41	0.196078	FALSE	0	CNN3_HUMAN	Q15417	FALSE	5_Pre_D7_CM
1	7.30059	8aug24_Sunkyung_C2-DIA_60spd_S3-B3_1_7141	Post_D0	6	1278	186	0.401929	FALSE	0	CO1A1_HUMAN	P02452	FALSE	6_Post_D0
2	8.23559	8aug24_Sunkyung_D2-DIA_60spd_S3-C3_1_7148	Post_D0	7	1278	275	0.115756	FALSE	0	CO1A1_HUMAN	P02452	FALSE	7_Post_D0
3	8.75558	8aug24_Sunkyung_E2-DIA_60spd_S3-D3_1_7155	Post_D0	8	1278	284	0.0868167	FALSE	0	CO1A1_HUMAN	P02452	FALSE	8_Post_D0
4	10.2006	8aug24_Sunkyung_F2-DIA_60spd_S3-E3_1_7162	Post_D0	9	1278	300	0.0353698	FALSE	0	CO1A1_HUMAN	P02452	FALSE	9_Post_D0
5	7.75743	8aug24_Sunkyung_G2-DIA_60spd_S3-F3_1_7169	Post_D0	10	1278	233	0.250804	FALSE	0	CO1A1_HUMAN	P02452	FALSE	10_Post_D0
6	8.78064	8aug24_Sunkyung_C4-DIA_60spd_S3-B5_1_7143	Post_D7_CC	6	856	295	0.0514469	FALSE	0	CO1A1_HUMAN	P02452	FALSE	6_Post_D7_CC
7	7.42399	8aug24_Sunkyung_D4-DIA_60spd_S3-C5_1_7150	Post_D7_CC	7	856	163	0.475884	FALSE	0	CO1A1_HUMAN	P02452	FALSE	7_Post_D7_CC
8	7.95284	8aug24_Sunkyung_E4-DIA_60spd_S3-D5_1_7157	Post_D7_CC	8	856	256	0.176849	FALSE	0	CO1A1_HUMAN	P02452	FALSE	8_Post_D7_CC
9	6.30739	8aug24_Sunkyung_F4-DIA_60spd_S3-E5_1_7164	Post_D7_CC	9	856	118	0.620579	TRUE	0	CO1A1_HUMAN	P02452	FALSE	9_Post_D7_CC
10	5.43502	8aug24_Sunkyung_G4-DIA_60spd_S3-F5_1_7171	Post_D7_CC	10	856	24	0.92283	TRUE	0	CO1A1_HUMAN	P02452	FALSE	10_Post_D7_CC
11	8.49474	8aug24_Sunkyung_C6-DIA_60spd_S3-B7_1_7145	Post_D7_CM	6	945	209	0.327974	FALSE	0	CO1A1_HUMAN	P02452	FALSE	6_Post_D7_CM
12	7.17792	8aug24_Sunkyung_D6-DIA_60spd_S3-C7_1_7152	Post_D7_CM	7	945	220	0.292605	FALSE	0	CO1A1_HUMAN	P02452	FALSE	7_Post_D7_CM
13	7.97322	8aug24_Sunkyung_E6-DIA_60spd_S3-D7_1_7159	Post_D7_CM	8	945	208	0.33119	FALSE	0	CO1A1_HUMAN	P02452	FALSE	8_Post_D7_CM
14	7.4715	8aug24_Sunkyung_F6-DIA_60spd_S3-E7_1_7166	Post_D7_CM	9	945	181	0.418006	FALSE	0	CO1A1_HUMAN	P02452	FALSE	9_Post_D7_CM
15	6.66706	8aug24_Sunkyung_G6-DIA_60spd_S3-F7_1_7173	Post_D7_CM	10	945	127	0.59164	TRUE	0	CO1A1_HUMAN	P02452	FALSE	10_Post_D7_CM
16	8.43068	8aug24_Sunkyung_C1b-DIA_60spd_S3-B2_1_7140	Pre_D0	1	1069	229	0.263666	FALSE	0	CO1A1_HUMAN	P02452	FALSE	1_Pre_D0
17	8.84761	8aug24_Sunkyung_D1-DIA_60spd_S3-C2_1_7147	Pre_D0	2	1069	270	0.131833	FALSE	0	CO1A1_HUMAN	P02452	FALSE	2_Pre_D0
18	8.21237	8aug24_Sunkyung_E1-DIA_60spd_S3-D2_1_7154	Pre_D0	3	1069	255	0.180064	FALSE	0	CO1A1_HUMAN	P02452	FALSE	3_Pre_D0
19	8.09515	8aug24_Sunkyung_F1-DIA_60spd_S3-E2_1_7161	Pre_D0	4	1069	219	0.29582	FALSE	0	CO1A1_HUMAN	P02452	FALSE	4_Pre_D0
20	5.52329	8aug24_Sunkyung_G1-DIA_60spd_S3-F2_1_7168	Pre_D0	5	1069	96	0.691318	TRUE	0	CO1A1_HUMAN	P02452	FALSE	5_Pre_D0
21	9.25562	8aug24_Sunkyung_C3-DIA_60spd_S3-B4_1_7142	Pre_D7_CC	1	830	263	0.154341	FALSE	0	CO1A1_HUMAN	P02452	FALSE	1_Pre_D7_CC
22	8.5752	8aug24_Sunkyung_D3-DIA_60spd_S3-C4_1_7149	Pre_D7_CC	2	830	209	0.327974	FALSE	0	CO1A1_HUMAN	P02452	FALSE	2_Pre_D7_CC
23	7.70305	8aug24_Sunkyung_E3-DIA_60spd_S3-D4_1_7156	Pre_D7_CC	3	830	202	0.350482	FALSE	0	CO1A1_HUMAN	P02452	FALSE	3_Pre_D7_CC
24	6.60679	8aug24_Sunkyung_F3-DIA_60spd_S3-E4_1_7163	Pre_D7_CC	4	830	120	0.614148	TRUE	0	CO1A1_HUMAN	P02452	FALSE	4_Pre_D7_CC
25	5.29607	8aug24_Sunkyung_G3-DIA_60spd_S3-F4_1_7170	Pre_D7_CC	5	830	36	0.884244	TRUE	0	CO1A1_HUMAN	P02452	FALSE	5_Pre_D7_CC
26	9.19873	8aug24_Sunkyung_C5-DIA_60spd_S3-B6_1_7144	Pre_D7_CM	1	1011	286	0.0803859	FALSE	0	CO1A1_HUMAN	P02452	FALSE	1_Pre_D7_CM
27	6.69249	8aug24_Sunkyung_D5-DIA_60spd_S3-C6_1_7151	Pre_D7_CM	2	1011	156	0.498392	FALSE	0	CO1A1_HUMAN	P02452	FALSE	2_Pre_D7_CM
28	8.99257	8aug24_Sunkyung_E5-DIA_60spd_S3-D6_1_7158	Pre_D7_CM	3	1011	264	0.151125	FALSE	0	CO1A1_HUMAN	P02452	FALSE	3_Pre_D7_CM
29	7.94791	8aug24_Sunkyung_F5-DIA_60spd_S3-E6_1_7165	Pre_D7_CM	4	1011	175	0.437299	FALSE	0	CO1A1_HUMAN	P02452	FALSE	4_Pre_D7_CM
30	6.74006	8aug24_Sunkyung_G5-DIA_60spd_S3-F6_1_7172	Pre_D7_CM	5	1011	130	0.581994	TRUE	0	CO1A1_HUMAN	P02452	FALSE	5_Pre_D7_CM
1	7.40126	8aug24_Sunkyung_C2-DIA_60spd_S3-B3_1_7141	Post_D0	6	1703	261	0.417411	FALSE	0	CO1A2_HUMAN	P08123	FALSE	6_Post_D0
2	7.96608	8aug24_Sunkyung_D2-DIA_60spd_S3-C3_1_7148	Post_D0	7	1703	316	0.294643	FALSE	0	CO1A2_HUMAN	P08123	FALSE	7_Post_D0
3	8.91645	8aug24_Sunkyung_E2-DIA_60spd_S3-D3_1_7155	Post_D0	8	1703	392	0.125	FALSE	0	CO1A2_HUMAN	P08123	FALSE	8_Post_D0
4	10.4122	8aug24_Sunkyung_F2-DIA_60spd_S3-E3_1_7162	Post_D0	9	1703	448	0	FALSE	0	CO1A2_HUMAN	P08123	FALSE	9_Post_D0
5	7.59914	8aug24_Sunkyung_G2-DIA_60spd_S3-F3_1_7169	Post_D0	10	1703	286	0.361607	FALSE	0	CO1A2_HUMAN	P08123	FALSE	10_Post_D0
6	8.68771	8aug24_Sunkyung_C4-DIA_60spd_S3-B5_1_7143	Post_D7_CC	6	1132	369	0.176339	FALSE	0	CO1A2_HUMAN	P08123	FALSE	6_Post_D7_CC
7	7.48241	8aug24_Sunkyung_D4-DIA_60spd_S3-C5_1_7150	Post_D7_CC	7	1132	240	0.464286	FALSE	0	CO1A2_HUMAN	P08123	FALSE	7_Post_D7_CC
8	7.7903	8aug24_Sunkyung_E4-DIA_60spd_S3-D5_1_7157	Post_D7_CC	8	1132	272	0.392857	FALSE	0	CO1A2_HUMAN	P08123	FALSE	8_Post_D7_CC
9	6.43732	8aug24_Sunkyung_F4-DIA_60spd_S3-E5_1_7164	Post_D7_CC	9	1132	167	0.627232	TRUE	0	CO1A2_HUMAN	P08123	FALSE	9_Post_D7_CC
10	5.04965	8aug24_Sunkyung_G4-DIA_60spd_S3-F5_1_7171	Post_D7_CC	10	1132	84	0.8125	TRUE	0	CO1A2_HUMAN	P08123	FALSE	10_Post_D7_CC
11	7.92955	8aug24_Sunkyung_C6-DIA_60spd_S3-B7_1_7145	Post_D7_CM	6	1243	304	0.321429	FALSE	0	CO1A2_HUMAN	P08123	FALSE	6_Post_D7_CM
12	7.2553	8aug24_Sunkyung_D6-DIA_60spd_S3-C7_1_7152	Post_D7_CM	7	1243	313	0.301339	FALSE	0	CO1A2_HUMAN	P08123	FALSE	7_Post_D7_CM
13	8.07617	8aug24_Sunkyung_E6-DIA_60spd_S3-D7_1_7159	Post_D7_CM	8	1243	239	0.466518	FALSE	0	CO1A2_HUMAN	P08123	FALSE	8_Post_D7_CM
14	7.76187	8aug24_Sunkyung_F6-DIA_60spd_S3-E7_1_7166	Post_D7_CM	9	1243	234	0.477679	FALSE	0	CO1A2_HUMAN	P08123	FALSE	9_Post_D7_CM
15	7.33526	8aug24_Sunkyung_G6-DIA_60spd_S3-F7_1_7173	Post_D7_CM	10	1243	153	0.658482	TRUE	0	CO1A2_HUMAN	P08123	FALSE	10_Post_D7_CM
16	8.38845	8aug24_Sunkyung_C1b-DIA_60spd_S3-B2_1_7140	Pre_D0	1	1471	322	0.28125	FALSE	0	CO1A2_HUMAN	P08123	FALSE	1_Pre_D0
17	8.67573	8aug24_Sunkyung_D1-DIA_60spd_S3-C2_1_7147	Pre_D0	2	1471	315	0.296875	FALSE	0	CO1A2_HUMAN	P08123	FALSE	2_Pre_D0
18	8.45695	8aug24_Sunkyung_E1-DIA_60spd_S3-D2_1_7154	Pre_D0	3	1471	364	0.1875	FALSE	0	CO1A2_HUMAN	P08123	FALSE	3_Pre_D0
19	8.2826	8aug24_Sunkyung_F1-DIA_60spd_S3-E2_1_7161	Pre_D0	4	1471	262	0.415179	FALSE	0	CO1A2_HUMAN	P08123	FALSE	4_Pre_D0
20	6.30781	8aug24_Sunkyung_G1-DIA_60spd_S3-F2_1_7168	Pre_D0	5	1471	208	0.535714	TRUE	0	CO1A2_HUMAN	P08123	FALSE	5_Pre_D0
21	9.12416	8aug24_Sunkyung_C3-DIA_60spd_S3-B4_1_7142	Pre_D7_CC	1	1284	401	0.104911	FALSE	0	CO1A2_HUMAN	P08123	FALSE	1_Pre_D7_CC
22	8.30182	8aug24_Sunkyung_D3-DIA_60spd_S3-C4_1_7149	Pre_D7_CC	2	1284	334	0.254464	FALSE	0	CO1A2_HUMAN	P08123	FALSE	2_Pre_D7_CC
23	7.3537	8aug24_Sunkyung_E3-DIA_60spd_S3-D4_1_7156	Pre_D7_CC	3	1284	262	0.415179	FALSE	0	CO1A2_HUMAN	P08123	FALSE	3_Pre_D7_CC
24	6.66744	8aug24_Sunkyung_F3-DIA_60spd_S3-E4_1_7163	Pre_D7_CC	4	1284	215	0.520089	TRUE	0	CO1A2_HUMAN	P08123	FALSE	4_Pre_D7_CC
25	5.00435	8aug24_Sunkyung_G3-DIA_60spd_S3-F4_1_7170	Pre_D7_CC	5	1284	72	0.839286	TRUE	0	CO1A2_HUMAN	P08123	FALSE	5_Pre_D7_CC
26	9.11393	8aug24_Sunkyung_C5-DIA_60spd_S3-B6_1_7144	Pre_D7_CM	1	1371	426	0.0491071	FALSE	0	CO1A2_HUMAN	P08123	FALSE	1_Pre_D7_CM
27	6.5922	8aug24_Sunkyung_D5-DIA_60spd_S3-C6_1_7151	Pre_D7_CM	2	1371	168	0.625	TRUE	0	CO1A2_HUMAN	P08123	FALSE	2_Pre_D7_CM
28	8.66338	8aug24_Sunkyung_E5-DIA_60spd_S3-D6_1_7158	Pre_D7_CM	3	1371	349	0.220982	FALSE	0	CO1A2_HUMAN	P08123	FALSE	3_Pre_D7_CM
29	7.9166	8aug24_Sunkyung_F5-DIA_60spd_S3-E6_1_7165	Pre_D7_CM	4	1371	272	0.392857	FALSE	0	CO1A2_HUMAN	P08123	FALSE	4_Pre_D7_CM
30	7.44186	8aug24_Sunkyung_G5-DIA_60spd_S3-F6_1_7172	Pre_D7_CM	5	1371	156	0.651786	TRUE	0	CO1A2_HUMAN	P08123	FALSE	5_Pre_D7_CM
1	5.79509	8aug24_Sunkyung_C2-DIA_60spd_S3-B3_1_7141	Post_D0	6	952	46	0.813765	TRUE	0	CO3_HUMAN	P01024	FALSE	6_Post_D0
2	7.57639	8aug24_Sunkyung_D2-DIA_60spd_S3-C3_1_7148	Post_D0	7	952	228	0.0769231	FALSE	0	CO3_HUMAN	P01024	FALSE	7_Post_D0
3	6.92776	8aug24_Sunkyung_E2-DIA_60spd_S3-D3_1_7155	Post_D0	8	952	195	0.210526	FALSE	0	CO3_HUMAN	P01024	FALSE	8_Post_D0
4	8.34504	8aug24_Sunkyung_F2-DIA_60spd_S3-E3_1_7162	Post_D0	9	952	247	0	FALSE	0	CO3_HUMAN	P01024	FALSE	9_Post_D0
5	7.80104	8aug24_Sunkyung_G2-DIA_60spd_S3-F3_1_7169	Post_D0	10	952	236	0.0445344	FALSE	0	CO3_HUMAN	P01024	FALSE	10_Post_D0
6	5.70638	8aug24_Sunkyung_C4-DIA_60spd_S3-B5_1_7143	Post_D7_CC	6	236	58	0.765182	TRUE	0	CO3_HUMAN	P01024	FALSE	6_Post_D7_CC
8	7.09693	8aug24_Sunkyung_E4-DIA_60spd_S3-D5_1_7157	Post_D7_CC	8	236	178	0.279352	FALSE	0	CO3_HUMAN	P01024	FALSE	8_Post_D7_CC
11	6.51253	8aug24_Sunkyung_C6-DIA_60spd_S3-B7_1_7145	Post_D7_CM	6	444	143	0.421053	FALSE	0	CO3_HUMAN	P01024	FALSE	6_Post_D7_CM
12	5.94459	8aug24_Sunkyung_D6-DIA_60spd_S3-C7_1_7152	Post_D7_CM	7	444	154	0.376518	FALSE	0	CO3_HUMAN	P01024	FALSE	7_Post_D7_CM
13	6.27488	8aug24_Sunkyung_E6-DIA_60spd_S3-D7_1_7159	Post_D7_CM	8	444	94	0.619433	TRUE	0	CO3_HUMAN	P01024	FALSE	8_Post_D7_CM
14	4.70454	8aug24_Sunkyung_F6-DIA_60spd_S3-E7_1_7166	Post_D7_CM	9	444	41	0.834008	TRUE	0	CO3_HUMAN	P01024	FALSE	9_Post_D7_CM
15	4.6141	8aug24_Sunkyung_G6-DIA_60spd_S3-F7_1_7173	Post_D7_CM	10	444	12	0.951417	TRUE	0	CO3_HUMAN	P01024	FALSE	10_Post_D7_CM
16	6.36623	8aug24_Sunkyung_C1b-DIA_60spd_S3-B2_1_7140	Pre_D0	1	655	34	0.862348	TRUE	0	CO3_HUMAN	P01024	FALSE	1_Pre_D0
17	8.19125	8aug24_Sunkyung_D1-DIA_60spd_S3-C2_1_7147	Pre_D0	2	655	229	0.0728745	FALSE	0	CO3_HUMAN	P01024	FALSE	2_Pre_D0
18	8.20634	8aug24_Sunkyung_E1-DIA_60spd_S3-D2_1_7154	Pre_D0	3	655	247	0	FALSE	0	CO3_HUMAN	P01024	FALSE	3_Pre_D0
19	6.51211	8aug24_Sunkyung_F1-DIA_60spd_S3-E2_1_7161	Pre_D0	4	655	91	0.631579	TRUE	0	CO3_HUMAN	P01024	FALSE	4_Pre_D0
20	5.85632	8aug24_Sunkyung_G1-DIA_60spd_S3-F2_1_7168	Pre_D0	5	655	54	0.781377	TRUE	0	CO3_HUMAN	P01024	FALSE	5_Pre_D0
21	7.1439	8aug24_Sunkyung_C3-DIA_60spd_S3-B4_1_7142	Pre_D7_CC	1	669	238	0.0364372	FALSE	0	CO3_HUMAN	P01024	FALSE	1_Pre_D7_CC
22	7.38964	8aug24_Sunkyung_D3-DIA_60spd_S3-C4_1_7149	Pre_D7_CC	2	669	182	0.263158	FALSE	0	CO3_HUMAN	P01024	FALSE	2_Pre_D7_CC
23	7.87617	8aug24_Sunkyung_E3-DIA_60spd_S3-D4_1_7156	Pre_D7_CC	3	669	208	0.157895	FALSE	0	CO3_HUMAN	P01024	FALSE	3_Pre_D7_CC
24	5.29877	8aug24_Sunkyung_F3-DIA_60spd_S3-E4_1_7163	Pre_D7_CC	4	669	41	0.834008	TRUE	0	CO3_HUMAN	P01024	FALSE	4_Pre_D7_CC
26	7.33517	8aug24_Sunkyung_C5-DIA_60spd_S3-B6_1_7144	Pre_D7_CM	1	675	228	0.0769231	FALSE	0	CO3_HUMAN	P01024	FALSE	1_Pre_D7_CM
27	6.26848	8aug24_Sunkyung_D5-DIA_60spd_S3-C6_1_7151	Pre_D7_CM	2	675	99	0.59919	TRUE	0	CO3_HUMAN	P01024	FALSE	2_Pre_D7_CM
28	7.59218	8aug24_Sunkyung_E5-DIA_60spd_S3-D6_1_7158	Pre_D7_CM	3	675	247	0	FALSE	0	CO3_HUMAN	P01024	FALSE	3_Pre_D7_CM
29	6.28525	8aug24_Sunkyung_F5-DIA_60spd_S3-E6_1_7165	Pre_D7_CM	4	675	89	0.639676	TRUE	0	CO3_HUMAN	P01024	FALSE	4_Pre_D7_CM
30	3.6441	8aug24_Sunkyung_G5-DIA_60spd_S3-F6_1_7172	Pre_D7_CM	5	675	12	0.951417	TRUE	0	CO3_HUMAN	P01024	FALSE	5_Pre_D7_CM
1	7.03975	8aug24_Sunkyung_C2-DIA_60spd_S3-B3_1_7141	Post_D0	6	709	126	0.288136	FALSE	0	CO3A1_HUMAN	P02461	FALSE	6_Post_D0
2	7.08795	8aug24_Sunkyung_D2-DIA_60spd_S3-C3_1_7148	Post_D0	7	709	116	0.344633	FALSE	0	CO3A1_HUMAN	P02461	FALSE	7_Post_D0
3	8.33382	8aug24_Sunkyung_E2-DIA_60spd_S3-D3_1_7155	Post_D0	8	709	172	0.0282486	FALSE	0	CO3A1_HUMAN	P02461	FALSE	8_Post_D0
4	9.78452	8aug24_Sunkyung_F2-DIA_60spd_S3-E3_1_7162	Post_D0	9	709	177	0	FALSE	0	CO3A1_HUMAN	P02461	FALSE	9_Post_D0
[truncated: 9,271 more rows]

## Sheet: 3C_counts-per-group
Supplementary Table 3C. Sample counts for identified proteins per group.
Abbreviations: CC, co-culture; CM, conditioned media; D0, [experimental] day 0; D7, [experimental] day 7; Pre, prepubertal; Post, postpubertal.
Identified protein	ProtName	Gene symbol(s)	Pre_D0	Pre_D7_CC	Pre_D7_CM	Post_D0	Post_D7_CC	Post_D7_CM
AK1C1_HUMAN;AK1C3_HUMAN	AK1C1;AK1C3	AKR1C1;AKR1C3	2	2	4	5		4
CO4A_HUMAN;CO4B_HUMAN	CO4A;CO4B	C4A;C4B	4	4	4	4	1	4
DDTL_HUMAN;DOPD_HUMAN	DDTL;DOPD	DDTL;DDT	2	3	2	4	3	3
DEF1_HUMAN;DEF3_HUMAN	DEF1;DEF3	DEFA1; DEFA1B	3	3	2	4	2	4
HS71A_HUMAN;HS71B_HUMAN	HS71A;HS71B	HSPA1A;HSPA1B	5	5	5	5	5	5
POTB2_HUMAN;POTB3_HUMAN;POTEA_HUMAN;POTEB_HUMAN;POTEC_HUMAN;POTEG_HUMAN;POTEH_HUMAN;POTEM_HUMAN	POTB2;POTB3	POTEB2;POTEB3	4	1	2	2	1	3
A2MG_HUMAN	A2MG	A2M	2	2	2	5	3	3
ACLY_HUMAN	ACLY	ACLY	5	5	4	5	5	4
ACTN1_HUMAN	ACTN1	ACTN1	5	5	5	5	5	5
ACTN4_HUMAN	ACTN4	ACTN4	5	5	5	5	5	5
ARP3_HUMAN	ARP3	ACTR3	5	2	4	4	5	4
ADML_HUMAN	ADML	ADM	2	1	3	2		2
ADRM1_HUMAN	ADRM1	ADRM1	1		1	2		3
AEBP1_HUMAN	AEBP1	AEBP1	5	3	4	5	3	4
FETA_HUMAN	FETA	AFP	4					1
SAHH_HUMAN	SAHH	AHCY	5	5	5	5	5	5
AHNK_HUMAN	AHNK	AHNAK	5	2	4	3	2	2
KAD1_HUMAN	KAD1	AK1	4	3	1	4	3	4
AKA12_HUMAN	AKA12	AKAP12	5	2	2	2		4
ALDR_HUMAN	ALDR	AKR1B1	4	4	4	4	4	4
ALBU_HUMAN;cRAP-ALBU_HUMAN	ALBU	ALB	5	5	5	4	5	5
AL9A1_HUMAN	AL9A1	ALDH9A1	2	1	4	4	1	3
ALDOA_HUMAN	ALDOA	ALDOA	5	5	5	5	5	5
THOC4_HUMAN	THOC4	ALYREF	3	1	3	4	1	3
AN32A_HUMAN	AN32A	ANP32A	5	4	5	3	5	4
AN32B_HUMAN	AN32B	ANP32B	3	2	4	3	3	4
ANXA1_HUMAN	ANXA1	ANXA1	5	5	4	4	5	5
ANXA2_HUMAN	ANXA2	ANXA2	5	5	5	5	5	5
ANXA4_HUMAN	ANXA4	ANXA4	3	4	3	3	2	3
ANXA5_HUMAN;cRAP-ANXA5_HUMAN	ANXA5	ANXA5	5	5	5	5	5	5
ANXA6_HUMAN	ANXA6	ANXA6	5	5	5	3	5	3
ANXA7_HUMAN	ANXA7	ANXA7	2	3	3	1	3	2
ACPH_HUMAN	ACPH	APEH	3	1	3	3	1	2
APOD_HUMAN	APOD	APOD	3	2	2	4	2	2
APOE_HUMAN	APOE	APOE	5	5	5	5	4	5
APT_HUMAN	APT	APRT	2	1	2	1		3
ARF4_HUMAN	ARF4	ARF4	5	3	4	4	4	5
ARGI1_HUMAN	ARGI1	ARG1	4	4	4	4	4	4
RHG01_HUMAN	RHG01	ARHGAP1	2	1	2	2	2	3
GDIR1_HUMAN	GDIR1	ARHGDIA	4	5	4	4	4	4
ASSY_HUMAN	ASSY	ASS1	4	3	3	3	2	3
PUR9_HUMAN	PUR9	ATIC	2	1	2	2	1	3
AT1A1_HUMAN	AT1A1	ATP1A1	2		2	2	1	3
ATPB_HUMAN	ATPB	ATP5F1B	5	5	5	5	5	5
VATA_HUMAN	VATA	ATP6V1A	3	2	3	3	2	2
ZA2G_HUMAN	ZA2G	AZGP1	4	3	2	4	5	4
B2MG_HUMAN;cRAP-B2MG_HUMAN	B2MG	B2M	5	5	5	5	4	5
BLMH_HUMAN	BLMH	BLMH	2	5	4	4	3	5
BIEA_HUMAN	BIEA	BLVRA	4	1	4	3	1	3
BLVRB_HUMAN	BLVRB	BLVRB	5	3	2	3	1	3
BMP1_HUMAN	BMP1	BMP1	3	1	3	2	1	3
BASI_HUMAN	BASI	BSG	3	2	3	2	2	3
C1R_HUMAN	C1R	C1R	5	4	5	5	4	5
C1S_HUMAN	C1S	C1S	5	4	5	5	4	5
CO3_HUMAN	CO3	C3	5	4	5	5	2	5
CO7_HUMAN	CO7	C7	2	3	2	3	1	2
CALD1_HUMAN	CALD1	CALD1	5	5	5	5	5	4
CALL3_HUMAN	CALL3	CALML3	3	1	2	2	2	4
CALL5_HUMAN	CALL5	CALML5	3	4	3	5	5	4
CALR_HUMAN	CALR	CALR	5	5	5	5	5	5
CALU_HUMAN	CALU	CALU	5	5	5	5	4	5
CAP1_HUMAN	CAP1	CAP1	5	4	4	5	4	4
CAN1_HUMAN	CAN1	CAPN1	4	1	2	2	1	4
CPNS1_HUMAN	CPNS1	CAPNS1	5	3	5	5	5	5
CAZA1_HUMAN	CAZA1	CAPZA1	5	5	5	5	5	4
CASPE_HUMAN	CASPE	CASP14	3	2	2	3	2	5
CATA_HUMAN;cRAP-CATA_HUMAN	CATA	CAT	5	3	3	4	2	4
CAVN1_HUMAN	CAVN1	CAVIN1	4	5	4	4	3	4
CAVN2_HUMAN	CAVN2	CAVIN2	3	4	4	3	2	2
CBR1_HUMAN	CBR1	CBR1	3	3	5	4	2	3
CCD80_HUMAN	CCD80	CCDC80	5	3	4	5	3	5
TCPB_HUMAN	TCPB	CCT2	5	5	4	5	5	5
TCPG_HUMAN	TCPG	CCT3	5	4	5	5	5	4
TCPD_HUMAN	TCPD	CCT4	4		3	3	5	4
TCPE_HUMAN	TCPE	CCT5	5	3	4	3	3	3
TCPQ_HUMAN	TCPQ	CCT8	5	5	5	5	5	4
CD248_HUMAN	CD248	CD248	5	2	1	2		2
CD44_HUMAN	CD44	CD44	3	4	5	2	2	3
CD59_HUMAN	CD59	CD59	3	1	3	2	1	4
CDSN_HUMAN	CDSN	CDSN	4	4	3	3	4	4
CFA99_HUMAN	CFA99	CFAP99	4	5	3	5	4	4
CFAB_HUMAN	CFAB	CFB	2	1	3	1	1	2
CFAH_HUMAN	CFAH	CFH	3	4	4	3	3	5
CFAI_HUMAN	CFAI	CFI	3	2	2	4	2	2
COF1_HUMAN	COF1	CFL1	5	5	5	4	5	4
CHM4A_HUMAN	CHM4A	CHMP4A	4	3	1	4	2	4
CILP1_HUMAN	CILP1	CILP	3	3	5	5	2	5
CLC11_HUMAN	CLC11	CLEC11A	4	1	4	3	1	4
CLIC1_HUMAN	CLIC1	CLIC1	5	5	4	5	4	4
CSTN1_HUMAN	CSTN1	CLSTN1	3	2	5	3	2	3
CLH1_HUMAN	CLH1	CLTC	5	5	5	5	5	5
CLUS_HUMAN	CLUS	CLU	5	4	4	5	3	5
CNN3_HUMAN	CNN3	CNN3	5	5	5	5	4	4
COCA1_HUMAN	COCA1	COL12A1	5	5	4	5	4	5
COIA1_HUMAN	COIA1	COL18A1	3	3	3	3	2	2
CO1A1_HUMAN	CO1A1	COL1A1	5	5	5	5	5	5
CO1A2_HUMAN	CO1A2	COL1A2	5	5	5	5	5	5
CO3A1_HUMAN	CO3A1	COL3A1	5	4	5	5	3	5
CO4A2_HUMAN	CO4A2	COL4A2	3	2	5	4	4	5
CO6A1_HUMAN	CO6A1	COL6A1	5	5	5	5	5	5
CO6A2_HUMAN	CO6A2	COL6A2	5	4	5	5	5	5
CO6A3_HUMAN	CO6A3	COL6A3	5	5	5	5	5	5
COPA_HUMAN	COPA	COPA	5	4	5	4	5	3
COR1B_HUMAN	COR1B	CORO1B	4	3	3	2	5	3
COR1C_HUMAN	COR1C	CORO1C	5	4	5	5	5	4
CBPA4_HUMAN	CBPA4	CPA4	2	2	1	1	3	5
CBPZ_HUMAN	CBPZ	CPZ	4	3	4	4	3	2
CISY_HUMAN	CISY	CS	3	1	2	2	1	3
CYTC_HUMAN	CYTC	CST3	5	5	5	5	5	5
CYTA_HUMAN	CYTA	CSTA	5	2	4	4	4	4
CYTB_HUMAN	CYTB	CSTB	4	4	3	3	1	3
CATB_HUMAN	CATB	CTSB	5	2	5	4	3	5
CATD_HUMAN;cRAP-CATD_HUMAN	CATD	CTSD	5	5	5	5	5	5
CATZ_HUMAN	CATZ	CTSZ	2	2	3	3	1	4
SRC8_HUMAN	SRC8	CTTN	4	5	4	3	3	4
SYDC_HUMAN	SYDC	DARS1	4	3	4	3	2	4
DCD_HUMAN	DCD	DCD	5	5	5	5	5	5
PGS2_HUMAN	PGS2	DCN	5	4	4	5	2	5
DCTN2_HUMAN	DCTN2	DCTN2	3		2	2	2	2
DDX3X_HUMAN	DDX3X	DDX3X	4	2	4	2	3	4
DDX5_HUMAN	DDX5	DDX5	4	5	4	5	4	4
DESM_HUMAN	DESM	DES	5	5	5	5	5	5
DHX9_HUMAN	DHX9	DHX9	5		2	3	1	3
DNPEP_HUMAN	DNPEP	DNPEP	3		1	1	1	4
DPYL2_HUMAN	DPYL2	DPYSL2	5	3	5	5	5	4
DPYL3_HUMAN	DPYL3	DPYSL3	5	5	5	4	3	4
DSC1_HUMAN	DSC1	DSC1	5	4	5	3	4	5
DSC3_HUMAN	DSC3	DSC3	1	1	1	1	4	3
DSG1_HUMAN	DSG1	DSG1	4	5	5	4	5	5
DESP_HUMAN	DESP	DSP	5	5	5	5	5	5
DEST_HUMAN	DEST	DSTN	5	5	5	5	5	5
DYHC1_HUMAN	DYHC1	DYNC1H1	4	5	5	4	5	5
ECM1_HUMAN	ECM1	ECM1	5	2	4	4	3	5
EF1B_HUMAN	EF1B	EEF1B2	4	1	2	1	2	3
EF1D_HUMAN	EF1D	EEF1D	5	5	5	4	5	4
EF1G_HUMAN	EF1G	EEF1G	5	5	5	5	5	5
EF2_HUMAN	EF2	EEF2	5	5	5	5	5	5
FBLN3_HUMAN	FBLN3	EFEMP1	5	5	5	4	4	5
IF2A_HUMAN	IF2A	EIF2S1	5	4	4	3	2	4
EIF3A_HUMAN	EIF3A	EIF3A	4	5	3	3	4	4
IF4G1_HUMAN	IF4G1	EIF4G1	3	1	2	2	1	1
IF6_HUMAN	IF6	EIF6	4	5	3	4	3	5
EMIL1_HUMAN	EMIL1	EMILIN1	5	4	5	5	4	5
ENOA_HUMAN	ENOA	ENO1	5	5	5	5	5	5
EPIPL_HUMAN	EPIPL	EPPK1	5	4	5	5	5	5
SYEP_HUMAN	SYEP	EPRS1	4	4	4	3	4	4
ERP29_HUMAN	ERP29	ERP29	1	1				3
EZRI_HUMAN	EZRI	EZR	5	5	5	5	5	5
FABP5_HUMAN	FABP5	FABP5	5	4	4	5	4	4
SYFB_HUMAN	SYFB	FARSB	4	2	2	3	2	2
FAS_HUMAN	FAS	FASN	5	4	5	4	5	4
FBLN1_HUMAN	FBLN1	FBLN1	5	5	5	5	5	5
FBLN2_HUMAN	FBLN2	FBLN2	4	3	5	3	4	4
FBLN5_HUMAN	FBLN5	FBLN5	2	3	4	4	4	3
FBN1_HUMAN	FBN1	FBN1	5	4	5	5	4	5
FHL2_HUMAN	FHL2	FHL2	3	5	5	4	5	3
FHL3_HUMAN	FHL3	FHL3	1	1		3		1
FKB10_HUMAN	FKB10	FKBP10	5	5	5	5	5	5
FILA_HUMAN	FILA	FLG	4	2	3	3	3	3
FILA2_HUMAN	FILA2	FLG2	4	5	5	5	5	5
FLNA_HUMAN	FLNA	FLNA	5	5	5	5	5	5
FLNB_HUMAN	FLNB	FLNB	5	5	5	5	5	4
FLNC_HUMAN	FLNC	FLNC	5	5	5	5	5	5
FMOD_HUMAN	FMOD	FMOD	5	4	5	5	5	5
FINC_HUMAN	FINC	FN1	5	5	5	5	5	5
FSCN1_HUMAN	FSCN1	FSCN1	5	4	5	5	5	5
FSTL1_HUMAN	FSTL1	FSTL1	5	4	4	5	4	5
FRIH_HUMAN	FRIH	FTH1	5	4	5	4	5	4
FRIL_HUMAN	FRIL	FTL	4	5	5	3	4	5
G6PD_HUMAN	G6PD	G6PD	5	5	4	5	5	4
GANAB_HUMAN	GANAB	GANAB	4	5	3	4	4	5
G3P_HUMAN	G3P	GAPDH	5	5	5	5	5	5
GBA1_HUMAN	GBA1	GBA1				1		3
GLGB_HUMAN	GLGB	GBE1	5	4	4	3	3	4
GDF15_HUMAN	GDF15	GDF15	5	4	5	5	5	4
GDIB_HUMAN	GDIB	GDI2	5	4	5	5	5	5
BGAL_HUMAN	BGAL	GLB1	4	1	1	3	1	1
LGUL_HUMAN	LGUL	GLO1	2	2	2	4	1	2
GLRX1_HUMAN	GLRX1	GLRX	2	1	3	3	2	4
AATC_HUMAN	AATC	GOT1	5	3	5	3	2	4
AATM_HUMAN	AATM	GOT2	5	3	4	5	3	5
GPC1_HUMAN	GPC1	GPC1	5	5	5	5	5	5
G6PI_HUMAN	G6PI	GPI	5	4	5	5	4	5
GPX1_HUMAN	GPX1	GPX1	3	2	1		2	2
GRN_HUMAN	GRN	GRN	5	3	4	2	4	4
GSDME_HUMAN	GSDME	GSDME	3			1
GELS_HUMAN;cRAP-GELS_HUMAN	GELS	GSN	5	4	5	5	5	5
GSTM3_HUMAN	GSTM3	GSTM3	4	5	4	4	4	4
GSTO1_HUMAN	GSTO1	GSTO1	5	3	3	3	3	4
GSTP1_HUMAN;cRAP-GSTP1_HUMAN	GSTP1	GSTP1	5	5	5	5	5	5
HARS1_HUMAN;cRAP-SYHC_HUMAN	HARS1	HARS1	5	4	4	2	2	2
HBA_HUMAN;cRAP-HBA_HUMAN	HBA	HBA1; HBA2	5	3	1	3		2
HBB_HUMAN;cRAP-HBB_HUMAN	HBB	HBB	5	5	5	5	5	5
HDGF_HUMAN	HDGF	HDGF	3		3	2		2
HEBP1_HUMAN	HEBP1	HEBP1	3	2	3	1	2	2
H37_HUMAN	H37	HIST2H3PS2	5	5	4	5	4	5
HXK1_HUMAN	HXK1	HK1	4		4	3	2	4
HLAA_HUMAN	HLAA	HLA-A	5	4	5	5	5	5
HLAC_HUMAN	HLAC	HLA-C	4	4	5	4	2	3
HNRPC_HUMAN	HNRPC	HNRNPC	5	4	5	5	3	4
HNRH2_HUMAN	HNRH2	HNRNPH2	5	4	3	4	4	4
HNRH3_HUMAN	HNRH3	HNRNPH3	5	2	3	4	1	5
HNRPM_HUMAN	HNRPM	HNRNPM	5	1	4	3	2	4
HNRPR_HUMAN	HNRPR	HNRNPR	4	4	3	4	2	3
HNRPU_HUMAN	HNRPU	HNRNPU	5	4	3	2	1	2
HORN_HUMAN	HORN	HRNR	5	4	5	4	5	4
DHB4_HUMAN	DHB4	HSD17B4	2	1	2	2		3
HS90A_HUMAN	HS90A	HSP90AA1	5	5	5	5	5	5
ENPL_HUMAN	ENPL	HSP90B1	5	5	5	5	5	5
HSP74_HUMAN	HSP74	HSPA4	4	2	3	4	4	3
GRP75_HUMAN	GRP75	HSPA9	4	3	3	3	3	4
HSPB1_HUMAN	HSPB1	HSPB1	5	5	5	5	5	5
HSPB6_HUMAN	HSPB6	HSPB6	4	2	5	4	3	1
PGBM_HUMAN	PGBM	HSPG2	5	4	5	5	5	5
HTRA1_HUMAN	HTRA1	HTRA1	5	5	5	5	5	5
SYIC_HUMAN	SYIC	IARS1	5	4	5	4	4	4
ICAM1_HUMAN	ICAM1	ICAM1	3	2	1	2		1
IDHC_HUMAN	IDHC	IDH1	5	4	5	4	5	5
IBP1_HUMAN	IBP1	IGFBP1	5	4	4	5	4	5
IBP2_HUMAN	IBP2	IGFBP2	4	5	5	5	5	5
IBP3_HUMAN	IBP3	IGFBP3	5	5	5	5	5	5
IBP4_HUMAN	IBP4	IGFBP4	5	5	5	5	5	5
IBP5_HUMAN	IBP5	IGFBP5	5	5	5	5	5	5
IBP6_HUMAN	IBP6	IGFBP6	5	5	5	5	5	5
IBP7_HUMAN	IBP7	IGFBP7	5	5	5	5	5	5
IQGA1_HUMAN	IQGA1	IQGAP1	5	5	5	5	4	5
ISG15_HUMAN	ISG15	ISG15	3	2	2	2	1	2
ISLR_HUMAN	ISLR	ISLR	5	4	5	5	5	5
INO1_HUMAN	INO1	ISYNA1	4	1	4	4	1	1
ITIH2_HUMAN	ITIH2	ITIH2	5	3	3		3	4
JUPI1_HUMAN	JUPI1	JPT1	3		1	1
PLAK_HUMAN	PLAK	JUP	5	5	5	5	5	4
FUBP2_HUMAN	FUBP2	KHSRP	5	5	5	5	4	5
KLK7_HUMAN	KLK7	KLK7				1		3
KPLCE_HUMAN	KPLCE	KPLCE	4	4	1	3	4	3
KPRP_HUMAN	KPRP	KPRP	5	5	5	5	5	5
K1C13_HUMAN	K1C13	KRT13	5	5	5	5	5	5
K1C14_HUMAN	K1C14	KRT14	5	5	5	5	5	5
K1C16_HUMAN	K1C16	KRT16	5	5	5	5	5	5
K1C17_HUMAN	K1C17	KRT17	5	5	5	5	5	5
K1C18_HUMAN	K1C18	KRT18	5	5	5	5	5	5
K1C23_HUMAN	K1C23	KRT23	2	1	3	3	4	3
K1C27_HUMAN	K1C27	KRT27	5	5	5	5	5	5
K2C4_HUMAN	K2C4	KRT4	5	5	5	5	5	5
K2C5_HUMAN	K2C5	KRT5	5	5	5	5	5	5
K2C6A_HUMAN	K2C6A	KRT6A	5	5	5	5	5	5
K2C6B_HUMAN	K2C6B	KRT6B	5	5	5	5	5	5
K2C7_HUMAN	K2C7	KRT7	5	5	5	3	4	3
K22O_HUMAN	K22O	KRT76	1	2		2	3	3
K2C1B_HUMAN	K2C1B	KRT77	5	5	5	5	5	5
K2C78_HUMAN	K2C78	KRT78	5	5	5	5	5	5
K2C79_HUMAN	K2C79	KRT79	5	5	3	5	4	4
K2C8_HUMAN	K2C8	KRT8	5	5	5	5	5	5
K2C80_HUMAN	K2C80	KRT80	2	4	2	3	2	3
KTN1_HUMAN	KTN1	KTN1	4		1	2	1	4
LAMA4_HUMAN	LAMA4	LAMA4	4	3	5	5	3	5
LAMB1_HUMAN	LAMB1	LAMB1	2	3	5	3	3	5
LAMB2_HUMAN	LAMB2	LAMB2	5	4	4	5	4	5
LAMC1_HUMAN	LAMC1	LAMC1	5	4	5	5	5	5
LAMP1_HUMAN	LAMP1	LAMP1	1	1	1	2	2	3
LASP1_HUMAN	LASP1	LASP1	5	5	5	5	5	5
LCN1_HUMAN	LCN1	LCN1	3	5	3	2	4	5
LDHA_HUMAN	LDHA	LDHA	5	5	5	5	5	5
LDHB_HUMAN	LDHB	LDHB	5	5	5	5	5	5
LEG1_HUMAN	LEG1	LGALS1	5	5	5	5	5	5
LEG3_HUMAN	LEG3	LGALS3	5	3	5	5	3	5
LG3BP_HUMAN	LG3BP	LGALS3BP	5	5	5	5	5	5
LEG7_HUMAN	LEG7	LGALS7; LGALS7B	2	3	2	2	1	3
LIMA1_HUMAN	LIMA1	LIMA1	2		1	1		3
LMNA_HUMAN	LMNA	LMNA	5	5	5	5	5	5
LMNB1_HUMAN	LMNB1	LMNB1	5			4		2
LMNB2_HUMAN	LMNB2	LMNB2	5	4	4	4	4	5
LYOX_HUMAN	LYOX	LOX	5	5	5	5	5	5
LKHA4_HUMAN	LKHA4	LTA4H	5	3	4	4	4	4
LTBP2_HUMAN	LTBP2	LTBP2	5	4	5	5	5	5
TRFL_HUMAN;cRAP-TRFL_HUMAN	TRFL	LTF	5	5	5	5	5	5
LUM_HUMAN	LUM	LUM	5	4	5	5	5	5
LXN_HUMAN	LXN	LXN	3	2	2	2	3	3
LYPA1_HUMAN	LYPA1	LYPLA1	2	2		3		1
MACF1_HUMAN	MACF1	MACF1	2		2	2	2	3
MAP4_HUMAN	MAP4	MAP4	3	3	3	2	2	3
MK01_HUMAN	MK01	MAPK1	4	1	4	3		4
MDHC_HUMAN	MDHC	MDH1	5	5	5	5	4	4
EFNMT_HUMAN	EFNMT	METTL13	4	1	2		4	2
MFGM_HUMAN	MFGM	MFGE8	5	4	4	2	2	3
MGP_HUMAN	MGP	MGP	5	4	5	5	5	5
MIF_HUMAN	MIF	MIF	5	5	5	5	5	5
MMP2_HUMAN	MMP2	MMP2	5	4	5	5	5	5
MOES_HUMAN	MOES	MSN	5	5	5	5	5	5
MT2_HUMAN	MT2	MT2A	4	5	4	4	4	5
MVP_HUMAN	MVP	MVP	5	4	5	4	4	5
MXRA5_HUMAN	MXRA5	MXRA5	1	1	3	1	1	2
MYH9_HUMAN	MYH9	MYH9	5	5	5	5	5	5
MYLK_HUMAN	MYLK	MYLK	3	1	2	2	1	2
NACAM_HUMAN	NACAM	NACA	4	5	5	5	5	5
NAGK_HUMAN	NAGK	NAGK	4	4	5	3	4	4
SIAS_HUMAN	SIAS	NANS	3		3	2	2	3
NP1L1_HUMAN	NP1L1	NAP1L1	4	2	3	2	3	2
SYNC_HUMAN	SYNC	NARS1	4	2	3	3	3	4
NUCL_HUMAN	NUCL	NCL	5	5	4	5	5	4
NDRG1_HUMAN	NDRG1	NDRG1	2		1	3		1
NDUF7_HUMAN	NDUF7	NDUFAF7	3	5	5	4	5	5
NIBA2_HUMAN	NIBA2	NIBAN2	3	1	4	2	2	3
NID1_HUMAN	NID1	NID1	5	3	5	5	1	5
NID2_HUMAN	NID2	NID2	4	3	4	5	3	5
NNMT_HUMAN	NNMT	NNMT	3	1	1	3		2
NONO_HUMAN	NONO	NONO	5	4	5	5	5	4
PSA_HUMAN	PSA	NPEPPS	5	5	3	3	3	4
NPM_HUMAN	NPM	NPM1	5	4	4	5	4	5
NRDC_HUMAN	NRDC	NRDC	2	2	1	1		3
NUCB1_HUMAN	NUCB1	NUCB1	5	4	4	5	5	5
NUDC_HUMAN	NUDC	NUDC	1	1	3
P4HA1_HUMAN	P4HA1	P4HA1	4	2	2	3		2
P4HA2_HUMAN	P4HA2	P4HA2	3		2	3
PDIA1_HUMAN	PDIA1	P4HB	5	5	5	4	5	5
PALM_HUMAN	PALM	PALM	3	3	4	4	2	3
PARK7_HUMAN	PARK7	PARK7	3	1	2	3	1	3
PCOC1_HUMAN	PCOC1	PCOLCE	5	3	4	5	2	5
PDC6I_HUMAN	PDC6I	PDCD6IP	4	2	3	3		3
PDIA3_HUMAN	PDIA3	PDIA3	5	5	5	5	5	5
PDIA4_HUMAN	PDIA4	PDIA4	5	4	5	3	5	5
PDIA6_HUMAN	PDIA6	PDIA6	5	5	4	5	5	4
PDLI3_HUMAN	PDLI3	PDLIM3	5	4	5	4	5	4
PDLI4_HUMAN	PDLI4	PDLIM4	3		2	2		2
PDLI5_HUMAN	PDLI5	PDLIM5	4	4	2	4	2	3
PDLI7_HUMAN	PDLI7	PDLIM7	2	1	1	3	2	4
PEPD_HUMAN	PEPD	PEPD	1		1	2	3	1
PFKAP_HUMAN	PFKAP	PFKP	4	4	3	3	2	3
PROF1_HUMAN	PROF1	PFN1	5	5	5	5	5	5
6PGD_HUMAN	6PGD	PGD	3	1	3	2	3	4
PGK1_HUMAN	PGK1	PGK1	5	5	5	5	5	5
6PGL_HUMAN	6PGL	PGLS	5	4	4	4	5	5
PGM1_HUMAN	PGM1	PGM1	5	4	5	5	5	5
PGM2_HUMAN	PGM2	PGM2	5	5	5	5	4	5
AGM1_HUMAN	AGM1	PGM3	3	3	3	3	2	2
SERA_HUMAN	SERA	PHGDH	5	1	2	4	2	3
PIP_HUMAN	PIP	PIP	2	4	1	4	4	4
KPYM_HUMAN	KPYM	PKM	5	5	5	5	5	5
PKP1_HUMAN	PKP1	PKP1	3	3	1	3	4	4
PA2GA_HUMAN	PA2GA	PLA2G2A	2	1	2	4		1
PLD3_HUMAN	PLD3	PLD3	3	3	2	4	2	3
PLEC_HUMAN	PLEC	PLEC	5	5	5	5	5	5
PLIN3_HUMAN	PLIN3	PLIN3	3		1	2	1	1
PLOD1_HUMAN	PLOD1	PLOD1	5	5	5	5	4	5
PLOD2_HUMAN	PLOD2	PLOD2	4	1	4	2	3	4
PLP2_HUMAN	PLP2	PLP2		1	2	1		3
PLTP_HUMAN	PLTP	PLTP	5	4	5	5	4	5
PNPH_HUMAN	PNPH	PNP	5	3	5	3	3	5
POF1B_HUMAN	POF1B	POF1B	2	3		2	2	2
IPYR_HUMAN	IPYR	PPA1	2	1	2	1	2	3
PPIA_HUMAN;cRAP-PPIA_HUMAN	PPIA	PPIA	5	5	5	5	5	5
PPIB_HUMAN	PPIB	PPIB	5	5	5	5	5	5
PEPL_HUMAN	PEPL	PPL	3	3	1	2	3	3
MYPT1_HUMAN	MYPT1	PPP1R12A	2		2	2	2	3
PRDX1_HUMAN;cRAP-PRDX1_HUMAN	PRDX1	PRDX1	5	5	5	5	5	5
PRDX2_HUMAN	PRDX2	PRDX2	5	5	5	5	5	5
PRDX3_HUMAN	PRDX3	PRDX3	4	3	3	4	2	3
PRDX4_HUMAN	PRDX4	PRDX4	3	4	3	2	5	4
PRDX5_HUMAN	PRDX5	PRDX5	5	5	5	3	5	3
PRDX6_HUMAN	PRDX6	PRDX6	5	5	5	5	5	5
GLU2B_HUMAN	GLU2B	PRKCSH	5	5	4	5	5	5
PRKDC_HUMAN	PRKDC	PRKDC	1		2	2		3
PRIO_HUMAN	PRIO	PRNP	2	2	3	3	1	3
EPCR_HUMAN	EPCR	PROCR	2	2	4	4	3	3
PRS23_HUMAN	PRS23	PRSS23	4	3	3	3	3	3
TRY3_HUMAN	TRY3	PRSS3	5	5	5	5	5	5
SAP_HUMAN	SAP	PSAP	4	2	2	3	2	5
PSA7_HUMAN	PSA7	PSMA7	5	4	4	5	4	5
PSB1_HUMAN	PSB1	PSMB1	5	3	4	4	4	4
PSB4_HUMAN	PSB4	PSMB4	3	4	2	4	3	5
PSB5_HUMAN	PSB5	PSMB5	5	4	4	4	3	5
PSB6_HUMAN	PSB6	PSMB6	5		1	4	2	4
PSB8_HUMAN	PSB8	PSMB8	2			3		2
PSD12_HUMAN	PSD12	PSMD12	4	4	4	3	3	3
PSME1_HUMAN	PSME1	PSME1	4	1	4	4	4	3
PTBP1_HUMAN	PTBP1	PTBP1	4	2	4	2	1	4
PTMA_HUMAN	PTMA	PTMA	5	5	5	5	5	5
PTX3_HUMAN	PTX3	PTX3	5	5	5	5	5	5
PXDN_HUMAN	PXDN	PXDN	5	4	4	4	5	5
SYQ_HUMAN	SYQ	QARS1	4	1	2	3	2	3
QSOX1_HUMAN	QSOX1	QSOX1	5	5	5	5	5	5
TIG1_HUMAN	TIG1	RARRES1	2	1	3	3		2
RARR2_HUMAN	RARR2	RARRES2	4	2	4	4	3	5
SYRC_HUMAN	SYRC	RARS	3		3	2	1	4
RCN1_HUMAN	RCN1	RCN1	5	5	5	5	5	5
RCN3_HUMAN	RCN3	RCN3	5	5	5	5	5	5
RECQ1_HUMAN	RECQ1	RECQL	4	2	2	4	3	4
RINI_HUMAN	RINI	RNH1	5	5	4	4	5	5
AMPB_HUMAN	AMPB	RNPEP	4	4	4	4	3	4
RL13_HUMAN	RL13	RPL13	4	3	4	4	4	4
RL13A_HUMAN	RL13A	RPL13A	3	3	4	2	4	4
RL14_HUMAN	RL14	RPL14	5	5	5	5	5	4
RL18_HUMAN	RL18	RPL18	5	5	4	4	3	4
RL27A_HUMAN	RL27A	RPL27A	1	2	2	2	3	2
RL4_HUMAN	RL4	RPL4	4	4	4	3	4	4
RL6_HUMAN	RL6	RPL6	2	1	3	2	1	2
RL7_HUMAN	RL7	RPL7	4	4	3	4	5	4
RLA0_HUMAN	RLA0	RPLP0	5	5	4	3	5	4
RLA1_HUMAN	RLA1	RPLP1	4	4	2	3	2	3
RLA2_HUMAN	RLA2	RPLP2	5	4	3	2	5	4
RS10_HUMAN	RS10	RPS10	4	1	3	3	1	2
RS21_HUMAN	RS21	RPS21	3	3	2	4	1	4
RS3_HUMAN	RS3	RPS3	5	5	4	5	5	5
RS5_HUMAN	RS5	RPS5	4	3	4	4	2	3
RRBP1_HUMAN	RRBP1	RRBP1	5	4	4	4	4	4
S10AB_HUMAN	S10AB	S100A11	4	5	5	5	5	5
S10AG_HUMAN	S10AG	S100A16	2		1	2		3
S10A6_HUMAN	S10A6	S100A6	5	5	5	5	5	4
S10A7_HUMAN	S10A7	S100A7	2	2	1	3	2	1
S10A8_HUMAN	S10A8	S100A8	1	2	2	3		2
SARNP_HUMAN	SARNP	SARNP	1		2	3	1	2
SYSC_HUMAN	SYSC	SARS1	4	2	2	2	2	4
SBSN_HUMAN	SBSN	SBSN	2	2	1	2	1	4
SCG2_HUMAN	SCG2	SCG2	2	1	4	2	1	1
SCRN1_HUMAN	SCRN1	SCRN1	5	1	3	1	5	2
SC31A_HUMAN	SC31A	SEC31A	3	1	4	3	3	4
SEPT8_HUMAN	SEPT8	SEPTIN8	2	3	3	1	1	1
SEPT9_HUMAN	SEPT9	SEPTIN9	4	2	3	4		2
AACT_HUMAN	AACT	SERPINA3	2	2	3	4	1	3
SPB12_HUMAN	SPB12	SERPINB12	2	4	1	3	3	4
PAI2_HUMAN	PAI2	SERPINB2	1	3	2	1	3	4
PAI1_HUMAN	PAI1	SERPINE1	5	5	5	5	5	5
GDN_HUMAN	GDN	SERPINE2	5	5	5	5	4	5
PEDF_HUMAN	PEDF	SERPINF1	3	3	4	4	2	4
IC1_HUMAN	IC1	SERPING1	4	3	4	5	3	4
SERPH_HUMAN	SERPH	SERPINH1	5	5	5	5	5	5
SF3B2_HUMAN	SF3B2	SF3B2	3	2	2	2	2	2
1433S_HUMAN	1433S	SFN	5	5	5	5	5	5
SFRP4_HUMAN	SFRP4	SFRP4	2	1	3	4		2
SIL1_HUMAN	SIL1	SIL1	1		3	2	1	2
SND1_HUMAN	SND1	SND1	5	3	5	5	3	5
SODE_HUMAN	SODE	SOD3	4	4	5	5	4	5
SPRC_HUMAN	SPRC	SPARC	5	5	5	5	5	5
SPON2_HUMAN	SPON2	SPON2	4	1	4	4	2	5
SPR1B_HUMAN	SPR1B	SPRR1B	2	2	3	3	3	4
SPR2D_HUMAN	SPR2D	SPRR2D	1	2	2	2	2	3
SPTN1_HUMAN	SPTN1	SPTAN1	5	5	5	5	5	5
SPTB2_HUMAN	SPTB2	SPTBN1	5	5	5	5	5	5
SPEE_HUMAN	SPEE	SRM	5	3	2	2	4	4
SRPX_HUMAN	SRPX	SRPX	3	2	4	3	3	5
SRPX2_HUMAN	SRPX2	SRPX2	3	2	3	5	3	5
SSBP_HUMAN	SSBP	SSBP1	4	1	3	5	2	4
F10A1_HUMAN	F10A1	ST13	5	3	2	3	2	4
STC2_HUMAN	STC2	STC2	4	3	4	4	3	4
STIP1_HUMAN	STIP1	STIP1	5	3	3	3	4	4
STOM_HUMAN	STOM	STOM	4	5	3	4	4	4
SULF2_HUMAN	SULF2	SULF2	3	2	4	3	2	3
SYNP2_HUMAN	SYNP2	SYNPO2	4	2	2	3	4	3
TAGL_HUMAN	TAGL	TAGLN	5	5	5	5	5	5
TAGL2_HUMAN	TAGL2	TAGLN2	5	5	5	5	5	5
TALDO_HUMAN	TALDO	TALDO1	5	3	3	4	2	4
TX1B3_HUMAN	TX1B3	TAX1BP3	4			2		1
TBCA_HUMAN	TBCA	TBCA	3	2	3	4	2	3
TCPA_HUMAN	TCPA	TCP1	5	4	3	4	5	5
TRFE_HUMAN;cRAP-TRFE_HUMAN	TRFE	TF		5	5	1	5	4
TFG_HUMAN	TFG	TFG	4		3	2	2	2
TFR1_HUMAN	TFR1	TFRC	2	4	3	3	2	2
BGH3_HUMAN	BGH3	TGFBI	5	5	5	5	5	5
TGM1_HUMAN	TGM1	TGM1	1	2	2	3	2	4
TGM3_HUMAN	TGM3	TGM3	2	3	2	3	4	4
TSP1_HUMAN	TSP1	THBS1	5	5	5	5	5	5
TSP2_HUMAN	TSP2	THBS2	5	4	5	5	5	5
TIMP1_HUMAN	TIMP1	TIMP1	5	5	5	5	5	5
TINAL_HUMAN	TINAL	TINAGL1	2	2	3	2	1	2
KITM_HUMAN	KITM	TK2	5	4	3	4	1	4
TKT_HUMAN	TKT	TKT	5	5	5	5	5	5
TLN1_HUMAN	TLN1	TLN1	5	5	5	5	5	5
TYB4_HUMAN	TYB4	TMSB4X	4	4	5	4	5	5
TENA_HUMAN	TENA	TNC	1	1	4	3		3
TPD54_HUMAN	TPD54	TPD52L2	4		2	2		2
TPIS_HUMAN	TPIS	TPI1	5	5	5	5	5	5
TPM4_HUMAN	TPM4	TPM4	5	5	5	5	5	5
TPP2_HUMAN	TPP2	TPP2	2	2	3	2	2	4
TBA1C_HUMAN	TBA1C	TUBA1C	5	5	5	5	5	5
TBB6_HUMAN	TBB6	TUBB6	3	2	4	4	3	4
EFTU_HUMAN	EFTU	TUFM	5	5	5	5	5	5
TWF1_HUMAN	TWF1	TWF1	3	1	1	2		4
THIO_HUMAN;cRAP-THIO_HUMAN	THIO	TXN	5	5	5	5	5	5
TXND5_HUMAN	TXND5	TXNDC5	5	5	5	5	5	5
TRXR1_HUMAN	TRXR1	TXNRD1	5	5	5	5	5	5
UAP1_HUMAN	UAP1	UAP1	5	1	3	3	3	3
UBA1_HUMAN	UBA1	UBA1	5	5	5	5	5	5
UB2V1_HUMAN	UB2V1	UBE2V1	4	2	2	4	1	2
UCHL1_HUMAN	UCHL1	UCHL1	5	5	5	5	5	5
UGDH_HUMAN	UGDH	UGDH	5	4	5	4	4	4
USO1_HUMAN	USO1	USO1	4	3	3	3	3	3
SYVC_HUMAN	SYVC	VARS1	3	2	3	2	2	4
VASN_HUMAN	VASN	VASN	5	4	4	5	3	5
VAT1_HUMAN	VAT1	VAT1	5	5	5	5	5	5
CSPG2_HUMAN	CSPG2	VCAN	5	4	5	5	5	5
VINC_HUMAN	VINC	VCL	5	5	5	5	5	5
VIME_HUMAN	VIME	VIM	5	5	5	5	5	5
VPS35_HUMAN	VPS35	VPS35	5	4	4	5	2	4
WDR1_HUMAN	WDR1	WDR1	5	5	5	5	5	5
WFD12_HUMAN	WFD12	WFDC12	1				2	3
XRCC5_HUMAN	XRCC5	XRCC5	3	2	3	3	3	4
XRCC6_HUMAN	XRCC6	XRCC6	5	5	4	4	5	4
1433B_HUMAN	1433B	YWHAB	5	5	5	5	5	5
1433F_HUMAN	1433F	YWHAH	4	1	2	3		2
1433Z_HUMAN	1433Z	YWHAZ	5	5	5	5	5	5
ZYX_HUMAN	ZYX	ZYX	5	4	5	3	5	4

## Sheet: 3D_d0-pre-post
Supplementary Table 3D. Proteins identified in Pre-D0 and Post-D0 samples with threshold for detection in n≥3 of 5 samples in a group.
Abbreviations: Pre, prepubertal; Post, postpubertal.
ProtName	Gene symbol(s)	Category
1433B	YWHAB	Shared
1433F	YWHAH	Shared
1433S	SFN	Shared
1433Z	YWHAZ	Shared
6PGL	PGLS	Shared
AATC	GOT1	Shared
AATM	GOT2	Shared
ACLY	ACLY	Shared
ACPH	APEH	Shared
ACTN1	ACTN1	Shared
ACTN4	ACTN4	Shared
AEBP1	AEBP1	Shared
AGM1	PGM3	Shared
AHNK	AHNAK	Shared
ALBU	ALB	Shared
ALDOA	ALDOA	Shared
ALDR	AKR1B1	Shared
AMPB	RNPEP	Shared
AN32A	ANP32A	Shared
AN32B	ANP32B	Shared
ANXA1	ANXA1	Shared
ANXA2	ANXA2	Shared
ANXA4	ANXA4	Shared
ANXA5	ANXA5	Shared
ANXA6	ANXA6	Shared
APOD	APOD	Shared
APOE	APOE	Shared
ARF4	ARF4	Shared
ARGI1	ARG1	Shared
ARP3	ACTR3	Shared
ASSY	ASS1	Shared
ATPB	ATP5F1B	Shared
B2MG	B2M	Shared
BGAL	GLB1	Shared
BGH3	TGFBI	Shared
BIEA	BLVRA	Shared
BLVRB	BLVRB	Shared
C1R	C1R	Shared
C1S	C1S	Shared
CALD1	CALD1	Shared
CALL5	CALML5	Shared
CALR	CALR	Shared
CALU	CALU	Shared
CAP1	CAP1	Shared
CASPE	CASP14	Shared
CATA	CAT	Shared
CATB	CTSB	Shared
CATD	CTSD	Shared
CAVN1	CAVIN1	Shared
CAVN2	CAVIN2	Shared
CAZA1	CAPZA1	Shared
CBPZ	CPZ	Shared
CBR1	CBR1	Shared
CCD80	CCDC80	Shared
CDSN	CDSN	Shared
CFA99	CFAP99	Shared
CFAH	CFH	Shared
CFAI	CFI	Shared
CHM4A	CHMP4A	Shared
CILP1	CILP	Shared
CLC11	CLEC11A	Shared
CLH1	CLTC	Shared
CLIC1	CLIC1	Shared
CLUS	CLU	Shared
CNN3	CNN3	Shared
CO1A1	COL1A1	Shared
CO1A2	COL1A2	Shared
CO3	C3	Shared
CO3A1	COL3A1	Shared
CO4A;CO4B	C4A;C4B	Shared
CO4A2	COL4A2	Shared
CO6A1	COL6A1	Shared
CO6A2	COL6A2	Shared
CO6A3	COL6A3	Shared
COCA1	COL12A1	Shared
COF1	CFL1	Shared
COIA1	COL18A1	Shared
COPA	COPA	Shared
COR1C	CORO1C	Shared
CPNS1	CAPNS1	Shared
CSPG2	VCAN	Shared
CSTN1	CLSTN1	Shared
CYTA	CSTA	Shared
CYTB	CSTB	Shared
CYTC	CST3	Shared
DCD	DCD	Shared
DDX5	DDX5	Shared
DEF1;DEF3	DEFA1; DEFA1B	Shared
DESM	DES	Shared
DESP	DSP	Shared
DEST	DSTN	Shared
DHX9	DHX9	Shared
DPYL2	DPYSL2	Shared
DPYL3	DPYSL3	Shared
DSC1	DSC1	Shared
DSG1	DSG1	Shared
DYHC1	DYNC1H1	Shared
ECM1	ECM1	Shared
EF1D	EEF1D	Shared
EF1G	EEF1G	Shared
EF2	EEF2	Shared
EFTU	TUFM	Shared
EIF3A	EIF3A	Shared
EMIL1	EMILIN1	Shared
ENOA	ENO1	Shared
ENPL	HSP90B1	Shared
EPIPL	EPPK1	Shared
EZRI	EZR	Shared
F10A1	ST13	Shared
FABP5	FABP5	Shared
FAS	FASN	Shared
FBLN1	FBLN1	Shared
FBLN2	FBLN2	Shared
FBLN3	EFEMP1	Shared
FBN1	FBN1	Shared
FHL2	FHL2	Shared
FILA	FLG	Shared
FILA2	FLG2	Shared
FINC	FN1	Shared
FKB10	FKBP10	Shared
FLNA	FLNA	Shared
FLNB	FLNB	Shared
FLNC	FLNC	Shared
FMOD	FMOD	Shared
FRIH	FTH1	Shared
FRIL	FTL	Shared
FSCN1	FSCN1	Shared
FSTL1	FSTL1	Shared
FUBP2	KHSRP	Shared
G3P	GAPDH	Shared
G6PD	G6PD	Shared
G6PI	GPI	Shared
GANAB	GANAB	Shared
GDF15	GDF15	Shared
GDIB	GDI2	Shared
GDIR1	ARHGDIA	Shared
GDN	SERPINE2	Shared
GELS	GSN	Shared
GLGB	GBE1	Shared
GLU2B	PRKCSH	Shared
GPC1	GPC1	Shared
GRP75	HSPA9	Shared
GSTM3	GSTM3	Shared
GSTO1	GSTO1	Shared
GSTP1	GSTP1	Shared
H37	HIST2H3PS2	Shared
HBA	HBA1; HBA2	Shared
HBB	HBB	Shared
HLAA	HLA-A	Shared
HLAC	HLA-C	Shared
HNRH2	HNRNPH2	Shared
HNRH3	HNRNPH3	Shared
HNRPC	HNRNPC	Shared
HNRPM	HNRNPM	Shared
HNRPR	HNRNPR	Shared
HORN	HRNR	Shared
HS71A;HS71B	HSPA1A;HSPA1B	Shared
HS90A	HSP90AA1	Shared
HSP74	HSPA4	Shared
HSPB1	HSPB1	Shared
HSPB6	HSPB6	Shared
HTRA1	HTRA1	Shared
HXK1	HK1	Shared
IBP1	IGFBP1	Shared
IBP2	IGFBP2	Shared
IBP3	IGFBP3	Shared
IBP4	IGFBP4	Shared
IBP5	IGFBP5	Shared
IBP6	IGFBP6	Shared
IBP7	IGFBP7	Shared
IC1	SERPING1	Shared
IDHC	IDH1	Shared
IF2A	EIF2S1	Shared
IF6	EIF6	Shared
INO1	ISYNA1	Shared
IQGA1	IQGAP1	Shared
ISLR	ISLR	Shared
K1C13	KRT13	Shared
K1C14	KRT14	Shared
K1C16	KRT16	Shared
K1C17	KRT17	Shared
K1C18	KRT18	Shared
K1C27	KRT27	Shared
K2C1B	KRT77	Shared
K2C4	KRT4	Shared
K2C5	KRT5	Shared
K2C6A	KRT6A	Shared
K2C6B	KRT6B	Shared
K2C7	KRT7	Shared
K2C78	KRT78	Shared
K2C79	KRT79	Shared
K2C8	KRT8	Shared
KAD1	AK1	Shared
KITM	TK2	Shared
KPLCE	KPLCE	Shared
KPRP	KPRP	Shared
KPYM	PKM	Shared
LAMA4	LAMA4	Shared
LAMB2	LAMB2	Shared
LAMC1	LAMC1	Shared
LASP1	LASP1	Shared
LDHA	LDHA	Shared
LDHB	LDHB	Shared
LEG1	LGALS1	Shared
LEG3	LGALS3	Shared
LG3BP	LGALS3BP	Shared
LKHA4	LTA4H	Shared
LMNA	LMNA	Shared
LMNB1	LMNB1	Shared
LMNB2	LMNB2	Shared
LTBP2	LTBP2	Shared
LUM	LUM	Shared
LYOX	LOX	Shared
MDHC	MDH1	Shared
MGP	MGP	Shared
MIF	MIF	Shared
MK01	MAPK1	Shared
MMP2	MMP2	Shared
MOES	MSN	Shared
MT2	MT2A	Shared
MVP	MVP	Shared
MYH9	MYH9	Shared
NACAM	NACA	Shared
NAGK	NAGK	Shared
NDUF7	NDUFAF7	Shared
NID1	NID1	Shared
NID2	NID2	Shared
NNMT	NNMT	Shared
NONO	NONO	Shared
NPM	NPM1	Shared
NUCB1	NUCB1	Shared
NUCL	NCL	Shared
P4HA1	P4HA1	Shared
P4HA2	P4HA2	Shared
PAI1	SERPINE1	Shared
PALM	PALM	Shared
PARK7	PARK7	Shared
PCOC1	PCOLCE	Shared
PDC6I	PDCD6IP	Shared
PDIA1	P4HB	Shared
PDIA3	PDIA3	Shared
PDIA4	PDIA4	Shared
PDIA6	PDIA6	Shared
PDLI3	PDLIM3	Shared
PDLI5	PDLIM5	Shared
PEDF	SERPINF1	Shared
PFKAP	PFKP	Shared
PGBM	HSPG2	Shared
PGK1	PGK1	Shared
PGM1	PGM1	Shared
PGM2	PGM2	Shared
PGS2	DCN	Shared
PKP1	PKP1	Shared
PLAK	JUP	Shared
PLD3	PLD3	Shared
PLEC	PLEC	Shared
PLOD1	PLOD1	Shared
PLTP	PLTP	Shared
PNPH	PNP	Shared
PPIA	PPIA	Shared
PPIB	PPIB	Shared
PRDX1	PRDX1	Shared
PRDX2	PRDX2	Shared
PRDX3	PRDX3	Shared
PRDX5	PRDX5	Shared
PRDX6	PRDX6	Shared
PROF1	PFN1	Shared
PRS23	PRSS23	Shared
PSA	NPEPPS	Shared
PSA7	PSMA7	Shared
PSB1	PSMB1	Shared
PSB4	PSMB4	Shared
PSB5	PSMB5	Shared
PSB6	PSMB6	Shared
PSD12	PSMD12	Shared
PSME1	PSME1	Shared
PTMA	PTMA	Shared
PTX3	PTX3	Shared
PXDN	PXDN	Shared
QSOX1	QSOX1	Shared
RARR2	RARRES2	Shared
RCN1	RCN1	Shared
RCN3	RCN3	Shared
RECQ1	RECQL	Shared
RINI	RNH1	Shared
RL13	RPL13	Shared
RL14	RPL14	Shared
RL18	RPL18	Shared
RL4	RPL4	Shared
RL7	RPL7	Shared
RLA0	RPLP0	Shared
RLA1	RPLP1	Shared
RRBP1	RRBP1	Shared
RS10	RPS10	Shared
RS21	RPS21	Shared
RS3	RPS3	Shared
RS5	RPS5	Shared
S10A6	S100A6	Shared
S10AB	S100A11	Shared
SAHH	AHCY	Shared
SAP	PSAP	Shared
SC31A	SEC31A	Shared
SEPT9	SEPTIN9	Shared
SERA	PHGDH	Shared
SERPH	SERPINH1	Shared
SND1	SND1	Shared
SODE	SOD3	Shared
SPON2	SPON2	Shared
SPRC	SPARC	Shared
SPTB2	SPTBN1	Shared
SPTN1	SPTAN1	Shared
SRC8	CTTN	Shared
SRPX	SRPX	Shared
SRPX2	SRPX2	Shared
SSBP	SSBP1	Shared
STC2	STC2	Shared
STIP1	STIP1	Shared
STOM	STOM	Shared
SULF2	SULF2	Shared
SYDC	DARS1	Shared
SYEP	EPRS1	Shared
SYFB	FARSB	Shared
SYIC	IARS1	Shared
SYNC	NARS1	Shared
SYNP2	SYNPO2	Shared
SYQ	QARS1	Shared
TAGL	TAGLN	Shared
TAGL2	TAGLN2	Shared
TALDO	TALDO1	Shared
TBA1C	TUBA1C	Shared
TBB6	TUBB6	Shared
TBCA	TBCA	Shared
TCPA	TCP1	Shared
TCPB	CCT2	Shared
TCPD	CCT4	Shared
TCPE	CCT5	Shared
TCPG	CCT3	Shared
TCPQ	CCT8	Shared
THIO	TXN	Shared
THOC4	ALYREF	Shared
TIMP1	TIMP1	Shared
TKT	TKT	Shared
TLN1	TLN1	Shared
TPIS	TPI1	Shared
TPM4	TPM4	Shared
TRFL	LTF	Shared
TRXR1	TXNRD1	Shared
TRY3	PRSS3	Shared
TSP1	THBS1	Shared
TSP2	THBS2	Shared
TXND5	TXNDC5	Shared
TYB4	TMSB4X	Shared
UAP1	UAP1	Shared
UB2V1	UBE2V1	Shared
UBA1	UBA1	Shared
UCHL1	UCHL1	Shared
UGDH	UGDH	Shared
USO1	USO1	Shared
VASN	VASN	Shared
VAT1	VAT1	Shared
VATA	ATP6V1A	Shared
VIME	VIM	Shared
VINC	VCL	Shared
VPS35	VPS35	Shared
WDR1	WDR1	Shared
XRCC5	XRCC5	Shared
XRCC6	XRCC6	Shared
ZA2G	AZGP1	Shared
ZYX	ZYX	Shared
6PGD	PGD	Pre only
AKA12	AKAP12	Pre only
BASI	BSG	Pre only
BMP1	BMP1	Pre only
CALL3	CALML3	Pre only
CAN1	CAPN1	Pre only
CD248	CD248	Pre only
CD44	CD44	Pre only
CD59	CD59	Pre only
CISY	CS	Pre only
COR1B	CORO1B	Pre only
DCTN2	DCTN2	Pre only
DDX3X	DDX3X	Pre only
DNPEP	DNPEP	Pre only
EF1B	EEF1B2	Pre only
EFNMT	METTL13	Pre only
FETA	AFP	Pre only
GPX1	GPX1	Pre only
GRN	GRN	Pre only
GSDME	GSDME	Pre only
HARS1	HARS1	Pre only
HDGF	HDGF	Pre only
HEBP1	HEBP1	Pre only
HNRPU	HNRNPU	Pre only
ICAM1	ICAM1	Pre only
IF4G1	EIF4G1	Pre only
ISG15	ISG15	Pre only
ITIH2	ITIH2	Pre only
JUPI1	JPT1	Pre only
KTN1	KTN1	Pre only
LCN1	LCN1	Pre only
LXN	LXN	Pre only
MAP4	MAP4	Pre only
MFGM	MFGE8	Pre only
MYLK	MYLK	Pre only
NIBA2	NIBAN2	Pre only
NP1L1	NAP1L1	Pre only
PDLI4	PDLIM4	Pre only
PEPL	PPL	Pre only
PLIN3	PLIN3	Pre only
PLOD2	PLOD2	Pre only
POTB2;POTB3	POTEB2;POTEB3	Pre only
PRDX4	PRDX4	Pre only
PTBP1	PTBP1	Pre only
RL13A	RPL13A	Pre only
RLA2	RPLP2	Pre only
SCRN1	SCRN1	Pre only
SF3B2	SF3B2	Pre only
SIAS	NANS	Pre only
SPEE	SRM	Pre only
SYRC	RARS	Pre only
SYSC	SARS1	Pre only
SYVC	VARS1	Pre only
TFG	TFG	Pre only
TPD54	TPD52L2	Pre only
TWF1	TWF1	Pre only
TX1B3	TAX1BP3	Pre only
A2MG	A2M	Post only
AACT	SERPINA3	Post only
AK1C1;AK1C3	AKR1C1;AKR1C3	Post only
AL9A1	ALDH9A1	Post only
BLMH	BLMH	Post only
CATZ	CTSZ	Post only
CO7	C7	Post only
DDTL;DOPD	DDTL;DDT	Post only
EPCR	PROCR	Post only
FBLN5	FBLN5	Post only
FHL3	FHL3	Post only
GLRX1	GLRX	Post only
K1C23	KRT23	Post only
K2C80	KRT80	Post only
LAMB1	LAMB1	Post only
LGUL	GLO1	Post only
LYPA1	LYPLA1	Post only
NDRG1	NDRG1	Post only
PA2GA	PLA2G2A	Post only
PDLI7	PDLIM7	Post only
PIP	PIP	Post only
PRIO	PRNP	Post only
PSB8	PSMB8	Post only
S10A7	S100A7	Post only
S10A8	S100A8	Post only
SARNP	SARNP	Post only
SFRP4	SFRP4	Post only
SPB12	SERPINB12	Post only
SPR1B	SPRR1B	Post only
TENA	TNC	Post only
TFR1	TFRC	Post only
TGM1	TGM1	Post only
TGM3	TGM3	Post only
TIG1	RARRES1	Post only

## Sheet: 3E_cc-cm
Supplementary Table 3E. Proteins identified in CC and CM samples with threshold for detection in n≥3 of 5 samples in a group.
Abbreviations: CC, co-culture; CM, conditioned media; Pre, prepubertal; Post, postpubertal.
ProtName	Gene symbol(s)	Category (Pre)	Category (Post)
1433B	YWHAB	Shared	Shared
1433S	SFN	Shared	Shared
1433Z	YWHAZ	Shared	Shared
6PGD	PGD	CM only	Shared
6PGL	PGLS	Shared	Shared
A2MG	A2M		Shared
AACT	SERPINA3	CM only	CM only
AATC	GOT1	Shared	CM only
AATM	GOT2	Shared	Shared
ACLY	ACLY	Shared	Shared
ACPH	APEH	CM only
ACTN1	ACTN1	Shared	Shared
ACTN4	ACTN4	Shared	Shared
ADML	ADM	CM only
ADRM1	ADRM1		CM only
AEBP1	AEBP1	Shared	Shared
AGM1	PGM3	Shared
AHNK	AHNAK	CM only
AK1C1;AK1C3	AKR1C1;AKR1C3	CM only	CM only
AKA12	AKAP12		CM only
AL9A1	ALDH9A1	CM only	CM only
ALBU	ALB	Shared	Shared
ALDOA	ALDOA	Shared	Shared
ALDR	AKR1B1	Shared	Shared
AMPB	RNPEP	Shared	Shared
AN32A	ANP32A	Shared	Shared
AN32B	ANP32B	CM only	Shared
ANXA1	ANXA1	Shared	Shared
ANXA2	ANXA2	Shared	Shared
ANXA4	ANXA4	Shared	CM only
ANXA5	ANXA5	Shared	Shared
ANXA6	ANXA6	Shared	Shared
ANXA7	ANXA7	Shared	CC only
APOE	APOE	Shared	Shared
APT	APRT		CM only
ARF4	ARF4	Shared	Shared
ARGI1	ARG1	Shared	Shared
ARP3	ACTR3	CM only	Shared
ASSY	ASS1	Shared	CM only
AT1A1	ATP1A1		CM only
ATPB	ATP5F1B	Shared	Shared
B2MG	B2M	Shared	Shared
BASI	BSG	CM only	CM only
BGH3	TGFBI	Shared	Shared
BIEA	BLVRA	CM only	CM only
BLMH	BLMH	Shared	Shared
BLVRB	BLVRB	CC only	CC only
BMP1	BMP1	CM only	CM only
C1R	C1R	Shared	Shared
C1S	C1S	Shared	Shared
CALD1	CALD1	Shared	Shared
CALL3	CALML3		CM only
CALL5	CALML5	Shared	Shared
CALR	CALR	Shared	Shared
CALU	CALU	Shared	Shared
CAN1	CAPN1		CM only
CAP1	CAP1	Shared	Shared
CASPE	CASP14		CM only
CATA	CAT	Shared	CM only
CATB	CTSB	CM only	Shared
CATD	CTSD	Shared	Shared
CATZ	CTSZ	CM only	CM only
CAVN1	CAVIN1	Shared	Shared
CAVN2	CAVIN2	Shared
CAZA1	CAPZA1	Shared	Shared
CBPA4	CPA4		Shared
CBPZ	CPZ	Shared	CC only
CBR1	CBR1	Shared	CM only
CCD80	CCDC80	Shared	Shared
CD44	CD44	Shared	CM only
CD59	CD59	CM only	CM only
CDSN	CDSN	Shared	Shared
CFA99	CFAP99	Shared	Shared
CFAB	CFB	CM only
CFAH	CFH	Shared	Shared
CHM4A	CHMP4A	CC only	CM only
CILP1	CILP	Shared	CM only
CISY	CS		CM only
CLC11	CLEC11A	CM only	CM only
CLH1	CLTC	Shared	Shared
CLIC1	CLIC1	Shared	Shared
CLUS	CLU	Shared	Shared
CNN3	CNN3	Shared	Shared
CO1A1	COL1A1	Shared	Shared
CO1A2	COL1A2	Shared	Shared
CO3	C3	Shared	CM only
CO3A1	COL3A1	Shared	Shared
CO4A;CO4B	C4A;C4B	Shared	CM only
CO4A2	COL4A2	CM only	Shared
CO6A1	COL6A1	Shared	Shared
CO6A2	COL6A2	Shared	Shared
CO6A3	COL6A3	Shared	Shared
CO7	C7	CC only
COCA1	COL12A1	Shared	Shared
COF1	CFL1	Shared	Shared
COIA1	COL18A1	Shared
COPA	COPA	Shared	Shared
COR1B	CORO1B	Shared	Shared
COR1C	CORO1C	Shared	Shared
CPNS1	CAPNS1	Shared	Shared
CSPG2	VCAN	Shared	Shared
CSTN1	CLSTN1	CM only	CM only
CYTA	CSTA	CM only	Shared
CYTB	CSTB	Shared	CM only
CYTC	CST3	Shared	Shared
DCD	DCD	Shared	Shared
DDTL;DOPD	DDTL;DDT	CC only	Shared
DDX3X	DDX3X	CM only	Shared
DDX5	DDX5	Shared	Shared
DEF1;DEF3	DEFA1; DEFA1B	CC only	CM only
DESM	DES	Shared	Shared
DESP	DSP	Shared	Shared
DEST	DSTN	Shared	Shared
DHB4	HSD17B4		CM only
DHX9	DHX9		CM only
DNPEP	DNPEP		CM only
DPYL2	DPYSL2	Shared	Shared
DPYL3	DPYSL3	Shared	Shared
DSC1	DSC1	Shared	Shared
DSC3	DSC3		Shared
DSG1	DSG1	Shared	Shared
DYHC1	DYNC1H1	Shared	Shared
ECM1	ECM1	CM only	Shared
EF1B	EEF1B2		CM only
EF1D	EEF1D	Shared	Shared
EF1G	EEF1G	Shared	Shared
EF2	EEF2	Shared	Shared
EFNMT	METTL13		CC only
EFTU	TUFM	Shared	Shared
EIF3A	EIF3A	Shared	Shared
EMIL1	EMILIN1	Shared	Shared
ENOA	ENO1	Shared	Shared
ENPL	HSP90B1	Shared	Shared
EPCR	PROCR	CM only	Shared
EPIPL	EPPK1	Shared	Shared
ERP29	ERP29		CM only
EZRI	EZR	Shared	Shared
F10A1	ST13	CC only	CM only
FABP5	FABP5	Shared	Shared
FAS	FASN	Shared	Shared
FBLN1	FBLN1	Shared	Shared
FBLN2	FBLN2	Shared	Shared
FBLN3	EFEMP1	Shared	Shared
FBLN5	FBLN5	Shared	Shared
FBN1	FBN1	Shared	Shared
FHL2	FHL2	Shared	Shared
FILA	FLG	CM only	Shared
FILA2	FLG2	Shared	Shared
FINC	FN1	Shared	Shared
FKB10	FKBP10	Shared	Shared
FLNA	FLNA	Shared	Shared
FLNB	FLNB	Shared	Shared
FLNC	FLNC	Shared	Shared
FMOD	FMOD	Shared	Shared
FRIH	FTH1	Shared	Shared
FRIL	FTL	Shared	Shared
FSCN1	FSCN1	Shared	Shared
FSTL1	FSTL1	Shared	Shared
FUBP2	KHSRP	Shared	Shared
G3P	GAPDH	Shared	Shared
G6PD	G6PD	Shared	Shared
G6PI	GPI	Shared	Shared
GANAB	GANAB	Shared	Shared
GBA1	GBA1		CM only
GDF15	GDF15	Shared	Shared
GDIB	GDI2	Shared	Shared
GDIR1	ARHGDIA	Shared	Shared
GDN	SERPINE2	Shared	Shared
GELS	GSN	Shared	Shared
GLGB	GBE1	Shared	Shared
GLRX1	GLRX	CM only	CM only
GLU2B	PRKCSH	Shared	Shared
GPC1	GPC1	Shared	Shared
GRN	GRN	Shared	Shared
GRP75	HSPA9	Shared	Shared
GSTM3	GSTM3	Shared	Shared
GSTO1	GSTO1	Shared	Shared
GSTP1	GSTP1	Shared	Shared
H37	HIST2H3PS2	Shared	Shared
HARS1	HARS1	Shared
HBA	HBA1; HBA2	CC only
HBB	HBB	Shared	Shared
HDGF	HDGF	CM only
HEBP1	HEBP1	CM only
HLAA	HLA-A	Shared	Shared
HLAC	HLA-C	Shared	CM only
HNRH2	HNRNPH2	Shared	Shared
HNRH3	HNRNPH3	CM only	CM only
HNRPC	HNRNPC	Shared	Shared
HNRPM	HNRNPM	CM only	CM only
HNRPR	HNRNPR	Shared	CM only
HNRPU	HNRNPU	Shared
HORN	HRNR	Shared	Shared
HS71A;HS71B	HSPA1A;HSPA1B	Shared	Shared
HS90A	HSP90AA1	Shared	Shared
HSP74	HSPA4	CM only	Shared
HSPB1	HSPB1	Shared	Shared
HSPB6	HSPB6	CM only	CC only
HTRA1	HTRA1	Shared	Shared
HXK1	HK1	CM only	CM only
IBP1	IGFBP1	Shared	Shared
IBP2	IGFBP2	Shared	Shared
IBP3	IGFBP3	Shared	Shared
IBP4	IGFBP4	Shared	Shared
IBP5	IGFBP5	Shared	Shared
IBP6	IGFBP6	Shared	Shared
IBP7	IGFBP7	Shared	Shared
IC1	SERPING1	Shared	Shared
IDHC	IDH1	Shared	Shared
IF2A	EIF2S1	Shared	CM only
IF6	EIF6	Shared	Shared
INO1	ISYNA1	CM only
IPYR	PPA1		CM only
IQGA1	IQGAP1	Shared	Shared
ISLR	ISLR	Shared	Shared
ITIH2	ITIH2	Shared	Shared
K1C13	KRT13	Shared	Shared
K1C14	KRT14	Shared	Shared
K1C16	KRT16	Shared	Shared
K1C17	KRT17	Shared	Shared
K1C18	KRT18	Shared	Shared
K1C23	KRT23	CM only	Shared
K1C27	KRT27	Shared	Shared
K22O	KRT76		Shared
K2C1B	KRT77	Shared	Shared
K2C4	KRT4	Shared	Shared
K2C5	KRT5	Shared	Shared
K2C6A	KRT6A	Shared	Shared
K2C6B	KRT6B	Shared	Shared
K2C7	KRT7	Shared	Shared
K2C78	KRT78	Shared	Shared
K2C79	KRT79	Shared	Shared
K2C8	KRT8	Shared	Shared
K2C80	KRT80	CC only	CM only
KAD1	AK1	CC only	Shared
KITM	TK2	Shared	CM only
KLK7	KLK7		CM only
KPLCE	KPLCE	CC only	Shared
KPRP	KPRP	Shared	Shared
KPYM	PKM	Shared	Shared
KTN1	KTN1		CM only
LAMA4	LAMA4	Shared	Shared
LAMB1	LAMB1	Shared	Shared
LAMB2	LAMB2	Shared	Shared
LAMC1	LAMC1	Shared	Shared
LAMP1	LAMP1		CM only
LASP1	LASP1	Shared	Shared
LCN1	LCN1	Shared	Shared
LDHA	LDHA	Shared	Shared
LDHB	LDHB	Shared	Shared
LEG1	LGALS1	Shared	Shared
LEG3	LGALS3	Shared	Shared
LEG7	LGALS7; LGALS7B	CC only	CM only
LG3BP	LGALS3BP	Shared	Shared
LIMA1	LIMA1		CM only
LKHA4	LTA4H	Shared	Shared
LMNA	LMNA	Shared	Shared
LMNB2	LMNB2	Shared	Shared
LTBP2	LTBP2	Shared	Shared
LUM	LUM	Shared	Shared
LXN	LXN		Shared
LYOX	LOX	Shared	Shared
MACF1	MACF1		CM only
MAP4	MAP4	Shared	CM only
MDHC	MDH1	Shared	Shared
MFGM	MFGE8	Shared	CM only
MGP	MGP	Shared	Shared
MIF	MIF	Shared	Shared
MK01	MAPK1	CM only	CM only
MMP2	MMP2	Shared	Shared
MOES	MSN	Shared	Shared
MT2	MT2A	Shared	Shared
MVP	MVP	Shared	Shared
MXRA5	MXRA5	CM only
MYH9	MYH9	Shared	Shared
MYPT1	PPP1R12A		CM only
NACAM	NACA	Shared	Shared
NAGK	NAGK	Shared	Shared
NDUF7	NDUFAF7	Shared	Shared
NIBA2	NIBAN2	CM only	CM only
NID1	NID1	Shared	CM only
NID2	NID2	Shared	Shared
NONO	NONO	Shared	Shared
NP1L1	NAP1L1	CM only	CC only
NPM	NPM1	Shared	Shared
NRDC	NRDC		CM only
NUCB1	NUCB1	Shared	Shared
NUCL	NCL	Shared	Shared
NUDC	NUDC	CM only
PAI1	SERPINE1	Shared	Shared
PAI2	SERPINB2	CC only	Shared
PALM	PALM	Shared	CM only
PARK7	PARK7		CM only
PCOC1	PCOLCE	Shared	CM only
PDC6I	PDCD6IP	CM only	CM only
PDIA1	P4HB	Shared	Shared
PDIA3	PDIA3	Shared	Shared
PDIA4	PDIA4	Shared	Shared
PDIA6	PDIA6	Shared	Shared
PDLI3	PDLIM3	Shared	Shared
PDLI5	PDLIM5	CC only	CM only
PEDF	SERPINF1	Shared	CM only
PEPD	PEPD		CC only
PEPL	PPL	CC only	Shared
PFKAP	PFKP	Shared	CM only
PGBM	HSPG2	Shared	Shared
PGK1	PGK1	Shared	Shared
PGM1	PGM1	Shared	Shared
PGM2	PGM2	Shared	Shared
PGS2	DCN	Shared	CM only
PIP	PIP	CC only	Shared
PKP1	PKP1	CC only	Shared
PLAK	JUP	Shared	Shared
PLD3	PLD3	CC only	CM only
PLEC	PLEC	Shared	Shared
PLOD1	PLOD1	Shared	Shared
PLOD2	PLOD2	CM only	Shared
PLP2	PLP2		CM only
PLTP	PLTP	Shared	Shared
PNPH	PNP	Shared	Shared
POF1B	POF1B	CC only
POTB2;POTB3	POTEB2;POTEB3		CM only
PPIA	PPIA	Shared	Shared
PPIB	PPIB	Shared	Shared
PRDX1	PRDX1	Shared	Shared
PRDX2	PRDX2	Shared	Shared
PRDX3	PRDX3	Shared	CM only
PRDX4	PRDX4	Shared	Shared
PRDX5	PRDX5	Shared	Shared
PRDX6	PRDX6	Shared	Shared
PRIO	PRNP	CM only	CM only
PRKDC	PRKDC		CM only
PROF1	PFN1	Shared	Shared
PRS23	PRSS23	Shared	Shared
PSA	NPEPPS	Shared	Shared
PSA7	PSMA7	Shared	Shared
PSB1	PSMB1	Shared	Shared
PSB4	PSMB4	CC only	Shared
PSB5	PSMB5	Shared	Shared
PSB6	PSMB6		CM only
PSD12	PSMD12	Shared	Shared
PSME1	PSME1	CM only	Shared
PTBP1	PTBP1	CM only	CM only
PTMA	PTMA	Shared	Shared
PTX3	PTX3	Shared	Shared
PUR9	ATIC		CM only
PXDN	PXDN	Shared	Shared
QSOX1	QSOX1	Shared	Shared
RARR2	RARRES2	CM only	Shared
RCN1	RCN1	Shared	Shared
RCN3	RCN3	Shared	Shared
RECQ1	RECQL		Shared
RHG01	ARHGAP1		CM only
RINI	RNH1	Shared	Shared
RL13	RPL13	Shared	Shared
RL13A	RPL13A	Shared	Shared
RL14	RPL14	Shared	Shared
RL18	RPL18	Shared	Shared
RL27A	RPL27A		CC only
RL4	RPL4	Shared	Shared
RL6	RPL6	CM only
RL7	RPL7	Shared	Shared
RLA0	RPLP0	Shared	Shared
RLA1	RPLP1	CC only	CM only
RLA2	RPLP2	Shared	Shared
RRBP1	RRBP1	Shared	Shared
RS10	RPS10	CM only
RS21	RPS21	CC only	CM only
RS3	RPS3	Shared	Shared
RS5	RPS5	Shared	CM only
S10A6	S100A6	Shared	Shared
S10AB	S100A11	Shared	Shared
S10AG	S100A16		CM only
SAHH	AHCY	Shared	Shared
SAP	PSAP		CM only
SBSN	SBSN		CM only
SC31A	SEC31A	CM only	Shared
SCG2	SCG2	CM only
SCRN1	SCRN1	CM only	CC only
SEPT8	SEPTIN8	Shared
SEPT9	SEPTIN9	CM only
SERA	PHGDH		CM only
SERPH	SERPINH1	Shared	Shared
SFRP4	SFRP4	CM only
SIAS	NANS	CM only	CM only
SIL1	SIL1	CM only
SND1	SND1	Shared	Shared
SODE	SOD3	Shared	Shared
SPB12	SERPINB12	CC only	Shared
SPEE	SRM	CC only	Shared
SPON2	SPON2	CM only	CM only
SPR1B	SPRR1B	CM only	Shared
SPR2D	SPRR2D		CM only
SPRC	SPARC	Shared	Shared
SPTB2	SPTBN1	Shared	Shared
SPTN1	SPTAN1	Shared	Shared
SRC8	CTTN	Shared	Shared
SRPX	SRPX	CM only	Shared
SRPX2	SRPX2	CM only	Shared
SSBP	SSBP1	CM only	CM only
STC2	STC2	Shared	Shared
STIP1	STIP1	Shared	Shared
STOM	STOM	Shared	Shared
SULF2	SULF2	CM only	CM only
SYDC	DARS1	Shared	CM only
SYEP	EPRS1	Shared	Shared
SYIC	IARS1	Shared	Shared
SYNC	NARS1	CM only	Shared
SYNP2	SYNPO2		Shared
SYQ	QARS1		CM only
SYRC	RARS	CM only	CM only
SYSC	SARS1		CM only
SYVC	VARS1	CM only	CM only
TAGL	TAGLN	Shared	Shared
TAGL2	TAGLN2	Shared	Shared
TALDO	TALDO1	Shared	CM only
TBA1C	TUBA1C	Shared	Shared
TBB6	TUBB6	CM only	Shared
TBCA	TBCA	CM only	CM only
TCPA	TCP1	Shared	Shared
TCPB	CCT2	Shared	Shared
TCPD	CCT4	CM only	Shared
TCPE	CCT5	Shared	Shared
TCPG	CCT3	Shared	Shared
TCPQ	CCT8	Shared	Shared
TENA	TNC	CM only	CM only
TFG	TFG	CM only
TFR1	TFRC	Shared
TGM1	TGM1		CM only
TGM3	TGM3	CC only	Shared
THIO	TXN	Shared	Shared
THOC4	ALYREF	CM only	CM only
TIG1	RARRES1	CM only
TIMP1	TIMP1	Shared	Shared
TINAL	TINAGL1	CM only
TKT	TKT	Shared	Shared
TLN1	TLN1	Shared	Shared
TPIS	TPI1	Shared	Shared
TPM4	TPM4	Shared	Shared
TPP2	TPP2	CM only	CM only
TRFE	TF	Shared	Shared
TRFL	LTF	Shared	Shared
TRXR1	TXNRD1	Shared	Shared
TRY3	PRSS3	Shared	Shared
TSP1	THBS1	Shared	Shared
TSP2	THBS2	Shared	Shared
TWF1	TWF1		CM only
TXND5	TXNDC5	Shared	Shared
TYB4	TMSB4X	Shared	Shared
UAP1	UAP1	CM only	Shared
UBA1	UBA1	Shared	Shared
UCHL1	UCHL1	Shared	Shared
UGDH	UGDH	Shared	Shared
USO1	USO1	Shared	Shared
VASN	VASN	Shared	Shared
VAT1	VAT1	Shared	Shared
VATA	ATP6V1A	CM only
VIME	VIM	Shared	Shared
VINC	VCL	Shared	Shared
VPS35	VPS35	Shared	CM only
WDR1	WDR1	Shared	Shared
WFD12	WFDC12		CM only
XRCC5	XRCC5	CM only	Shared
XRCC6	XRCC6	Shared	Shared
ZA2G	AZGP1	CC only	Shared
ZYX	ZYX	Shared	Shared
