# Supplementary material for: Primary human ovarian interstitial cells contribute to murine follicle growth through follicle-interstitial paracrine crosstalk
Source: Research Square preprint supplement (doi:10.21203/rs.3.rs-7593401/v1), 2025-09-24
Supplement: Supplementary file 13 [file Supplementary Table 4.xlsx]

## Sheet: 4A_group-pairs
Supplementary Table 4A. Pairwise comparisons for proteomics analysis.
Abbreviations: CC, co-culture; CM, conditioned media; D0, [experimental] day 0; D7, [experimental] day 7; Pre, prepubertal; Post, postpubertal.
Group 1 (G1)	Group 2 (G2)
Post_D0	Post_D7_CC
Post_D0	Post_D7_CM
Post_D7_CC	Post_D7_CM
Pre_D0	Pre_D7_CC
Pre_D0	Pre_D7_CM
Pre_D7_CC	Pre_D7_CM
Post_D0	Pre_D0
Post_D7_CC	Pre_D7_CC
Post_D7_CM	Pre_D7_CM
D0	D7_CC
D0	D7_CM
D7_CC	D7_CM

## Sheet: 4B_DE
Supplementary Table 4B. Pairwise differential expression between sample groups.
Abbreviations: Pre, prepubertal; Post, postpubertal.
ID	Label	Group1	Group2	log2FC	SE	Tvalue	DF	pvalue	adj.pvalue	issue	MissingPercentage	ImputationPercentage	Protein	UniprotID	Potential_contaminant	ProtName	Gene symbol(s)
1411	Pre_D0_vs_Post_D0	Pre_D0	Post_D0	-2.13844	0.512572	-4.17198	4	0.0140088	0.993021	NA	0	0	COIA1_HUMAN	P39060	FALSE	COIA1	COL18A1
1408	Pre_D7_CC_vs_Pre_D0	Pre_D7_CC	Pre_D0	1.76338	0.512572	3.44026	4	0.0262874	0.327191	NA	0	0	COIA1_HUMAN	P39060	FALSE	COIA1	COL18A1
1409	Pre_D7_CM_vs_Pre_D0	Pre_D7_CM	Pre_D0	1.81335	0.512572	3.53775	4	0.0240621	0.689708	NA	0	0	COIA1_HUMAN	P39060	FALSE	COIA1	COL18A1
1270	D7_CC_vs_D0	D7_CC	D0	-2.10156	0.888582	-2.36507	16	0.0309969	0.280219	NA	0	0	CO1A2_HUMAN	P08123	FALSE	CO1A2	COL1A2
1261	Post_D7_CC_vs_Post_D0	Post_D7_CC	Post_D0	-1.36954	0.628323	-2.17968	16	0.0445657	0.657436	NA	0	0	CO1A2_HUMAN	P08123	FALSE	CO1A2	COL1A2
1332	D7_CM_vs_D7_CC	D7_CM	D7_CC	2.13244	0.877822	2.42923	16	0.0272821	0.331738	NA	0	0	CO6A1_HUMAN	P12109	FALSE	CO6A1	COL6A1
1333	Post_D7_CC_vs_Post_D0	Post_D7_CC	Post_D0	-1.00235	0.434794	-2.30534	15	0.0358523	0.657436	NA	0	0	CO6A2_HUMAN	P12110	FALSE	CO6A2	COL6A2
1428	D7_CM_vs_D7_CC	D7_CM	D7_CC	1.68471	0.736676	2.28691	12	0.0411605	0.408799	NA	0	0	COPA_HUMAN	P53621	FALSE	COPA	COPA
2278	D7_CC_vs_D0	D7_CC	D0	-1.69063	0.779693	-2.16833	16	0.0455541	0.324853	NA	0	0	FINC_HUMAN	P02751	FALSE	FINC	FN1
4042	D7_CC_vs_D0	D7_CC	D0	-1.23199	0.432336	-2.84961	16	0.0115904	0.176496	NA	0	0	MIF_HUMAN	P14174	FALSE	MIF	MIF
4044	D7_CM_vs_D7_CC	D7_CM	D7_CC	1.22382	0.432336	2.83072	16	0.012052	0.277992	NA	0	0	MIF_HUMAN	P14174	FALSE	MIF	MIF
4033	Post_D7_CC_vs_Post_D0	Post_D7_CC	Post_D0	-1.14007	0.305708	-3.72929	16	0.00182588	0.408637	NA	0	0	MIF_HUMAN	P14174	FALSE	MIF	MIF
4035	Post_D7_CM_vs_Post_D7_CC	Post_D7_CM	Post_D7_CC	1.09407	0.305708	3.57881	16	0.00250907	0.543064	NA	0	0	MIF_HUMAN	P14174	FALSE	MIF	MIF
6466	D7_CC_vs_D0	D7_CC	D0	-6.94182	0.151011	-45.9689	3	2.2664e-05	0.00985891	NA	0	0	THOC4_HUMAN	Q86V81	FALSE	THOC4	ALYREF
4666	D7_CC_vs_D0	D7_CC	D0	-4.75021	1.57669	-3.01277	6	0.0236161	0.250561	NA	0	0	PFKAP_HUMAN	Q01813	FALSE	PFKAP	PFKP
1018	D7_CC_vs_D0	D7_CC	D0	-4.1601	1.58325	-2.62757	7	0.0340326	0.280219	NA	0	0	CBR1_HUMAN	P16152	FALSE	CBR1	CBR1
2686	D7_CC_vs_D0	D7_CC	D0	-3.01184	0.985726	-3.05546	14	0.00855662	0.176496	NA	0	0	H37_HUMAN	Q5TEC6	FALSE	H37	H3-7
658	D7_CC_vs_D0	D7_CC	D0	-2.90709	0.735248	-3.95389	15	0.00127339	0.110784	NA	0	0	B2MG_HUMAN;cRAP-B2MG_HUMAN	P61769;cRAP-P61769	FALSE	B2MG	B2M
3178	D7_CC_vs_D0	D7_CC	D0	-2.58513	1.15408	-2.23999	0	NA	NA	NA	0	0	ISG15_HUMAN	P05161	FALSE	ISG15	ISG15
3670	D7_CC_vs_D0	D7_CC	D0	-2.47454	1.04203	-2.37472	13	0.0336383	0.280219	NA	0	0	LAMB2_HUMAN	P55268	FALSE	LAMB2	LAMB2
766	D7_CC_vs_D0	D7_CC	D0	-2.3032	0.857398	-2.68626	14	0.017727	0.212663	NA	0	0	C1S_HUMAN	P09871	FALSE	C1S	C1S
2722	D7_CC_vs_D0	D7_CC	D0	-2.28509	0.677486	-3.37289	16	0.00387563	0.151376	NA	0	0	HBB_HUMAN;cRAP-HBB_HUMAN	P68871;cRAP-P68871	FALSE	HBB	HBB
2770	D7_CC_vs_D0	D7_CC	D0	-2.26939	0.628801	-3.60908	8	0.00689089	0.16653	NA	0	0	HLAC_HUMAN	P10321	FALSE	HLAC	HLA-C
2146	D7_CC_vs_D0	D7_CC	D0	-2.22326	0.687006	-3.23616	16	0.00516932	0.151376	NA	0	0	FBLN1_HUMAN	P23142	FALSE	FBLN1	FBLN1
2974	D7_CC_vs_D0	D7_CC	D0	-2.14715	0.600412	-3.57613	16	0.00252328	0.137203	NA	0	0	IBP3_HUMAN	P17936	FALSE	IBP3	IGFBP3
1306	D7_CC_vs_D0	D7_CC	D0	-2.05529	0.631187	-3.25623	8	0.0115924	0.176496	NA	0	0	CO4A_HUMAN;CO4B_HUMAN	P0C0L4;P0C0L5	FALSE	CO4A	C4A
2338	D7_CC_vs_D0	D7_CC	D0	-1.97661	0.739631	-2.67243	15	0.0173934	0.212663	NA	0	0	FMOD_HUMAN	Q06828	FALSE	FMOD	FMOD
4630	D7_CC_vs_D0	D7_CC	D0	-1.96024	0.702376	-2.79086	7	0.026875	0.265696	NA	0	0	PEDF_HUMAN	P36955	FALSE	PEDF	SERPINF1
2830	D7_CC_vs_D0	D7_CC	D0	-1.94736	0.530035	-3.67402	6	0.0104043	0.176496	NA	0	0	HNRPR_HUMAN	O43390	FALSE	HNRPR	HNRNPR
2794	D7_CC_vs_D0	D7_CC	D0	-1.93808	0.779869	-2.48513	6	0.0474741	0.326839	NA	0	0	HNRH3_HUMAN	P31942	FALSE	HNRH3	HNRNPH3
6802	D7_CC_vs_D0	D7_CC	D0	-1.92586	0.653108	-2.94876	12	0.0121721	0.176496	NA	0	0	UGDH_HUMAN	O60701	FALSE	UGDH	UGDH
1438	D7_CC_vs_D0	D7_CC	D0	-1.92164	0.354288	-5.42395	7	0.00098295	0.106896	NA	0	0	COR1B_HUMAN	Q9BR76	FALSE	COR1B	CORO1B
3034	D7_CC_vs_D0	D7_CC	D0	-1.83038	0.496286	-3.68816	9	0.00501165	0.151376	NA	0	0	IC1_HUMAN	P05155	FALSE	IC1	SERPING1
6982	D7_CC_vs_D0	D7_CC	D0	-1.81551	0.67309	-2.69728	13	0.0182886	0.212663	NA	0	0	XRCC6_HUMAN	P12956	FALSE	XRCC6	XRCC6
2494	D7_CC_vs_D0	D7_CC	D0	-1.81151	0.340662	-5.3176	12	0.00018301	0.0398047	NA	0	0	GDIR1_HUMAN	P52565	FALSE	GDIR1	ARHGDIA
4030	D7_CC_vs_D0	D7_CC	D0	-1.75825	0.82121	-2.14105	15	0.0491002	0.328594	NA	0	0	MGP_HUMAN	P08493	FALSE	MGP	MGP
1234	D7_CC_vs_D0	D7_CC	D0	-1.74186	0.507615	-3.43146	12	0.00497224	0.151376	NA	0	0	CLUS_HUMAN	P10909	FALSE	CLUS	CLU
4306	D7_CC_vs_D0	D7_CC	D0	-1.7256	0.608749	-2.83467	14	0.0132443	0.18004	NA	0	0	NONO_HUMAN	Q15233	FALSE	NONO	NONO
4366	D7_CC_vs_D0	D7_CC	D0	-1.68613	0.590981	-2.85311	14	0.0127715	0.179212	NA	0	0	NUCL_HUMAN	P19338	FALSE	NUCL	NCL
5230	D7_CC_vs_D0	D7_CC	D0	-1.66554	0.568168	-2.93143	0	NA	NA	NA	0	0	PUR9_HUMAN	P31939	FALSE	PUR9	ATIC
2782	D7_CC_vs_D0	D7_CC	D0	-1.59978	0.476254	-3.35909	11	0.00637416	0.163103	NA	0	0	HNRH2_HUMAN	P55795	FALSE	HNRH2	HNRNPH2
406	D7_CC_vs_D0	D7_CC	D0	-1.55806	0.653151	-2.38545	12	0.0344195	0.280219	NA	0	0	AN32A_HUMAN	P39687	FALSE	AN32A	ANP32A
454	D7_CC_vs_D0	D7_CC	D0	-1.55027	0.484505	-3.1997	4	0.0329101	0.280219	NA	0	0	ANXA4_HUMAN	P09525	FALSE	ANXA4	ANXA4
6058	D7_CC_vs_D0	D7_CC	D0	-1.54724	0.576549	-2.68362	8	0.0277699	0.268443	NA	0	0	STC2_HUMAN	O76061	FALSE	STC2	STC2
262	D7_CC_vs_D0	D7_CC	D0	-1.5132	0.491643	-3.07785	10	0.0116834	0.176496	NA	0	0	AEBP1_HUMAN	Q8IUX7	FALSE	AEBP1	AEBP1
4966	D7_CC_vs_D0	D7_CC	D0	-1.48838	0.347956	-4.27751	6	0.00521986	0.151376	NA	0	0	PRDX3_HUMAN	P30048	FALSE	PRDX3	PRDX3
2398	D7_CC_vs_D0	D7_CC	D0	-1.46659	0.44115	-3.32448	15	0.004621	0.151376	NA	0	0	FUBP2_HUMAN	Q92945	FALSE	FUBP2	KHSRP
6610	D7_CC_vs_D0	D7_CC	D0	-1.43275	0.469135	-3.05402	16	0.00757477	0.173422	NA	0	0	TRFL_HUMAN;cRAP-TRFL_HUMAN	P02788;cRAP-P02788	FALSE	TRFL	LTF
5206	D7_CC_vs_D0	D7_CC	D0	-1.4063	0.428686	-3.28049	16	0.00470888	0.151376	NA	0	0	PTMA_HUMAN	P06454	FALSE	PTMA	PTMA
2506	D7_CC_vs_D0	D7_CC	D0	-1.39031	0.58212	-2.38835	15	0.0305112	0.280219	NA	0	0	GDN_HUMAN	P07093	FALSE	GDN	SERPINE2
2026	D7_CC_vs_D0	D7_CC	D0	-1.38401	0.636971	-2.1728	14	0.0474553	0.326839	NA	0	0	EMIL1_HUMAN	Q9Y6C2	FALSE	EMIL1	EMILIN1
3790	D7_CC_vs_D0	D7_CC	D0	-1.36171	0.567584	-2.39913	16	0.0289692	0.273948	NA	0	0	LG3BP_HUMAN	Q08380	FALSE	LG3BP	LGALS3BP
1726	D7_CC_vs_D0	D7_CC	D0	-1.3268	0.341802	-3.88179	12	0.0021808	0.135521	NA	0	0	DDX5_HUMAN	P17844	FALSE	DDX5	DDX5
6874	D7_CC_vs_D0	D7_CC	D0	-1.32086	0.504181	-2.61981	16	0.0185775	0.212663	NA	0	0	VAT1_HUMAN	Q99536	FALSE	VAT1	VAT1
2758	D7_CC_vs_D0	D7_CC	D0	-1.31282	0.596745	-2.19996	15	0.0438987	0.32366	NA	0	0	HLAA_HUMAN	P04439	FALSE	HLAA	HLA-A
5290	D7_CC_vs_D0	D7_CC	D0	-1.29159	0.47604	-2.71319	8	0.026527	0.265696	NA	0	0	RARR2_HUMAN	Q99969	FALSE	RARR2	RARRES2
5470	D7_CC_vs_D0	D7_CC	D0	-1.25557	0.414421	-3.0297	12	0.0104725	0.176496	NA	0	0	RLA0_HUMAN	P05388	FALSE	RLA0	RPLP0
682	D7_CC_vs_D0	D7_CC	D0	-1.24331	0.165189	-7.52656	0	NA	NA	NA	0	0	BGAL_HUMAN	P16278	FALSE	BGAL	GLB1
4702	D7_CC_vs_D0	D7_CC	D0	-1.18387	0.522353	-2.26642	15	0.0386486	0.300217	NA	0	0	PGM1_HUMAN	P36871	FALSE	PGM1	PGM1
6754	D7_CC_vs_D0	D7_CC	D0	-1.16969	0.408408	-2.86402	16	0.0112497	0.176496	NA	0	0	UBA1_HUMAN	P22314	FALSE	UBA1	UBA1
2434	D7_CC_vs_D0	D7_CC	D0	-1.12818	0.240776	-4.6856	14	0.00035061	0.0508386	NA	0	0	G6PI_HUMAN	P06744	FALSE	G6PI	GPI
2518	D7_CC_vs_D0	D7_CC	D0	-1.04855	0.380979	-2.75225	15	0.0148191	0.195343	NA	0	0	GELS_HUMAN;cRAP-GELS_HUMAN	P06396;cRAP-P06396	FALSE	GELS	GSN
3838	D7_CC_vs_D0	D7_CC	D0	-1.04175	0.413369	-2.52015	16	0.0227326	0.247217	NA	0	0	LMNA_HUMAN	P02545	FALSE	LMNA	LMNA
2998	D7_CC_vs_D0	D7_CC	D0	-1.03714	0.366947	-2.82639	16	0.0121605	0.176496	NA	0	0	IBP5_HUMAN	P24593	FALSE	IBP5	IGFBP5
2374	D7_CC_vs_D0	D7_CC	D0	-1.01395	0.267109	-3.79603	15	0.00175742	0.127413	NA	0	0	FSCN1_HUMAN	Q16658	FALSE	FSCN1	FSCN1
2542	D7_CC_vs_D0	D7_CC	D0	-1.0132	0.439331	-2.30622	10	0.0437882	0.32366	NA	0	0	GLGB_HUMAN	Q04446	FALSE	GLGB	GBE1
5794	D7_CC_vs_D0	D7_CC	D0	-0.974461	0.455305	-2.14024	16	0.0480867	0.326839	NA	0	0	SERPH_HUMAN	P50454	FALSE	SERPH	SERPINH1
4282	D7_CC_vs_D0	D7_CC	D0	-0.964498	0.412621	-2.33749	10	0.0415168	0.316838	NA	0	0	NID2_HUMAN	Q14112	FALSE	NID2	NID2
3706	D7_CC_vs_D0	D7_CC	D0	-0.902124	0.346905	-2.6005	16	0.0193214	0.215507	NA	0	0	LASP1_HUMAN	Q14847	FALSE	LASP1	LASP1
394	D7_CC_vs_D0	D7_CC	D0	-0.898025	0.367883	-2.44106	10	0.0347858	0.280219	NA	0	0	AMPB_HUMAN	Q9H4A4	FALSE	AMPB	RNPEP
6706	D7_CC_vs_D0	D7_CC	D0	-0.82153	0.256953	-3.1972	16	0.00561063	0.152539	NA	0	0	TXND5_HUMAN	Q8NBS9	FALSE	TXND5	TXNDC5
4078	D7_CC_vs_D0	D7_CC	D0	-0.815163	0.286075	-2.84947	16	0.0115936	0.176496	NA	0	0	MOES_HUMAN	P26038	FALSE	MOES	MSN
2482	D7_CC_vs_D0	D7_CC	D0	-0.771863	0.27024	-2.85621	15	0.0120145	0.176496	NA	0	0	GDIB_HUMAN	P50395	FALSE	GDIB	GDI2
1774	D7_CC_vs_D0	D7_CC	D0	-0.733089	0.300354	-2.44075	16	0.0266614	0.265696	NA	0	0	DEST_HUMAN	P60981	FALSE	DEST	DSTN
4534	D7_CC_vs_D0	D7_CC	D0	-0.699449	0.309175	-2.26231	16	0.0379497	0.300147	NA	0	0	PDIA3_HUMAN	P30101	FALSE	PDIA3	PDIA3
742	D7_CC_vs_D0	D7_CC	D0	-0.527802	0.663548	-0.795424	0	NA	NA	NA	0	0	BMP1_HUMAN	P13497	FALSE	BMP1	BMP1
154	D7_CC_vs_D0	D7_CC	D0	-0.387425	1.30835	-0.296118	0	NA	NA	NA	0	0	ACPH_HUMAN	P13798	FALSE	ACPH	APEH
4126	D7_CC_vs_D0	D7_CC	D0	-0.262048	0.762226	-0.343793	0	NA	NA	NA	0	0	MXRA5_HUMAN	Q9NR99	FALSE	MXRA5	MXRA5
5710	D7_CC_vs_D0	D7_CC	D0	0.0775539	1.68323	0.0460745	0	NA	NA	NA	0	0	SBSN_HUMAN	Q6UWP8	FALSE	SBSN	SBSN
5338	D7_CC_vs_D0	D7_CC	D0	0.275132	1.63807	0.167961	0	NA	NA	NA	0	0	RHG01_HUMAN	Q07960	FALSE	RHG01	ARHGAP1
3250	D7_CC_vs_D0	D7_CC	D0	1.96424	0.725527	2.70733	16	0.0155369	0.198781	NA	0	0	K1C13_HUMAN	P13646	FALSE	K1C13	KRT13
5602	D7_CC_vs_D0	D7_CC	D0	3.18141	3.26242	0.975166	0	NA	NA	NA	0	0	S10A7_HUMAN	P31151	FALSE	S10A7	S100A7
22	D7_CC_vs_D0	D7_CC	D0	(-Inf)	NA	NA	NA	0	0	oneConditionMissing	0.342466	0	1433F_HUMAN	Q04917	FALSE	1433F	YWHAH
226	D7_CC_vs_D0	D7_CC	D0	(-Inf)	NA	NA	NA	0	0	oneConditionMissing	0.4	0	ADML_HUMAN	P35318	FALSE	ADML	ADM
238	D7_CC_vs_D0	D7_CC	D0	(-Inf)	NA	NA	NA	0	0	oneConditionMissing	0.675676	0	ADRM1_HUMAN	Q16186	FALSE	ADRM1	ADRM1
322	D7_CC_vs_D0	D7_CC	D0	(-Inf)	NA	NA	NA	0	0	oneConditionMissing	0.408163	0	AK1C1_HUMAN;AK1C3_HUMAN	P42330;Q04828	FALSE	AK1C1	AKR1C1
334	D7_CC_vs_D0	D7_CC	D0	(-Inf)	NA	NA	NA	0	0	oneConditionMissing	0.38	0	AKA12_HUMAN	Q02952	FALSE	AKA12	AKAP12
562	D7_CC_vs_D0	D7_CC	D0	(-Inf)	NA	NA	NA	0	0	oneConditionMissing	0.437956	0	APT_HUMAN	P07741	FALSE	APT	APRT
634	D7_CC_vs_D0	D7_CC	D0	(-Inf)	NA	NA	NA	0	0	oneConditionMissing	0.388889	0	AT1A1_HUMAN	P05023	FALSE	AT1A1	ATP1A1
1042	D7_CC_vs_D0	D7_CC	D0	(-Inf)	NA	NA	NA	0	0	oneConditionMissing	0.357143	0	CD248_HUMAN	Q9HCU0	FALSE	CD248	CD248
1678	D7_CC_vs_D0	D7_CC	D0	(-Inf)	NA	NA	NA	0	0	oneConditionMissing	0.294118	0	DCTN2_HUMAN	Q13561	FALSE	DCTN2	DCTN2
1786	D7_CC_vs_D0	D7_CC	D0	(-Inf)	NA	NA	NA	0	0	oneConditionMissing	0.652174	0	DHB4_HUMAN	P51659	FALSE	DHB4	HSD17B4
1798	D7_CC_vs_D0	D7_CC	D0	(-Inf)	NA	NA	NA	0	0	oneConditionMissing	0.401606	0	DHX9_HUMAN	Q08211	FALSE	DHX9	DHX9
1810	D7_CC_vs_D0	D7_CC	D0	(-Inf)	NA	NA	NA	0	0	oneConditionMissing	0.45	0	DNPEP_HUMAN	Q9ULA0	FALSE	DNPEP	DNPEP
2242	D7_CC_vs_D0	D7_CC	D0	(-Inf)	NA	NA	NA	0	0	oneConditionMissing	0.388889	0	FHL3_HUMAN	Q13643	FALSE	FHL3	FHL3
2710	D7_CC_vs_D0	D7_CC	D0	(-Inf)	NA	NA	NA	0	0	oneConditionMissing	0.320197	0	HBA_HUMAN;cRAP-HBA_HUMAN	P69905;cRAP-P69905	FALSE	HBA	HBA1; HBA2
2734	D7_CC_vs_D0	D7_CC	D0	(-Inf)	NA	NA	NA	0	0	oneConditionMissing	0.581395	0	HDGF_HUMAN	P51858	FALSE	HDGF	HDGF
2938	D7_CC_vs_D0	D7_CC	D0	(-Inf)	NA	NA	NA	0	0	oneConditionMissing	0.400763	0	HXK1_HUMAN	P19367	FALSE	HXK1	HK1
3046	D7_CC_vs_D0	D7_CC	D0	(-Inf)	NA	NA	NA	0	0	oneConditionMissing	0.364238	0	ICAM1_HUMAN	P05362	FALSE	ICAM1	ICAM1
3226	D7_CC_vs_D0	D7_CC	D0	(-Inf)	NA	NA	NA	0	0	oneConditionMissing	0.6	0	JUPI1_HUMAN	Q9UK76	FALSE	JUPI1	JPT1
3634	D7_CC_vs_D0	D7_CC	D0	(-Inf)	NA	NA	NA	0	0	oneConditionMissing	0.368852	0	KTN1_HUMAN	Q86UP2	FALSE	KTN1	KTN1
3814	D7_CC_vs_D0	D7_CC	D0	(-Inf)	NA	NA	NA	0	0	oneConditionMissing	0.666667	0	LIMA1_HUMAN	Q9UHB6	FALSE	LIMA1	LIMA1
3850	D7_CC_vs_D0	D7_CC	D0	(-Inf)	NA	NA	NA	0	0	oneConditionMissing	0.526316	0	LMNB1_HUMAN	P20700	FALSE	LMNB1	LMNB1
3958	D7_CC_vs_D0	D7_CC	D0	(-Inf)	NA	NA	NA	0	0	oneConditionMissing	0.3	0	LYPA1_HUMAN	O75608	FALSE	LYPA1	LYPLA1
3982	D7_CC_vs_D0	D7_CC	D0	(-Inf)	NA	NA	NA	0	0	oneConditionMissing	0.347222	0	MACF1_HUMAN	Q9UPN3	FALSE	MACF1	MACF1
4054	D7_CC_vs_D0	D7_CC	D0	(-Inf)	NA	NA	NA	0	0	oneConditionMissing	0.335968	0	MK01_HUMAN	P28482	FALSE	MK01	MAPK1
4186	D7_CC_vs_D0	D7_CC	D0	(-Inf)	NA	NA	NA	0	0	oneConditionMissing	0.306122	0	MYPT1_HUMAN	O14974	FALSE	MYPT1	PPP1R12A
4222	D7_CC_vs_D0	D7_CC	D0	(-Inf)	NA	NA	NA	0	0	oneConditionMissing	0.56	0	NDRG1_HUMAN	Q92597	FALSE	NDRG1	NDRG1
4294	D7_CC_vs_D0	D7_CC	D0	(-Inf)	NA	NA	NA	0	0	oneConditionMissing	0.344828	0	NNMT_HUMAN	P40261	FALSE	NNMT	NNMT
4342	D7_CC_vs_D0	D7_CC	D0	(-Inf)	NA	NA	NA	0	0	oneConditionMissing	0.492958	0	NRDC_HUMAN	O43847	FALSE	NRDC	NRDC
4402	D7_CC_vs_D0	D7_CC	D0	(-Inf)	NA	NA	NA	0	0	oneConditionMissing	0.288462	0	P4HA1_HUMAN	P13674	FALSE	P4HA1	P4HA1
4414	D7_CC_vs_D0	D7_CC	D0	(-Inf)	NA	NA	NA	0	0	oneConditionMissing	0.529801	0	P4HA2_HUMAN	O15460	FALSE	P4HA2	P4HA2
4426	D7_CC_vs_D0	D7_CC	D0	(-Inf)	NA	NA	NA	0	0	oneConditionMissing	0.373134	0	PA2GA_HUMAN	P14555	FALSE	PA2GA	PLA2G2A
4510	D7_CC_vs_D0	D7_CC	D0	(-Inf)	NA	NA	NA	0	0	oneConditionMissing	0.336538	0	PDC6I_HUMAN	Q8WUM4	FALSE	PDC6I	PDCD6IP
4582	D7_CC_vs_D0	D7_CC	D0	(-Inf)	NA	NA	NA	0	0	oneConditionMissing	0.545455	0	PDLI4_HUMAN	P50479	FALSE	PDLI4	PDLIM4
4642	D7_CC_vs_D0	D7_CC	D0	(-Inf)	NA	NA	NA	0	0	oneConditionMissing	0.307018	0	PEPD_HUMAN	P12955	FALSE	PEPD	PEPD
4798	D7_CC_vs_D0	D7_CC	D0	(-Inf)	NA	NA	NA	0	0	oneConditionMissing	0.357143	0	PLIN3_HUMAN	O60664	FALSE	PLIN3	PLIN3
5026	D7_CC_vs_D0	D7_CC	D0	(-Inf)	NA	NA	NA	0	0	oneConditionMissing	0.598802	0	PRKDC_HUMAN	P78527	FALSE	PRKDC	PRKDC
5146	D7_CC_vs_D0	D7_CC	D0	(-Inf)	NA	NA	NA	0	0	oneConditionMissing	0.350554	0	PSB6_HUMAN	P28072	FALSE	PSB6	PSMB6
5158	D7_CC_vs_D0	D7_CC	D0	(-Inf)	NA	NA	NA	0	0	oneConditionMissing	0.545455	0	PSB8_HUMAN	P28062	FALSE	PSB8	PSMB8
5614	D7_CC_vs_D0	D7_CC	D0	(-Inf)	NA	NA	NA	0	0	oneConditionMissing	0.304878	0	S10A8_HUMAN	P05109	FALSE	S10A8	S100A8
5662	D7_CC_vs_D0	D7_CC	D0	(-Inf)	NA	NA	NA	0	0	oneConditionMissing	0.625	0	S10AG_HUMAN	Q96FQ6	FALSE	S10AG	S100A16
5698	D7_CC_vs_D0	D7_CC	D0	(-Inf)	NA	NA	NA	0	0	oneConditionMissing	0.392157	0	SARNP_HUMAN	P82979	FALSE	SARNP	SARNP
5770	D7_CC_vs_D0	D7_CC	D0	(-Inf)	NA	NA	NA	0	0	oneConditionMissing	0.319149	0	SEPT9_HUMAN	Q9UHD8	FALSE	2025-09-09	SEPTIN9
5818	D7_CC_vs_D0	D7_CC	D0	(-Inf)	NA	NA	NA	0	0	oneConditionMissing	0.373134	0	SFRP4_HUMAN	Q6FHJ7	FALSE	SFRP4	SFRP4
5830	D7_CC_vs_D0	D7_CC	D0	(-Inf)	NA	NA	NA	0	0	oneConditionMissing	0.384615	0	SIAS_HUMAN	Q9NR45	FALSE	SIAS	NANS
5842	D7_CC_vs_D0	D7_CC	D0	(-Inf)	NA	NA	NA	0	0	oneConditionMissing	0.428571	0	SIL1_HUMAN	Q9H173	FALSE	SIL1	SIL1
6190	D7_CC_vs_D0	D7_CC	D0	(-Inf)	NA	NA	NA	0	0	oneConditionMissing	0.454545	0	SYRC_HUMAN	P54136	FALSE	SYRC	RARS1
6334	D7_CC_vs_D0	D7_CC	D0	(-Inf)	NA	NA	NA	0	0	oneConditionMissing	0.350404	0	TCPD_HUMAN	P50991	FALSE	TCPD	CCT4
6394	D7_CC_vs_D0	D7_CC	D0	(-Inf)	NA	NA	NA	0	0	oneConditionMissing	0.47619	0	TENA_HUMAN	P24821	FALSE	TENA	TNC
6406	D7_CC_vs_D0	D7_CC	D0	(-Inf)	NA	NA	NA	0	0	oneConditionMissing	0.343137	0	TFG_HUMAN	Q92734	FALSE	TFG	TFG
6478	D7_CC_vs_D0	D7_CC	D0	(-Inf)	NA	NA	NA	0	0	oneConditionMissing	0.404624	0	TIG1_HUMAN	P49788	FALSE	TIG1	RARRES1
6550	D7_CC_vs_D0	D7_CC	D0	(-Inf)	NA	NA	NA	0	0	oneConditionMissing	0.532787	0	TPD54_HUMAN	O43399	FALSE	TPD54	TPD52L2
6682	D7_CC_vs_D0	D7_CC	D0	(-Inf)	NA	NA	NA	0	0	oneConditionMissing	0.416667	0	TWF1_HUMAN	Q12792	FALSE	TWF1	TWF1
1978	D7_CC_vs_D0	D7_CC	D0	Inf	NA	NA	NA	0	0	oneConditionMissing	0.330579	0	EFNMT_HUMAN	Q8N6R0	FALSE	EFNMT	METTL13
2602	D7_CC_vs_D0	D7_CC	D0	Inf	NA	NA	NA	0	0	oneConditionMissing	0.322581	0	GPX1_HUMAN	P07203	FALSE	GPX1	GPX1
3214	D7_CC_vs_D0	D7_CC	D0	Inf	NA	NA	NA	0	0	oneConditionMissing	0.33557	0	ITIH2_HUMAN	P19823	FALSE	ITIH2	ITIH2
6598	D7_CC_vs_D0	D7_CC	D0	Inf	NA	NA	NA	0	0	oneConditionMissing	0.360054	0	TRFE_HUMAN;cRAP-TRFE_HUMAN	P02787;cRAP-P02787	FALSE	TRFE	TF
5879	D7_CM_vs_D0	D7_CM	D0	-7.72328	1.63566	-4.72181	4	0.00915934	0.383838	NA	0	0	SPB12_HUMAN	Q96P63	FALSE	SPB12	SERPINB12
4187	D7_CM_vs_D0	D7_CM	D0	-3.08376	0.160174	-19.2525	1	0.0330372	0.566526	NA	0	0	MYPT1_HUMAN	O14974	FALSE	MYPT1	PPP1R12A
2183	D7_CM_vs_D0	D7_CM	D0	-2.69546	1.08251	-2.49001	7	0.041596	0.664101	NA	0	0	FBLN5_HUMAN	Q9UBX5	FALSE	FBLN5	FBLN5
1283	D7_CM_vs_D0	D7_CM	D0	-2.48035	0.862097	-2.87711	12	0.0139049	0.383838	NA	0	0	CO3_HUMAN	P01024	FALSE	CO3	C3
4631	D7_CM_vs_D0	D7_CM	D0	-2.3108	0.583737	-3.95864	7	0.0054712	0.383838	NA	0	0	PEDF_HUMAN	P36955	FALSE	PEDF	SERPINF1
2723	D7_CM_vs_D0	D7_CM	D0	-2.06571	0.677486	-3.04909	16	0.00765335	0.383838	NA	0	0	HBB_HUMAN;cRAP-HBB_HUMAN	P68871;cRAP-P68871	FALSE	HBB	HBB
227	D7_CM_vs_D0	D7_CM	D0	-1.86658	0.00283229	-659.038	0	NA	NA	NA	0	0	ADML_HUMAN	P35318	FALSE	ADML	ADM
3815	D7_CM_vs_D0	D7_CM	D0	-1.84906	0.625238	-2.95737	0	NA	NA	NA	0	0	LIMA1_HUMAN	Q9UHB6	FALSE	LIMA1	LIMA1
6227	D7_CM_vs_D0	D7_CM	D0	-1.58511	0.443707	-3.57242	16	0.00254313	0.383838	NA	0	0	TAGL_HUMAN	Q01995	FALSE	TAGL	TAGLN
263	D7_CM_vs_D0	D7_CM	D0	-1.52277	0.441962	-3.44548	10	0.00627356	0.383838	NA	0	0	AEBP1_HUMAN	Q8IUX7	FALSE	AEBP1	AEBP1
4427	D7_CM_vs_D0	D7_CM	D0	-1.49384	0.00934068	-159.929	0	NA	NA	NA	0	0	PA2GA_HUMAN	P14555	FALSE	PA2GA	PLA2G2A
3035	D7_CM_vs_D0	D7_CM	D0	-1.48624	0.459433	-3.23495	9	0.0102411	0.383838	NA	0	0	IC1_HUMAN	P05155	FALSE	IC1	SERPING1
5207	D7_CM_vs_D0	D7_CM	D0	-1.40957	0.428686	-3.28811	16	0.00463389	0.383838	NA	0	0	PTMA_HUMAN	P06454	FALSE	PTMA	PTMA
1307	D7_CM_vs_D0	D7_CM	D0	-1.32583	0.477132	-2.77876	8	0.0239705	0.504469	NA	0	0	CO4A_HUMAN;CO4B_HUMAN	P0C0L4;P0C0L5	FALSE	CO4A	C4A
6611	D7_CM_vs_D0	D7_CM	D0	-1.23101	0.469135	-2.62399	16	0.0184201	0.406119	NA	0	0	TRFL_HUMAN;cRAP-TRFL_HUMAN	P02788;cRAP-P02788	FALSE	TRFL	LTF
4463	D7_CM_vs_D0	D7_CM	D0	-1.17868	0.401154	-2.93821	6	0.026008	0.523552	NA	0	0	PALM_HUMAN	O75781	FALSE	PALM	PALM
1007	D7_CM_vs_D0	D7_CM	D0	-1.15808	0.408844	-2.83259	6	0.0298562	0.562448	NA	0	0	CBPZ_HUMAN	Q66K79	FALSE	CBPZ	CPZ
23	D7_CM_vs_D0	D7_CM	D0	-1.1433	0.004062	-281.463	0	NA	NA	NA	0	0	1433F_HUMAN	Q04917	FALSE	1433F	YWHAH
4283	D7_CM_vs_D0	D7_CM	D0	-1.08151	0.372361	-2.90446	10	0.015713	0.383838	NA	0	0	NID2_HUMAN	Q14112	FALSE	NID2	NID2
3707	D7_CM_vs_D0	D7_CM	D0	-0.990236	0.346905	-2.85449	16	0.0114739	0.383838	NA	0	0	LASP1_HUMAN	Q14847	FALSE	LASP1	LASP1
563	D7_CM_vs_D0	D7_CM	D0	-0.830863	0.00507281	-163.788	0	NA	NA	NA	0	0	APT_HUMAN	P07741	FALSE	APT	APRT
5699	D7_CM_vs_D0	D7_CM	D0	-0.826528	0.65968	-1.25292	0	NA	NA	NA	0	0	SARNP_HUMAN	P82979	FALSE	SARNP	SARNP
4727	D7_CM_vs_D0	D7_CM	D0	-0.802463	0.35183	-2.28083	11	0.0434729	0.670931	NA	0	0	PGS2_HUMAN	P07585	FALSE	PGS2	DCN
3179	D7_CM_vs_D0	D7_CM	D0	-0.790284	1.02298	-0.772529	0	NA	NA	NA	0	0	ISG15_HUMAN	P05161	FALSE	ISG15	ISG15
5339	D7_CM_vs_D0	D7_CM	D0	-0.770658	1.29099	-0.596951	0	NA	NA	NA	0	0	RHG01_HUMAN	Q07960	FALSE	RHG01	ARHGAP1
2375	D7_CM_vs_D0	D7_CM	D0	-0.738307	0.25619	-2.88187	15	0.0114062	0.383838	NA	0	0	FSCN1_HUMAN	Q16658	FALSE	FSCN1	FSCN1
5231	D7_CM_vs_D0	D7_CM	D0	-0.728127	0.42207	-1.72513	0	NA	NA	NA	0	0	PUR9_HUMAN	P31939	FALSE	PUR9	ATIC
6707	D7_CM_vs_D0	D7_CM	D0	-0.677069	0.256953	-2.63499	16	0.0180118	0.406119	NA	0	0	TXND5_HUMAN	Q8NBS9	FALSE	TXND5	TXNDC5
1811	D7_CM_vs_D0	D7_CM	D0	-0.562316	1.28327	-0.438189	0	NA	NA	NA	0	0	DNPEP_HUMAN	Q9ULA0	FALSE	DNPEP	DNPEP
4799	D7_CM_vs_D0	D7_CM	D0	-0.546794	1.23364	-0.443234	0	NA	NA	NA	0	0	PLIN3_HUMAN	O60664	FALSE	PLIN3	PLIN3
6467	D7_CM_vs_D0	D7_CM	D0	-0.449252	0.0906098	-4.95809	3	0.0157515	0.383838	NA	0	0	THOC4_HUMAN	Q86V81	FALSE	THOC4	ALYREF
743	D7_CM_vs_D0	D7_CM	D0	-0.405991	0.00150512	-269.74	0	NA	NA	NA	0	0	BMP1_HUMAN	P13497	FALSE	BMP1	BMP1
683	D7_CM_vs_D0	D7_CM	D0	-0.232922	0.160778	-1.44872	0	NA	NA	NA	0	0	BGAL_HUMAN	P16278	FALSE	BGAL	GLB1
4583	D7_CM_vs_D0	D7_CM	D0	-0.166642	2.70687	-0.0615627	0	NA	NA	NA	0	0	PDLI4_HUMAN	P50479	FALSE	PDLI4	PDLIM4
155	D7_CM_vs_D0	D7_CM	D0	-0.0188842	0.981259	-0.0192449	0	NA	NA	NA	0	0	ACPH_HUMAN	P13798	FALSE	ACPH	APEH
5615	D7_CM_vs_D0	D7_CM	D0	0.0181097	1.75173	0.0103382	0	NA	NA	NA	0	0	S10A8_HUMAN	P05109	FALSE	S10A8	S100A8
4343	D7_CM_vs_D0	D7_CM	D0	0.0454203	0.0182354	2.49078	0	NA	NA	NA	0	0	NRDC_HUMAN	O43847	FALSE	NRDC	NRDC
5663	D7_CM_vs_D0	D7_CM	D0	0.049473	1.09796	0.045059	0	NA	NA	NA	0	0	S10AG_HUMAN	Q96FQ6	FALSE	S10AG	S100A16
3047	D7_CM_vs_D0	D7_CM	D0	0.313484	3.10829	0.100854	0	NA	NA	NA	0	0	ICAM1_HUMAN	P05362	FALSE	ICAM1	ICAM1
4127	D7_CM_vs_D0	D7_CM	D0	0.712287	0.661969	1.07601	0	NA	NA	NA	0	0	MXRA5_HUMAN	Q9NR99	FALSE	MXRA5	MXRA5
4439	D7_CM_vs_D0	D7_CM	D0	0.936582	0.409558	2.28681	16	0.0361704	0.598103	NA	0	0	PAI1_HUMAN	P05121	FALSE	PAI1	SERPINE1
5927	D7_CM_vs_D0	D7_CM	D0	1.10931	0.441801	2.51087	6	0.0458491	0.677031	NA	0	0	SPON2_HUMAN	Q9BUD6	FALSE	SPON2	SPON2
6659	D7_CM_vs_D0	D7_CM	D0	1.12914	0.479346	2.35559	16	0.0315846	0.562448	NA	0	0	TSP1_HUMAN	P07996	FALSE	TSP1	THBS1
4223	D7_CM_vs_D0	D7_CM	D0	1.13142	1.80961	0.625227	0	NA	NA	NA	0	0	NDRG1_HUMAN	Q92597	FALSE	NDRG1	NDRG1
5639	D7_CM_vs_D0	D7_CM	D0	1.16572	0.426977	2.73018	15	0.0154914	0.383838	NA	0	0	S10AB_HUMAN	P31949	FALSE	S10AB	S100A11
5819	D7_CM_vs_D0	D7_CM	D0	1.47024	0.00480441	306.019	0	NA	NA	NA	0	0	SFRP4_HUMAN	Q6FHJ7	FALSE	SFRP4	SFRP4
3611	D7_CM_vs_D0	D7_CM	D0	1.51722	0.704237	2.15442	16	0.0467926	0.677031	NA	0	0	KPRP_HUMAN	Q5T749	FALSE	KPRP	KPRP
5711	D7_CM_vs_D0	D7_CM	D0	1.64909	1.59685	1.03271	0	NA	NA	NA	0	0	SBSN_HUMAN	Q6UWP8	FALSE	SBSN	SBSN
2351	D7_CM_vs_D0	D7_CM	D0	1.96424	0.505016	3.88945	13	0.00186297	0.383838	NA	0	0	FRIH_HUMAN	P02794	FALSE	FRIH	FTH1
3251	D7_CM_vs_D0	D7_CM	D0	2.00665	0.725527	2.76579	16	0.0137793	0.383838	NA	0	0	K1C13_HUMAN	P13646	FALSE	K1C13	KRT13
5219	D7_CM_vs_D0	D7_CM	D0	2.16666	0.586305	3.69544	16	0.00196115	0.383838	NA	0	0	PTX3_HUMAN	P26022	FALSE	PTX3	PTX3
4091	D7_CM_vs_D0	D7_CM	D0	2.23423	0.700668	3.18871	12	0.00779418	0.383838	NA	0	0	MT2_HUMAN	P02795	FALSE	MT2	MT2A
1919	D7_CM_vs_D0	D7_CM	D0	2.73419	1.06988	2.55561	9	0.0309091	0.562448	NA	0	0	ECM1_HUMAN	Q16610	FALSE	ECM1	ECM1
2963	D7_CM_vs_D0	D7_CM	D0	2.88146	0.888401	3.24342	15	0.00545636	0.383838	NA	0	0	IBP2_HUMAN	P18065	FALSE	IBP2	IGFBP2
5843	D7_CM_vs_D0	D7_CM	D0	3.08453	3.66029	0.8427	0	NA	NA	NA	0	0	SIL1_HUMAN	Q9H173	FALSE	SIL1	SIL1
3491	D7_CM_vs_D0	D7_CM	D0	3.37983	1.13894	2.96751	12	0.0117555	0.383838	NA	0	0	K2C79_HUMAN	Q5XKE5	FALSE	K2C79	KRT79
5603	D7_CM_vs_D0	D7_CM	D0	5.67771	4.05572	1.39993	0	NA	NA	NA	0	0	S10A7_HUMAN	P31151	FALSE	S10A7	S100A7
2243	D7_CM_vs_D0	D7_CM	D0	(-Inf)	NA	NA	NA	0	0	oneConditionMissing	0.388889	0	FHL3_HUMAN	Q13643	FALSE	FHL3	FHL3
3227	D7_CM_vs_D0	D7_CM	D0	(-Inf)	NA	NA	NA	0	0	oneConditionMissing	0.375	0	JUPI1_HUMAN	Q9UK76	FALSE	JUPI1	JPT1
3371	D7_CM_vs_D0	D7_CM	D0	(-Inf)	NA	NA	NA	0	0	oneConditionMissing	0.333333	0	K22O_HUMAN	Q01546	FALSE	K22O	KRT76
3851	D7_CM_vs_D0	D7_CM	D0	(-Inf)	NA	NA	NA	0	0	oneConditionMissing	0.3125	0	LMNB1_HUMAN	P20700	FALSE	LMNB1	LMNB1
3959	D7_CM_vs_D0	D7_CM	D0	(-Inf)	NA	NA	NA	0	0	oneConditionMissing	0.333333	0	LYPA1_HUMAN	O75608	FALSE	LYPA1	LYPLA1
4415	D7_CM_vs_D0	D7_CM	D0	(-Inf)	NA	NA	NA	0	0	oneConditionMissing	0.28169	0	P4HA2_HUMAN	O15460	FALSE	P4HA2	P4HA2
4883	D7_CM_vs_D0	D7_CM	D0	(-Inf)	NA	NA	NA	0	0	oneConditionMissing	0.316456	0	POF1B_HUMAN	Q8WVV4	FALSE	POF1B	POF1B
5159	D7_CM_vs_D0	D7_CM	D0	(-Inf)	NA	NA	NA	0	0	oneConditionMissing	0.3	0	PSB8_HUMAN	P28062	FALSE	PSB8	PSMB8
1979	D7_CM_vs_D0	D7_CM	D0	Inf	NA	NA	NA	0	0	oneConditionMissing	0.357143	0	EFNMT_HUMAN	Q8N6R0	FALSE	EFNMT	METTL13
2603	D7_CM_vs_D0	D7_CM	D0	Inf	NA	NA	NA	0	0	oneConditionMissing	0.357143	0	GPX1_HUMAN	P07203	FALSE	GPX1	GPX1
3215	D7_CM_vs_D0	D7_CM	D0	Inf	NA	NA	NA	0	0	oneConditionMissing	0.316456	0	ITIH2_HUMAN	P19823	FALSE	ITIH2	ITIH2
6599	D7_CM_vs_D0	D7_CM	D0	Inf	NA	NA	NA	0	0	oneConditionMissing	0.310304	0	TRFE_HUMAN;cRAP-TRFE_HUMAN	P02787;cRAP-P02787	FALSE	TRFE	TF
24	D7_CM_vs_D7_CC	D7_CM	D7_CC	Inf	NA	NA	NA	0	0	oneConditionMissing	0.454545	0	1433F_HUMAN	Q04917	FALSE	1433F	YWHAH
228	D7_CM_vs_D7_CC	D7_CM	D7_CC	Inf	NA	NA	NA	0	0	oneConditionMissing	0.357143	0	ADML_HUMAN	P35318	FALSE	ADML	ADM
240	D7_CM_vs_D7_CC	D7_CM	D7_CC	Inf	NA	NA	NA	0	0	oneConditionMissing	0.609756	0	ADRM1_HUMAN	Q16186	FALSE	ADRM1	ADRM1
324	D7_CM_vs_D7_CC	D7_CM	D7_CC	Inf	NA	NA	NA	0	0	oneConditionMissing	0.330579	0	AK1C1_HUMAN;AK1C3_HUMAN	P42330;Q04828	FALSE	AK1C1	AKR1C1
336	D7_CM_vs_D7_CC	D7_CM	D7_CC	Inf	NA	NA	NA	0	0	oneConditionMissing	0.463415	0	AKA12_HUMAN	Q02952	FALSE	AKA12	AKAP12
564	D7_CM_vs_D7_CC	D7_CM	D7_CC	Inf	NA	NA	NA	0	0	oneConditionMissing	0.402685	0	APT_HUMAN	P07741	FALSE	APT	APRT
636	D7_CM_vs_D7_CC	D7_CM	D7_CC	Inf	NA	NA	NA	0	0	oneConditionMissing	0.346535	0	AT1A1_HUMAN	P05023	FALSE	AT1A1	ATP1A1
1044	D7_CM_vs_D7_CC	D7_CM	D7_CC	Inf	NA	NA	NA	0	0	oneConditionMissing	0.5	0	CD248_HUMAN	Q9HCU0	FALSE	CD248	CD248
1680	D7_CM_vs_D7_CC	D7_CM	D7_CC	Inf	NA	NA	NA	0	0	oneConditionMissing	0.271318	0	DCTN2_HUMAN	Q13561	FALSE	DCTN2	DCTN2
1788	D7_CM_vs_D7_CC	D7_CM	D7_CC	Inf	NA	NA	NA	0	0	oneConditionMissing	0.412844	0	DHB4_HUMAN	P51659	FALSE	DHB4	HSD17B4
1800	D7_CM_vs_D7_CC	D7_CM	D7_CC	Inf	NA	NA	NA	0	0	oneConditionMissing	0.507614	0	DHX9_HUMAN	Q08211	FALSE	DHX9	DHX9
1812	D7_CM_vs_D7_CC	D7_CM	D7_CC	Inf	NA	NA	NA	0	0	oneConditionMissing	0.405405	0	DNPEP_HUMAN	Q9ULA0	FALSE	DNPEP	DNPEP
2712	D7_CM_vs_D7_CC	D7_CM	D7_CC	Inf	NA	NA	NA	0	0	oneConditionMissing	0.503876	0	HBA_HUMAN;cRAP-HBA_HUMAN	P69905;cRAP-P69905	FALSE	HBA	HBA1; HBA2
2736	D7_CM_vs_D7_CC	D7_CM	D7_CC	Inf	NA	NA	NA	0	0	oneConditionMissing	0.60241	0	HDGF_HUMAN	P51858	FALSE	HDGF	HDGF
2940	D7_CM_vs_D7_CC	D7_CM	D7_CC	Inf	NA	NA	NA	0	0	oneConditionMissing	0.302594	0	HXK1_HUMAN	P19367	FALSE	HXK1	HK1
3048	D7_CM_vs_D7_CC	D7_CM	D7_CC	Inf	NA	NA	NA	0	0	oneConditionMissing	0.491071	0	ICAM1_HUMAN	P05362	FALSE	ICAM1	ICAM1
3636	D7_CM_vs_D7_CC	D7_CM	D7_CC	Inf	NA	NA	NA	0	0	oneConditionMissing	0.405405	0	KTN1_HUMAN	Q86UP2	FALSE	KTN1	KTN1
3816	D7_CM_vs_D7_CC	D7_CM	D7_CC	Inf	NA	NA	NA	0	0	oneConditionMissing	0.6	0	LIMA1_HUMAN	Q9UHB6	FALSE	LIMA1	LIMA1
3984	D7_CM_vs_D7_CC	D7_CM	D7_CC	Inf	NA	NA	NA	0	0	oneConditionMissing	0.328947	0	MACF1_HUMAN	Q9UPN3	FALSE	MACF1	MACF1
4056	D7_CM_vs_D7_CC	D7_CM	D7_CC	Inf	NA	NA	NA	0	0	oneConditionMissing	0.34413	0	MK01_HUMAN	P28482	FALSE	MK01	MAPK1
4188	D7_CM_vs_D7_CC	D7_CM	D7_CC	Inf	NA	NA	NA	0	0	oneConditionMissing	0.3	0	MYPT1_HUMAN	O14974	FALSE	MYPT1	PPP1R12A
4224	D7_CM_vs_D7_CC	D7_CM	D7_CC	Inf	NA	NA	NA	0	0	oneConditionMissing	0.76087	0	NDRG1_HUMAN	Q92597	FALSE	NDRG1	NDRG1
4296	D7_CM_vs_D7_CC	D7_CM	D7_CC	Inf	NA	NA	NA	0	0	oneConditionMissing	0.491803	0	NNMT_HUMAN	P40261	FALSE	NNMT	NNMT
4344	D7_CM_vs_D7_CC	D7_CM	D7_CC	Inf	NA	NA	NA	0	0	oneConditionMissing	0.402299	0	NRDC_HUMAN	O43847	FALSE	NRDC	NRDC
4404	D7_CM_vs_D7_CC	D7_CM	D7_CC	Inf	NA	NA	NA	0	0	oneConditionMissing	0.368098	0	P4HA1_HUMAN	P13674	FALSE	P4HA1	P4HA1
4428	D7_CM_vs_D7_CC	D7_CM	D7_CC	Inf	NA	NA	NA	0	0	oneConditionMissing	0.510204	0	PA2GA_HUMAN	P14555	FALSE	PA2GA	PLA2G2A
4512	D7_CM_vs_D7_CC	D7_CM	D7_CC	Inf	NA	NA	NA	0	0	oneConditionMissing	0.327103	0	PDC6I_HUMAN	Q8WUM4	FALSE	PDC6I	PDCD6IP
4584	D7_CM_vs_D7_CC	D7_CM	D7_CC	Inf	NA	NA	NA	0	0	oneConditionMissing	0.6	0	PDLI4_HUMAN	P50479	FALSE	PDLI4	PDLIM4
4644	D7_CM_vs_D7_CC	D7_CM	D7_CC	Inf	NA	NA	NA	0	0	oneConditionMissing	0.384615	0	PEPD_HUMAN	P12955	FALSE	PEPD	PEPD
4800	D7_CM_vs_D7_CC	D7_CM	D7_CC	Inf	NA	NA	NA	0	0	oneConditionMissing	0.526316	0	PLIN3_HUMAN	O60664	FALSE	PLIN3	PLIN3
5028	D7_CM_vs_D7_CC	D7_CM	D7_CC	Inf	NA	NA	NA	0	0	oneConditionMissing	0.606061	0	PRKDC_HUMAN	P78527	FALSE	PRKDC	PRKDC
5148	D7_CM_vs_D7_CC	D7_CM	D7_CC	Inf	NA	NA	NA	0	0	oneConditionMissing	0.482233	0	PSB6_HUMAN	P28072	FALSE	PSB6	PSMB6
5616	D7_CM_vs_D7_CC	D7_CM	D7_CC	Inf	NA	NA	NA	0	0	oneConditionMissing	0.297619	0	S10A8_HUMAN	P05109	FALSE	S10A8	S100A8
5664	D7_CM_vs_D7_CC	D7_CM	D7_CC	Inf	NA	NA	NA	0	0	oneConditionMissing	0.625	0	S10AG_HUMAN	Q96FQ6	FALSE	S10AG	S100A16
5700	D7_CM_vs_D7_CC	D7_CM	D7_CC	Inf	NA	NA	NA	0	0	oneConditionMissing	0.333333	0	SARNP_HUMAN	P82979	FALSE	SARNP	SARNP
5772	D7_CM_vs_D7_CC	D7_CM	D7_CC	Inf	NA	NA	NA	0	0	oneConditionMissing	0.35503	0	SEPT9_HUMAN	Q9UHD8	FALSE	2025-09-09	SEPTIN9
5820	D7_CM_vs_D7_CC	D7_CM	D7_CC	Inf	NA	NA	NA	0	0	oneConditionMissing	0.409836	0	SFRP4_HUMAN	Q6FHJ7	FALSE	SFRP4	SFRP4
5832	D7_CM_vs_D7_CC	D7_CM	D7_CC	Inf	NA	NA	NA	0	0	oneConditionMissing	0.342466	0	SIAS_HUMAN	Q9NR45	FALSE	SIAS	NANS
5844	D7_CM_vs_D7_CC	D7_CM	D7_CC	Inf	NA	NA	NA	0	0	oneConditionMissing	0.333333	0	SIL1_HUMAN	Q9H173	FALSE	SIL1	SIL1
6192	D7_CM_vs_D7_CC	D7_CM	D7_CC	Inf	NA	NA	NA	0	0	oneConditionMissing	0.373134	0	SYRC_HUMAN	P54136	FALSE	SYRC	RARS1
6336	D7_CM_vs_D7_CC	D7_CM	D7_CC	Inf	NA	NA	NA	0	0	oneConditionMissing	0.325815	0	TCPD_HUMAN	P50991	FALSE	TCPD	CCT4
6396	D7_CM_vs_D7_CC	D7_CM	D7_CC	Inf	NA	NA	NA	0	0	oneConditionMissing	0.357143	0	TENA_HUMAN	P24821	FALSE	TENA	TNC
6408	D7_CM_vs_D7_CC	D7_CM	D7_CC	Inf	NA	NA	NA	0	0	oneConditionMissing	0.38674	0	TFG_HUMAN	Q92734	FALSE	TFG	TFG
6480	D7_CM_vs_D7_CC	D7_CM	D7_CC	Inf	NA	NA	NA	0	0	oneConditionMissing	0.4375	0	TIG1_HUMAN	P49788	FALSE	TIG1	RARRES1
6552	D7_CM_vs_D7_CC	D7_CM	D7_CC	Inf	NA	NA	NA	0	0	oneConditionMissing	0.550847	0	TPD54_HUMAN	O43399	FALSE	TPD54	TPD52L2
6684	D7_CM_vs_D7_CC	D7_CM	D7_CC	Inf	NA	NA	NA	0	0	oneConditionMissing	0.416667	0	TWF1_HUMAN	Q12792	FALSE	TWF1	TWF1
3372	D7_CM_vs_D7_CC	D7_CM	D7_CC	(-Inf)	NA	NA	NA	0	0	oneConditionMissing	0.272727	0	K22O_HUMAN	Q01546	FALSE	K22O	KRT76
4884	D7_CM_vs_D7_CC	D7_CM	D7_CC	(-Inf)	NA	NA	NA	0	0	oneConditionMissing	0.294118	0	POF1B_HUMAN	Q8WVV4	FALSE	POF1B	POF1B
6468	D7_CM_vs_D7_CC	D7_CM	D7_CC	6.49257	0.134672	48.2101	3	1.9651e-05	0.00858751	NA	0	0	THOC4_HUMAN	Q86V81	FALSE	THOC4	ALYREF
5016	D7_CM_vs_D7_CC	D7_CM	D7_CC	5.44307	0.958967	5.67597	2	0.0296656	0.331738	NA	0	0	PRIO_HUMAN	P04156	FALSE	PRIO	PRNP
4668	D7_CM_vs_D7_CC	D7_CM	D7_CC	5.07341	1.62429	3.12346	6	0.0204944	0.298536	NA	0	0	PFKAP_HUMAN	Q01813	FALSE	PFKAP	PFKP
1020	D7_CM_vs_D7_CC	D7_CM	D7_CC	4.77685	1.55506	3.07181	7	0.0180215	0.281264	NA	0	0	CBR1_HUMAN	P16152	FALSE	CBR1	CBR1
2688	D7_CM_vs_D7_CC	D7_CM	D7_CC	3.91362	1.01876	3.84156	14	0.0017972	0.261792	NA	0	0	H37_HUMAN	Q5TEC6	FALSE	H37	H3-7
5604	D7_CM_vs_D7_CC	D7_CM	D7_CC	2.49631	4.17331	0.598161	0	NA	NA	NA	0	0	S10A7_HUMAN	P31151	FALSE	S10A7	S100A7
2988	D7_CM_vs_D7_CC	D7_CM	D7_CC	2.46849	0.769061	3.20975	16	0.00546463	0.277992	NA	0	0	IBP4_HUMAN	P22692	FALSE	IBP4	IGFBP4
6492	D7_CM_vs_D7_CC	D7_CM	D7_CC	2.42661	0.835837	2.90321	16	0.0103716	0.277992	NA	0	0	TIMP1_HUMAN	P01033	FALSE	TIMP1	TIMP1
3072	D7_CM_vs_D7_CC	D7_CM	D7_CC	2.37797	0.880221	2.70157	14	0.0172038	0.281264	NA	0	0	IDHC_HUMAN	O75874	FALSE	IDHC	IDH1
2964	D7_CM_vs_D7_CC	D7_CM	D7_CC	2.2953	0.861875	2.66315	15	0.0177194	0.281264	NA	0	0	IBP2_HUMAN	P18065	FALSE	IBP2	IGFBP2
6420	D7_CM_vs_D7_CC	D7_CM	D7_CC	2.28247	0.707944	3.22409	3	0.0484332	0.418368	NA	0	0	TFR1_HUMAN	P02786	FALSE	TFR1	TFRC
5244	D7_CM_vs_D7_CC	D7_CM	D7_CC	2.23873	1.03375	2.16564	13	0.0495198	0.418368	NA	0	0	PXDN_HUMAN	Q92626	FALSE	PXDN	PXDN
660	D7_CM_vs_D7_CC	D7_CM	D7_CC	2.21269	0.735248	3.00944	15	0.00880189	0.277992	NA	0	0	B2MG_HUMAN;cRAP-B2MG_HUMAN	P61769;cRAP-P61769	FALSE	B2MG	B2M
2472	D7_CM_vs_D7_CC	D7_CM	D7_CC	2.03355	0.851775	2.38743	14	0.0316208	0.337031	NA	0	0	GDF15_HUMAN	Q99988	FALSE	GDF15	GDF15
4032	D7_CM_vs_D7_CC	D7_CM	D7_CC	1.98324	0.82121	2.41502	15	0.0289614	0.331738	NA	0	0	MGP_HUMAN	P08493	FALSE	MGP	MGP
4872	D7_CM_vs_D7_CC	D7_CM	D7_CC	1.91635	0.759233	2.52406	10	0.0301768	0.331738	NA	0	0	PNPH_HUMAN	P00491	FALSE	PNPH	PNP
5220	D7_CM_vs_D7_CC	D7_CM	D7_CC	1.90531	0.586305	3.2497	16	0.00502419	0.277992	NA	0	0	PTX3_HUMAN	P26022	FALSE	PTX3	PTX3
2976	D7_CM_vs_D7_CC	D7_CM	D7_CC	1.8642	0.600412	3.10487	16	0.00681002	0.277992	NA	0	0	IBP3_HUMAN	P17936	FALSE	IBP3	IGFBP3
4092	D7_CM_vs_D7_CC	D7_CM	D7_CC	1.84759	0.672877	2.74581	12	0.0177395	0.281264	NA	0	0	MT2_HUMAN	P02795	FALSE	MT2	MT2A
3180	D7_CM_vs_D7_CC	D7_CM	D7_CC	1.79485	1.19459	1.50248	0	NA	NA	NA	0	0	ISG15_HUMAN	P05161	FALSE	ISG15	ISG15
6060	D7_CM_vs_D7_CC	D7_CM	D7_CC	1.6862	0.576549	2.92464	8	0.0191548	0.288642	NA	0	0	STC2_HUMAN	O76061	FALSE	STC2	STC2
1224	D7_CM_vs_D7_CC	D7_CM	D7_CC	1.58166	0.604208	2.61774	13	0.0212771	0.299939	NA	0	0	CLIC1_HUMAN	O00299	FALSE	CLIC1	CLIC1
5712	D7_CM_vs_D7_CC	D7_CM	D7_CC	1.57153	1.76539	0.890193	0	NA	NA	NA	0	0	SBSN_HUMAN	Q6UWP8	FALSE	SBSN	SBSN
2148	D7_CM_vs_D7_CC	D7_CM	D7_CC	1.55635	0.687006	2.26541	16	0.0377197	0.391032	NA	0	0	FBLN1_HUMAN	P23142	FALSE	FBLN1	FBLN1
372	D7_CM_vs_D7_CC	D7_CM	D7_CC	1.52917	0.509494	3.00136	16	0.00845552	0.277992	NA	0	0	ALDOA_HUMAN	P04075	FALSE	ALDOA	ALDOA
1704	D7_CM_vs_D7_CC	D7_CM	D7_CC	1.45366	0.285287	5.09544	4	0.00700484	0.277992	NA	0	0	DDTL_HUMAN;DOPD_HUMAN	A6NHG4;P30046	FALSE	DDTL	DDTL
2952	D7_CM_vs_D7_CC	D7_CM	D7_CC	1.42341	0.55279	2.57496	13	0.0230761	0.315133	NA	0	0	IBP1_HUMAN	P08833	FALSE	IBP1	IGFBP1
2412	D7_CM_vs_D7_CC	D7_CM	D7_CC	1.42088	0.658777	2.15685	16	0.046574	0.418368	NA	0	0	G3P_HUMAN	P04406	FALSE	G3P	GAPDH
4440	D7_CM_vs_D7_CC	D7_CM	D7_CC	1.39297	0.409558	3.40117	16	0.00365117	0.277992	NA	0	0	PAI1_HUMAN	P05121	FALSE	PAI1	SERPINE1
2544	D7_CM_vs_D7_CC	D7_CM	D7_CC	1.35441	0.433156	3.12684	10	0.0107482	0.277992	NA	0	0	GLGB_HUMAN	Q04446	FALSE	GLGB	GBE1
1236	D7_CM_vs_D7_CC	D7_CM	D7_CC	1.32809	0.523516	2.53687	12	0.0260879	0.331738	NA	0	0	CLUS_HUMAN	P10909	FALSE	CLUS	CLU
6660	D7_CM_vs_D7_CC	D7_CM	D7_CC	1.30538	0.479346	2.72326	16	0.0150376	0.281264	NA	0	0	TSP1_HUMAN	P07996	FALSE	TSP1	THBS1
3732	D7_CM_vs_D7_CC	D7_CM	D7_CC	1.2896	0.431694	2.9873	16	0.0087071	0.277992	NA	0	0	LDHA_HUMAN	P00338	FALSE	LDHA	LDHA
2352	D7_CM_vs_D7_CC	D7_CM	D7_CC	1.2851	0.50448	2.54738	13	0.024313	0.321963	NA	0	0	FRIH_HUMAN	P02794	FALSE	FRIH	FTH1
6564	D7_CM_vs_D7_CC	D7_CM	D7_CC	1.27282	0.397811	3.19956	16	0.00558292	0.277992	NA	0	0	TPIS_HUMAN	P60174	FALSE	TPIS	TPI1
2784	D7_CM_vs_D7_CC	D7_CM	D7_CC	1.22878	0.522852	2.35015	11	0.0384768	0.391032	NA	0	0	HNRH2_HUMAN	P55795	FALSE	HNRH2	HNRNPH2
2496	D7_CM_vs_D7_CC	D7_CM	D7_CC	1.18717	0.340662	3.4849	12	0.00450547	0.277992	NA	0	0	GDIR1_HUMAN	P52565	FALSE	GDIR1	ARHGDIA
5472	D7_CM_vs_D7_CC	D7_CM	D7_CC	1.13531	0.406953	2.78978	12	0.0163511	0.281264	NA	0	0	RLA0_HUMAN	P05388	FALSE	RLA0	RPLP0
1968	D7_CM_vs_D7_CC	D7_CM	D7_CC	1.10412	0.503268	2.19391	16	0.0433553	0.412767	NA	0	0	EF2_HUMAN	P13639	FALSE	EF2	EEF2
1440	D7_CM_vs_D7_CC	D7_CM	D7_CC	1.06477	0.343461	3.10012	7	0.0173193	0.281264	NA	0	0	COR1B_HUMAN	Q9BR76	FALSE	COR1B	CORO1B
2040	D7_CM_vs_D7_CC	D7_CM	D7_CC	1.03954	0.437619	2.37545	16	0.030365	0.331738	NA	0	0	ENOA_HUMAN	P06733	FALSE	ENOA	ENO1
3000	D7_CM_vs_D7_CC	D7_CM	D7_CC	1.03822	0.366947	2.82934	16	0.0120866	0.277992	NA	0	0	IBP5_HUMAN	P24593	FALSE	IBP5	IGFBP5
684	D7_CM_vs_D7_CC	D7_CM	D7_CC	1.01039	0.225221	4.4862	0	NA	NA	NA	0	0	BGAL_HUMAN	P16278	FALSE	BGAL	GLB1
4128	D7_CM_vs_D7_CC	D7_CM	D7_CC	0.974335	0.531794	1.83217	0	NA	NA	NA	0	0	MXRA5_HUMAN	Q9NR99	FALSE	MXRA5	MXRA5
4812	D7_CM_vs_D7_CC	D7_CM	D7_CC	0.967579	0.440994	2.19409	15	0.0443936	0.412767	NA	0	0	PLOD1_HUMAN	Q02809	FALSE	PLOD1	PLOD1
2136	D7_CM_vs_D7_CC	D7_CM	D7_CC	0.95106	0.333867	2.84862	13	0.0136931	0.281264	NA	0	0	FAS_HUMAN	P49327	FALSE	FAS	FASN
5232	D7_CM_vs_D7_CC	D7_CM	D7_CC	0.937417	0.53912	1.73879	0	NA	NA	NA	0	0	PUR9_HUMAN	P31939	FALSE	PUR9	ATIC
2436	D7_CM_vs_D7_CC	D7_CM	D7_CC	0.933588	0.240776	3.87742	14	0.00167458	0.261792	NA	0	0	G6PI_HUMAN	P06744	FALSE	G6PI	GPI
5640	D7_CM_vs_D7_CC	D7_CM	D7_CC	0.907965	0.412369	2.20182	15	0.043743	0.412767	NA	0	0	S10AB_HUMAN	P31949	FALSE	S10AB	S100A11
4944	D7_CM_vs_D7_CC	D7_CM	D7_CC	0.889073	0.370861	2.39732	16	0.0290738	0.331738	NA	0	0	PRDX1_HUMAN;cRAP-PRDX1_HUMAN	Q06830;cRAP-Q06830	FALSE	PRDX1	PRDX1
4968	D7_CM_vs_D7_CC	D7_CM	D7_CC	0.843505	0.339631	2.48359	6	0.0475732	0.418368	NA	0	0	PRDX3_HUMAN	P30048	FALSE	PRDX3	PRDX3
2484	D7_CM_vs_D7_CC	D7_CM	D7_CC	0.78366	0.27024	2.89986	15	0.0109977	0.277992	NA	0	0	GDIB_HUMAN	P50395	FALSE	GDIB	GDI2
156	D7_CM_vs_D7_CC	D7_CM	D7_CC	0.368541	1.34861	0.273274	0	NA	NA	NA	0	0	ACPH_HUMAN	P13798	FALSE	ACPH	APEH
744	D7_CM_vs_D7_CC	D7_CM	D7_CC	0.121812	0.663548	0.183576	0	NA	NA	NA	0	0	BMP1_HUMAN	P13497	FALSE	BMP1	BMP1
1980	D7_CM_vs_D7_CC	D7_CM	D7_CC	-1.04212	0.0224289	-46.4632	1	0.0136995	0.281264	NA	0	0	EFNMT_HUMAN	Q8N6R0	FALSE	EFNMT	METTL13
5340	D7_CM_vs_D7_CC	D7_CM	D7_CC	-1.04579	1.40107	-0.746424	0	NA	NA	NA	0	0	RHG01_HUMAN	Q07960	FALSE	RHG01	ARHGAP1
5880	D7_CM_vs_D7_CC	D7_CM	D7_CC	-7.27972	1.53439	-4.74438	4	0.00900807	0.277992	NA	0	0	SPB12_HUMAN	Q96P63	FALSE	SPB12	SERPINB12
217	Post_D7_CC_vs_Post_D0	Post_D7_CC	Post_D0	(-Inf)	NA	NA	NA	0	0	oneConditionMissing	0.625	0	ADML_HUMAN	P35318	FALSE	ADML	ADM
218	Post_D7_CM_vs_Post_D0	Post_D7_CM	Post_D0	-1.29591	0.00200273	-647.069	0	NA	NA	NA	0	0	ADML_HUMAN	P35318	FALSE	ADML	ADM
229	Post_D7_CC_vs_Post_D0	Post_D7_CC	Post_D0	(-Inf)	NA	NA	NA	0	0	oneConditionMissing	0.609756	0	ADRM1_HUMAN	Q16186	FALSE	ADRM1	ADRM1
254	Post_D7_CM_vs_Post_D0	Post_D7_CM	Post_D0	-0.833662	0.313659	-2.65786	10	0.0239872	0.689988	NA	0	0	AEBP1_HUMAN	Q8IUX7	FALSE	AEBP1	AEBP1
325	Post_D7_CC_vs_Post_D0	Post_D7_CC	Post_D0	(-Inf)	NA	NA	NA	0	0	oneConditionMissing	0.698529	0	AKA12_HUMAN	Q02952	FALSE	AKA12	AKAP12
313	Post_D7_CC_vs_Post_D0	Post_D7_CC	Post_D0	(-Inf)	NA	NA	NA	0	0	oneConditionMissing	0.555556	0	AK1C1_HUMAN;AK1C3_HUMAN	P42330;Q04828	FALSE	AK1C1	AKR1C1
6457	Post_D7_CC_vs_Post_D0	Post_D7_CC	Post_D0	-0.835567	0.0909857	-9.1835	3	0.00273031	0.408637	NA	0	0	THOC4_HUMAN	Q86V81	FALSE	THOC4	ALYREF
6458	Post_D7_CM_vs_Post_D0	Post_D7_CM	Post_D0	-0.723464	0.0575781	-12.5649	3	0.00108686	0.351226	NA	0	0	THOC4_HUMAN	Q86V81	FALSE	THOC4	ALYREF
145	Post_D7_CC_vs_Post_D0	Post_D7_CC	Post_D0	0.559077	0.92514	0.604316	0	NA	NA	NA	0	0	ACPH_HUMAN	P13798	FALSE	ACPH	APEH
146	Post_D7_CM_vs_Post_D0	Post_D7_CM	Post_D0	0.00553633	0.731387	0.00756962	0	NA	NA	NA	0	0	ACPH_HUMAN	P13798	FALSE	ACPH	APEH
517	Post_D7_CC_vs_Post_D0	Post_D7_CC	Post_D0	-0.856774	0.373723	-2.29254	15	0.03675	0.657436	NA	0	0	APOE_HUMAN	P02649	FALSE	APOE	APOE
553	Post_D7_CC_vs_Post_D0	Post_D7_CC	Post_D0	(-Inf)	NA	NA	NA	0	0	oneConditionMissing	0.681818	0	APT_HUMAN	P07741	FALSE	APT	APRT
554	Post_D7_CM_vs_Post_D0	Post_D7_CM	Post_D0	-0.0520693	0.00358702	-14.516	0	NA	NA	NA	0	0	APT_HUMAN	P07741	FALSE	APT	APRT
5329	Post_D7_CC_vs_Post_D0	Post_D7_CC	Post_D0	0.841078	1.05189	0.799591	0	NA	NA	NA	0	0	RHG01_HUMAN	Q07960	FALSE	RHG01	ARHGAP1
5330	Post_D7_CM_vs_Post_D0	Post_D7_CM	Post_D0	-0.711281	0.880394	-0.807912	0	NA	NA	NA	0	0	RHG01_HUMAN	Q07960	FALSE	RHG01	ARHGAP1
2485	Post_D7_CC_vs_Post_D0	Post_D7_CC	Post_D0	-0.611048	0.245037	-2.4937	12	0.0282397	0.657436	NA	0	0	GDIR1_HUMAN	P52565	FALSE	GDIR1	ARHGDIA
5221	Post_D7_CC_vs_Post_D0	Post_D7_CC	Post_D0	-0.518051	0.398105	-1.30129	0	NA	NA	NA	0	0	PUR9_HUMAN	P31939	FALSE	PUR9	ATIC
5222	Post_D7_CM_vs_Post_D0	Post_D7_CM	Post_D0	-0.597729	0.286439	-2.08676	0	NA	NA	NA	0	0	PUR9_HUMAN	P31939	FALSE	PUR9	ATIC
649	Post_D7_CC_vs_Post_D0	Post_D7_CC	Post_D0	-1.25951	0.534972	-2.35435	15	0.032601	0.657436	NA	0	0	B2MG_HUMAN;cRAP-B2MG_HUMAN	P61769;cRAP-P61769	FALSE	B2MG	B2M
710	Post_D7_CM_vs_Post_D0	Post_D7_CM	Post_D0	1.45961	0.596807	2.44571	9	0.0370165	0.689988	NA	0	0	BLMH_HUMAN	Q13867	FALSE	BLMH	BLMH
733	Post_D7_CC_vs_Post_D0	Post_D7_CC	Post_D0	-0.401966	0.663547	-0.605784	0	NA	NA	NA	0	0	BMP1_HUMAN	P13497	FALSE	BMP1	BMP1
734	Post_D7_CM_vs_Post_D0	Post_D7_CM	Post_D0	-0.757257	0.00106428	-711.521	0	NA	NA	NA	0	0	BMP1_HUMAN	P13497	FALSE	BMP1	BMP1
757	Post_D7_CC_vs_Post_D0	Post_D7_CC	Post_D0	-2.24961	0.606272	-3.71056	14	0.00232812	0.408637	NA	0	0	C1S_HUMAN	P09871	FALSE	C1S	C1S
1274	Post_D7_CM_vs_Post_D0	Post_D7_CM	Post_D0	-1.67894	0.609595	-2.75419	12	0.0174663	0.581378	NA	0	0	CO3_HUMAN	P01024	FALSE	CO3	C3
1297	Post_D7_CC_vs_Post_D0	Post_D7_CC	Post_D0	-1.31691	0.53345	-2.46867	8	0.0387907	0.657436	NA	0	0	CO4A_HUMAN;CO4B_HUMAN	P0C0L4;P0C0L5	FALSE	CO4A	C4A
1298	Post_D7_CM_vs_Post_D0	Post_D7_CM	Post_D0	-1.01567	0.337383	-3.01042	8	0.0168027	0.581378	NA	0	0	CO4A_HUMAN;CO4B_HUMAN	P0C0L4;P0C0L5	FALSE	CO4A	C4A
1009	Post_D7_CC_vs_Post_D0	Post_D7_CC	Post_D0	-3.45975	1.15198	-3.0033	7	0.0198494	0.657436	NA	0	0	CBR1_HUMAN	P16152	FALSE	CBR1	CBR1
1033	Post_D7_CC_vs_Post_D0	Post_D7_CC	Post_D0	(-Inf)	NA	NA	NA	0	0	oneConditionMissing	0.714286	0	CD248_HUMAN	Q9HCU0	FALSE	CD248	CD248
1225	Post_D7_CC_vs_Post_D0	Post_D7_CC	Post_D0	-1.26113	0.375914	-3.35485	12	0.00572851	0.643025	NA	0	0	CLUS_HUMAN	P10909	FALSE	CLUS	CLU
4718	Post_D7_CM_vs_Post_D0	Post_D7_CM	Post_D0	-0.676662	0.238957	-2.83173	11	0.0163217	0.581378	NA	0	0	PGS2_HUMAN	P07585	FALSE	PGS2	DCN
1801	Post_D7_CC_vs_Post_D0	Post_D7_CC	Post_D0	-1.36648	1.05656	-1.29333	0	NA	NA	NA	0	0	DNPEP_HUMAN	Q9ULA0	FALSE	DNPEP	DNPEP
1802	Post_D7_CM_vs_Post_D0	Post_D7_CM	Post_D0	-0.611321	0.873831	-0.699588	0	NA	NA	NA	0	0	DNPEP_HUMAN	Q9ULA0	FALSE	DNPEP	DNPEP
2137	Post_D7_CC_vs_Post_D0	Post_D7_CC	Post_D0	-1.38467	0.485786	-2.85036	16	0.0115723	0.657436	NA	0	0	FBLN1_HUMAN	P23142	FALSE	FBLN1	FBLN1
2233	Post_D7_CC_vs_Post_D0	Post_D7_CC	Post_D0	(-Inf)	NA	NA	NA	0	0	oneConditionMissing	0.514706	0	FHL3_HUMAN	Q13643	FALSE	FHL3	FHL3
2234	Post_D7_CM_vs_Post_D0	Post_D7_CM	Post_D0	-0.0412024	0.0149295	-2.75981	0	NA	NA	NA	0	0	FHL3_HUMAN	Q13643	FALSE	FHL3	FHL3
2329	Post_D7_CC_vs_Post_D0	Post_D7_CC	Post_D0	-1.26155	0.507383	-2.48639	15	0.0251727	0.657436	NA	0	0	FMOD_HUMAN	Q06828	FALSE	FMOD	FMOD
2342	Post_D7_CM_vs_Post_D0	Post_D7_CM	Post_D0	1.12987	0.377918	2.98973	13	0.0104431	0.493938	NA	0	0	FRIH_HUMAN	P02794	FALSE	FRIH	FTH1
673	Post_D7_CC_vs_Post_D0	Post_D7_CC	Post_D0	-0.631138	0.152758	-4.13162	0	NA	NA	NA	0	0	BGAL_HUMAN	P16278	FALSE	BGAL	GLB1
674	Post_D7_CM_vs_Post_D0	Post_D7_CM	Post_D0	-0.188334	0.0630307	-2.98797	0	NA	NA	NA	0	0	BGAL_HUMAN	P16278	FALSE	BGAL	GLB1
2425	Post_D7_CC_vs_Post_D0	Post_D7_CC	Post_D0	-0.516307	0.170254	-3.03257	14	0.00895418	0.657436	NA	0	0	G6PI_HUMAN	P06744	FALSE	G6PI	GPI
2593	Post_D7_CC_vs_Post_D0	Post_D7_CC	Post_D0	Inf	NA	NA	NA	0	0	oneConditionMissing	0.625	0	GPX1_HUMAN	P07203	FALSE	GPX1	GPX1
2594	Post_D7_CM_vs_Post_D0	Post_D7_CM	Post_D0	Inf	NA	NA	NA	0	0	oneConditionMissing	0.625	0	GPX1_HUMAN	P07203	FALSE	GPX1	GPX1
2701	Post_D7_CC_vs_Post_D0	Post_D7_CC	Post_D0	(-Inf)	NA	NA	NA	0	0	oneConditionMissing	0.503876	0	HBA_HUMAN;cRAP-HBA_HUMAN	P69905;cRAP-P69905	FALSE	HBA	HBA1; HBA2
2725	Post_D7_CC_vs_Post_D0	Post_D7_CC	Post_D0	(-Inf)	NA	NA	NA	0	0	oneConditionMissing	0.675676	0	HDGF_HUMAN	P51858	FALSE	HDGF	HDGF
2821	Post_D7_CC_vs_Post_D0	Post_D7_CC	Post_D0	-1.27264	0.411395	-3.09347	6	0.0212932	0.657436	NA	0	0	HNRPR_HUMAN	O43390	FALSE	HNRPR	HNRNPR
1777	Post_D7_CC_vs_Post_D0	Post_D7_CC	Post_D0	(-Inf)	NA	NA	NA	0	0	oneConditionMissing	0.75	0	DHB4_HUMAN	P51659	FALSE	DHB4	HSD17B4
2894	Post_D7_CM_vs_Post_D0	Post_D7_CM	Post_D0	0.715209	0.245191	2.91694	16	0.01008	0.493938	NA	0	0	HSPB1_HUMAN	P04792	FALSE	HSPB1	HSPB1
3037	Post_D7_CC_vs_Post_D0	Post_D7_CC	Post_D0	(-Inf)	NA	NA	NA	0	0	oneConditionMissing	0.753425	0	ICAM1_HUMAN	P05362	FALSE	ICAM1	ICAM1
3038	Post_D7_CM_vs_Post_D0	Post_D7_CM	Post_D0	-0.413928	2.321	-0.17834	0	NA	NA	NA	0	0	ICAM1_HUMAN	P05362	FALSE	ICAM1	ICAM1
3061	Post_D7_CC_vs_Post_D0	Post_D7_CC	Post_D0	-1.57123	0.64457	-2.43764	14	0.0287184	0.657436	NA	0	0	IDHC_HUMAN	O75874	FALSE	IDHC	IDH1
3169	Post_D7_CC_vs_Post_D0	Post_D7_CC	Post_D0	-1.62183	0.925323	-1.75272	0	NA	NA	NA	0	0	ISG15_HUMAN	P05161	FALSE	ISG15	ISG15
3170	Post_D7_CM_vs_Post_D0	Post_D7_CM	Post_D0	-0.41472	0.755523	-0.548917	0	NA	NA	NA	0	0	ISG15_HUMAN	P05161	FALSE	ISG15	ISG15
3205	Post_D7_CC_vs_Post_D0	Post_D7_CC	Post_D0	Inf	NA	NA	NA	0	0	oneConditionMissing	0.625	0	ITIH2_HUMAN	P19823	FALSE	ITIH2	ITIH2
3206	Post_D7_CM_vs_Post_D0	Post_D7_CM	Post_D0	Inf	NA	NA	NA	0	0	oneConditionMissing	0.561798	0	ITIH2_HUMAN	P19823	FALSE	ITIH2	ITIH2
3217	Post_D7_CC_vs_Post_D0	Post_D7_CC	Post_D0	(-Inf)	NA	NA	NA	0	0	oneConditionMissing	0.75	0	JUPI1_HUMAN	Q9UK76	FALSE	JUPI1	JPT1
3218	Post_D7_CM_vs_Post_D0	Post_D7_CM	Post_D0	(-Inf)	NA	NA	NA	0	0	oneConditionMissing	0.75	0	JUPI1_HUMAN	Q9UK76	FALSE	JUPI1	JPT1
2389	Post_D7_CC_vs_Post_D0	Post_D7_CC	Post_D0	-0.733262	0.322619	-2.27284	15	0.0381734	0.657436	NA	0	0	FUBP2_HUMAN	Q92945	FALSE	FUBP2	KHSRP
3577	Post_D7_CC_vs_Post_D0	Post_D7_CC	Post_D0	(-Inf)	NA	NA	NA	0	0	oneConditionMissing	0.853659	0	KLK7_HUMAN	P49862	FALSE	KLK7	KLK7
3578	Post_D7_CM_vs_Post_D0	Post_D7_CM	Post_D0	1.32919	0.820173	1.62062	0	NA	NA	NA	0	0	KLK7_HUMAN	P49862	FALSE	KLK7	KLK7
3590	Post_D7_CM_vs_Post_D0	Post_D7_CM	Post_D0	1.58291	0.544085	2.9093	5	0.033427	0.689988	NA	0	0	KPLCE_HUMAN	Q5T750	FALSE	KPLCE	KPLCE
3602	Post_D7_CM_vs_Post_D0	Post_D7_CM	Post_D0	1.6687	0.497971	3.35099	16	0.0040588	0.493938	NA	0	0	KPRP_HUMAN	Q5T749	FALSE	KPRP	KPRP
3242	Post_D7_CM_vs_Post_D0	Post_D7_CM	Post_D0	1.36996	0.513025	2.67035	16	0.0167581	0.581378	NA	0	0	K1C13_HUMAN	P13646	FALSE	K1C13	KRT13
3470	Post_D7_CM_vs_Post_D0	Post_D7_CM	Post_D0	1.3755	0.475501	2.89274	16	0.0105995	0.493938	NA	0	0	K2C78_HUMAN	Q8N1N4	FALSE	K2C78	KRT78
3482	Post_D7_CM_vs_Post_D0	Post_D7_CM	Post_D0	2.33835	0.766349	3.05129	12	0.0100606	0.493938	NA	0	0	K2C79_HUMAN	Q5XKE5	FALSE	K2C79	KRT79
3710	Post_D7_CM_vs_Post_D0	Post_D7_CM	Post_D0	-2.69057	1.03758	-2.59312	8	0.0319579	0.689988	NA	0	0	LCN1_HUMAN	P31025	FALSE	LCN1	LCN1
3781	Post_D7_CC_vs_Post_D0	Post_D7_CC	Post_D0	-1.12597	0.401343	-2.80552	16	0.012696	0.657436	NA	0	0	LG3BP_HUMAN	Q08380	FALSE	LG3BP	LGALS3BP
3805	Post_D7_CC_vs_Post_D0	Post_D7_CC	Post_D0	(-Inf)	NA	NA	NA	0	0	oneConditionMissing	0.75	0	LIMA1_HUMAN	Q9UHB6	FALSE	LIMA1	LIMA1
3806	Post_D7_CM_vs_Post_D0	Post_D7_CM	Post_D0	-0.554806	0.439606	-1.26205	0	NA	NA	NA	0	0	LIMA1_HUMAN	Q9UHB6	FALSE	LIMA1	LIMA1
3841	Post_D7_CC_vs_Post_D0	Post_D7_CC	Post_D0	(-Inf)	NA	NA	NA	0	0	oneConditionMissing	0.555556	0	LMNB1_HUMAN	P20700	FALSE	LMNB1	LMNB1
3842	Post_D7_CM_vs_Post_D0	Post_D7_CM	Post_D0	-0.656605	0.927134	-0.70821	0	NA	NA	NA	0	0	LMNB1_HUMAN	P20700	FALSE	LMNB1	LMNB1
3949	Post_D7_CC_vs_Post_D0	Post_D7_CC	Post_D0	(-Inf)	NA	NA	NA	0	0	oneConditionMissing	0.5	0	LYPA1_HUMAN	O75608	FALSE	LYPA1	LYPLA1
3950	Post_D7_CM_vs_Post_D0	Post_D7_CM	Post_D0	3.13482	0.005173	605.997	0	NA	NA	NA	0	0	LYPA1_HUMAN	O75608	FALSE	LYPA1	LYPLA1
4045	Post_D7_CC_vs_Post_D0	Post_D7_CC	Post_D0	(-Inf)	NA	NA	NA	0	0	oneConditionMissing	0.541401	0	MK01_HUMAN	P28482	FALSE	MK01	MAPK1
1969	Post_D7_CC_vs_Post_D0	Post_D7_CC	Post_D0	Inf	NA	NA	NA	0	0	oneConditionMissing	0.526316	0	EFNMT_HUMAN	Q8N6R0	FALSE	EFNMT	METTL13
1970	Post_D7_CM_vs_Post_D0	Post_D7_CM	Post_D0	Inf	NA	NA	NA	0	0	oneConditionMissing	0.689655	0	EFNMT_HUMAN	Q8N6R0	FALSE	EFNMT	METTL13
4021	Post_D7_CC_vs_Post_D0	Post_D7_CC	Post_D0	-1.32427	0.559878	-2.36528	15	0.0319154	0.657436	NA	0	0	MGP_HUMAN	P08493	FALSE	MGP	MGP
4057	Post_D7_CC_vs_Post_D0	Post_D7_CC	Post_D0	-1.32982	0.584456	-2.27531	15	0.0379922	0.657436	NA	0	0	MMP2_HUMAN	P08253	FALSE	MMP2	MMP2
4082	Post_D7_CM_vs_Post_D0	Post_D7_CM	Post_D0	1.94451	0.475796	4.08685	12	0.00150741	0.351226	NA	0	0	MT2_HUMAN	P02795	FALSE	MT2	MT2A
4117	Post_D7_CC_vs_Post_D0	Post_D7_CC	Post_D0	0.414789	0.541464	0.766051	0	NA	NA	NA	0	0	MXRA5_HUMAN	Q9NR99	FALSE	MXRA5	MXRA5
4118	Post_D7_CM_vs_Post_D0	Post_D7_CM	Post_D0	0.356213	0.481653	0.739564	0	NA	NA	NA	0	0	MXRA5_HUMAN	Q9NR99	FALSE	MXRA5	MXRA5
4213	Post_D7_CC_vs_Post_D0	Post_D7_CC	Post_D0	(-Inf)	NA	NA	NA	0	0	oneConditionMissing	0.514706	0	NDRG1_HUMAN	Q92597	FALSE	NDRG1	NDRG1
4214	Post_D7_CM_vs_Post_D0	Post_D7_CM	Post_D0	1.45137	0.757469	1.91608	0	NA	NA	NA	0	0	NDRG1_HUMAN	Q92597	FALSE	NDRG1	NDRG1
4274	Post_D7_CM_vs_Post_D0	Post_D7_CM	Post_D0	-0.807547	0.237962	-3.39359	10	0.00684442	0.493938	NA	0	0	NID2_HUMAN	Q14112	FALSE	NID2	NID2
4285	Post_D7_CC_vs_Post_D0	Post_D7_CC	Post_D0	(-Inf)	NA	NA	NA	0	0	oneConditionMissing	0.545455	0	NNMT_HUMAN	P40261	FALSE	NNMT	NNMT
4333	Post_D7_CC_vs_Post_D0	Post_D7_CC	Post_D0	(-Inf)	NA	NA	NA	0	0	oneConditionMissing	0.744681	0	NRDC_HUMAN	O43847	FALSE	NRDC	NRDC
4334	Post_D7_CM_vs_Post_D0	Post_D7_CM	Post_D0	0.0525817	0.0128944	4.07788	0	NA	NA	NA	0	0	NRDC_HUMAN	O43847	FALSE	NRDC	NRDC
4393	Post_D7_CC_vs_Post_D0	Post_D7_CC	Post_D0	(-Inf)	NA	NA	NA	0	0	oneConditionMissing	0.512821	0	P4HA1_HUMAN	P13674	FALSE	P4HA1	P4HA1
4405	Post_D7_CC_vs_Post_D0	Post_D7_CC	Post_D0	(-Inf)	NA	NA	NA	0	0	oneConditionMissing	0.56338	0	P4HA2_HUMAN	O15460	FALSE	P4HA2	P4HA2
4406	Post_D7_CM_vs_Post_D0	Post_D7_CM	Post_D0	(-Inf)	NA	NA	NA	0	0	oneConditionMissing	0.56338	0	P4HA2_HUMAN	O15460	FALSE	P4HA2	P4HA2
4501	Post_D7_CC_vs_Post_D0	Post_D7_CC	Post_D0	(-Inf)	NA	NA	NA	0	0	oneConditionMissing	0.625	0	PDC6I_HUMAN	Q8WUM4	FALSE	PDC6I	PDCD6IP
4573	Post_D7_CC_vs_Post_D0	Post_D7_CC	Post_D0	(-Inf)	NA	NA	NA	0	0	oneConditionMissing	0.6	0	PDLI4_HUMAN	P50479	FALSE	PDLI4	PDLIM4
4574	Post_D7_CM_vs_Post_D0	Post_D7_CM	Post_D0	-0.626887	1.98915	-0.315154	0	NA	NA	NA	0	0	PDLI4_HUMAN	P50479	FALSE	PDLI4	PDLIM4
4706	Post_D7_CM_vs_Post_D0	Post_D7_CM	Post_D0	0.567037	0.263934	2.1484	15	0.0484212	0.801622	NA	0	0	PGM2_HUMAN	Q96G03	FALSE	PGM2	PGM2
4417	Post_D7_CC_vs_Post_D0	Post_D7_CC	Post_D0	(-Inf)	NA	NA	NA	0	0	oneConditionMissing	0.510204	0	PA2GA_HUMAN	P14555	FALSE	PA2GA	PLA2G2A
4418	Post_D7_CM_vs_Post_D0	Post_D7_CM	Post_D0	-0.544906	0.00660486	-82.5007	0	NA	NA	NA	0	0	PA2GA_HUMAN	P14555	FALSE	PA2GA	PLA2G2A
4789	Post_D7_CC_vs_Post_D0	Post_D7_CC	Post_D0	-2.15713	1.29269	-1.66871	0	NA	NA	NA	0	0	PLIN3_HUMAN	O60664	FALSE	PLIN3	PLIN3
4790	Post_D7_CM_vs_Post_D0	Post_D7_CM	Post_D0	-0.276408	0.191033	-1.44691	0	NA	NA	NA	0	0	PLIN3_HUMAN	O60664	FALSE	PLIN3	PLIN3
4813	Post_D7_CC_vs_Post_D0	Post_D7_CC	Post_D0	-3.00256	1.09881	-2.73255	6	0.0340707	0.657436	NA	0	0	PLOD2_HUMAN	O00469	FALSE	PLOD2	PLOD2
4177	Post_D7_CC_vs_Post_D0	Post_D7_CC	Post_D0	-1.71107	0.122206	-14.0015	1	0.0453909	0.657436	NA	0	0	MYPT1_HUMAN	O14974	FALSE	MYPT1	PPP1R12A
4178	Post_D7_CM_vs_Post_D0	Post_D7_CM	Post_D0	-2.02134	0.0952227	-21.2275	1	0.0299682	0.689988	NA	0	0	MYPT1_HUMAN	O14974	FALSE	MYPT1	PPP1R12A
4957	Post_D7_CC_vs_Post_D0	Post_D7_CC	Post_D0	-0.654163	0.253036	-2.58525	6	0.0414755	0.657436	NA	0	0	PRDX3_HUMAN	P30048	FALSE	PRDX3	PRDX3
5017	Post_D7_CC_vs_Post_D0	Post_D7_CC	Post_D0	(-Inf)	NA	NA	NA	0	0	oneConditionMissing	0.520833	0	PRKDC_HUMAN	P78527	FALSE	PRKDC	PRKDC
5005	Post_D7_CC_vs_Post_D0	Post_D7_CC	Post_D0	-4.43333	0.746932	-5.93539	2	0.0272316	0.657436	NA	0	0	PRIO_HUMAN	P04156	FALSE	PRIO	PRNP
5149	Post_D7_CC_vs_Post_D0	Post_D7_CC	Post_D0	(-Inf)	NA	NA	NA	0	0	oneConditionMissing	0.5	0	PSB8_HUMAN	P28062	FALSE	PSB8	PSMB8
5150	Post_D7_CM_vs_Post_D0	Post_D7_CM	Post_D0	-0.653563	0.220174	-2.9684	0	NA	NA	NA	0	0	PSB8_HUMAN	P28062	FALSE	PSB8	PSMB8
5198	Post_D7_CM_vs_Post_D0	Post_D7_CM	Post_D0	-0.693619	0.303127	-2.28821	16	0.0360712	0.689988	NA	0	0	PTMA_HUMAN	P06454	FALSE	PTMA	PTMA
5257	Post_D7_CC_vs_Post_D0	Post_D7_CC	Post_D0	-0.752768	0.335952	-2.2407	16	0.0395854	0.657436	NA	0	0	QSOX1_HUMAN	O00391	FALSE	QSOX1	QSOX1
6469	Post_D7_CC_vs_Post_D0	Post_D7_CC	Post_D0	(-Inf)	NA	NA	NA	0	0	oneConditionMissing	0.503597	0	TIG1_HUMAN	P49788	FALSE	TIG1	RARRES1
5281	Post_D7_CC_vs_Post_D0	Post_D7_CC	Post_D0	-0.944083	0.316974	-2.97842	8	0.0176429	0.657436	NA	0	0	RARR2_HUMAN	Q99969	FALSE	RARR2	RARRES2
5461	Post_D7_CC_vs_Post_D0	Post_D7_CC	Post_D0	-0.859773	0.313273	-2.74449	12	0.0177829	0.657436	NA	0	0	RLA0_HUMAN	P05388	FALSE	RLA0	RPLP0
5630	Post_D7_CM_vs_Post_D0	Post_D7_CM	Post_D0	0.866661	0.291589	2.9722	15	0.00949506	0.493938	NA	0	0	S10AB_HUMAN	P31949	FALSE	S10AB	S100A11
5653	Post_D7_CC_vs_Post_D0	Post_D7_CC	Post_D0	(-Inf)	NA	NA	NA	0	0	oneConditionMissing	0.625	0	S10AG_HUMAN	Q96FQ6	FALSE	S10AG	S100A16
5654	Post_D7_CM_vs_Post_D0	Post_D7_CM	Post_D0	0.710142	0.00205368	345.79	0	NA	NA	NA	0	0	S10AG_HUMAN	Q96FQ6	FALSE	S10AG	S100A16
5593	Post_D7_CC_vs_Post_D0	Post_D7_CC	Post_D0	1.19357	2.19953	0.542649	0	NA	NA	NA	0	0	S10A7_HUMAN	P31151	FALSE	S10A7	S100A7
5594	Post_D7_CM_vs_Post_D0	Post_D7_CM	Post_D0	3.881	2.7822	1.39494	0	NA	NA	NA	0	0	S10A7_HUMAN	P31151	FALSE	S10A7	S100A7
5605	Post_D7_CC_vs_Post_D0	Post_D7_CC	Post_D0	(-Inf)	NA	NA	NA	0	0	oneConditionMissing	0.5	0	S10A8_HUMAN	P05109	FALSE	S10A8	S100A8
5606	Post_D7_CM_vs_Post_D0	Post_D7_CM	Post_D0	1.50586	1.04686	1.43846	0	NA	NA	NA	0	0	S10A8_HUMAN	P05109	FALSE	S10A8	S100A8
5689	Post_D7_CC_vs_Post_D0	Post_D7_CC	Post_D0	0.422412	0.490106	0.861879	0	NA	NA	NA	0	0	SARNP_HUMAN	P82979	FALSE	SARNP	SARNP
5690	Post_D7_CM_vs_Post_D0	Post_D7_CM	Post_D0	-0.251501	0.43143	-0.582947	0	NA	NA	NA	0	0	SARNP_HUMAN	P82979	FALSE	SARNP	SARNP
5701	Post_D7_CC_vs_Post_D0	Post_D7_CC	Post_D0	-0.65647	1.30382	-0.503495	0	NA	NA	NA	0	0	SBSN_HUMAN	Q6UWP8	FALSE	SBSN	SBSN
5702	Post_D7_CM_vs_Post_D0	Post_D7_CM	Post_D0	-0.249564	0.921943	-0.270693	0	NA	NA	NA	0	0	SBSN_HUMAN	Q6UWP8	FALSE	SBSN	SBSN
5761	Post_D7_CC_vs_Post_D0	Post_D7_CC	Post_D0	(-Inf)	NA	NA	NA	0	0	oneConditionMissing	0.526316	0	SEPT9_HUMAN	Q9UHD8	FALSE	2025-09-09	SEPTIN9
86	Post_D7_CM_vs_Post_D0	Post_D7_CM	Post_D0	-1.61672	0.443659	-3.64406	3	0.0356402	0.689988	NA	0	0	AACT_HUMAN	P01011	FALSE	AACT	SERPINA3
4622	Post_D7_CM_vs_Post_D0	Post_D7_CM	Post_D0	-1.43623	0.402903	-3.5647	7	0.00916159	0.493938	NA	0	0	PEDF_HUMAN	P36955	FALSE	PEDF	SERPINF1
3025	Post_D7_CC_vs_Post_D0	Post_D7_CC	Post_D0	-0.897955	0.34575	-2.59712	9	0.0288743	0.657436	NA	0	0	IC1_HUMAN	P05155	FALSE	IC1	SERPING1
3026	Post_D7_CM_vs_Post_D0	Post_D7_CM	Post_D0	-0.796163	0.312695	-2.54613	9	0.0313935	0.689988	NA	0	0	IC1_HUMAN	P05155	FALSE	IC1	SERPING1
5809	Post_D7_CC_vs_Post_D0	Post_D7_CC	Post_D0	(-Inf)	NA	NA	NA	0	0	oneConditionMissing	0.510204	0	SFRP4_HUMAN	Q6FHJ7	FALSE	SFRP4	SFRP4
5810	Post_D7_CM_vs_Post_D0	Post_D7_CM	Post_D0	0.671407	0.00339723	197.634	0	NA	NA	NA	0	0	SFRP4_HUMAN	Q6FHJ7	FALSE	SFRP4	SFRP4
5833	Post_D7_CC_vs_Post_D0	Post_D7_CC	Post_D0	1.03606	2.93476	0.35303	0	NA	NA	NA	0	0	SIL1_HUMAN	Q9H173	FALSE	SIL1	SIL1
5834	Post_D7_CM_vs_Post_D0	Post_D7_CM	Post_D0	-2.60833	2.39622	-1.08852	0	NA	NA	NA	0	0	SIL1_HUMAN	Q9H173	FALSE	SIL1	SIL1
6049	Post_D7_CC_vs_Post_D0	Post_D7_CC	Post_D0	-1.17275	0.407682	-2.87663	8	0.0206179	0.657436	NA	0	0	STC2_HUMAN	O76061	FALSE	STC2	STC2
6218	Post_D7_CM_vs_Post_D0	Post_D7_CM	Post_D0	-0.71654	0.313748	-2.2838	16	0.0363846	0.689988	NA	0	0	TAGL_HUMAN	Q01995	FALSE	TAGL	TAGLN
6385	Post_D7_CC_vs_Post_D0	Post_D7_CC	Post_D0	(-Inf)	NA	NA	NA	0	0	oneConditionMissing	0.588235	0	TENA_HUMAN	P24821	FALSE	TENA	TNC
6541	Post_D7_CC_vs_Post_D0	Post_D7_CC	Post_D0	(-Inf)	NA	NA	NA	0	0	oneConditionMissing	0.550847	0	TPD54_HUMAN	O43399	FALSE	TPD54	TPD52L2
6554	Post_D7_CM_vs_Post_D0	Post_D7_CM	Post_D0	0.731234	0.281295	2.59953	16	0.0193593	0.601428	NA	0	0	TPIS_HUMAN	P60174	FALSE	TPIS	TPI1
6265	Post_D7_CC_vs_Post_D0	Post_D7_CC	Post_D0	-4.54664	1.57409	-2.88843	7	0.0233687	0.657436	NA	0	0	TBB6_HUMAN	Q9BUF5	FALSE	TBB6	TUBB6
6673	Post_D7_CC_vs_Post_D0	Post_D7_CC	Post_D0	(-Inf)	NA	NA	NA	0	0	oneConditionMissing	0.681818	0	TWF1_HUMAN	Q12792	FALSE	TWF1	TWF1
6937	Post_D7_CC_vs_Post_D0	Post_D7_CC	Post_D0	Inf	NA	NA	NA	0	0	oneConditionMissing	0.566038	0	WFD12_HUMAN	Q8WWY7	FALSE	WFD12	WFDC12
6938	Post_D7_CM_vs_Post_D0	Post_D7_CM	Post_D0	Inf	NA	NA	NA	0	0	oneConditionMissing	0.535714	0	WFD12_HUMAN	Q8WWY7	FALSE	WFD12	WFDC12
13	Post_D7_CC_vs_Post_D0	Post_D7_CC	Post_D0	(-Inf)	NA	NA	NA	0	0	oneConditionMissing	0.581395	0	1433F_HUMAN	Q04917	FALSE	1433F	YWHAH
14	Post_D7_CM_vs_Post_D0	Post_D7_CM	Post_D0	0.0487188	0.00287227	16.9618	0	NA	NA	NA	0	0	1433F_HUMAN	Q04917	FALSE	1433F	YWHAH
38	Post_D7_CM_vs_Post_D0	Post_D7_CM	Post_D0	0.681071	0.314569	2.16509	16	0.0458394	0.801622	NA	0	0	1433Z_HUMAN	P63104	FALSE	1433Z	YWHAZ
15	Post_D7_CM_vs_Post_D7_CC	Post_D7_CM	Post_D7_CC	Inf	NA	NA	NA	0	0	oneConditionMissing	0.675676	0	1433F_HUMAN	Q04917	FALSE	1433F	YWHAH
39	Post_D7_CM_vs_Post_D7_CC	Post_D7_CM	Post_D7_CC	0.859547	0.314569	2.73246	16	0.0147564	0.543064	NA	0	0	1433Z_HUMAN	P63104	FALSE	1433Z	YWHAZ
63	Post_D7_CM_vs_Post_D7_CC	Post_D7_CM	Post_D7_CC	0.999496	0.411517	2.42881	13	0.0303988	0.560724	NA	0	0	6PGL_HUMAN	O95336	FALSE	6PGL	PGLS
147	Post_D7_CM_vs_Post_D7_CC	Post_D7_CM	Post_D7_CC	-0.55354	0.981259	-0.564112	0	NA	NA	NA	0	0	ACPH_HUMAN	P13798	FALSE	ACPH	APEH
219	Post_D7_CM_vs_Post_D7_CC	Post_D7_CM	Post_D7_CC	Inf	NA	NA	NA	0	0	oneConditionMissing	0.625	0	ADML_HUMAN	P35318	FALSE	ADML	ADM
231	Post_D7_CM_vs_Post_D7_CC	Post_D7_CM	Post_D7_CC	Inf	NA	NA	NA	0	0	oneConditionMissing	0.510204	0	ADRM1_HUMAN	Q16186	FALSE	ADRM1	ADRM1
315	Post_D7_CM_vs_Post_D7_CC	Post_D7_CM	Post_D7_CC	Inf	NA	NA	NA	0	0	oneConditionMissing	0.512821	0	AK1C1_HUMAN;AK1C3_HUMAN	P42330;Q04828	FALSE	AK1C1	AKR1C1
327	Post_D7_CM_vs_Post_D7_CC	Post_D7_CM	Post_D7_CC	Inf	NA	NA	NA	0	0	oneConditionMissing	0.590062	0	AKA12_HUMAN	Q02952	FALSE	AKA12	AKAP12
339	Post_D7_CM_vs_Post_D7_CC	Post_D7_CM	Post_D7_CC	2.41858	0.754079	3.20733	3	0.0490561	0.606653	NA	0	0	AL9A1_HUMAN	P49189	FALSE	AL9A1	ALDH9A1
363	Post_D7_CM_vs_Post_D7_CC	Post_D7_CM	Post_D7_CC	0.942971	0.360267	2.61742	16	0.0186678	0.543064	NA	0	0	ALDOA_HUMAN	P04075	FALSE	ALDOA	ALDOA
555	Post_D7_CM_vs_Post_D7_CC	Post_D7_CM	Post_D7_CC	Inf	NA	NA	NA	0	0	oneConditionMissing	0.5	0	APT_HUMAN	P07741	FALSE	APT	APRT
675	Post_D7_CM_vs_Post_D7_CC	Post_D7_CM	Post_D7_CC	0.442804	0.161026	2.7499	0	NA	NA	NA	0	0	BGAL_HUMAN	P16278	FALSE	BGAL	GLB1
735	Post_D7_CM_vs_Post_D7_CC	Post_D7_CM	Post_D7_CC	-0.355291	0.663547	-0.535442	0	NA	NA	NA	0	0	BMP1_HUMAN	P13497	FALSE	BMP1	BMP1
759	Post_D7_CM_vs_Post_D7_CC	Post_D7_CM	Post_D7_CC	1.35649	0.606272	2.23743	14	0.042038	0.603558	NA	0	0	C1S_HUMAN	P09871	FALSE	C1S	C1S
927	Post_D7_CM_vs_Post_D7_CC	Post_D7_CM	Post_D7_CC	0.739806	0.297425	2.48737	16	0.0242833	0.543064	NA	0	0	CATD_HUMAN;cRAP-CATD_HUMAN	P07339;cRAP-P07339	FALSE	CATD	CTSD
1011	Post_D7_CM_vs_Post_D7_CC	Post_D7_CM	Post_D7_CC	4.14216	1.2143	3.41116	7	0.0112701	0.543064	NA	0	0	CBR1_HUMAN	P16152	FALSE	CBR1	CBR1
1035	Post_D7_CM_vs_Post_D7_CC	Post_D7_CM	Post_D7_CC	Inf	NA	NA	NA	0	0	oneConditionMissing	0.714286	0	CD248_HUMAN	Q9HCU0	FALSE	CD248	CD248
1143	Post_D7_CM_vs_Post_D7_CC	Post_D7_CM	Post_D7_CC	-0.917092	0.311929	-2.94007	5	0.032254	0.560724	NA	0	0	CHM4A_HUMAN	Q9BY43	FALSE	CHM4A	CHMP4A
1779	Post_D7_CM_vs_Post_D7_CC	Post_D7_CM	Post_D7_CC	Inf	NA	NA	NA	0	0	oneConditionMissing	0.517241	0	DHB4_HUMAN	P51659	FALSE	DHB4	HSD17B4
1803	Post_D7_CM_vs_Post_D7_CC	Post_D7_CM	Post_D7_CC	0.755159	0.873831	0.864193	0	NA	NA	NA	0	0	DNPEP_HUMAN	Q9ULA0	FALSE	DNPEP	DNPEP
1959	Post_D7_CM_vs_Post_D7_CC	Post_D7_CM	Post_D7_CC	0.82369	0.355864	2.31462	16	0.0342459	0.561309	NA	0	0	EF2_HUMAN	P13639	FALSE	EF2	EEF2
1971	Post_D7_CM_vs_Post_D7_CC	Post_D7_CM	Post_D7_CC	-0.671027	0.0129498	-51.8174	1	0.0122843	0.543064	NA	0	0	EFNMT_HUMAN	Q8N6R0	FALSE	EFNMT	METTL13
2127	Post_D7_CM_vs_Post_D7_CC	Post_D7_CM	Post_D7_CC	0.662731	0.236079	2.80724	13	0.0148229	0.543064	NA	0	0	FAS_HUMAN	P49327	FALSE	FAS	FASN
2235	Post_D7_CM_vs_Post_D7_CC	Post_D7_CM	Post_D7_CC	Inf	NA	NA	NA	0	0	oneConditionMissing	0.76087	0	FHL3_HUMAN	Q13643	FALSE	FHL3	FHL3
2343	Post_D7_CM_vs_Post_D7_CC	Post_D7_CM	Post_D7_CC	0.896942	0.356724	2.51438	13	0.0258769	0.543064	NA	0	0	FRIH_HUMAN	P02794	FALSE	FRIH	FTH1
2427	Post_D7_CM_vs_Post_D7_CC	Post_D7_CM	Post_D7_CC	0.524883	0.170254	3.08294	14	0.00810233	0.543064	NA	0	0	G6PI_HUMAN	P06744	FALSE	G6PI	GPI
2475	Post_D7_CM_vs_Post_D7_CC	Post_D7_CM	Post_D7_CC	0.44648	0.184013	2.42635	15	0.0283258	0.556663	NA	0	0	GDIB_HUMAN	P50395	FALSE	GDIB	GDI2
2487	Post_D7_CM_vs_Post_D7_CC	Post_D7_CM	Post_D7_CC	0.619877	0.245037	2.52973	12	0.0264323	0.543064	NA	0	0	GDIR1_HUMAN	P52565	FALSE	GDIR1	ARHGDIA
2679	Post_D7_CM_vs_Post_D7_CC	Post_D7_CM	Post_D7_CC	1.66232	0.72037	2.3076	14	0.0368158	0.561309	NA	0	0	H37_HUMAN	Q5TEC6	FALSE	H37	H3-7
2703	Post_D7_CM_vs_Post_D7_CC	Post_D7_CM	Post_D7_CC	Inf	NA	NA	NA	0	0	oneConditionMissing	0.698925	0	HBA_HUMAN;cRAP-HBA_HUMAN	P69905;cRAP-P69905	FALSE	HBA	HBA1; HBA2
2727	Post_D7_CM_vs_Post_D7_CC	Post_D7_CM	Post_D7_CC	Inf	NA	NA	NA	0	0	oneConditionMissing	0.675676	0	HDGF_HUMAN	P51858	FALSE	HDGF	HDGF
2979	Post_D7_CM_vs_Post_D7_CC	Post_D7_CM	Post_D7_CC	1.34821	0.543808	2.4792	16	0.0246847	0.543064	NA	0	0	IBP4_HUMAN	P22692	FALSE	IBP4	IGFBP4
2991	Post_D7_CM_vs_Post_D7_CC	Post_D7_CM	Post_D7_CC	0.589452	0.259471	2.27174	16	0.037255	0.561309	NA	0	0	IBP5_HUMAN	P24593	FALSE	IBP5	IGFBP5
3039	Post_D7_CM_vs_Post_D7_CC	Post_D7_CM	Post_D7_CC	Inf	NA	NA	NA	0	0	oneConditionMissing	0.820896	0	ICAM1_HUMAN	P05362	FALSE	ICAM1	ICAM1
3063	Post_D7_CM_vs_Post_D7_CC	Post_D7_CM	Post_D7_CC	1.72041	0.599431	2.87006	14	0.0123511	0.543064	NA	0	0	IDHC_HUMAN	O75874	FALSE	IDHC	IDH1
3171	Post_D7_CM_vs_Post_D7_CC	Post_D7_CM	Post_D7_CC	1.20711	0.925323	1.30453	0	NA	NA	NA	0	0	ISG15_HUMAN	P05161	FALSE	ISG15	ISG15
3483	Post_D7_CM_vs_Post_D7_CC	Post_D7_CM	Post_D7_CC	2.29499	0.816354	2.81127	12	0.0157124	0.543064	NA	0	0	K2C79_HUMAN	Q5XKE5	FALSE	K2C79	KRT79
3579	Post_D7_CM_vs_Post_D7_CC	Post_D7_CM	Post_D7_CC	Inf	NA	NA	NA	0	0	oneConditionMissing	0.514706	0	KLK7_HUMAN	P49862	FALSE	KLK7	KLK7
3591	Post_D7_CM_vs_Post_D7_CC	Post_D7_CM	Post_D7_CC	2.11096	0.508945	4.14771	5	0.00892989	0.543064	NA	0	0	KPLCE_HUMAN	Q5T750	FALSE	KPLCE	KPLCE
3603	Post_D7_CM_vs_Post_D7_CC	Post_D7_CM	Post_D7_CC	1.56784	0.497971	3.14845	16	0.0062154	0.543064	NA	0	0	KPRP_HUMAN	Q5T749	FALSE	KPRP	KPRP
3723	Post_D7_CM_vs_Post_D7_CC	Post_D7_CM	Post_D7_CC	0.765901	0.305254	2.50907	16	0.0232462	0.543064	NA	0	0	LDHA_HUMAN	P00338	FALSE	LDHA	LDHA
3807	Post_D7_CM_vs_Post_D7_CC	Post_D7_CM	Post_D7_CC	Inf	NA	NA	NA	0	0	oneConditionMissing	0.5	0	LIMA1_HUMAN	Q9UHB6	FALSE	LIMA1	LIMA1
3843	Post_D7_CM_vs_Post_D7_CC	Post_D7_CM	Post_D7_CC	Inf	NA	NA	NA	0	0	oneConditionMissing	0.714286	0	LMNB1_HUMAN	P20700	FALSE	LMNB1	LMNB1
3951	Post_D7_CM_vs_Post_D7_CC	Post_D7_CM	Post_D7_CC	Inf	NA	NA	NA	0	0	oneConditionMissing	0.75	0	LYPA1_HUMAN	O75608	FALSE	LYPA1	LYPLA1
4047	Post_D7_CM_vs_Post_D7_CC	Post_D7_CM	Post_D7_CC	Inf	NA	NA	NA	0	0	oneConditionMissing	0.541401	0	MK01_HUMAN	P28482	FALSE	MK01	MAPK1
4083	Post_D7_CM_vs_Post_D7_CC	Post_D7_CM	Post_D7_CC	1.21859	0.475796	2.56116	12	0.0249483	0.543064	NA	0	0	MT2_HUMAN	P02795	FALSE	MT2	MT2A
4119	Post_D7_CM_vs_Post_D7_CC	Post_D7_CM	Post_D7_CC	-0.0585761	0.381059	-0.153719	0	NA	NA	NA	0	0	MXRA5_HUMAN	Q9NR99	FALSE	MXRA5	MXRA5
4215	Post_D7_CM_vs_Post_D7_CC	Post_D7_CM	Post_D7_CC	Inf	NA	NA	NA	0	0	oneConditionMissing	0.76087	0	NDRG1_HUMAN	Q92597	FALSE	NDRG1	NDRG1
4287	Post_D7_CM_vs_Post_D7_CC	Post_D7_CM	Post_D7_CC	Inf	NA	NA	NA	0	0	oneConditionMissing	0.714286	0	NNMT_HUMAN	P40261	FALSE	NNMT	NNMT
4335	Post_D7_CM_vs_Post_D7_CC	Post_D7_CM	Post_D7_CC	Inf	NA	NA	NA	0	0	oneConditionMissing	0.522388	0	NRDC_HUMAN	O43847	FALSE	NRDC	NRDC
4395	Post_D7_CM_vs_Post_D7_CC	Post_D7_CM	Post_D7_CC	Inf	NA	NA	NA	0	0	oneConditionMissing	0.638298	0	P4HA1_HUMAN	P13674	FALSE	P4HA1	P4HA1
4419	Post_D7_CM_vs_Post_D7_CC	Post_D7_CM	Post_D7_CC	Inf	NA	NA	NA	0	0	oneConditionMissing	0.806452	0	PA2GA_HUMAN	P14555	FALSE	PA2GA	PLA2G2A
4431	Post_D7_CM_vs_Post_D7_CC	Post_D7_CM	Post_D7_CC	0.762725	0.289601	2.63371	16	0.0180591	0.543064	NA	0	0	PAI1_HUMAN	P05121	FALSE	PAI1	SERPINE1
4503	Post_D7_CM_vs_Post_D7_CC	Post_D7_CM	Post_D7_CC	Inf	NA	NA	NA	0	0	oneConditionMissing	0.503597	0	PDC6I_HUMAN	Q8WUM4	FALSE	PDC6I	PDCD6IP
4575	Post_D7_CM_vs_Post_D7_CC	Post_D7_CM	Post_D7_CC	Inf	NA	NA	NA	0	0	oneConditionMissing	0.6	0	PDLI4_HUMAN	P50479	FALSE	PDLI4	PDLIM4
4659	Post_D7_CM_vs_Post_D7_CC	Post_D7_CM	Post_D7_CC	3.14292	1.2481	2.51815	6	0.0454003	0.603558	NA	0	0	PFKAP_HUMAN	Q01813	FALSE	PFKAP	PFKP
4791	Post_D7_CM_vs_Post_D7_CC	Post_D7_CM	Post_D7_CC	1.88072	1.2997	1.44704	0	NA	NA	NA	0	0	PLIN3_HUMAN	O60664	FALSE	PLIN3	PLIN3
4863	Post_D7_CM_vs_Post_D7_CC	Post_D7_CM	Post_D7_CC	1.54095	0.536859	2.87031	10	0.0166598	0.543064	NA	0	0	PNPH_HUMAN	P00491	FALSE	PNPH	PNP
5007	Post_D7_CM_vs_Post_D7_CC	Post_D7_CM	Post_D7_CC	4.54251	0.746932	6.08156	2	0.0259884	0.543064	NA	0	0	PRIO_HUMAN	P04156	FALSE	PRIO	PRNP
5019	Post_D7_CM_vs_Post_D7_CC	Post_D7_CM	Post_D7_CC	Inf	NA	NA	NA	0	0	oneConditionMissing	0.5	0	PRKDC_HUMAN	P78527	FALSE	PRKDC	PRKDC
5151	Post_D7_CM_vs_Post_D7_CC	Post_D7_CM	Post_D7_CC	Inf	NA	NA	NA	0	0	oneConditionMissing	0.6	0	PSB8_HUMAN	P28062	FALSE	PSB8	PSMB8
5223	Post_D7_CM_vs_Post_D7_CC	Post_D7_CM	Post_D7_CC	-0.0796782	0.355418	-0.224182	0	NA	NA	NA	0	0	PUR9_HUMAN	P31939	FALSE	PUR9	ATIC
5235	Post_D7_CM_vs_Post_D7_CC	Post_D7_CM	Post_D7_CC	1.5031	0.677257	2.21939	13	0.0448689	0.603558	NA	0	0	PXDN_HUMAN	Q92626	FALSE	PXDN	PXDN
5331	Post_D7_CM_vs_Post_D7_CC	Post_D7_CM	Post_D7_CC	-1.55236	0.880394	-1.76326	0	NA	NA	NA	0	0	RHG01_HUMAN	Q07960	FALSE	RHG01	ARHGAP1
5463	Post_D7_CM_vs_Post_D7_CC	Post_D7_CM	Post_D7_CC	0.841782	0.287759	2.9253	12	0.0127146	0.543064	NA	0	0	RLA0_HUMAN	P05388	FALSE	RLA0	RPLP0
5595	Post_D7_CM_vs_Post_D7_CC	Post_D7_CM	Post_D7_CC	2.68743	2.95097	0.910691	0	NA	NA	NA	0	0	S10A7_HUMAN	P31151	FALSE	S10A7	S100A7
5607	Post_D7_CM_vs_Post_D7_CC	Post_D7_CM	Post_D7_CC	Inf	NA	NA	NA	0	0	oneConditionMissing	0.5	0	S10A8_HUMAN	P05109	FALSE	S10A8	S100A8
5655	Post_D7_CM_vs_Post_D7_CC	Post_D7_CM	Post_D7_CC	Inf	NA	NA	NA	0	0	oneConditionMissing	0.526316	0	S10AG_HUMAN	Q96FQ6	FALSE	S10AG	S100A16
5691	Post_D7_CM_vs_Post_D7_CC	Post_D7_CM	Post_D7_CC	-0.673912	0.615761	-1.09444	0	NA	NA	NA	0	0	SARNP_HUMAN	P82979	FALSE	SARNP	SARNP
5703	Post_D7_CM_vs_Post_D7_CC	Post_D7_CM	Post_D7_CC	0.406906	1.19022	0.341874	0	NA	NA	NA	0	0	SBSN_HUMAN	Q6UWP8	FALSE	SBSN	SBSN
5763	Post_D7_CM_vs_Post_D7_CC	Post_D7_CM	Post_D7_CC	Inf	NA	NA	NA	0	0	oneConditionMissing	0.618557	0	SEPT9_HUMAN	Q9UHD8	FALSE	2025-09-09	SEPTIN9
5811	Post_D7_CM_vs_Post_D7_CC	Post_D7_CM	Post_D7_CC	Inf	NA	NA	NA	0	0	oneConditionMissing	0.675676	0	SFRP4_HUMAN	Q6FHJ7	FALSE	SFRP4	SFRP4
5835	Post_D7_CM_vs_Post_D7_CC	Post_D7_CM	Post_D7_CC	-3.64439	2.93476	-1.2418	0	NA	NA	NA	0	0	SIL1_HUMAN	Q9H173	FALSE	SIL1	SIL1
6051	Post_D7_CM_vs_Post_D7_CC	Post_D7_CM	Post_D7_CC	1.03334	0.407682	2.53466	8	0.0350004	0.561309	NA	0	0	STC2_HUMAN	O76061	FALSE	STC2	STC2
6387	Post_D7_CM_vs_Post_D7_CC	Post_D7_CM	Post_D7_CC	Inf	NA	NA	NA	0	0	oneConditionMissing	0.625	0	TENA_HUMAN	P24821	FALSE	TENA	TNC
6471	Post_D7_CM_vs_Post_D7_CC	Post_D7_CM	Post_D7_CC	Inf	NA	NA	NA	0	0	oneConditionMissing	0.673077	0	TIG1_HUMAN	P49788	FALSE	TIG1	RARRES1
6483	Post_D7_CM_vs_Post_D7_CC	Post_D7_CM	Post_D7_CC	1.38853	0.591026	2.34935	16	0.0319768	0.560724	NA	0	0	TIMP1_HUMAN	P01033	FALSE	TIMP1	TIMP1
6543	Post_D7_CM_vs_Post_D7_CC	Post_D7_CM	Post_D7_CC	Inf	NA	NA	NA	0	0	oneConditionMissing	0.550847	0	TPD54_HUMAN	O43399	FALSE	TPD54	TPD52L2
6555	Post_D7_CM_vs_Post_D7_CC	Post_D7_CM	Post_D7_CC	0.894629	0.281295	3.1804	16	0.00581216	0.543064	NA	0	0	TPIS_HUMAN	P60174	FALSE	TPIS	TPI1
6591	Post_D7_CM_vs_Post_D7_CC	Post_D7_CM	Post_D7_CC	0.838194	0.341841	2.452	7	0.0439782	0.603558	NA	0	0	TRFE_HUMAN;cRAP-TRFE_HUMAN	P02787;cRAP-P02787	FALSE	TRFE	TF
6675	Post_D7_CM_vs_Post_D7_CC	Post_D7_CM	Post_D7_CC	Inf	NA	NA	NA	0	0	oneConditionMissing	0.517241	0	TWF1_HUMAN	Q12792	FALSE	TWF1	TWF1
6939	Post_D7_CM_vs_Post_D7_CC	Post_D7_CM	Post_D7_CC	0.451956	0.561346	0.80513	0	NA	NA	NA	0	0	WFD12_HUMAN	Q8WWY7	FALSE	WFD12	WFDC12
5839	Pre_D0_vs_Post_D0	Pre_D0	Post_D0	-5.97215	2.93476	-2.03497	0	NA	NA	NA	0	0	SIL1_HUMAN	Q9H173	FALSE	SIL1	SIL1
6439	Pre_D0_vs_Post_D0	Pre_D0	Post_D0	-4.45357	1.1844	-3.7602	6	0.00939626	0.993021	NA	0	0	TGM3_HUMAN	Q08188	FALSE	TGM3	TGM3
3715	Pre_D0_vs_Post_D0	Pre_D0	Post_D0	-2.64875	1.13209	-2.33969	8	0.0474385	0.993021	NA	0	0	LCN1_HUMAN	P31025	FALSE	LCN1	LCN1
5707	Pre_D0_vs_Post_D0	Pre_D0	Post_D0	-1.59502	1.06457	-1.49828	0	NA	NA	NA	0	0	SBSN_HUMAN	Q6UWP8	FALSE	SBSN	SBSN
4795	Pre_D0_vs_Post_D0	Pre_D0	Post_D0	-0.998786	0.963517	-1.0366	0	NA	NA	NA	0	0	PLIN3_HUMAN	O60664	FALSE	PLIN3	PLIN3
223	Pre_D0_vs_Post_D0	Pre_D0	Post_D0	-0.900372	0.392844	-2.29193	0	NA	NA	NA	0	0	ADML_HUMAN	P35318	FALSE	ADML	ADM
739	Pre_D0_vs_Post_D0	Pre_D0	Post_D0	-0.635836	0.398129	-1.59706	0	NA	NA	NA	0	0	BMP1_HUMAN	P13497	FALSE	BMP1	BMP1
1807	Pre_D0_vs_Post_D0	Pre_D0	Post_D0	-0.385271	0.933222	-0.412839	0	NA	NA	NA	0	0	DNPEP_HUMAN	Q9ULA0	FALSE	DNPEP	DNPEP
5599	Pre_D0_vs_Post_D0	Pre_D0	Post_D0	-0.260174	2.19953	-0.118287	0	NA	NA	NA	0	0	S10A7_HUMAN	P31151	FALSE	S10A7	S100A7
679	Pre_D0_vs_Post_D0	Pre_D0	Post_D0	-0.225553	0.10104	-2.23232	0	NA	NA	NA	0	0	BGAL_HUMAN	P16278	FALSE	BGAL	GLB1
151	Pre_D0_vs_Post_D0	Pre_D0	Post_D0	-0.160881	0.654173	-0.245931	0	NA	NA	NA	0	0	ACPH_HUMAN	P13798	FALSE	ACPH	APEH
5155	Pre_D0_vs_Post_D0	Pre_D0	Post_D0	-0.116429	0.220174	-0.528806	0	NA	NA	NA	0	0	PSB8_HUMAN	P28062	FALSE	PSB8	PSMB8
4579	Pre_D0_vs_Post_D0	Pre_D0	Post_D0	-0.011348	1.92034	-0.0059094	0	NA	NA	NA	0	0	PDLI4_HUMAN	P50479	FALSE	PDLI4	PDLIM4
5227	Pre_D0_vs_Post_D0	Pre_D0	Post_D0	0.144547	0.329205	0.439078	0	NA	NA	NA	0	0	PUR9_HUMAN	P31939	FALSE	PUR9	ATIC
19	Pre_D0_vs_Post_D0	Pre_D0	Post_D0	0.159612	0.570667	0.279694	0	NA	NA	NA	0	0	1433F_HUMAN	Q04917	FALSE	1433F	YWHAH
5815	Pre_D0_vs_Post_D0	Pre_D0	Post_D0	0.288101	1.50896	0.190927	0	NA	NA	NA	0	0	SFRP4_HUMAN	Q6FHJ7	FALSE	SFRP4	SFRP4
3811	Pre_D0_vs_Post_D0	Pre_D0	Post_D0	0.338915	0.687585	0.492906	0	NA	NA	NA	0	0	LIMA1_HUMAN	Q9UHB6	FALSE	LIMA1	LIMA1
559	Pre_D0_vs_Post_D0	Pre_D0	Post_D0	0.416354	0.860424	0.483894	0	NA	NA	NA	0	0	APT_HUMAN	P07741	FALSE	APT	APRT
3223	Pre_D0_vs_Post_D0	Pre_D0	Post_D0	0.43855	0.123233	3.55871	0	NA	NA	NA	0	0	JUPI1_HUMAN	Q9UK76	FALSE	JUPI1	JPT1
3175	Pre_D0_vs_Post_D0	Pre_D0	Post_D0	0.580327	0.689695	0.841426	0	NA	NA	NA	0	0	ISG15_HUMAN	P05161	FALSE	ISG15	ISG15
5335	Pre_D0_vs_Post_D0	Pre_D0	Post_D0	0.582785	1.07841	0.540412	0	NA	NA	NA	0	0	RHG01_HUMAN	Q07960	FALSE	RHG01	ARHGAP1
2479	Pre_D0_vs_Post_D0	Pre_D0	Post_D0	0.603688	0.226622	2.66386	15	0.0176943	0.993021	NA	0	0	GDIB_HUMAN	P50395	FALSE	GDIB	GDI2
4123	Pre_D0_vs_Post_D0	Pre_D0	Post_D0	0.635813	0.556165	1.14321	0	NA	NA	NA	0	0	MXRA5_HUMAN	Q9NR99	FALSE	MXRA5	MXRA5
3043	Pre_D0_vs_Post_D0	Pre_D0	Post_D0	0.638253	1.72997	0.368938	0	NA	NA	NA	0	0	ICAM1_HUMAN	P05362	FALSE	ICAM1	ICAM1
3847	Pre_D0_vs_Post_D0	Pre_D0	Post_D0	0.674126	0.718155	0.938692	0	NA	NA	NA	0	0	LMNB1_HUMAN	P20700	FALSE	LMNB1	LMNB1
5611	Pre_D0_vs_Post_D0	Pre_D0	Post_D0	0.685829	1.32418	0.517926	0	NA	NA	NA	0	0	S10A8_HUMAN	P05109	FALSE	S10A8	S100A8
5659	Pre_D0_vs_Post_D0	Pre_D0	Post_D0	0.706049	0.776376	0.909416	0	NA	NA	NA	0	0	S10AG_HUMAN	Q96FQ6	FALSE	S10AG	S100A16
3955	Pre_D0_vs_Post_D0	Pre_D0	Post_D0	0.83444	0.809532	1.03077	0	NA	NA	NA	0	0	LYPA1_HUMAN	O75608	FALSE	LYPA1	LYPLA1
6607	Pre_D0_vs_Post_D0	Pre_D0	Post_D0	0.866662	0.331729	2.61256	16	0.0188534	0.993021	NA	0	0	TRFL_HUMAN;cRAP-TRFL_HUMAN	P02788;cRAP-P02788	FALSE	TRFL	LTF
5695	Pre_D0_vs_Post_D0	Pre_D0	Post_D0	0.869024	0.66453	1.30773	0	NA	NA	NA	0	0	SARNP_HUMAN	P82979	FALSE	SARNP	SARNP
1771	Pre_D0_vs_Post_D0	Pre_D0	Post_D0	0.943201	0.414967	2.27295	16	0.0371667	0.993021	NA	0	0	DEST_HUMAN	P60981	FALSE	DEST	DSTN
4219	Pre_D0_vs_Post_D0	Pre_D0	Post_D0	0.990055	1.22496	0.808237	0	NA	NA	NA	0	0	NDRG1_HUMAN	Q92597	FALSE	NDRG1	NDRG1
427	Pre_D0_vs_Post_D0	Pre_D0	Post_D0	1.01655	0.380085	2.67452	14	0.0181389	0.993021	NA	0	0	ANXA1_HUMAN	P04083	FALSE	ANXA1	ANXA1
4339	Pre_D0_vs_Post_D0	Pre_D0	Post_D0	1.15913	1.75936	0.658833	0	NA	NA	NA	0	0	NRDC_HUMAN	O43847	FALSE	NRDC	NRDC
2239	Pre_D0_vs_Post_D0	Pre_D0	Post_D0	2.10442	4.29192	0.490322	0	NA	NA	NA	0	0	FHL3_HUMAN	Q13643	FALSE	FHL3	FHL3
4423	Pre_D0_vs_Post_D0	Pre_D0	Post_D0	4.2908	1.82204	2.35494	0	NA	NA	NA	0	0	PA2GA_HUMAN	P14555	FALSE	PA2GA	PLA2G2A
3583	Pre_D0_vs_Post_D0	Pre_D0	Post_D0	(-Inf)	NA	NA	NA	0	0	oneConditionMissing	0.853659	0	KLK7_HUMAN	P49862	FALSE	KLK7	KLK7
6595	Pre_D0_vs_Post_D0	Pre_D0	Post_D0	(-Inf)	NA	NA	NA	0	0	oneConditionMissing	0.80303	0	TRFE_HUMAN;cRAP-TRFE_HUMAN	P02787;cRAP-P02787	FALSE	TRFE	TF
1975	Pre_D0_vs_Post_D0	Pre_D0	Post_D0	Inf	NA	NA	NA	0	0	oneConditionMissing	0.526316	0	EFNMT_HUMAN	Q8N6R0	FALSE	EFNMT	METTL13
2599	Pre_D0_vs_Post_D0	Pre_D0	Post_D0	Inf	NA	NA	NA	0	0	oneConditionMissing	0.526316	0	GPX1_HUMAN	P07203	FALSE	GPX1	GPX1
3211	Pre_D0_vs_Post_D0	Pre_D0	Post_D0	Inf	NA	NA	NA	0	0	oneConditionMissing	0.520833	0	ITIH2_HUMAN	P19823	FALSE	ITIH2	ITIH2
4375	Pre_D0_vs_Post_D0	Pre_D0	Post_D0	Inf	NA	NA	NA	0	0	oneConditionMissing	0.78125	0	NUDC_HUMAN	Q9Y266	FALSE	NUDC	NUDC
6943	Pre_D0_vs_Post_D0	Pre_D0	Post_D0	Inf	NA	NA	NA	0	0	oneConditionMissing	0.75	0	WFD12_HUMAN	Q8WWY7	FALSE	WFD12	WFDC12
20	Pre_D7_CC_vs_Post_D7_CC	Pre_D7_CC	Post_D7_CC	Inf	NA	NA	NA	0	0	oneConditionMissing	0.806452	0	1433F_HUMAN	Q04917	FALSE	1433F	YWHAH
152	Pre_D7_CC_vs_Post_D7_CC	Pre_D7_CC	Post_D7_CC	-1.66646	1.13306	-1.47076	0	NA	NA	NA	0	0	ACPH_HUMAN	P13798	FALSE	ACPH	APEH
224	Pre_D7_CC_vs_Post_D7_CC	Pre_D7_CC	Post_D7_CC	Inf	NA	NA	NA	0	0	oneConditionMissing	0.769231	0	ADML_HUMAN	P35318	FALSE	ADML	ADM
320	Pre_D7_CC_vs_Post_D7_CC	Pre_D7_CC	Post_D7_CC	Inf	NA	NA	NA	0	0	oneConditionMissing	0.8	0	AK1C1_HUMAN;AK1C3_HUMAN	P42330;Q04828	FALSE	AK1C1	AKR1C1
332	Pre_D7_CC_vs_Post_D7_CC	Pre_D7_CC	Post_D7_CC	Inf	NA	NA	NA	0	0	oneConditionMissing	0.811966	0	AKA12_HUMAN	Q02952	FALSE	AKA12	AKAP12
560	Pre_D7_CC_vs_Post_D7_CC	Pre_D7_CC	Post_D7_CC	Inf	NA	NA	NA	0	0	oneConditionMissing	0.909091	0	APT_HUMAN	P07741	FALSE	APT	APRT
632	Pre_D7_CC_vs_Post_D7_CC	Pre_D7_CC	Post_D7_CC	(-Inf)	NA	NA	NA	0	0	oneConditionMissing	0.76087	0	AT1A1_HUMAN	P05023	FALSE	AT1A1	ATP1A1
680	Pre_D7_CC_vs_Post_D7_CC	Pre_D7_CC	Post_D7_CC	-0.206585	0.157465	-1.31194	0	NA	NA	NA	0	0	BGAL_HUMAN	P16278	FALSE	BGAL	GLB1
740	Pre_D7_CC_vs_Post_D7_CC	Pre_D7_CC	Post_D7_CC	-0.359705	0.650141	-0.553272	0	NA	NA	NA	0	0	BMP1_HUMAN	P13497	FALSE	BMP1	BMP1
764	Pre_D7_CC_vs_Post_D7_CC	Pre_D7_CC	Post_D7_CC	1.61107	0.736537	2.18736	14	0.0461804	0.992235	NA	0	0	C1S_HUMAN	P09871	FALSE	C1S	C1S
1016	Pre_D7_CC_vs_Post_D7_CC	Pre_D7_CC	Post_D7_CC	3.16355	1.2143	2.60525	7	0.0351554	0.992235	NA	0	0	CBR1_HUMAN	P16152	FALSE	CBR1	CBR1
1040	Pre_D7_CC_vs_Post_D7_CC	Pre_D7_CC	Post_D7_CC	Inf	NA	NA	NA	0	0	oneConditionMissing	0.714286	0	CD248_HUMAN	Q9HCU0	FALSE	CD248	CD248
1676	Pre_D7_CC_vs_Post_D7_CC	Pre_D7_CC	Post_D7_CC	(-Inf)	NA	NA	NA	0	0	oneConditionMissing	0.530303	0	DCTN2_HUMAN	Q13561	FALSE	DCTN2	DCTN2
1784	Pre_D7_CC_vs_Post_D7_CC	Pre_D7_CC	Post_D7_CC	Inf	NA	NA	NA	0	0	oneConditionMissing	0.957447	0	DHB4_HUMAN	P51659	FALSE	DHB4	HSD17B4
1796	Pre_D7_CC_vs_Post_D7_CC	Pre_D7_CC	Post_D7_CC	(-Inf)	NA	NA	NA	0	0	oneConditionMissing	0.900901	0	DHX9_HUMAN	Q08211	FALSE	DHX9	DHX9
1808	Pre_D7_CC_vs_Post_D7_CC	Pre_D7_CC	Post_D7_CC	(-Inf)	NA	NA	NA	0	0	oneConditionMissing	0.803571	0	DNPEP_HUMAN	Q9ULA0	FALSE	DNPEP	DNPEP
2240	Pre_D7_CC_vs_Post_D7_CC	Pre_D7_CC	Post_D7_CC	Inf	NA	NA	NA	0	0	oneConditionMissing	0.76087	0	FHL3_HUMAN	Q13643	FALSE	FHL3	FHL3
2708	Pre_D7_CC_vs_Post_D7_CC	Pre_D7_CC	Post_D7_CC	Inf	NA	NA	NA	0	0	oneConditionMissing	0.698925	0	HBA_HUMAN;cRAP-HBA_HUMAN	P69905;cRAP-P69905	FALSE	HBA	HBA1; HBA2
2780	Pre_D7_CC_vs_Post_D7_CC	Pre_D7_CC	Post_D7_CC	-1.12699	0.436339	-2.58284	11	0.0254611	0.992235	NA	0	0	HNRH2_HUMAN	P55795	FALSE	HNRH2	HNRNPH2
2936	Pre_D7_CC_vs_Post_D7_CC	Pre_D7_CC	Post_D7_CC	(-Inf)	NA	NA	NA	0	0	oneConditionMissing	0.744681	0	HXK1_HUMAN	P19367	FALSE	HXK1	HK1
3044	Pre_D7_CC_vs_Post_D7_CC	Pre_D7_CC	Post_D7_CC	Inf	NA	NA	NA	0	0	oneConditionMissing	0.696203	0	ICAM1_HUMAN	P05362	FALSE	ICAM1	ICAM1
3176	Pre_D7_CC_vs_Post_D7_CC	Pre_D7_CC	Post_D7_CC	1.23885	0.925323	1.33884	0	NA	NA	NA	0	0	ISG15_HUMAN	P05161	FALSE	ISG15	ISG15
3632	Pre_D7_CC_vs_Post_D7_CC	Pre_D7_CC	Post_D7_CC	(-Inf)	NA	NA	NA	0	0	oneConditionMissing	0.803571	0	KTN1_HUMAN	Q86UP2	FALSE	KTN1	KTN1
3956	Pre_D7_CC_vs_Post_D7_CC	Pre_D7_CC	Post_D7_CC	Inf	NA	NA	NA	0	0	oneConditionMissing	0.6	0	LYPA1_HUMAN	O75608	FALSE	LYPA1	LYPLA1
3980	Pre_D7_CC_vs_Post_D7_CC	Pre_D7_CC	Post_D7_CC	(-Inf)	NA	NA	NA	0	0	oneConditionMissing	0.694444	0	MACF1_HUMAN	Q9UPN3	FALSE	MACF1	MACF1
4052	Pre_D7_CC_vs_Post_D7_CC	Pre_D7_CC	Post_D7_CC	Inf	NA	NA	NA	0	0	oneConditionMissing	0.876289	0	MK01_HUMAN	P28482	FALSE	MK01	MAPK1
4124	Pre_D7_CC_vs_Post_D7_CC	Pre_D7_CC	Post_D7_CC	-0.455814	0.521219	-0.874516	0	NA	NA	NA	0	0	MXRA5_HUMAN	Q9NR99	FALSE	MXRA5	MXRA5
4184	Pre_D7_CC_vs_Post_D7_CC	Pre_D7_CC	Post_D7_CC	(-Inf)	NA	NA	NA	0	0	oneConditionMissing	0.6	0	MYPT1_HUMAN	O14974	FALSE	MYPT1	PPP1R12A
4292	Pre_D7_CC_vs_Post_D7_CC	Pre_D7_CC	Post_D7_CC	Inf	NA	NA	NA	0	0	oneConditionMissing	0.833333	0	NNMT_HUMAN	P40261	FALSE	NNMT	NNMT
4340	Pre_D7_CC_vs_Post_D7_CC	Pre_D7_CC	Post_D7_CC	Inf	NA	NA	NA	0	0	oneConditionMissing	0.686275	0	NRDC_HUMAN	O43847	FALSE	NRDC	NRDC
4376	Pre_D7_CC_vs_Post_D7_CC	Pre_D7_CC	Post_D7_CC	Inf	NA	NA	NA	0	0	oneConditionMissing	0.78125	0	NUDC_HUMAN	Q9Y266	FALSE	NUDC	NUDC
4400	Pre_D7_CC_vs_Post_D7_CC	Pre_D7_CC	Post_D7_CC	Inf	NA	NA	NA	0	0	oneConditionMissing	0.638298	0	P4HA1_HUMAN	P13674	FALSE	P4HA1	P4HA1
4424	Pre_D7_CC_vs_Post_D7_CC	Pre_D7_CC	Post_D7_CC	Inf	NA	NA	NA	0	0	oneConditionMissing	0.806452	0	PA2GA_HUMAN	P14555	FALSE	PA2GA	PLA2G2A
4508	Pre_D7_CC_vs_Post_D7_CC	Pre_D7_CC	Post_D7_CC	Inf	NA	NA	NA	0	0	oneConditionMissing	0.686275	0	PDC6I_HUMAN	Q8WUM4	FALSE	PDC6I	PDCD6IP
4640	Pre_D7_CC_vs_Post_D7_CC	Pre_D7_CC	Post_D7_CC	(-Inf)	NA	NA	NA	0	0	oneConditionMissing	0.507246	0	PEPD_HUMAN	P12955	FALSE	PEPD	PEPD
4796	Pre_D7_CC_vs_Post_D7_CC	Pre_D7_CC	Post_D7_CC	(-Inf)	NA	NA	NA	0	0	oneConditionMissing	0.769231	0	PLIN3_HUMAN	O60664	FALSE	PLIN3	PLIN3
5012	Pre_D7_CC_vs_Post_D7_CC	Pre_D7_CC	Post_D7_CC	4.41862	0.831506	5.31399	2	0.0336361	0.992235	NA	0	0	PRIO_HUMAN	P04156	FALSE	PRIO	PRNP
5144	Pre_D7_CC_vs_Post_D7_CC	Pre_D7_CC	Post_D7_CC	(-Inf)	NA	NA	NA	0	0	oneConditionMissing	0.772358	0	PSB6_HUMAN	P28072	FALSE	PSB6	PSMB6
5228	Pre_D7_CC_vs_Post_D7_CC	Pre_D7_CC	Post_D7_CC	-0.484895	0.465105	-1.04255	0	NA	NA	NA	0	0	PUR9_HUMAN	P31939	FALSE	PUR9	ATIC
5336	Pre_D7_CC_vs_Post_D7_CC	Pre_D7_CC	Post_D7_CC	-0.824239	1.29945	-0.6343	0	NA	NA	NA	0	0	RHG01_HUMAN	Q07960	FALSE	RHG01	ARHGAP1
5600	Pre_D7_CC_vs_Post_D7_CC	Pre_D7_CC	Post_D7_CC	0.53409	2.40946	0.221664	0	NA	NA	NA	0	0	S10A7_HUMAN	P31151	FALSE	S10A7	S100A7
5612	Pre_D7_CC_vs_Post_D7_CC	Pre_D7_CC	Post_D7_CC	Inf	NA	NA	NA	0	0	oneConditionMissing	0.595238	0	S10A8_HUMAN	P05109	FALSE	S10A8	S100A8
5696	Pre_D7_CC_vs_Post_D7_CC	Pre_D7_CC	Post_D7_CC	(-Inf)	NA	NA	NA	0	0	oneConditionMissing	0.689655	0	SARNP_HUMAN	P82979	FALSE	SARNP	SARNP
5708	Pre_D7_CC_vs_Post_D7_CC	Pre_D7_CC	Post_D7_CC	-0.204526	1.30382	-0.156866	0	NA	NA	NA	0	0	SBSN_HUMAN	Q6UWP8	FALSE	SBSN	SBSN
5768	Pre_D7_CC_vs_Post_D7_CC	Pre_D7_CC	Post_D7_CC	Inf	NA	NA	NA	0	0	oneConditionMissing	0.8	0	SEPT9_HUMAN	Q9UHD8	FALSE	2025-09-09	SEPTIN9
5816	Pre_D7_CC_vs_Post_D7_CC	Pre_D7_CC	Post_D7_CC	Inf	NA	NA	NA	0	0	oneConditionMissing	0.806452	0	SFRP4_HUMAN	Q6FHJ7	FALSE	SFRP4	SFRP4
5828	Pre_D7_CC_vs_Post_D7_CC	Pre_D7_CC	Post_D7_CC	(-Inf)	NA	NA	NA	0	0	oneConditionMissing	0.757576	0	SIAS_HUMAN	Q9NR45	FALSE	SIAS	NANS
5840	Pre_D7_CC_vs_Post_D7_CC	Pre_D7_CC	Post_D7_CC	(-Inf)	NA	NA	NA	0	0	oneConditionMissing	0.75	0	SIL1_HUMAN	Q9H173	FALSE	SIL1	SIL1
6188	Pre_D7_CC_vs_Post_D7_CC	Pre_D7_CC	Post_D7_CC	(-Inf)	NA	NA	NA	0	0	oneConditionMissing	0.882353	0	SYRC_HUMAN	P54136	FALSE	SYRC	RARS1
6332	Pre_D7_CC_vs_Post_D7_CC	Pre_D7_CC	Post_D7_CC	(-Inf)	NA	NA	NA	0	0	oneConditionMissing	0.706522	0	TCPD_HUMAN	P50991	FALSE	TCPD	CCT4
6392	Pre_D7_CC_vs_Post_D7_CC	Pre_D7_CC	Post_D7_CC	Inf	NA	NA	NA	0	0	oneConditionMissing	0.833333	0	TENA_HUMAN	P24821	FALSE	TENA	TNC
6404	Pre_D7_CC_vs_Post_D7_CC	Pre_D7_CC	Post_D7_CC	(-Inf)	NA	NA	NA	0	0	oneConditionMissing	0.7	0	TFG_HUMAN	Q92734	FALSE	TFG	TFG
6464	Pre_D7_CC_vs_Post_D7_CC	Pre_D7_CC	Post_D7_CC	-5.92858	0.269065	-22.034	3	0.00020464	0.0898348	NA	0	0	THOC4_HUMAN	Q86V81	FALSE	THOC4	ALYREF
6476	Pre_D7_CC_vs_Post_D7_CC	Pre_D7_CC	Post_D7_CC	Inf	NA	NA	NA	0	0	oneConditionMissing	0.864198	0	TIG1_HUMAN	P49788	FALSE	TIG1	RARRES1
6680	Pre_D7_CC_vs_Post_D7_CC	Pre_D7_CC	Post_D7_CC	Inf	NA	NA	NA	0	0	oneConditionMissing	0.810811	0	TWF1_HUMAN	Q12792	FALSE	TWF1	TWF1
6944	Pre_D7_CC_vs_Post_D7_CC	Pre_D7_CC	Post_D7_CC	(-Inf)	NA	NA	NA	0	0	oneConditionMissing	0.566038	0	WFD12_HUMAN	Q8WWY7	FALSE	WFD12	WFDC12
220	Pre_D7_CC_vs_Pre_D0	Pre_D7_CC	Pre_D0	-1.28985	0.00283229	-455.41	0	NA	NA	NA	0	0	ADML_HUMAN	P35318	FALSE	ADML	ADM
221	Pre_D7_CM_vs_Pre_D0	Pre_D7_CM	Pre_D0	-0.570678	0.00200273	-284.95	0	NA	NA	NA	0	0	ADML_HUMAN	P35318	FALSE	ADML	ADM
232	Pre_D7_CC_vs_Pre_D0	Pre_D7_CC	Pre_D0	(-Inf)	NA	NA	NA	0	0	oneConditionMissing	0.757576	0	ADRM1_HUMAN	Q16186	FALSE	ADRM1	ADRM1
256	Pre_D7_CC_vs_Pre_D0	Pre_D7_CC	Pre_D0	-0.874649	0.346918	-2.5212	10	0.0303251	0.327191	NA	0	0	AEBP1_HUMAN	Q8IUX7	FALSE	AEBP1	AEBP1
6460	Pre_D7_CC_vs_Pre_D0	Pre_D7_CC	Pre_D0	-6.10625	0.120524	-50.6643	3	1.6934e-05	0.00763719	NA	0	0	THOC4_HUMAN	Q86V81	FALSE	THOC4	ALYREF
6461	Pre_D7_CM_vs_Pre_D0	Pre_D7_CM	Pre_D0	0.274213	0.0699636	3.91936	3	0.0295378	0.689708	NA	0	0	THOC4_HUMAN	Q86V81	FALSE	THOC4	ALYREF
400	Pre_D7_CC_vs_Pre_D0	Pre_D7_CC	Pre_D0	-0.983095	0.440594	-2.23129	12	0.0455046	0.361704	NA	0	0	AN32A_HUMAN	P39687	FALSE	AN32A	ANP32A
424	Pre_D7_CC_vs_Pre_D0	Pre_D7_CC	Pre_D0	-0.947641	0.323445	-2.92983	14	0.0109752	0.309364	NA	0	0	ANXA1_HUMAN	P04083	FALSE	ANXA1	ANXA1
448	Pre_D7_CC_vs_Pre_D0	Pre_D7_CC	Pre_D0	-1.00056	0.26818	-3.73093	4	0.0202805	0.327191	NA	0	0	ANXA4_HUMAN	P09525	FALSE	ANXA4	ANXA4
449	Pre_D7_CM_vs_Pre_D0	Pre_D7_CM	Pre_D0	-0.770361	0.275968	-2.79149	4	0.0492373	0.811769	NA	0	0	ANXA4_HUMAN	P09525	FALSE	ANXA4	ANXA4
473	Pre_D7_CM_vs_Pre_D0	Pre_D7_CM	Pre_D0	-1.22008	0.492068	-2.4795	12	0.0289849	0.689708	NA	0	0	ANXA6_HUMAN	P08133	FALSE	ANXA6	ANXA6
148	Pre_D7_CC_vs_Pre_D0	Pre_D7_CC	Pre_D0	-0.946502	0.92514	-1.02309	0	NA	NA	NA	0	0	ACPH_HUMAN	P13798	FALSE	ACPH	APEH
149	Pre_D7_CM_vs_Pre_D0	Pre_D7_CM	Pre_D0	-0.0244205	0.654173	-0.0373304	0	NA	NA	NA	0	0	ACPH_HUMAN	P13798	FALSE	ACPH	APEH
556	Pre_D7_CC_vs_Pre_D0	Pre_D7_CC	Pre_D0	-0.520804	1.21682	-0.428006	0	NA	NA	NA	0	0	APT_HUMAN	P07741	FALSE	APT	APRT
557	Pre_D7_CM_vs_Pre_D0	Pre_D7_CM	Pre_D0	-0.778794	0.00358701	-217.115	0	NA	NA	NA	0	0	APT_HUMAN	P07741	FALSE	APT	APRT
5332	Pre_D7_CC_vs_Pre_D0	Pre_D7_CC	Pre_D0	-0.565946	1.25571	-0.450699	0	NA	NA	NA	0	0	RHG01_HUMAN	Q07960	FALSE	RHG01	ARHGAP1
5333	Pre_D7_CM_vs_Pre_D0	Pre_D7_CM	Pre_D0	-0.0593775	0.944227	-0.0628848	0	NA	NA	NA	0	0	RHG01_HUMAN	Q07960	FALSE	RHG01	ARHGAP1
2488	Pre_D7_CC_vs_Pre_D0	Pre_D7_CC	Pre_D0	-1.20046	0.23666	-5.07251	12	0.00027405	0.0587224	NA	0	0	GDIR1_HUMAN	P52565	FALSE	GDIR1	ARHGDIA
2489	Pre_D7_CM_vs_Pre_D0	Pre_D7_CM	Pre_D0	-0.633161	0.255451	-2.4786	12	0.0290322	0.689708	NA	0	0	GDIR1_HUMAN	P52565	FALSE	GDIR1	ARHGDIA
5224	Pre_D7_CC_vs_Pre_D0	Pre_D7_CC	Pre_D0	-1.14749	0.405374	-2.8307	0	NA	NA	NA	0	0	PUR9_HUMAN	P31939	FALSE	PUR9	ATIC
5225	Pre_D7_CM_vs_Pre_D0	Pre_D7_CM	Pre_D0	-0.130397	0.309993	-0.420646	0	NA	NA	NA	0	0	PUR9_HUMAN	P31939	FALSE	PUR9	ATIC
628	Pre_D7_CC_vs_Pre_D0	Pre_D7_CC	Pre_D0	(-Inf)	NA	NA	NA	0	0	oneConditionMissing	0.614035	0	AT1A1_HUMAN	P05023	FALSE	AT1A1	ATP1A1
652	Pre_D7_CC_vs_Pre_D0	Pre_D7_CC	Pre_D0	-1.64758	0.504376	-3.26657	15	0.00520359	0.20463	NA	0	0	B2MG_HUMAN;cRAP-B2MG_HUMAN	P61769;cRAP-P61769	FALSE	B2MG	B2M
700	Pre_D7_CC_vs_Pre_D0	Pre_D7_CC	Pre_D0	-4.52586	1.3872	-3.26259	4	0.0310049	0.327191	NA	0	0	BIEA_HUMAN	P53004	FALSE	BIEA	BLVRA
736	Pre_D7_CC_vs_Pre_D0	Pre_D7_CC	Pre_D0	-0.125836	0.00106428	-118.235	0	NA	NA	NA	0	0	BMP1_HUMAN	P13497	FALSE	BMP1	BMP1
737	Pre_D7_CM_vs_Pre_D0	Pre_D7_CM	Pre_D0	0.351267	0.00106428	330.051	0	NA	NA	NA	0	0	BMP1_HUMAN	P13497	FALSE	BMP1	BMP1
1361	Pre_D7_CM_vs_Pre_D0	Pre_D7_CM	Pre_D0	2.40069	0.531109	4.52014	2	0.0456205	0.811769	NA	0	0	CO7_HUMAN	P10643	FALSE	CO7	C7
6328	Pre_D7_CC_vs_Pre_D0	Pre_D7_CC	Pre_D0	(-Inf)	NA	NA	NA	0	0	oneConditionMissing	0.548523	0	TCPD_HUMAN	P50991	FALSE	TCPD	CCT4
1432	Pre_D7_CC_vs_Pre_D0	Pre_D7_CC	Pre_D0	-1.30386	0.232324	-5.61224	7	0.00080557	0.0908284	NA	0	0	COR1B_HUMAN	Q9BR76	FALSE	COR1B	CORO1B
1672	Pre_D7_CC_vs_Pre_D0	Pre_D7_CC	Pre_D0	(-Inf)	NA	NA	NA	0	0	oneConditionMissing	0.522388	0	DCTN2_HUMAN	Q13561	FALSE	DCTN2	DCTN2
1696	Pre_D7_CC_vs_Pre_D0	Pre_D7_CC	Pre_D0	-0.704612	0.222854	-3.16177	4	0.0341261	0.327191	NA	0	0	DDTL_HUMAN;DOPD_HUMAN	A6NHG4;P30046	FALSE	DDTL	DDTL
1708	Pre_D7_CC_vs_Pre_D0	Pre_D7_CC	Pre_D0	-2.83228	1.12954	-2.50747	6	0.0460607	0.361704	NA	0	0	DDX3X_HUMAN	O00571	FALSE	DDX3X	DDX3X
1720	Pre_D7_CC_vs_Pre_D0	Pre_D7_CC	Pre_D0	-1.01375	0.241691	-4.1944	12	0.00124423	0.104303	NA	0	0	DDX5_HUMAN	P17844	FALSE	DDX5	DDX5
1721	Pre_D7_CM_vs_Pre_D0	Pre_D7_CM	Pre_D0	-0.58573	0.261665	-2.23847	12	0.0449203	0.811769	NA	0	0	DDX5_HUMAN	P17844	FALSE	DDX5	DDX5
1792	Pre_D7_CC_vs_Pre_D0	Pre_D7_CC	Pre_D0	(-Inf)	NA	NA	NA	0	0	oneConditionMissing	0.510204	0	DHX9_HUMAN	Q08211	FALSE	DHX9	DHX9
1804	Pre_D7_CC_vs_Pre_D0	Pre_D7_CC	Pre_D0	(-Inf)	NA	NA	NA	0	0	oneConditionMissing	0.576923	0	DNPEP_HUMAN	Q9ULA0	FALSE	DNPEP	DNPEP
1805	Pre_D7_CM_vs_Pre_D0	Pre_D7_CM	Pre_D0	0.049005	0.939791	0.0521445	0	NA	NA	NA	0	0	DNPEP_HUMAN	Q9ULA0	FALSE	DNPEP	DNPEP
1840	Pre_D7_CC_vs_Pre_D0	Pre_D7_CC	Pre_D0	-0.969182	0.370976	-2.61252	13	0.0214894	0.327191	NA	0	0	DPYL3_HUMAN	Q14195	FALSE	DPYL3	DPYSL3
1768	Pre_D7_CC_vs_Pre_D0	Pre_D7_CC	Pre_D0	-0.745388	0.212382	-3.50966	16	0.00290372	0.147021	NA	0	0	DEST_HUMAN	P60981	FALSE	DEST	DSTN
1769	Pre_D7_CM_vs_Pre_D0	Pre_D7_CM	Pre_D0	-0.834404	0.212382	-3.92879	16	0.00119884	0.298578	NA	0	0	DEST_HUMAN	P60981	FALSE	DEST	DSTN
1913	Pre_D7_CM_vs_Pre_D0	Pre_D7_CM	Pre_D0	2.45889	0.756647	3.24971	9	0.010002	0.533403	NA	0	0	ECM1_HUMAN	Q16610	FALSE	ECM1	ECM1
3100	Pre_D7_CC_vs_Pre_D0	Pre_D7_CC	Pre_D0	-2.41087	0.96758	-2.49165	10	0.0318998	0.327191	NA	0	0	IF6_HUMAN	P56537	FALSE	IF6	EIF6
2092	Pre_D7_CC_vs_Pre_D0	Pre_D7_CC	Pre_D0	-0.535197	0.247834	-2.1595	16	0.0463366	0.361704	NA	0	0	EZRI_HUMAN	P15311	FALSE	EZRI	EZR
2224	Pre_D7_CC_vs_Pre_D0	Pre_D7_CC	Pre_D0	-0.801818	0.341512	-2.34785	11	0.0386337	0.335073	NA	0	0	FHL2_HUMAN	Q14192	FALSE	FHL2	FHL2
2225	Pre_D7_CM_vs_Pre_D0	Pre_D7_CM	Pre_D0	-1.03023	0.341512	-3.01666	11	0.0117254	0.533403	NA	0	0	FHL2_HUMAN	Q14192	FALSE	FHL2	FHL2
2236	Pre_D7_CC_vs_Pre_D0	Pre_D7_CC	Pre_D0	0.380468	5.25651	0.0723803	0	NA	NA	NA	0	0	FHL3_HUMAN	Q13643	FALSE	FHL3	FHL3
2237	Pre_D7_CM_vs_Pre_D0	Pre_D7_CM	Pre_D0	(-Inf)	NA	NA	NA	0	0	oneConditionMissing	0.76087	0	FHL3_HUMAN	Q13643	FALSE	FHL3	FHL3
2368	Pre_D7_CC_vs_Pre_D0	Pre_D7_CC	Pre_D0	-0.891235	0.196292	-4.54036	15	0.00039061	0.0587224	NA	0	0	FSCN1_HUMAN	Q16658	FALSE	FSCN1	FSCN1
2369	Pre_D7_CM_vs_Pre_D0	Pre_D7_CM	Pre_D0	-0.694685	0.181154	-3.83478	15	0.00162361	0.298578	NA	0	0	FSCN1_HUMAN	Q16658	FALSE	FSCN1	FSCN1
2345	Pre_D7_CM_vs_Pre_D0	Pre_D7_CM	Pre_D0	0.834364	0.334991	2.4907	13	0.0270588	0.689708	NA	0	0	FRIH_HUMAN	P02794	FALSE	FRIH	FTH1
2476	Pre_D7_CC_vs_Pre_D0	Pre_D7_CC	Pre_D0	-0.642117	0.197911	-3.24447	15	0.00544469	0.20463	NA	0	0	GDIB_HUMAN	P50395	FALSE	GDIB	GDI2
676	Pre_D7_CC_vs_Pre_D0	Pre_D7_CC	Pre_D0	-0.612169	0.062869	-9.73722	0	NA	NA	NA	0	0	BGAL_HUMAN	P16278	FALSE	BGAL	GLB1
677	Pre_D7_CM_vs_Pre_D0	Pre_D7_CM	Pre_D0	-0.0445878	0.147907	-0.301458	0	NA	NA	NA	0	0	BGAL_HUMAN	P16278	FALSE	BGAL	GLB1
2428	Pre_D7_CC_vs_Pre_D0	Pre_D7_CC	Pre_D0	-0.611873	0.170254	-3.59388	14	0.00293391	0.147021	NA	0	0	G6PI_HUMAN	P06744	FALSE	G6PI	GPI
2512	Pre_D7_CC_vs_Pre_D0	Pre_D7_CC	Pre_D0	-0.683038	0.279131	-2.44701	15	0.0272006	0.327191	NA	0	0	GELS_HUMAN;cRAP-GELS_HUMAN	P06396;cRAP-P06396	FALSE	GELS	GSN
2680	Pre_D7_CC_vs_Pre_D0	Pre_D7_CC	Pre_D0	-1.62115	0.672847	-2.40938	14	0.0303188	0.327191	NA	0	0	H37_HUMAN	Q5TEC6	FALSE	H37	H3-7
2716	Pre_D7_CC_vs_Pre_D0	Pre_D7_CC	Pre_D0	-1.71257	0.479055	-3.5749	16	0.00252986	0.147021	NA	0	0	HBB_HUMAN;cRAP-HBB_HUMAN	P68871;cRAP-P68871	FALSE	HBB	HBB
2717	Pre_D7_CM_vs_Pre_D0	Pre_D7_CM	Pre_D0	-1.40006	0.479055	-2.92254	16	0.00996362	0.533403	NA	0	0	HBB_HUMAN;cRAP-HBB_HUMAN	P68871;cRAP-P68871	FALSE	HBB	HBB
2728	Pre_D7_CC_vs_Pre_D0	Pre_D7_CC	Pre_D0	(-Inf)	NA	NA	NA	0	0	oneConditionMissing	0.510204	0	HDGF_HUMAN	P51858	FALSE	HDGF	HDGF
2932	Pre_D7_CC_vs_Pre_D0	Pre_D7_CC	Pre_D0	(-Inf)	NA	NA	NA	0	0	oneConditionMissing	0.648148	0	HXK1_HUMAN	P19367	FALSE	HXK1	HK1
2752	Pre_D7_CC_vs_Pre_D0	Pre_D7_CC	Pre_D0	-1.08974	0.434196	-2.50979	15	0.0240366	0.327191	NA	0	0	HLAA_HUMAN	P04439	FALSE	HLAA	HLA-A
2764	Pre_D7_CC_vs_Pre_D0	Pre_D7_CC	Pre_D0	-1.16347	0.390419	-2.98004	8	0.0175994	0.327191	NA	0	0	HLAC_HUMAN	P10321	FALSE	HLAC	HLA-C
2776	Pre_D7_CC_vs_Pre_D0	Pre_D7_CC	Pre_D0	-1.40196	0.330609	-4.24054	11	0.00138763	0.104303	NA	0	0	HNRH2_HUMAN	P55795	FALSE	HNRH2	HNRNPH2
2788	Pre_D7_CC_vs_Pre_D0	Pre_D7_CC	Pre_D0	-1.51803	0.464546	-3.26777	6	0.0170817	0.327191	NA	0	0	HNRH3_HUMAN	P31942	FALSE	HNRH3	HNRNPH3
2872	Pre_D7_CC_vs_Pre_D0	Pre_D7_CC	Pre_D0	-0.843672	0.368051	-2.29227	16	0.0357852	0.327191	NA	0	0	HS90A_HUMAN	P07900	FALSE	HS90A	HSP90AA1
3040	Pre_D7_CC_vs_Pre_D0	Pre_D7_CC	Pre_D0	-2.78017	1.72997	-1.60706	0	NA	NA	NA	0	0	ICAM1_HUMAN	P05362	FALSE	ICAM1	ICAM1
3041	Pre_D7_CM_vs_Pre_D0	Pre_D7_CM	Pre_D0	0.727411	2.06747	0.351837	0	NA	NA	NA	0	0	ICAM1_HUMAN	P05362	FALSE	ICAM1	ICAM1
2957	Pre_D7_CM_vs_Pre_D0	Pre_D7_CM	Pre_D0	1.75416	0.646407	2.71372	15	0.0160121	0.575203	NA	0	0	IBP2_HUMAN	P18065	FALSE	IBP2	IGFBP2
2968	Pre_D7_CC_vs_Pre_D0	Pre_D7_CC	Pre_D0	-1.30053	0.424555	-3.06327	16	0.00742968	0.239342	NA	0	0	IBP3_HUMAN	P17936	FALSE	IBP3	IGFBP3
2992	Pre_D7_CC_vs_Pre_D0	Pre_D7_CC	Pre_D0	-0.594073	0.259471	-2.28955	16	0.0359764	0.327191	NA	0	0	IBP5_HUMAN	P24593	FALSE	IBP5	IGFBP5
3172	Pre_D7_CC_vs_Pre_D0	Pre_D7_CC	Pre_D0	-0.963302	0.689695	-1.39671	0	NA	NA	NA	0	0	ISG15_HUMAN	P05161	FALSE	ISG15	ISG15
3173	Pre_D7_CM_vs_Pre_D0	Pre_D7_CM	Pre_D0	-0.375564	0.689695	-0.544537	0	NA	NA	NA	0	0	ISG15_HUMAN	P05161	FALSE	ISG15	ISG15
3208	Pre_D7_CC_vs_Pre_D0	Pre_D7_CC	Pre_D0	3.9106	1.37728	2.83935	5	0.0362739	0.327191	NA	0	0	ITIH2_HUMAN	P19823	FALSE	ITIH2	ITIH2
3220	Pre_D7_CC_vs_Pre_D0	Pre_D7_CC	Pre_D0	(-Inf)	NA	NA	NA	0	0	oneConditionMissing	0.5	0	JUPI1_HUMAN	Q9UK76	FALSE	JUPI1	JPT1
3221	Pre_D7_CM_vs_Pre_D0	Pre_D7_CM	Pre_D0	-0.659545	0.0849656	-7.76249	0	NA	NA	NA	0	0	JUPI1_HUMAN	Q9UK76	FALSE	JUPI1	JPT1
2392	Pre_D7_CC_vs_Pre_D0	Pre_D7_CC	Pre_D0	-0.733333	0.300882	-2.43727	15	0.0277254	0.327191	NA	0	0	FUBP2_HUMAN	Q92945	FALSE	FUBP2	KHSRP
3244	Pre_D7_CC_vs_Pre_D0	Pre_D7_CC	Pre_D0	1.36417	0.513025	2.65908	16	0.0171485	0.327191	NA	0	0	K1C13_HUMAN	P13646	FALSE	K1C13	KRT13
3365	Pre_D7_CM_vs_Pre_D0	Pre_D7_CM	Pre_D0	(-Inf)	NA	NA	NA	0	0	oneConditionMissing	0.75	0	K22O_HUMAN	Q01546	FALSE	K22O	KRT76
3628	Pre_D7_CC_vs_Pre_D0	Pre_D7_CC	Pre_D0	(-Inf)	NA	NA	NA	0	0	oneConditionMissing	0.505618	0	KTN1_HUMAN	Q86UP2	FALSE	KTN1	KTN1
3700	Pre_D7_CC_vs_Pre_D0	Pre_D7_CC	Pre_D0	-0.764625	0.245299	-3.11712	16	0.00663749	0.23027	NA	0	0	LASP1_HUMAN	Q14847	FALSE	LASP1	LASP1
3701	Pre_D7_CM_vs_Pre_D0	Pre_D7_CM	Pre_D0	-0.909068	0.245299	-3.70596	16	0.00191806	0.298578	NA	0	0	LASP1_HUMAN	Q14847	FALSE	LASP1	LASP1
3761	Pre_D7_CM_vs_Pre_D0	Pre_D7_CM	Pre_D0	-1.50862	0.634166	-2.3789	12	0.0348328	0.731191	NA	0	0	LEG3_HUMAN	P17931	FALSE	LEG3	LGALS3
3808	Pre_D7_CC_vs_Pre_D0	Pre_D7_CC	Pre_D0	(-Inf)	NA	NA	NA	0	0	oneConditionMissing	0.6	0	LIMA1_HUMAN	Q9UHB6	FALSE	LIMA1	LIMA1
3809	Pre_D7_CM_vs_Pre_D0	Pre_D7_CM	Pre_D0	-1.29425	0.4446	-2.91105	0	NA	NA	NA	0	0	LIMA1_HUMAN	Q9UHB6	FALSE	LIMA1	LIMA1
3832	Pre_D7_CC_vs_Pre_D0	Pre_D7_CC	Pre_D0	-0.694387	0.292296	-2.37563	16	0.0303542	0.327191	NA	0	0	LMNA_HUMAN	P02545	FALSE	LMNA	LMNA
3844	Pre_D7_CC_vs_Pre_D0	Pre_D7_CC	Pre_D0	(-Inf)	NA	NA	NA	0	0	oneConditionMissing	0.5	0	LMNB1_HUMAN	P20700	FALSE	LMNB1	LMNB1
3845	Pre_D7_CM_vs_Pre_D0	Pre_D7_CM	Pre_D0	(-Inf)	NA	NA	NA	0	0	oneConditionMissing	0.5	0	LMNB1_HUMAN	P20700	FALSE	LMNB1	LMNB1
6604	Pre_D7_CC_vs_Pre_D0	Pre_D7_CC	Pre_D0	-1.08027	0.331729	-3.25649	16	0.00495288	0.20463	NA	0	0	TRFL_HUMAN;cRAP-TRFL_HUMAN	P02788;cRAP-P02788	FALSE	TRFL	LTF
6605	Pre_D7_CM_vs_Pre_D0	Pre_D7_CM	Pre_D0	-1.10561	0.331729	-3.33286	16	0.00421692	0.328217	NA	0	0	TRFL_HUMAN;cRAP-TRFL_HUMAN	P02788;cRAP-P02788	FALSE	TRFL	LTF
3952	Pre_D7_CC_vs_Pre_D0	Pre_D7_CC	Pre_D0	-0.684588	0.00517298	-132.339	0	NA	NA	NA	0	0	LYPA1_HUMAN	O75608	FALSE	LYPA1	LYPLA1
3953	Pre_D7_CM_vs_Pre_D0	Pre_D7_CM	Pre_D0	(-Inf)	NA	NA	NA	0	0	oneConditionMissing	0.6	0	LYPA1_HUMAN	O75608	FALSE	LYPA1	LYPLA1
3976	Pre_D7_CC_vs_Pre_D0	Pre_D7_CC	Pre_D0	(-Inf)	NA	NA	NA	0	0	oneConditionMissing	0.581395	0	MACF1_HUMAN	Q9UPN3	FALSE	MACF1	MACF1
1972	Pre_D7_CC_vs_Pre_D0	Pre_D7_CC	Pre_D0	0.353623	0.0258844	13.6616	1	0.0465162	0.361704	NA	0	0	EFNMT_HUMAN	Q8N6R0	FALSE	EFNMT	METTL13
4072	Pre_D7_CC_vs_Pre_D0	Pre_D7_CC	Pre_D0	-0.597637	0.202285	-2.95442	16	0.00932431	0.280351	NA	0	0	MOES_HUMAN	P26038	FALSE	MOES	MSN
4073	Pre_D7_CM_vs_Pre_D0	Pre_D7_CM	Pre_D0	-0.568116	0.202285	-2.80849	16	0.0126185	0.533403	NA	0	0	MOES_HUMAN	P26038	FALSE	MOES	MSN
4120	Pre_D7_CC_vs_Pre_D0	Pre_D7_CC	Pre_D0	-0.676838	0.536475	-1.26164	0	NA	NA	NA	0	0	MXRA5_HUMAN	Q9NR99	FALSE	MXRA5	MXRA5
4121	Pre_D7_CM_vs_Pre_D0	Pre_D7_CM	Pre_D0	0.356074	0.454107	0.784119	0	NA	NA	NA	0	0	MXRA5_HUMAN	Q9NR99	FALSE	MXRA5	MXRA5
5824	Pre_D7_CC_vs_Pre_D0	Pre_D7_CC	Pre_D0	(-Inf)	NA	NA	NA	0	0	oneConditionMissing	0.555556	0	SIAS_HUMAN	Q9NR45	FALSE	SIAS	NANS
4360	Pre_D7_CC_vs_Pre_D0	Pre_D7_CC	Pre_D0	-1.15251	0.417887	-2.75794	14	0.0154028	0.327191	NA	0	0	NUCL_HUMAN	P19338	FALSE	NUCL	NCL
4216	Pre_D7_CC_vs_Pre_D0	Pre_D7_CC	Pre_D0	(-Inf)	NA	NA	NA	0	0	oneConditionMissing	0.614035	0	NDRG1_HUMAN	Q92597	FALSE	NDRG1	NDRG1
4217	Pre_D7_CM_vs_Pre_D0	Pre_D7_CM	Pre_D0	-0.319952	1.64345	-0.194683	0	NA	NA	NA	0	0	NDRG1_HUMAN	Q92597	FALSE	NDRG1	NDRG1
4300	Pre_D7_CC_vs_Pre_D0	Pre_D7_CC	Pre_D0	-1.15445	0.44293	-2.6064	14	0.0207174	0.327191	NA	0	0	NONO_HUMAN	Q15233	FALSE	NONO	NONO
4336	Pre_D7_CC_vs_Pre_D0	Pre_D7_CC	Pre_D0	0.00600266	1.92725	0.00311463	0	NA	NA	NA	0	0	NRDC_HUMAN	O43847	FALSE	NRDC	NRDC
4337	Pre_D7_CM_vs_Pre_D0	Pre_D7_CM	Pre_D0	-0.0071614	0.0128944	-0.555385	0	NA	NA	NA	0	0	NRDC_HUMAN	O43847	FALSE	NRDC	NRDC
4372	Pre_D7_CC_vs_Pre_D0	Pre_D7_CC	Pre_D0	-3.98935	0.249629	-15.9811	0	NA	NA	NA	0	0	NUDC_HUMAN	Q9Y266	FALSE	NUDC	NUDC
4373	Pre_D7_CM_vs_Pre_D0	Pre_D7_CM	Pre_D0	-1.55469	0.208713	-7.44892	0	NA	NA	NA	0	0	NUDC_HUMAN	Q9Y266	FALSE	NUDC	NUDC
21	Pre_D7_CM_vs_Post_D7_CM	Pre_D7_CM	Post_D7_CM	-1.08113	0.570672	-1.89449	0	NA	NA	NA	0	0	1433F_HUMAN	Q04917	FALSE	1433F	YWHAH
45	Pre_D7_CM_vs_Post_D7_CM	Pre_D7_CM	Post_D7_CM	-0.748502	0.347315	-2.15511	16	0.0467299	0.998766	NA	0	0	1433Z_HUMAN	P63104	FALSE	1433Z	YWHAZ
153	Pre_D7_CM_vs_Post_D7_CM	Pre_D7_CM	Post_D7_CM	-0.190838	0.731387	-0.260926	0	NA	NA	NA	0	0	ACPH_HUMAN	P13798	FALSE	ACPH	APEH
225	Pre_D7_CM_vs_Post_D7_CM	Pre_D7_CM	Post_D7_CM	-0.175144	0.392843	-0.445839	0	NA	NA	NA	0	0	ADML_HUMAN	P35318	FALSE	ADML	ADM
561	Pre_D7_CM_vs_Post_D7_CM	Pre_D7_CM	Post_D7_CM	-0.31037	0.860419	-0.36072	0	NA	NA	NA	0	0	APT_HUMAN	P07741	FALSE	APT	APRT
681	Pre_D7_CM_vs_Post_D7_CM	Pre_D7_CM	Post_D7_CM	-0.0818069	0.161026	-0.508036	0	NA	NA	NA	0	0	BGAL_HUMAN	P16278	FALSE	BGAL	GLB1
741	Pre_D7_CM_vs_Post_D7_CM	Pre_D7_CM	Post_D7_CM	0.472688	0.398129	1.18727	0	NA	NA	NA	0	0	BMP1_HUMAN	P13497	FALSE	BMP1	BMP1
1101	Pre_D7_CM_vs_Post_D7_CM	Pre_D7_CM	Post_D7_CM	-1.71841	0.755857	-2.27346	11	0.0440395	0.998766	NA	0	0	CFA99_HUMAN	D6REC4	FALSE	CFA99	CFAP99
1809	Pre_D7_CM_vs_Post_D7_CM	Pre_D7_CM	Post_D7_CM	0.275056	0.909949	0.302276	0	NA	NA	NA	0	0	DNPEP_HUMAN	Q9ULA0	FALSE	DNPEP	DNPEP
1881	Pre_D7_CM_vs_Post_D7_CM	Pre_D7_CM	Post_D7_CM	-2.57971	0.980987	-2.62971	14	0.0197977	0.998766	NA	0	0	DSG1_HUMAN	Q02413	FALSE	DSG1	DSG1
2241	Pre_D7_CM_vs_Post_D7_CM	Pre_D7_CM	Post_D7_CM	(-Inf)	NA	NA	NA	0	0	oneConditionMissing	0.76087	0	FHL3_HUMAN	Q13643	FALSE	FHL3	FHL3
3045	Pre_D7_CM_vs_Post_D7_CM	Pre_D7_CM	Post_D7_CM	1.77959	2.58238	0.68913	0	NA	NA	NA	0	0	ICAM1_HUMAN	P05362	FALSE	ICAM1	ICAM1
3177	Pre_D7_CM_vs_Post_D7_CM	Pre_D7_CM	Post_D7_CM	0.619483	0.755523	0.819939	0	NA	NA	NA	0	0	ISG15_HUMAN	P05161	FALSE	ISG15	ISG15
3225	Pre_D7_CM_vs_Post_D7_CM	Pre_D7_CM	Post_D7_CM	Inf	NA	NA	NA	0	0	oneConditionMissing	0.75	0	JUPI1_HUMAN	Q9UK76	FALSE	JUPI1	JPT1
3249	Pre_D7_CM_vs_Post_D7_CM	Pre_D7_CM	Post_D7_CM	-1.56058	0.566301	-2.75574	16	0.014067	0.998766	NA	0	0	K1C13_HUMAN	P13646	FALSE	K1C13	KRT13
3369	Pre_D7_CM_vs_Post_D7_CM	Pre_D7_CM	Post_D7_CM	(-Inf)	NA	NA	NA	0	0	oneConditionMissing	0.5	0	K22O_HUMAN	Q01546	FALSE	K22O	KRT76
3405	Pre_D7_CM_vs_Post_D7_CM	Pre_D7_CM	Post_D7_CM	-1.77089	0.797476	-2.22062	16	0.0411642	0.998766	NA	0	0	K2C4_HUMAN	P19013	FALSE	K2C4	KRT4
3477	Pre_D7_CM_vs_Post_D7_CM	Pre_D7_CM	Post_D7_CM	-1.48534	0.553962	-2.68131	16	0.016387	0.998766	NA	0	0	K2C78_HUMAN	Q8N1N4	FALSE	K2C78	KRT78
3489	Pre_D7_CM_vs_Post_D7_CM	Pre_D7_CM	Post_D7_CM	-2.52094	0.94365	-2.67148	12	0.0203551	0.998766	NA	0	0	K2C79_HUMAN	Q5XKE5	FALSE	K2C79	KRT79
3585	Pre_D7_CM_vs_Post_D7_CM	Pre_D7_CM	Post_D7_CM	(-Inf)	NA	NA	NA	0	0	oneConditionMissing	0.514706	0	KLK7_HUMAN	P49862	FALSE	KLK7	KLK7
3609	Pre_D7_CM_vs_Post_D7_CM	Pre_D7_CM	Post_D7_CM	-1.68031	0.556311	-3.02045	16	0.00812516	0.998766	NA	0	0	KPRP_HUMAN	Q5T749	FALSE	KPRP	KPRP
3813	Pre_D7_CM_vs_Post_D7_CM	Pre_D7_CM	Post_D7_CM	-0.400531	0.664858	-0.602431	0	NA	NA	NA	0	0	LIMA1_HUMAN	Q9UHB6	FALSE	LIMA1	LIMA1
3849	Pre_D7_CM_vs_Post_D7_CM	Pre_D7_CM	Post_D7_CM	(-Inf)	NA	NA	NA	0	0	oneConditionMissing	0.714286	0	LMNB1_HUMAN	P20700	FALSE	LMNB1	LMNB1
3957	Pre_D7_CM_vs_Post_D7_CM	Pre_D7_CM	Post_D7_CM	(-Inf)	NA	NA	NA	0	0	oneConditionMissing	0.75	0	LYPA1_HUMAN	O75608	FALSE	LYPA1	LYPLA1
4125	Pre_D7_CM_vs_Post_D7_CM	Pre_D7_CM	Post_D7_CM	0.635673	0.359003	1.77066	0	NA	NA	NA	0	0	MXRA5_HUMAN	Q9NR99	FALSE	MXRA5	MXRA5
4221	Pre_D7_CM_vs_Post_D7_CM	Pre_D7_CM	Post_D7_CM	-0.781268	1.66491	-0.469255	0	NA	NA	NA	0	0	NDRG1_HUMAN	Q92597	FALSE	NDRG1	NDRG1
4341	Pre_D7_CM_vs_Post_D7_CM	Pre_D7_CM	Post_D7_CM	1.09938	1.75935	0.624879	0	NA	NA	NA	0	0	NRDC_HUMAN	O43847	FALSE	NRDC	NRDC
4377	Pre_D7_CM_vs_Post_D7_CM	Pre_D7_CM	Post_D7_CM	Inf	NA	NA	NA	0	0	oneConditionMissing	0.543478	0	NUDC_HUMAN	Q9Y266	FALSE	NUDC	NUDC
4413	Pre_D7_CM_vs_Post_D7_CM	Pre_D7_CM	Post_D7_CM	Inf	NA	NA	NA	0	0	oneConditionMissing	0.56338	0	P4HA2_HUMAN	O15460	FALSE	P4HA2	P4HA2
4425	Pre_D7_CM_vs_Post_D7_CM	Pre_D7_CM	Post_D7_CM	3.88677	1.82205	2.13318	0	NA	NA	NA	0	0	PA2GA_HUMAN	P14555	FALSE	PA2GA	PLA2G2A
4581	Pre_D7_CM_vs_Post_D7_CM	Pre_D7_CM	Post_D7_CM	1.07578	2.10023	0.512221	0	NA	NA	NA	0	0	PDLI4_HUMAN	P50479	FALSE	PDLI4	PDLIM4
4797	Pre_D7_CM_vs_Post_D7_CM	Pre_D7_CM	Post_D7_CM	-0.992763	1.2997	-0.763838	0	NA	NA	NA	0	0	PLIN3_HUMAN	O60664	FALSE	PLIN3	PLIN3
4881	Pre_D7_CM_vs_Post_D7_CM	Pre_D7_CM	Post_D7_CM	(-Inf)	NA	NA	NA	0	0	oneConditionMissing	0.5	0	POF1B_HUMAN	Q8WVV4	FALSE	POF1B	POF1B
5157	Pre_D7_CM_vs_Post_D7_CM	Pre_D7_CM	Post_D7_CM	(-Inf)	NA	NA	NA	0	0	oneConditionMissing	0.6	0	PSB8_HUMAN	P28062	FALSE	PSB8	PSMB8
5229	Pre_D7_CM_vs_Post_D7_CM	Pre_D7_CM	Post_D7_CM	0.611879	0.301109	2.03208	0	NA	NA	NA	0	0	PUR9_HUMAN	P31939	FALSE	PUR9	ATIC
5337	Pre_D7_CM_vs_Post_D7_CM	Pre_D7_CM	Post_D7_CM	1.23469	0.986161	1.25201	0	NA	NA	NA	0	0	RHG01_HUMAN	Q07960	FALSE	RHG01	ARHGAP1
5601	Pre_D7_CM_vs_Post_D7_CM	Pre_D7_CM	Post_D7_CM	-2.34445	3.40749	-0.688029	0	NA	NA	NA	0	0	S10A7_HUMAN	P31151	FALSE	S10A7	S100A7
5613	Pre_D7_CM_vs_Post_D7_CM	Pre_D7_CM	Post_D7_CM	-2.30779	1.14678	-2.01242	0	NA	NA	NA	0	0	S10A8_HUMAN	P05109	FALSE	S10A8	S100A8
5661	Pre_D7_CM_vs_Post_D7_CM	Pre_D7_CM	Post_D7_CM	-0.664763	1.0023	-0.66324	0	NA	NA	NA	0	0	S10AG_HUMAN	Q96FQ6	FALSE	S10AG	S100A16
5697	Pre_D7_CM_vs_Post_D7_CM	Pre_D7_CM	Post_D7_CM	0.545498	0.610487	0.893545	0	NA	NA	NA	0	0	SARNP_HUMAN	P82979	FALSE	SARNP	SARNP
5709	Pre_D7_CM_vs_Post_D7_CM	Pre_D7_CM	Post_D7_CM	0.553197	1.19022	0.464784	0	NA	NA	NA	0	0	SBSN_HUMAN	Q6UWP8	FALSE	SBSN	SBSN
5817	Pre_D7_CM_vs_Post_D7_CM	Pre_D7_CM	Post_D7_CM	0.415529	1.50896	0.275375	0	NA	NA	NA	0	0	SFRP4_HUMAN	Q6FHJ7	FALSE	SFRP4	SFRP4
5841	Pre_D7_CM_vs_Post_D7_CM	Pre_D7_CM	Post_D7_CM	2.32904	2.18744	1.06473	0	NA	NA	NA	0	0	SIL1_HUMAN	Q9H173	FALSE	SIL1	SIL1
5877	Pre_D7_CM_vs_Post_D7_CM	Pre_D7_CM	Post_D7_CM	-8.15288	1.26698	-6.4349	4	0.00299991	0.998766	NA	0	0	SPB12_HUMAN	Q96P63	FALSE	SPB12	SERPINB12
6093	Pre_D7_CM_vs_Post_D7_CM	Pre_D7_CM	Post_D7_CM	1.28452	0.368642	3.48447	3	0.039926	0.998766	NA	0	0	SULF2_HUMAN	Q8IWU5	FALSE	SULF2	SULF2
6945	Pre_D7_CM_vs_Post_D7_CM	Pre_D7_CM	Post_D7_CM	(-Inf)	NA	NA	NA	0	0	oneConditionMissing	0.535714	0	WFD12_HUMAN	Q8WWY7	FALSE	WFD12	WFDC12
4408	Pre_D7_CC_vs_Pre_D0	Pre_D7_CC	Pre_D0	(-Inf)	NA	NA	NA	0	0	oneConditionMissing	0.5	0	P4HA2_HUMAN	O15460	FALSE	P4HA2	P4HA2
4457	Pre_D7_CM_vs_Pre_D0	Pre_D7_CM	Pre_D0	-0.700885	0.282316	-2.48263	6	0.0476352	0.811769	NA	0	0	PALM_HUMAN	O75781	FALSE	PALM	PALM
4528	Pre_D7_CC_vs_Pre_D0	Pre_D7_CC	Pre_D0	-0.521465	0.21862	-2.38526	16	0.0297795	0.327191	NA	0	0	PDIA3_HUMAN	P30101	FALSE	PDIA3	PDIA3
4576	Pre_D7_CC_vs_Pre_D0	Pre_D7_CC	Pre_D0	(-Inf)	NA	NA	NA	0	0	oneConditionMissing	0.5	0	PDLI4_HUMAN	P50479	FALSE	PDLI4	PDLIM4
4577	Pre_D7_CM_vs_Pre_D0	Pre_D7_CM	Pre_D0	0.460245	1.83587	0.250696	0	NA	NA	NA	0	0	PDLI4_HUMAN	P50479	FALSE	PDLI4	PDLIM4
4636	Pre_D7_CC_vs_Pre_D0	Pre_D7_CC	Pre_D0	(-Inf)	NA	NA	NA	0	0	oneConditionMissing	0.76087	0	PEPD_HUMAN	P12955	FALSE	PEPD	PEPD
4660	Pre_D7_CC_vs_Pre_D0	Pre_D7_CC	Pre_D0	-2.46487	0.963428	-2.55843	6	0.0429993	0.359124	NA	0	0	PFKAP_HUMAN	Q01813	FALSE	PFKAP	PFKP
4420	Pre_D7_CC_vs_Pre_D0	Pre_D7_CC	Pre_D0	-3.85969	0.00660486	-584.371	0	NA	NA	NA	0	0	PA2GA_HUMAN	P14555	FALSE	PA2GA	PLA2G2A
4421	Pre_D7_CM_vs_Pre_D0	Pre_D7_CM	Pre_D0	-0.948936	0.00660486	-143.672	0	NA	NA	NA	0	0	PA2GA_HUMAN	P14555	FALSE	PA2GA	PLA2G2A
4792	Pre_D7_CC_vs_Pre_D0	Pre_D7_CC	Pre_D0	(-Inf)	NA	NA	NA	0	0	oneConditionMissing	0.526316	0	PLIN3_HUMAN	O60664	FALSE	PLIN3	PLIN3
4793	Pre_D7_CM_vs_Pre_D0	Pre_D7_CM	Pre_D0	-0.270385	1.21876	-0.221852	0	NA	NA	NA	0	0	PLIN3_HUMAN	O60664	FALSE	PLIN3	PLIN3
4877	Pre_D7_CM_vs_Pre_D0	Pre_D7_CM	Pre_D0	(-Inf)	NA	NA	NA	0	0	oneConditionMissing	0.625	0	POF1B_HUMAN	Q8WVV4	FALSE	POF1B	POF1B
4180	Pre_D7_CC_vs_Pre_D0	Pre_D7_CC	Pre_D0	(-Inf)	NA	NA	NA	0	0	oneConditionMissing	0.555556	0	MYPT1_HUMAN	O14974	FALSE	MYPT1	PPP1R12A
4960	Pre_D7_CC_vs_Pre_D0	Pre_D7_CC	Pre_D0	-0.834222	0.238843	-3.49276	6	0.0129398	0.324214	NA	0	0	PRDX3_HUMAN	P30048	FALSE	PRDX3	PRDX3
5020	Pre_D7_CC_vs_Pre_D0	Pre_D7_CC	Pre_D0	(-Inf)	NA	NA	NA	0	0	oneConditionMissing	0.704225	0	PRKDC_HUMAN	P78527	FALSE	PRKDC	PRKDC
5140	Pre_D7_CC_vs_Pre_D0	Pre_D7_CC	Pre_D0	(-Inf)	NA	NA	NA	0	0	oneConditionMissing	0.502645	0	PSB6_HUMAN	P28072	FALSE	PSB6	PSMB6
5152	Pre_D7_CC_vs_Pre_D0	Pre_D7_CC	Pre_D0	(-Inf)	NA	NA	NA	0	0	oneConditionMissing	0.6	0	PSB8_HUMAN	P28062	FALSE	PSB8	PSMB8
5153	Pre_D7_CM_vs_Pre_D0	Pre_D7_CM	Pre_D0	(-Inf)	NA	NA	NA	0	0	oneConditionMissing	0.6	0	PSB8_HUMAN	P28062	FALSE	PSB8	PSMB8
5200	Pre_D7_CC_vs_Pre_D0	Pre_D7_CC	Pre_D0	-0.810509	0.303127	-2.67383	16	0.0166396	0.327191	NA	0	0	PTMA_HUMAN	P06454	FALSE	PTMA	PTMA
5201	Pre_D7_CM_vs_Pre_D0	Pre_D7_CM	Pre_D0	-0.71595	0.303127	-2.36188	16	0.0311932	0.693677	NA	0	0	PTMA_HUMAN	P06454	FALSE	PTMA	PTMA
5213	Pre_D7_CM_vs_Pre_D0	Pre_D7_CM	Pre_D0	1.46425	0.41458	3.53189	16	0.00277053	0.323459	NA	0	0	PTX3_HUMAN	P26022	FALSE	PTX3	PTX3
6184	Pre_D7_CC_vs_Pre_D0	Pre_D7_CC	Pre_D0	(-Inf)	NA	NA	NA	0	0	oneConditionMissing	0.619835	0	SYRC_HUMAN	P54136	FALSE	SYRC	RARS1
388	Pre_D7_CC_vs_Pre_D0	Pre_D7_CC	Pre_D0	-0.618769	0.249927	-2.4758	10	0.0327779	0.327191	NA	0	0	AMPB_HUMAN	Q9H4A4	FALSE	AMPB	RNPEP
5536	Pre_D7_CC_vs_Pre_D0	Pre_D7_CC	Pre_D0	-1.0952	0.373796	-2.92995	5	0.0326346	0.327191	NA	0	0	RS21_HUMAN	P63220	FALSE	RS21	RPS21
5656	Pre_D7_CC_vs_Pre_D0	Pre_D7_CC	Pre_D0	(-Inf)	NA	NA	NA	0	0	oneConditionMissing	0.625	0	S10AG_HUMAN	Q96FQ6	FALSE	S10AG	S100A16
5657	Pre_D7_CM_vs_Pre_D0	Pre_D7_CM	Pre_D0	-0.660669	1.09796	-0.601725	0	NA	NA	NA	0	0	S10AG_HUMAN	Q96FQ6	FALSE	S10AG	S100A16
5596	Pre_D7_CC_vs_Pre_D0	Pre_D7_CC	Pre_D0	1.98783	2.40946	0.825013	0	NA	NA	NA	0	0	S10A7_HUMAN	P31151	FALSE	S10A7	S100A7
5597	Pre_D7_CM_vs_Pre_D0	Pre_D7_CM	Pre_D0	1.79672	2.95097	0.608856	0	NA	NA	NA	0	0	S10A7_HUMAN	P31151	FALSE	S10A7	S100A7
5608	Pre_D7_CC_vs_Pre_D0	Pre_D7_CC	Pre_D0	-0.733247	1.40451	-0.522067	0	NA	NA	NA	0	0	S10A8_HUMAN	P05109	FALSE	S10A8	S100A8
5609	Pre_D7_CM_vs_Pre_D0	Pre_D7_CM	Pre_D0	-1.48775	1.40451	-1.05927	0	NA	NA	NA	0	0	S10A8_HUMAN	P05109	FALSE	S10A8	S100A8
5692	Pre_D7_CC_vs_Pre_D0	Pre_D7_CC	Pre_D0	(-Inf)	NA	NA	NA	0	0	oneConditionMissing	0.833333	0	SARNP_HUMAN	P82979	FALSE	SARNP	SARNP
5693	Pre_D7_CM_vs_Pre_D0	Pre_D7_CM	Pre_D0	-0.575027	0.499046	-1.15225	0	NA	NA	NA	0	0	SARNP_HUMAN	P82979	FALSE	SARNP	SARNP
5704	Pre_D7_CC_vs_Pre_D0	Pre_D7_CC	Pre_D0	0.734024	1.06457	0.689504	0	NA	NA	NA	0	0	SBSN_HUMAN	Q6UWP8	FALSE	SBSN	SBSN
5705	Pre_D7_CM_vs_Pre_D0	Pre_D7_CM	Pre_D0	1.89865	1.30382	1.45622	0	NA	NA	NA	0	0	SBSN_HUMAN	Q6UWP8	FALSE	SBSN	SBSN
5873	Pre_D7_CM_vs_Pre_D0	Pre_D7_CM	Pre_D0	-8.24334	1.38791	-5.93941	4	0.00402957	0.328217	NA	0	0	SPB12_HUMAN	Q96P63	FALSE	SPB12	SERPINB12
4433	Pre_D7_CM_vs_Pre_D0	Pre_D7_CM	Pre_D0	0.765842	0.289601	2.64447	16	0.0176672	0.589328	NA	0	0	PAI1_HUMAN	P05121	FALSE	PAI1	SERPINE1
3028	Pre_D7_CC_vs_Pre_D0	Pre_D7_CC	Pre_D0	-0.932428	0.356029	-2.61897	9	0.0278581	0.327191	NA	0	0	IC1_HUMAN	P05155	FALSE	IC1	SERPING1
5812	Pre_D7_CC_vs_Pre_D0	Pre_D7_CC	Pre_D0	0.743707	0.00480441	154.797	0	NA	NA	NA	0	0	SFRP4_HUMAN	Q6FHJ7	FALSE	SFRP4	SFRP4
5813	Pre_D7_CM_vs_Pre_D0	Pre_D7_CM	Pre_D0	0.798835	0.00339723	235.143	0	NA	NA	NA	0	0	SFRP4_HUMAN	Q6FHJ7	FALSE	SFRP4	SFRP4
5836	Pre_D7_CC_vs_Pre_D0	Pre_D7_CC	Pre_D0	(-Inf)	NA	NA	NA	0	0	oneConditionMissing	0.75	0	SIL1_HUMAN	Q9H173	FALSE	SIL1	SIL1
5837	Pre_D7_CM_vs_Pre_D0	Pre_D7_CM	Pre_D0	5.69286	2.76692	2.05747	0	NA	NA	NA	0	0	SIL1_HUMAN	Q9H173	FALSE	SIL1	SIL1
5921	Pre_D7_CM_vs_Pre_D0	Pre_D7_CM	Pre_D0	1.12941	0.32752	3.44837	6	0.0136603	0.533403	NA	0	0	SPON2_HUMAN	Q9BUD6	FALSE	SPON2	SPON2
6220	Pre_D7_CC_vs_Pre_D0	Pre_D7_CC	Pre_D0	-0.785938	0.313748	-2.50499	16	0.0234375	0.327191	NA	0	0	TAGL_HUMAN	Q01995	FALSE	TAGL	TAGLN
6221	Pre_D7_CM_vs_Pre_D0	Pre_D7_CM	Pre_D0	-0.868571	0.313748	-2.76837	16	0.0137063	0.533403	NA	0	0	TAGL_HUMAN	Q01995	FALSE	TAGL	TAGLN
6592	Pre_D7_CC_vs_Pre_D0	Pre_D7_CC	Pre_D0	Inf	NA	NA	NA	0	0	oneConditionMissing	0.508637	0	TRFE_HUMAN;cRAP-TRFE_HUMAN	P02787;cRAP-P02787	FALSE	TRFE	TF
6593	Pre_D7_CM_vs_Pre_D0	Pre_D7_CM	Pre_D0	Inf	NA	NA	NA	0	0	oneConditionMissing	0.503802	0	TRFE_HUMAN;cRAP-TRFE_HUMAN	P02787;cRAP-P02787	FALSE	TRFE	TF
6400	Pre_D7_CC_vs_Pre_D0	Pre_D7_CC	Pre_D0	(-Inf)	NA	NA	NA	0	0	oneConditionMissing	0.510949	0	TFG_HUMAN	Q92734	FALSE	TFG	TFG
6436	Pre_D7_CC_vs_Pre_D0	Pre_D7_CC	Pre_D0	3.67473	1.1844	3.10262	6	0.0210459	0.327191	NA	0	0	TGM3_HUMAN	Q08188	FALSE	TGM3	TGM3
6437	Pre_D7_CM_vs_Pre_D0	Pre_D7_CM	Pre_D0	3.49123	1.29744	2.69086	6	0.0360115	0.731191	NA	0	0	TGM3_HUMAN	Q08188	FALSE	TGM3	TGM3
6653	Pre_D7_CM_vs_Pre_D0	Pre_D7_CM	Pre_D0	0.828859	0.338949	2.44538	16	0.0264156	0.689708	NA	0	0	TSP1_HUMAN	P07996	FALSE	TSP1	THBS1
6496	Pre_D7_CC_vs_Pre_D0	Pre_D7_CC	Pre_D0	-1.5379	0.0910915	-16.883	1	0.0376637	0.333065	NA	0	0	TINAL_HUMAN	Q9GZM7	FALSE	TINAL	TINAGL1
6497	Pre_D7_CM_vs_Pre_D0	Pre_D7_CM	Pre_D0	-1.17813	0.0908064	-12.9741	1	0.0489716	0.811769	NA	0	0	TINAL_HUMAN	Q9GZM7	FALSE	TINAL	TINAGL1
6544	Pre_D7_CC_vs_Pre_D0	Pre_D7_CC	Pre_D0	(-Inf)	NA	NA	NA	0	0	oneConditionMissing	0.515873	0	TPD54_HUMAN	O43399	FALSE	TPD54	TPD52L2
6700	Pre_D7_CC_vs_Pre_D0	Pre_D7_CC	Pre_D0	-0.514821	0.181693	-2.83347	16	0.0119839	0.317925	NA	0	0	TXND5_HUMAN	Q8NBS9	FALSE	TXND5	TXNDC5
6748	Pre_D7_CC_vs_Pre_D0	Pre_D7_CC	Pre_D0	-0.715962	0.288788	-2.4792	16	0.0246849	0.327191	NA	0	0	UBA1_HUMAN	P22314	FALSE	UBA1	UBA1
6796	Pre_D7_CC_vs_Pre_D0	Pre_D7_CC	Pre_D0	-1.10137	0.4495	-2.45021	12	0.0305816	0.327191	NA	0	0	UGDH_HUMAN	O60701	FALSE	UGDH	UGDH
6868	Pre_D7_CC_vs_Pre_D0	Pre_D7_CC	Pre_D0	-0.788053	0.35651	-2.21047	16	0.0419848	0.357267	NA	0	0	VAT1_HUMAN	Q99536	FALSE	VAT1	VAT1
6940	Pre_D7_CC_vs_Pre_D0	Pre_D7_CC	Pre_D0	(-Inf)	NA	NA	NA	0	0	oneConditionMissing	0.75	0	WFD12_HUMAN	Q8WWY7	FALSE	WFD12	WFDC12
6941	Pre_D7_CM_vs_Pre_D0	Pre_D7_CM	Pre_D0	(-Inf)	NA	NA	NA	0	0	oneConditionMissing	0.75	0	WFD12_HUMAN	Q8WWY7	FALSE	WFD12	WFDC12
6976	Pre_D7_CC_vs_Pre_D0	Pre_D7_CC	Pre_D0	-1.09379	0.460687	-2.37426	13	0.033667	0.327191	NA	0	0	XRCC6_HUMAN	P12956	FALSE	XRCC6	XRCC6
4	Pre_D7_CC_vs_Pre_D0	Pre_D7_CC	Pre_D0	-0.710274	0.300832	-2.36103	16	0.0312461	0.327191	NA	0	0	1433B_HUMAN	P31946	FALSE	1433B	YWHAB
16	Pre_D7_CC_vs_Pre_D0	Pre_D7_CC	Pre_D0	-0.68348	0.00287228	-237.958	0	NA	NA	NA	0	0	1433F_HUMAN	Q04917	FALSE	1433F	YWHAH
17	Pre_D7_CM_vs_Pre_D0	Pre_D7_CM	Pre_D0	-1.19202	0.00287227	-415.011	0	NA	NA	NA	0	0	1433F_HUMAN	Q04917	FALSE	1433F	YWHAH
18	Pre_D7_CM_vs_Pre_D7_CC	Pre_D7_CM	Pre_D7_CC	-0.508543	0.00287228	-177.052	0	NA	NA	NA	0	0	1433F_HUMAN	Q04917	FALSE	1433F	YWHAH
150	Pre_D7_CM_vs_Pre_D7_CC	Pre_D7_CM	Pre_D7_CC	0.922081	0.92514	0.996694	0	NA	NA	NA	0	0	ACPH_HUMAN	P13798	FALSE	ACPH	APEH
222	Pre_D7_CM_vs_Pre_D7_CC	Pre_D7_CM	Pre_D7_CC	0.719174	0.00200274	359.096	0	NA	NA	NA	0	0	ADML_HUMAN	P35318	FALSE	ADML	ADM
234	Pre_D7_CM_vs_Pre_D7_CC	Pre_D7_CM	Pre_D7_CC	Inf	NA	NA	NA	0	0	oneConditionMissing	0.757576	0	ADRM1_HUMAN	Q16186	FALSE	ADRM1	ADRM1
558	Pre_D7_CM_vs_Pre_D7_CC	Pre_D7_CM	Pre_D7_CC	-0.25799	1.21682	-0.212021	0	NA	NA	NA	0	0	APT_HUMAN	P07741	FALSE	APT	APRT
630	Pre_D7_CM_vs_Pre_D7_CC	Pre_D7_CM	Pre_D7_CC	Inf	NA	NA	NA	0	0	oneConditionMissing	0.614035	0	AT1A1_HUMAN	P05023	FALSE	AT1A1	ATP1A1
654	Pre_D7_CM_vs_Pre_D7_CC	Pre_D7_CM	Pre_D7_CC	1.35971	0.504376	2.69583	15	0.0165969	0.8682	NA	0	0	B2MG_HUMAN;cRAP-B2MG_HUMAN	P61769;cRAP-P61769	FALSE	B2MG	B2M
678	Pre_D7_CM_vs_Pre_D7_CC	Pre_D7_CM	Pre_D7_CC	0.567582	0.157465	3.6045	0	NA	NA	NA	0	0	BGAL_HUMAN	P16278	FALSE	BGAL	GLB1
702	Pre_D7_CM_vs_Pre_D7_CC	Pre_D7_CM	Pre_D7_CC	4.43404	1.3872	3.1964	4	0.0330139	0.8682	NA	0	0	BIEA_HUMAN	P53004	FALSE	BIEA	BLVRA
738	Pre_D7_CM_vs_Pre_D7_CC	Pre_D7_CM	Pre_D7_CC	0.477102	0.00106428	448.286	0	NA	NA	NA	0	0	BMP1_HUMAN	P13497	FALSE	BMP1	BMP1
1434	Pre_D7_CM_vs_Pre_D7_CC	Pre_D7_CM	Pre_D7_CC	0.827085	0.256193	3.22836	7	0.0144846	0.8682	NA	0	0	COR1B_HUMAN	Q9BR76	FALSE	COR1B	CORO1B
1674	Pre_D7_CM_vs_Pre_D7_CC	Pre_D7_CM	Pre_D7_CC	Inf	NA	NA	NA	0	0	oneConditionMissing	0.530303	0	DCTN2_HUMAN	Q13561	FALSE	DCTN2	DCTN2
1698	Pre_D7_CM_vs_Pre_D7_CC	Pre_D7_CM	Pre_D7_CC	1.00668	0.222854	4.5172	4	0.0106811	0.8682	NA	0	0	DDTL_HUMAN;DOPD_HUMAN	A6NHG4;P30046	FALSE	DDTL	DDTL
1794	Pre_D7_CM_vs_Pre_D7_CC	Pre_D7_CM	Pre_D7_CC	Inf	NA	NA	NA	0	0	oneConditionMissing	0.757576	0	DHX9_HUMAN	Q08211	FALSE	DHX9	DHX9
1806	Pre_D7_CM_vs_Pre_D7_CC	Pre_D7_CM	Pre_D7_CC	Inf	NA	NA	NA	0	0	oneConditionMissing	0.803571	0	DNPEP_HUMAN	Q9ULA0	FALSE	DNPEP	DNPEP
1974	Pre_D7_CM_vs_Pre_D7_CC	Pre_D7_CM	Pre_D7_CC	-0.37109	0.0183127	-20.2641	1	0.0313907	0.8682	NA	0	0	EFNMT_HUMAN	Q8N6R0	FALSE	EFNMT	METTL13
2238	Pre_D7_CM_vs_Pre_D7_CC	Pre_D7_CM	Pre_D7_CC	(-Inf)	NA	NA	NA	0	0	oneConditionMissing	0.76087	0	FHL3_HUMAN	Q13643	FALSE	FHL3	FHL3
2430	Pre_D7_CM_vs_Pre_D7_CC	Pre_D7_CM	Pre_D7_CC	0.408705	0.170254	2.40056	14	0.030836	0.8682	NA	0	0	G6PI_HUMAN	P06744	FALSE	G6PI	GPI
2490	Pre_D7_CM_vs_Pre_D7_CC	Pre_D7_CM	Pre_D7_CC	0.567297	0.23666	2.3971	12	0.0336963	0.8682	NA	0	0	GDIR1_HUMAN	P52565	FALSE	GDIR1	ARHGDIA
2514	Pre_D7_CM_vs_Pre_D7_CC	Pre_D7_CM	Pre_D7_CC	0.612194	0.279131	2.19321	15	0.0444677	0.929036	NA	0	0	GELS_HUMAN;cRAP-GELS_HUMAN	P06396;cRAP-P06396	FALSE	GELS	GSN
2538	Pre_D7_CM_vs_Pre_D7_CC	Pre_D7_CM	Pre_D7_CC	0.766756	0.294384	2.60461	10	0.0262825	0.8682	NA	0	0	GLGB_HUMAN	Q04446	FALSE	GLGB	GBE1
2682	Pre_D7_CM_vs_Pre_D7_CC	Pre_D7_CM	Pre_D7_CC	2.25129	0.72037	3.12519	14	0.00745005	0.8682	NA	0	0	H37_HUMAN	Q5TEC6	FALSE	H37	H3-7
2730	Pre_D7_CM_vs_Pre_D7_CC	Pre_D7_CM	Pre_D7_CC	Inf	NA	NA	NA	0	0	oneConditionMissing	0.543478	0	HDGF_HUMAN	P51858	FALSE	HDGF	HDGF
2778	Pre_D7_CM_vs_Pre_D7_CC	Pre_D7_CM	Pre_D7_CC	1.17827	0.39479	2.98454	11	0.0124183	0.8682	NA	0	0	HNRH2_HUMAN	P55795	FALSE	HNRH2	HNRNPH2
2790	Pre_D7_CM_vs_Pre_D7_CC	Pre_D7_CM	Pre_D7_CC	1.79013	0.513076	3.48901	6	0.012999	0.8682	NA	0	0	HNRH3_HUMAN	P31942	FALSE	HNRH3	HNRNPH3
2934	Pre_D7_CM_vs_Pre_D7_CC	Pre_D7_CM	Pre_D7_CC	Inf	NA	NA	NA	0	0	oneConditionMissing	0.502392	0	HXK1_HUMAN	P19367	FALSE	HXK1	HK1
2958	Pre_D7_CM_vs_Pre_D7_CC	Pre_D7_CM	Pre_D7_CC	1.3156	0.609438	2.15871	15	0.047484	0.929036	NA	0	0	IBP2_HUMAN	P18065	FALSE	IBP2	IGFBP2
2970	Pre_D7_CM_vs_Pre_D7_CC	Pre_D7_CM	Pre_D7_CC	0.97967	0.424555	2.30752	16	0.034728	0.8682	NA	0	0	IBP3_HUMAN	P17936	FALSE	IBP3	IGFBP3
3042	Pre_D7_CM_vs_Pre_D7_CC	Pre_D7_CM	Pre_D7_CC	3.50758	1.71796	2.04171	0	NA	NA	NA	0	0	ICAM1_HUMAN	P05362	FALSE	ICAM1	ICAM1
3174	Pre_D7_CM_vs_Pre_D7_CC	Pre_D7_CM	Pre_D7_CC	0.587737	0.755523	0.777921	0	NA	NA	NA	0	0	ISG15_HUMAN	P05161	FALSE	ISG15	ISG15
3222	Pre_D7_CM_vs_Pre_D7_CC	Pre_D7_CM	Pre_D7_CC	Inf	NA	NA	NA	0	0	oneConditionMissing	0.75	0	JUPI1_HUMAN	Q9UK76	FALSE	JUPI1	JPT1
3366	Pre_D7_CM_vs_Pre_D7_CC	Pre_D7_CM	Pre_D7_CC	(-Inf)	NA	NA	NA	0	0	oneConditionMissing	0.6	0	K22O_HUMAN	Q01546	FALSE	K22O	KRT76
3570	Pre_D7_CM_vs_Pre_D7_CC	Pre_D7_CM	Pre_D7_CC	1.65197	0.604655	2.73209	7	0.0292502	0.8682	NA	0	0	KITM_HUMAN	O00142	FALSE	KITM	TK2
3630	Pre_D7_CM_vs_Pre_D7_CC	Pre_D7_CM	Pre_D7_CC	Inf	NA	NA	NA	0	0	oneConditionMissing	0.803571	0	KTN1_HUMAN	Q86UP2	FALSE	KTN1	KTN1
3810	Pre_D7_CM_vs_Pre_D7_CC	Pre_D7_CM	Pre_D7_CC	Inf	NA	NA	NA	0	0	oneConditionMissing	0.75	0	LIMA1_HUMAN	Q9UHB6	FALSE	LIMA1	LIMA1
3954	Pre_D7_CM_vs_Pre_D7_CC	Pre_D7_CM	Pre_D7_CC	(-Inf)	NA	NA	NA	0	0	oneConditionMissing	0.6	0	LYPA1_HUMAN	O75608	FALSE	LYPA1	LYPLA1
3978	Pre_D7_CM_vs_Pre_D7_CC	Pre_D7_CM	Pre_D7_CC	Inf	NA	NA	NA	0	0	oneConditionMissing	0.581395	0	MACF1_HUMAN	Q9UPN3	FALSE	MACF1	MACF1
4122	Pre_D7_CM_vs_Pre_D7_CC	Pre_D7_CM	Pre_D7_CC	1.03291	0.370944	2.78455	0	NA	NA	NA	0	0	MXRA5_HUMAN	Q9NR99	FALSE	MXRA5	MXRA5
4182	Pre_D7_CM_vs_Pre_D7_CC	Pre_D7_CM	Pre_D7_CC	Inf	NA	NA	NA	0	0	oneConditionMissing	0.6	0	MYPT1_HUMAN	O14974	FALSE	MYPT1	PPP1R12A
4218	Pre_D7_CM_vs_Pre_D7_CC	Pre_D7_CM	Pre_D7_CC	Inf	NA	NA	NA	0	0	oneConditionMissing	0.76087	0	NDRG1_HUMAN	Q92597	FALSE	NDRG1	NDRG1
4338	Pre_D7_CM_vs_Pre_D7_CC	Pre_D7_CM	Pre_D7_CC	-0.013164	1.92727	-0.0068304	0	NA	NA	NA	0	0	NRDC_HUMAN	O43847	FALSE	NRDC	NRDC
4374	Pre_D7_CM_vs_Pre_D7_CC	Pre_D7_CM	Pre_D7_CC	2.43467	0.208713	11.6651	0	NA	NA	NA	0	0	NUDC_HUMAN	Q9Y266	FALSE	NUDC	NUDC
4410	Pre_D7_CM_vs_Pre_D7_CC	Pre_D7_CM	Pre_D7_CC	Inf	NA	NA	NA	0	0	oneConditionMissing	0.56338	0	P4HA2_HUMAN	O15460	FALSE	P4HA2	P4HA2
4422	Pre_D7_CM_vs_Pre_D7_CC	Pre_D7_CM	Pre_D7_CC	2.91076	0.00934067	311.622	0	NA	NA	NA	0	0	PA2GA_HUMAN	P14555	FALSE	PA2GA	PLA2G2A
4434	Pre_D7_CM_vs_Pre_D7_CC	Pre_D7_CM	Pre_D7_CC	0.630249	0.289601	2.17627	16	0.0448609	0.929036	NA	0	0	PAI1_HUMAN	P05121	FALSE	PAI1	SERPINE1
4578	Pre_D7_CM_vs_Pre_D7_CC	Pre_D7_CM	Pre_D7_CC	Inf	NA	NA	NA	0	0	oneConditionMissing	0.6	0	PDLI4_HUMAN	P50479	FALSE	PDLI4	PDLIM4
4638	Pre_D7_CM_vs_Pre_D7_CC	Pre_D7_CM	Pre_D7_CC	Inf	NA	NA	NA	0	0	oneConditionMissing	0.76087	0	PEPD_HUMAN	P12955	FALSE	PEPD	PEPD
4794	Pre_D7_CM_vs_Pre_D7_CC	Pre_D7_CM	Pre_D7_CC	Inf	NA	NA	NA	0	0	oneConditionMissing	0.769231	0	PLIN3_HUMAN	O60664	FALSE	PLIN3	PLIN3
4806	Pre_D7_CM_vs_Pre_D7_CC	Pre_D7_CM	Pre_D7_CC	0.71298	0.300425	2.37324	15	0.0314239	0.8682	NA	0	0	PLOD1_HUMAN	Q02809	FALSE	PLOD1	PLOD1
4878	Pre_D7_CM_vs_Pre_D7_CC	Pre_D7_CM	Pre_D7_CC	(-Inf)	NA	NA	NA	0	0	oneConditionMissing	0.581395	0	POF1B_HUMAN	Q8WVV4	FALSE	POF1B	POF1B
5022	Pre_D7_CM_vs_Pre_D7_CC	Pre_D7_CM	Pre_D7_CC	Inf	NA	NA	NA	0	0	oneConditionMissing	0.769231	0	PRKDC_HUMAN	P78527	FALSE	PRKDC	PRKDC
5142	Pre_D7_CM_vs_Pre_D7_CC	Pre_D7_CM	Pre_D7_CC	Inf	NA	NA	NA	0	0	oneConditionMissing	0.811966	0	PSB6_HUMAN	P28072	FALSE	PSB6	PSMB6
5214	Pre_D7_CM_vs_Pre_D7_CC	Pre_D7_CM	Pre_D7_CC	1.09535	0.41458	2.64207	16	0.0177538	0.8682	NA	0	0	PTX3_HUMAN	P26022	FALSE	PTX3	PTX3
5226	Pre_D7_CM_vs_Pre_D7_CC	Pre_D7_CM	Pre_D7_CC	1.0171	0.405374	2.50903	0	NA	NA	NA	0	0	PUR9_HUMAN	P31939	FALSE	PUR9	ATIC
5334	Pre_D7_CM_vs_Pre_D7_CC	Pre_D7_CM	Pre_D7_CC	0.506569	1.08991	0.464782	0	NA	NA	NA	0	0	RHG01_HUMAN	Q07960	FALSE	RHG01	ARHGAP1
5598	Pre_D7_CM_vs_Pre_D7_CC	Pre_D7_CM	Pre_D7_CC	-0.191117	2.95097	-0.0647642	0	NA	NA	NA	0	0	S10A7_HUMAN	P31151	FALSE	S10A7	S100A7
5610	Pre_D7_CM_vs_Pre_D7_CC	Pre_D7_CM	Pre_D7_CC	-0.754507	1.14678	-0.657938	0	NA	NA	NA	0	0	S10A8_HUMAN	P05109	FALSE	S10A8	S100A8
5658	Pre_D7_CM_vs_Pre_D7_CC	Pre_D7_CM	Pre_D7_CC	Inf	NA	NA	NA	0	0	oneConditionMissing	0.769231	0	S10AG_HUMAN	Q96FQ6	FALSE	S10AG	S100A16
5694	Pre_D7_CM_vs_Pre_D7_CC	Pre_D7_CM	Pre_D7_CC	Inf	NA	NA	NA	0	0	oneConditionMissing	0.606061	0	SARNP_HUMAN	P82979	FALSE	SARNP	SARNP
5706	Pre_D7_CM_vs_Pre_D7_CC	Pre_D7_CM	Pre_D7_CC	1.16463	1.30382	0.89324	0	NA	NA	NA	0	0	SBSN_HUMAN	Q6UWP8	FALSE	SBSN	SBSN
5814	Pre_D7_CM_vs_Pre_D7_CC	Pre_D7_CM	Pre_D7_CC	0.0551287	0.00339723	16.2275	0	NA	NA	NA	0	0	SFRP4_HUMAN	Q6FHJ7	FALSE	SFRP4	SFRP4
5826	Pre_D7_CM_vs_Pre_D7_CC	Pre_D7_CM	Pre_D7_CC	Inf	NA	NA	NA	0	0	oneConditionMissing	0.609756	0	SIAS_HUMAN	Q9NR45	FALSE	SIAS	NANS
5838	Pre_D7_CM_vs_Pre_D7_CC	Pre_D7_CM	Pre_D7_CC	Inf	NA	NA	NA	0	0	oneConditionMissing	0.5	0	SIL1_HUMAN	Q9H173	FALSE	SIL1	SIL1
5874	Pre_D7_CM_vs_Pre_D7_CC	Pre_D7_CM	Pre_D7_CC	-7.56736	1.26698	-5.97276	4	0.0039478	0.8682	NA	0	0	SPB12_HUMAN	Q96P63	FALSE	SPB12	SERPINB12
6018	Pre_D7_CM_vs_Pre_D7_CC	Pre_D7_CM	Pre_D7_CC	0.781843	0.324103	2.41233	7	0.0466142	0.929036	NA	0	0	SRPX2_HUMAN	O60687	FALSE	SRPX2	SRPX2
6186	Pre_D7_CM_vs_Pre_D7_CC	Pre_D7_CM	Pre_D7_CC	Inf	NA	NA	NA	0	0	oneConditionMissing	0.630252	0	SYRC_HUMAN	P54136	FALSE	SYRC	RARS1
6306	Pre_D7_CM_vs_Pre_D7_CC	Pre_D7_CM	Pre_D7_CC	0.672053	0.297472	2.25922	12	0.0432719	0.929036	NA	0	0	TCPA_HUMAN	P17987	FALSE	TCPA	TCP1
6330	Pre_D7_CM_vs_Pre_D7_CC	Pre_D7_CM	Pre_D7_CC	Inf	NA	NA	NA	0	0	oneConditionMissing	0.593607	0	TCPD_HUMAN	P50991	FALSE	TCPD	CCT4
6402	Pre_D7_CM_vs_Pre_D7_CC	Pre_D7_CM	Pre_D7_CC	Inf	NA	NA	NA	0	0	oneConditionMissing	0.614035	0	TFG_HUMAN	Q92734	FALSE	TFG	TFG
6462	Pre_D7_CM_vs_Pre_D7_CC	Pre_D7_CM	Pre_D7_CC	6.38046	0.099199	64.3198	3	8.2805e-06	0.00372624	NA	0	0	THOC4_HUMAN	Q86V81	FALSE	THOC4	ALYREF
6546	Pre_D7_CM_vs_Pre_D7_CC	Pre_D7_CM	Pre_D7_CC	Inf	NA	NA	NA	0	0	oneConditionMissing	0.550847	0	TPD54_HUMAN	O43399	FALSE	TPD54	TPD52L2
6654	Pre_D7_CM_vs_Pre_D7_CC	Pre_D7_CM	Pre_D7_CC	0.818555	0.338949	2.41498	16	0.028069	0.8682	NA	0	0	TSP1_HUMAN	P07996	FALSE	TSP1	THBS1
				(-Inf)	NA	NA	NA	0	0	oneConditionMissing	0.555556	0	AK1C1_HUMAN;AK1C3_HUMAN	P42330;Q04828	FALSE	AK1C3	AKR1C3
				Inf	NA	NA	NA	0	0	oneConditionMissing	0.512821	0	AK1C1_HUMAN;AK1C3_HUMAN	P42330;Q04828	FALSE	AK1C3	AKR1C3
				Inf	NA	NA	NA	0	0	oneConditionMissing	0.330579	0	AK1C1_HUMAN;AK1C3_HUMAN	P42330;Q04828	FALSE	AK1C3	AKR1C3
				(-Inf)	NA	NA	NA	0	0	oneConditionMissing	0.408163	0	AK1C1_HUMAN;AK1C3_HUMAN	P42330;Q04828	FALSE	AK1C3	AKR1C3
				Inf	NA	NA	NA	0	0	oneConditionMissing	0.8	0	AK1C1_HUMAN;AK1C3_HUMAN	P42330;Q04828	FALSE	AK1C3	AKR1C3
																AK1C3
				-1.31691	0.53345	-2.46867	8	0.0387907	0.657436	NA	0	0	CO4A_HUMAN;CO4B_HUMAN	P0C0L4;P0C0L5	FALSE	CO4B	C4B
				-1.01567	0.337383	-3.01042	8	0.0168027	0.581378	NA	0	0	CO4A_HUMAN;CO4B_HUMAN	P0C0L4;P0C0L5	FALSE	CO4B	C4B
				-2.05529	0.631187	-3.25623	8	0.0115924	0.176496	NA	0	0	CO4A_HUMAN;CO4B_HUMAN	P0C0L4;P0C0L5	FALSE	CO4B	C4B
				-1.32583	0.477132	-2.77876	8	0.0239705	0.504469	NA	0	0	CO4A_HUMAN;CO4B_HUMAN	P0C0L4;P0C0L5	FALSE	CO4B	C4B
				1.45366	0.285287	5.09544	4	0.00700484	0.277992	NA	0	0	DDTL_HUMAN;DOPD_HUMAN	A6NHG4;P30046	FALSE	DOPD	DDT
				-0.704612	0.222854	-3.16177	4	0.0341261	0.327191	NA	0	0	DDTL_HUMAN;DOPD_HUMAN	A6NHG4;P30046	FALSE	DOPD	DDT
				1.00668	0.222854	4.5172	4	0.0106811	0.8682	NA	0	0	DDTL_HUMAN;DOPD_HUMAN	A6NHG4;P30046	FALSE	DOPD	DDT

## Sheet: 4C_cc-cm
Supplementary Table 4C. Predicted source for CM- and CC-enriched or unique proteins for all samples (Pre and Post combined).
Abbreviations: CC, co-culture; CM, conditioned media; D0, [experimental] day 0; D7, [experimental] day 7; Pre, prepubertal; Post, postpubertal; SMC, smooth muscle cell.
'N/A' in 'Predicted source' column indicates the corresponding transcript was detected at extremely low levels in all interstitial cell types.
ProtName	Gene symbol(s)	Classification	Predicted source
ADML	ADM	Only in CM	Lymphatic endothelial
AKA12	AKAP12	Only in CM	Lymphatic endothelial
BGAL	GLB1	Up in CM	Lymphatic endothelial
MK01	MAPK1	Only in CM	Lymphatic endothelial
EFNMT	METTL13	Up in CC	Lymphatic endothelial
NDRG1	NDRG1	Only in CM	Lymphatic endothelial
NNMT	NNMT	Only in CM	Lymphatic endothelial
PDC6I	PDCD6IP	Only in CM	Lymphatic endothelial
PEPD	PEPD	Only in CM	Lymphatic endothelial
PTX3	PTX3	Up in CM	Lymphatic endothelial
PXDN	PXDN	Up in CM	Lymphatic endothelial
S10AG	S100A16	Only in CM	Lymphatic endothelial
SEPT9	SEPTIN9	Only in CM	Lymphatic endothelial
TPD54	TPD52L2	Only in CM	Lymphatic endothelial
ACPH	APEH	Up in CM	Myeloid
FRIH	FTH1	Up in CM	Myeloid
S10AB	S100A11	Up in CM	Myeloid
S10A8	S100A8	Only in CM	Myeloid
DDTL	DDTL	Up in CM	N/A
GDF15	GDF15	Up in CM	N/A
IBP1	IGFBP1	Up in CM	N/A
K22O	KRT76	Only in CC	N/A
MXRA5	MXRA5	Up in CM	N/A
POF1B	POF1B	Only in CC	N/A
S10A7	S100A7	Up in CM	N/A
SBSN	SBSN	Up in CM	N/A
SPB12	SERPINB12	Up in CC	N/A
STC2	STC2	Up in CM	N/A
PDLI4	PDLIM4	Only in CM	Neuronal
PRIO	PRNP	Up in CM	Neuronal
TIG1	RARRES1	Only in CM	Neuronal
ALDOA	ALDOA	Up in CM	SMC
THOC4	ALYREF	Up in CM	SMC
RHG01	ARHGAP1	Up in CC	SMC
PUR9	ATIC	Up in CM	SMC
BMP1	BMP1	Up in CM	SMC
CBR1	CBR1	Up in CM	SMC
TCPD	CCT4	Only in CM	SMC
CD248	CD248	Only in CM	SMC
CLIC1	CLIC1	Up in CM	SMC
DCTN2	DCTN2	Only in CM	SMC
DNPEP	DNPEP	Only in CM	SMC
G3P	GAPDH	Up in CM	SMC
G6PI	GPI	Up in CM	SMC
HDGF	HDGF	Only in CM	SMC
HNRH2	HNRNPH2	Up in CM	SMC
KTN1	KTN1	Only in CM	SMC
MIF	MIF	Up in CM	SMC
MT2	MT2A	Up in CM	SMC
MYPT1	PPP1R12A	Only in CM	SMC
PRDX1	PRDX1	Up in CM	SMC
PRDX3	PRDX3	Up in CM	SMC
PSB6	PSMB6	Only in CM	SMC
SARNP	SARNP	Only in CM	SMC
TSP1	THBS1	Up in CM	SMC
TENA	TNC	Only in CM	SMC
TPIS	TPI1	Up in CM	SMC
1433F	YWHAH	Only in CM	SMC
COR1B	CORO1B	Up in CM	T cells
PNPH	PNP	Up in CM	T cells
CO6A1	COL6A1	Up in CM	Theca/stromal
EF2	EEF2	Up in CM	Theca/stromal
ENOA	ENO1	Up in CM	Theca/stromal
FBLN1	FBLN1	Up in CM	Theca/stromal
H37	H3-7	Up in CM	Theca/stromal
HBA	HBA1; HBA2	Only in CM	Theca/stromal
IDHC	IDH1	Up in CM	Theca/stromal
IBP2	IGFBP2	Up in CM	Theca/stromal
IBP5	IGFBP5	Up in CM	Theca/stromal
P4HA1	P4HA1	Only in CM	Theca/stromal
PA2GA	PLA2G2A	Only in CM	Theca/stromal
PLIN3	PLIN3	Only in CM	Theca/stromal
PLOD1	PLOD1	Up in CM	Theca/stromal
RLA0	RPLP0	Up in CM	Theca/stromal
PAI1	SERPINE1	Up in CM	Theca/stromal
SFRP4	SFRP4	Only in CM	Theca/stromal
TFR1	TFRC	Up in CM	Theca/stromal
TIMP1	TIMP1	Up in CM	Theca/stromal
ADRM1	ADRM1	Only in CM	Vascular endothelial
AK1C1	AKR1C1	Only in CM	Vascular endothelial
APT	APRT	Only in CM	Vascular endothelial
GDIR1	ARHGDIA	Up in CM	Vascular endothelial
AT1A1	ATP1A1	Only in CM	Vascular endothelial
B2MG	B2M	Up in CM	Vascular endothelial
CLUS	CLU	Up in CM	Vascular endothelial
COPA	COPA	Up in CM	Vascular endothelial
DHX9	DHX9	Only in CM	Vascular endothelial
FAS	FASN	Up in CM	Vascular endothelial
GLGB	GBE1	Up in CM	Vascular endothelial
GDIB	GDI2	Up in CM	Vascular endothelial
HXK1	HK1	Only in CM	Vascular endothelial
DHB4	HSD17B4	Only in CM	Vascular endothelial
ICAM1	ICAM1	Only in CM	Vascular endothelial
IBP3	IGFBP3	Up in CM	Vascular endothelial
IBP4	IGFBP4	Up in CM	Vascular endothelial
ISG15	ISG15	Up in CM	Vascular endothelial
LDHA	LDHA	Up in CM	Vascular endothelial
LIMA1	LIMA1	Only in CM	Vascular endothelial
MACF1	MACF1	Only in CM	Vascular endothelial
MGP	MGP	Up in CM	Vascular endothelial
SIAS	NANS	Only in CM	Vascular endothelial
NRDC	NRDC	Only in CM	Vascular endothelial
PFKAP	PFKP	Up in CM	Vascular endothelial
PRKDC	PRKDC	Only in CM	Vascular endothelial
SYRC	RARS1	Only in CM	Vascular endothelial
SIL1	SIL1	Only in CM	Vascular endothelial
TFG	TFG	Only in CM	Vascular endothelial
TWF1	TWF1	Only in CM	Vascular endothelial
