# Supplementary material for: Primary human ovarian interstitial cells contribute to murine follicle growth through follicle-interstitial paracrine crosstalk
Source: Research Square preprint supplement (doi:10.21203/rs.3.rs-7593401/v1), 2025-09-24
Supplement: Supplementary file 17 [file Supplementary Table 5.xlsx]

## Sheet: 5_antibodies
Supplementary Table 5. Antibodies used for immunocytochemistry.
Target	Supplier	Catalog Number	RRID	Dilution
ACTA2 (SMA)	Sigma-Aldrich	A5228	AB_262054	1:200
APOC1	Abcam	ab198288	AB_3698448	1:200
DDX4	Abcam	ab27591	AB_11139638	1:200
FOXL2	Abcam	ab246511	AB_2895602	1:200
HMGB1	Abcam	ab18256	AB_444360	1:200
NR2F2 (COUPTFII)	R&D Systems	PPH714700	AB_2155627	1:200
SERPINE2	Proteintech	66203-1-IG	AB_2881594	1:400
TUBA1B (⍺-tubulin)	Cell Signaling Technology	8058S	AB_10860077	1:50
VWF	Abcam	ab154193	AB_3094475	1:200
Mouse IgG-AF488	Thermo Fisher	A21202	AB_141607	1:500
Rabbit IgG-AF488	Thermo Fisher	A21206	AB_2535792	1:500
Mouse IgG-AF568	Thermo Fisher	A10037	AB_11180865	1:500
Rabbit IgG-AF568	Thermo Fisher	A10042	AB_2534017	1:500
